# Supplementary material for: Suprabasal cells retain progenitor cell identity programs in eosinophilic esophagitis–driven basal cell hyperplasia
Source: PubMed Central journal article supplement (PMC10619442; doi:10.1172/jci.insight.171765), 2023-10-09
Supplement: jciinsight-8-171765-s079.pdf [file jciinsight-8-171765-s079.pdf]

## Supplemental Tables

Clevenger, MH, *et al.* Suprabasal cells retain progenitor cell identity programs in eosinophilic esophagitis-driven basal cell hyperplasia

### Table of Contents

|                                                                                                                                               |        |
|-----------------------------------------------------------------------------------------------------------------------------------------------|--------|
| <b>Supplemental Table 1.</b> Genes included in the quiescent gene signature. ....                                                             | pg 2   |
| <b>Supplemental Table 2.</b> Genes included in the superficial gene signature. ....                                                           | pg 5   |
| <b>Supplemental Table 3.</b> Genes corresponding to co-expressed modules along the EoE epithelial pseudotemporal trajectory.....              | pg 8   |
| <b>Supplemental Table 4.</b> Gene expression profile of module 7 genes in EoE vs healthy subjects. ....                                       | pg 22  |
| <b>Supplemental Table 5.</b> Identification of SOX2 and/or KLF5 downstream targets from Enrichr databases and literature-based analyses. .... | pg 24  |
| <b>Supplemental Table 6.</b> Module 7 genes known to be regulated by SOX2 and/or KLF5.....                                                    | pg 170 |
| <b>Supplemental Table 7.</b> Gene expression profile of upregulated EoE DEGs known to be regulated by SOX2 and/or KLF5. ....                  | pg 171 |
| <b>Supplemental Table 8.</b> Gene expression profile of EoE DEGs known to be regulated by the SOX2-KLF5 interaction.....                      | pg 192 |
| <b>Supplemental Table 9.</b> List of antibodies used in the study. ....                                                                       | pg 197 |

**Supplemental Table 1.** Genes included in the quiescent gene signature.

| gene     | p_val | avg_log2FC  | pct.1 | pct.2 | p_val_adj |
|----------|-------|-------------|-------|-------|-----------|
| DST      | 0     | 2.829762397 | 0.937 | 0.211 | 0         |
| KRT15    | 0     | 2.749389646 | 1     | 0.685 | 0         |
| KRT19    | 0     | 2.027514439 | 0.99  | 0.662 | 0         |
| GAS5     | 0     | 1.991027262 | 0.727 | 0.641 | 0         |
| CXCL14   | 0     | 1.930840409 | 0.497 | 0.095 | 0         |
| MIR205HG | 0     | 1.681103048 | 0.728 | 0.686 | 0         |
| TXNIP    | 0     | 1.679755517 | 0.787 | 0.396 | 0         |
| IL1R2    | 0     | 1.641511831 | 0.619 | 0.063 | 0         |
| IL18     | 0     | 1.616816891 | 0.9   | 0.729 | 0         |
| ZFP36L2  | 0     | 1.608479362 | 0.823 | 0.526 | 0         |
| IFITM3   | 0     | 1.606175204 | 0.858 | 0.54  | 0         |
| GPNMB    | 0     | 1.602788604 | 0.741 | 0.217 | 0         |
| CAV1     | 0     | 1.57258403  | 0.693 | 0.127 | 0         |
| IGFBP5   | 0     | 1.564140033 | 0.586 | 0.14  | 0         |
| GPX4     | 0     | 1.556344306 | 0.955 | 0.852 | 0         |
| MT-ND2   | 0     | 1.541729919 | 0.95  | 0.884 | 0         |
| COL17A1  | 0     | 1.504913141 | 0.68  | 0.1   | 0         |
| MALAT1   | 0     | 1.497386787 | 0.975 | 0.92  | 0         |
| TSLP     | 0     | 1.492823424 | 0.61  | 0.088 | 0         |
| FOS      | 0     | 1.469149928 | 0.977 | 0.939 | 0         |
| FTH1     | 0     | 1.451440638 | 0.972 | 0.929 | 0         |
| SLC3A2   | 0     | 1.428585636 | 0.811 | 0.576 | 0         |
| MT-ND1   | 0     | 1.42571156  | 0.953 | 0.891 | 0         |
| MT-ND3   | 0     | 1.409695337 | 0.967 | 0.922 | 0         |
| MT-CYB   | 0     | 1.374772617 | 0.979 | 0.933 | 0         |
| ATF3     | 0     | 1.369038577 | 0.828 | 0.673 | 0         |
| ATP1B3   | 0     | 1.315243129 | 0.871 | 0.741 | 0         |
| MT-ATP6  | 0     | 1.308089875 | 0.969 | 0.922 | 0         |
| SNHG8    | 0     | 1.296775833 | 0.926 | 0.798 | 0         |
| FHL2     | 0     | 1.288653373 | 0.659 | 0.194 | 0         |
| MT-CO3   | 0     | 1.262818148 | 0.977 | 0.944 | 0         |
| RPL34    | 0     | 1.252450795 | 1     | 0.994 | 0         |
| C12orf57 | 0     | 1.251320924 | 0.864 | 0.712 | 0         |
| ZFAS1    | 0     | 1.239408574 | 0.965 | 0.911 | 0         |
| CH25H    | 0     | 1.196781019 | 0.496 | 0.051 | 0         |
| DLK2     | 0     | 1.177325313 | 0.524 | 0.032 | 0         |
| NOP53    | 0     | 1.162744015 | 0.822 | 0.724 | 0         |
| MT-ND5   | 0     | 1.162255222 | 0.889 | 0.81  | 0         |
| SNHG7    | 0     | 1.141464301 | 0.756 | 0.639 | 0         |
| ASS1     | 0     | 1.110706576 | 0.554 | 0.123 | 0         |
| TSC22D1  | 0     | 1.091835855 | 0.546 | 0.305 | 0         |
| NAP1L1   | 0     | 1.090727748 | 0.812 | 0.664 | 0         |
| CD81     | 0     | 1.085738797 | 0.753 | 0.571 | 0         |

|              |   |             |       |       |   |
|--------------|---|-------------|-------|-------|---|
| NPR3         | 0 | 1.085345049 | 0.547 | 0.171 | 0 |
| CTNNAL1      | 0 | 1.0784772   | 0.52  | 0.054 | 0 |
| THSD4        | 0 | 1.075858062 | 0.567 | 0.254 | 0 |
| SNHG29       | 0 | 1.070984512 | 0.734 | 0.772 | 0 |
| EEF1D        | 0 | 1.069898077 | 0.98  | 0.945 | 0 |
| RPS27        | 0 | 1.058941417 | 1     | 0.994 | 0 |
| WNT4         | 0 | 1.051182329 | 0.588 | 0.419 | 0 |
| CIRBP        | 0 | 1.048393598 | 0.85  | 0.799 | 0 |
| RACK1        | 0 | 1.044522976 | 1     | 0.99  | 0 |
| MT-ND4       | 0 | 1.044313515 | 0.963 | 0.917 | 0 |
| LAMB3        | 0 | 1.044175468 | 0.558 | 0.166 | 0 |
| RPL10        | 0 | 1.04270105  | 1     | 0.998 | 0 |
| RPL30        | 0 | 1.041514408 | 1     | 0.993 | 0 |
| ITGB1        | 0 | 1.038297217 | 0.623 | 0.389 | 0 |
| RPL5         | 0 | 1.027958819 | 1     | 0.992 | 0 |
| LIMA1        | 0 | 1.019869097 | 0.605 | 0.379 | 0 |
| EPB41L4A-AS1 | 0 | 1.015005509 | 0.646 | 0.384 | 0 |
| RPS9         | 0 | 0.997767959 | 1     | 0.993 | 0 |
| SLC1A3       | 0 | 0.989165554 | 0.48  | 0.093 | 0 |
| RPL13        | 0 | 0.986841391 | 1     | 0.998 | 0 |
| SLC7A1       | 0 | 0.985424125 | 0.624 | 0.378 | 0 |
| RPS4X        | 0 | 0.977786324 | 1     | 0.997 | 0 |
| SLC7A5       | 0 | 0.959832268 | 0.522 | 0.109 | 0 |
| RPL12        | 0 | 0.954870183 | 1     | 0.996 | 0 |
| APP          | 0 | 0.934912332 | 0.515 | 0.196 | 0 |
| RPS3         | 0 | 0.933890118 | 1     | 0.996 | 0 |
| EIF3E        | 0 | 0.929264383 | 0.951 | 0.911 | 0 |
| ARPC1B       | 0 | 0.92852849  | 0.531 | 0.218 | 0 |
| RPL35A       | 0 | 0.926635559 | 1     | 0.992 | 0 |
| RPS5         | 0 | 0.917666457 | 1     | 0.991 | 0 |
| MT-CO1       | 0 | 0.910015039 | 0.988 | 0.958 | 0 |
| RPLP1        | 0 | 0.907581937 | 1     | 0.999 | 0 |
| NPM1         | 0 | 0.900359763 | 0.99  | 0.957 | 0 |
| RPL37        | 0 | 0.895612447 | 1     | 0.995 | 0 |
| RPL10A       | 0 | 0.894123777 | 1     | 0.991 | 0 |
| PDLIM1       | 0 | 0.892139816 | 0.832 | 0.788 | 0 |
| MTRNR2L8     | 0 | 0.887226548 | 0.519 | 0.487 | 0 |
| RPS19        | 0 | 0.884909432 | 1     | 0.997 | 0 |
| JUNB         | 0 | 0.884094259 | 0.855 | 0.863 | 0 |
| TP53AIP1     | 0 | 0.88224727  | 0.539 | 0.237 | 0 |
| MT2A         | 0 | 0.876672684 | 0.81  | 0.535 | 0 |
| TIMP1        | 0 | 0.87575402  | 0.462 | 0.104 | 0 |
| RPS21        | 0 | 0.873160764 | 0.998 | 0.988 | 0 |
| HNRNPA1      | 0 | 0.872899675 | 0.92  | 0.885 | 0 |
| RPL3         | 0 | 0.869343675 | 1     | 0.996 | 0 |
| PNRC1        | 0 | 0.852584474 | 0.736 | 0.703 | 0 |
| RPS15A       | 0 | 0.84947814  | 1     | 0.992 | 0 |

|         |   |             |       |       |   |
|---------|---|-------------|-------|-------|---|
| MT-ND4L | 0 | 0.849387461 | 0.61  | 0.566 | 0 |
| RPL18A  | 0 | 0.845159597 | 1     | 0.996 | 0 |
| BTF3    | 0 | 0.843251407 | 0.996 | 0.977 | 0 |
| RPL11   | 0 | 0.841695911 | 1     | 0.997 | 0 |
| KTN1    | 0 | 0.83970417  | 0.826 | 0.813 | 0 |
| RPL19   | 0 | 0.839507184 | 1     | 0.996 | 0 |
| POLR1D  | 0 | 0.839246533 | 0.838 | 0.823 | 0 |
| MT-CO2  | 0 | 0.836466386 | 0.987 | 0.961 | 0 |
| EGR1    | 0 | 0.835157992 | 0.808 | 0.764 | 0 |
| RPL32   | 0 | 0.833150593 | 1     | 0.998 | 0 |

**Supplemental Table 2.** Genes included in the superficial gene signature.

| gene      | p_val | avg_log2FC  | pct.1 | pct.2 | p_val_adj |
|-----------|-------|-------------|-------|-------|-----------|
| CRCT1     | 0     | 6.663212326 | 0.998 | 0.407 | 0         |
| CNFN      | 0     | 5.997242055 | 1     | 0.526 | 0         |
| KRT78     | 0     | 5.298534143 | 0.994 | 0.27  | 0         |
| SPRR2D    | 0     | 5.277971515 | 0.848 | 0.364 | 0         |
| LYPD2     | 0     | 5.240212687 | 0.992 | 0.242 | 0         |
| FAM25A    | 0     | 5.213556785 | 0.968 | 0.284 | 0         |
| ECM1      | 0     | 5.109232069 | 0.998 | 0.372 | 0         |
| MT1G      | 0     | 5.034032823 | 0.678 | 0.372 | 0         |
| SPINK7    | 0     | 4.961649141 | 0.939 | 0.18  | 0         |
| SPRR2A    | 0     | 4.847879757 | 0.952 | 0.567 | 0         |
| TMPRSS11B | 0     | 4.762628504 | 0.995 | 0.135 | 0         |
| FTH1      | 0     | 4.539188087 | 0.999 | 0.952 | 0         |
| MAL       | 0     | 4.438547514 | 1     | 0.571 | 0         |
| HOPX      | 0     | 4.340963854 | 0.997 | 0.708 | 0         |
| CRISP3    | 0     | 4.325306482 | 0.977 | 0.083 | 0         |
| FLG       | 0     | 4.244267247 | 0.598 | 0.052 | 0         |
| C15orf48  | 0     | 4.127274307 | 0.971 | 0.131 | 0         |
| LCN2      | 0     | 4.051987717 | 0.973 | 0.343 | 0         |
| ERO1A     | 0     | 4.012610375 | 0.981 | 0.314 | 0         |
| SPRR2E    | 0     | 3.965579924 | 0.749 | 0.288 | 0         |
| CRNN      | 0     | 3.951263614 | 0.999 | 0.386 | 0         |
| EMP1      | 0     | 3.933290949 | 0.999 | 0.692 | 0         |
| PSCA      | 0     | 3.913357265 | 0.941 | 0.127 | 0         |
| S100P     | 0     | 3.784702209 | 0.879 | 0.116 | 0         |
| MUC21     | 0     | 3.777149043 | 0.994 | 0.282 | 0         |
| ADIRF     | 0     | 3.75946849  | 0.97  | 0.538 | 0         |
| SPRR3     | 0     | 3.743637867 | 1     | 0.859 | 0         |
| PHLDA1    | 0     | 3.551732291 | 0.941 | 0.11  | 0         |
| PRSS27    | 0     | 3.295137849 | 0.983 | 0.179 | 0         |
| SCEL      | 0     | 3.236097127 | 0.99  | 0.397 | 0         |
| MXD1      | 0     | 3.197818467 | 0.97  | 0.203 | 0         |
| TGM3      | 0     | 3.127514331 | 0.988 | 0.308 | 0         |
| CYSRT1    | 0     | 3.101653855 | 0.981 | 0.343 | 0         |
| TMPRSS11E | 0     | 3.056300408 | 0.976 | 0.197 | 0         |
| C4orf3    | 0     | 3.050301701 | 0.993 | 0.75  | 0         |
| PPL       | 0     | 2.852724672 | 0.987 | 0.475 | 0         |
| MT2A      | 0     | 2.842034342 | 0.718 | 0.718 | 0         |
| MT1H      | 0     | 2.835812071 | 0.356 | 0.113 | 0         |
| LMO7      | 0     | 2.834768659 | 0.954 | 0.297 | 0         |
| AIF1L     | 0     | 2.790360446 | 0.942 | 0.117 | 0         |
| SPRR1B    | 0     | 2.708646086 | 0.809 | 0.324 | 0         |
| CSTB      | 0     | 2.708363743 | 1     | 0.949 | 0         |

|          |   |             |       |       |   |
|----------|---|-------------|-------|-------|---|
| SAMD9    | 0 | 2.691807079 | 0.944 | 0.317 | 0 |
| SLURP2   | 0 | 2.682477446 | 0.855 | 0.289 | 0 |
| NCCRP1   | 0 | 2.681409043 | 0.976 | 0.211 | 0 |
| CAMK2N1  | 0 | 2.669605001 | 0.91  | 0.027 | 0 |
| TTC9     | 0 | 2.669185763 | 0.948 | 0.196 | 0 |
| EPS8L1   | 0 | 2.658087037 | 0.956 | 0.113 | 0 |
| SPINK5   | 0 | 2.627968093 | 0.999 | 0.692 | 0 |
| PPDPF    | 0 | 2.562754409 | 0.997 | 0.881 | 0 |
| TIMP2    | 0 | 2.549920635 | 0.855 | 0.033 | 0 |
| RNASE7   | 0 | 2.53043594  | 0.533 | 0.024 | 0 |
| IL1RN    | 0 | 2.528853643 | 0.993 | 0.576 | 0 |
| NIBAN2   | 0 | 2.474299436 | 0.818 | 0.354 | 0 |
| DUSP5    | 0 | 2.450672188 | 0.845 | 0.114 | 0 |
| SAT1     | 0 | 2.424408514 | 0.988 | 0.789 | 0 |
| MT1M     | 0 | 2.422126718 | 0.292 | 0.094 | 0 |
| S100A9   | 0 | 2.421642912 | 1     | 0.921 | 0 |
| MYL12A   | 0 | 2.318396676 | 0.99  | 0.844 | 0 |
| IL18     | 0 | 2.300159819 | 0.983 | 0.784 | 0 |
| MUC1     | 0 | 2.283834402 | 0.792 | 0.071 | 0 |
| TMOD3    | 0 | 2.271593495 | 0.974 | 0.598 | 0 |
| C6orf132 | 0 | 2.250125477 | 0.957 | 0.427 | 0 |
| FAM3D    | 0 | 2.238508466 | 0.9   | 0.195 | 0 |
| ELF3     | 0 | 2.224858276 | 0.957 | 0.465 | 0 |
| KRT17    | 0 | 2.208476981 | 0.553 | 0.312 | 0 |
| SH3BGRL2 | 0 | 2.205070746 | 0.932 | 0.185 | 0 |
| SPNS2    | 0 | 2.190006205 | 0.836 | 0.033 | 0 |
| KRT16    | 0 | 2.188358007 | 0.754 | 0.32  | 0 |
| A2ML1    | 0 | 2.17596011  | 0.973 | 0.392 | 0 |
| ANXA11   | 0 | 2.172567648 | 0.972 | 0.567 | 0 |
| MT1E     | 0 | 2.16294391  | 0.577 | 0.616 | 0 |
| H2AFJ    | 0 | 2.10222954  | 0.976 | 0.626 | 0 |
| GCHFR    | 0 | 2.049766    | 0.862 | 0.369 | 0 |
| SFTA2    | 0 | 2.045810841 | 0.877 | 0.094 | 0 |
| HILPDA   | 0 | 2.042207511 | 0.575 | 0.27  | 0 |
| ADGRF1   | 0 | 1.991916337 | 0.82  | 0.122 | 0 |
| ANXA1    | 0 | 1.954987483 | 1     | 0.969 | 0 |
| MALL     | 0 | 1.94355763  | 0.973 | 0.472 | 0 |
| SLURP1   | 0 | 1.937649171 | 0.918 | 0.313 | 0 |
| RAB5IF   | 0 | 1.929411281 | 0.949 | 0.625 | 0 |
| LGALS3   | 0 | 1.929328711 | 0.995 | 0.937 | 0 |
| TAX1BP1  | 0 | 1.913210716 | 0.967 | 0.576 | 0 |
| CLIC3    | 0 | 1.869309291 | 0.959 | 0.415 | 0 |
| S100A8   | 0 | 1.85301537  | 1     | 0.885 | 0 |
| PRSS3    | 0 | 1.828960014 | 0.862 | 0.093 | 0 |
| CD59     | 0 | 1.819298232 | 0.967 | 0.624 | 0 |
| CST6     | 0 | 1.818308314 | 0.878 | 0.119 | 0 |
| GLUL     | 0 | 1.809863604 | 0.676 | 0.435 | 0 |

|        |   |             |       |       |   |
|--------|---|-------------|-------|-------|---|
| HPGD   | 0 | 1.807314504 | 0.912 | 0.383 | 0 |
| KLK12  | 0 | 1.79835912  | 0.635 | 0.175 | 0 |
| DHRS9  | 0 | 1.786528228 | 0.711 | 0.018 | 0 |
| PLAC8  | 0 | 1.771809915 | 0.734 | 0.2   | 0 |
| TMEM40 | 0 | 1.74106641  | 0.963 | 0.511 | 0 |
| TPM4   | 0 | 1.723422329 | 0.969 | 0.664 | 0 |
| SNCG   | 0 | 1.687185291 | 0.721 | 0.053 | 0 |
| RIOK3  | 0 | 1.652755952 | 0.952 | 0.626 | 0 |
| YOD1   | 0 | 1.652293029 | 0.693 | 0.078 | 0 |
| SDCBP2 | 0 | 1.650459311 | 0.91  | 0.32  | 0 |
| CD24   | 0 | 1.638709797 | 0.99  | 0.564 | 0 |

**Supplemental Table 3.** Genes corresponding to co-expressed modules along the EoE epithelial pseudotemporal trajectory.

| gene       | module | supermodule | dim_1        | dim_2        | status | p_value     | morans_test_statistic | morans_l    | q_value     |
|------------|--------|-------------|--------------|--------------|--------|-------------|-----------------------|-------------|-------------|
| AC020916.1 | 1      | 1           | 1.639280215  | -2.488101603 | OK     |             | 251.3780328           | 0.254997076 | 0           |
| AC036176.3 | 1      | 1           | 1.684323863  | -2.503947617 | OK     |             | 126.1473819           | 0.127955766 | 0           |
| ADH1C      | 1      | 1           | 0.319838539  | -3.033913674 | OK     |             | 106.8289895           | 0.108348199 | 0           |
| ADM        | 1      | 1           | 0.863050229  | -3.030575337 | OK     |             | 143.3322682           | 0.145389691 | 0           |
| APCDD1     | 1      | 1           | 0.538907961  | -2.499797227 | OK     |             | 158.4539216           | 0.16072909  | 0           |
| APOBEC3A   | 1      | 1           | 2.508020416  | -2.591249706 | OK     |             | 144.5728216           | 0.146645358 | 0           |
| AREG       | 1      | 1           | 2.392676488  | -2.629367234 | OK     |             | 257.2458014           | 0.260947948 | 0           |
| ASS1       | 1      | 1           | 0.560633258  | -2.920699002 | OK     |             | 346.705388            | 0.35169657  | 0           |
| BASP1      | 1      | 1           | 0.282518283  | -3.296340169 | OK     |             | 237.0933783           | 0.240497285 | 0           |
| BCAM       | 1      | 1           | 0.468359694  | -3.365264447 | OK     |             | 257.5000892           | 0.261195281 | 0           |
| BHLHE40    | 1      | 1           | 2.382114068  | -2.643254162 | OK     |             | 276.6513126           | 0.28063536  | 0           |
| BMP2       | 1      | 1           | 0.852943898  | -2.869146766 | OK     |             | 105.7401336           | 0.10724814  | 0           |
| BST2       | 1      | 1           | -0.690088137 | -2.770016672 | OK     |             | 152.2795412           | 0.154464325 | 0           |
| BTG2       | 1      | 1           | 1.574786977  | -2.563254596 | OK     |             | 277.8133387           | 0.281814399 | 0           |
| C1R        | 1      | 1           | -0.585594281 | -2.930390836 | OK     |             | 251.4742279           | 0.25508269  | 0           |
| CALML3     | 1      | 1           | 1.173150763  | -1.425154926 | OK     |             | 361.5015277           | 0.366709242 | 0           |
| CASC19     | 1      | 1           | 0.111580805  | -2.182737948 | OK     |             | 142.600573            | 0.144642809 | 0           |
| CAV1       | 1      | 1           | 0.09860243   | -2.922177555 | OK     |             | 514.6421679           | 0.522060707 | 0           |
| CAVIN2     | 1      | 1           | 0.909654715  | -2.925697805 | OK     |             | 119.7009119           | 0.121415339 | 0           |
| CDC80      | 1      | 1           | 0.513993905  | -2.903766514 | OK     |             | 139.6095003           | 0.141598815 | 0           |
| CCL20      | 1      | 1           | 1.002225228  | -2.643324854 | OK     | 9.37E-292   | 36.48564812           | 0.036994726 | 9.48E-292   |
| CCL4       | 1      | 1           | 1.999881879  | -4.156357737 | OK     | 3.79E-152   | 26.2477909            | 0.026606686 | 3.81E-152   |
| CCN1       | 1      | 1           | 0.77189231   | -2.910440923 | OK     |             | 197.8381453           | 0.200674161 | 0           |
| CCND1      | 1      | 1           | 0.636073903  | -1.770222904 | OK     |             | 362.9119658           | 0.368141595 | 0           |
| CCND2      | 1      | 1           | 0.367253617  | -2.54338968  | OK     |             | 234.2296091           | 0.23759432  | 0           |
| CD55       | 1      | 1           | 2.35637571   | -2.351353289 | OK     |             | 370.4750918           | 0.375814658 | 0           |
| CD74       | 1      | 1           | -0.655046328 | -2.785525443 | OK     |             | 191.5775062           | 0.194331465 | 0           |
| CDKN1A     | 1      | 1           | 2.458906785  | -2.559730412 | OK     |             | 264.6479424           | 0.268458584 | 0           |
| CDKN2B     | 1      | 1           | 2.322521821  | -2.245069148 | OK     |             | 315.3491555           | 0.319890431 | 0           |
| CFB        | 1      | 1           | -0.672548517 | -2.75234151  | OK     |             | 142.8735756           | 0.144923465 | 0           |
| CH25H      | 1      | 1           | -0.303361758 | -2.863647701 | OK     |             | 243.1075023           | 0.246604479 | 0           |
| CLDN4      | 1      | 1           | 2.610721961  | -2.507062437 | OK     |             | 486.9148983           | 0.493935886 | 0           |
| CLEC2B     | 1      | 1           | 1.817905859  | -4.081781508 | OK     |             | 134.2228228           | 0.13614883  | 0           |
| CLU        | 1      | 1           | -0.615097388 | -2.918249787 | OK     |             | 115.1698537           | 0.116814647 | 0           |
| COL17A1    | 1      | 1           | 0.254001633  | -2.500339271 | OK     |             | 547.7495959           | 0.555643717 | 0           |
| CRABP2     | 1      | 1           | 1.807100311  | -1.92574084  | OK     |             | 365.6871792           | 0.370953409 | 0           |
| CRIP1      | 1      | 1           | 1.011198164  | -1.699302198 | OK     |             | 152.03995             | 0.154224088 | 0           |
| CRIP2      | 1      | 1           | 1.081225858  | -1.483327152 | OK     |             | 139.583941            | 0.14158715  | 0           |
| CTNNA1     | 1      | 1           | 0.117452518  | -3.212987961 | OK     |             | 523.8488433           | 0.531391276 | 0           |
| CTSG       | 1      | 1           | 1.930303231  | -4.230151118 | OK     |             | 69.62924232           | 0.070601767 | 0           |
| CXCL14     | 1      | 1           | 1.252691582  | -1.564850332 | OK     |             | 277.1710439           | 0.281144015 | 0           |
| CXCL2      | 1      | 1           | 1.307683245  | -1.749804498 | OK     | 2.79E-184   | 28.92629484           | 0.02932487  | 2.81E-184   |
| CYP2E1     | 1      | 1           | -0.547377571 | -2.791121842 | OK     |             | 67.68390842           | 0.068647956 | 0           |
| CYP3A5     | 1      | 1           | 1.863548533  | -2.087296845 | OK     |             | 103.0310223           | 0.104504573 | 0           |
| DLK2       | 1      | 1           | 0.408009574  | -3.390769394 | OK     |             | 412.9989488           | 0.418934834 | 0           |
| DST        | 1      | 1           | 0.461137876  | -2.536338927 | OK     |             | 568.3045922           | 0.576500484 | 0           |
| DUSP2      | 1      | 1           | 1.954672948  | -2.62598622  | OK     |             | 51.81895849           | 0.052553487 | 0           |
| EDN1       | 1      | 1           | 0.873765824  | -3.031929316 | OK     |             | 127.9897084           | 0.129814816 | 0           |
| EFNB2      | 1      | 1           | 2.486477033  | -2.501721026 | OK     |             | 128.9859157           | 0.130835068 | 0           |
| EGR3       | 1      | 1           | 1.452322618  | -2.574064376 | OK     |             | 84.38707069           | 0.08558792  | 0           |
| EIF1AY     | 1      | 1           | -0.087112948 | -2.366085531 | OK     |             | 70.75675467           | 0.07176476  | 0           |
| EMP3       | 1      | 1           | -0.209373459 | -3.079365791 | OK     |             | 256.9533955           | 0.260638811 | 0           |
| EPHA2      | 1      | 1           | 2.656547204  | -2.423860552 | OK     |             | 246.0033154           | 0.249543809 | 0           |
| FABP5      | 1      | 1           | 0.751234681  | -2.021072628 | OK     |             | 502.6097048           | 0.509847502 | 0           |
| FKBP2      | 1      | 1           | 0.476845965  | -3.516573073 | OK     |             | 53.25941835           | 0.054015331 | 0           |
| FLNA       | 1      | 1           | -0.133041009 | -2.099577548 | OK     |             | 231.8223223           | 0.235158029 | 0           |
| FST        | 1      | 1           | 0.414912657  | -3.388290794 | OK     |             | 125.6322119           | 0.127419657 | 0           |
| FXR1       | 1      | 1           | 0.292254106  | -3.399874957 | OK     |             | 96.55240375           | 0.097932855 | 0           |
| G0S2       | 1      | 1           | -0.157118663 | -2.87777275  | OK     |             | 140.1699029           | 0.142155865 | 0           |
| GADD45A    | 1      | 1           | 1.241321043  | -2.991256358 | OK     |             | 196.1514741           | 0.198972735 | 0           |
| GADD45B    | 1      | 1           | 2.258333341  | -1.481868269 | OK     |             | 105.6110451           | 0.107124251 | 0           |
| GBP1       | 1      | 1           | 1.11546667   | -2.944585206 | OK     |             | 142.4951207           | 0.144538675 | 0           |
| GBP4       | 1      | 1           | -0.714406117 | -2.427138926 | OK     |             | 95.03652978           | 0.096395348 | 0           |
| GCLC       | 1      | 1           | 0.342774705  | -2.376273872 | OK     |             | 203.325739            | 0.206248864 | 0           |
| GEM        | 1      | 1           | 1.291326687  | -1.651242735 | OK     |             | 116.9290194           | 0.118554234 | 0           |
| GLDC       | 1      | 1           | -0.276514157 | -2.633357288 | OK     |             | 157.210424            | 0.15946526  | 0           |
| GLUL       | 1      | 1           | 0.434214458  | -2.757886411 | OK     |             | 159.2299888           | 0.161517858 | 0           |
| HBA2       | 1      | 1           | 2.493381993  | -4.069203676 | OK     | 0.000384831 | 3.363480976           | 0.003393754 | 0.000385056 |
| HBB        | 1      | 1           | 2.377574102  | -3.734611923 | OK     | 5.27E-50    | 14.82207236           | 0.015011786 | 5.30E-50    |
| HBEGF      | 1      | 1           | 2.164289252  | -2.679343821 | OK     |             | 153.9177792           | 0.156128672 | 0           |



|           |   |   |              |               |    |           |             |             |           |
|-----------|---|---|--------------|---------------|----|-----------|-------------|-------------|-----------|
| HES1      | 1 | 1 | 1.357425228  | -2.382722975  | OK | 0         | 201.3878748 | 0.204284314 | 0         |
| HLA-DRA   | 1 | 1 | -0.568672403 | -2.835550191  | OK | 9.69E-265 | 34.7403494  | 0.035226997 | 9.80E-265 |
| ID1       | 1 | 1 | 2.581723586  | -2.617908122  | OK | 0         | 242.6811155 | 0.246174717 | 0         |
| ID3       | 1 | 1 | 2.521021262  | -2.492029907  | OK | 0         | 241.5796604 | 0.245057319 | 0         |
| ID4       | 1 | 1 | 1.217843548  | -1.420264246  | OK | 0         | 202.8877829 | 0.20580637  | 0         |
| IFI27     | 1 | 1 | -0.675456866 | -2.200739743  | OK | 0         | 181.7270298 | 0.184339738 | 0         |
| IFIT3     | 1 | 1 | -0.703901156 | -2.729019286  | OK | 0         | 74.26490012 | 0.075322566 | 0         |
| IFITM1    | 1 | 1 | -0.570020303 | -2.7569654    | OK | 0         | 187.9036526 | 0.190596143 | 0         |
| IFITM2    | 1 | 1 | 1.011107982  | -1.782858373  | OK | 0         | 74.91433667 | 0.075982435 | 0         |
| IGFBP3    | 1 | 1 | 0.371005431  | -2.700244309  | OK | 0         | 306.9375209 | 0.311350376 | 0         |
| IGFBP5    | 1 | 1 | 0.588681982  | -2.719751121  | OK | 0         | 160.1798855 | 0.162478545 | 0         |
| IGFBP6    | 1 | 1 | 0.787968048  | -2.105188014  | OK | 0         | 262.7523086 | 0.266528557 | 0         |
| IGFBP7    | 1 | 1 | -0.346240743 | -2.96817881   | OK | 0         | 352.2977457 | 0.357359273 | 0         |
| IGHA1     | 1 | 1 | 2.557645098  | -4.251122923  | OK | 1.41E-126 | 23.90349071 | 0.024215223 | 1.42E-126 |
| IGKC      | 1 | 1 | 2.54377009   | -4.25130731   | OK | 2.44E-46  | 14.24399628 | 0.014430413 | 2.45E-46  |
| IGLC1     | 1 | 1 | 2.556192414  | -4.246733756  | OK | 2.08E-45  | 14.09346196 | 0.014242158 | 2.09E-45  |
| IGLC2     | 1 | 1 | 2.554935471  | -4.255022736  | OK | 5.26E-49  | 14.66684552 | 0.014847509 | 5.28E-49  |
| IGLC3     | 1 | 1 | 2.555681483  | -4.232765646  | OK | 1.59E-16  | 8.165986867 | 0.008246619 | 1.60E-16  |
| IL18      | 1 | 1 | 0.524979637  | -3.263586702  | OK | 0         | 296.1337585 | 0.300398808 | 0         |
| IL1R2     | 1 | 1 | -0.234344944 | -3.118945004  | OK | 0         | 545.0326173 | 0.552880492 | 0         |
| IRF1      | 1 | 1 | -0.604711636 | -2.693165304  | OK | 0         | 170.8912911 | 0.173347244 | 0         |
| ISG15     | 1 | 1 | -0.662907823 | -2.142244817  | OK | 0         | 53.05617638 | 0.053809125 | 0         |
| ITGA6     | 1 | 1 | 0.254386679  | -2.404686691  | OK | 0         | 303.19091   | 0.307556875 | 0         |
| ITM2A     | 1 | 1 | 1.483513609  | -1.334334852  | OK | 5.07E-44  | 13.86630512 | 0.014049758 | 5.08E-44  |
| ITPKC     | 1 | 1 | 2.682129756  | -2.470367552  | OK | 0         | 229.6816513 | 0.232987191 | 0         |
| JCHAIN    | 1 | 1 | 2.560954109  | -4.249203862  | OK | 3.61E-250 | 33.76159979 | 0.034170307 | 3.65E-250 |
| KCNQ1OT1  | 1 | 1 | 1.962834135  | -2.233455183  | OK | 0         | 90.04412084 | 0.09132927  | 0         |
| KLF2      | 1 | 1 | 2.378366247  | -1.9802718374 | OK | 0         | 126.2714861 | 0.128081454 | 0         |
| KLF6      | 1 | 1 | 1.352223173  | -2.84309137   | OK | 0         | 265.1055937 | 0.268921095 | 0         |
| KLK5      | 1 | 1 | 0.547773943  | -3.337084921  | OK | 0         | 118.4480083 | 0.120138301 | 0         |
| KRT14     | 1 | 1 | 1.203801558  | -1.93390453   | OK | 0         | 517.0799878 | 0.524536923 | 0         |
| KRT17     | 1 | 1 | 0.385406092  | -2.944312097  | OK | 0         | 232.3568361 | 0.235701003 | 0         |
| KRT31     | 1 | 1 | 0.948314369  | -1.837954284  | OK | 0         | 56.15630649 | 0.056951543 | 0         |
| KRT8      | 1 | 1 | 1.223441348  | -1.860041501  | OK | 0         | 223.0145213 | 0.226223633 | 0         |
| LAMB3     | 1 | 1 | 0.040065662  | -2.469382884  | OK | 0         | 415.3611254 | 0.42134732  | 0         |
| LDLR      | 1 | 1 | 2.208782212  | -2.645735146  | OK | 0         | 155.3873989 | 0.157619287 | 0         |
| LGALS1    | 1 | 1 | 1.380708233  | -1.755956175  | OK | 2.14E-224 | 31.95732083 | 0.032402031 | 2.16E-224 |
| LGALS7    | 1 | 1 | 1.090734795  | -2.069419266  | OK | 0         | 126.3137809 | 0.128126543 | 0         |
| LGALSL    | 1 | 1 | 2.319630281  | -2.184257628  | OK | 0         | 335.035367  | 0.339862205 | 0         |
| LOXL4     | 1 | 1 | -0.196646556 | -2.750904919  | OK | 0         | 248.8545188 | 0.252411234 | 0         |
| LSP1      | 1 | 1 | 1.118721039  | -1.639778854  | OK | 8.94E-25  | 10.21000348 | 0.01034101  | 8.96E-25  |
| LTF       | 1 | 1 | -0.588402733 | -2.765226962  | OK | 0         | 87.20869164 | 0.088434068 | 0         |
| MAFF      | 1 | 1 | 2.511035935  | -2.526869656  | OK | 0         | 211.3821363 | 0.21442287  | 0         |
| MALAT1    | 1 | 1 | 1.566699818  | -2.224784733  | OK | 0         | 274.782913  | 0.278732686 | 0         |
| MAP3K8    | 1 | 1 | 2.390411869  | -2.413751961  | OK | 0         | 135.6530637 | 0.137598662 | 0         |
| MIDN      | 1 | 1 | 2.452559129  | -2.541659714  | OK | 0         | 233.2363591 | 0.236593418 | 0         |
| MT-ND4L   | 1 | 1 | 1.018873767  | -2.333582045  | OK | 0         | 173.4250491 | 0.17591813  | 0         |
| MTRNR2L8  | 1 | 1 | 0.833866731  | -2.226135613  | OK | 0         | 48.66179031 | 0.04935217  | 0         |
| MYADM     | 1 | 1 | 1.113583491  | -2.805315138  | OK | 0         | 144.0347554 | 0.146098441 | 0         |
| MYO1B     | 1 | 1 | 0.028748051  | -2.444175841  | OK | 0         | 138.4852347 | 0.140469925 | 0         |
| NCOA7     | 1 | 1 | 1.155426995  | -2.834561767  | OK | 0         | 337.5638755 | 0.342427952 | 0         |
| NEAT1     | 1 | 1 | 1.83694394   | -2.380966427  | OK | 0         | 267.4669646 | 0.271313838 | 0         |
| NEDD9     | 1 | 1 | 0.333454684  | -2.761224748  | OK | 0         | 193.8402198 | 0.196605034 | 0         |
| NIBAN1    | 1 | 1 | -0.134676083 | -2.076206686  | OK | 0         | 123.085989  | 0.12485015  | 0         |
| NPPC      | 1 | 1 | 1.228182689  | -1.538484813  | OK | 0         | 114.497038  | 0.11605357  | 0         |
| NR4A1     | 1 | 1 | 1.543684438  | -2.590475203  | OK | 0         | 169.8232228 | 0.172263505 | 0         |
| NR4A2     | 1 | 1 | 1.54458274   | -2.543335916  | OK | 4.35E-307 | 37.44012295 | 0.037966936 | 4.41E-307 |
| NRARP     | 1 | 1 | 2.601736442  | -2.467336895  | OK | 0         | 394.009364  | 0.399689073 | 0         |
| NSUN6     | 1 | 1 | 1.329912082  | -2.377381088  | OK | 0         | 49.45029147 | 0.050149525 | 0         |
| OVOL1     | 1 | 1 | 2.476075903  | -2.590224864  | OK | 0         | 188.088242  | 0.190792516 | 0         |
| PDPN      | 1 | 1 | -0.196337208 | -2.996297182  | OK | 0         | 311.1397947 | 0.31560801  | 0         |
| PEG3      | 1 | 1 | 0.799546667  | -2.360571028  | OK | 9.24E-221 | 31.69454113 | 0.032130556 | 9.32E-221 |
| PER3      | 1 | 1 | 0.675755561  | -1.963496448  | OK | 0         | 132.3432152 | 0.134241907 | 0         |
| PHGDH     | 1 | 1 | 0.522620664  | -3.547712685  | OK | 0         | 233.1862418 | 0.23653939  | 0         |
| PHLDA2    | 1 | 1 | 2.583079115  | -2.493777754  | OK | 0         | 345.8296751 | 0.350813315 | 0         |
| PLAUR     | 1 | 1 | 2.397017375  | -2.617506148  | OK | 0         | 90.32190452 | 0.091612232 | 0         |
| PLK2      | 1 | 1 | 1.187501684  | -2.941412152  | OK | 0         | 172.1827367 | 0.174657582 | 0         |
| PLK3      | 1 | 1 | 1.848076061  | -2.375512125  | OK | 0         | 89.0196517  | 0.090292174 | 0         |
| POSTN     | 1 | 1 | -0.368769034 | -2.501061918  | OK | 0         | 232.6168156 | 0.235962398 | 0         |
| PRRX1     | 1 | 1 | -0.340539917 | -2.662184478  | OK | 0         | 223.6743965 | 0.226881018 | 0         |
| PRSS23    | 1 | 1 | -0.110737189 | -2.750689747  | OK | 0         | 184.9629801 | 0.187602854 | 0         |
| RAB11FIP1 | 1 | 1 | 2.403470889  | -2.333914878  | OK | 0         | 462.1266184 | 0.468790566 | 0         |
| RAB31     | 1 | 1 | -0.025321587 | -2.504320861  | OK | 0         | 94.22632269 | 0.095572087 | 0         |

|           |   |   |              |              |    |           |             |             |           |
|-----------|---|---|--------------|--------------|----|-----------|-------------|-------------|-----------|
| RAMP1     | 1 | 1 | 0.188344732  | -3.315486015 | OK | 0         | 317.2659924 | 0.321820029 | 0         |
| RHOB      | 1 | 1 | 2.242625371  | -1.449702264 | OK | 0         | 202.4356987 | 0.205347422 | 0         |
| RPS4Y1    | 1 | 1 | -0.055976137 | -2.476873638 | OK | 0         | 186.392789  | 0.189073109 | 0         |
| RRAD      | 1 | 1 | 2.504522458  | -2.524190785 | OK | 0         | 279.0862894 | 0.283105414 | 0         |
| S100A9    | 1 | 1 | -0.452807649 | -2.634343626 | OK | 0         | 389.1506354 | 0.394745634 | 0         |
| SAA1      | 1 | 1 | -0.542092308 | -2.953328671 | OK | 0         | 186.5676271 | 0.189238399 | 0         |
| SERPINB2  | 1 | 1 | 2.394515411  | -2.290807606 | OK | 0         | 359.4517273 | 0.364632018 | 0         |
| SLC1A3    | 1 | 1 | 0.518800721  | -2.612765075 | OK | 0         | 347.6272537 | 0.352624721 | 0         |
| SLC25A25  | 1 | 1 | 2.35760893   | -2.665043356 | OK | 0         | 123.5270162 | 0.125297153 | 0         |
| SLC7A2    | 1 | 1 | 0.472764239  | -2.380517484 | OK | 0         | 111.0431031 | 0.112626557 | 0         |
| SLC7A5    | 1 | 1 | 0.55456169   | -2.591320039 | OK | 0         | 357.6538348 | 0.362800445 | 0         |
| SNHG17    | 1 | 1 | 0.759468571  | -2.21122575  | OK | 0         | 74.24134721 | 0.075300069 | 0         |
| SOCS3     | 1 | 1 | -0.331208214 | -2.883567931 | OK | 0         | 140.3157356 | 0.142328816 | 0         |
| SOD2      | 1 | 1 | -0.593009814 | -2.747240783 | OK | 0         | 188.8917606 | 0.191607998 | 0         |
| SOX4      | 1 | 1 | 0.829217896  | -2.552506448 | OK | 0         | 98.85032033 | 0.100265606 | 0         |
| SOX9      | 1 | 1 | 2.555351988  | -2.578988077 | OK | 0         | 98.2141115  | 0.099619063 | 0         |
| SRGN      | 1 | 1 | 1.931935207  | -4.225006135 | OK | 0         | 48.95780565 | 0.049640921 | 0         |
| SYNPO2    | 1 | 1 | -0.113116547 | -2.643561007 | OK | 0         | 250.203614  | 0.253787951 | 0         |
| SYT8      | 1 | 1 | 1.029980273  | -1.718196632 | OK | 0         | 81.57041209 | 0.082734243 | 0         |
| TIMP1     | 1 | 1 | -0.365753516 | -2.628055813 | OK | 0         | 347.6863231 | 0.352696174 | 0         |
| TINAGL1   | 1 | 1 | -0.211673602 | -2.832720877 | OK | 0         | 168.6046847 | 0.171013468 | 0         |
| TNC       | 1 | 1 | -0.151409372 | -2.705799343 | OK | 0         | 284.1738482 | 0.288246259 | 0         |
| TNFAIP2   | 1 | 1 | -0.658591493 | -2.533924343 | OK | 0         | 197.2090193 | 0.209043031 | 0         |
| TNFAIP3   | 1 | 1 | 1.433981672  | -2.693844432 | OK | 0         | 50.76613644 | 0.051485738 | 0         |
| TNFRSF12A | 1 | 1 | 0.076904849  | -2.818001153 | OK | 0         | 126.3962489 | 0.12820449  | 0         |
| TPM2      | 1 | 1 | 0.403067157  | -3.443870069 | OK | 0         | 192.4588265 | 0.195212845 | 0         |
| TPPP3     | 1 | 1 | 1.007442192  | -1.700606348 | OK | 0         | 89.45077119 | 0.090727134 | 0         |
| TPSAB1    | 1 | 1 | 1.956884161  | -4.246059717 | OK | 0         | 105.468717  | 0.106962053 | 0         |
| TPSB2     | 1 | 1 | 1.921123997  | -4.242013218 | OK | 0         | 113.88851   | 0.115504233 | 0         |
| TRIB1     | 1 | 1 | 1.476699785  | -2.838272633 | OK | 0         | 77.35067692 | 0.078454578 | 0         |
| TSLP      | 1 | 1 | 0.266598836  | -3.335943909 | OK | 0         | 368.0925964 | 0.373390112 | 0         |
| TUBB2A    | 1 | 1 | 2.517115614  | -2.008536817 | OK | 0         | 217.7546552 | 0.220887095 | 0         |
| TXNIP     | 1 | 1 | 0.082129554  | -2.866490068 | OK | 0         | 247.3527351 | 0.25091322  | 0         |
| UGCG      | 1 | 1 | -0.69958578  | -2.452220918 | OK | 0         | 134.2644889 | 0.136191135 | 0         |
| VIM       | 1 | 1 | 1.897630469  | -4.184362801 | OK | 8.36E-207 | 30.66491519 | 0.031090937 | 8.43E-207 |
| WNT10A    | 1 | 1 | 0.45750247   | -3.267883422 | OK | 0         | 389.7178211 | 0.39532058  | 0         |
| XIST      | 1 | 1 | 1.056280569  | -2.099429132 | OK | 0         | 71.0457907  | 0.072058953 | 0         |
| ZNF750    | 1 | 1 | 2.368177668  | -2.423241021 | OK | 0         | 440.6977967 | 0.447051918 | 0         |
| ASF1B     | 2 | 2 | -4.339882597 | -6.223984481 | OK | 0         | 303.6197256 | 0.307970249 | 0         |
| ATAD2     | 2 | 2 | -4.257139429 | -5.882794859 | OK | 0         | 332.4975271 | 0.337284161 | 0         |
| ATAD5     | 2 | 2 | -4.159812673 | -5.814746739 | OK | 0         | 294.7481882 | 0.298979108 | 0         |
| BRCA1     | 2 | 2 | -4.02936004  | -5.897448064 | OK | 0         | 324.5089025 | 0.329167832 | 0         |
| BRCA2     | 2 | 2 | -4.240623697 | -5.727677585 | OK | 0         | 307.555001  | 0.311968537 | 0         |
| CARHSP1   | 2 | 2 | -4.483340009 | -6.193916322 | OK | 0         | 270.5745973 | 0.274470824 | 0         |
| CCDC34    | 2 | 2 | -5.148061498 | -6.522906543 | OK | 0         | 265.4406665 | 0.269261787 | 0         |
| CDCA5     | 2 | 2 | -4.89060901  | -5.893674852 | OK | 0         | 322.045084  | 0.326657235 | 0         |
| CDCA7     | 2 | 2 | -3.511877283 | -6.095230581 | OK | 0         | 291.3183535 | 0.29550243  | 0         |
| CDT1      | 2 | 2 | -3.491524442 | -6.169977667 | OK | 0         | 302.2505479 | 0.306593012 | 0         |
| CENPK     | 2 | 2 | -4.805449709 | -6.448268177 | OK | 0         | 367.7205942 | 0.373007197 | 0         |
| CENPM     | 2 | 2 | -4.802062734 | -6.448778869 | OK | 0         | 383.4095938 | 0.388921592 | 0         |
| CENPU     | 2 | 2 | -4.124042734 | -6.1760664   | OK | 0         | 248.5664698 | 0.252141656 | 0         |
| CEP78     | 2 | 2 | -4.318910345 | -5.683482887 | OK | 0         | 183.1694548 | 0.185795037 | 0         |
| CHEK1     | 2 | 2 | -3.690222486 | -6.049997331 | OK | 0         | 290.5412327 | 0.294715062 | 0         |
| CLSPN     | 2 | 2 | -4.092672094 | -6.093418361 | OK | 0         | 389.6023096 | 0.395192926 | 0         |
| DEK       | 2 | 2 | -3.670383676 | -6.027088405 | OK | 0         | 361.7305588 | 0.36694275  | 0         |
| DHFR      | 2 | 2 | -4.31337808  | -6.14951873  | OK | 0         | 336.6264085 | 0.341467552 | 0         |
| DNMT1     | 2 | 2 | -3.743537172 | -5.96856928  | OK | 0         | 320.6282158 | 0.325245044 | 0         |
| DUT       | 2 | 2 | -3.766904577 | -6.135896207 | OK | 0         | 312.5193279 | 0.317021209 | 0         |
| E2F8      | 2 | 2 | -4.827411875 | -5.795890214 | OK | 0         | 224.0968609 | 0.227315581 | 0         |
| ESCO2     | 2 | 2 | -4.901314958 | -5.854121448 | OK | 0         | 417.5632557 | 0.423550427 | 0         |
| EZH2      | 2 | 2 | -4.688194021 | -5.789565684 | OK | 0         | 212.581927  | 0.21563699  | 0         |
| FAM111B   | 2 | 2 | -4.009516939 | -6.045913459 | OK | 0         | 420.2372258 | 0.426279261 | 0         |
| FANCI     | 2 | 2 | -4.567585214 | -5.804541232 | OK | 0         | 306.0426272 | 0.310436999 | 0         |
| FBXO5     | 2 | 2 | -4.943127378 | -5.854895832 | OK | 0         | 294.1621827 | 0.298379331 | 0         |
| FEN1      | 2 | 2 | -3.990973696 | -6.190478088 | OK | 0         | 301.9577638 | 0.306296898 | 0         |
| GINS2     | 2 | 2 | -3.501417383 | -6.136640312 | OK | 0         | 349.9647539 | 0.354994236 | 0         |
| GMNN      | 2 | 2 | -3.658759817 | -6.060009958 | OK | 0         | 260.1691145 | 0.263911436 | 0         |
| HELLS     | 2 | 2 | -3.728663191 | -6.020137788 | OK | 0         | 414.2059156 | 0.420169044 | 0         |
| HES4      | 2 | 2 | -4.158427461 | -6.237429859 | OK | 0         | 260.8087447 | 0.264562814 | 0         |
| HIST1H1A  | 2 | 2 | 0.114293293  | -8.624274255 | OK | 0         | 371.44293   | 0.376778034 | 0         |
| HIST1H1B  | 2 | 2 | 0.127776817  | -8.609434129 | OK | 0         | 447.9944124 | 0.454435521 | 0         |
| HIST1H1C  | 2 | 2 | 0.10637565   | -8.633271696 | OK | 0         | 179.4587549 | 0.182038482 | 0         |
| HIST1H1D  | 2 | 2 | 0.135121599  | -8.668076994 | OK | 0         | 341.4522203 | 0.346366147 | 0         |

|           |   |   |              |              |    |   |             |             |   |
|-----------|---|---|--------------|--------------|----|---|-------------|-------------|---|
| HIST1H1E  | 2 | 2 | 0.110581831  | -8.627090456 | OK | 0 | 229.9497091 | 0.233257254 | 0 |
| HIST1H2AC | 2 | 2 | 0.187880472  | -8.516907694 | OK | 0 | 177.2708799 | 0.17981758  | 0 |
| HIST1H2AG | 2 | 2 | 0.108157054  | -8.632150652 | OK | 0 | 308.5419311 | 0.312967688 | 0 |
| HIST1H2BC | 2 | 2 | 0.111142234  | -8.626455785 | OK | 0 | 183.31419   | 0.18594093  | 0 |
| HIST1H3B  | 2 | 2 | 0.123162225  | -8.601028444 | OK | 0 | 388.4850417 | 0.394043177 | 0 |
| HIST1H3D  | 2 | 2 | 0.096465961  | -8.64129305  | OK | 0 | 281.4909056 | 0.285528032 | 0 |
| HIST1H3G  | 2 | 2 | 0.083851353  | -8.65212536  | OK | 0 | 343.3052112 | 0.348208081 | 0 |
| HIST1H4C  | 2 | 2 | 0.077952698  | -8.66427374  | OK | 0 | 330.5816847 | 0.335344011 | 0 |
| HIST2H2AC | 2 | 2 | 0.103010551  | -8.651292326 | OK | 0 | 184.0538168 | 0.186696979 | 0 |
| HSPH1     | 2 | 2 | -3.67821525  | -5.328660609 | OK | 0 | 186.3407804 | 0.189020214 | 0 |
| LIG1      | 2 | 2 | -4.11584638  | -6.018011333 | OK | 0 | 237.5323514 | 0.240941803 | 0 |
| LMNB1     | 2 | 2 | -4.492936357 | -5.562939645 | OK | 0 | 393.3574489 | 0.399018086 | 0 |
| MCM3      | 2 | 2 | -3.465010389 | -6.071926119 | OK | 0 | 309.7711593 | 0.314229662 | 0 |
| MCM4      | 2 | 2 | -3.668562158 | -5.677072407 | OK | 0 | 240.3590917 | 0.243816915 | 0 |
| MCM5      | 2 | 2 | -3.444336637 | -6.189079525 | OK | 0 | 287.4815364 | 0.29161554  | 0 |
| MCM6      | 2 | 2 | -3.474766954 | -6.032500984 | OK | 0 | 280.9989135 | 0.285035061 | 0 |
| MCM7      | 2 | 2 | -3.525834307 | -6.165759803 | OK | 0 | 354.8152696 | 0.359922284 | 0 |
| MELK      | 2 | 2 | -5.142827257 | -5.781885864 | OK | 0 | 259.7973015 | 0.263522647 | 0 |
| MND1      | 2 | 2 | -4.778887972 | -6.44415784  | OK | 0 | 321.7540889 | 0.32636724  | 0 |
| MNS1      | 2 | 2 | -4.75841163  | -6.368891002 | OK | 0 | 303.8454906 | 0.308196247 | 0 |
| MSH6      | 2 | 2 | -3.559077009 | -5.851916076 | OK | 0 | 223.4767841 | 0.226689011 | 0 |
| MYBL2     | 2 | 2 | -4.730783685 | -6.089763166 | OK | 0 | 330.5514179 | 0.335288675 | 0 |
| NASP      | 2 | 2 | -3.600200876 | -6.051672699 | OK | 0 | 322.7272722 | 0.327376761 | 0 |
| NCAPD3    | 2 | 2 | -4.551370367 | -5.688102485 | OK | 0 | 246.7831849 | 0.25032704  | 0 |
| NCAPG2    | 2 | 2 | -4.677098974 | -5.685850503 | OK | 0 | 256.4721136 | 0.260147903 | 0 |
| ORC6      | 2 | 2 | -4.097230657 | -6.138351919 | OK | 0 | 363.8643327 | 0.369093654 | 0 |
| PCLAF     | 2 | 2 | -4.957095369 | -6.527775289 | OK | 0 | 448.9176111 | 0.455385143 | 0 |
| PCNA      | 2 | 2 | -3.632495149 | -6.166114093 | OK | 0 | 320.7812437 | 0.325401937 | 0 |
| PKMYT1    | 2 | 2 | -4.581706747 | -6.203773023 | OK | 0 | 315.0700891 | 0.319583693 | 0 |
| PPIF      | 2 | 2 | -3.486112818 | -6.156327726 | OK | 0 | 120.3496948 | 0.122074771 | 0 |
| PSIP1     | 2 | 2 | -3.757222875 | -6.017235519 | OK | 0 | 316.7354083 | 0.321295216 | 0 |
| RAD51AP1  | 2 | 2 | -4.81257604  | -6.327401163 | OK | 0 | 345.7551801 | 0.350715451 | 0 |
| RECQL     | 2 | 2 | -3.741874918 | -5.677526476 | OK | 0 | 128.7470146 | 0.130592743 | 0 |
| RFC3      | 2 | 2 | -3.862555727 | -5.996248724 | OK | 0 | 202.5201102 | 0.205418977 | 0 |
| RIF1      | 2 | 2 | -3.734000429 | -5.479385258 | OK | 0 | 203.6023775 | 0.206530179 | 0 |
| RRM1      | 2 | 2 | -4.059862837 | -5.817682268 | OK | 0 | 281.6875114 | 0.285742545 | 0 |
| RRM2      | 2 | 2 | -4.812541708 | -6.0115335   | OK | 0 | 477.6199408 | 0.484494517 | 0 |
| SLC20A1   | 2 | 2 | -4.178829893 | -5.669030072 | OK | 0 | 113.0806074 | 0.114698065 | 0 |
| SMC1A     | 2 | 2 | -3.785370096 | -5.439705254 | OK | 0 | 208.891864  | 0.211896333 | 0 |
| SMC2      | 2 | 2 | -4.432421907 | -5.700499059 | OK | 0 | 351.0626718 | 0.356119374 | 0 |
| TCOF1     | 2 | 2 | -3.82350181  | -5.511555077 | OK | 0 | 197.243147  | 0.200074937 | 0 |
| TK1       | 2 | 2 | -4.888381704 | -6.520418407 | OK | 0 | 432.2123114 | 0.438437922 | 0 |
| TMEM106C  | 2 | 2 | -4.825308069 | -6.505574228 | OK | 0 | 220.6734587 | 0.223848049 | 0 |
| TMPO      | 2 | 2 | -4.541800245 | -5.503974678 | OK | 0 | 294.0909353 | 0.298326686 | 0 |
| TYMS      | 2 | 2 | -4.602869734 | -6.357121946 | OK | 0 | 466.8802178 | 0.473601802 | 0 |
| UBE2T     | 2 | 2 | -5.241653665 | -6.156429769 | OK | 0 | 350.8187575 | 0.355865515 | 0 |
| WDR76     | 2 | 2 | -3.752479299 | -5.981121542 | OK | 0 | 237.6101167 | 0.241014802 | 0 |
| ZWINT     | 2 | 2 | -4.903456434 | -6.489760877 | OK | 0 | 347.7647229 | 0.352767629 | 0 |
| ANLN      | 3 | 2 | -6.648049578 | -5.714152695 | OK | 0 | 475.0182829 | 0.481849672 | 0 |
| ANP32E    | 3 | 2 | -6.73941873  | -6.172750475 | OK | 0 | 250.3710827 | 0.253974298 | 0 |
| ARHGAP11A | 3 | 2 | -6.777717813 | -5.838612081 | OK | 0 | 324.5657833 | 0.329220512 | 0 |
| ARL6IP1   | 3 | 2 | -6.589393839 | -6.875190975 | OK | 0 | 225.2103818 | 0.228451188 | 0 |
| ASPM      | 3 | 2 | -7.028236135 | -6.294601919 | OK | 0 | 518.3509325 | 0.525807504 | 0 |
| AURKA     | 3 | 2 | -7.268601641 | -5.791764261 | OK | 0 | 334.7481773 | 0.339551524 | 0 |
| AURKB     | 3 | 2 | -6.967200979 | -5.388160946 | OK | 0 | 402.6692237 | 0.408447032 | 0 |
| BIRC5     | 3 | 2 | -6.51559852  | -6.716683151 | OK | 0 | 477.3368896 | 0.484209069 | 0 |
| BUB1      | 3 | 2 | -7.06103681  | -6.225082876 | OK | 0 | 380.6895813 | 0.386139402 | 0 |
| BUB1B     | 3 | 2 | -6.433765634 | -5.488328458 | OK | 0 | 354.5448231 | 0.359622181 | 0 |
| CCNA2     | 3 | 2 | -6.798074468 | -5.643153073 | OK | 0 | 488.430511  | 0.495452876 | 0 |
| CCNB1     | 3 | 2 | -6.612406477 | -6.834413053 | OK | 0 | 419.4382514 | 0.425475142 | 0 |
| CCNB2     | 3 | 2 | -6.590443357 | -6.824827911 | OK | 0 | 427.368051  | 0.433512858 | 0 |
| CDC20     | 3 | 2 | -6.623996958 | -6.819634916 | OK | 0 | 440.6831851 | 0.447020122 | 0 |
| CDCA3     | 3 | 2 | -7.240159258 | -5.748948337 | OK | 0 | 379.5626451 | 0.385006021 | 0 |
| CDCA8     | 3 | 2 | -7.095297083 | -5.58951986  | OK | 0 | 398.6056673 | 0.404322532 | 0 |
| CDK1      | 3 | 2 | -6.301931127 | -5.387701513 | OK | 0 | 456.769362  | 0.463341824 | 0 |
| CDKN3     | 3 | 2 | -6.58290027  | -6.838282587 | OK | 0 | 449.2620406 | 0.455724218 | 0 |
| CENPA     | 3 | 2 | -7.288852915 | -6.132091047 | OK | 0 | 428.3067258 | 0.434441798 | 0 |
| CENPE     | 3 | 2 | -7.096781    | -6.299931528 | OK | 0 | 450.2198086 | 0.456690091 | 0 |
| CENPF     | 3 | 2 | -6.81276296  | -6.486492159 | OK | 0 | 508.4613173 | 0.515783687 | 0 |
| CENPN     | 3 | 2 | -6.086987718 | -6.710673095 | OK | 0 | 265.6445725 | 0.269459926 | 0 |
| CENPW     | 3 | 2 | -6.137951597 | -6.794540645 | OK | 0 | 410.6286908 | 0.416545617 | 0 |
| CEP55     | 3 | 2 | -6.93303512  | -6.358020784 | OK | 0 | 488.8382505 | 0.495862664 | 0 |
| CKAP2     | 3 | 2 | -7.071952089 | -5.882383348 | OK | 0 | 273.5440429 | 0.277480308 | 0 |

|            |   |   |              |              |    |           |             |             |           |
|------------|---|---|--------------|--------------|----|-----------|-------------|-------------|-----------|
| CKAP2L     | 3 | 2 | -6.44093202  | -5.345185162 | OK | 0         | 394.9006833 | 0.400563152 | 0         |
| CKAP5      | 3 | 2 | -6.926187261 | -6.093642236 | OK | 0         | 173.8331852 | 0.176327414 | 0         |
| CKS1B      | 3 | 2 | -5.841136678 | -6.277043344 | OK | 0         | 315.6493946 | 0.320196158 | 0         |
| CKS2       | 3 | 2 | -7.375025018 | -6.045836212 | OK | 0         | 265.0567637 | 0.268872725 | 0         |
| DBF4       | 3 | 2 | -6.547476515 | -5.658339383 | OK | 0         | 220.4418124 | 0.223608834 | 0         |
| DDX39A     | 3 | 2 | -6.257055506 | -6.820527794 | OK | 0         | 233.5166373 | 0.236876163 | 0         |
| DEPDC1     | 3 | 2 | -7.024569258 | -5.820917846 | OK | 0         | 429.0195123 | 0.435177035 | 0         |
| DIAPH3     | 3 | 2 | -6.103458627 | -5.513811351 | OK | 0         | 383.3640675 | 0.388864589 | 0         |
| DLGAP5     | 3 | 2 | -7.136504396 | -6.334923031 | OK | 0         | 509.9364777 | 0.517260648 | 0         |
| DTYMK      | 3 | 2 | -6.040547117 | -6.675614597 | OK | 0         | 288.3997887 | 0.292551862 | 0         |
| ECT2       | 3 | 2 | -6.868090376 | -6.169924022 | OK | 0         | 296.345316  | 0.300606054 | 0         |
| FAM83D     | 3 | 2 | -7.374053224 | -5.938319446 | OK | 0         | 178.0695124 | 0.180627389 | 0         |
| FOXM1      | 3 | 2 | -6.520667776 | -5.68304825  | OK | 0         | 270.2818502 | 0.274153927 | 0         |
| GTSE1      | 3 | 2 | -7.221380457 | -5.758037092 | OK | 0         | 459.0597043 | 0.46564352  | 0         |
| H2AFX      | 3 | 2 | -6.286169275 | -5.266152383 | OK | 0         | 263.2412019 | 0.267029414 | 0         |
| H2AFZ      | 3 | 2 | -6.008220419 | -6.787251474 | OK | 0         | 338.9789411 | 0.343861623 | 0         |
| HJURP      | 3 | 2 | -6.466233    | -5.389489652 | OK | 0         | 334.6720879 | 0.339459107 | 0         |
| HMGB2      | 3 | 2 | -5.926471456 | -5.909514429 | OK | 0         | 345.8882459 | 0.350872337 | 0         |
| HMGB3      | 3 | 2 | -6.373661264 | -6.787762882 | OK | 0         | 237.7025782 | 0.241122218 | 0         |
| HMMR       | 3 | 2 | -7.171529039 | -6.263320924 | OK | 0         | 498.1264527 | 0.505282954 | 0         |
| KIF11      | 3 | 2 | -6.3515179   | -5.559972407 | OK | 0         | 381.813916  | 0.387305332 | 0         |
| KIF20B     | 3 | 2 | -6.944953188 | -6.160136463 | OK | 0         | 377.0758759 | 0.382501862 | 0         |
| KIF23      | 3 | 2 | -7.137694582 | -5.703711869 | OK | 0         | 443.0448743 | 0.449400458 | 0         |
| KIF2C      | 3 | 2 | -6.999280676 | -5.816839697 | OK | 0         | 400.3925918 | 0.406130444 | 0         |
| KIFC1      | 3 | 2 | -6.399281248 | -5.354016544 | OK | 0         | 356.6972792 | 0.361812066 | 0         |
| KNL1       | 3 | 2 | -6.758521303 | -5.885560514 | OK | 0         | 424.8288366 | 0.430925865 | 0         |
| KNSTRN     | 3 | 2 | -7.357202753 | -6.137953998 | OK | 0         | 257.8392919 | 0.261533794 | 0         |
| KPNA2      | 3 | 2 | -7.380627855 | -6.06981969  | OK | 0         | 318.2757918 | 0.322855713 | 0         |
| LMNB2      | 3 | 2 | -6.621737703 | -5.829898836 | OK | 0         | 244.4724342 | 0.247986341 | 0         |
| MAD2L1     | 3 | 2 | -5.760776743 | -6.289104225 | OK | 0         | 414.4505642 | 0.420416252 | 0         |
| MKI67      | 3 | 2 | -6.593795522 | -5.804621221 | OK | 0         | 526.9579538 | 0.53454879  | 0         |
| MXD3       | 3 | 2 | -7.073845609 | -5.519011857 | OK | 0         | 290.628833  | 0.294788936 | 0         |
| NCAPD2     | 3 | 2 | -6.687580332 | -6.022724153 | OK | 0         | 245.3189966 | 0.248841529 | 0         |
| NCAPG      | 3 | 2 | -6.390696272 | -5.46391225  | OK | 0         | 408.6318355 | 0.414496461 | 0         |
| NDC80      | 3 | 2 | -6.377324327 | -5.320534469 | OK | 0         | 404.7600497 | 0.410566063 | 0         |
| NUF2       | 3 | 2 | -6.949828848 | -5.769080998 | OK | 0         | 462.6247398 | 0.469268259 | 0         |
| NUSAP1     | 3 | 2 | -6.496127828 | -5.388550283 | OK | 0         | 516.8984844 | 0.524342178 | 0         |
| PBK        | 3 | 2 | -6.360498651 | -5.340116145 | OK | 0         | 478.6983939 | 0.485577757 | 0         |
| PHF19      | 3 | 2 | -6.142628893 | -6.6771369   | OK | 0         | 241.2201096 | 0.244688147 | 0         |
| PLK1       | 3 | 2 | -7.373345598 | -6.021597387 | OK | 0         | 415.7317079 | 0.421690451 | 0         |
| PRC1       | 3 | 2 | -6.78877376  | -5.697126629 | OK | 0         | 505.0432295 | 0.512314444 | 0         |
| PRR11      | 3 | 2 | -7.028197511 | -6.392035963 | OK | 0         | 317.0958097 | 0.321633075 | 0         |
| PTTG1      | 3 | 2 | -6.300870642 | -6.882250311 | OK | 0         | 389.5862866 | 0.395201744 | 0         |
| RACGAP1    | 3 | 2 | -6.878368601 | -5.820924999 | OK | 0         | 265.8963449 | 0.269714191 | 0         |
| SAP30      | 3 | 2 | -6.628558382 | -5.382044079 | OK | 0         | 197.6123397 | 0.20045162  | 0         |
| SGO1       | 3 | 2 | -6.403075441 | -5.543348433 | OK | 0         | 382.9713219 | 0.38846642  | 0         |
| SGO2       | 3 | 2 | -7.080720171 | -5.92029071  | OK | 0         | 380.4967547 | 0.385960121 | 0         |
| SMC4       | 3 | 2 | -6.675787672 | -5.87640238  | OK | 0         | 306.5606786 | 0.31097631  | 0         |
| SPC25      | 3 | 2 | -6.340055212 | -5.341148497 | OK | 0         | 383.6302199 | 0.389128815 | 0         |
| SPDL1      | 3 | 2 | -6.872765764 | -5.842988969 | OK | 0         | 162.0347877 | 0.164354662 | 0         |
| STMN1      | 3 | 2 | -5.824393019 | -6.720142843 | OK | 0         | 471.9225507 | 0.478726733 | 0         |
| TACC3      | 3 | 2 | -6.438571199 | -5.421845438 | OK | 0         | 372.5025199 | 0.377849588 | 0         |
| TOP2A      | 3 | 2 | -6.928583368 | -5.701792719 | OK | 0         | 513.486736  | 0.520879003 | 0         |
| TPX2       | 3 | 2 | -6.835941061 | -5.7866807   | OK | 0         | 506.3080196 | 0.513596154 | 0         |
| TROAP      | 3 | 2 | -6.525570616 | -6.871572258 | OK | 0         | 288.1826309 | 0.292315512 | 0         |
| TTK        | 3 | 2 | -6.795947775 | -5.780751468 | OK | 0         | 396.9420042 | 0.402639219 | 0         |
| TUBA1B     | 3 | 2 | -5.956985697 | -6.755624057 | OK | 0         | 321.286051  | 0.325913918 | 0         |
| TUBB       | 3 | 2 | -5.638810381 | -6.600142481 | OK | 0         | 298.4346713 | 0.302733052 | 0         |
| UBE2C      | 3 | 2 | -7.237405046 | -5.704974176 | OK | 0         | 441.0608542 | 0.447406164 | 0         |
| UBE2S      | 3 | 2 | -7.350721582 | -5.938884498 | OK | 0         | 200.7814907 | 0.203669475 | 0         |
| A2ML1      | 4 | 1 | 1.891713277  | -0.120636465 | OK | 0         | 578.0125791 | 0.586349872 | 0         |
| A4GALT     | 4 | 1 | 0.016242102  | 0.500440596  | OK | 0         | 285.3128117 | 0.289413993 | 0         |
| AC005532.1 | 4 | 1 | 2.78548576   | 1.009047983  | OK | 0         | 280.409881  | 0.284418872 | 0         |
| AC008397.1 | 4 | 1 | 0.830541004  | 1.249374388  | OK | 0         | 143.2849463 | 0.145339239 | 0         |
| AC068587.4 | 4 | 1 | 0.675012976  | 1.432837008  | OK | 0         | 196.7178579 | 0.199541358 | 0         |
| ACPP       | 4 | 1 | 2.342656032  | 0.278525828  | OK | 0         | 199.6201526 | 0.202486993 | 0         |
| AGR2       | 4 | 1 | 2.474897281  | 1.620139597  | OK | 8.10E-113 | 22.54169602 | 0.022852451 | 8.14E-113 |
| AIFM2      | 4 | 1 | 2.378798023  | 2.13858795   | OK | 0         | 100.4310324 | 0.101864991 | 0         |
| AKR1B10    | 4 | 1 | 2.818512574  | -0.774807216 | OK | 0         | 225.3844686 | 0.228625234 | 0         |
| AKR1C1     | 4 | 1 | 2.833771483  | -0.828878404 | OK | 0         | 84.04776588 | 0.085246431 | 0         |
| AKR1C2     | 4 | 1 | 2.859662071  | -0.8199389   | OK | 0         | 107.320345  | 0.10885511  | 0         |
| AKR1C3     | 4 | 1 | 2.872497455  | -0.799954893 | OK | 0         | 115.1200906 | 0.116766073 | 0         |
| AL355312.4 | 4 | 1 | 2.920897022  | 2.806670187  | OK | 0         | 164.3823196 | 0.166712337 | 0         |

|          |   |   |              |              |    |   |             |             |   |
|----------|---|---|--------------|--------------|----|---|-------------|-------------|---|
| ALDH1A1  | 4 | 1 | 1.694270984  | -0.671384813 | OK | 0 | 166.3984131 | 0.168780078 | 0 |
| ALDH3B2  | 4 | 1 | 0.922371399  | 0.048130034  | OK | 0 | 343.2903912 | 0.348234824 | 0 |
| ALOX12   | 4 | 1 | 2.88248469   | 1.174239634  | OK | 0 | 235.8135734 | 0.239172918 | 0 |
| ALOX15B  | 4 | 1 | 2.391708032  | -0.474366905 | OK | 0 | 68.19855221 | 0.069166303 | 0 |
| ANKRD35  | 4 | 1 | 2.310582772  | -0.383000614 | OK | 0 | 145.9227264 | 0.148013409 | 0 |
| ANXA1    | 4 | 1 | 2.045872585  | 1.193990706  | OK | 0 | 250.8113796 | 0.254392244 | 0 |
| ANXA3    | 4 | 1 | 0.921872147  | 0.816580771  | OK | 0 | 380.7749084 | 0.386262547 | 0 |
| ASPG     | 4 | 1 | 1.754521981  | 1.836862562  | OK | 0 | 436.7374864 | 0.443032521 | 0 |
| ATP13A4  | 4 | 1 | 0.249626294  | 0.977228163  | OK | 0 | 259.4040441 | 0.263128117 | 0 |
| ATP1B1   | 4 | 1 | 1.334709123  | 0.925743578  | OK | 0 | 286.7203277 | 0.290850006 | 0 |
| BEX4     | 4 | 1 | 2.877670423  | 1.555563448  | OK | 0 | 131.258638  | 0.133140826 | 0 |
| BICDL2   | 4 | 1 | 1.032992796  | 1.797529219  | OK | 0 | 418.8785116 | 0.424916145 | 0 |
| BNIP3    | 4 | 1 | 2.943675295  | 1.725236414  | OK | 0 | 216.0187422 | 0.219118728 | 0 |
| C10orf99 | 4 | 1 | 2.477624074  | -0.382632496 | OK | 0 | 300.3851886 | 0.30470966  | 0 |
| C15orf48 | 4 | 1 | 2.983681694  | 2.792490004  | OK | 0 | 499.9754921 | 0.507173773 | 0 |
| C4orf3   | 4 | 1 | 2.075654403  | 1.675032614  | OK | 0 | 349.1688992 | 0.354198213 | 0 |
| C8orf82  | 4 | 1 | 2.740573541  | -0.103051426 | OK | 0 | 129.4587772 | 0.131316005 | 0 |
| CALB2    | 4 | 1 | 2.740789906  | 2.808746813  | OK | 0 | 230.5555349 | 0.233783494 | 0 |
| CALML5   | 4 | 1 | 1.214829371  | 1.378087996  | OK | 0 | 329.1750199 | 0.333913761 | 0 |
| CAPN14   | 4 | 1 | 0.013118998  | 0.054205893  | OK | 0 | 428.6675591 | 0.434848227 | 0 |
| CASTOR1  | 4 | 1 | 2.523007528  | 0.100628851  | OK | 0 | 217.3463446 | 0.220467274 | 0 |
| CBR3     | 4 | 1 | 2.661850826  | -0.336713554 | OK | 0 | 226.9621347 | 0.230228449 | 0 |
| CCNYL1   | 4 | 1 | 2.590217487  | 2.890558241  | OK | 0 | 88.93180731 | 0.09019631  | 0 |
| CD24     | 4 | 1 | 1.88766791   | 1.186091898  | OK | 0 | 620.4954414 | 0.629444398 | 0 |
| CDA      | 4 | 1 | 2.855691091  | 1.064485071  | OK | 0 | 294.1648014 | 0.298380794 | 0 |
| CDH26    | 4 | 1 | 0.053598539  | 0.601023196  | OK | 0 | 532.2038556 | 0.539873649 | 0 |
| CEACAM1  | 4 | 1 | 0.515894607  | 1.404805659  | OK | 0 | 320.9092895 | 0.325516697 | 0 |
| CEACAM5  | 4 | 1 | 0.372260944  | 1.135502814  | OK | 0 | 568.2811714 | 0.576472267 | 0 |
| CEACAM6  | 4 | 1 | 0.283144251  | 1.206619261  | OK | 0 | 452.4860501 | 0.45900734  | 0 |
| CES1     | 4 | 1 | 2.360600368  | -0.429948332 | OK | 0 | 246.4902038 | 0.250017345 | 0 |
| CFD      | 4 | 1 | 1.187712506  | 1.825720785  | OK | 0 | 122.640353  | 0.124398921 | 0 |
| CGN      | 4 | 1 | 0.209066883  | 0.820115565  | OK | 0 | 194.8267738 | 0.197618967 | 0 |
| CITED4   | 4 | 1 | 2.740355984  | -0.243822338 | OK | 0 | 325.7651487 | 0.33045872  | 0 |
| CLCA4    | 4 | 1 | 0.761373394  | 0.817988871  | OK | 0 | 482.5257374 | 0.489482999 | 0 |
| CLDN10   | 4 | 1 | 2.529442683  | 2.208148478  | OK | 0 | 250.1852554 | 0.253675351 | 0 |
| CLIC3    | 4 | 1 | 1.230176911  | 1.439811228  | OK | 0 | 614.1757048 | 0.623036612 | 0 |
| CNFN     | 4 | 1 | 2.98389031   | 2.639574526  | OK | 0 | 409.1930547 | 0.415089104 | 0 |
| CNN3     | 4 | 1 | 2.288358704  | 0.575354098  | OK | 0 | 357.4356518 | 0.362585813 | 0 |
| COX7A1   | 4 | 1 | 2.974779621  | 3.300049303  | OK | 0 | 40.77811439 | 0.041349314 | 0 |
| CPVL     | 4 | 1 | 1.721601025  | -0.703951599 | OK | 0 | 100.6883141 | 0.102125067 | 0 |
| CRCT1    | 4 | 1 | 3.082562939  | 2.963946818  | OK | 0 | 534.7643131 | 0.542462813 | 0 |
| CRISP3   | 4 | 1 | 2.897492186  | 2.875373362  | OK | 0 | 735.9159145 | 0.7464386   | 0 |
| CRNN     | 4 | 1 | 2.821413413  | 1.232228278  | OK | 0 | 654.9954888 | 0.664442004 | 0 |
| CRYAB    | 4 | 1 | 2.911975161  | 1.436168192  | OK | 0 | 233.3577469 | 0.236711137 | 0 |
| CST3     | 4 | 1 | 1.679118053  | 1.14290428   | OK | 0 | 226.8616732 | 0.230121189 | 0 |
| CST6     | 4 | 1 | 2.639604107  | 2.887928007  | OK | 0 | 511.3496995 | 0.518695673 | 0 |
| CSTA     | 4 | 1 | 2.129539744  | 1.450359343  | OK | 0 | 337.1288839 | 0.341971213 | 0 |
| CSTB     | 4 | 1 | 2.192768947  | 1.327327727  | OK | 0 | 319.268586  | 0.323840315 | 0 |
| CTNNBIP1 | 4 | 1 | 2.674344794  | -0.175788881 | OK | 0 | 319.16856   | 0.323766695 | 0 |
| CTTNBP2  | 4 | 1 | 1.952348367  | -0.34841633  | OK | 0 | 341.4477042 | 0.346364698 | 0 |
| CWH43    | 4 | 1 | 2.460269347  | 0.201596258  | OK | 0 | 285.178642  | 0.289265824 | 0 |
| CXCL17   | 4 | 1 | 0.921782557  | 1.222795962  | OK | 0 | 477.262265  | 0.484144516 | 0 |
| CXXC5    | 4 | 1 | 0.79262969   | 1.69540882   | OK | 0 | 230.1887361 | 0.233499427 | 0 |
| CYP2C18  | 4 | 1 | 1.678719238  | -0.164933921 | OK | 0 | 187.6605934 | 0.190352943 | 0 |
| CYP4B1   | 4 | 1 | 1.47916241   | -0.636459829 | OK | 0 | 267.3179709 | 0.271165681 | 0 |
| CYP51A1  | 4 | 1 | -0.950810059 | 0.937862395  | OK | 0 | 198.7919872 | 0.20165127  | 0 |
| CYSRT1   | 4 | 1 | 1.584583656  | 2.066393374  | OK | 0 | 625.8978119 | 0.634925839 | 0 |
| DDAH2    | 4 | 1 | 0.487227277  | 0.875252245  | OK | 0 | 209.6080141 | 0.212622787 | 0 |
| DEFB1    | 4 | 1 | 1.550190524  | -0.672664644 | OK | 0 | 305.7592893 | 0.310163766 | 0 |
| DEGS2    | 4 | 1 | 2.481653825  | -0.1639874   | OK | 0 | 370.6941318 | 0.376030087 | 0 |
| DIO2     | 4 | 1 | 0.314949886  | 1.053826331  | OK | 0 | 444.5257296 | 0.450923741 | 0 |
| DMKN     | 4 | 1 | 1.002553598  | 1.290452956  | OK | 0 | 417.0286926 | 0.423040556 | 0 |
| DNASE1L3 | 4 | 1 | 2.687181011  | -0.693595173 | OK | 0 | 60.31481784 | 0.061170329 | 0 |
| DSC2     | 4 | 1 | 1.595102743  | -0.392863037 | OK | 0 | 493.7029115 | 0.500821855 | 0 |
| DSG1     | 4 | 1 | 2.346274987  | -0.184188368 | OK | 0 | 214.1713862 | 0.217209757 | 0 |
| DYNLT3   | 4 | 1 | 1.464370028  | 0.097176073  | OK | 0 | 459.416003  | 0.466040665 | 0 |
| ECM1     | 4 | 1 | 3.085807577  | 2.952061175  | OK | 0 | 518.096523  | 0.525563313 | 0 |
| EGLN3    | 4 | 1 | 0.061429218  | 0.815330504  | OK | 0 | 245.6607025 | 0.24919467  | 0 |
| EHD3     | 4 | 1 | 0.093974367  | 1.610520838  | OK | 0 | 191.7791492 | 0.194533193 | 0 |
| ELL2     | 4 | 1 | 1.705955402  | -0.297456505 | OK | 0 | 209.4195313 | 0.21243179  | 0 |
| ELOVL4   | 4 | 1 | 0.739471227  | 0.677093504  | OK | 0 | 223.2936189 | 0.226502083 | 0 |
| EMP1     | 4 | 1 | 2.829419986  | 2.286886214  | OK | 0 | 443.7120214 | 0.450108244 | 0 |
| ENDOU    | 4 | 1 | 2.54721512   | 0.610316275  | OK | 0 | 334.4786733 | 0.339278169 | 0 |

|           |   |   |              |              |    |   |             |             |   |
|-----------|---|---|--------------|--------------|----|---|-------------|-------------|---|
| EPB41L3   | 4 | 1 | 2.862268821  | 1.611585139  | OK | 0 | 257.5623751 | 0.261211827 | 0 |
| EPHX3     | 4 | 1 | 1.341057495  | 1.161260126  | OK | 0 | 291.4868824 | 0.29568367  | 0 |
| EREG      | 4 | 1 | 2.331188337  | 1.988231657  | OK | 0 | 235.7198365 | 0.239058113 | 0 |
| ETNK2     | 4 | 1 | 2.509976045  | -0.274088384 | OK | 0 | 134.7491731 | 0.136673225 | 0 |
| EVPL      | 4 | 1 | 0.337948219  | 0.063773154  | OK | 0 | 378.3322097 | 0.383785382 | 0 |
| F3        | 4 | 1 | 2.918667093  | 1.333381651  | OK | 0 | 114.480609  | 0.116096671 | 0 |
| FAM25A    | 4 | 1 | 2.948396937  | 3.376667021  | OK | 0 | 608.867759  | 0.61761339  | 0 |
| FAM3B     | 4 | 1 | 0.796358824  | 0.809432505  | OK | 0 | 584.4285613 | 0.592859181 | 0 |
| FAM3D     | 4 | 1 | 2.300568596  | 1.917214392  | OK | 0 | 663.9994596 | 0.673563586 | 0 |
| FAM83A    | 4 | 1 | 0.172454015  | 1.219733237  | OK | 0 | 286.1997994 | 0.290319907 | 0 |
| FETUB     | 4 | 1 | 0.283221856  | 0.810892104  | OK | 0 | 475.6023852 | 0.482432717 | 0 |
| FGF11     | 4 | 1 | -0.058230265 | 0.448318957  | OK | 0 | 155.6722978 | 0.157901843 | 0 |
| FGFBP1    | 4 | 1 | -0.965856775 | 0.937648772  | OK | 0 | 309.3057201 | 0.313761821 | 0 |
| FMQ2      | 4 | 1 | -0.152447089 | 0.761231898  | OK | 0 | 177.0366765 | 0.179580852 | 0 |
| FNDC4     | 4 | 1 | 2.759022371  | 2.182997702  | OK | 0 | 306.9385248 | 0.311293474 | 0 |
| FUOM      | 4 | 1 | 1.061342136  | 1.679071902  | OK | 0 | 103.8095339 | 0.105295568 | 0 |
| GABRP     | 4 | 1 | 0.087931052  | 0.24921131   | OK | 0 | 375.323666  | 0.380732484 | 0 |
| GADD45G   | 4 | 1 | 2.479283706  | -0.259688856 | OK | 0 | 98.44566144 | 0.099849516 | 0 |
| GBP6      | 4 | 1 | 1.611602858  | -0.215933563 | OK | 0 | 512.5143507 | 0.519903975 | 0 |
| GCNT3     | 4 | 1 | 0.260955468  | 0.952297686  | OK | 0 | 404.6933837 | 0.410508647 | 0 |
| GDPD3     | 4 | 1 | 2.593174473  | 0.719751356  | OK | 0 | 469.1828156 | 0.47593696  | 0 |
| GJB2      | 4 | 1 | 1.371929959  | 0.681958197  | OK | 0 | 355.6477572 | 0.360773205 | 0 |
| GJB6      | 4 | 1 | 1.207641379  | 0.704520701  | OK | 0 | 402.2779436 | 0.408076588 | 0 |
| GLTP      | 4 | 1 | 1.380558357  | 0.891863345  | OK | 0 | 304.6894249 | 0.309077658 | 0 |
| GNG4      | 4 | 1 | 2.075480357  | 1.869416712  | OK | 0 | 431.5150323 | 0.437704767 | 0 |
| GPR160    | 4 | 1 | 0.062666372  | 0.886410712  | OK | 0 | 167.3407471 | 0.169732357 | 0 |
| GPX2      | 4 | 1 | 2.793054715  | -0.808768989 | OK | 0 | 133.2438973 | 0.135154468 | 0 |
| GPX3      | 4 | 1 | 2.613265649  | 0.909512041  | OK | 0 | 283.5345129 | 0.287605313 | 0 |
| GRHL3     | 4 | 1 | 1.211949841  | -0.140882732 | OK | 0 | 251.2249215 | 0.254839698 | 0 |
| GSN       | 4 | 1 | 1.752858893  | 0.796848296  | OK | 0 | 376.292767  | 0.381714297 | 0 |
| GSTA1     | 4 | 1 | 1.779266194  | -0.627222778 | OK | 0 | 137.3851127 | 0.139339134 | 0 |
| GSTM3     | 4 | 1 | 2.777192608  | -0.850568535 | OK | 0 | 217.7896179 | 0.22092253  | 0 |
| GSTT2B    | 4 | 1 | 2.679171935  | 2.768601893  | OK | 0 | 42.74445998 | 0.043344181 | 0 |
| HIF1A     | 4 | 1 | 1.945037738  | 0.138905524  | OK | 0 | 149.890068  | 0.15204252  | 0 |
| HMGS1     | 4 | 1 | -0.91551946  | 0.911790846  | OK | 0 | 275.885265  | 0.279857904 | 0 |
| HMOX2     | 4 | 1 | 1.807944611  | 2.239630698  | OK | 0 | 215.2434171 | 0.21834002  | 0 |
| HOPX      | 4 | 1 | 2.457014338  | 1.924052714  | OK | 0 | 471.7445903 | 0.47854694  | 0 |
| HPSE      | 4 | 1 | 2.156444327  | 2.156604765  | OK | 0 | 81.75021888 | 0.08291292  | 0 |
| HS3ST1    | 4 | 1 | -0.019545897 | 0.565165995  | OK | 0 | 308.3170718 | 0.312756955 | 0 |
| HSPA1A    | 4 | 1 | 2.025708572  | -0.889182808 | OK | 0 | 220.5169297 | 0.223689294 | 0 |
| HSPA1B    | 4 | 1 | 1.987976924  | -0.835098745 | OK | 0 | 166.0934935 | 0.168480686 | 0 |
| IDI1      | 4 | 1 | -0.993477091 | 0.983612536  | OK | 0 | 154.2160302 | 0.156430856 | 0 |
| IFFO2     | 4 | 1 | 0.368857161  | -0.038939716 | OK | 0 | 285.3620682 | 0.28947023  | 0 |
| IFI35     | 4 | 1 | -0.257952913 | 0.058422564  | OK | 0 | 174.3475072 | 0.176852125 | 0 |
| IGFL1     | 4 | 1 | 2.89848663   | 1.440986632  | OK | 0 | 176.6862462 | 0.179207675 | 0 |
| IL12A-AS1 | 4 | 1 | 2.602432743  | 2.423913     | OK | 0 | 377.3523034 | 0.382700199 | 0 |
| INSIG1    | 4 | 1 | -0.883813008 | 0.945471285  | OK | 0 | 142.6558754 | 0.144701404 | 0 |
| ISG20     | 4 | 1 | 2.134493724  | 1.835484503  | OK | 0 | 260.467267  | 0.264206833 | 0 |
| IVL       | 4 | 1 | 2.328467385  | 0.443246363  | OK | 0 | 548.5438079 | 0.556455175 | 0 |
| KALRN     | 4 | 1 | 0.312571124  | 0.790946959  | OK | 0 | 192.7387168 | 0.195502054 | 0 |
| KCNK7     | 4 | 1 | 2.536251799  | -0.579657795 | OK | 0 | 292.2925825 | 0.296501176 | 0 |
| KIAA1211L | 4 | 1 | 1.704932646  | -0.270336153 | OK | 0 | 173.7964577 | 0.176291552 | 0 |
| KIF21A    | 4 | 1 | 1.416155771  | 0.667404173  | OK | 0 | 240.6225903 | 0.244085453 | 0 |
| KLK10     | 4 | 1 | 0.531004116  | 1.157840727  | OK | 0 | 303.5932559 | 0.307966784 | 0 |
| KLK11     | 4 | 1 | 1.636212066  | 0.60234165   | OK | 0 | 442.831086  | 0.449215493 | 0 |
| KLK12     | 4 | 1 | 0.345472769  | 1.598014353  | OK | 0 | 623.3935802 | 0.623273269 | 0 |
| KLK13     | 4 | 1 | 0.474616066  | 1.37721443   | OK | 0 | 495.5938624 | 0.502740792 | 0 |
| KLK6      | 4 | 1 | 0.396938965  | 1.916517733  | OK | 0 | 157.4716702 | 0.159700176 | 0 |
| KLK7      | 4 | 1 | 0.513064877  | 1.071659087  | OK | 0 | 394.0594654 | 0.399727459 | 0 |
| KLK8      | 4 | 1 | 0.594659612  | 1.212487219  | OK | 0 | 184.9105103 | 0.187568815 | 0 |
| KRT24     | 4 | 1 | 0.51401724   | 1.510684489  | OK | 0 | 279.6687924 | 0.283668688 | 0 |
| KRT4      | 4 | 1 | 1.33734189   | -0.107780458 | OK | 0 | 510.4046644 | 0.517760632 | 0 |
| KRT6A     | 4 | 1 | 2.299380079  | -0.224249126 | OK | 0 | 489.094413  | 0.49614132  | 0 |
| KRT6B     | 4 | 1 | 2.369384781  | -0.192881586 | OK | 0 | 379.5929138 | 0.385063679 | 0 |
| KRT6C     | 4 | 1 | 2.39508988   | -0.196428539 | OK | 0 | 295.7432313 | 0.300000403 | 0 |
| KRT78     | 4 | 1 | 3.040285841  | 3.064028738  | OK | 0 | 676.0771032 | 0.685800214 | 0 |
| KRTDAP    | 4 | 1 | 0.817564123  | 1.374743937  | OK | 0 | 86.4545668  | 0.087676187 | 0 |
| LCN2      | 4 | 1 | 0.287852482  | 2.102612494  | OK | 0 | 406.9989418 | 0.412864953 | 0 |
| LGALS7B   | 4 | 1 | 0.617081628  | -0.052035572 | OK | 0 | 297.1630148 | 0.301437822 | 0 |
| LINC02487 | 4 | 1 | 2.338762537  | 2.180424212  | OK | 0 | 313.4188888 | 0.317835254 | 0 |
| LIPH      | 4 | 1 | 0.696610615  | 1.137707232  | OK | 0 | 328.1725215 | 0.332871327 | 0 |
| LPCAT4    | 4 | 1 | 0.042642609  | 0.442589758  | OK | 0 | 224.577213  | 0.227806447 | 0 |
| LRRRC8A   | 4 | 1 | 0.365402893  | 0.177682875  | OK | 0 | 245.6056258 | 0.249141065 | 0 |

|           |   |   |              |              |    |   |             |             |   |
|-----------|---|---|--------------|--------------|----|---|-------------|-------------|---|
| LY6G6C    | 4 | 1 | 0.562588797  | 1.142948626  | OK | 0 | 270.3565806 | 0.274244555 | 0 |
| LYPD2     | 4 | 1 | 2.941634432  | 2.830833433  | OK | 0 | 625.1571043 | 0.634152565 | 0 |
| LYPD3     | 4 | 1 | 1.610132233  | 0.842330454  | OK | 0 | 476.2371706 | 0.483102607 | 0 |
| MAF       | 4 | 1 | 1.601964787  | -0.427716018 | OK | 0 | 206.0983223 | 0.209063118 | 0 |
| MAFB      | 4 | 1 | 2.128156201  | -0.676138879 | OK | 0 | 232.9020533 | 0.236253847 | 0 |
| MAL       | 4 | 1 | 2.821851627  | 1.165320872  | OK | 0 | 597.542185  | 0.606161367 | 0 |
| MAL2      | 4 | 1 | 1.590066746  | 0.476337908  | OK | 0 | 473.1410088 | 0.479962453 | 0 |
| MBOAT2    | 4 | 1 | 0.428181962  | 0.63414192   | OK | 0 | 367.9772419 | 0.373278308 | 0 |
| ME1       | 4 | 1 | 1.418652252  | 0.551196097  | OK | 0 | 214.381397  | 0.217458054 | 0 |
| MGLL      | 4 | 1 | 2.435696975  | -0.088659765 | OK | 0 | 514.0350502 | 0.521448241 | 0 |
| MGST1     | 4 | 1 | 2.816961662  | -0.860919716 | OK | 0 | 145.4212036 | 0.147509695 | 0 |
| MIR210HG  | 4 | 1 | 2.529174582  | 1.486824988  | OK | 0 | 188.879432  | 0.191590452 | 0 |
| MRDH6     | 4 | 1 | 0.1757188    | 1.771239756  | OK | 0 | 189.8738339 | 0.192598306 | 0 |
| MSMO1     | 4 | 1 | -0.964754924 | 0.951216219  | OK | 0 | 167.6398132 | 0.17004831  | 0 |
| MT1X      | 4 | 1 | 1.249868617  | -0.953428508 | OK | 0 | 419.4349072 | 0.425481502 | 0 |
| MUC15     | 4 | 1 | 1.499438242  | -0.156594278 | OK | 0 | 391.3346429 | 0.396973607 | 0 |
| MUC21     | 4 | 1 | 2.914217488  | 1.21543598   | OK | 0 | 699.7974673 | 0.709878134 | 0 |
| MUC4      | 4 | 1 | 0.076539413  | 0.971407889  | OK | 0 | 241.1563831 | 0.244620728 | 0 |
| MYH14     | 4 | 1 | 0.457549438  | 0.138987063  | OK | 0 | 368.9494007 | 0.374264688 | 0 |
| NAGK      | 4 | 1 | 2.31937565   | 0.31576824   | OK | 0 | 393.0135785 | 0.3986788   | 0 |
| NBEAL2    | 4 | 1 | 0.383789912  | 0.043907402  | OK | 0 | 277.5770228 | 0.281572603 | 0 |
| NDUFA4L2  | 4 | 1 | 2.797015444  | 1.523150919  | OK | 0 | 276.55743   | 0.280534111 | 0 |
| NQO1      | 4 | 1 | 2.80452408   | -0.762233974 | OK | 0 | 235.9907708 | 0.239386545 | 0 |
| NUAK2     | 4 | 1 | 0.500038013  | 0.875808714  | OK | 0 | 134.9488258 | 0.136880176 | 0 |
| NUCB2     | 4 | 1 | 2.366094962  | 0.279266356  | OK | 0 | 442.5090941 | 0.448889253 | 0 |
| NUDT8     | 4 | 1 | 2.78912522   | -0.128304245 | OK | 0 | 362.8969509 | 0.368127035 | 0 |
| OAS1      | 4 | 1 | 1.002851867  | 0.851389407  | OK | 0 | 234.2392558 | 0.237609954 | 0 |
| PALMD     | 4 | 1 | 2.448580161  | 0.162383555  | OK | 0 | 173.6776309 | 0.176173171 | 0 |
| PAQR8     | 4 | 1 | 2.650168554  | 0.643744467  | OK | 0 | 176.6039156 | 0.179127011 | 0 |
| PCDH1     | 4 | 1 | 0.242435232  | 1.470964907  | OK | 0 | 248.4782395 | 0.25204774  | 0 |
| PDLIM2    | 4 | 1 | 2.020938173  | 1.288282393  | OK | 0 | 267.415289  | 0.271266086 | 0 |
| PGD       | 4 | 1 | 0.832945183  | -0.035960676 | OK | 0 | 352.5557302 | 0.357635586 | 0 |
| PHLDB3    | 4 | 1 | 0.859459805  | 1.56955242   | OK | 0 | 104.6262452 | 0.10612277  | 0 |
| PI3       | 4 | 1 | 0.651783243  | 1.354278563  | OK | 0 | 407.2748079 | 0.413141209 | 0 |
| PIM1      | 4 | 1 | 2.146765963  | 1.91542816   | OK | 0 | 263.4145094 | 0.267206758 | 0 |
| PLAC8     | 4 | 1 | 0.144597188  | 0.950612543  | OK | 0 | 419.7971349 | 0.425848322 | 0 |
| PLBD1     | 4 | 1 | 1.078558013  | 1.830584048  | OK | 0 | 281.9677579 | 0.286028024 | 0 |
| PMM1      | 4 | 1 | 2.155951992  | 1.748418806  | OK | 0 | 207.2343136 | 0.210215147 | 0 |
| PPM1K     | 4 | 1 | 1.830320135  | -0.580988409 | OK | 0 | 138.4886736 | 0.140473692 | 0 |
| PPP1R3C   | 4 | 1 | 0.153254465  | 1.80726528   | OK | 0 | 237.4020019 | 0.240802696 | 0 |
| PRSS3     | 4 | 1 | 0.542852387  | 1.180968283  | OK | 0 | 629.5136468 | 0.638585225 | 0 |
| PTGR1     | 4 | 1 | 2.57114257   | -0.548101665 | OK | 0 | 281.6081875 | 0.285663606 | 0 |
| PTN       | 4 | 1 | 1.697821394  | -0.685350181 | OK | 0 | 326.1350535 | 0.330834138 | 0 |
| RAB10     | 4 | 1 | 1.839724854  | 0.852697848  | OK | 0 | 370.9534977 | 0.376298335 | 0 |
| RAET1E    | 4 | 1 | 1.454727665  | 0.269239901  | OK | 0 | 328.9915155 | 0.333726505 | 0 |
| RAET1L    | 4 | 1 | 0.805305049  | 1.064347742  | OK | 0 | 355.554163  | 0.36066827  | 0 |
| RASGRP1   | 4 | 1 | -0.114824518 | 0.029162405  | OK | 0 | 246.8680743 | 0.250418403 | 0 |
| RBP1      | 4 | 1 | 2.246383802  | 1.950140951  | OK | 0 | 66.85399463 | 0.067804417 | 0 |
| RBP7      | 4 | 1 | 2.573333398  | 1.235962389  | OK | 0 | 209.4662368 | 0.212477003 | 0 |
| RHCG      | 4 | 1 | 1.694526151  | 1.07136154   | OK | 0 | 628.5327879 | 0.637593626 | 0 |
| RHOD      | 4 | 1 | 1.926361099  | 1.449175833  | OK | 0 | 296.7577027 | 0.301032408 | 0 |
| RTKN2     | 4 | 1 | 2.170628206  | 2.034021376  | OK | 0 | 206.497866  | 0.209466094 | 0 |
| S100A12   | 4 | 1 | 2.697557107  | 2.427675246  | OK | 0 | 288.4841636 | 0.292621847 | 0 |
| S100A14   | 4 | 1 | 2.043817178  | 1.279992579  | OK | 0 | 107.595503  | 0.109126691 | 0 |
| S100A4    | 4 | 1 | 1.698409871  | 1.330492972  | OK | 0 | 78.06581567 | 0.079180974 | 0 |
| S100A6    | 4 | 1 | 2.08193554   | 1.355507849  | OK | 0 | 175.1576173 | 0.177668345 | 0 |
| S100A7    | 4 | 1 | 0.50630121   | 1.987516402  | OK | 0 | 182.4658658 | 0.185082021 | 0 |
| S100A8    | 4 | 1 | 2.121369497  | -1.022029878 | OK | 0 | 350.5692893 | 0.355614645 | 0 |
| SAMD5     | 4 | 1 | 1.966120139  | -0.293299677 | OK | 0 | 212.2935678 | 0.21533272  | 0 |
| SBSN      | 4 | 1 | 1.093760059  | 1.207814215  | OK | 0 | 506.6516845 | 0.51395684  | 0 |
| SCD       | 4 | 1 | -0.839996084 | 0.86882448   | OK | 0 | 209.145983  | 0.212152866 | 0 |
| SCGB1A1   | 4 | 1 | 1.448552803  | 0.937721251  | OK | 0 | 85.4408255  | 0.086658265 | 0 |
| SCUBE2    | 4 | 1 | 0.044076935  | 0.279218672  | OK | 0 | 170.772135  | 0.173220448 | 0 |
| SDR16C5   | 4 | 1 | 1.681410924  | 0.284152029  | OK | 0 | 386.9208303 | 0.392497552 | 0 |
| SERPINB1  | 4 | 1 | 2.124381438  | 0.752237795  | OK | 0 | 461.2169169 | 0.467864382 | 0 |
| SERPINB11 | 4 | 1 | 2.617615119  | 0.656964777  | OK | 0 | 75.04807329 | 0.07611005  | 0 |
| SERPINB6  | 4 | 1 | 1.261897013  | 1.348103999  | OK | 0 | 302.9232283 | 0.307286883 | 0 |
| SF3B3     | 4 | 1 | 2.726533786  | 1.474830149  | OK | 0 | 169.2326086 | 0.171664326 | 0 |
| SFTA2     | 4 | 1 | 2.847560183  | 2.707776545  | OK | 0 | 484.0419175 | 0.490960506 | 0 |
| SH3GL1    | 4 | 1 | 0.254033223  | 1.882952212  | OK | 0 | 270.8452574 | 0.274745051 | 0 |
| SHROOM3   | 4 | 1 | 2.253305808  | 2.040335177  | OK | 0 | 238.2262222 | 0.241646043 | 0 |
| SLC26A2   | 4 | 1 | 1.112812982  | -0.321353199 | OK | 0 | 257.2039339 | 0.260906123 | 0 |
| SLC35C1   | 4 | 1 | 0.980233729  | 1.880276678  | OK | 0 | 194.9546313 | 0.197755254 | 0 |

|            |   |   |              |              |    |           |             |             |           |
|------------|---|---|--------------|--------------|----|-----------|-------------|-------------|-----------|
| SLPI       | 4 | 1 | 0.859082891  | 1.300873278  | OK | 0         | 544.0574276 | 0.551905039 | 0         |
| SLURP1     | 4 | 1 | 2.829994098  | 1.155082701  | OK | 0         | 594.8192823 | 0.603391556 | 0         |
| SMAGP      | 4 | 1 | 1.520575122  | 1.925748347  | OK | 0         | 349.3645672 | 0.354398742 | 0         |
| SMIM5      | 4 | 1 | 1.426347867  | 1.57780218   | OK | 0         | 487.5480726 | 0.494576609 | 0         |
| SNX31      | 4 | 1 | 0.590559558  | 0.757567404  | OK | 0         | 219.0628636 | 0.222205127 | 0         |
| SPAG17     | 4 | 1 | 1.73723884   | -0.269332887 | OK | 0         | 227.284024  | 0.23054945  | 0         |
| SPINK5     | 4 | 1 | 1.724913255  | 0.030583618  | OK | 0         | 579.7515218 | 0.588112212 | 0         |
| SPINK7     | 4 | 1 | 3.047698752  | 2.81287813   | OK | 0         | 605.8485447 | 0.614539222 | 0         |
| SPRR1A     | 4 | 1 | 1.75470765   | 1.922407149  | OK | 0         | 392.3951057 | 0.398040713 | 0         |
| SPRR1B     | 4 | 1 | 0.537957654  | 1.829923628  | OK | 0         | 378.2818572 | 0.383733197 | 0         |
| SPRR2A     | 4 | 1 | 0.230627493  | 2.248156546  | OK | 0         | 310.9490761 | 0.31542538  | 0         |
| SPRR2D     | 4 | 1 | 0.228177324  | 2.289025305  | OK | 0         | 378.9342593 | 0.384366379 | 0         |
| SPRR2E     | 4 | 1 | 0.292070941  | 2.122065543  | OK | 0         | 232.6424019 | 0.235981389 | 0         |
| SPRR2F     | 4 | 1 | 0.32757105   | 2.066920756  | OK | 0         | 45.12483153 | 0.04567398  | 0         |
| SPRR3      | 4 | 1 | 0.452651993  | 0.557017325  | OK | 0         | 489.8141973 | 0.496876975 | 0         |
| SQLE       | 4 | 1 | -0.960737332 | 0.928280829  | OK | 0         | 238.350283  | 0.241780797 | 0         |
| SRPX2      | 4 | 1 | 2.283137337  | 2.374033449  | OK | 0         | 261.7557817 | 0.265483686 | 0         |
| ST3GAL4    | 4 | 1 | 2.348348991  | 2.099584578  | OK | 0         | 460.4004572 | 0.466985937 | 0         |
| STN1       | 4 | 1 | 1.917301074  | 2.140528677  | OK | 0         | 313.9247032 | 0.318446395 | 0         |
| SUCO       | 4 | 1 | 2.346720711  | 0.310316561  | OK | 0         | 66.78028391 | 0.067730809 | 0         |
| SULT2B1    | 4 | 1 | 1.283354536  | 0.904190062  | OK | 0         | 550.0032649 | 0.557936022 | 0         |
| TGM1       | 4 | 1 | 1.230724738  | 0.828541277  | OK | 0         | 437.7703088 | 0.444079574 | 0         |
| TGM3       | 4 | 1 | 2.873057739  | 1.111881255  | OK | 0         | 660.8776151 | 0.670402302 | 0         |
| TM7SF2     | 4 | 1 | 0.997985192  | 1.042426108  | OK | 0         | 508.0459673 | 0.515371305 | 0         |
| TMEM154    | 4 | 1 | 1.304724858  | 0.400205134  | OK | 0         | 331.3103783 | 0.336083837 | 0         |
| TMEM184A   | 4 | 1 | 0.453562186  | 0.099510191  | OK | 0         | 257.9570182 | 0.261668345 | 0         |
| TMEM265    | 4 | 1 | 1.326204315  | 1.658581255  | OK | 0         | 382.3852645 | 0.387895067 | 0         |
| TMEM45B    | 4 | 1 | 0.345423535  | 0.973878859  | OK | 0         | 457.9010382 | 0.464496985 | 0         |
| TMEM79     | 4 | 1 | 1.575280324  | 0.764211176  | OK | 0         | 280.1790486 | 0.284213603 | 0         |
| TMPRSS11B  | 4 | 1 | 2.823401943  | 2.631305216  | OK | 0         | 713.8195537 | 0.724078489 | 0         |
| TP53I3     | 4 | 1 | 2.734518186  | 0.933127879  | OK | 0         | 274.306019  | 0.278255056 | 0         |
| TPRG1      | 4 | 1 | 2.007654086  | 1.882387637  | OK | 0         | 530.754327  | 0.538400801 | 0         |
| TRNP1      | 4 | 1 | 0.038939015  | 0.500239848  | OK | 0         | 420.8161194 | 0.426882461 | 0         |
| TSPAN3     | 4 | 1 | -0.11121945  | 0.357102869  | OK | 0         | 278.3696823 | 0.282378671 | 0         |
| TST        | 4 | 1 | 1.293027536  | 1.491883753  | OK | 0         | 360.9137332 | 0.366114993 | 0         |
| TUBA4A     | 4 | 1 | 2.469003097  | 0.029910563  | OK | 0         | 300.8033343 | 0.305136339 | 0         |
| UPK1B      | 4 | 1 | 0.215960518  | 0.89030361   | OK | 0         | 147.9459828 | 0.150052629 | 0         |
| UPK3BL1    | 4 | 1 | 1.404047862  | 1.79719591   | OK | 0         | 359.6832323 | 0.364866304 | 0         |
| VAT1       | 4 | 1 | 0.079907969  | 1.560358523  | OK | 0         | 294.9174343 | 0.299164305 | 0         |
| WNK4       | 4 | 1 | 1.57008572   | -0.229618313 | OK | 0         | 226.5163455 | 0.229769044 | 0         |
| WNT5A      | 4 | 1 | 1.877450899  | -0.10791278  | OK | 0         | 161.7628873 | 0.164080699 | 0         |
| ZBED2      | 4 | 1 | 2.914160267  | 1.823194979  | OK | 0         | 136.8986165 | 0.138827077 | 0         |
| ZDHHC21    | 4 | 1 | 1.375249133  | 0.227308749  | OK | 0         | 77.28935721 | 0.07839129  | 0         |
| ABLIM1     | 5 | 1 | -0.217179641 | 3.794879435  | OK | 0         | 327.5709265 | 0.332290726 | 0         |
| ABLIM3     | 5 | 1 | 1.503047899  | 4.188347815  | OK | 0         | 422.3491115 | 0.42838339  | 0         |
| AC004816.1 | 5 | 1 | 1.851444617  | 3.969703673  | OK | 0         | 241.5058012 | 0.244973242 | 0         |
| AC006333.2 | 5 | 1 | 2.13527073   | 4.528072356  | OK | 0         | 96.67960308 | 0.098057408 | 0         |
| ACADM      | 5 | 1 | 1.650183753  | 3.311115263  | OK | 0         | 177.5233061 | 0.180075041 | 0         |
| ADGRF1     | 5 | 1 | 0.548774854  | 3.839282988  | OK | 0         | 319.8729142 | 0.324472391 | 0         |
| ADIPOR1    | 5 | 1 | 1.811903492  | 3.611345766  | OK | 0         | 169.9591125 | 0.172401753 | 0         |
| ADIRF      | 5 | 1 | 2.665994898  | 3.774622439  | OK | 0         | 311.1721144 | 0.31565453  | 0         |
| AFDN       | 5 | 1 | -0.805897101 | 3.313125132  | OK | 0         | 299.8386758 | 0.304157696 | 0         |
| AGFG2      | 5 | 1 | 0.393171415  | 3.175921915  | OK | 0         | 118.2191598 | 0.11990761  | 0         |
| AIF1L      | 5 | 1 | 2.708969847  | 3.520309923  | OK | 0         | 559.0065887 | 0.567028923 | 0         |
| AL121761.1 | 5 | 1 | 0.752994732  | 2.716315268  | OK | 0         | 390.2613009 | 0.395876355 | 0         |
| AL121933.2 | 5 | 1 | 0.371199444  | 2.82887411   | OK | 0         | 116.2867347 | 0.11787498  | 0         |
| AL133453.1 | 5 | 1 | 0.284853057  | 3.984752177  | OK | 0         | 164.2049455 | 0.166556028 | 0         |
| AL512274.1 | 5 | 1 | -0.388732537 | 3.327167509  | OK | 0         | 202.180458  | 0.205083891 | 0         |
| AL627171.2 | 5 | 1 | 0.660119728  | 3.4499979    | OK | 2.57E-119 | 23.19471124 | 0.023516268 | 2.59E-119 |
| ALDH1A3    | 5 | 1 | 0.683515654  | 4.19603443   | OK | 0         | 343.992798  | 0.348918627 | 0         |
| ANGPTL4    | 5 | 1 | 0.859332979  | 2.250810145  | OK | 0         | 101.3838166 | 0.102833744 | 0         |
| ANXA11     | 5 | 1 | 1.525561587  | 3.458152769  | OK | 0         | 232.8567725 | 0.236207695 | 0         |
| ANXA9      | 5 | 1 | 1.158595071  | 3.677791117  | OK | 0         | 569.6644374 | 0.577825339 | 0         |
| AP000866.2 | 5 | 1 | 2.281986371  | 4.074776648  | OK | 0         | 282.3087951 | 0.286275318 | 0         |
| ARHGAP27   | 5 | 1 | 0.604199723  | 3.512483118  | OK | 0         | 161.8326417 | 0.164151927 | 0         |
| ARHGDIB    | 5 | 1 | 1.870288864  | 3.00214052   | OK | 0         | 101.4788249 | 0.102925561 | 0         |
| ATP6V1C2   | 5 | 1 | 0.85270694   | 4.16892433   | OK | 0         | 489.3704892 | 0.496323541 | 0         |
| AVPI1      | 5 | 1 | 1.252370552  | 5.156238554  | OK | 0         | 86.16357186 | 0.087393296 | 0         |
| B3GNT3     | 5 | 1 | 0.95985432   | 3.224968909  | OK | 0         | 409.9786668 | 0.415810769 | 0         |
| B3GNT8     | 5 | 1 | 0.83699346   | 2.476715563  | OK | 0         | 131.5788502 | 0.133463495 | 0         |
| B4GALT5    | 5 | 1 | 0.114755825  | 3.200644968  | OK | 0         | 121.3325945 | 0.123070728 | 0         |
| BAIAP2L2   | 5 | 1 | 2.360195771  | 3.156896113  | OK | 0         | 204.8559365 | 0.207763538 | 0         |
| BCAS1      | 5 | 1 | 0.791616612  | 2.966410635  | OK | 0         | 226.2373063 | 0.229458181 | 0         |



|             |   |   |              |             |    |           |             |             |           |
|-------------|---|---|--------------|-------------|----|-----------|-------------|-------------|-----------|
| BICDL1      | 5 | 1 | 1.411277429  | 4.53283119  | OK | 0         | 89.13088503 | 0.090402636 | 0         |
| BX255925.3  | 5 | 1 | 1.477150813  | 2.671066759 | OK | 0         | 227.5627156 | 0.23083529  | 0         |
| C15orf62    | 5 | 1 | 1.008478419  | 3.177142142 | OK | 0         | 272.4061085 | 0.276294131 | 0         |
| C1orf116    | 5 | 1 | -0.060886666 | 3.797162054 | OK | 0         | 260.1860847 | 0.263931602 | 0         |
| C5orf66-AS1 | 5 | 1 | 2.320603505  | 4.17116165  | OK | 0         | 177.4219913 | 0.179972482 | 0         |
| C6orf132    | 5 | 1 | 1.550416485  | 4.281843184 | OK | 0         | 324.951936  | 0.329633766 | 0         |
| CAMK2N1     | 5 | 1 | 1.366101042  | 3.570693968 | OK | 0         | 720.0195302 | 0.730359679 | 0         |
| CAPN5       | 5 | 1 | 0.659941823  | 3.13435602  | OK | 0         | 206.50282   | 0.20945108  | 0         |
| CASP8       | 5 | 1 | 1.744439141  | 4.65646839  | OK | 0         | 51.36895228 | 0.052097283 | 0         |
| CCDC127     | 5 | 1 | 1.841410176  | 3.403882025 | OK | 0         | 88.04063806 | 0.089295861 | 0         |
| CCNG2       | 5 | 1 | 0.08977522   | 3.817274569 | OK | 0         | 309.511388  | 0.313960732 | 0         |
| CD59        | 5 | 1 | 1.786743239  | 2.361181258 | OK | 0         | 285.6603327 | 0.289773774 | 0         |
| CD68        | 5 | 1 | 1.048223824  | 2.470702647 | OK | 0         | 146.6964098 | 0.148797533 | 0         |
| CDC42EP5    | 5 | 1 | 1.028670431  | 2.805127142 | OK | 0         | 119.8495075 | 0.121568234 | 0         |
| CDKN2AIP    | 5 | 1 | -0.601762756 | 3.547561644 | OK | 0         | 181.2291134 | 0.183834587 | 0         |
| CEACAM7     | 5 | 1 | 0.550712541  | 2.842703341 | OK | 0         | 121.9883098 | 0.123643954 | 0         |
| CFL2        | 5 | 1 | 2.030292646  | 3.209030627 | OK | 1.09E-290 | 36.41840935 | 0.036928002 | 1.10E-290 |
| CKB         | 5 | 1 | 2.001852766  | 3.755930899 | OK | 0         | 120.3262199 | 0.122051663 | 0         |
| CLIP1       | 5 | 1 | -0.859474047 | 2.905121802 | OK | 0         | 309.4371327 | 0.313895078 | 0         |
| CPEB4       | 5 | 1 | -0.231700167 | 3.266991614 | OK | 0         | 169.5389228 | 0.171972937 | 0         |
| CPPED1      | 5 | 1 | 2.085446254  | 3.735492705 | OK | 0         | 163.1978539 | 0.165541678 | 0         |
| CRYM        | 5 | 1 | 1.917866842  | 4.557875632 | OK | 0         | 364.347147  | 0.36939243  | 0         |
| CTSV        | 5 | 1 | 1.107496039  | 3.798141478 | OK | 0         | 224.6085663 | 0.227822945 | 0         |
| CTTNBP2NL   | 5 | 1 | -0.718484386 | 3.646636484 | OK | 0         | 153.6084369 | 0.155813986 | 0         |
| CYTOR       | 5 | 1 | 1.116177485  | 3.802751063 | OK | 0         | 142.4010132 | 0.144432454 | 0         |
| DDIT4       | 5 | 1 | 0.896957774  | 2.290771483 | OK | 0         | 66.00636315 | 0.066947302 | 0         |
| DENND10     | 5 | 1 | 1.980604187  | 2.828616141 | OK | 0         | 144.8079838 | 0.146886591 | 0         |
| DHRS9       | 5 | 1 | 1.585832909  | 4.68468952  | OK | 0         | 693.6118164 | 0.703453951 | 0         |
| DNAJA4      | 5 | 1 | -0.55823718  | 2.998198984 | OK | 0         | 74.40412268 | 0.075464057 | 0         |
| DNAJC5      | 5 | 1 | 1.229144142  | 3.947332381 | OK | 0         | 138.0881593 | 0.140069128 | 0         |
| DOCK9       | 5 | 1 | -0.415216311 | 3.633717058 | OK | 0         | 144.7966763 | 0.146873481 | 0         |
| DTX2        | 5 | 1 | 0.690559522  | 3.525752543 | OK | 0         | 121.0784942 | 0.122814231 | 0         |
| DUOX2       | 5 | 1 | 0.207682565  | 2.870212077 | OK | 0         | 90.99370595 | 0.092289116 | 0         |
| DUOXA2      | 5 | 1 | 0.234775618  | 2.687603949 | OK | 0         | 97.45812282 | 0.098785778 | 0         |
| DUSP4       | 5 | 1 | 1.816091434  | 4.581932066 | OK | 0         | 385.3263131 | 0.390707734 | 0         |
| ELF3        | 5 | 1 | 1.002270341  | 2.629482268 | OK | 0         | 306.605412  | 0.31102224  | 0         |
| ELF3-AS1    | 5 | 1 | 1.941260234  | 4.355633734 | OK | 0         | 278.6263531 | 0.282592179 | 0         |
| EPS8L1      | 5 | 1 | 0.754541815  | 3.745923041 | OK | 0         | 529.1657014 | 0.536786123 | 0         |
| EPS8L2      | 5 | 1 | 1.287296996  | 3.232457159 | OK | 0         | 231.9668079 | 0.235305341 | 0         |
| ESAM        | 5 | 1 | 1.521073297  | 4.61438465  | OK | 0         | 512.8087214 | 0.520026763 | 0         |
| FAM107B     | 5 | 1 | 1.112190858  | 4.826979636 | OK | 0         | 177.8900624 | 0.180430125 | 0         |
| FBXO32      | 5 | 1 | 1.164076195  | 4.145256041 | OK | 0         | 223.7851275 | 0.227001789 | 0         |
| FBXO34      | 5 | 1 | -0.494350537 | 3.499712942 | OK | 0         | 138.5374189 | 0.140525067 | 0         |
| FBXW11      | 5 | 1 | -0.573653921 | 3.765322207 | OK | 0         | 83.83945136 | 0.085037327 | 0         |
| FCHO2       | 5 | 1 | -0.793487533 | 3.428331374 | OK | 0         | 219.8072272 | 0.222968952 | 0         |
| FRMD4B      | 5 | 1 | -0.868725284 | 2.618279932 | OK | 0         | 234.6813625 | 0.238059037 | 0         |
| FTH1        | 5 | 1 | 2.290752903  | 4.18931198  | OK | 0         | 204.1897415 | 0.207120341 | 0         |
| FUT3        | 5 | 1 | 0.442447022  | 3.280181883 | OK | 0         | 413.1890585 | 0.419137841 | 0         |
| FUT6        | 5 | 1 | 0.545535073  | 3.329130648 | OK | 0         | 382.9857088 | 0.3884797   | 0         |
| GABARAPL2   | 5 | 1 | 2.32674636   | 4.353869437 | OK | 0         | 237.2393712 | 0.240653954 | 0         |
| GALNT1      | 5 | 1 | -0.647503957 | 3.67525482  | OK | 0         | 263.3999098 | 0.267192499 | 0         |
| GCC2        | 5 | 1 | -0.079069659 | 3.961014269 | OK | 0         | 100.5941233 | 0.102034275 | 0         |
| GCHFR       | 5 | 1 | 1.234852657  | 3.585375307 | OK | 0         | 226.9033018 | 0.230167588 | 0         |
| GFOD2       | 5 | 1 | 0.210803047  | 3.698657511 | OK | 0         | 99.32999098 | 0.100749341 | 0         |
| GMDS        | 5 | 1 | 2.136051074  | 2.485879896 | OK | 0         | 239.7198196 | 0.243167406 | 0         |
| GNA15       | 5 | 1 | 1.357638404  | 3.187748907 | OK | 0         | 264.9053798 | 0.26871901  | 0         |
| GPRC5A      | 5 | 1 | 1.185081646  | 4.240655897 | OK | 0         | 212.3383391 | 0.215373896 | 0         |
| GPT2        | 5 | 1 | 1.065448925  | 3.264035223 | OK | 0         | 174.4665032 | 0.176973331 | 0         |
| GRHL1       | 5 | 1 | -0.454951748 | 2.886757372 | OK | 0         | 353.7192684 | 0.358814243 | 0         |
| H19         | 5 | 1 | 1.840774671  | 2.769955157 | OK | 0         | 137.5867092 | 0.139556512 | 0         |
| H1F0        | 5 | 1 | 0.761057668  | 2.470832823 | OK | 0         | 189.7791318 | 0.192508179 | 0         |
| H2AFJ       | 5 | 1 | 2.400450722  | 4.163906096 | OK | 0         | 269.0300459 | 0.272903699 | 0         |
| HEBP2       | 5 | 1 | 2.182238952  | 3.286148547 | OK | 0         | 362.6946454 | 0.367918582 | 0         |
| HLCS        | 5 | 1 | 2.068586246  | 4.209116934 | OK | 0         | 85.73277037 | 0.086951492 | 0         |
| HMOX1       | 5 | 1 | 0.779808358  | 4.198033331 | OK | 0         | 448.5879042 | 0.454981389 | 0         |
| HOTAIRM1    | 5 | 1 | 2.21312143   | 4.560224531 | OK | 0         | 95.55791247 | 0.096924821 | 0         |
| HS3ST6      | 5 | 1 | 2.336584226  | 4.240200995 | OK | 0         | 144.1704474 | 0.146235816 | 0         |
| HSPB8       | 5 | 1 | 0.304159955  | 3.347195147 | OK | 0         | 271.3592445 | 0.275262104 | 0         |
| IL1A        | 5 | 1 | 1.546708778  | 4.849163054 | OK | 0         | 257.9598712 | 0.261592534 | 0         |
| IL36A       | 5 | 1 | 1.322485909  | 4.87915325  | OK | 0         | 602.4112865 | 0.610955103 | 0         |
| IL36RN      | 5 | 1 | 0.264174119  | 2.66430807  | OK | 0         | 221.0506508 | 0.224127572 | 0         |
| ITSN2       | 5 | 1 | -0.669386491 | 3.280333041 | OK | 0         | 203.8113867 | 0.206742155 | 0         |
| KATNBL1     | 5 | 1 | 1.925369397  | 3.441823481 | OK | 0         | 164.5362015 | 0.166900391 | 0         |

|              |   |   |              |             |    |   |             |             |   |
|--------------|---|---|--------------|-------------|----|---|-------------|-------------|---|
| KAZN         | 5 | 1 | 1.359249339  | 3.553071974 | OK | 0 | 247.0795528 | 0.250634955 | 0 |
| KIFC3        | 5 | 1 | 1.571455554  | 4.702668188 | OK | 0 | 263.9422913 | 0.26769507  | 0 |
| KRT23        | 5 | 1 | 0.871362833  | 2.978250025 | OK | 0 | 194.875347  | 0.197610113 | 0 |
| KRT7         | 5 | 1 | 1.646416262  | 2.875129698 | OK | 0 | 200.9638865 | 0.203845271 | 0 |
| KRT80        | 5 | 1 | -0.295225366 | 2.774516581 | OK | 0 | 433.1171235 | 0.439350742 | 0 |
| LEXM         | 5 | 1 | 1.272288517  | 3.287549494 | OK | 0 | 311.254817  | 0.315633758 | 0 |
| LGALS3       | 5 | 1 | 2.160169975  | 4.488221167 | OK | 0 | 222.8252583 | 0.226024261 | 0 |
| LINC02303    | 5 | 1 | 2.070167199  | 3.185497282 | OK | 0 | 360.8859439 | 0.365870924 | 0 |
| LIPE-AS1     | 5 | 1 | 2.196977154  | 3.69919586  | OK | 0 | 105.8625952 | 0.107358008 | 0 |
| LMO2         | 5 | 1 | 0.92434612   | 2.913143633 | OK | 0 | 290.3298077 | 0.294458211 | 0 |
| LMO7         | 5 | 1 | -0.664312466 | 3.485337256 | OK | 0 | 335.8673351 | 0.340706631 | 0 |
| LPIN2        | 5 | 1 | 0.891191842  | 4.190340994 | OK | 0 | 253.9798394 | 0.257588518 | 0 |
| LRG1         | 5 | 1 | 0.588316188  | 2.90701866  | OK | 0 | 63.62816472 | 0.064533394 | 0 |
| LY6K         | 5 | 1 | 2.176342145  | 4.376996992 | OK | 0 | 109.3602321 | 0.110926012 | 0 |
| MAB21L4      | 5 | 1 | 1.804627076  | 2.64653158  | OK | 0 | 455.2922248 | 0.461857189 | 0 |
| MACC1        | 5 | 1 | -0.330576285 | 3.60785055  | OK | 0 | 166.5992575 | 0.16899126  | 0 |
| MALL         | 5 | 1 | -0.335006341 | 3.737776755 | OK | 0 | 505.074935  | 0.512359172 | 0 |
| MAP1LC3A     | 5 | 1 | 2.415848867  | 4.099238394 | OK | 0 | 233.0291241 | 0.23637113  | 0 |
| MAPK3        | 5 | 1 | 1.143363163  | 3.356910704 | OK | 0 | 183.2077446 | 0.185839985 | 0 |
| MAPK8        | 5 | 1 | 1.43880941   | 4.940137862 | OK | 0 | 77.64106605 | 0.078747147 | 0 |
| 5-Mar        | 5 | 1 | 2.12173082   | 4.037055491 | OK | 0 | 186.8426922 | 0.189529083 | 0 |
| MDFIC        | 5 | 1 | 1.650655583  | 3.576622485 | OK | 0 | 93.29667592 | 0.094630302 | 0 |
| METRNL       | 5 | 1 | 1.661725537  | 3.070854185 | OK | 0 | 465.5651301 | 0.472278351 | 0 |
| MGAT1        | 5 | 1 | 1.345754907  | 3.920424937 | OK | 0 | 152.810058  | 0.155004116 | 0 |
| MPRIP        | 5 | 1 | 1.506429568  | 4.165702818 | OK | 0 | 145.1902765 | 0.147273551 | 0 |
| MPZL3        | 5 | 1 | 0.423166976  | 3.243092535 | OK | 0 | 186.8303627 | 0.189499718 | 0 |
| MTERF4       | 5 | 1 | 2.188767687  | 3.515886782 | OK | 0 | 73.91733955 | 0.074971993 | 0 |
| MUC1         | 5 | 1 | 0.063736156  | 3.38903427  | OK | 0 | 432.0390421 | 0.438262118 | 0 |
| MUC20        | 5 | 1 | 1.590833024  | 2.764943121 | OK | 0 | 325.1346702 | 0.32981643  | 0 |
| MUC22        | 5 | 1 | 1.379609302  | 4.635846136 | OK | 0 | 304.9171991 | 0.309142369 | 0 |
| MXD1         | 5 | 1 | 0.794135206  | 4.421854018 | OK | 0 | 351.7035145 | 0.356768779 | 0 |
| MYEOV        | 5 | 1 | 2.141988889  | 3.434927939 | OK | 0 | 254.0325606 | 0.257679879 | 0 |
| MYL12A       | 5 | 1 | 2.239586369  | 3.458912371 | OK | 0 | 297.2749322 | 0.301553588 | 0 |
| MYO5B        | 5 | 1 | -0.298074468 | 2.894899844 | OK | 0 | 232.9744069 | 0.23632279  | 0 |
| MYO6         | 5 | 1 | -0.587553366 | 4.048232077 | OK | 0 | 214.7233112 | 0.21781241  | 0 |
| NAMPT        | 5 | 1 | -0.506788477 | 3.149124144 | OK | 0 | 299.2756443 | 0.303586657 | 0 |
| NAPRT        | 5 | 1 | 1.497659162  | 3.19459915  | OK | 0 | 262.3857703 | 0.266163749 | 0 |
| NCCRP1       | 5 | 1 | 1.198090748  | 2.270748614 | OK | 0 | 630.7482515 | 0.639842124 | 0 |
| NDRG2        | 5 | 1 | 0.029266969  | 3.900654314 | OK | 0 | 271.247373  | 0.275152489 | 0 |
| NIBAN2       | 5 | 1 | 1.787779943  | 2.769644736 | OK | 0 | 359.8871766 | 0.365073628 | 0 |
| NT5C2        | 5 | 1 | -0.064067706 | 3.433454989 | OK | 0 | 191.4711457 | 0.194223297 | 0 |
| PCBP1-AS1    | 5 | 1 | 2.084335581  | 3.0040493   | OK | 0 | 92.19801988 | 0.093511388 | 0 |
| PDCD6        | 5 | 1 | 2.024524585  | 3.328223227 | OK | 0 | 280.1072271 | 0.284140491 | 0 |
| PHACTR4      | 5 | 1 | -0.506470307 | 3.799765108 | OK | 0 | 159.9734864 | 0.162271697 | 0 |
| PHLDA1       | 5 | 1 | 0.952495844  | 4.285964011 | OK | 0 | 463.6616327 | 0.470329947 | 0 |
| PLEKHM1      | 5 | 1 | 0.317323641  | 3.406489371 | OK | 0 | 113.0244293 | 0.114640891 | 0 |
| PLIN3        | 5 | 1 | 1.379776642  | 4.410368918 | OK | 0 | 177.4883491 | 0.180039894 | 0 |
| PLSCR1       | 5 | 1 | 1.58724703   | 3.427526472 | OK | 0 | 141.7868003 | 0.143821853 | 0 |
| PORCN        | 5 | 1 | 1.569070176  | 4.420709608 | OK | 0 | 63.14920094 | 0.064041155 | 0 |
| PPDPF        | 5 | 1 | 2.374847547  | 3.99579191  | OK | 0 | 187.5298512 | 0.190219661 | 0 |
| PPP1R14B-AS1 | 5 | 1 | 1.82748957   | 2.408815859 | OK | 0 | 171.1926783 | 0.173650777 | 0 |
| PRDM1        | 5 | 1 | -0.24970816  | 2.77958679  | OK | 0 | 346.0109725 | 0.350989948 | 0 |
| PRSS22       | 5 | 1 | 0.868888974  | 2.496704577 | OK | 0 | 284.1912347 | 0.288282608 | 0 |
| PRSS27       | 5 | 1 | 1.380202786  | 2.348289965 | OK | 0 | 644.7511215 | 0.654044182 | 0 |
| PRSS8        | 5 | 1 | 0.802625098  | 3.794003485 | OK | 0 | 116.5088726 | 0.118178879 | 0 |
| PSCA         | 5 | 1 | 2.35007991   | 4.001967429 | OK | 0 | 578.3721199 | 0.586676511 | 0 |
| PTK6         | 5 | 1 | 0.200677291  | 3.203274248 | OK | 0 | 341.5986134 | 0.34651898  | 0 |
| PWWP2B       | 5 | 1 | 1.05733645   | 3.46356058  | OK | 0 | 82.89897147 | 0.084080905 | 0 |
| RAB5IF       | 5 | 1 | 2.120733157  | 2.949410914 | OK | 0 | 356.1051098 | 0.361236098 | 0 |
| RAB9A        | 5 | 1 | 2.194156662  | 4.534153937 | OK | 0 | 166.2163694 | 0.168604631 | 0 |
| RANBP9       | 5 | 1 | -0.242359623 | 3.762839316 | OK | 0 | 202.9141436 | 0.205831249 | 0 |
| RFK          | 5 | 1 | 1.717212037  | 4.748086928 | OK | 0 | 120.8421224 | 0.122572507 | 0 |
| RHOF         | 5 | 1 | 1.45730348   | 3.943708895 | OK | 0 | 222.8249627 | 0.225977392 | 0 |
| RNF223       | 5 | 1 | 1.050098166  | 4.393172263 | OK | 0 | 340.3687653 | 0.345251503 | 0 |
| RNF39        | 5 | 1 | 1.39312096   | 4.611401556 | OK | 0 | 119.0689491 | 0.120768961 | 0 |
| S100P        | 5 | 1 | 0.62118359   | 2.987615584 | OK | 0 | 484.7854691 | 0.491767629 | 0 |
| SAMD9        | 5 | 1 | 0.108711258  | 3.801657198 | OK | 0 | 311.5740276 | 0.31606273  | 0 |
| SAMD9L       | 5 | 1 | 0.061001495  | 3.980484007 | OK | 0 | 49.42289159 | 0.050122058 | 0 |
| SAT1         | 5 | 1 | 1.85485901   | 2.707714079 | OK | 0 | 187.8987578 | 0.190598692 | 0 |
| SCEL         | 5 | 1 | -0.199991807 | 3.73363447  | OK | 0 | 581.4354464 | 0.589822953 | 0 |
| SCNN1A       | 5 | 1 | -0.006657585 | 3.139955996 | OK | 0 | 258.2221932 | 0.261938844 | 0 |
| SDCBP2       | 5 | 1 | 2.066227571  | 3.755651472 | OK | 0 | 422.0514287 | 0.42813532  | 0 |
| SDHA         | 5 | 1 | 1.821547762  | 3.494743822 | OK | 0 | 136.0052107 | 0.137957321 | 0 |

|            |   |   |              |             |    |           |             |             |           |
|------------|---|---|--------------|-------------|----|-----------|-------------|-------------|-----------|
| SEC24C     | 5 | 1 | 0.610689596  | 3.386854647 | OK | 0         | 88.05993781 | 0.089317055 | 0         |
| SERINC2    | 5 | 1 | 1.802680031  | 3.99084091  | OK | 0         | 193.086298  | 0.19586232  | 0         |
| SERPINB13  | 5 | 1 | -0.932775601 | 2.497323988 | OK | 0         | 412.3513152 | 0.418295411 | 0         |
| SGTA       | 5 | 1 | 1.079403967  | 3.865090369 | OK | 0         | 71.36433426 | 0.07238135  | 0         |
| SH3BGR2    | 5 | 1 | 0.390353308  | 4.000652788 | OK | 0         | 472.1057588 | 0.47890126  | 0         |
| SLC16A3    | 5 | 1 | 1.170060769  | 3.080048083 | OK | 0         | 192.9056967 | 0.195649119 | 0         |
| SLC25A23   | 5 | 1 | 0.346444026  | 3.508048056 | OK | 0         | 179.6251488 | 0.182207074 | 0         |
| SLC9A3R2   | 5 | 1 | 2.348631397  | 4.316080092 | OK | 0         | 84.21810082 | 0.085418461 | 0         |
| SLK        | 5 | 1 | -0.810439929 | 3.252817629 | OK | 0         | 321.1278672 | 0.325754644 | 0         |
| SLURP2     | 5 | 1 | 1.894557492  | 2.564851759 | OK | 0         | 602.1832332 | 0.610864315 | 0         |
| SMIM22     | 5 | 1 | 1.180316732  | 2.798590659 | OK | 0         | 84.16330774 | 0.085354059 | 0         |
| SNCG       | 5 | 1 | 2.554073349  | 3.849249838 | OK | 0         | 289.5755367 | 0.293724234 | 0         |
| SNX24      | 5 | 1 | 2.420009032  | 3.822438238 | OK | 0         | 207.5905829 | 0.210575588 | 0         |
| SNX8       | 5 | 1 | 1.358911381  | 3.326991556 | OK | 0         | 97.14405305 | 0.098527642 | 0         |
| SORBS2     | 5 | 1 | 0.78365779   | 2.884259699 | OK | 0         | 61.31761275 | 0.062185583 | 0         |
| SORT1      | 5 | 1 | -0.33216761  | 2.948586939 | OK | 0         | 431.0424572 | 0.437252073 | 0         |
| SPAG1      | 5 | 1 | 0.9319648    | 3.899994372 | OK | 0         | 231.9243405 | 0.235246447 | 0         |
| SPECC1     | 5 | 1 | 1.182206169  | 4.404376028 | OK | 0         | 215.8631206 | 0.218954924 | 0         |
| SPINT1     | 5 | 1 | 1.243958578  | 3.191831587 | OK | 0         | 258.9356485 | 0.262663718 | 0         |
| SPNS2      | 5 | 1 | 1.044174031  | 4.720156668 | OK | 0         | 761.2272175 | 0.772106556 | 0         |
| SPRR2B     | 5 | 1 | 0.264666096  | 2.428786276 | OK | 0         | 93.96744768 | 0.095104836 | 0         |
| SPSB3      | 5 | 1 | 2.275676624  | 4.12418413  | OK | 0         | 134.1963623 | 0.136121752 | 0         |
| SRGAP1     | 5 | 1 | 0.717616752  | 3.138111113 | OK | 0         | 162.3382386 | 0.164656515 | 0         |
| SRSF5      | 5 | 1 | 1.515917257  | 3.191328524 | OK | 0         | 263.4900155 | 0.267283833 | 0         |
| STK39      | 5 | 1 | -0.456921324 | 2.962276934 | OK | 0         | 272.3405255 | 0.276259933 | 0         |
| STRADB     | 5 | 1 | 1.968377606  | 4.183063505 | OK | 0         | 105.2190489 | 0.106720792 | 0         |
| SYAP1      | 5 | 1 | -0.463487014 | 3.9830842   | OK | 0         | 161.8119811 | 0.164137067 | 0         |
| TAX1BP1    | 5 | 1 | -0.754978403 | 3.994060992 | OK | 0         | 344.2932369 | 0.349254213 | 0         |
| TGFA       | 5 | 1 | 0.100980893  | 3.936361788 | OK | 0         | 102.6043849 | 0.104069087 | 0         |
| TGFB1      | 5 | 1 | 0.698172406  | 2.553980349 | OK | 0         | 130.7056169 | 0.132577501 | 0         |
| TIMP2      | 5 | 1 | 2.079420344  | 4.107531546 | OK | 0         | 764.7726239 | 0.775709043 | 0         |
| TJP1       | 5 | 1 | -0.877652987 | 3.114617823 | OK | 0         | 339.8626254 | 0.344760063 | 0         |
| TJP3       | 5 | 1 | 0.947804645  | 2.869461058 | OK | 0         | 221.3523421 | 0.224531575 | 0         |
| TMEM127    | 5 | 1 | 0.665525303  | 3.561129568 | OK | 0         | 103.4900656 | 0.104970329 | 0         |
| TMEM40     | 5 | 1 | 2.52876021   | 3.960895537 | OK | 0         | 485.0987622 | 0.492094374 | 0         |
| TMEM8A     | 5 | 1 | 1.090903164  | 3.311614512 | OK | 0         | 104.2874945 | 0.105774874 | 0         |
| TMPRSS11D  | 5 | 1 | -0.065057739 | 2.814024447 | OK | 0         | 302.1537244 | 0.306502928 | 0         |
| TMPRSS11E  | 5 | 1 | 0.417922453  | 3.994251726 | OK | 0         | 634.0384728 | 0.643170651 | 0         |
| TMPRSS2    | 5 | 1 | 0.472112701  | 4.025514124 | OK | 0         | 389.1246995 | 0.394696112 | 0         |
| TP53INP2   | 5 | 1 | 0.531973884  | 3.888635634 | OK | 0         | 304.4155496 | 0.30877336  | 0         |
| TRIP10     | 5 | 1 | 0.53034626   | 3.708186625 | OK | 0         | 328.0358406 | 0.332760368 | 0         |
| TSPAN6     | 5 | 1 | 1.738747076  | 2.806931017 | OK | 0         | 263.4586299 | 0.267250206 | 0         |
| TTC22      | 5 | 1 | 0.462346986  | 3.264754771 | OK | 0         | 177.7604196 | 0.180313225 | 0         |
| TTC9       | 5 | 1 | 0.878832143  | 3.969416617 | OK | 0         | 435.4616317 | 0.441737488 | 0         |
| TTYH1      | 5 | 1 | 1.15091236   | 3.766235827 | OK | 0         | 344.0595602 | 0.348940264 | 0         |
| UACA       | 5 | 1 | -0.847637757 | 3.453666209 | OK | 0         | 191.9155807 | 0.19467488  | 0         |
| UBE2D1     | 5 | 1 | 2.084017888  | 3.717722891 | OK | 0         | 123.5960563 | 0.125368031 | 0         |
| UBL3       | 5 | 1 | -0.261745318 | 3.669373511 | OK | 0         | 216.1318563 | 0.219240844 | 0         |
| UPK3B      | 5 | 1 | 2.369172469  | 3.070439814 | OK | 0         | 434.2684569 | 0.440491682 | 0         |
| VASN       | 5 | 1 | 0.761317164  | 3.646884917 | OK | 0         | 306.1249153 | 0.310485614 | 0         |
| VSIG10     | 5 | 1 | 1.646806256  | 3.88475561  | OK | 0         | 101.6243571 | 0.103075594 | 0         |
| VSIG10L    | 5 | 1 | 0.53320779   | 3.115911959 | OK | 0         | 408.1557926 | 0.41402315  | 0         |
| VSIG2      | 5 | 1 | 2.261975423  | 3.558541773 | OK | 0         | 609.2245601 | 0.617911764 | 0         |
| WDR26      | 5 | 1 | -0.372366771 | 3.645667551 | OK | 0         | 158.0215038 | 0.160290493 | 0         |
| WDR45B     | 5 | 1 | -0.684584841 | 3.321651457 | OK | 0         | 179.6375217 | 0.182219819 | 0         |
| YPEL3      | 5 | 1 | 2.103712932  | 4.032507895 | OK | 0         | 169.9387242 | 0.172381005 | 0         |
| ZFAND2A    | 5 | 1 | 2.303498164  | 4.45271015  | OK | 7.89E-303 | 37.17746599 | 0.037701234 | 8.00E-303 |
| ZFAND5     | 5 | 1 | 0.997222923  | 4.390746115 | OK | 0         | 220.1789921 | 0.223347295 | 0         |
| ZNF101     | 5 | 1 | 2.071026937  | 4.206876753 | OK | 0         | 91.93897505 | 0.09324362  | 0         |
| ZNF185     | 5 | 1 | -0.110329791 | 3.2754755   | OK | 0         | 389.9671791 | 0.395588249 | 0         |
| ZNRF1      | 5 | 1 | 2.361412541  | 4.017040251 | OK | 0         | 218.7315085 | 0.221878561 | 0         |
| AC023157.3 | 6 | 1 | 0.654476822  | 5.484818457 | OK | 0         | 104.1856252 | 0.105675341 | 0         |
| ACOX1      | 6 | 1 | -0.457640632 | 4.568180083 | OK | 0         | 217.4989344 | 0.220627276 | 0         |
| ADIPOR2    | 6 | 1 | 0.631731526  | 4.765007017 | OK | 0         | 179.564683  | 0.182144731 | 0         |
| AMOTL2     | 6 | 1 | -0.269193395 | 4.415825842 | OK | 0         | 69.07158248 | 0.070054999 | 0         |
| ANKRD13A   | 6 | 1 | -0.168756589 | 4.462661742 | OK | 0         | 113.9198441 | 0.115551767 | 0         |
| ANKRD37    | 6 | 1 | 0.947839931  | 5.604867934 | OK | 0         | 167.7151696 | 0.170125335 | 0         |
| ARHGAP10   | 6 | 1 | 0.234524802  | 4.402782439 | OK | 0         | 207.7814854 | 0.210769071 | 0         |
| ARL4C      | 6 | 1 | 0.452182606  | 4.74882984  | OK | 0         | 180.6920978 | 0.183289042 | 0         |
| ASCC2      | 6 | 1 | 0.639093847  | 5.425029753 | OK | 0         | 123.0272127 | 0.124790831 | 0         |
| ATG9B      | 6 | 1 | 0.574757979  | 4.585546492 | OK | 0         | 537.9230503 | 0.54557172  | 0         |
| BPGM       | 6 | 1 | 0.162322596  | 5.505266188 | OK | 0         | 48.0966126  | 0.04877735  | 0         |
| C18orf25   | 6 | 1 | 0.468652204  | 5.148887633 | OK | 0         | 201.5397077 | 0.20443287  | 0         |

|           |   |   |              |             |    |   |             |             |   |
|-----------|---|---|--------------|-------------|----|---|-------------|-------------|---|
| CDKL5     | 6 | 1 | -0.206181392 | 4.554294585 | OK | 0 | 91.96738186 | 0.093274562 | 0 |
| CFLAR     | 6 | 1 | 0.583018587  | 5.199415205 | OK | 0 | 142.281627  | 0.144324214 | 0 |
| CGNL1     | 6 | 1 | 0.820018557  | 4.883240698 | OK | 0 | 545.4976824 | 0.553241585 | 0 |
| CHAC1     | 6 | 1 | -0.014312013 | 5.097069739 | OK | 0 | 280.486403  | 0.284307749 | 0 |
| CITED2    | 6 | 1 | 0.685852543  | 5.244547842 | OK | 0 | 129.654138  | 0.131513978 | 0 |
| CNST      | 6 | 1 | 0.580457882  | 5.115193365 | OK | 0 | 117.2043621 | 0.118878763 | 0 |
| CSNK1E    | 6 | 1 | 0.114267126  | 4.935920714 | OK | 0 | 129.6477081 | 0.131505603 | 0 |
| DKK1      | 6 | 1 | 0.659969733  | 5.518457411 | OK | 0 | 336.7215333 | 0.341410539 | 0 |
| DUSP14    | 6 | 1 | 0.223446146  | 5.654047964 | OK | 0 | 102.7899874 | 0.104260715 | 0 |
| DUSP5     | 6 | 1 | 0.543381975  | 5.326819418 | OK | 0 | 331.9651945 | 0.3367381   | 0 |
| ERO1A     | 6 | 1 | 0.795767189  | 4.576729773 | OK | 0 | 347.3011844 | 0.352302382 | 0 |
| FAM214A   | 6 | 1 | 0.253162519  | 4.863839148 | OK | 0 | 191.4079091 | 0.19415462  | 0 |
| FLG       | 6 | 1 | 0.212209538  | 5.657109259 | OK | 0 | 325.6668067 | 0.330272629 | 0 |
| GNE       | 6 | 1 | -0.184518918 | 4.501211165 | OK | 0 | 98.67681552 | 0.100074713 | 0 |
| GPAT3     | 6 | 1 | -0.100526735 | 4.944177626 | OK | 0 | 312.9460905 | 0.317342511 | 0 |
| GRPEL2    | 6 | 1 | 0.849469234  | 5.27301216  | OK | 0 | 311.9734578 | 0.31644364  | 0 |
| HCG22     | 6 | 1 | 0.667226777  | 5.208042143 | OK | 0 | 389.00955   | 0.394543253 | 0 |
| HILPDA    | 6 | 1 | 0.878430366  | 5.50162792  | OK | 0 | 250.1113345 | 0.253702216 | 0 |
| IL1RN     | 6 | 1 | 0.583720103  | 5.044149397 | OK | 0 | 450.6357138 | 0.457133021 | 0 |
| ITGB8     | 6 | 1 | -0.114590689 | 4.204757689 | OK | 0 | 136.1836871 | 0.138137535 | 0 |
| KPRP      | 6 | 1 | 0.714850188  | 5.559823988 | OK | 0 | 276.705257  | 0.280506374 | 0 |
| KRT16     | 6 | 1 | -0.253499016 | 5.099515913 | OK | 0 | 250.291273  | 0.253894899 | 0 |
| KRTAP3-2  | 6 | 1 | 1.176404372  | 6.712679861 | OK | 0 | 183.2759151 | 0.185606821 | 0 |
| LNX1      | 6 | 1 | 0.656699971  | 4.78874111  | OK | 0 | 185.9705633 | 0.188637032 | 0 |
| LPIN1     | 6 | 1 | 0.496360198  | 4.964568137 | OK | 0 | 466.4110305 | 0.473084434 | 0 |
| MACO1     | 6 | 1 | 0.359179393  | 4.905659674 | OK | 0 | 114.9008094 | 0.116546607 | 0 |
| MCU       | 6 | 1 | 0.355279998  | 4.623193739 | OK | 0 | 116.4249278 | 0.118089442 | 0 |
| MT1A      | 6 | 1 | 1.2033294    | 6.768424033 | OK | 0 | 76.09390949 | 0.076930472 | 0 |
| MT1E      | 6 | 1 | 1.213833824  | 6.769074438 | OK | 0 | 390.9570623 | 0.39659257  | 0 |
| MT1F      | 6 | 1 | 1.210290865  | 6.774556158 | OK | 0 | 72.21828667 | 0.073239868 | 0 |
| MT1G      | 6 | 1 | 1.228782699  | 6.795895575 | OK | 0 | 285.1050767 | 0.289200487 | 0 |
| MT1H      | 6 | 1 | 1.194084392  | 6.75208473  | OK | 0 | 279.0143532 | 0.282987201 | 0 |
| MT1M      | 6 | 1 | 1.237856672  | 6.802793501 | OK | 0 | 161.0983657 | 0.163389607 | 0 |
| MT2A      | 6 | 1 | 1.250069276  | 6.821645735 | OK | 0 | 466.5079858 | 0.473235012 | 0 |
| MYZAP     | 6 | 1 | 0.263877705  | 4.836771963 | OK | 0 | 320.8284676 | 0.325419829 | 0 |
| NABP1     | 6 | 1 | 0.434566007  | 5.238608359 | OK | 0 | 127.0786783 | 0.128899799 | 0 |
| NEDD4L    | 6 | 1 | -0.077365383 | 4.443242071 | OK | 0 | 82.95396745 | 0.084136604 | 0 |
| NR1D1     | 6 | 1 | 1.081408009  | 6.453282355 | OK | 0 | 96.46358663 | 0.097840897 | 0 |
| OXSRI     | 6 | 1 | -0.255462631 | 4.587451933 | OK | 0 | 137.6766898 | 0.139651895 | 0 |
| PADI1     | 6 | 1 | 0.139825896  | 4.762464522 | OK | 0 | 435.3303383 | 0.441577366 | 0 |
| PARD6B    | 6 | 1 | -0.106402441 | 4.568169592 | OK | 0 | 138.7384022 | 0.140726382 | 0 |
| PDP1      | 6 | 1 | -0.109326586 | 4.360187529 | OK | 0 | 65.35033446 | 0.066279627 | 0 |
| PDZD2     | 6 | 1 | -0.122440203 | 4.343046187 | OK | 0 | 78.1201569  | 0.079233321 | 0 |
| PELI1     | 6 | 1 | -0.107826933 | 4.880102156 | OK | 0 | 150.4246262 | 0.152582908 | 0 |
| PHACTR2   | 6 | 1 | -0.07844673  | 4.995727537 | OK | 0 | 203.3841078 | 0.206309095 | 0 |
| PPL       | 6 | 1 | -0.50208877  | 4.450412749 | OK | 0 | 426.5544047 | 0.432704026 | 0 |
| PTPN3     | 6 | 1 | -0.28791736  | 4.718440054 | OK | 0 | 81.25068811 | 0.082409659 | 0 |
| QSOX1     | 6 | 1 | 0.291849331  | 5.440801619 | OK | 0 | 294.215965  | 0.298448385 | 0 |
| RASGEF1B  | 6 | 1 | 0.600836412  | 5.473721503 | OK | 0 | 135.6035204 | 0.137538862 | 0 |
| RIOK3     | 6 | 1 | -0.624993786 | 4.121131895 | OK | 0 | 330.2011143 | 0.334958176 | 0 |
| RMND5A    | 6 | 1 | 0.270897881  | 4.999139784 | OK | 0 | 151.8914784 | 0.154071822 | 0 |
| RNASE7    | 6 | 1 | 0.201578096  | 5.575141905 | OK | 0 | 602.393195  | 0.610915876 | 0 |
| RNF169    | 6 | 1 | 0.384669051  | 4.67060089  | OK | 0 | 131.59774   | 0.133484666 | 0 |
| SASH1     | 6 | 1 | -0.40657626  | 4.25782585  | OK | 0 | 231.7463291 | 0.235081072 | 0 |
| SEC14L1   | 6 | 1 | 0.381332771  | 4.559777258 | OK | 0 | 122.4094454 | 0.124162302 | 0 |
| SECISBP2L | 6 | 1 | -0.364160165 | 4.571111677 | OK | 0 | 174.6378579 | 0.177145133 | 0 |
| SESN2     | 6 | 1 | 0.709717736  | 5.434245108 | OK | 0 | 176.021871  | 0.178533925 | 0 |
| SH3D19    | 6 | 1 | -0.311401709 | 4.144282339 | OK | 0 | 99.98079513 | 0.101410929 | 0 |
| SLC20A2   | 6 | 1 | -0.288973316 | 4.951071738 | OK | 0 | 112.7618792 | 0.114377453 | 0 |
| SNX9      | 6 | 1 | 0.589619414  | 5.014683722 | OK | 0 | 213.368937  | 0.216436584 | 0 |
| SYNPO2L   | 6 | 1 | 0.628093824  | 5.540040968 | OK | 0 | 228.9929963 | 0.232065685 | 0 |
| TCP11L2   | 6 | 1 | 0.793558941  | 4.927032469 | OK | 0 | 275.0539928 | 0.279000131 | 0 |
| TEAD1     | 6 | 1 | -0.364682301 | 4.406012534 | OK | 0 | 137.5743625 | 0.139547382 | 0 |
| TICAM1    | 6 | 1 | 0.624626265  | 4.888031004 | OK | 0 | 157.9724732 | 0.160236809 | 0 |
| TMOD3     | 6 | 1 | -0.642777904 | 4.180425642 | OK | 0 | 357.3484758 | 0.362497716 | 0 |
| TNIP1     | 6 | 1 | -0.398778781 | 4.572251318 | OK | 0 | 186.0050496 | 0.188679079 | 0 |
| TP53BP2   | 6 | 1 | 0.026254193  | 4.778003691 | OK | 0 | 106.268608  | 0.107789312 | 0 |
| TRIM2     | 6 | 1 | 0.020363644  | 4.501749991 | OK | 0 | 176.6294491 | 0.179154483 | 0 |
| TUFT1     | 6 | 1 | -0.253424629 | 4.955034254 | OK | 0 | 107.4780284 | 0.109015751 | 0 |
| UBE2G1    | 6 | 1 | 0.755913109  | 4.739602087 | OK | 0 | 158.3813099 | 0.160656493 | 0 |
| UPP1      | 6 | 1 | 0.987654746  | 5.478302    | OK | 0 | 276.4968601 | 0.280478008 | 0 |
| USP53     | 6 | 1 | -0.294295415 | 4.198180197 | OK | 0 | 110.5725745 | 0.112156381 | 0 |
| USP6NL    | 6 | 1 | -0.140359505 | 4.187330244 | OK | 0 | 222.892655  | 0.226095583 | 0 |

|             |   |   |              |              |    |   |             |             |   |
|-------------|---|---|--------------|--------------|----|---|-------------|-------------|---|
| VPS37B      | 6 | 1 | -0.272229537 | 4.806070326  | OK | 0 | 195.324401  | 0.198132008 | 0 |
| WWC1        | 6 | 1 | -0.359070047 | 4.546818732  | OK | 0 | 144.8576233 | 0.146932437 | 0 |
| YOD1        | 6 | 1 | 0.466948107  | 5.435899733  | OK | 0 | 269.6401227 | 0.273509689 | 0 |
| ZNF365      | 6 | 1 | 0.819224112  | 5.448735236  | OK | 0 | 540.6312193 | 0.548271657 | 0 |
| ZNF426      | 6 | 1 | 0.161319927  | 5.103723524  | OK | 0 | 153.103905  | 0.155296108 | 0 |
| ZNF430      | 6 | 1 | 0.2264985    | 5.644870756  | OK | 0 | 64.31879868 | 0.065234428 | 0 |
| ZNF431      | 6 | 1 | 0.287737385  | 5.576566695  | OK | 0 | 177.384566  | 0.179932189 | 0 |
| ZNF714      | 6 | 1 | 0.213167504  | 5.632364271  | OK | 0 | 66.0553414  | 0.066993126 | 0 |
| ZNF92       | 6 | 1 | 0.212481812  | 5.639434813  | OK | 0 | 78.66965378 | 0.079788    | 0 |
| ALOX15      | 7 | 1 | -0.328905209 | -0.238170149 | OK | 0 | 434.6651069 | 0.440929562 | 0 |
| ANO1        | 7 | 1 | -0.142525061 | -0.502690317 | OK | 0 | 320.4936555 | 0.325110881 | 0 |
| APOL1       | 7 | 1 | -0.09544526  | -1.116366388 | OK | 0 | 136.483189  | 0.138440431 | 0 |
| ARNTL2      | 7 | 1 | -0.198494777 | -0.438445808 | OK | 0 | 264.2569026 | 0.268061191 | 0 |
| ATP13A5     | 7 | 1 | -0.51693128  | -0.850231887 | OK | 0 | 130.64077   | 0.132510822 | 0 |
| ATP8B1      | 7 | 1 | 0.089923278  | -0.575456621 | OK | 0 | 230.211679  | 0.233524191 | 0 |
| BCL2L15     | 7 | 1 | -0.499163374 | -0.511592628 | OK | 0 | 219.2263121 | 0.222379404 | 0 |
| C12orf75    | 7 | 1 | -0.566905841 | -1.349287273 | OK | 0 | 160.5192575 | 0.162824817 | 0 |
| CA2         | 7 | 1 | -0.109168097 | -1.401830198 | OK | 0 | 236.2899464 | 0.239690891 | 0 |
| CADM1       | 7 | 1 | -0.27633129  | -0.56154895  | OK | 0 | 118.3391683 | 0.120032773 | 0 |
| CAMK1D      | 7 | 1 | -0.076294109 | -0.479494096 | OK | 0 | 217.4202527 | 0.220546531 | 0 |
| CCL26       | 7 | 1 | -0.31754516  | -0.543848993 | OK | 0 | 302.0231403 | 0.306374111 | 0 |
| CDH3        | 7 | 1 | -0.308561667 | -1.404706718 | OK | 0 | 180.9037785 | 0.183503227 | 0 |
| CES2        | 7 | 1 | 0.447689608  | -0.480618717 | OK | 0 | 470.9342532 | 0.477725055 | 0 |
| CHL1        | 7 | 1 | -0.380515679 | -0.414757253 | OK | 0 | 237.1249703 | 0.240534647 | 0 |
| CISH        | 7 | 1 | -0.40716122  | -1.215509893 | OK | 0 | 69.58338323 | 0.070574812 | 0 |
| CLDN1       | 7 | 1 | 0.034546808  | -0.951485159 | OK | 0 | 201.4444818 | 0.204342031 | 0 |
| CTSC        | 7 | 1 | -0.546894416 | -1.069386961 | OK | 0 | 293.4937114 | 0.297720553 | 0 |
| CYP2S1      | 7 | 1 | -0.078554555 | -0.884851934 | OK | 0 | 150.6675981 | 0.152829389 | 0 |
| CYP7B1      | 7 | 1 | -0.493104681 | -0.696304084 | OK | 0 | 294.3818033 | 0.298622115 | 0 |
| DPYD        | 7 | 1 | -0.291733369 | -0.408997537 | OK | 0 | 253.6263682 | 0.257276923 | 0 |
| DSG3        | 7 | 1 | 0.633452803  | -0.60170603  | OK | 0 | 372.6045303 | 0.37797198  | 0 |
| DSP         | 7 | 1 | 0.566945211  | -0.727092745 | OK | 0 | 236.2433509 | 0.239635524 | 0 |
| DUOX1       | 7 | 1 | 0.201838032  | -0.241605522 | OK | 0 | 326.2683787 | 0.330969373 | 0 |
| EPPK1       | 7 | 1 | -0.343518361 | -0.374264957 | OK | 0 | 266.1956611 | 0.270023892 | 0 |
| GALNT5      | 7 | 1 | -0.068886503 | -0.770165922 | OK | 0 | 214.1991008 | 0.217279884 | 0 |
| HAS3        | 7 | 1 | -0.102325662 | -0.901779653 | OK | 0 | 143.95017   | 0.146014356 | 0 |
| HLF         | 7 | 1 | -0.349716767 | -1.28568411  | OK | 0 | 174.4748259 | 0.176981969 | 0 |
| HPGD        | 7 | 1 | -0.614512786 | -0.868858816 | OK | 0 | 354.9179683 | 0.360032332 | 0 |
| KCNJ2       | 7 | 1 | -0.456494793 | -1.242721321 | OK | 0 | 130.4389326 | 0.132310141 | 0 |
| LINC01497   | 7 | 1 | -0.586439356 | -1.015957834 | OK | 0 | 193.505593  | 0.196287013 | 0 |
| LTA4H       | 7 | 1 | 0.050769643  | -0.249021293 | OK | 0 | 348.1073431 | 0.353123521 | 0 |
| MDK         | 7 | 1 | -0.549268469 | -1.18397999  | OK | 0 | 188.5971158 | 0.191309067 | 0 |
| MPP7        | 7 | 1 | 0.160970286  | -0.526329757 | OK | 0 | 364.668985  | 0.369924725 | 0 |
| MX1         | 7 | 1 | 0.046813623  | -0.70668626  | OK | 0 | 268.5388615 | 0.272405691 | 0 |
| MYH9        | 7 | 1 | 0.247705177  | -0.853569986 | OK | 0 | 257.7729451 | 0.261484334 | 0 |
| NEFL        | 7 | 1 | -0.290648207 | -0.313233139 | OK | 0 | 177.4029801 | 0.179948359 | 0 |
| NTRK2       | 7 | 1 | -0.4455484   | -1.274094106 | OK | 0 | 213.3491183 | 0.216418684 | 0 |
| P2RY1       | 7 | 1 | 0.238220826  | -0.610698225 | OK | 0 | 239.3458131 | 0.242790812 | 0 |
| PDZK1IP1    | 7 | 1 | -0.332458004 | 0.007324456  | OK | 0 | 292.720704  | 0.29693664  | 0 |
| PHLDB2      | 7 | 1 | -0.070421621 | -1.448131801 | OK | 0 | 99.34597926 | 0.100765568 | 0 |
| PMCH        | 7 | 1 | -0.593682631 | -0.713761808 | OK | 0 | 68.39893734 | 0.069362999 | 0 |
| SAMHD1      | 7 | 1 | -0.542641743 | -0.719862463 | OK | 0 | 227.8986842 | 0.231176789 | 0 |
| SCIN        | 7 | 1 | -0.492592796 | -0.708209755 | OK | 0 | 469.4131307 | 0.476182218 | 0 |
| SECTM1      | 7 | 1 | -0.249639257 | -0.448442222 | OK | 0 | 136.333547  | 0.138286551 | 0 |
| SERPINB3    | 7 | 1 | -0.680836901 | -0.759157659 | OK | 0 | 480.0374551 | 0.486955965 | 0 |
| SERPINB4    | 7 | 1 | -0.633898958 | -0.658208133 | OK | 0 | 367.927037  | 0.373230122 | 0 |
| SERPINE2    | 7 | 1 | -0.592544659 | -0.915153267 | OK | 0 | 174.5971759 | 0.177105422 | 0 |
| SFRP1       | 7 | 1 | -0.557473763 | -1.054627182 | OK | 0 | 216.6401506 | 0.219756248 | 0 |
| SGK1        | 7 | 1 | -0.502075061 | -1.145987274 | OK | 0 | 252.2459678 | 0.25587756  | 0 |
| SH3RF2      | 7 | 1 | -0.077612981 | -0.703767778 | OK | 0 | 244.2873354 | 0.247803661 | 0 |
| SLC26A4-AS1 | 7 | 1 | -0.39774464  | -0.35791135  | OK | 0 | 218.6808982 | 0.221817728 | 0 |
| SPARCL1     | 7 | 1 | -0.477817878 | -1.061317922 | OK | 0 | 78.91544755 | 0.080039264 | 0 |
| SPTBN1      | 7 | 1 | 0.28666778   | -0.717245819 | OK | 0 | 247.5870723 | 0.25115134  | 0 |
| SYNPO       | 7 | 1 | -0.298034295 | -1.181150676 | OK | 0 | 122.6287639 | 0.124385346 | 0 |
| TFPI        | 7 | 1 | -0.345505699 | -1.25912595  | OK | 0 | 66.9720114  | 0.067924272 | 0 |
| TFRC        | 7 | 1 | 0.405159608  | -0.763397218 | OK | 0 | 175.4500203 | 0.177971262 | 0 |
| THBD        | 7 | 1 | 0.039195374  | -1.084187748 | OK | 0 | 199.7149552 | 0.202586275 | 0 |
| TMPRSS11A   | 7 | 1 | 0.105847434  | -0.249421121 | OK | 0 | 361.7085279 | 0.36692124  | 0 |
| TNFAIP6     | 7 | 1 | -0.588265404 | -0.733052971 | OK | 0 | 208.3303277 | 0.211322126 | 0 |
| ZFP36L1     | 7 | 1 | 0.786903456  | -0.87909341  | OK | 0 | 378.064425  | 0.383510027 | 0 |

**Supplemental Table 4.** Gene expression profile of module 7 genes in EoE vs healthy subjects.

| gene        | meanEoE     | meanHC      | log2FC      | status | p_value | morans_test_statistic | morans_I    | q_value |
|-------------|-------------|-------------|-------------|--------|---------|-----------------------|-------------|---------|
| TNFAIP6     | 0.966075106 | 3.85E-05    | 14.61634424 | OK     | 0       | 208.3303277           | 0.211322126 | 0       |
| ALOX15      | 1.961654088 | 0.0007248   | 11.40220098 | OK     | 0       | 434.6651069           | 0.440929562 | 0       |
| PMCH        | 0.202486736 | 0.000257418 | 9.619501201 | OK     | 0       | 68.39893734           | 0.069362999 | 0       |
| CCL26       | 6.859650624 | 0.016739443 | 8.678739727 | OK     | 0       | 302.0231403           | 0.306374111 | 0       |
| SLC26A4-AS1 | 0.120048362 | 0.000586635 | 7.676937321 | OK     | 0       | 218.6808982           | 0.221817728 | 0       |
| ATP13A5     | 0.15791579  | 0.001201737 | 7.037890216 | OK     | 0       | 130.64077             | 0.132510822 | 0       |
| ANO1        | 0.836764412 | 0.025489408 | 5.03685174  | OK     | 0       | 320.4936555           | 0.325110881 | 0       |
| LINC01497   | 0.661007481 | 0.02831416  | 4.545070971 | OK     | 0       | 193.5055593           | 0.196287013 | 0       |
| EPPK1       | 0.26539871  | 0.01543172  | 4.104190539 | OK     | 0       | 266.1956611           | 0.270023892 | 0       |
| CA2         | 1.371843303 | 0.080025119 | 4.099518982 | OK     | 0       | 236.2899464           | 0.239690891 | 0       |
| SERPINB4    | 6.673203074 | 0.427245606 | 3.965241846 | OK     | 0       | 367.927037            | 0.373230122 | 0       |
| NEFL        | 0.280173501 | 0.018845725 | 3.894011331 | OK     | 0       | 177.4029801           | 0.179948359 | 0       |
| SYNPO       | 0.235892522 | 0.016821057 | 3.809789454 | OK     | 0       | 122.6287639           | 0.124385346 | 0       |
| SCIN        | 3.688673568 | 0.275632567 | 3.742283858 | OK     | 0       | 469.4131307           | 0.476182218 | 0       |
| BCL2L15     | 0.386922308 | 0.030522998 | 3.664075337 | OK     | 0       | 219.2263121           | 0.222379404 | 0       |
| SFRP1       | 0.617311839 | 0.057586647 | 3.422193231 | OK     | 0       | 216.6401506           | 0.219756248 | 0       |
| CTSC        | 3.435824221 | 0.360297523 | 3.253395592 | OK     | 0       | 293.4937114           | 0.297720553 | 0       |
| CYP7B1      | 0.957796831 | 0.114809808 | 3.06047377  | OK     | 0       | 294.3818033           | 0.298622115 | 0       |
| KCNJ2       | 0.58025804  | 0.073125635 | 2.988245461 | OK     | 0       | 130.4389326           | 0.132310141 | 0       |
| SGK1        | 2.223951321 | 0.316300363 | 2.813758096 | OK     | 0       | 252.2459678           | 0.25587756  | 0       |
| MDK         | 0.882211769 | 0.13098338  | 2.751741244 | OK     | 0       | 188.5971158           | 0.191309067 | 0       |
| NTRK2       | 0.94801279  | 0.143535812 | 2.723495785 | OK     | 0       | 213.3491183           | 0.216418684 | 0       |
| CISH        | 0.225675308 | 0.035958991 | 2.649824121 | OK     | 0       | 69.58338323           | 0.070574812 | 0       |
| CADM1       | 0.144856241 | 0.024142202 | 2.584992696 | OK     | 0       | 118.3391683           | 0.120032773 | 0       |
| HAS3        | 0.200475746 | 0.034917142 | 2.52142031  | OK     | 0       | 143.95017             | 0.146014356 | 0       |
| SECTM1      | 0.169999339 | 0.031296673 | 2.441447924 | OK     | 0       | 136.333547            | 0.138286551 | 0       |
| PHLDB2      | 0.153398438 | 0.02979627  | 2.364080168 | OK     | 0       | 99.34597926           | 0.100765568 | 0       |
| APOL1       | 0.285596061 | 0.056620866 | 2.334570374 | OK     | 0       | 136.483189            | 0.138440431 | 0       |
| CHL1        | 0.338550396 | 0.071509407 | 2.243165654 | OK     | 0       | 237.1249703           | 0.240534647 | 0       |
| DPYD        | 0.493134501 | 0.106768169 | 2.207499592 | OK     | 0       | 253.6263682           | 0.257276923 | 0       |
| DUOX1       | 1.171431477 | 0.253832096 | 2.206326155 | OK     | 0       | 326.2683787           | 0.330969373 | 0       |
| PDZK1IP1    | 3.354050846 | 0.74706284  | 2.166603052 | OK     | 0       | 292.720704            | 0.29693664  | 0       |
| CAMK1D      | 0.299012821 | 0.06723627  | 2.152895754 | OK     | 0       | 217.4202527           | 0.220546531 | 0       |
| SH3RF2      | 0.653008701 | 0.161890923 | 2.012080117 | OK     | 0       | 244.2873354           | 0.247803661 | 0       |
| C12orf75    | 0.453379065 | 0.112809698 | 2.006826682 | OK     | 0       | 160.5192575           | 0.162824817 | 0       |
| GALNT5      | 0.476173378 | 0.130597042 | 1.866364744 | OK     | 0       | 214.1991008           | 0.217279884 | 0       |
| SAMHD1      | 0.346029726 | 0.096709186 | 1.839171147 | OK     | 0       | 227.8986842           | 0.231176789 | 0       |
| LTA4H       | 1.996930207 | 0.570936273 | 1.806382283 | OK     | 0       | 348.1073431           | 0.353123521 | 0       |
| MPP7        | 1.046935282 | 0.307842937 | 1.765905889 | OK     | 0       | 364.668985            | 0.369924725 | 0       |
| SERPINB3    | 17.48953192 | 5.324917426 | 1.71566062  | OK     | 0       | 480.0374551           | 0.486955965 | 0       |
| SERPINE2    | 0.356731454 | 0.108896618 | 1.711879278 | OK     | 0       | 174.5971759           | 0.177105422 | 0       |
| MX1         | 0.797845799 | 0.246847702 | 1.692488724 | OK     | 0       | 268.5388615           | 0.272405691 | 0       |
| MYH9        | 1.216837583 | 0.379623725 | 1.680494553 | OK     | 0       | 257.7729451           | 0.261484334 | 0       |
| ATP8B1      | 0.488132901 | 0.158051825 | 1.626876298 | OK     | 0       | 230.211679            | 0.233524191 | 0       |
| P2RY1       | 0.656319749 | 0.21307677  | 1.623025526 | OK     | 0       | 239.3458131           | 0.242790812 | 0       |
| SPTBN1      | 0.839628846 | 0.273834653 | 1.616446703 | OK     | 0       | 247.5870723           | 0.25115134  | 0       |
| CDH3        | 0.359101344 | 0.11811826  | 1.60415904  | OK     | 0       | 180.9037785           | 0.183503227 | 0       |
| THBD        | 0.404966324 | 0.134632233 | 1.588778084 | OK     | 0       | 199.7149552           | 0.202586275 | 0       |
| HPGD        | 3.934350587 | 1.313569137 | 1.582633386 | OK     | 0       | 354.9179683           | 0.360032332 | 0       |
| TFPI        | 0.120224359 | 0.041967708 | 1.51837767  | OK     | 0       | 66.9720114            | 0.067924272 | 0       |
| HLF         | 0.498670622 | 0.178091332 | 1.485469908 | OK     | 0       | 174.4748259           | 0.176981969 | 0       |
| CLDN1       | 0.710253872 | 0.256735722 | 1.468050745 | OK     | 0       | 201.4444818           | 0.204342031 | 0       |
| SPARCL1     | 0.13990251  | 0.054755911 | 1.353335215 | OK     | 0       | 78.91544755           | 0.080039264 | 0       |
| CYP2S1      | 0.24700796  | 0.099058602 | 1.318203369 | OK     | 0       | 150.6675981           | 0.152829389 | 0       |
| TMPRSS11A   | 0.897482841 | 0.377530588 | 1.249290817 | OK     | 0       | 361.7085279           | 0.36692124  | 0       |
| CES2        | 2.138066605 | 0.953794755 | 1.164556043 | OK     | 0       | 470.9342532           | 0.477725055 | 0       |
| DSG3        | 4.166980771 | 1.902058482 | 1.131440838 | OK     | 0       | 372.6045303           | 0.37797198  | 0       |
| ARNTL2      | 0.553917381 | 0.277874538 | 0.995237163 | OK     | 0       | 264.2569026           | 0.268061191 | 0       |

|         |             |             |             |    |   |             |             |   |
|---------|-------------|-------------|-------------|----|---|-------------|-------------|---|
| DSP     | 15.0345425  | 7.578231045 | 0.988347937 | OK | 0 | 236.2433509 | 0.239635524 | 0 |
| TFRC    | 0.392033289 | 0.209336069 | 0.90515525  | OK | 0 | 175.4500203 | 0.177971262 | 0 |
| ZFP36L1 | 5.059103183 | 2.971624788 | 0.767629698 | OK | 0 | 378.064425  | 0.383510027 | 0 |

**Supplemental Table 5.** Identification of SOX2 and/or KLF5 downstream targets from Enrichr databases and literature-based analyses.

| <b>gene</b> | <b>source</b>                                         | <b>regulator</b> |
|-------------|-------------------------------------------------------|------------------|
| CACNA2D4    | Enrichr CHEA_2022: SOX2 20726797 ChIP-Seq SW620 Human | SOX2             |
| KIAA1586    | Enrichr CHEA_2022: SOX2 20726797 ChIP-Seq SW620 Human | SOX2             |
| ISL1        | Enrichr CHEA_2022: SOX2 20726797 ChIP-Seq SW620 Human | SOX2             |
| LARP6       | Enrichr CHEA_2022: SOX2 20726797 ChIP-Seq SW620 Human | SOX2             |
| L1CAM       | Enrichr CHEA_2022: SOX2 20726797 ChIP-Seq SW620 Human | SOX2             |
| SPINT2      | Enrichr CHEA_2022: SOX2 20726797 ChIP-Seq SW620 Human | SOX2             |
| ASPHD1      | Enrichr CHEA_2022: SOX2 20726797 ChIP-Seq SW620 Human | SOX2             |
| SPINT1      | Enrichr CHEA_2022: SOX2 20726797 ChIP-Seq SW620 Human | SOX2             |
| FEZ2        | Enrichr CHEA_2022: SOX2 20726797 ChIP-Seq SW620 Human | SOX2             |
| SCO1        | Enrichr CHEA_2022: SOX2 20726797 ChIP-Seq SW620 Human | SOX2             |
| ATF3        | Enrichr CHEA_2022: SOX2 20726797 ChIP-Seq SW620 Human | SOX2             |
| SAMD9       | Enrichr CHEA_2022: SOX2 20726797 ChIP-Seq SW620 Human | SOX2             |
| HPGD        | Enrichr CHEA_2022: SOX2 20726797 ChIP-Seq SW620 Human | SOX2             |
| PON3        | Enrichr CHEA_2022: SOX2 20726797 ChIP-Seq SW620 Human | SOX2             |
| CRABP2      | Enrichr CHEA_2022: SOX2 20726797 ChIP-Seq SW620 Human | SOX2             |
| TFPI        | Enrichr CHEA_2022: SOX2 20726797 ChIP-Seq SW620 Human | SOX2             |
| UACA        | Enrichr CHEA_2022: SOX2 20726797 ChIP-Seq SW620 Human | SOX2             |
| SPDEF       | Enrichr CHEA_2022: SOX2 20726797 ChIP-Seq SW620 Human | SOX2             |
| TFPT        | Enrichr CHEA_2022: SOX2 20726797 ChIP-Seq SW620 Human | SOX2             |
| DPYSL3      | Enrichr CHEA_2022: SOX2 20726797 ChIP-Seq SW620 Human | SOX2             |
| ZNF19       | Enrichr CHEA_2022: SOX2 20726797 ChIP-Seq SW620 Human | SOX2             |
| JAG1        | Enrichr CHEA_2022: SOX2 20726797 ChIP-Seq SW620 Human | SOX2             |
| NEBL        | Enrichr CHEA_2022: SOX2 20726797 ChIP-Seq SW620 Human | SOX2             |
| ATP6AP2     | Enrichr CHEA_2022: SOX2 20726797 ChIP-Seq SW620 Human | SOX2             |
| ATP6AP1     | Enrichr CHEA_2022: SOX2 20726797 ChIP-Seq SW620 Human | SOX2             |
| NR2F2       | Enrichr CHEA_2022: SOX2 20726797 ChIP-Seq SW620 Human | SOX2             |
| PBX3        | Enrichr CHEA_2022: SOX2 20726797 ChIP-Seq SW620 Human | SOX2             |
| VPS13A      | Enrichr CHEA_2022: SOX2 20726797 ChIP-Seq SW620 Human | SOX2             |
| SUPV3L1     | Enrichr CHEA_2022: SOX2 20726797 ChIP-Seq SW620 Human | SOX2             |
| VANGL1      | Enrichr CHEA_2022: SOX2 20726797 ChIP-Seq SW620 Human | SOX2             |
| BCR         | Enrichr CHEA_2022: SOX2 20726797 ChIP-Seq SW620 Human | SOX2             |
| PHF20L1     | Enrichr CHEA_2022: SOX2 20726797 ChIP-Seq SW620 Human | SOX2             |
| PPFIBP2     | Enrichr CHEA_2022: SOX2 20726797 ChIP-Seq SW620 Human | SOX2             |
| FAM111A     | Enrichr CHEA_2022: SOX2 20726797 ChIP-Seq SW620 Human | SOX2             |
| PLSCR1      | Enrichr CHEA_2022: SOX2 20726797 ChIP-Seq SW620 Human | SOX2             |
| PKIA        | Enrichr CHEA_2022: SOX2 20726797 ChIP-Seq SW620 Human | SOX2             |
| SFXN3       | Enrichr CHEA_2022: SOX2 20726797 ChIP-Seq SW620 Human | SOX2             |
| CHST5       | Enrichr CHEA_2022: SOX2 20726797 ChIP-Seq SW620 Human | SOX2             |
| PKIG        | Enrichr CHEA_2022: SOX2 20726797 ChIP-Seq SW620 Human | SOX2             |
| ATF4        | Enrichr CHEA_2022: SOX2 20726797 ChIP-Seq SW620 Human | SOX2             |
| ATF5        | Enrichr CHEA_2022: SOX2 20726797 ChIP-Seq SW620 Human | SOX2             |
| CHST4       | Enrichr CHEA_2022: SOX2 20726797 ChIP-Seq SW620 Human | SOX2             |
| CDCA2       | Enrichr CHEA_2022: SOX2 20726797 ChIP-Seq SW620 Human | SOX2             |
| PDGFC       | Enrichr CHEA_2022: SOX2 20726797 ChIP-Seq SW620 Human | SOX2             |
| ZNF22       | Enrichr CHEA_2022: SOX2 20726797 ChIP-Seq SW620 Human | SOX2             |
| GATA6       | Enrichr CHEA_2022: SOX2 20726797 ChIP-Seq SW620 Human | SOX2             |
| PDGFA       | Enrichr CHEA_2022: SOX2 20726797 ChIP-Seq SW620 Human | SOX2             |
| F11R        | Enrichr CHEA_2022: SOX2 20726797 ChIP-Seq SW620 Human | SOX2             |
| GATA3       | Enrichr CHEA_2022: SOX2 20726797 ChIP-Seq SW620 Human | SOX2             |
| ALKBH8      | Enrichr CHEA_2022: SOX2 20726797 ChIP-Seq SW620 Human | SOX2             |
| GATA2       | Enrichr CHEA_2022: SOX2 20726797 ChIP-Seq SW620 Human | SOX2             |
| ZNF26       | Enrichr CHEA_2022: SOX2 20726797 ChIP-Seq SW620 Human | SOX2             |
| ALKBH6      | Enrichr CHEA_2022: SOX2 20726797 ChIP-Seq SW620 Human | SOX2             |
| EPB41L1     | Enrichr CHEA_2022: SOX2 20726797 ChIP-Seq SW620 Human | SOX2             |
| ZC3H12A     | Enrichr CHEA_2022: SOX2 20726797 ChIP-Seq SW620 Human | SOX2             |



|          |                                                       |      |
|----------|-------------------------------------------------------|------|
| EPB41L2  | Enrichr CHEA_2022: SOX2 20726797 ChIP-Seq SW620 Human | SOX2 |
| FAM110C  | Enrichr CHEA_2022: SOX2 20726797 ChIP-Seq SW620 Human | SOX2 |
| NKX3-1   | Enrichr CHEA_2022: SOX2 20726797 ChIP-Seq SW620 Human | SOX2 |
| PIP5K1B  | Enrichr CHEA_2022: SOX2 20726797 ChIP-Seq SW620 Human | SOX2 |
| PRKACB   | Enrichr CHEA_2022: SOX2 20726797 ChIP-Seq SW620 Human | SOX2 |
| ZNF488   | Enrichr CHEA_2022: SOX2 20726797 ChIP-Seq SW620 Human | SOX2 |
| DUSP5    | Enrichr CHEA_2022: SOX2 20726797 ChIP-Seq SW620 Human | SOX2 |
| FUCA1    | Enrichr CHEA_2022: SOX2 20726797 ChIP-Seq SW620 Human | SOX2 |
| JUN      | Enrichr CHEA_2022: SOX2 20726797 ChIP-Seq SW620 Human | SOX2 |
| DUSP4    | Enrichr CHEA_2022: SOX2 20726797 ChIP-Seq SW620 Human | SOX2 |
| JUP      | Enrichr CHEA_2022: SOX2 20726797 ChIP-Seq SW620 Human | SOX2 |
| FN1      | Enrichr CHEA_2022: SOX2 20726797 ChIP-Seq SW620 Human | SOX2 |
| DCBLD2   | Enrichr CHEA_2022: SOX2 20726797 ChIP-Seq SW620 Human | SOX2 |
| TMEFF1   | Enrichr CHEA_2022: SOX2 20726797 ChIP-Seq SW620 Human | SOX2 |
| SLC7A5   | Enrichr CHEA_2022: SOX2 20726797 ChIP-Seq SW620 Human | SOX2 |
| CENPF    | Enrichr CHEA_2022: SOX2 20726797 ChIP-Seq SW620 Human | SOX2 |
| SLC7A7   | Enrichr CHEA_2022: SOX2 20726797 ChIP-Seq SW620 Human | SOX2 |
| SLC7A8   | Enrichr CHEA_2022: SOX2 20726797 ChIP-Seq SW620 Human | SOX2 |
| DPYD     | Enrichr CHEA_2022: SOX2 20726797 ChIP-Seq SW620 Human | SOX2 |
| FXVD6    | Enrichr CHEA_2022: SOX2 20726797 ChIP-Seq SW620 Human | SOX2 |
| RAPGEF4  | Enrichr CHEA_2022: SOX2 20726797 ChIP-Seq SW620 Human | SOX2 |
| RAPGEF5  | Enrichr CHEA_2022: SOX2 20726797 ChIP-Seq SW620 Human | SOX2 |
| LIMS2    | Enrichr CHEA_2022: SOX2 20726797 ChIP-Seq SW620 Human | SOX2 |
| TFCP2L1  | Enrichr CHEA_2022: SOX2 20726797 ChIP-Seq SW620 Human | SOX2 |
| ZC3HAV1  | Enrichr CHEA_2022: SOX2 20726797 ChIP-Seq SW620 Human | SOX2 |
| SLC7A1   | Enrichr CHEA_2022: SOX2 20726797 ChIP-Seq SW620 Human | SOX2 |
| HOXC13   | Enrichr CHEA_2022: SOX2 20726797 ChIP-Seq SW620 Human | SOX2 |
| SLC7A2   | Enrichr CHEA_2022: SOX2 20726797 ChIP-Seq SW620 Human | SOX2 |
| HOXC10   | Enrichr CHEA_2022: SOX2 20726797 ChIP-Seq SW620 Human | SOX2 |
| HLCS     | Enrichr CHEA_2022: SOX2 20726797 ChIP-Seq SW620 Human | SOX2 |
| SHH      | Enrichr CHEA_2022: SOX2 20726797 ChIP-Seq SW620 Human | SOX2 |
| PANX1    | Enrichr CHEA_2022: SOX2 20726797 ChIP-Seq SW620 Human | SOX2 |
| DLGAP1   | Enrichr CHEA_2022: SOX2 20726797 ChIP-Seq SW620 Human | SOX2 |
| ZNF468   | Enrichr CHEA_2022: SOX2 20726797 ChIP-Seq SW620 Human | SOX2 |
| SLC18A2  | Enrichr CHEA_2022: SOX2 20726797 ChIP-Seq SW620 Human | SOX2 |
| PCMTD2   | Enrichr CHEA_2022: SOX2 20726797 ChIP-Seq SW620 Human | SOX2 |
| EGLN2    | Enrichr CHEA_2022: SOX2 20726797 ChIP-Seq SW620 Human | SOX2 |
| ATAD2    | Enrichr CHEA_2022: SOX2 20726797 ChIP-Seq SW620 Human | SOX2 |
| CDKL5    | Enrichr CHEA_2022: SOX2 20726797 ChIP-Seq SW620 Human | SOX2 |
| PPARA    | Enrichr CHEA_2022: SOX2 20726797 ChIP-Seq SW620 Human | SOX2 |
| DGAT1    | Enrichr CHEA_2022: SOX2 20726797 ChIP-Seq SW620 Human | SOX2 |
| SNX25    | Enrichr CHEA_2022: SOX2 20726797 ChIP-Seq SW620 Human | SOX2 |
| BGN      | Enrichr CHEA_2022: SOX2 20726797 ChIP-Seq SW620 Human | SOX2 |
| ADAM10   | Enrichr CHEA_2022: SOX2 20726797 ChIP-Seq SW620 Human | SOX2 |
| SLC39A14 | Enrichr CHEA_2022: SOX2 20726797 ChIP-Seq SW620 Human | SOX2 |
| DAB2IP   | Enrichr CHEA_2022: SOX2 20726797 ChIP-Seq SW620 Human | SOX2 |
| MYBBP1A  | Enrichr CHEA_2022: SOX2 20726797 ChIP-Seq SW620 Human | SOX2 |
| ADAM17   | Enrichr CHEA_2022: SOX2 20726797 ChIP-Seq SW620 Human | SOX2 |
| LARS2    | Enrichr CHEA_2022: SOX2 20726797 ChIP-Seq SW620 Human | SOX2 |
| APEX2    | Enrichr CHEA_2022: SOX2 20726797 ChIP-Seq SW620 Human | SOX2 |
| ETNK1    | Enrichr CHEA_2022: SOX2 20726797 ChIP-Seq SW620 Human | SOX2 |
| PPARG    | Enrichr CHEA_2022: SOX2 20726797 ChIP-Seq SW620 Human | SOX2 |
| TSR1     | Enrichr CHEA_2022: SOX2 20726797 ChIP-Seq SW620 Human | SOX2 |
| LGR6     | Enrichr CHEA_2022: SOX2 20726797 ChIP-Seq SW620 Human | SOX2 |
| PPARD    | Enrichr CHEA_2022: SOX2 20726797 ChIP-Seq SW620 Human | SOX2 |
| LGR4     | Enrichr CHEA_2022: SOX2 20726797 ChIP-Seq SW620 Human | SOX2 |
| OAT      | Enrichr CHEA_2022: SOX2 20726797 ChIP-Seq SW620 Human | SOX2 |
| MTMR10   | Enrichr CHEA_2022: SOX2 20726797 ChIP-Seq SW620 Human | SOX2 |
| SNX10    | Enrichr CHEA_2022: SOX2 20726797 ChIP-Seq SW620 Human | SOX2 |

|          |                                                       |      |
|----------|-------------------------------------------------------|------|
| SMPD3    | Enrichr CHEA_2022: SOX2 20726797 ChIP-Seq SW620 Human | SOX2 |
| WRN      | Enrichr CHEA_2022: SOX2 20726797 ChIP-Seq SW620 Human | SOX2 |
| FGFR10P2 | Enrichr CHEA_2022: SOX2 20726797 ChIP-Seq SW620 Human | SOX2 |
| PLAGL1   | Enrichr CHEA_2022: SOX2 20726797 ChIP-Seq SW620 Human | SOX2 |
| AGR2     | Enrichr CHEA_2022: SOX2 20726797 ChIP-Seq SW620 Human | SOX2 |
| NUDT13   | Enrichr CHEA_2022: SOX2 20726797 ChIP-Seq SW620 Human | SOX2 |
| FADS1    | Enrichr CHEA_2022: SOX2 20726797 ChIP-Seq SW620 Human | SOX2 |
| MAP3K1   | Enrichr CHEA_2022: SOX2 20726797 ChIP-Seq SW620 Human | SOX2 |
| BIK      | Enrichr CHEA_2022: SOX2 20726797 ChIP-Seq SW620 Human | SOX2 |
| CORO2A   | Enrichr CHEA_2022: SOX2 20726797 ChIP-Seq SW620 Human | SOX2 |
| FBXO17   | Enrichr CHEA_2022: SOX2 20726797 ChIP-Seq SW620 Human | SOX2 |
| STX8     | Enrichr CHEA_2022: SOX2 20726797 ChIP-Seq SW620 Human | SOX2 |
| ATP11C   | Enrichr CHEA_2022: SOX2 20726797 ChIP-Seq SW620 Human | SOX2 |
| SDCBP2   | Enrichr CHEA_2022: SOX2 20726797 ChIP-Seq SW620 Human | SOX2 |
| WT1      | Enrichr CHEA_2022: SOX2 20726797 ChIP-Seq SW620 Human | SOX2 |
| MFNG     | Enrichr CHEA_2022: SOX2 20726797 ChIP-Seq SW620 Human | SOX2 |
| LY6E     | Enrichr CHEA_2022: SOX2 20726797 ChIP-Seq SW620 Human | SOX2 |
| PDCD4    | Enrichr CHEA_2022: SOX2 20726797 ChIP-Seq SW620 Human | SOX2 |
| PKP4     | Enrichr CHEA_2022: SOX2 20726797 ChIP-Seq SW620 Human | SOX2 |
| IL6ST    | Enrichr CHEA_2022: SOX2 20726797 ChIP-Seq SW620 Human | SOX2 |
| AGRN     | Enrichr CHEA_2022: SOX2 20726797 ChIP-Seq SW620 Human | SOX2 |
| FRK      | Enrichr CHEA_2022: SOX2 20726797 ChIP-Seq SW620 Human | SOX2 |
| ZNF430   | Enrichr CHEA_2022: SOX2 20726797 ChIP-Seq SW620 Human | SOX2 |
| NIP7     | Enrichr CHEA_2022: SOX2 20726797 ChIP-Seq SW620 Human | SOX2 |
| PDCD6    | Enrichr CHEA_2022: SOX2 20726797 ChIP-Seq SW620 Human | SOX2 |
| TSPAN31  | Enrichr CHEA_2022: SOX2 20726797 ChIP-Seq SW620 Human | SOX2 |
| ATP10B   | Enrichr CHEA_2022: SOX2 20726797 ChIP-Seq SW620 Human | SOX2 |
| PLOD2    | Enrichr CHEA_2022: SOX2 20726797 ChIP-Seq SW620 Human | SOX2 |
| FRY      | Enrichr CHEA_2022: SOX2 20726797 ChIP-Seq SW620 Human | SOX2 |
| EGFR     | Enrichr CHEA_2022: SOX2 20726797 ChIP-Seq SW620 Human | SOX2 |
| LAPTM4A  | Enrichr CHEA_2022: SOX2 20726797 ChIP-Seq SW620 Human | SOX2 |
| STX5     | Enrichr CHEA_2022: SOX2 20726797 ChIP-Seq SW620 Human | SOX2 |
| MAP3K8   | Enrichr CHEA_2022: SOX2 20726797 ChIP-Seq SW620 Human | SOX2 |
| ZNF420   | Enrichr CHEA_2022: SOX2 20726797 ChIP-Seq SW620 Human | SOX2 |
| NEK6     | Enrichr CHEA_2022: SOX2 20726797 ChIP-Seq SW620 Human | SOX2 |
| BNIP3L   | Enrichr CHEA_2022: SOX2 20726797 ChIP-Seq SW620 Human | SOX2 |
| SLC9A3R1 | Enrichr CHEA_2022: SOX2 20726797 ChIP-Seq SW620 Human | SOX2 |
| PIAS3    | Enrichr CHEA_2022: SOX2 20726797 ChIP-Seq SW620 Human | SOX2 |
| FBXO31   | Enrichr CHEA_2022: SOX2 20726797 ChIP-Seq SW620 Human | SOX2 |
| FBXO32   | Enrichr CHEA_2022: SOX2 20726797 ChIP-Seq SW620 Human | SOX2 |
| FBXO30   | Enrichr CHEA_2022: SOX2 20726797 ChIP-Seq SW620 Human | SOX2 |
| LCN2     | Enrichr CHEA_2022: SOX2 20726797 ChIP-Seq SW620 Human | SOX2 |
| BMP2K    | Enrichr CHEA_2022: SOX2 20726797 ChIP-Seq SW620 Human | SOX2 |
| MNAT1    | Enrichr CHEA_2022: SOX2 20726797 ChIP-Seq SW620 Human | SOX2 |
| SLC27A5  | Enrichr CHEA_2022: SOX2 20726797 ChIP-Seq SW620 Human | SOX2 |
| OSBPL1A  | Enrichr CHEA_2022: SOX2 20726797 ChIP-Seq SW620 Human | SOX2 |
| KCNE3    | Enrichr CHEA_2022: SOX2 20726797 ChIP-Seq SW620 Human | SOX2 |
| COL17A1  | Enrichr CHEA_2022: SOX2 20726797 ChIP-Seq SW620 Human | SOX2 |
| EIF4EBP1 | Enrichr CHEA_2022: SOX2 20726797 ChIP-Seq SW620 Human | SOX2 |
| LY75     | Enrichr CHEA_2022: SOX2 20726797 ChIP-Seq SW620 Human | SOX2 |
| MSI2     | Enrichr CHEA_2022: SOX2 20726797 ChIP-Seq SW620 Human | SOX2 |
| NHSL1    | Enrichr CHEA_2022: SOX2 20726797 ChIP-Seq SW620 Human | SOX2 |
| MED31    | Enrichr CHEA_2022: SOX2 20726797 ChIP-Seq SW620 Human | SOX2 |
| FNTA     | Enrichr CHEA_2022: SOX2 20726797 ChIP-Seq SW620 Human | SOX2 |
| UROD     | Enrichr CHEA_2022: SOX2 20726797 ChIP-Seq SW620 Human | SOX2 |
| NEK1     | Enrichr CHEA_2022: SOX2 20726797 ChIP-Seq SW620 Human | SOX2 |
| NEK2     | Enrichr CHEA_2022: SOX2 20726797 ChIP-Seq SW620 Human | SOX2 |
| NFATC2IP | Enrichr CHEA_2022: SOX2 20726797 ChIP-Seq SW620 Human | SOX2 |
| SLC2A4RG | Enrichr CHEA_2022: SOX2 20726797 ChIP-Seq SW620 Human | SOX2 |

|          |                                                       |      |
|----------|-------------------------------------------------------|------|
| ITGA5    | Enrichr CHEA_2022: SOX2 20726797 ChIP-Seq SW620 Human | SOX2 |
| ITGA3    | Enrichr CHEA_2022: SOX2 20726797 ChIP-Seq SW620 Human | SOX2 |
| TNFRSF19 | Enrichr CHEA_2022: SOX2 20726797 ChIP-Seq SW620 Human | SOX2 |
| TNFRSF1B | Enrichr CHEA_2022: SOX2 20726797 ChIP-Seq SW620 Human | SOX2 |
| TMBIM1   | Enrichr CHEA_2022: SOX2 20726797 ChIP-Seq SW620 Human | SOX2 |
| DBNDD2   | Enrichr CHEA_2022: SOX2 20726797 ChIP-Seq SW620 Human | SOX2 |
| TNFRSF21 | Enrichr CHEA_2022: SOX2 20726797 ChIP-Seq SW620 Human | SOX2 |
| LCP1     | Enrichr CHEA_2022: SOX2 20726797 ChIP-Seq SW620 Human | SOX2 |
| TMBIM4   | Enrichr CHEA_2022: SOX2 20726797 ChIP-Seq SW620 Human | SOX2 |
| PCCA     | Enrichr CHEA_2022: SOX2 20726797 ChIP-Seq SW620 Human | SOX2 |
| SP5      | Enrichr CHEA_2022: SOX2 20726797 ChIP-Seq SW620 Human | SOX2 |
| OGT      | Enrichr CHEA_2022: SOX2 20726797 ChIP-Seq SW620 Human | SOX2 |
| KCNK1    | Enrichr CHEA_2022: SOX2 20726797 ChIP-Seq SW620 Human | SOX2 |
| BCAR3    | Enrichr CHEA_2022: SOX2 20726797 ChIP-Seq SW620 Human | SOX2 |
| MCFD2    | Enrichr CHEA_2022: SOX2 20726797 ChIP-Seq SW620 Human | SOX2 |
| SHMT2    | Enrichr CHEA_2022: SOX2 20726797 ChIP-Seq SW620 Human | SOX2 |
| MLLT3    | Enrichr CHEA_2022: SOX2 20726797 ChIP-Seq SW620 Human | SOX2 |
| SPATA7   | Enrichr CHEA_2022: SOX2 20726797 ChIP-Seq SW620 Human | SOX2 |
| MLLT6    | Enrichr CHEA_2022: SOX2 20726797 ChIP-Seq SW620 Human | SOX2 |
| ALAD     | Enrichr CHEA_2022: SOX2 20726797 ChIP-Seq SW620 Human | SOX2 |
| RDH13    | Enrichr CHEA_2022: SOX2 20726797 ChIP-Seq SW620 Human | SOX2 |
| KIAA1522 | Enrichr CHEA_2022: SOX2 20726797 ChIP-Seq SW620 Human | SOX2 |
| BOK      | Enrichr CHEA_2022: SOX2 20726797 ChIP-Seq SW620 Human | SOX2 |
| BCAS1    | Enrichr CHEA_2022: SOX2 20726797 ChIP-Seq SW620 Human | SOX2 |
| NADK     | Enrichr CHEA_2022: SOX2 20726797 ChIP-Seq SW620 Human | SOX2 |
| MBIP     | Enrichr CHEA_2022: SOX2 20726797 ChIP-Seq SW620 Human | SOX2 |
| STYK1    | Enrichr CHEA_2022: SOX2 20726797 ChIP-Seq SW620 Human | SOX2 |
| GZMB     | Enrichr CHEA_2022: SOX2 20726797 ChIP-Seq SW620 Human | SOX2 |
| MID1IP1  | Enrichr CHEA_2022: SOX2 20726797 ChIP-Seq SW620 Human | SOX2 |
| MYO10    | Enrichr CHEA_2022: SOX2 20726797 ChIP-Seq SW620 Human | SOX2 |
| RNASET2  | Enrichr CHEA_2022: SOX2 20726797 ChIP-Seq SW620 Human | SOX2 |
| CABLES1  | Enrichr CHEA_2022: SOX2 20726797 ChIP-Seq SW620 Human | SOX2 |
| TM6SF1   | Enrichr CHEA_2022: SOX2 20726797 ChIP-Seq SW620 Human | SOX2 |
| TBX3     | Enrichr CHEA_2022: SOX2 20726797 ChIP-Seq SW620 Human | SOX2 |
| CFDP1    | Enrichr CHEA_2022: SOX2 20726797 ChIP-Seq SW620 Human | SOX2 |
| MYO1C    | Enrichr CHEA_2022: SOX2 20726797 ChIP-Seq SW620 Human | SOX2 |
| TSPAN14  | Enrichr CHEA_2022: SOX2 20726797 ChIP-Seq SW620 Human | SOX2 |
| MYO1B    | Enrichr CHEA_2022: SOX2 20726797 ChIP-Seq SW620 Human | SOX2 |
| TRIM36   | Enrichr CHEA_2022: SOX2 20726797 ChIP-Seq SW620 Human | SOX2 |
| KCTD15   | Enrichr CHEA_2022: SOX2 20726797 ChIP-Seq SW620 Human | SOX2 |
| KCTD12   | Enrichr CHEA_2022: SOX2 20726797 ChIP-Seq SW620 Human | SOX2 |
| TRIM32   | Enrichr CHEA_2022: SOX2 20726797 ChIP-Seq SW620 Human | SOX2 |
| PIK3AP1  | Enrichr CHEA_2022: SOX2 20726797 ChIP-Seq SW620 Human | SOX2 |
| TRIM34   | Enrichr CHEA_2022: SOX2 20726797 ChIP-Seq SW620 Human | SOX2 |
| PRPS2    | Enrichr CHEA_2022: SOX2 20726797 ChIP-Seq SW620 Human | SOX2 |
| SRC      | Enrichr CHEA_2022: SOX2 20726797 ChIP-Seq SW620 Human | SOX2 |
| MSLN     | Enrichr CHEA_2022: SOX2 20726797 ChIP-Seq SW620 Human | SOX2 |
| TRIM31   | Enrichr CHEA_2022: SOX2 20726797 ChIP-Seq SW620 Human | SOX2 |
| ITGB5    | Enrichr CHEA_2022: SOX2 20726797 ChIP-Seq SW620 Human | SOX2 |
| SRI      | Enrichr CHEA_2022: SOX2 20726797 ChIP-Seq SW620 Human | SOX2 |
| TSPAN12  | Enrichr CHEA_2022: SOX2 20726797 ChIP-Seq SW620 Human | SOX2 |
| NRGN     | Enrichr CHEA_2022: SOX2 20726797 ChIP-Seq SW620 Human | SOX2 |
| ZNRF1    | Enrichr CHEA_2022: SOX2 20726797 ChIP-Seq SW620 Human | SOX2 |
| ZNRF2    | Enrichr CHEA_2022: SOX2 20726797 ChIP-Seq SW620 Human | SOX2 |
| SRR      | Enrichr CHEA_2022: SOX2 20726797 ChIP-Seq SW620 Human | SOX2 |
| HHEX     | Enrichr CHEA_2022: SOX2 20726797 ChIP-Seq SW620 Human | SOX2 |
| KIAA1549 | Enrichr CHEA_2022: SOX2 20726797 ChIP-Seq SW620 Human | SOX2 |
| TRIM29   | Enrichr CHEA_2022: SOX2 20726797 ChIP-Seq SW620 Human | SOX2 |
| PTER     | Enrichr CHEA_2022: SOX2 20726797 ChIP-Seq SW620 Human | SOX2 |

|          |                                                       |      |
|----------|-------------------------------------------------------|------|
| IGF2BP1  | Enrichr CHEA_2022: SOX2 20726797 ChIP-Seq SW620 Human | SOX2 |
| ITGB8    | Enrichr CHEA_2022: SOX2 20726797 ChIP-Seq SW620 Human | SOX2 |
| ITGAV    | Enrichr CHEA_2022: SOX2 20726797 ChIP-Seq SW620 Human | SOX2 |
| FYN      | Enrichr CHEA_2022: SOX2 20726797 ChIP-Seq SW620 Human | SOX2 |
| ARL5B    | Enrichr CHEA_2022: SOX2 20726797 ChIP-Seq SW620 Human | SOX2 |
| SMARCA1  | Enrichr CHEA_2022: SOX2 20726797 ChIP-Seq SW620 Human | SOX2 |
| ACTN4    | Enrichr CHEA_2022: SOX2 20726797 ChIP-Seq SW620 Human | SOX2 |
| FBXO3    | Enrichr CHEA_2022: SOX2 20726797 ChIP-Seq SW620 Human | SOX2 |
| ARL14    | Enrichr CHEA_2022: SOX2 20726797 ChIP-Seq SW620 Human | SOX2 |
| SMARCA2  | Enrichr CHEA_2022: SOX2 20726797 ChIP-Seq SW620 Human | SOX2 |
| PPA2     | Enrichr CHEA_2022: SOX2 20726797 ChIP-Seq SW620 Human | SOX2 |
| SOAT1    | Enrichr CHEA_2022: SOX2 20726797 ChIP-Seq SW620 Human | SOX2 |
| NINJ2    | Enrichr CHEA_2022: SOX2 20726797 ChIP-Seq SW620 Human | SOX2 |
| MT1G     | Enrichr CHEA_2022: SOX2 20726797 ChIP-Seq SW620 Human | SOX2 |
| MT1H     | Enrichr CHEA_2022: SOX2 20726797 ChIP-Seq SW620 Human | SOX2 |
| TRIM16   | Enrichr CHEA_2022: SOX2 20726797 ChIP-Seq SW620 Human | SOX2 |
| CCDC82   | Enrichr CHEA_2022: SOX2 20726797 ChIP-Seq SW620 Human | SOX2 |
| RIN3     | Enrichr CHEA_2022: SOX2 20726797 ChIP-Seq SW620 Human | SOX2 |
| MT1F     | Enrichr CHEA_2022: SOX2 20726797 ChIP-Seq SW620 Human | SOX2 |
| SLC23A3  | Enrichr CHEA_2022: SOX2 20726797 ChIP-Seq SW620 Human | SOX2 |
| EPAS1    | Enrichr CHEA_2022: SOX2 20726797 ChIP-Seq SW620 Human | SOX2 |
| TAGLN    | Enrichr CHEA_2022: SOX2 20726797 ChIP-Seq SW620 Human | SOX2 |
| CCDC69   | Enrichr CHEA_2022: SOX2 20726797 ChIP-Seq SW620 Human | SOX2 |
| MYCBP2   | Enrichr CHEA_2022: SOX2 20726797 ChIP-Seq SW620 Human | SOX2 |
| CPNE8    | Enrichr CHEA_2022: SOX2 20726797 ChIP-Seq SW620 Human | SOX2 |
| IL27RA   | Enrichr CHEA_2022: SOX2 20726797 ChIP-Seq SW620 Human | SOX2 |
| STS      | Enrichr CHEA_2022: SOX2 20726797 ChIP-Seq SW620 Human | SOX2 |
| CDC23    | Enrichr CHEA_2022: SOX2 20726797 ChIP-Seq SW620 Human | SOX2 |
| BSG      | Enrichr CHEA_2022: SOX2 20726797 ChIP-Seq SW620 Human | SOX2 |
| CSNK1D   | Enrichr CHEA_2022: SOX2 20726797 ChIP-Seq SW620 Human | SOX2 |
| PEG10    | Enrichr CHEA_2022: SOX2 20726797 ChIP-Seq SW620 Human | SOX2 |
| STK38L   | Enrichr CHEA_2022: SOX2 20726797 ChIP-Seq SW620 Human | SOX2 |
| CCDC77   | Enrichr CHEA_2022: SOX2 20726797 ChIP-Seq SW620 Human | SOX2 |
| E2F8     | Enrichr CHEA_2022: SOX2 20726797 ChIP-Seq SW620 Human | SOX2 |
| EGR3     | Enrichr CHEA_2022: SOX2 20726797 ChIP-Seq SW620 Human | SOX2 |
| TGDS     | Enrichr CHEA_2022: SOX2 20726797 ChIP-Seq SW620 Human | SOX2 |
| MYO5A    | Enrichr CHEA_2022: SOX2 20726797 ChIP-Seq SW620 Human | SOX2 |
| RAB27B   | Enrichr CHEA_2022: SOX2 20726797 ChIP-Seq SW620 Human | SOX2 |
| MYO5B    | Enrichr CHEA_2022: SOX2 20726797 ChIP-Seq SW620 Human | SOX2 |
| CSNK1E   | Enrichr CHEA_2022: SOX2 20726797 ChIP-Seq SW620 Human | SOX2 |
| PTK6     | Enrichr CHEA_2022: SOX2 20726797 ChIP-Seq SW620 Human | SOX2 |
| EXT1     | Enrichr CHEA_2022: SOX2 20726797 ChIP-Seq SW620 Human | SOX2 |
| PTK2     | Enrichr CHEA_2022: SOX2 20726797 ChIP-Seq SW620 Human | SOX2 |
| CNKSR3   | Enrichr CHEA_2022: SOX2 20726797 ChIP-Seq SW620 Human | SOX2 |
| BTC      | Enrichr CHEA_2022: SOX2 20726797 ChIP-Seq SW620 Human | SOX2 |
| TLCD1    | Enrichr CHEA_2022: SOX2 20726797 ChIP-Seq SW620 Human | SOX2 |
| FBXL2    | Enrichr CHEA_2022: SOX2 20726797 ChIP-Seq SW620 Human | SOX2 |
| SDC1     | Enrichr CHEA_2022: SOX2 20726797 ChIP-Seq SW620 Human | SOX2 |
| MON1B    | Enrichr CHEA_2022: SOX2 20726797 ChIP-Seq SW620 Human | SOX2 |
| APOBEC3B | Enrichr CHEA_2022: SOX2 20726797 ChIP-Seq SW620 Human | SOX2 |
| ATP6V1B2 | Enrichr CHEA_2022: SOX2 20726797 ChIP-Seq SW620 Human | SOX2 |
| APOBEC3C | Enrichr CHEA_2022: SOX2 20726797 ChIP-Seq SW620 Human | SOX2 |
| LTV1     | Enrichr CHEA_2022: SOX2 20726797 ChIP-Seq SW620 Human | SOX2 |
| SLC45A4  | Enrichr CHEA_2022: SOX2 20726797 ChIP-Seq SW620 Human | SOX2 |
| WFDC2    | Enrichr CHEA_2022: SOX2 20726797 ChIP-Seq SW620 Human | SOX2 |
| MT1X     | Enrichr CHEA_2022: SOX2 20726797 ChIP-Seq SW620 Human | SOX2 |
| ICAM2    | Enrichr CHEA_2022: SOX2 20726797 ChIP-Seq SW620 Human | SOX2 |
| LGALS4   | Enrichr CHEA_2022: SOX2 20726797 ChIP-Seq SW620 Human | SOX2 |
| MT2A     | Enrichr CHEA_2022: SOX2 20726797 ChIP-Seq SW620 Human | SOX2 |

|           |                                                       |      |
|-----------|-------------------------------------------------------|------|
| CCDC92    | Enrichr CHEA_2022: SOX2 20726797 ChIP-Seq SW620 Human | SOX2 |
| LGALS1    | Enrichr CHEA_2022: SOX2 20726797 ChIP-Seq SW620 Human | SOX2 |
| REG4      | Enrichr CHEA_2022: SOX2 20726797 ChIP-Seq SW620 Human | SOX2 |
| TNFSF10   | Enrichr CHEA_2022: SOX2 20726797 ChIP-Seq SW620 Human | SOX2 |
| LGALS8    | Enrichr CHEA_2022: SOX2 20726797 ChIP-Seq SW620 Human | SOX2 |
| CCDC96    | Enrichr CHEA_2022: SOX2 20726797 ChIP-Seq SW620 Human | SOX2 |
| SPA17     | Enrichr CHEA_2022: SOX2 20726797 ChIP-Seq SW620 Human | SOX2 |
| GABBR1    | Enrichr CHEA_2022: SOX2 20726797 ChIP-Seq SW620 Human | SOX2 |
| IL15      | Enrichr CHEA_2022: SOX2 20726797 ChIP-Seq SW620 Human | SOX2 |
| SLC10A3   | Enrichr CHEA_2022: SOX2 20726797 ChIP-Seq SW620 Human | SOX2 |
| GAB2      | Enrichr CHEA_2022: SOX2 20726797 ChIP-Seq SW620 Human | SOX2 |
| GAB1      | Enrichr CHEA_2022: SOX2 20726797 ChIP-Seq SW620 Human | SOX2 |
| KLHL3     | Enrichr CHEA_2022: SOX2 20726797 ChIP-Seq SW620 Human | SOX2 |
| KLHL5     | Enrichr CHEA_2022: SOX2 20726797 ChIP-Seq SW620 Human | SOX2 |
| ZHX1      | Enrichr CHEA_2022: SOX2 20726797 ChIP-Seq SW620 Human | SOX2 |
| RAP2A     | Enrichr CHEA_2022: SOX2 20726797 ChIP-Seq SW620 Human | SOX2 |
| CTTNBP2NL | Enrichr CHEA_2022: SOX2 20726797 ChIP-Seq SW620 Human | SOX2 |
| BST2      | Enrichr CHEA_2022: SOX2 20726797 ChIP-Seq SW620 Human | SOX2 |
| DEPDC7    | Enrichr CHEA_2022: SOX2 20726797 ChIP-Seq SW620 Human | SOX2 |
| KITLG     | Enrichr CHEA_2022: SOX2 20726797 ChIP-Seq SW620 Human | SOX2 |
| ARHGEF4   | Enrichr CHEA_2022: SOX2 20726797 ChIP-Seq SW620 Human | SOX2 |
| ARHGEF3   | Enrichr CHEA_2022: SOX2 20726797 ChIP-Seq SW620 Human | SOX2 |
| FJX1      | Enrichr CHEA_2022: SOX2 20726797 ChIP-Seq SW620 Human | SOX2 |
| RANBP10   | Enrichr CHEA_2022: SOX2 20726797 ChIP-Seq SW620 Human | SOX2 |
| NRN1      | Enrichr CHEA_2022: SOX2 20726797 ChIP-Seq SW620 Human | SOX2 |
| NOXO1     | Enrichr CHEA_2022: SOX2 20726797 ChIP-Seq SW620 Human | SOX2 |
| PPCS      | Enrichr CHEA_2022: SOX2 20726797 ChIP-Seq SW620 Human | SOX2 |
| TFB1M     | Enrichr CHEA_2022: SOX2 20726797 ChIP-Seq SW620 Human | SOX2 |
| KALRN     | Enrichr CHEA_2022: SOX2 20726797 ChIP-Seq SW620 Human | SOX2 |
| PPP3CA    | Enrichr CHEA_2022: SOX2 20726797 ChIP-Seq SW620 Human | SOX2 |
| SEC14L4   | Enrichr CHEA_2022: SOX2 20726797 ChIP-Seq SW620 Human | SOX2 |
| RRAS      | Enrichr CHEA_2022: SOX2 20726797 ChIP-Seq SW620 Human | SOX2 |
| SMYD3     | Enrichr CHEA_2022: SOX2 20726797 ChIP-Seq SW620 Human | SOX2 |
| HTATIP2   | Enrichr CHEA_2022: SOX2 20726797 ChIP-Seq SW620 Human | SOX2 |
| PHGDH     | Enrichr CHEA_2022: SOX2 20726797 ChIP-Seq SW620 Human | SOX2 |
| NFIL3     | Enrichr CHEA_2022: SOX2 20726797 ChIP-Seq SW620 Human | SOX2 |
| PCK2      | Enrichr CHEA_2022: SOX2 20726797 ChIP-Seq SW620 Human | SOX2 |
| LYAR      | Enrichr CHEA_2022: SOX2 20726797 ChIP-Seq SW620 Human | SOX2 |
| CAP2      | Enrichr CHEA_2022: SOX2 20726797 ChIP-Seq SW620 Human | SOX2 |
| GAL       | Enrichr CHEA_2022: SOX2 20726797 ChIP-Seq SW620 Human | SOX2 |
| TPST2     | Enrichr CHEA_2022: SOX2 20726797 ChIP-Seq SW620 Human | SOX2 |
| TTC9      | Enrichr CHEA_2022: SOX2 20726797 ChIP-Seq SW620 Human | SOX2 |
| TTC8      | Enrichr CHEA_2022: SOX2 20726797 ChIP-Seq SW620 Human | SOX2 |
| KCNQ1     | Enrichr CHEA_2022: SOX2 20726797 ChIP-Seq SW620 Human | SOX2 |
| TPST1     | Enrichr CHEA_2022: SOX2 20726797 ChIP-Seq SW620 Human | SOX2 |
| TCEA2     | Enrichr CHEA_2022: SOX2 20726797 ChIP-Seq SW620 Human | SOX2 |
| TACC1     | Enrichr CHEA_2022: SOX2 20726797 ChIP-Seq SW620 Human | SOX2 |
| PNPLA3    | Enrichr CHEA_2022: SOX2 20726797 ChIP-Seq SW620 Human | SOX2 |
| NRP2      | Enrichr CHEA_2022: SOX2 20726797 ChIP-Seq SW620 Human | SOX2 |
| CAPG      | Enrichr CHEA_2022: SOX2 20726797 ChIP-Seq SW620 Human | SOX2 |
| NUDT4     | Enrichr CHEA_2022: SOX2 20726797 ChIP-Seq SW620 Human | SOX2 |
| SPAG16    | Enrichr CHEA_2022: SOX2 20726797 ChIP-Seq SW620 Human | SOX2 |
| HERPUD2   | Enrichr CHEA_2022: SOX2 20726797 ChIP-Seq SW620 Human | SOX2 |
| AKAP13    | Enrichr CHEA_2022: SOX2 20726797 ChIP-Seq SW620 Human | SOX2 |
| AKAP11    | Enrichr CHEA_2022: SOX2 20726797 ChIP-Seq SW620 Human | SOX2 |
| PCM1      | Enrichr CHEA_2022: SOX2 20726797 ChIP-Seq SW620 Human | SOX2 |
| AKAP12    | Enrichr CHEA_2022: SOX2 20726797 ChIP-Seq SW620 Human | SOX2 |
| FAM3C     | Enrichr CHEA_2022: SOX2 20726797 ChIP-Seq SW620 Human | SOX2 |
| FAM3B     | Enrichr CHEA_2022: SOX2 20726797 ChIP-Seq SW620 Human | SOX2 |

|          |                                                       |      |
|----------|-------------------------------------------------------|------|
| FAM3D    | Enrichr CHEA_2022: SOX2 20726797 ChIP-Seq SW620 Human | SOX2 |
| RARRES1  | Enrichr CHEA_2022: SOX2 20726797 ChIP-Seq SW620 Human | SOX2 |
| SPINK5   | Enrichr CHEA_2022: SOX2 20726797 ChIP-Seq SW620 Human | SOX2 |
| HS3ST1   | Enrichr CHEA_2022: SOX2 20726797 ChIP-Seq SW620 Human | SOX2 |
| UBE2H    | Enrichr CHEA_2022: SOX2 20726797 ChIP-Seq SW620 Human | SOX2 |
| MORC4    | Enrichr CHEA_2022: SOX2 20726797 ChIP-Seq SW620 Human | SOX2 |
| FAM3A    | Enrichr CHEA_2022: SOX2 20726797 ChIP-Seq SW620 Human | SOX2 |
| CACHD1   | Enrichr CHEA_2022: SOX2 20726797 ChIP-Seq SW620 Human | SOX2 |
| DNAJB14  | Enrichr CHEA_2022: SOX2 20726797 ChIP-Seq SW620 Human | SOX2 |
| BSPRY    | Enrichr CHEA_2022: SOX2 20726797 ChIP-Seq SW620 Human | SOX2 |
| CDKAL1   | Enrichr CHEA_2022: SOX2 20726797 ChIP-Seq SW620 Human | SOX2 |
| YPEL2    | Enrichr CHEA_2022: SOX2 20726797 ChIP-Seq SW620 Human | SOX2 |
| WDFY2    | Enrichr CHEA_2022: SOX2 20726797 ChIP-Seq SW620 Human | SOX2 |
| DEGS2    | Enrichr CHEA_2022: SOX2 20726797 ChIP-Seq SW620 Human | SOX2 |
| WDFY3    | Enrichr CHEA_2022: SOX2 20726797 ChIP-Seq SW620 Human | SOX2 |
| OTUD1    | Enrichr CHEA_2022: SOX2 20726797 ChIP-Seq SW620 Human | SOX2 |
| PPIC     | Enrichr CHEA_2022: SOX2 20726797 ChIP-Seq SW620 Human | SOX2 |
| PPID     | Enrichr CHEA_2022: SOX2 20726797 ChIP-Seq SW620 Human | SOX2 |
| GDA      | Enrichr CHEA_2022: SOX2 20726797 ChIP-Seq SW620 Human | SOX2 |
| NAPA     | Enrichr CHEA_2022: SOX2 20726797 ChIP-Seq SW620 Human | SOX2 |
| SCNN1A   | Enrichr CHEA_2022: SOX2 20726797 ChIP-Seq SW620 Human | SOX2 |
| PRDM1    | Enrichr CHEA_2022: SOX2 20726797 ChIP-Seq SW620 Human | SOX2 |
| LOXL4    | Enrichr CHEA_2022: SOX2 20726797 ChIP-Seq SW620 Human | SOX2 |
| LOXL2    | Enrichr CHEA_2022: SOX2 20726797 ChIP-Seq SW620 Human | SOX2 |
| LOXL3    | Enrichr CHEA_2022: SOX2 20726797 ChIP-Seq SW620 Human | SOX2 |
| HSD17B1  | Enrichr CHEA_2022: SOX2 20726797 ChIP-Seq SW620 Human | SOX2 |
| HSD17B2  | Enrichr CHEA_2022: SOX2 20726797 ChIP-Seq SW620 Human | SOX2 |
| MSX1     | Enrichr CHEA_2022: SOX2 20726797 ChIP-Seq SW620 Human | SOX2 |
| TBC1D16  | Enrichr CHEA_2022: SOX2 20726797 ChIP-Seq SW620 Human | SOX2 |
| TBC1D17  | Enrichr CHEA_2022: SOX2 20726797 ChIP-Seq SW620 Human | SOX2 |
| DENND2D  | Enrichr CHEA_2022: SOX2 20726797 ChIP-Seq SW620 Human | SOX2 |
| PCYT1B   | Enrichr CHEA_2022: SOX2 20726797 ChIP-Seq SW620 Human | SOX2 |
| SYT1     | Enrichr CHEA_2022: SOX2 20726797 ChIP-Seq SW620 Human | SOX2 |
| TIMM44   | Enrichr CHEA_2022: SOX2 20726797 ChIP-Seq SW620 Human | SOX2 |
| NAT1     | Enrichr CHEA_2022: SOX2 20726797 ChIP-Seq SW620 Human | SOX2 |
| CCNB1IP1 | Enrichr CHEA_2022: SOX2 20726797 ChIP-Seq SW620 Human | SOX2 |
| FGF18    | Enrichr CHEA_2022: SOX2 20726797 ChIP-Seq SW620 Human | SOX2 |
| ZNF91    | Enrichr CHEA_2022: SOX2 20726797 ChIP-Seq SW620 Human | SOX2 |
| GNB2     | Enrichr CHEA_2022: SOX2 20726797 ChIP-Seq SW620 Human | SOX2 |
| MKRN2    | Enrichr CHEA_2022: SOX2 20726797 ChIP-Seq SW620 Human | SOX2 |
| GNB5     | Enrichr CHEA_2022: SOX2 20726797 ChIP-Seq SW620 Human | SOX2 |
| GNAS     | Enrichr CHEA_2022: SOX2 20726797 ChIP-Seq SW620 Human | SOX2 |
| MUC20    | Enrichr CHEA_2022: SOX2 20726797 ChIP-Seq SW620 Human | SOX2 |
| TCF3     | Enrichr CHEA_2022: SOX2 20726797 ChIP-Seq SW620 Human | SOX2 |
| TSNARE1  | Enrichr CHEA_2022: SOX2 20726797 ChIP-Seq SW620 Human | SOX2 |
| VIL1     | Enrichr CHEA_2022: SOX2 20726797 ChIP-Seq SW620 Human | SOX2 |
| DYRK4    | Enrichr CHEA_2022: SOX2 20726797 ChIP-Seq SW620 Human | SOX2 |
| DYRK3    | Enrichr CHEA_2022: SOX2 20726797 ChIP-Seq SW620 Human | SOX2 |
| DYRK2    | Enrichr CHEA_2022: SOX2 20726797 ChIP-Seq SW620 Human | SOX2 |
| SLC41A2  | Enrichr CHEA_2022: SOX2 20726797 ChIP-Seq SW620 Human | SOX2 |
| PLAU     | Enrichr CHEA_2022: SOX2 20726797 ChIP-Seq SW620 Human | SOX2 |
| HTRA1    | Enrichr CHEA_2022: SOX2 20726797 ChIP-Seq SW620 Human | SOX2 |
| ETS1     | Enrichr CHEA_2022: SOX2 20726797 ChIP-Seq SW620 Human | SOX2 |
| ETS2     | Enrichr CHEA_2022: SOX2 20726797 ChIP-Seq SW620 Human | SOX2 |
| DAPP1    | Enrichr CHEA_2022: SOX2 20726797 ChIP-Seq SW620 Human | SOX2 |
| IGF1R    | Enrichr CHEA_2022: SOX2 20726797 ChIP-Seq SW620 Human | SOX2 |
| TGM2     | Enrichr CHEA_2022: SOX2 20726797 ChIP-Seq SW620 Human | SOX2 |
| CNN3     | Enrichr CHEA_2022: SOX2 20726797 ChIP-Seq SW620 Human | SOX2 |
| ARFGEF1  | Enrichr CHEA_2022: SOX2 20726797 ChIP-Seq SW620 Human | SOX2 |

|         |                                                       |      |
|---------|-------------------------------------------------------|------|
| GGH     | Enrichr CHEA_2022: SOX2 20726797 ChIP-Seq SW620 Human | SOX2 |
| CAV1    | Enrichr CHEA_2022: SOX2 20726797 ChIP-Seq SW620 Human | SOX2 |
| NAV1    | Enrichr CHEA_2022: SOX2 20726797 ChIP-Seq SW620 Human | SOX2 |
| ETV1    | Enrichr CHEA_2022: SOX2 20726797 ChIP-Seq SW620 Human | SOX2 |
| NAV2    | Enrichr CHEA_2022: SOX2 20726797 ChIP-Seq SW620 Human | SOX2 |
| ETV5    | Enrichr CHEA_2022: SOX2 20726797 ChIP-Seq SW620 Human | SOX2 |
| TTC17   | Enrichr CHEA_2022: SOX2 20726797 ChIP-Seq SW620 Human | SOX2 |
| ETV6    | Enrichr CHEA_2022: SOX2 20726797 ChIP-Seq SW620 Human | SOX2 |
| TAPBP   | Enrichr CHEA_2022: SOX2 20726797 ChIP-Seq SW620 Human | SOX2 |
| EPN3    | Enrichr CHEA_2022: SOX2 20726797 ChIP-Seq SW620 Human | SOX2 |
| ELF2    | Enrichr CHEA_2022: SOX2 20726797 ChIP-Seq SW620 Human | SOX2 |
| ELF3    | Enrichr CHEA_2022: SOX2 20726797 ChIP-Seq SW620 Human | SOX2 |
| MANSC1  | Enrichr CHEA_2022: SOX2 20726797 ChIP-Seq SW620 Human | SOX2 |
| CUEDC1  | Enrichr CHEA_2022: SOX2 20726797 ChIP-Seq SW620 Human | SOX2 |
| FBP1    | Enrichr CHEA_2022: SOX2 20726797 ChIP-Seq SW620 Human | SOX2 |
| SHANK2  | Enrichr CHEA_2022: SOX2 20726797 ChIP-Seq SW620 Human | SOX2 |
| TTC26   | Enrichr CHEA_2022: SOX2 20726797 ChIP-Seq SW620 Human | SOX2 |
| NNMT    | Enrichr CHEA_2022: SOX2 20726797 ChIP-Seq SW620 Human | SOX2 |
| TNFAIP8 | Enrichr CHEA_2022: SOX2 20726797 ChIP-Seq SW620 Human | SOX2 |
| TNFAIP2 | Enrichr CHEA_2022: SOX2 20726797 ChIP-Seq SW620 Human | SOX2 |
| PITPNC1 | Enrichr CHEA_2022: SOX2 20726797 ChIP-Seq SW620 Human | SOX2 |
| AGPAT5  | Enrichr CHEA_2022: SOX2 20726797 ChIP-Seq SW620 Human | SOX2 |
| CA2     | Enrichr CHEA_2022: SOX2 20726797 ChIP-Seq SW620 Human | SOX2 |
| IRAK1   | Enrichr CHEA_2022: SOX2 20726797 ChIP-Seq SW620 Human | SOX2 |
| LPXN    | Enrichr CHEA_2022: SOX2 20726797 ChIP-Seq SW620 Human | SOX2 |
| ATF7IP  | Enrichr CHEA_2022: SOX2 20726797 ChIP-Seq SW620 Human | SOX2 |
| DAPK1   | Enrichr CHEA_2022: SOX2 20726797 ChIP-Seq SW620 Human | SOX2 |
| ERCC1   | Enrichr CHEA_2022: SOX2 20726797 ChIP-Seq SW620 Human | SOX2 |
| GALE    | Enrichr CHEA_2022: SOX2 20726797 ChIP-Seq SW620 Human | SOX2 |
| KRAS    | Enrichr CHEA_2022: SOX2 20726797 ChIP-Seq SW620 Human | SOX2 |
| TRIB2   | Enrichr CHEA_2022: SOX2 20726797 ChIP-Seq SW620 Human | SOX2 |
| TRIB3   | Enrichr CHEA_2022: SOX2 20726797 ChIP-Seq SW620 Human | SOX2 |
| SIGIRR  | Enrichr CHEA_2022: SOX2 20726797 ChIP-Seq SW620 Human | SOX2 |
| TRIB1   | Enrichr CHEA_2022: SOX2 20726797 ChIP-Seq SW620 Human | SOX2 |
| RND3    | Enrichr CHEA_2022: SOX2 20726797 ChIP-Seq SW620 Human | SOX2 |
| NR3C1   | Enrichr CHEA_2022: SOX2 20726797 ChIP-Seq SW620 Human | SOX2 |
| POLD4   | Enrichr CHEA_2022: SOX2 20726797 ChIP-Seq SW620 Human | SOX2 |
| ACOXL   | Enrichr CHEA_2022: SOX2 20726797 ChIP-Seq SW620 Human | SOX2 |
| OXCT1   | Enrichr CHEA_2022: SOX2 20726797 ChIP-Seq SW620 Human | SOX2 |
| DIP2C   | Enrichr CHEA_2022: SOX2 20726797 ChIP-Seq SW620 Human | SOX2 |
| HOMER3  | Enrichr CHEA_2022: SOX2 20726797 ChIP-Seq SW620 Human | SOX2 |
| PCGF6   | Enrichr CHEA_2022: SOX2 20726797 ChIP-Seq SW620 Human | SOX2 |
| HUS1    | Enrichr CHEA_2022: SOX2 20726797 ChIP-Seq SW620 Human | SOX2 |
| NUP93   | Enrichr CHEA_2022: SOX2 20726797 ChIP-Seq SW620 Human | SOX2 |
| CAPN12  | Enrichr CHEA_2022: SOX2 20726797 ChIP-Seq SW620 Human | SOX2 |
| DEPDC1B | Enrichr CHEA_2022: SOX2 20726797 ChIP-Seq SW620 Human | SOX2 |
| TEF     | Enrichr CHEA_2022: SOX2 20726797 ChIP-Seq SW620 Human | SOX2 |
| RALB    | Enrichr CHEA_2022: SOX2 20726797 ChIP-Seq SW620 Human | SOX2 |
| ZNF395  | Enrichr CHEA_2022: SOX2 20726797 ChIP-Seq SW620 Human | SOX2 |
| ADARB1  | Enrichr CHEA_2022: SOX2 20726797 ChIP-Seq SW620 Human | SOX2 |
| GLS     | Enrichr CHEA_2022: SOX2 20726797 ChIP-Seq SW620 Human | SOX2 |
| ASCL2   | Enrichr CHEA_2022: SOX2 20726797 ChIP-Seq SW620 Human | SOX2 |
| ADCY7   | Enrichr CHEA_2022: SOX2 20726797 ChIP-Seq SW620 Human | SOX2 |
| GNG2    | Enrichr CHEA_2022: SOX2 20726797 ChIP-Seq SW620 Human | SOX2 |
| APOL6   | Enrichr CHEA_2022: SOX2 20726797 ChIP-Seq SW620 Human | SOX2 |
| GNG4    | Enrichr CHEA_2022: SOX2 20726797 ChIP-Seq SW620 Human | SOX2 |
| FLRT3   | Enrichr CHEA_2022: SOX2 20726797 ChIP-Seq SW620 Human | SOX2 |
| WDR72   | Enrichr CHEA_2022: SOX2 20726797 ChIP-Seq SW620 Human | SOX2 |
| ALOX5   | Enrichr CHEA_2022: SOX2 20726797 ChIP-Seq SW620 Human | SOX2 |

|          |                                                       |      |
|----------|-------------------------------------------------------|------|
| ST3GAL5  | Enrichr CHEA_2022: SOX2 20726797 ChIP-Seq SW620 Human | SOX2 |
| PRSS8    | Enrichr CHEA_2022: SOX2 20726797 ChIP-Seq SW620 Human | SOX2 |
| LUC7L    | Enrichr CHEA_2022: SOX2 20726797 ChIP-Seq SW620 Human | SOX2 |
| NUP88    | Enrichr CHEA_2022: SOX2 20726797 ChIP-Seq SW620 Human | SOX2 |
| ST3GAL1  | Enrichr CHEA_2022: SOX2 20726797 ChIP-Seq SW620 Human | SOX2 |
| PRSS3    | Enrichr CHEA_2022: SOX2 20726797 ChIP-Seq SW620 Human | SOX2 |
| APOL1    | Enrichr CHEA_2022: SOX2 20726797 ChIP-Seq SW620 Human | SOX2 |
| FDFT1    | Enrichr CHEA_2022: SOX2 20726797 ChIP-Seq SW620 Human | SOX2 |
| ST3GAL4  | Enrichr CHEA_2022: SOX2 20726797 ChIP-Seq SW620 Human | SOX2 |
| TAF9B    | Enrichr CHEA_2022: SOX2 20726797 ChIP-Seq SW620 Human | SOX2 |
| PRKCH    | Enrichr CHEA_2022: SOX2 20726797 ChIP-Seq SW620 Human | SOX2 |
| NDFIP1   | Enrichr CHEA_2022: SOX2 20726797 ChIP-Seq SW620 Human | SOX2 |
| PHC3     | Enrichr CHEA_2022: SOX2 20726797 ChIP-Seq SW620 Human | SOX2 |
| ICMT     | Enrichr CHEA_2022: SOX2 20726797 ChIP-Seq SW620 Human | SOX2 |
| WDR59    | Enrichr CHEA_2022: SOX2 20726797 ChIP-Seq SW620 Human | SOX2 |
| STARD13  | Enrichr CHEA_2022: SOX2 20726797 ChIP-Seq SW620 Human | SOX2 |
| STARD10  | Enrichr CHEA_2022: SOX2 20726797 ChIP-Seq SW620 Human | SOX2 |
| PLK2     | Enrichr CHEA_2022: SOX2 20726797 ChIP-Seq SW620 Human | SOX2 |
| PRKCE    | Enrichr CHEA_2022: SOX2 20726797 ChIP-Seq SW620 Human | SOX2 |
| PARD3    | Enrichr CHEA_2022: SOX2 20726797 ChIP-Seq SW620 Human | SOX2 |
| PRKCA    | Enrichr CHEA_2022: SOX2 20726797 ChIP-Seq SW620 Human | SOX2 |
| TERF2    | Enrichr CHEA_2022: SOX2 20726797 ChIP-Seq SW620 Human | SOX2 |
| ELL2     | Enrichr CHEA_2022: SOX2 20726797 ChIP-Seq SW620 Human | SOX2 |
| ELL3     | Enrichr CHEA_2022: SOX2 20726797 ChIP-Seq SW620 Human | SOX2 |
| COQ10A   | Enrichr CHEA_2022: SOX2 20726797 ChIP-Seq SW620 Human | SOX2 |
| EHD2     | Enrichr CHEA_2022: SOX2 20726797 ChIP-Seq SW620 Human | SOX2 |
| SQLE     | Enrichr CHEA_2022: SOX2 20726797 ChIP-Seq SW620 Human | SOX2 |
| GJB3     | Enrichr CHEA_2022: SOX2 20726797 ChIP-Seq SW620 Human | SOX2 |
| GJB2     | Enrichr CHEA_2022: SOX2 20726797 ChIP-Seq SW620 Human | SOX2 |
| TCN1     | Enrichr CHEA_2022: SOX2 20726797 ChIP-Seq SW620 Human | SOX2 |
| SNAI2    | Enrichr CHEA_2022: SOX2 20726797 ChIP-Seq SW620 Human | SOX2 |
| PRKD2    | Enrichr CHEA_2022: SOX2 20726797 ChIP-Seq SW620 Human | SOX2 |
| GNE      | Enrichr CHEA_2022: SOX2 20726797 ChIP-Seq SW620 Human | SOX2 |
| CFB      | Enrichr CHEA_2022: SOX2 20726797 ChIP-Seq SW620 Human | SOX2 |
| FANK1    | Enrichr CHEA_2022: SOX2 20726797 ChIP-Seq SW620 Human | SOX2 |
| CFH      | Enrichr CHEA_2022: SOX2 20726797 ChIP-Seq SW620 Human | SOX2 |
| PHYHIPL  | Enrichr CHEA_2022: SOX2 20726797 ChIP-Seq SW620 Human | SOX2 |
| GNS      | Enrichr CHEA_2022: SOX2 20726797 ChIP-Seq SW620 Human | SOX2 |
| ELK3     | Enrichr CHEA_2022: SOX2 20726797 ChIP-Seq SW620 Human | SOX2 |
| PLAC8    | Enrichr CHEA_2022: SOX2 20726797 ChIP-Seq SW620 Human | SOX2 |
| NUP62    | Enrichr CHEA_2022: SOX2 20726797 ChIP-Seq SW620 Human | SOX2 |
| AP1S3    | Enrichr CHEA_2022: SOX2 20726797 ChIP-Seq SW620 Human | SOX2 |
| CEP72    | Enrichr CHEA_2022: SOX2 20726797 ChIP-Seq SW620 Human | SOX2 |
| AP1S2    | Enrichr CHEA_2022: SOX2 20726797 ChIP-Seq SW620 Human | SOX2 |
| PROM2    | Enrichr CHEA_2022: SOX2 20726797 ChIP-Seq SW620 Human | SOX2 |
| PROM1    | Enrichr CHEA_2022: SOX2 20726797 ChIP-Seq SW620 Human | SOX2 |
| ZNF367   | Enrichr CHEA_2022: SOX2 20726797 ChIP-Seq SW620 Human | SOX2 |
| SHPRH    | Enrichr CHEA_2022: SOX2 20726797 ChIP-Seq SW620 Human | SOX2 |
| PHF10    | Enrichr CHEA_2022: SOX2 20726797 ChIP-Seq SW620 Human | SOX2 |
| PHF13    | Enrichr CHEA_2022: SOX2 20726797 ChIP-Seq SW620 Human | SOX2 |
| GRTP1    | Enrichr CHEA_2022: SOX2 20726797 ChIP-Seq SW620 Human | SOX2 |
| CGN      | Enrichr CHEA_2022: SOX2 20726797 ChIP-Seq SW620 Human | SOX2 |
| TCP1     | Enrichr CHEA_2022: SOX2 20726797 ChIP-Seq SW620 Human | SOX2 |
| NFATC3   | Enrichr CHEA_2022: SOX2 20726797 ChIP-Seq SW620 Human | SOX2 |
| ASH1L    | Enrichr CHEA_2022: SOX2 20726797 ChIP-Seq SW620 Human | SOX2 |
| WDR35    | Enrichr CHEA_2022: SOX2 20726797 ChIP-Seq SW620 Human | SOX2 |
| TUBB2B   | Enrichr CHEA_2022: SOX2 20726797 ChIP-Seq SW620 Human | SOX2 |
| HLA-DQB1 | Enrichr CHEA_2022: SOX2 20726797 ChIP-Seq SW620 Human | SOX2 |
| PHF14    | Enrichr CHEA_2022: SOX2 20726797 ChIP-Seq SW620 Human | SOX2 |



|         |                                                       |      |
|---------|-------------------------------------------------------|------|
| RARA    | Enrichr CHEA_2022: SOX2 20726797 ChIP-Seq SW620 Human | SOX2 |
| MGLL    | Enrichr CHEA_2022: SOX2 20726797 ChIP-Seq SW620 Human | SOX2 |
| GAS6    | Enrichr CHEA_2022: SOX2 20726797 ChIP-Seq SW620 Human | SOX2 |
| BTG3    | Enrichr CHEA_2022: SOX2 20726797 ChIP-Seq SW620 Human | SOX2 |
| BTG2    | Enrichr CHEA_2022: SOX2 20726797 ChIP-Seq SW620 Human | SOX2 |
| BTG1    | Enrichr CHEA_2022: SOX2 20726797 ChIP-Seq SW620 Human | SOX2 |
| PRDM11  | Enrichr CHEA_2022: SOX2 20726797 ChIP-Seq SW620 Human | SOX2 |
| TIMP4   | Enrichr CHEA_2022: SOX2 20726797 ChIP-Seq SW620 Human | SOX2 |
| PBK     | Enrichr CHEA_2022: SOX2 20726797 ChIP-Seq SW620 Human | SOX2 |
| PLL1    | Enrichr CHEA_2022: SOX2 20726797 ChIP-Seq SW620 Human | SOX2 |
| TIMP2   | Enrichr CHEA_2022: SOX2 20726797 ChIP-Seq SW620 Human | SOX2 |
| TEAD2   | Enrichr CHEA_2022: SOX2 20726797 ChIP-Seq SW620 Human | SOX2 |
| TEAD3   | Enrichr CHEA_2022: SOX2 20726797 ChIP-Seq SW620 Human | SOX2 |
| AP1M2   | Enrichr CHEA_2022: SOX2 20726797 ChIP-Seq SW620 Human | SOX2 |
| TEAD4   | Enrichr CHEA_2022: SOX2 20726797 ChIP-Seq SW620 Human | SOX2 |
| CEP57   | Enrichr CHEA_2022: SOX2 20726797 ChIP-Seq SW620 Human | SOX2 |
| FARP2   | Enrichr CHEA_2022: SOX2 20726797 ChIP-Seq SW620 Human | SOX2 |
| CDKN2C  | Enrichr CHEA_2022: SOX2 20726797 ChIP-Seq SW620 Human | SOX2 |
| MBNL2   | Enrichr CHEA_2022: SOX2 20726797 ChIP-Seq SW620 Human | SOX2 |
| YTHDF3  | Enrichr CHEA_2022: SOX2 20726797 ChIP-Seq SW620 Human | SOX2 |
| MGMT    | Enrichr CHEA_2022: SOX2 20726797 ChIP-Seq SW620 Human | SOX2 |
| CDKN2B  | Enrichr CHEA_2022: SOX2 20726797 ChIP-Seq SW620 Human | SOX2 |
| G0S2    | Enrichr CHEA_2022: SOX2 20726797 ChIP-Seq SW620 Human | SOX2 |
| NR1H3   | Enrichr CHEA_2022: SOX2 20726797 ChIP-Seq SW620 Human | SOX2 |
| ELP3    | Enrichr CHEA_2022: SOX2 20726797 ChIP-Seq SW620 Human | SOX2 |
| NFIA    | Enrichr CHEA_2022: SOX2 20726797 ChIP-Seq SW620 Human | SOX2 |
| DHRS2   | Enrichr CHEA_2022: SOX2 20726797 ChIP-Seq SW620 Human | SOX2 |
| DHRS3   | Enrichr CHEA_2022: SOX2 20726797 ChIP-Seq SW620 Human | SOX2 |
| FARP1   | Enrichr CHEA_2022: SOX2 20726797 ChIP-Seq SW620 Human | SOX2 |
| ZNF33B  | Enrichr CHEA_2022: SOX2 20726797 ChIP-Seq SW620 Human | SOX2 |
| DHRS9   | Enrichr CHEA_2022: SOX2 20726797 ChIP-Seq SW620 Human | SOX2 |
| NFIB    | Enrichr CHEA_2022: SOX2 20726797 ChIP-Seq SW620 Human | SOX2 |
| PLEKHO1 | Enrichr CHEA_2022: SOX2 20726797 ChIP-Seq SW620 Human | SOX2 |
| SMOC2   | Enrichr CHEA_2022: SOX2 20726797 ChIP-Seq SW620 Human | SOX2 |
| MAP1B   | Enrichr CHEA_2022: SOX2 20726797 ChIP-Seq SW620 Human | SOX2 |
| NUCB2   | Enrichr CHEA_2022: SOX2 20726797 ChIP-Seq SW620 Human | SOX2 |
| ZNF331  | Enrichr CHEA_2022: SOX2 20726797 ChIP-Seq SW620 Human | SOX2 |
| PHF6    | Enrichr CHEA_2022: SOX2 20726797 ChIP-Seq SW620 Human | SOX2 |
| CDKN1C  | Enrichr CHEA_2022: SOX2 20726797 ChIP-Seq SW620 Human | SOX2 |
| GRN     | Enrichr CHEA_2022: SOX2 20726797 ChIP-Seq SW620 Human | SOX2 |
| PYGB    | Enrichr CHEA_2022: SOX2 20726797 ChIP-Seq SW620 Human | SOX2 |
| SETD7   | Enrichr CHEA_2022: SOX2 20726797 ChIP-Seq SW620 Human | SOX2 |
| PYGL    | Enrichr CHEA_2022: SOX2 20726797 ChIP-Seq SW620 Human | SOX2 |
| STON2   | Enrichr CHEA_2022: SOX2 20726797 ChIP-Seq SW620 Human | SOX2 |
| PDF     | Enrichr CHEA_2022: SOX2 20726797 ChIP-Seq SW620 Human | SOX2 |
| PPP1R2  | Enrichr CHEA_2022: SOX2 20726797 ChIP-Seq SW620 Human | SOX2 |
| UBL3    | Enrichr CHEA_2022: SOX2 20726797 ChIP-Seq SW620 Human | SOX2 |
| ASH2L   | Enrichr CHEA_2022: SOX2 20726797 ChIP-Seq SW620 Human | SOX2 |
| CKB     | Enrichr CHEA_2022: SOX2 20726797 ChIP-Seq SW620 Human | SOX2 |
| SLC17A5 | Enrichr CHEA_2022: SOX2 20726797 ChIP-Seq SW620 Human | SOX2 |
| GSN     | Enrichr CHEA_2022: SOX2 20726797 ChIP-Seq SW620 Human | SOX2 |
| TLE4    | Enrichr CHEA_2022: SOX2 20726797 ChIP-Seq SW620 Human | SOX2 |
| TLE1    | Enrichr CHEA_2022: SOX2 20726797 ChIP-Seq SW620 Human | SOX2 |
| TPM2    | Enrichr CHEA_2022: SOX2 20726797 ChIP-Seq SW620 Human | SOX2 |
| VRK2    | Enrichr CHEA_2022: SOX2 20726797 ChIP-Seq SW620 Human | SOX2 |
| VRK3    | Enrichr CHEA_2022: SOX2 20726797 ChIP-Seq SW620 Human | SOX2 |
| HIPK2   | Enrichr CHEA_2022: SOX2 20726797 ChIP-Seq SW620 Human | SOX2 |
| RAB30   | Enrichr CHEA_2022: SOX2 20726797 ChIP-Seq SW620 Human | SOX2 |
| NRBP2   | Enrichr CHEA_2022: SOX2 20726797 ChIP-Seq SW620 Human | SOX2 |

|          |                                                       |      |
|----------|-------------------------------------------------------|------|
| FAM91A1  | Enrichr CHEA_2022: SOX2 20726797 ChIP-Seq SW620 Human | SOX2 |
| SLC7A6OS | Enrichr CHEA_2022: SOX2 20726797 ChIP-Seq SW620 Human | SOX2 |
| RAB31    | Enrichr CHEA_2022: SOX2 20726797 ChIP-Seq SW620 Human | SOX2 |
| PSAT1    | Enrichr CHEA_2022: SOX2 20726797 ChIP-Seq SW620 Human | SOX2 |
| PLXNB2   | Enrichr CHEA_2022: SOX2 20726797 ChIP-Seq SW620 Human | SOX2 |
| CSPG5    | Enrichr CHEA_2022: SOX2 20726797 ChIP-Seq SW620 Human | SOX2 |
| CNIH3    | Enrichr CHEA_2022: SOX2 20726797 ChIP-Seq SW620 Human | SOX2 |
| TCTA     | Enrichr CHEA_2022: SOX2 20726797 ChIP-Seq SW620 Human | SOX2 |
| PPIL4    | Enrichr CHEA_2022: SOX2 20726797 ChIP-Seq SW620 Human | SOX2 |
| FKBP7    | Enrichr CHEA_2022: SOX2 20726797 ChIP-Seq SW620 Human | SOX2 |
| GOLGA8A  | Enrichr CHEA_2022: SOX2 20726797 ChIP-Seq SW620 Human | SOX2 |
| GTF2I    | Enrichr CHEA_2022: SOX2 20726797 ChIP-Seq SW620 Human | SOX2 |
| RNMT     | Enrichr CHEA_2022: SOX2 20726797 ChIP-Seq SW620 Human | SOX2 |
| PROS1    | Enrichr CHEA_2022: SOX2 20726797 ChIP-Seq SW620 Human | SOX2 |
| TCEAL1   | Enrichr CHEA_2022: SOX2 20726797 ChIP-Seq SW620 Human | SOX2 |
| PAPSS1   | Enrichr CHEA_2022: SOX2 20726797 ChIP-Seq SW620 Human | SOX2 |
| PAPSS2   | Enrichr CHEA_2022: SOX2 20726797 ChIP-Seq SW620 Human | SOX2 |
| FGD5     | Enrichr CHEA_2022: SOX2 20726797 ChIP-Seq SW620 Human | SOX2 |
| TCEAL8   | Enrichr CHEA_2022: SOX2 20726797 ChIP-Seq SW620 Human | SOX2 |
| ABLIM1   | Enrichr CHEA_2022: SOX2 20726797 ChIP-Seq SW620 Human | SOX2 |
| ABLIM3   | Enrichr CHEA_2022: SOX2 20726797 ChIP-Seq SW620 Human | SOX2 |
| CLCC1    | Enrichr CHEA_2022: SOX2 20726797 ChIP-Seq SW620 Human | SOX2 |
| TCEAL4   | Enrichr CHEA_2022: SOX2 20726797 ChIP-Seq SW620 Human | SOX2 |
| RAB25    | Enrichr CHEA_2022: SOX2 20726797 ChIP-Seq SW620 Human | SOX2 |
| SLC39A6  | Enrichr CHEA_2022: SOX2 20726797 ChIP-Seq SW620 Human | SOX2 |
| TXNL4B   | Enrichr CHEA_2022: SOX2 20726797 ChIP-Seq SW620 Human | SOX2 |
| ZNF302   | Enrichr CHEA_2022: SOX2 20726797 ChIP-Seq SW620 Human | SOX2 |
| SIAE     | Enrichr CHEA_2022: SOX2 20726797 ChIP-Seq SW620 Human | SOX2 |
| KCMF1    | Enrichr CHEA_2022: SOX2 20726797 ChIP-Seq SW620 Human | SOX2 |
| SERF1A   | Enrichr CHEA_2022: SOX2 20726797 ChIP-Seq SW620 Human | SOX2 |
| TRAPPC2  | Enrichr CHEA_2022: SOX2 20726797 ChIP-Seq SW620 Human | SOX2 |
| OSBPL5   | Enrichr CHEA_2022: SOX2 20726797 ChIP-Seq SW620 Human | SOX2 |
| FRMD4B   | Enrichr CHEA_2022: SOX2 20726797 ChIP-Seq SW620 Human | SOX2 |
| TFDP1    | Enrichr CHEA_2022: SOX2 20726797 ChIP-Seq SW620 Human | SOX2 |
| FRMD4A   | Enrichr CHEA_2022: SOX2 20726797 ChIP-Seq SW620 Human | SOX2 |
| TPP2     | Enrichr CHEA_2022: SOX2 20726797 ChIP-Seq SW620 Human | SOX2 |
| LHX6     | Enrichr CHEA_2022: SOX2 20726797 ChIP-Seq SW620 Human | SOX2 |
| RAB3D    | Enrichr CHEA_2022: SOX2 20726797 ChIP-Seq SW620 Human | SOX2 |
| SLC26A2  | Enrichr CHEA_2022: SOX2 20726797 ChIP-Seq SW620 Human | SOX2 |
| CBFB     | Enrichr CHEA_2022: SOX2 20726797 ChIP-Seq SW620 Human | SOX2 |
| NPEPPS   | Enrichr CHEA_2022: SOX2 20726797 ChIP-Seq SW620 Human | SOX2 |
| CDC14B   | Enrichr CHEA_2022: SOX2 20726797 ChIP-Seq SW620 Human | SOX2 |
| TM7SF2   | Enrichr CHEA_2022: SOX2 20726797 ChIP-Seq SW620 Human | SOX2 |
| TM7SF3   | Enrichr CHEA_2022: SOX2 20726797 ChIP-Seq SW620 Human | SOX2 |
| PLXNA3   | Enrichr CHEA_2022: SOX2 20726797 ChIP-Seq SW620 Human | SOX2 |
| PI3      | Enrichr CHEA_2022: SOX2 20726797 ChIP-Seq SW620 Human | SOX2 |
| PLXNA2   | Enrichr CHEA_2022: SOX2 20726797 ChIP-Seq SW620 Human | SOX2 |
| PAPOLA   | Enrichr CHEA_2022: SOX2 20726797 ChIP-Seq SW620 Human | SOX2 |
| PLXNA1   | Enrichr CHEA_2022: SOX2 20726797 ChIP-Seq SW620 Human | SOX2 |
| PLS3     | Enrichr CHEA_2022: SOX2 20726797 ChIP-Seq SW620 Human | SOX2 |
| MAP2K6   | Enrichr CHEA_2022: SOX2 20726797 ChIP-Seq SW620 Human | SOX2 |
| CDADC1   | Enrichr CHEA_2022: SOX2 20726797 ChIP-Seq SW620 Human | SOX2 |
| RFC4     | Enrichr CHEA_2022: SOX2 20726797 ChIP-Seq SW620 Human | SOX2 |
| XCL1     | Enrichr CHEA_2022: SOX2 20726797 ChIP-Seq SW620 Human | SOX2 |
| KBTD11   | Enrichr CHEA_2022: SOX2 20726797 ChIP-Seq SW620 Human | SOX2 |
| IRAK1BP1 | Enrichr CHEA_2022: SOX2 20726797 ChIP-Seq SW620 Human | SOX2 |
| DAB2     | Enrichr CHEA_2022: SOX2 20726797 ChIP-Seq SW620 Human | SOX2 |
| MFAP2    | Enrichr CHEA_2022: SOX2 20726797 ChIP-Seq SW620 Human | SOX2 |
| ESPL1    | Enrichr CHEA_2022: SOX2 20726797 ChIP-Seq SW620 Human | SOX2 |

|          |                                                       |      |
|----------|-------------------------------------------------------|------|
| BCL6     | Enrichr CHEA_2022: SOX2 20726797 ChIP-Seq SW620 Human | SOX2 |
| DNAJC6   | Enrichr CHEA_2022: SOX2 20726797 ChIP-Seq SW620 Human | SOX2 |
| DNAJC5   | Enrichr CHEA_2022: SOX2 20726797 ChIP-Seq SW620 Human | SOX2 |
| PIR      | Enrichr CHEA_2022: SOX2 20726797 ChIP-Seq SW620 Human | SOX2 |
| XCL2     | Enrichr CHEA_2022: SOX2 20726797 ChIP-Seq SW620 Human | SOX2 |
| LAT      | Enrichr CHEA_2022: SOX2 20726797 ChIP-Seq SW620 Human | SOX2 |
| BMPR2    | Enrichr CHEA_2022: SOX2 20726797 ChIP-Seq SW620 Human | SOX2 |
| CCDC25   | Enrichr CHEA_2022: SOX2 20726797 ChIP-Seq SW620 Human | SOX2 |
| HMMR     | Enrichr CHEA_2022: SOX2 20726797 ChIP-Seq SW620 Human | SOX2 |
| ZC3H8    | Enrichr CHEA_2022: SOX2 20726797 ChIP-Seq SW620 Human | SOX2 |
| UBR1     | Enrichr CHEA_2022: SOX2 20726797 ChIP-Seq SW620 Human | SOX2 |
| CYP3A5   | Enrichr CHEA_2022: SOX2 20726797 ChIP-Seq SW620 Human | SOX2 |
| CYP3A7   | Enrichr CHEA_2022: SOX2 20726797 ChIP-Seq SW620 Human | SOX2 |
| LBH      | Enrichr CHEA_2022: SOX2 20726797 ChIP-Seq SW620 Human | SOX2 |
| PSTPIP2  | Enrichr CHEA_2022: SOX2 20726797 ChIP-Seq SW620 Human | SOX2 |
| P2RY2    | Enrichr CHEA_2022: SOX2 20726797 ChIP-Seq SW620 Human | SOX2 |
| DVL2     | Enrichr CHEA_2022: SOX2 20726797 ChIP-Seq SW620 Human | SOX2 |
| PHACTR3  | Enrichr CHEA_2022: SOX2 20726797 ChIP-Seq SW620 Human | SOX2 |
| PHACTR2  | Enrichr CHEA_2022: SOX2 20726797 ChIP-Seq SW620 Human | SOX2 |
| DNAJB9   | Enrichr CHEA_2022: SOX2 20726797 ChIP-Seq SW620 Human | SOX2 |
| SERAC1   | Enrichr CHEA_2022: SOX2 20726797 ChIP-Seq SW620 Human | SOX2 |
| EMILIN2  | Enrichr CHEA_2022: SOX2 20726797 ChIP-Seq SW620 Human | SOX2 |
| CCDC34   | Enrichr CHEA_2022: SOX2 20726797 ChIP-Seq SW620 Human | SOX2 |
| TPPP     | Enrichr CHEA_2022: SOX2 20726797 ChIP-Seq SW620 Human | SOX2 |
| CEP170   | Enrichr CHEA_2022: SOX2 20726797 ChIP-Seq SW620 Human | SOX2 |
| ADSL     | Enrichr CHEA_2022: SOX2 20726797 ChIP-Seq SW620 Human | SOX2 |
| PLEKHG6  | Enrichr CHEA_2022: SOX2 20726797 ChIP-Seq SW620 Human | SOX2 |
| KRR1     | Enrichr CHEA_2022: SOX2 20726797 ChIP-Seq SW620 Human | SOX2 |
| COBL     | Enrichr CHEA_2022: SOX2 20726797 ChIP-Seq SW620 Human | SOX2 |
| FBXL16   | Enrichr CHEA_2022: SOX2 20726797 ChIP-Seq SW620 Human | SOX2 |
| LEMD1    | Enrichr CHEA_2022: SOX2 20726797 ChIP-Seq SW620 Human | SOX2 |
| LCK      | Enrichr CHEA_2022: SOX2 20726797 ChIP-Seq SW620 Human | SOX2 |
| P2RX5    | Enrichr CHEA_2022: SOX2 20726797 ChIP-Seq SW620 Human | SOX2 |
| RAB15    | Enrichr CHEA_2022: SOX2 20726797 ChIP-Seq SW620 Human | SOX2 |
| APOC1    | Enrichr CHEA_2022: SOX2 20726797 ChIP-Seq SW620 Human | SOX2 |
| KIAA0586 | Enrichr CHEA_2022: SOX2 20726797 ChIP-Seq SW620 Human | SOX2 |
| DNAJA4   | Enrichr CHEA_2022: SOX2 20726797 ChIP-Seq SW620 Human | SOX2 |
| POLR1D   | Enrichr CHEA_2022: SOX2 20726797 ChIP-Seq SW620 Human | SOX2 |
| APOC2    | Enrichr CHEA_2022: SOX2 20726797 ChIP-Seq SW620 Human | SOX2 |
| POLR1E   | Enrichr CHEA_2022: SOX2 20726797 ChIP-Seq SW620 Human | SOX2 |
| CCDC66   | Enrichr CHEA_2022: SOX2 20726797 ChIP-Seq SW620 Human | SOX2 |
| PLEKHG1  | Enrichr CHEA_2022: SOX2 20726797 ChIP-Seq SW620 Human | SOX2 |
| HDAC4    | Enrichr CHEA_2022: SOX2 20726797 ChIP-Seq SW620 Human | SOX2 |
| CEBPD    | Enrichr CHEA_2022: SOX2 20726797 ChIP-Seq SW620 Human | SOX2 |
| MCM8     | Enrichr CHEA_2022: SOX2 20726797 ChIP-Seq SW620 Human | SOX2 |
| WDR4     | Enrichr CHEA_2022: SOX2 20726797 ChIP-Seq SW620 Human | SOX2 |
| TTL      | Enrichr CHEA_2022: SOX2 20726797 ChIP-Seq SW620 Human | SOX2 |
| THSD1    | Enrichr CHEA_2022: SOX2 20726797 ChIP-Seq SW620 Human | SOX2 |
| NOB1     | Enrichr CHEA_2022: SOX2 20726797 ChIP-Seq SW620 Human | SOX2 |
| TTK      | Enrichr CHEA_2022: SOX2 20726797 ChIP-Seq SW620 Human | SOX2 |
| HDAC9    | Enrichr CHEA_2022: SOX2 20726797 ChIP-Seq SW620 Human | SOX2 |
| SYNE2    | Enrichr CHEA_2022: SOX2 20726797 ChIP-Seq SW620 Human | SOX2 |
| THSD4    | Enrichr CHEA_2022: SOX2 20726797 ChIP-Seq SW620 Human | SOX2 |
| SCRN2    | Enrichr CHEA_2022: SOX2 20726797 ChIP-Seq SW620 Human | SOX2 |
| SCRN3    | Enrichr CHEA_2022: SOX2 20726797 ChIP-Seq SW620 Human | SOX2 |
| UGT1A6   | Enrichr CHEA_2022: SOX2 20726797 ChIP-Seq SW620 Human | SOX2 |
| CCDC51   | Enrichr CHEA_2022: SOX2 20726797 ChIP-Seq SW620 Human | SOX2 |
| UGT1A8   | Enrichr CHEA_2022: SOX2 20726797 ChIP-Seq SW620 Human | SOX2 |
| IFRD1    | Enrichr CHEA_2022: SOX2 20726797 ChIP-Seq SW620 Human | SOX2 |

|         |                                                       |      |
|---------|-------------------------------------------------------|------|
| IL1R2   | Enrichr CHEA_2022: SOX2 20726797 ChIP-Seq SW620 Human | SOX2 |
| KRT7    | Enrichr CHEA_2022: SOX2 20726797 ChIP-Seq SW620 Human | SOX2 |
| CRNKL1  | Enrichr CHEA_2022: SOX2 20726797 ChIP-Seq SW620 Human | SOX2 |
| IL23A   | Enrichr CHEA_2022: SOX2 20726797 ChIP-Seq SW620 Human | SOX2 |
| KATNAL1 | Enrichr CHEA_2022: SOX2 20726797 ChIP-Seq SW620 Human | SOX2 |
| NEIL2   | Enrichr CHEA_2022: SOX2 20726797 ChIP-Seq SW620 Human | SOX2 |
| OBSL1   | Enrichr CHEA_2022: SOX2 20726797 ChIP-Seq SW620 Human | SOX2 |
| DCP1B   | Enrichr CHEA_2022: SOX2 20726797 ChIP-Seq SW620 Human | SOX2 |
| IFITM1  | Enrichr CHEA_2022: SOX2 20726797 ChIP-Seq SW620 Human | SOX2 |
| CBLC    | Enrichr CHEA_2022: SOX2 20726797 ChIP-Seq SW620 Human | SOX2 |
| CALML4  | Enrichr CHEA_2022: SOX2 20726797 ChIP-Seq SW620 Human | SOX2 |
| AQP5    | Enrichr CHEA_2022: SOX2 20726797 ChIP-Seq SW620 Human | SOX2 |
| AQP3    | Enrichr CHEA_2022: SOX2 20726797 ChIP-Seq SW620 Human | SOX2 |
| APCDD1  | Enrichr CHEA_2022: SOX2 20726797 ChIP-Seq SW620 Human | SOX2 |
| MTHFD1L | Enrichr CHEA_2022: SOX2 20726797 ChIP-Seq SW620 Human | SOX2 |
| STXBP6  | Enrichr CHEA_2022: SOX2 20726797 ChIP-Seq SW620 Human | SOX2 |
| RFFL    | Enrichr CHEA_2022: SOX2 20726797 ChIP-Seq SW620 Human | SOX2 |
| HLA-E   | Enrichr CHEA_2022: SOX2 20726797 ChIP-Seq SW620 Human | SOX2 |
| VASP    | Enrichr CHEA_2022: SOX2 20726797 ChIP-Seq SW620 Human | SOX2 |
| VNN1    | Enrichr CHEA_2022: SOX2 20726797 ChIP-Seq SW620 Human | SOX2 |
| SMTN    | Enrichr CHEA_2022: SOX2 20726797 ChIP-Seq SW620 Human | SOX2 |
| SPRR1A  | Enrichr CHEA_2022: SOX2 20726797 ChIP-Seq SW620 Human | SOX2 |
| RPS23   | Enrichr CHEA_2022: SOX2 20726797 ChIP-Seq SW620 Human | SOX2 |
| SIM2    | Enrichr CHEA_2022: SOX2 20726797 ChIP-Seq SW620 Human | SOX2 |
| SPRR1B  | Enrichr CHEA_2022: SOX2 20726797 ChIP-Seq SW620 Human | SOX2 |
| CFTR    | Enrichr CHEA_2022: SOX2 20726797 ChIP-Seq SW620 Human | SOX2 |
| IL1RN   | Enrichr CHEA_2022: SOX2 20726797 ChIP-Seq SW620 Human | SOX2 |
| MAGED2  | Enrichr CHEA_2022: SOX2 20726797 ChIP-Seq SW620 Human | SOX2 |
| DCUN1D4 | Enrichr CHEA_2022: SOX2 20726797 ChIP-Seq SW620 Human | SOX2 |
| FAM89A  | Enrichr CHEA_2022: SOX2 20726797 ChIP-Seq SW620 Human | SOX2 |
| PPL     | Enrichr CHEA_2022: SOX2 20726797 ChIP-Seq SW620 Human | SOX2 |
| IFIT2   | Enrichr CHEA_2022: SOX2 20726797 ChIP-Seq SW620 Human | SOX2 |
| IFIT1   | Enrichr CHEA_2022: SOX2 20726797 ChIP-Seq SW620 Human | SOX2 |
| TRPM2   | Enrichr CHEA_2022: SOX2 20726797 ChIP-Seq SW620 Human | SOX2 |
| PDK4    | Enrichr CHEA_2022: SOX2 20726797 ChIP-Seq SW620 Human | SOX2 |
| PDK1    | Enrichr CHEA_2022: SOX2 20726797 ChIP-Seq SW620 Human | SOX2 |
| RALGPS2 | Enrichr CHEA_2022: SOX2 20726797 ChIP-Seq SW620 Human | SOX2 |
| TRPM4   | Enrichr CHEA_2022: SOX2 20726797 ChIP-Seq SW620 Human | SOX2 |
| PDK3    | Enrichr CHEA_2022: SOX2 20726797 ChIP-Seq SW620 Human | SOX2 |
| PSENEN  | Enrichr CHEA_2022: SOX2 20726797 ChIP-Seq SW620 Human | SOX2 |
| EDN1    | Enrichr CHEA_2022: SOX2 20726797 ChIP-Seq SW620 Human | SOX2 |
| HEG1    | Enrichr CHEA_2022: SOX2 20726797 ChIP-Seq SW620 Human | SOX2 |
| UBL4A   | Enrichr CHEA_2022: SOX2 20726797 ChIP-Seq SW620 Human | SOX2 |
| MLF1    | Enrichr CHEA_2022: SOX2 20726797 ChIP-Seq SW620 Human | SOX2 |
| MTSS1   | Enrichr CHEA_2022: SOX2 20726797 ChIP-Seq SW620 Human | SOX2 |
| CLDN11  | Enrichr CHEA_2022: SOX2 20726797 ChIP-Seq SW620 Human | SOX2 |
| KBTBD7  | Enrichr CHEA_2022: SOX2 20726797 ChIP-Seq SW620 Human | SOX2 |
| P4HA2   | Enrichr CHEA_2022: SOX2 20726797 ChIP-Seq SW620 Human | SOX2 |
| VWA1    | Enrichr CHEA_2022: SOX2 20726797 ChIP-Seq SW620 Human | SOX2 |
| TLR4    | Enrichr CHEA_2022: SOX2 20726797 ChIP-Seq SW620 Human | SOX2 |
| RAB7B   | Enrichr CHEA_2022: SOX2 20726797 ChIP-Seq SW620 Human | SOX2 |
| SLC44A4 | Enrichr CHEA_2022: SOX2 20726797 ChIP-Seq SW620 Human | SOX2 |
| CITED1  | Enrichr CHEA_2022: SOX2 20726797 ChIP-Seq SW620 Human | SOX2 |
| RTN4R   | Enrichr CHEA_2022: SOX2 20726797 ChIP-Seq SW620 Human | SOX2 |
| SLC44A2 | Enrichr CHEA_2022: SOX2 20726797 ChIP-Seq SW620 Human | SOX2 |
| FAM43A  | Enrichr CHEA_2022: SOX2 20726797 ChIP-Seq SW620 Human | SOX2 |
| CAB39L  | Enrichr CHEA_2022: SOX2 20726797 ChIP-Seq SW620 Human | SOX2 |
| SLC44A1 | Enrichr CHEA_2022: SOX2 20726797 ChIP-Seq SW620 Human | SOX2 |
| CHRAC1  | Enrichr CHEA_2022: SOX2 20726797 ChIP-Seq SW620 Human | SOX2 |

|          |                                                       |      |
|----------|-------------------------------------------------------|------|
| SLC22A15 | Enrichr CHEA_2022: SOX2 20726797 ChIP-Seq SW620 Human | SOX2 |
| UGCG     | Enrichr CHEA_2022: SOX2 20726797 ChIP-Seq SW620 Human | SOX2 |
| SLC22A18 | Enrichr CHEA_2022: SOX2 20726797 ChIP-Seq SW620 Human | SOX2 |
| C1QBP    | Enrichr CHEA_2022: SOX2 20726797 ChIP-Seq SW620 Human | SOX2 |
| TMED3    | Enrichr CHEA_2022: SOX2 20726797 ChIP-Seq SW620 Human | SOX2 |
| TMED8    | Enrichr CHEA_2022: SOX2 20726797 ChIP-Seq SW620 Human | SOX2 |
| TMED5    | Enrichr CHEA_2022: SOX2 20726797 ChIP-Seq SW620 Human | SOX2 |
| MYEF2    | Enrichr CHEA_2022: SOX2 20726797 ChIP-Seq SW620 Human | SOX2 |
| PARP4    | Enrichr CHEA_2022: SOX2 20726797 ChIP-Seq SW620 Human | SOX2 |
| CBR1     | Enrichr CHEA_2022: SOX2 20726797 ChIP-Seq SW620 Human | SOX2 |
| PARP2    | Enrichr CHEA_2022: SOX2 20726797 ChIP-Seq SW620 Human | SOX2 |
| METTL3   | Enrichr CHEA_2022: SOX2 20726797 ChIP-Seq SW620 Human | SOX2 |
| PROX1    | Enrichr CHEA_2022: SOX2 20726797 ChIP-Seq SW620 Human | SOX2 |
| SORBS1   | Enrichr CHEA_2022: SOX2 20726797 ChIP-Seq SW620 Human | SOX2 |
| QPCT     | Enrichr CHEA_2022: SOX2 20726797 ChIP-Seq SW620 Human | SOX2 |
| SORBS2   | Enrichr CHEA_2022: SOX2 20726797 ChIP-Seq SW620 Human | SOX2 |
| RAB11A   | Enrichr CHEA_2022: SOX2 20726797 ChIP-Seq SW620 Human | SOX2 |
| GFRA3    | Enrichr CHEA_2022: SOX2 20726797 ChIP-Seq SW620 Human | SOX2 |
| LIMA1    | Enrichr CHEA_2022: SOX2 20726797 ChIP-Seq SW620 Human | SOX2 |
| PARP9    | Enrichr CHEA_2022: SOX2 20726797 ChIP-Seq SW620 Human | SOX2 |
| PDP2     | Enrichr CHEA_2022: SOX2 20726797 ChIP-Seq SW620 Human | SOX2 |
| ALDH5A1  | Enrichr CHEA_2022: SOX2 20726797 ChIP-Seq SW620 Human | SOX2 |
| GDPD1    | Enrichr CHEA_2022: SOX2 20726797 ChIP-Seq SW620 Human | SOX2 |
| RAB9A    | Enrichr CHEA_2022: SOX2 20726797 ChIP-Seq SW620 Human | SOX2 |
| CSTB     | Enrichr CHEA_2022: SOX2 20726797 ChIP-Seq SW620 Human | SOX2 |
| GBE1     | Enrichr CHEA_2022: SOX2 20726797 ChIP-Seq SW620 Human | SOX2 |
| SIPA1L3  | Enrichr CHEA_2022: SOX2 20726797 ChIP-Seq SW620 Human | SOX2 |
| CST7     | Enrichr CHEA_2022: SOX2 20726797 ChIP-Seq SW620 Human | SOX2 |
| ROBO1    | Enrichr CHEA_2022: SOX2 20726797 ChIP-Seq SW620 Human | SOX2 |
| CST6     | Enrichr CHEA_2022: SOX2 20726797 ChIP-Seq SW620 Human | SOX2 |
| NKAP     | Enrichr CHEA_2022: SOX2 20726797 ChIP-Seq SW620 Human | SOX2 |
| RPAIN    | Enrichr CHEA_2022: SOX2 20726797 ChIP-Seq SW620 Human | SOX2 |
| SIPA1L1  | Enrichr CHEA_2022: SOX2 20726797 ChIP-Seq SW620 Human | SOX2 |
| SIPA1L2  | Enrichr CHEA_2022: SOX2 20726797 ChIP-Seq SW620 Human | SOX2 |
| SOSTDC1  | Enrichr CHEA_2022: SOX2 20726797 ChIP-Seq SW620 Human | SOX2 |
| LMO2     | Enrichr CHEA_2022: SOX2 20726797 ChIP-Seq SW620 Human | SOX2 |
| GABRP    | Enrichr CHEA_2022: SOX2 20726797 ChIP-Seq SW620 Human | SOX2 |
| LMO4     | Enrichr CHEA_2022: SOX2 20726797 ChIP-Seq SW620 Human | SOX2 |
| TRPV2    | Enrichr CHEA_2022: SOX2 20726797 ChIP-Seq SW620 Human | SOX2 |
| GRHL2    | Enrichr CHEA_2022: SOX2 20726797 ChIP-Seq SW620 Human | SOX2 |
| ATP1B1   | Enrichr CHEA_2022: SOX2 20726797 ChIP-Seq SW620 Human | SOX2 |
| TATDN1   | Enrichr CHEA_2022: SOX2 20726797 ChIP-Seq SW620 Human | SOX2 |
| AIG1     | Enrichr CHEA_2022: SOX2 20726797 ChIP-Seq SW620 Human | SOX2 |
| GRHL1    | Enrichr CHEA_2022: SOX2 20726797 ChIP-Seq SW620 Human | SOX2 |
| BAMBI    | Enrichr CHEA_2022: SOX2 20726797 ChIP-Seq SW620 Human | SOX2 |
| FANCD2   | Enrichr CHEA_2022: SOX2 20726797 ChIP-Seq SW620 Human | SOX2 |
| TRPV6    | Enrichr CHEA_2022: SOX2 20726797 ChIP-Seq SW620 Human | SOX2 |
| CRYL1    | Enrichr CHEA_2022: SOX2 20726797 ChIP-Seq SW620 Human | SOX2 |
| CHMP4B   | Enrichr CHEA_2022: SOX2 20726797 ChIP-Seq SW620 Human | SOX2 |
| MYADM    | Enrichr CHEA_2022: SOX2 20726797 ChIP-Seq SW620 Human | SOX2 |
| BRWD1    | Enrichr CHEA_2022: SOX2 20726797 ChIP-Seq SW620 Human | SOX2 |
| LRP10    | Enrichr CHEA_2022: SOX2 20726797 ChIP-Seq SW620 Human | SOX2 |
| MPHOSPH6 | Enrichr CHEA_2022: SOX2 20726797 ChIP-Seq SW620 Human | SOX2 |
| XPR1     | Enrichr CHEA_2022: SOX2 20726797 ChIP-Seq SW620 Human | SOX2 |
| PVR      | Enrichr CHEA_2022: SOX2 20726797 ChIP-Seq SW620 Human | SOX2 |
| FBLN1    | Enrichr CHEA_2022: SOX2 20726797 ChIP-Seq SW620 Human | SOX2 |
| NKD1     | Enrichr CHEA_2022: SOX2 20726797 ChIP-Seq SW620 Human | SOX2 |
| COMT     | Enrichr CHEA_2022: SOX2 20726797 ChIP-Seq SW620 Human | SOX2 |
| CNDP2    | Enrichr CHEA_2022: SOX2 20726797 ChIP-Seq SW620 Human | SOX2 |

|         |                                                       |      |
|---------|-------------------------------------------------------|------|
| HOXA13  | Enrichr CHEA_2022: SOX2 20726797 ChIP-Seq SW620 Human | SOX2 |
| LMNA    | Enrichr CHEA_2022: SOX2 20726797 ChIP-Seq SW620 Human | SOX2 |
| DOCK11  | Enrichr CHEA_2022: SOX2 20726797 ChIP-Seq SW620 Human | SOX2 |
| NT5E    | Enrichr CHEA_2022: SOX2 20726797 ChIP-Seq SW620 Human | SOX2 |
| PURB    | Enrichr CHEA_2022: SOX2 20726797 ChIP-Seq SW620 Human | SOX2 |
| KISS1R  | Enrichr CHEA_2022: SOX2 20726797 ChIP-Seq SW620 Human | SOX2 |
| GAS2L1  | Enrichr CHEA_2022: SOX2 20726797 ChIP-Seq SW620 Human | SOX2 |
| EIF2S3  | Enrichr CHEA_2022: SOX2 20726797 ChIP-Seq SW620 Human | SOX2 |
| EIF2S1  | Enrichr CHEA_2022: SOX2 20726797 ChIP-Seq SW620 Human | SOX2 |
| DIAPH1  | Enrichr CHEA_2022: SOX2 20726797 ChIP-Seq SW620 Human | SOX2 |
| EFNA4   | Enrichr CHEA_2022: SOX2 20726797 ChIP-Seq SW620 Human | SOX2 |
| PRPF8   | Enrichr CHEA_2022: SOX2 20726797 ChIP-Seq SW620 Human | SOX2 |
| COL6A1  | Enrichr CHEA_2022: SOX2 20726797 ChIP-Seq SW620 Human | SOX2 |
| DDAH1   | Enrichr CHEA_2022: SOX2 20726797 ChIP-Seq SW620 Human | SOX2 |
| CDH13   | Enrichr CHEA_2022: SOX2 20726797 ChIP-Seq SW620 Human | SOX2 |
| FGFR1   | Enrichr CHEA_2022: SOX2 20726797 ChIP-Seq SW620 Human | SOX2 |
| CHMP2A  | Enrichr CHEA_2022: SOX2 20726797 ChIP-Seq SW620 Human | SOX2 |
| FGFR3   | Enrichr CHEA_2022: SOX2 20726797 ChIP-Seq SW620 Human | SOX2 |
| ZCCHC2  | Enrichr CHEA_2022: SOX2 20726797 ChIP-Seq SW620 Human | SOX2 |
| FGFR2   | Enrichr CHEA_2022: SOX2 20726797 ChIP-Seq SW620 Human | SOX2 |
| PXK     | Enrichr CHEA_2022: SOX2 20726797 ChIP-Seq SW620 Human | SOX2 |
| LZIC    | Enrichr CHEA_2022: SOX2 20726797 ChIP-Seq SW620 Human | SOX2 |
| RASEF   | Enrichr CHEA_2022: SOX2 20726797 ChIP-Seq SW620 Human | SOX2 |
| SPPL2A  | Enrichr CHEA_2022: SOX2 20726797 ChIP-Seq SW620 Human | SOX2 |
| RBMX2   | Enrichr CHEA_2022: SOX2 20726797 ChIP-Seq SW620 Human | SOX2 |
| EME2    | Enrichr CHEA_2022: SOX2 20726797 ChIP-Seq SW620 Human | SOX2 |
| PMAIP1  | Enrichr CHEA_2022: SOX2 20726797 ChIP-Seq SW620 Human | SOX2 |
| MLKL    | Enrichr CHEA_2022: SOX2 20726797 ChIP-Seq SW620 Human | SOX2 |
| SACS    | Enrichr CHEA_2022: SOX2 20726797 ChIP-Seq SW620 Human | SOX2 |
| CYP2J2  | Enrichr CHEA_2022: SOX2 20726797 ChIP-Seq SW620 Human | SOX2 |
| CBX6    | Enrichr CHEA_2022: SOX2 20726797 ChIP-Seq SW620 Human | SOX2 |
| CBX4    | Enrichr CHEA_2022: SOX2 20726797 ChIP-Seq SW620 Human | SOX2 |
| CBX2    | Enrichr CHEA_2022: SOX2 20726797 ChIP-Seq SW620 Human | SOX2 |
| PARVB   | Enrichr CHEA_2022: SOX2 20726797 ChIP-Seq SW620 Human | SOX2 |
| IQCE    | Enrichr CHEA_2022: SOX2 20726797 ChIP-Seq SW620 Human | SOX2 |
| OAS1    | Enrichr CHEA_2022: SOX2 20726797 ChIP-Seq SW620 Human | SOX2 |
| DNM1    | Enrichr CHEA_2022: SOX2 20726797 ChIP-Seq SW620 Human | SOX2 |
| RBKS    | Enrichr CHEA_2022: SOX2 20726797 ChIP-Seq SW620 Human | SOX2 |
| RASA1   | Enrichr CHEA_2022: SOX2 20726797 ChIP-Seq SW620 Human | SOX2 |
| RABEP1  | Enrichr CHEA_2022: SOX2 20726797 ChIP-Seq SW620 Human | SOX2 |
| RASA4   | Enrichr CHEA_2022: SOX2 20726797 ChIP-Seq SW620 Human | SOX2 |
| OAS3    | Enrichr CHEA_2022: SOX2 20726797 ChIP-Seq SW620 Human | SOX2 |
| AKT1S1  | Enrichr CHEA_2022: SOX2 20726797 ChIP-Seq SW620 Human | SOX2 |
| BLMH    | Enrichr CHEA_2022: SOX2 20726797 ChIP-Seq SW620 Human | SOX2 |
| DNASE2  | Enrichr CHEA_2022: SOX2 20726797 ChIP-Seq SW620 Human | SOX2 |
| TERF2IP | Enrichr CHEA_2022: SOX2 20726797 ChIP-Seq SW620 Human | SOX2 |
| TRPS1   | Enrichr CHEA_2022: SOX2 20726797 ChIP-Seq SW620 Human | SOX2 |
| SLC40A1 | Enrichr CHEA_2022: SOX2 20726797 ChIP-Seq SW620 Human | SOX2 |
| ERICH1  | Enrichr CHEA_2022: SOX2 20726797 ChIP-Seq SW620 Human | SOX2 |
| FAM83H  | Enrichr CHEA_2022: SOX2 20726797 ChIP-Seq SW620 Human | SOX2 |
| WNT11   | Enrichr CHEA_2022: SOX2 20726797 ChIP-Seq SW620 Human | SOX2 |
| CASP6   | Enrichr CHEA_2022: SOX2 20726797 ChIP-Seq SW620 Human | SOX2 |
| CASP7   | Enrichr CHEA_2022: SOX2 20726797 ChIP-Seq SW620 Human | SOX2 |
| CASP4   | Enrichr CHEA_2022: SOX2 20726797 ChIP-Seq SW620 Human | SOX2 |
| SNAPC5  | Enrichr CHEA_2022: SOX2 20726797 ChIP-Seq SW620 Human | SOX2 |
| FAM83A  | Enrichr CHEA_2022: SOX2 20726797 ChIP-Seq SW620 Human | SOX2 |
| MYEOV   | Enrichr CHEA_2022: SOX2 20726797 ChIP-Seq SW620 Human | SOX2 |
| SNAPC1  | Enrichr CHEA_2022: SOX2 20726797 ChIP-Seq SW620 Human | SOX2 |
| LONRF1  | Enrichr CHEA_2022: SOX2 20726797 ChIP-Seq SW620 Human | SOX2 |

|           |                                                       |      |
|-----------|-------------------------------------------------------|------|
| FAM83B    | Enrichr CHEA_2022: SOX2 20726797 ChIP-Seq SW620 Human | SOX2 |
| RHBDF1    | Enrichr CHEA_2022: SOX2 20726797 ChIP-Seq SW620 Human | SOX2 |
| IL15RA    | Enrichr CHEA_2022: SOX2 20726797 ChIP-Seq SW620 Human | SOX2 |
| TMEM30B   | Enrichr CHEA_2022: SOX2 20726797 ChIP-Seq SW620 Human | SOX2 |
| PLAUR     | Enrichr CHEA_2022: SOX2 20726797 ChIP-Seq SW620 Human | SOX2 |
| LSR       | Enrichr CHEA_2022: SOX2 20726797 ChIP-Seq SW620 Human | SOX2 |
| ANXA10    | Enrichr CHEA_2022: SOX2 20726797 ChIP-Seq SW620 Human | SOX2 |
| TIAM1     | Enrichr CHEA_2022: SOX2 20726797 ChIP-Seq SW620 Human | SOX2 |
| MLPH      | Enrichr CHEA_2022: SOX2 20726797 ChIP-Seq SW620 Human | SOX2 |
| TRAPPC6A  | Enrichr CHEA_2022: SOX2 20726797 ChIP-Seq SW620 Human | SOX2 |
| ALDH1A1   | Enrichr CHEA_2022: SOX2 20726797 ChIP-Seq SW620 Human | SOX2 |
| PPP2R2C   | Enrichr CHEA_2022: SOX2 20726797 ChIP-Seq SW620 Human | SOX2 |
| ALDH1A3   | Enrichr CHEA_2022: SOX2 20726797 ChIP-Seq SW620 Human | SOX2 |
| DDIT4     | Enrichr CHEA_2022: SOX2 20726797 ChIP-Seq SW620 Human | SOX2 |
| DDIT3     | Enrichr CHEA_2022: SOX2 20726797 ChIP-Seq SW620 Human | SOX2 |
| CLOCK     | Enrichr CHEA_2022: SOX2 20726797 ChIP-Seq SW620 Human | SOX2 |
| SIX1      | Enrichr CHEA_2022: SOX2 20726797 ChIP-Seq SW620 Human | SOX2 |
| THBS1     | Enrichr CHEA_2022: SOX2 20726797 ChIP-Seq SW620 Human | SOX2 |
| OASL      | Enrichr CHEA_2022: SOX2 20726797 ChIP-Seq SW620 Human | SOX2 |
| GNA14     | Enrichr CHEA_2022: SOX2 20726797 ChIP-Seq SW620 Human | SOX2 |
| GNA15     | Enrichr CHEA_2022: SOX2 20726797 ChIP-Seq SW620 Human | SOX2 |
| HEPH      | Enrichr CHEA_2022: SOX2 20726797 ChIP-Seq SW620 Human | SOX2 |
| ARHGDI3   | Enrichr CHEA_2022: SOX2 20726797 ChIP-Seq SW620 Human | SOX2 |
| LEPROTL1  | Enrichr CHEA_2022: SOX2 20726797 ChIP-Seq SW620 Human | SOX2 |
| RPS6KA2   | Enrichr CHEA_2022: SOX2 20726797 ChIP-Seq SW620 Human | SOX2 |
| B3GALNT1  | Enrichr CHEA_2022: SOX2 20726797 ChIP-Seq SW620 Human | SOX2 |
| GDAP1     | Enrichr CHEA_2022: SOX2 20726797 ChIP-Seq SW620 Human | SOX2 |
| WDHD1     | Enrichr CHEA_2022: SOX2 20726797 ChIP-Seq SW620 Human | SOX2 |
| PSMB9     | Enrichr CHEA_2022: SOX2 20726797 ChIP-Seq SW620 Human | SOX2 |
| EML4      | Enrichr CHEA_2022: SOX2 20726797 ChIP-Seq SW620 Human | SOX2 |
| MYL5      | Enrichr CHEA_2022: SOX2 20726797 ChIP-Seq SW620 Human | SOX2 |
| RBP4      | Enrichr CHEA_2022: SOX2 20726797 ChIP-Seq SW620 Human | SOX2 |
| RBP1      | Enrichr CHEA_2022: SOX2 20726797 ChIP-Seq SW620 Human | SOX2 |
| LETMD1    | Enrichr CHEA_2022: SOX2 20726797 ChIP-Seq SW620 Human | SOX2 |
| LEF1      | Enrichr CHEA_2022: SOX2 20726797 ChIP-Seq SW620 Human | SOX2 |
| CGGBP1    | Enrichr CHEA_2022: SOX2 20726797 ChIP-Seq SW620 Human | SOX2 |
| PDXK      | Enrichr CHEA_2022: SOX2 20726797 ChIP-Seq SW620 Human | SOX2 |
| ZNF274    | Enrichr CHEA_2022: SOX2 20726797 ChIP-Seq SW620 Human | SOX2 |
| ZNF273    | Enrichr CHEA_2022: SOX2 20726797 ChIP-Seq SW620 Human | SOX2 |
| IER5L     | Enrichr CHEA_2022: SOX2 20726797 ChIP-Seq SW620 Human | SOX2 |
| FZD10     | Enrichr CHEA_2022: SOX2 20726797 ChIP-Seq SW620 Human | SOX2 |
| ARAF      | Enrichr CHEA_2022: SOX2 20726797 ChIP-Seq SW620 Human | SOX2 |
| CLDN3     | Enrichr CHEA_2022: SOX2 20726797 ChIP-Seq SW620 Human | SOX2 |
| CLDN1     | Enrichr CHEA_2022: SOX2 20726797 ChIP-Seq SW620 Human | SOX2 |
| KRTCAP3   | Enrichr CHEA_2022: SOX2 20726797 ChIP-Seq SW620 Human | SOX2 |
| PREX1     | Enrichr CHEA_2022: SOX2 20726797 ChIP-Seq SW620 Human | SOX2 |
| DNTTIP1   | Enrichr CHEA_2022: SOX2 20726797 ChIP-Seq SW620 Human | SOX2 |
| SNCG      | Enrichr CHEA_2022: SOX2 20726797 ChIP-Seq SW620 Human | SOX2 |
| STAT6     | Enrichr CHEA_2022: SOX2 20726797 ChIP-Seq SW620 Human | SOX2 |
| RABAC1    | Enrichr CHEA_2022: SOX2 20726797 ChIP-Seq SW620 Human | SOX2 |
| GBP3      | Enrichr CHEA_2022: SOX2 20726797 ChIP-Seq SW620 Human | SOX2 |
| GBP2      | Enrichr CHEA_2022: SOX2 20726797 ChIP-Seq SW620 Human | SOX2 |
| HES6      | Enrichr CHEA_2022: SOX2 20726797 ChIP-Seq SW620 Human | SOX2 |
| NGFR      | Enrichr CHEA_2022: SOX2 20726797 ChIP-Seq SW620 Human | SOX2 |
| MYH7B     | Enrichr CHEA_2022: SOX2 20726797 ChIP-Seq SW620 Human | SOX2 |
| KLF12     | Enrichr CHEA_2022: SOX2 20726797 ChIP-Seq SW620 Human | SOX2 |
| ZNF264    | Enrichr CHEA_2022: SOX2 20726797 ChIP-Seq SW620 Human | SOX2 |
| GABARAPL1 | Enrichr CHEA_2022: SOX2 20726797 ChIP-Seq SW620 Human | SOX2 |
| FIBCD1    | Enrichr CHEA_2022: SOX2 20726797 ChIP-Seq SW620 Human | SOX2 |

|          |                                                       |      |
|----------|-------------------------------------------------------|------|
| LATS2    | Enrichr CHEA_2022: SOX2 20726797 ChIP-Seq SW620 Human | SOX2 |
| MLLT11   | Enrichr CHEA_2022: SOX2 20726797 ChIP-Seq SW620 Human | SOX2 |
| IL22RA1  | Enrichr CHEA_2022: SOX2 20726797 ChIP-Seq SW620 Human | SOX2 |
| PRKAR1B  | Enrichr CHEA_2022: SOX2 20726797 ChIP-Seq SW620 Human | SOX2 |
| VAMP1    | Enrichr CHEA_2022: SOX2 20726797 ChIP-Seq SW620 Human | SOX2 |
| PADI2    | Enrichr CHEA_2022: SOX2 20726797 ChIP-Seq SW620 Human | SOX2 |
| VAMP3    | Enrichr CHEA_2022: SOX2 20726797 ChIP-Seq SW620 Human | SOX2 |
| MCPH1    | Enrichr CHEA_2022: SOX2 20726797 ChIP-Seq SW620 Human | SOX2 |
| PADI1    | Enrichr CHEA_2022: SOX2 20726797 ChIP-Seq SW620 Human | SOX2 |
| LXN      | Enrichr CHEA_2022: SOX2 20726797 ChIP-Seq SW620 Human | SOX2 |
| SCHIP1   | Enrichr CHEA_2022: SOX2 20726797 ChIP-Seq SW620 Human | SOX2 |
| UXS1     | Enrichr CHEA_2022: SOX2 20726797 ChIP-Seq SW620 Human | SOX2 |
| MRPL13   | Enrichr CHEA_2022: SOX2 20726797 ChIP-Seq SW620 Human | SOX2 |
| TMEM92   | Enrichr CHEA_2022: SOX2 20726797 ChIP-Seq SW620 Human | SOX2 |
| MYLK     | Enrichr CHEA_2022: SOX2 20726797 ChIP-Seq SW620 Human | SOX2 |
| LIPG     | Enrichr CHEA_2022: SOX2 20726797 ChIP-Seq SW620 Human | SOX2 |
| NETO2    | Enrichr CHEA_2022: SOX2 20726797 ChIP-Seq SW620 Human | SOX2 |
| GRPEL2   | Enrichr CHEA_2022: SOX2 20726797 ChIP-Seq SW620 Human | SOX2 |
| IL20RA   | Enrichr CHEA_2022: SOX2 20726797 ChIP-Seq SW620 Human | SOX2 |
| KCNMB4   | Enrichr CHEA_2022: SOX2 20726797 ChIP-Seq SW620 Human | SOX2 |
| ZBTB7C   | Enrichr CHEA_2022: SOX2 20726797 ChIP-Seq SW620 Human | SOX2 |
| AMZ2     | Enrichr CHEA_2022: SOX2 20726797 ChIP-Seq SW620 Human | SOX2 |
| RHBDL2   | Enrichr CHEA_2022: SOX2 20726797 ChIP-Seq SW620 Human | SOX2 |
| ANKIB1   | Enrichr CHEA_2022: SOX2 20726797 ChIP-Seq SW620 Human | SOX2 |
| HACE1    | Enrichr CHEA_2022: SOX2 20726797 ChIP-Seq SW620 Human | SOX2 |
| UPF2     | Enrichr CHEA_2022: SOX2 20726797 ChIP-Seq SW620 Human | SOX2 |
| LYN      | Enrichr CHEA_2022: SOX2 20726797 ChIP-Seq SW620 Human | SOX2 |
| FGFBP1   | Enrichr CHEA_2022: SOX2 20726797 ChIP-Seq SW620 Human | SOX2 |
| RIPK3    | Enrichr CHEA_2022: SOX2 20726797 ChIP-Seq SW620 Human | SOX2 |
| NSUN4    | Enrichr CHEA_2022: SOX2 20726797 ChIP-Seq SW620 Human | SOX2 |
| EMP3     | Enrichr CHEA_2022: SOX2 20726797 ChIP-Seq SW620 Human | SOX2 |
| FAHD2A   | Enrichr CHEA_2022: SOX2 20726797 ChIP-Seq SW620 Human | SOX2 |
| TMCO4    | Enrichr CHEA_2022: SOX2 20726797 ChIP-Seq SW620 Human | SOX2 |
| TMC5     | Enrichr CHEA_2022: SOX2 20726797 ChIP-Seq SW620 Human | SOX2 |
| LYZ      | Enrichr CHEA_2022: SOX2 20726797 ChIP-Seq SW620 Human | SOX2 |
| TMC4     | Enrichr CHEA_2022: SOX2 20726797 ChIP-Seq SW620 Human | SOX2 |
| GPRC5A   | Enrichr CHEA_2022: SOX2 20726797 ChIP-Seq SW620 Human | SOX2 |
| LETM2    | Enrichr CHEA_2022: SOX2 20726797 ChIP-Seq SW620 Human | SOX2 |
| PIGA     | Enrichr CHEA_2022: SOX2 20726797 ChIP-Seq SW620 Human | SOX2 |
| PIGK     | Enrichr CHEA_2022: SOX2 20726797 ChIP-Seq SW620 Human | SOX2 |
| ZNF239   | Enrichr CHEA_2022: SOX2 20726797 ChIP-Seq SW620 Human | SOX2 |
| ZNF232   | Enrichr CHEA_2022: SOX2 20726797 ChIP-Seq SW620 Human | SOX2 |
| ATF7IP2  | Enrichr CHEA_2022: SOX2 20726797 ChIP-Seq SW620 Human | SOX2 |
| ACAT1    | Enrichr CHEA_2022: SOX2 20726797 ChIP-Seq SW620 Human | SOX2 |
| IQGAP1   | Enrichr CHEA_2022: SOX2 20726797 ChIP-Seq SW620 Human | SOX2 |
| LITAF    | Enrichr CHEA_2022: SOX2 20726797 ChIP-Seq SW620 Human | SOX2 |
| IQGAP2   | Enrichr CHEA_2022: SOX2 20726797 ChIP-Seq SW620 Human | SOX2 |
| MRPL38   | Enrichr CHEA_2022: SOX2 20726797 ChIP-Seq SW620 Human | SOX2 |
| LRRC1    | Enrichr CHEA_2022: SOX2 20726797 ChIP-Seq SW620 Human | SOX2 |
| AREG     | Enrichr CHEA_2022: SOX2 20726797 ChIP-Seq SW620 Human | SOX2 |
| LRRC34   | Enrichr CHEA_2022: SOX2 20726797 ChIP-Seq SW620 Human | SOX2 |
| HSD11B2  | Enrichr CHEA_2022: SOX2 20726797 ChIP-Seq SW620 Human | SOX2 |
| UGT8     | Enrichr CHEA_2022: SOX2 20726797 ChIP-Seq SW620 Human | SOX2 |
| MYO6     | Enrichr CHEA_2022: SOX2 20726797 ChIP-Seq SW620 Human | SOX2 |
| PACSIN3  | Enrichr CHEA_2022: SOX2 20726797 ChIP-Seq SW620 Human | SOX2 |
| SH3BGRL3 | Enrichr CHEA_2022: SOX2 20726797 ChIP-Seq SW620 Human | SOX2 |
| STAP2    | Enrichr CHEA_2022: SOX2 20726797 ChIP-Seq SW620 Human | SOX2 |
| CTBS     | Enrichr CHEA_2022: SOX2 20726797 ChIP-Seq SW620 Human | SOX2 |
| CGNL1    | Enrichr CHEA_2022: SOX2 20726797 ChIP-Seq SW620 Human | SOX2 |



|          |                                                       |      |
|----------|-------------------------------------------------------|------|
| ELOVL1   | Enrichr CHEA_2022: SOX2 20726797 ChIP-Seq SW620 Human | SOX2 |
| GPR37    | Enrichr CHEA_2022: SOX2 20726797 ChIP-Seq SW620 Human | SOX2 |
| NANOS1   | Enrichr CHEA_2022: SOX2 20726797 ChIP-Seq SW620 Human | SOX2 |
| AADAT    | Enrichr CHEA_2022: SOX2 20726797 ChIP-Seq SW620 Human | SOX2 |
| CSNK2A2  | Enrichr CHEA_2022: SOX2 20726797 ChIP-Seq SW620 Human | SOX2 |
| ELOVL5   | Enrichr CHEA_2022: SOX2 20726797 ChIP-Seq SW620 Human | SOX2 |
| ARG2     | Enrichr CHEA_2022: SOX2 20726797 ChIP-Seq SW620 Human | SOX2 |
| STAT3    | Enrichr CHEA_2022: SOX2 20726797 ChIP-Seq SW620 Human | SOX2 |
| TMEM62   | Enrichr CHEA_2022: SOX2 20726797 ChIP-Seq SW620 Human | SOX2 |
| TRNT1    | Enrichr CHEA_2022: SOX2 20726797 ChIP-Seq SW620 Human | SOX2 |
| ELOVL7   | Enrichr CHEA_2022: SOX2 20726797 ChIP-Seq SW620 Human | SOX2 |
| RNASE4   | Enrichr CHEA_2022: SOX2 20726797 ChIP-Seq SW620 Human | SOX2 |
| TMEM65   | Enrichr CHEA_2022: SOX2 20726797 ChIP-Seq SW620 Human | SOX2 |
| LRG1     | Enrichr CHEA_2022: SOX2 20726797 ChIP-Seq SW620 Human | SOX2 |
| F5       | Enrichr CHEA_2022: SOX2 20726797 ChIP-Seq SW620 Human | SOX2 |
| FABP5    | Enrichr CHEA_2022: SOX2 20726797 ChIP-Seq SW620 Human | SOX2 |
| MRPL52   | Enrichr CHEA_2022: SOX2 20726797 ChIP-Seq SW620 Human | SOX2 |
| AADAC    | Enrichr CHEA_2022: SOX2 20726797 ChIP-Seq SW620 Human | SOX2 |
| PELI1    | Enrichr CHEA_2022: SOX2 20726797 ChIP-Seq SW620 Human | SOX2 |
| GOPC     | Enrichr CHEA_2022: SOX2 20726797 ChIP-Seq SW620 Human | SOX2 |
| ZNF697   | Enrichr CHEA_2022: SOX2 20726797 ChIP-Seq SW620 Human | SOX2 |
| ZNF211   | Enrichr CHEA_2022: SOX2 20726797 ChIP-Seq SW620 Human | SOX2 |
| PIGV     | Enrichr CHEA_2022: SOX2 20726797 ChIP-Seq SW620 Human | SOX2 |
| RNASEL   | Enrichr CHEA_2022: SOX2 20726797 ChIP-Seq SW620 Human | SOX2 |
| QPRT     | Enrichr CHEA_2022: SOX2 20726797 ChIP-Seq SW620 Human | SOX2 |
| F13A1    | Enrichr CHEA_2022: SOX2 20726797 ChIP-Seq SW620 Human | SOX2 |
| TMEM51   | Enrichr CHEA_2022: SOX2 20726797 ChIP-Seq SW620 Human | SOX2 |
| TMEM54   | Enrichr CHEA_2022: SOX2 20726797 ChIP-Seq SW620 Human | SOX2 |
| JPH1     | Enrichr CHEA_2022: SOX2 20726797 ChIP-Seq SW620 Human | SOX2 |
| PTGS1    | Enrichr CHEA_2022: SOX2 20726797 ChIP-Seq SW620 Human | SOX2 |
| PTGS2    | Enrichr CHEA_2022: SOX2 20726797 ChIP-Seq SW620 Human | SOX2 |
| NSDHL    | Enrichr CHEA_2022: SOX2 20726797 ChIP-Seq SW620 Human | SOX2 |
| HEY1     | Enrichr CHEA_2022: SOX2 20726797 ChIP-Seq SW620 Human | SOX2 |
| TMEM47   | Enrichr CHEA_2022: SOX2 20726797 ChIP-Seq SW620 Human | SOX2 |
| ZNF207   | Enrichr CHEA_2022: SOX2 20726797 ChIP-Seq SW620 Human | SOX2 |
| MYLIP    | Enrichr CHEA_2022: SOX2 20726797 ChIP-Seq SW620 Human | SOX2 |
| AGTPBP1  | Enrichr CHEA_2022: SOX2 20726797 ChIP-Seq SW620 Human | SOX2 |
| SEC24B   | Enrichr CHEA_2022: SOX2 20726797 ChIP-Seq SW620 Human | SOX2 |
| GK       | Enrichr CHEA_2022: SOX2 20726797 ChIP-Seq SW620 Human | SOX2 |
| S100A3   | Enrichr CHEA_2022: SOX2 20726797 ChIP-Seq SW620 Human | SOX2 |
| BRPF3    | Enrichr CHEA_2022: SOX2 20726797 ChIP-Seq SW620 Human | SOX2 |
| S100A2   | Enrichr CHEA_2022: SOX2 20726797 ChIP-Seq SW620 Human | SOX2 |
| CRYBB2   | Enrichr CHEA_2022: SOX2 20726797 ChIP-Seq SW620 Human | SOX2 |
| ZBTB10   | Enrichr CHEA_2022: SOX2 20726797 ChIP-Seq SW620 Human | SOX2 |
| SAP30    | Enrichr CHEA_2022: SOX2 20726797 ChIP-Seq SW620 Human | SOX2 |
| MAPKAPK3 | Enrichr CHEA_2022: SOX2 20726797 ChIP-Seq SW620 Human | SOX2 |
| RIMBP2   | Enrichr CHEA_2022: SOX2 20726797 ChIP-Seq SW620 Human | SOX2 |
| SQSTM1   | Enrichr CHEA_2022: SOX2 20726797 ChIP-Seq SW620 Human | SOX2 |
| SEC24D   | Enrichr CHEA_2022: SOX2 20726797 ChIP-Seq SW620 Human | SOX2 |
| ROR1     | Enrichr CHEA_2022: SOX2 20726797 ChIP-Seq SW620 Human | SOX2 |
| UTRN     | Enrichr CHEA_2022: SOX2 20726797 ChIP-Seq SW620 Human | SOX2 |
| DSC2     | Enrichr CHEA_2022: SOX2 20726797 ChIP-Seq SW620 Human | SOX2 |
| UGT1A10  | Enrichr CHEA_2022: SOX2 20726797 ChIP-Seq SW620 Human | SOX2 |
| HDDC2    | Enrichr CHEA_2022: SOX2 20726797 ChIP-Seq SW620 Human | SOX2 |
| TMF1     | Enrichr CHEA_2022: SOX2 20726797 ChIP-Seq SW620 Human | SOX2 |
| UBE2D3   | Enrichr CHEA_2022: SOX2 20726797 ChIP-Seq SW620 Human | SOX2 |
| HP       | Enrichr CHEA_2022: SOX2 20726797 ChIP-Seq SW620 Human | SOX2 |
| UCP2     | Enrichr CHEA_2022: SOX2 20726797 ChIP-Seq SW620 Human | SOX2 |
| DEFB1    | Enrichr CHEA_2022: SOX2 20726797 ChIP-Seq SW620 Human | SOX2 |

|           |                                                       |      |
|-----------|-------------------------------------------------------|------|
| CXCL16    | Enrichr CHEA_2022: SOX2 20726797 ChIP-Seq SW620 Human | SOX2 |
| SH3BP2    | Enrichr CHEA_2022: SOX2 20726797 ChIP-Seq SW620 Human | SOX2 |
| HAS2      | Enrichr CHEA_2022: SOX2 20726797 ChIP-Seq SW620 Human | SOX2 |
| SH3BP5    | Enrichr CHEA_2022: SOX2 20726797 ChIP-Seq SW620 Human | SOX2 |
| HAS3      | Enrichr CHEA_2022: SOX2 20726797 ChIP-Seq SW620 Human | SOX2 |
| SLC16A9   | Enrichr CHEA_2022: SOX2 20726797 ChIP-Seq SW620 Human | SOX2 |
| SLC16A4   | Enrichr CHEA_2022: SOX2 20726797 ChIP-Seq SW620 Human | SOX2 |
| PITX2     | Enrichr CHEA_2022: SOX2 20726797 ChIP-Seq SW620 Human | SOX2 |
| SLC16A5   | Enrichr CHEA_2022: SOX2 20726797 ChIP-Seq SW620 Human | SOX2 |
| ATP9A     | Enrichr CHEA_2022: SOX2 20726797 ChIP-Seq SW620 Human | SOX2 |
| SLC16A6   | Enrichr CHEA_2022: SOX2 20726797 ChIP-Seq SW620 Human | SOX2 |
| SLC38A2   | Enrichr CHEA_2022: SOX2 20726797 ChIP-Seq SW620 Human | SOX2 |
| TNFRSF10B | Enrichr CHEA_2022: SOX2 20726797 ChIP-Seq SW620 Human | SOX2 |
| FRMD6     | Enrichr CHEA_2022: SOX2 20726797 ChIP-Seq SW620 Human | SOX2 |
| CDC42EP5  | Enrichr CHEA_2022: SOX2 20726797 ChIP-Seq SW620 Human | SOX2 |
| CDC42EP4  | Enrichr CHEA_2022: SOX2 20726797 ChIP-Seq SW620 Human | SOX2 |
| BIRC5     | Enrichr CHEA_2022: SOX2 20726797 ChIP-Seq SW620 Human | SOX2 |
| FSCN1     | Enrichr CHEA_2022: SOX2 20726797 ChIP-Seq SW620 Human | SOX2 |
| CDC42EP2  | Enrichr CHEA_2022: SOX2 20726797 ChIP-Seq SW620 Human | SOX2 |
| ZNF655    | Enrichr CHEA_2022: SOX2 20726797 ChIP-Seq SW620 Human | SOX2 |
| ZNF654    | Enrichr CHEA_2022: SOX2 20726797 ChIP-Seq SW620 Human | SOX2 |
| LRRC57    | Enrichr CHEA_2022: SOX2 20726797 ChIP-Seq SW620 Human | SOX2 |
| PFKFB4    | Enrichr CHEA_2022: SOX2 20726797 ChIP-Seq SW620 Human | SOX2 |
| GPR87     | Enrichr CHEA_2022: SOX2 20726797 ChIP-Seq SW620 Human | SOX2 |
| TACSTD2   | Enrichr CHEA_2022: SOX2 20726797 ChIP-Seq SW620 Human | SOX2 |
| SAT2      | Enrichr CHEA_2022: SOX2 20726797 ChIP-Seq SW620 Human | SOX2 |
| HNMT      | Enrichr CHEA_2022: SOX2 20726797 ChIP-Seq SW620 Human | SOX2 |
| GLIS2     | Enrichr CHEA_2022: SOX2 20726797 ChIP-Seq SW620 Human | SOX2 |
| PORCN     | Enrichr CHEA_2022: SOX2 20726797 ChIP-Seq SW620 Human | SOX2 |
| SESN2     | Enrichr CHEA_2022: SOX2 20726797 ChIP-Seq SW620 Human | SOX2 |
| SESN3     | Enrichr CHEA_2022: SOX2 20726797 ChIP-Seq SW620 Human | SOX2 |
| LEPR      | Enrichr CHEA_2022: SOX2 20726797 ChIP-Seq SW620 Human | SOX2 |
| MBP       | Enrichr CHEA_2022: SOX2 20726797 ChIP-Seq SW620 Human | SOX2 |
| SLC38A5   | Enrichr CHEA_2022: SOX2 20726797 ChIP-Seq SW620 Human | SOX2 |
| DGCR2     | Enrichr CHEA_2022: SOX2 20726797 ChIP-Seq SW620 Human | SOX2 |
| CYB5B     | Enrichr CHEA_2022: SOX2 20726797 ChIP-Seq SW620 Human | SOX2 |
| SETDB2    | Enrichr CHEA_2022: SOX2 20726797 ChIP-Seq SW620 Human | SOX2 |
| MCC       | Enrichr CHEA_2022: SOX2 20726797 ChIP-Seq SW620 Human | SOX2 |
| CYB5A     | Enrichr CHEA_2022: SOX2 20726797 ChIP-Seq SW620 Human | SOX2 |
| QKI       | Enrichr CHEA_2022: SOX2 20726797 ChIP-Seq SW620 Human | SOX2 |
| UST       | Enrichr CHEA_2022: SOX2 20726797 ChIP-Seq SW620 Human | SOX2 |
| AAK1      | Enrichr CHEA_2022: SOX2 20726797 ChIP-Seq SW620 Human | SOX2 |
| SLC25A1   | Enrichr CHEA_2022: SOX2 20726797 ChIP-Seq SW620 Human | SOX2 |
| SLC25A4   | Enrichr CHEA_2022: SOX2 20726797 ChIP-Seq SW620 Human | SOX2 |
| RAP1GAP   | Enrichr CHEA_2022: SOX2 20726797 ChIP-Seq SW620 Human | SOX2 |
| PELP1     | Enrichr CHEA_2022: SOX2 20726797 ChIP-Seq SW620 Human | SOX2 |
| FCHO2     | Enrichr CHEA_2022: SOX2 20726797 ChIP-Seq SW620 Human | SOX2 |
| DSP       | Enrichr CHEA_2022: SOX2 20726797 ChIP-Seq SW620 Human | SOX2 |
| NDUFA8    | Enrichr CHEA_2022: SOX2 20726797 ChIP-Seq SW620 Human | SOX2 |
| SEC22A    | Enrichr CHEA_2022: SOX2 20726797 ChIP-Seq SW620 Human | SOX2 |
| DST       | Enrichr CHEA_2022: SOX2 20726797 ChIP-Seq SW620 Human | SOX2 |
| NDUFA3    | Enrichr CHEA_2022: SOX2 20726797 ChIP-Seq SW620 Human | SOX2 |
| LYSMD2    | Enrichr CHEA_2022: SOX2 20726797 ChIP-Seq SW620 Human | SOX2 |
| TPD52L1   | Enrichr CHEA_2022: SOX2 20726797 ChIP-Seq SW620 Human | SOX2 |
| PPM1A     | Enrichr CHEA_2022: SOX2 20726797 ChIP-Seq SW620 Human | SOX2 |
| ZNF618    | Enrichr CHEA_2022: SOX2 20726797 ChIP-Seq SW620 Human | SOX2 |
| MET       | Enrichr CHEA_2022: SOX2 20726797 ChIP-Seq SW620 Human | SOX2 |
| SEC22C    | Enrichr CHEA_2022: SOX2 20726797 ChIP-Seq SW620 Human | SOX2 |
| SLC25A14  | Enrichr CHEA_2022: SOX2 20726797 ChIP-Seq SW620 Human | SOX2 |

|           |                                                       |      |
|-----------|-------------------------------------------------------|------|
| EPHB6     | Enrichr CHEA_2022: SOX2 20726797 ChIP-Seq SW620 Human | SOX2 |
| FHL1      | Enrichr CHEA_2022: SOX2 20726797 ChIP-Seq SW620 Human | SOX2 |
| PIK3CD    | Enrichr CHEA_2022: SOX2 20726797 ChIP-Seq SW620 Human | SOX2 |
| PTPRZ1    | Enrichr CHEA_2022: SOX2 20726797 ChIP-Seq SW620 Human | SOX2 |
| SLITRK6   | Enrichr CHEA_2022: SOX2 20726797 ChIP-Seq SW620 Human | SOX2 |
| UPP1      | Enrichr CHEA_2022: SOX2 20726797 ChIP-Seq SW620 Human | SOX2 |
| EPHB2     | Enrichr CHEA_2022: SOX2 20726797 ChIP-Seq SW620 Human | SOX2 |
| EPHB4     | Enrichr CHEA_2022: SOX2 20726797 ChIP-Seq SW620 Human | SOX2 |
| ACVR1     | Enrichr CHEA_2022: SOX2 20726797 ChIP-Seq SW620 Human | SOX2 |
| ZFP1      | Enrichr CHEA_2022: SOX2 20726797 ChIP-Seq SW620 Human | SOX2 |
| SLC12A2   | Enrichr CHEA_2022: SOX2 20726797 ChIP-Seq SW620 Human | SOX2 |
| PLEKHA6   | Enrichr CHEA_2022: SOX2 20726797 ChIP-Seq SW620 Human | SOX2 |
| TM4SF4    | Enrichr CHEA_2022: SOX2 20726797 ChIP-Seq SW620 Human | SOX2 |
| EREG      | Enrichr CHEA_2022: SOX2 20726797 ChIP-Seq SW620 Human | SOX2 |
| PPP1R3D   | Enrichr CHEA_2022: SOX2 20726797 ChIP-Seq SW620 Human | SOX2 |
| IFI27     | Enrichr CHEA_2022: SOX2 20726797 ChIP-Seq SW620 Human | SOX2 |
| LACTB2    | Enrichr CHEA_2022: SOX2 20726797 ChIP-Seq SW620 Human | SOX2 |
| MXRA7     | Enrichr CHEA_2022: SOX2 20726797 ChIP-Seq SW620 Human | SOX2 |
| COL9A3    | Enrichr CHEA_2022: SOX2 20726797 ChIP-Seq SW620 Human | SOX2 |
| ALPK3     | Enrichr CHEA_2022: SOX2 20726797 ChIP-Seq SW620 Human | SOX2 |
| EPHA1     | Enrichr CHEA_2022: SOX2 20726797 ChIP-Seq SW620 Human | SOX2 |
| EPHA4     | Enrichr CHEA_2022: SOX2 20726797 ChIP-Seq SW620 Human | SOX2 |
| TMEM87A   | Enrichr CHEA_2022: SOX2 20726797 ChIP-Seq SW620 Human | SOX2 |
| SATB1     | Enrichr CHEA_2022: SOX2 20726797 ChIP-Seq SW620 Human | SOX2 |
| KDELR2    | Enrichr CHEA_2022: SOX2 20726797 ChIP-Seq SW620 Human | SOX2 |
| PEX11A    | Enrichr CHEA_2022: SOX2 20726797 ChIP-Seq SW620 Human | SOX2 |
| PEX11B    | Enrichr CHEA_2022: SOX2 20726797 ChIP-Seq SW620 Human | SOX2 |
| LRP4      | Enrichr CHEA_2022: SOX2 20726797 ChIP-Seq SW620 Human | SOX2 |
| PRCP      | Enrichr CHEA_2022: SOX2 20726797 ChIP-Seq SW620 Human | SOX2 |
| CYB5D1    | Enrichr CHEA_2022: SOX2 20726797 ChIP-Seq SW620 Human | SOX2 |
| UBE2L6    | Enrichr CHEA_2022: SOX2 20726797 ChIP-Seq SW620 Human | SOX2 |
| LRP8      | Enrichr CHEA_2022: SOX2 20726797 ChIP-Seq SW620 Human | SOX2 |
| NTN4      | Enrichr CHEA_2022: SOX2 20726797 ChIP-Seq SW620 Human | SOX2 |
| CYB5D2    | Enrichr CHEA_2022: SOX2 20726797 ChIP-Seq SW620 Human | SOX2 |
| BAIAP2L1  | Enrichr CHEA_2022: SOX2 20726797 ChIP-Seq SW620 Human | SOX2 |
| RAB11FIP1 | Enrichr CHEA_2022: SOX2 20726797 ChIP-Seq SW620 Human | SOX2 |
| EXOSC6    | Enrichr CHEA_2022: SOX2 20726797 ChIP-Seq SW620 Human | SOX2 |
| PARD6B    | Enrichr CHEA_2022: SOX2 20726797 ChIP-Seq SW620 Human | SOX2 |
| BAIAP2L2  | Enrichr CHEA_2022: SOX2 20726797 ChIP-Seq SW620 Human | SOX2 |
| CHORDC1   | Enrichr CHEA_2022: SOX2 20726797 ChIP-Seq SW620 Human | SOX2 |
| TGOLN2    | Enrichr CHEA_2022: SOX2 20726797 ChIP-Seq SW620 Human | SOX2 |
| POF1B     | Enrichr CHEA_2022: SOX2 20726797 ChIP-Seq SW620 Human | SOX2 |
| RAB11FIP4 | Enrichr CHEA_2022: SOX2 20726797 ChIP-Seq SW620 Human | SOX2 |
| WWTR1     | Enrichr CHEA_2022: SOX2 20726797 ChIP-Seq SW620 Human | SOX2 |
| PAQR5     | Enrichr CHEA_2022: SOX2 20726797 ChIP-Seq SW620 Human | SOX2 |
| FOXF2     | Enrichr CHEA_2022: SOX2 20726797 ChIP-Seq SW620 Human | SOX2 |
| ST6GAL1   | Enrichr CHEA_2022: SOX2 20726797 ChIP-Seq SW620 Human | SOX2 |
| PAQR3     | Enrichr CHEA_2022: SOX2 20726797 ChIP-Seq SW620 Human | SOX2 |
| PLA2G4A   | Enrichr CHEA_2022: SOX2 20726797 ChIP-Seq SW620 Human | SOX2 |
| HSPA12A   | Enrichr CHEA_2022: SOX2 20726797 ChIP-Seq SW620 Human | SOX2 |
| IFI44     | Enrichr CHEA_2022: SOX2 20726797 ChIP-Seq SW620 Human | SOX2 |
| PIK3R1    | Enrichr CHEA_2022: SOX2 20726797 ChIP-Seq SW620 Human | SOX2 |
| TAGLN2    | Enrichr CHEA_2022: SOX2 20726797 ChIP-Seq SW620 Human | SOX2 |
| RGL2      | Enrichr CHEA_2022: SOX2 20726797 ChIP-Seq SW620 Human | SOX2 |
| RGL1      | Enrichr CHEA_2022: SOX2 20726797 ChIP-Seq SW620 Human | SOX2 |
| SPON2     | Enrichr CHEA_2022: SOX2 20726797 ChIP-Seq SW620 Human | SOX2 |
| IFI35     | Enrichr CHEA_2022: SOX2 20726797 ChIP-Seq SW620 Human | SOX2 |
| PRF1      | Enrichr CHEA_2022: SOX2 20726797 ChIP-Seq SW620 Human | SOX2 |
| BRCC3     | Enrichr CHEA_2022: SOX2 20726797 ChIP-Seq SW620 Human | SOX2 |

|           |                                                       |      |
|-----------|-------------------------------------------------------|------|
| PELO      | Enrichr CHEA_2022: SOX2 20726797 ChIP-Seq SW620 Human | SOX2 |
| RASSF3    | Enrichr CHEA_2022: SOX2 20726797 ChIP-Seq SW620 Human | SOX2 |
| RASSF5    | Enrichr CHEA_2022: SOX2 20726797 ChIP-Seq SW620 Human | SOX2 |
| RASSF6    | Enrichr CHEA_2022: SOX2 20726797 ChIP-Seq SW620 Human | SOX2 |
| MICAL2    | Enrichr CHEA_2022: SOX2 20726797 ChIP-Seq SW620 Human | SOX2 |
| TSPAN8    | Enrichr CHEA_2022: SOX2 20726797 ChIP-Seq SW620 Human | SOX2 |
| ANKH      | Enrichr CHEA_2022: SOX2 20726797 ChIP-Seq SW620 Human | SOX2 |
| ARSJ      | Enrichr CHEA_2022: SOX2 20726797 ChIP-Seq SW620 Human | SOX2 |
| TSPAN6    | Enrichr CHEA_2022: SOX2 20726797 ChIP-Seq SW620 Human | SOX2 |
| ZBED2     | Enrichr CHEA_2022: SOX2 20726797 ChIP-Seq SW620 Human | SOX2 |
| KIF21B    | Enrichr CHEA_2022: SOX2 20726797 ChIP-Seq SW620 Human | SOX2 |
| TSPAN3    | Enrichr CHEA_2022: SOX2 20726797 ChIP-Seq SW620 Human | SOX2 |
| CD14      | Enrichr CHEA_2022: SOX2 20726797 ChIP-Seq SW620 Human | SOX2 |
| TSPAN1    | Enrichr CHEA_2022: SOX2 20726797 ChIP-Seq SW620 Human | SOX2 |
| ACAD11    | Enrichr CHEA_2022: SOX2 20726797 ChIP-Seq SW620 Human | SOX2 |
| PGBD1     | Enrichr CHEA_2022: SOX2 20726797 ChIP-Seq SW620 Human | SOX2 |
| ARSD      | Enrichr CHEA_2022: SOX2 20726797 ChIP-Seq SW620 Human | SOX2 |
| CTSB      | Enrichr CHEA_2022: SOX2 20726797 ChIP-Seq SW620 Human | SOX2 |
| NBPF3     | Enrichr CHEA_2022: SOX2 20726797 ChIP-Seq SW620 Human | SOX2 |
| FOXD1     | Enrichr CHEA_2022: SOX2 20726797 ChIP-Seq SW620 Human | SOX2 |
| TNFRSF12A | Enrichr CHEA_2022: SOX2 20726797 ChIP-Seq SW620 Human | SOX2 |
| MMEL1     | Enrichr CHEA_2022: SOX2 20726797 ChIP-Seq SW620 Human | SOX2 |
| KLK10     | Enrichr CHEA_2022: SOX2 20726797 ChIP-Seq SW620 Human | SOX2 |
| KLK11     | Enrichr CHEA_2022: SOX2 20726797 ChIP-Seq SW620 Human | SOX2 |
| RGMA      | Enrichr CHEA_2022: SOX2 20726797 ChIP-Seq SW620 Human | SOX2 |
| ENAH      | Enrichr CHEA_2022: SOX2 20726797 ChIP-Seq SW620 Human | SOX2 |
| NR5A2     | Enrichr CHEA_2022: SOX2 20726797 ChIP-Seq SW620 Human | SOX2 |
| PTPRF     | Enrichr CHEA_2022: SOX2 20726797 ChIP-Seq SW620 Human | SOX2 |
| SERGEF    | Enrichr CHEA_2022: SOX2 20726797 ChIP-Seq SW620 Human | SOX2 |
| TH        | Enrichr CHEA_2022: SOX2 20726797 ChIP-Seq SW620 Human | SOX2 |
| PTPRB     | Enrichr CHEA_2022: SOX2 20726797 ChIP-Seq SW620 Human | SOX2 |
| VSNL1     | Enrichr CHEA_2022: SOX2 20726797 ChIP-Seq SW620 Human | SOX2 |
| ID2       | Enrichr CHEA_2022: SOX2 20726797 ChIP-Seq SW620 Human | SOX2 |
| MKX       | Enrichr CHEA_2022: SOX2 20726797 ChIP-Seq SW620 Human | SOX2 |
| CD24      | Enrichr CHEA_2022: SOX2 20726797 ChIP-Seq SW620 Human | SOX2 |
| FOXC1     | Enrichr CHEA_2022: SOX2 20726797 ChIP-Seq SW620 Human | SOX2 |
| CETN2     | Enrichr CHEA_2022: SOX2 20726797 ChIP-Seq SW620 Human | SOX2 |
| PTPRO     | Enrichr CHEA_2022: SOX2 20726797 ChIP-Seq SW620 Human | SOX2 |
| INTS10    | Enrichr CHEA_2022: SOX2 20726797 ChIP-Seq SW620 Human | SOX2 |
| TMPRSS4   | Enrichr CHEA_2022: SOX2 20726797 ChIP-Seq SW620 Human | SOX2 |
| CTSZ      | Enrichr CHEA_2022: SOX2 20726797 ChIP-Seq SW620 Human | SOX2 |
| KIF15     | Enrichr CHEA_2022: SOX2 20726797 ChIP-Seq SW620 Human | SOX2 |
| KIF14     | Enrichr CHEA_2022: SOX2 20726797 ChIP-Seq SW620 Human | SOX2 |
| HNF4G     | Enrichr CHEA_2022: SOX2 20726797 ChIP-Seq SW620 Human | SOX2 |
| TMPRSS3   | Enrichr CHEA_2022: SOX2 20726797 ChIP-Seq SW620 Human | SOX2 |
| PCSK9     | Enrichr CHEA_2022: SOX2 20726797 ChIP-Seq SW620 Human | SOX2 |
| NEDD9     | Enrichr CHEA_2022: SOX2 20726797 ChIP-Seq SW620 Human | SOX2 |
| PCSK6     | Enrichr CHEA_2022: SOX2 20726797 ChIP-Seq SW620 Human | SOX2 |
| CTSS      | Enrichr CHEA_2022: SOX2 20726797 ChIP-Seq SW620 Human | SOX2 |
| PTPRH     | Enrichr CHEA_2022: SOX2 20726797 ChIP-Seq SW620 Human | SOX2 |
| ACACA     | Enrichr CHEA_2022: SOX2 20726797 ChIP-Seq SW620 Human | SOX2 |
| SNX5      | Enrichr CHEA_2022: SOX2 20726797 ChIP-Seq SW620 Human | SOX2 |
| SOCS2     | Enrichr CHEA_2022: SOX2 20726797 ChIP-Seq SW620 Human | SOX2 |
| SNX1      | Enrichr CHEA_2022: SOX2 20726797 ChIP-Seq SW620 Human | SOX2 |
| IDS       | Enrichr CHEA_2022: SOX2 20726797 ChIP-Seq SW620 Human | SOX2 |
| CTSL      | Enrichr CHEA_2022: SOX2 20726797 ChIP-Seq SW620 Human | SOX2 |
| STK39     | Enrichr CHEA_2022: SOX2 20726797 ChIP-Seq SW620 Human | SOX2 |
| CTSH      | Enrichr CHEA_2022: SOX2 20726797 ChIP-Seq SW620 Human | SOX2 |
| LMCD1     | Enrichr CHEA_2022: SOX2 20726797 ChIP-Seq SW620 Human | SOX2 |

|          |                                                       |      |
|----------|-------------------------------------------------------|------|
| SNX9     | Enrichr CHEA_2022: SOX2 20726797 ChIP-Seq SW620 Human | SOX2 |
| CTSD     | Enrichr CHEA_2022: SOX2 20726797 ChIP-Seq SW620 Human | SOX2 |
| SOCS5    | Enrichr CHEA_2022: SOX2 20726797 ChIP-Seq SW620 Human | SOX2 |
| SOCS6    | Enrichr CHEA_2022: SOX2 20726797 ChIP-Seq SW620 Human | SOX2 |
| MMD      | Enrichr CHEA_2022: SOX2 20726797 ChIP-Seq SW620 Human | SOX2 |
| BCAP31   | Enrichr CHEA_2022: SOX2 20726797 ChIP-Seq SW620 Human | SOX2 |
| MME      | Enrichr CHEA_2022: SOX2 20726797 ChIP-Seq SW620 Human | SOX2 |
| AP2B1    | Enrichr CHEA_2022: SOX2 20726797 ChIP-Seq SW620 Human | SOX2 |
| UBE2E2   | Enrichr CHEA_2022: SOX2 20726797 ChIP-Seq SW620 Human | SOX2 |
| MIB1     | Enrichr CHEA_2022: SOX2 20726797 ChIP-Seq SW620 Human | SOX2 |
| FKBP1B   | Enrichr CHEA_2022: SOX2 20726797 ChIP-Seq SW620 Human | SOX2 |
| NEDD1    | Enrichr CHEA_2022: SOX2 20726797 ChIP-Seq SW620 Human | SOX2 |
| STK17B   | Enrichr CHEA_2022: SOX2 20726797 ChIP-Seq SW620 Human | SOX2 |
| CCNE2    | Enrichr CHEA_2022: SOX2 20726797 ChIP-Seq SW620 Human | SOX2 |
| CCNE1    | Enrichr CHEA_2022: SOX2 20726797 ChIP-Seq SW620 Human | SOX2 |
| EPPK1    | Enrichr CHEA_2022: SOX2 20726797 ChIP-Seq SW620 Human | SOX2 |
| IL17D    | Enrichr CHEA_2022: SOX2 20726797 ChIP-Seq SW620 Human | SOX2 |
| CD44     | Enrichr CHEA_2022: SOX2 20726797 ChIP-Seq SW620 Human | SOX2 |
| NPDC1    | Enrichr CHEA_2022: SOX2 20726797 ChIP-Seq SW620 Human | SOX2 |
| DBN1     | Enrichr CHEA_2022: SOX2 20726797 ChIP-Seq SW620 Human | SOX2 |
| FOXA2    | Enrichr CHEA_2022: SOX2 20726797 ChIP-Seq SW620 Human | SOX2 |
| ERRF1    | Enrichr CHEA_2022: SOX2 20726797 ChIP-Seq SW620 Human | SOX2 |
| FOXA1    | Enrichr CHEA_2022: SOX2 20726797 ChIP-Seq SW620 Human | SOX2 |
| FKBP11   | Enrichr CHEA_2022: SOX2 20726797 ChIP-Seq SW620 Human | SOX2 |
| SLC43A3  | Enrichr CHEA_2022: SOX2 20726797 ChIP-Seq SW620 Human | SOX2 |
| SLC43A1  | Enrichr CHEA_2022: SOX2 20726797 ChIP-Seq SW620 Human | SOX2 |
| FKBP14   | Enrichr CHEA_2022: SOX2 20726797 ChIP-Seq SW620 Human | SOX2 |
| AKR1B1   | Enrichr CHEA_2022: SOX2 20726797 ChIP-Seq SW620 Human | SOX2 |
| FHOD3    | Enrichr CHEA_2022: SOX2 20726797 ChIP-Seq SW620 Human | SOX2 |
| WASL     | Enrichr CHEA_2022: SOX2 20726797 ChIP-Seq SW620 Human | SOX2 |
| DERL1    | Enrichr CHEA_2022: SOX2 20726797 ChIP-Seq SW620 Human | SOX2 |
| ZDHHC2   | Enrichr CHEA_2022: SOX2 20726797 ChIP-Seq SW620 Human | SOX2 |
| CRIP1    | Enrichr CHEA_2022: SOX2 20726797 ChIP-Seq SW620 Human | SOX2 |
| CRIP2    | Enrichr CHEA_2022: SOX2 20726797 ChIP-Seq SW620 Human | SOX2 |
| SCML1    | Enrichr CHEA_2022: SOX2 20726797 ChIP-Seq SW620 Human | SOX2 |
| PGRMC2   | Enrichr CHEA_2022: SOX2 20726797 ChIP-Seq SW620 Human | SOX2 |
| SPTLC2   | Enrichr CHEA_2022: SOX2 20726797 ChIP-Seq SW620 Human | SOX2 |
| CAMK2N1  | Enrichr CHEA_2022: SOX2 20726797 ChIP-Seq SW620 Human | SOX2 |
| SERTAD2  | Enrichr CHEA_2022: SOX2 20726797 ChIP-Seq SW620 Human | SOX2 |
| SERTAD3  | Enrichr CHEA_2022: SOX2 20726797 ChIP-Seq SW620 Human | SOX2 |
| ENC1     | Enrichr CHEA_2022: SOX2 20726797 ChIP-Seq SW620 Human | SOX2 |
| SERTAD1  | Enrichr CHEA_2022: SOX2 20726797 ChIP-Seq SW620 Human | SOX2 |
| CD59     | Enrichr CHEA_2022: SOX2 20726797 ChIP-Seq SW620 Human | SOX2 |
| CD55     | Enrichr CHEA_2022: SOX2 20726797 ChIP-Seq SW620 Human | SOX2 |
| NPNT     | Enrichr CHEA_2022: SOX2 20726797 ChIP-Seq SW620 Human | SOX2 |
| G6PD     | Enrichr CHEA_2022: SOX2 20726797 ChIP-Seq SW620 Human | SOX2 |
| CRIM1    | Enrichr CHEA_2022: SOX2 20726797 ChIP-Seq SW620 Human | SOX2 |
| MID1     | Enrichr CHEA_2022: SOX2 20726797 ChIP-Seq SW620 Human | SOX2 |
| TANC2    | Enrichr CHEA_2022: SOX2 20726797 ChIP-Seq SW620 Human | SOX2 |
| XK       | Enrichr CHEA_2022: SOX2 20726797 ChIP-Seq SW620 Human | SOX2 |
| IVNS1ABP | Enrichr CHEA_2022: SOX2 20726797 ChIP-Seq SW620 Human | SOX2 |
| CD82     | Enrichr CHEA_2022: SOX2 20726797 ChIP-Seq SW620 Human | SOX2 |
| SLC1A1   | Enrichr CHEA_2022: SOX2 20726797 ChIP-Seq SW620 Human | SOX2 |
| AURKB    | Enrichr CHEA_2022: SOX2 20726797 ChIP-Seq SW620 Human | SOX2 |
| RXRA     | Enrichr CHEA_2022: SOX2 20726797 ChIP-Seq SW620 Human | SOX2 |
| RAB40B   | Enrichr CHEA_2022: SOX2 20726797 ChIP-Seq SW620 Human | SOX2 |
| SH3TC2   | Enrichr CHEA_2022: SOX2 20726797 ChIP-Seq SW620 Human | SOX2 |
| HSF2     | Enrichr CHEA_2022: SOX2 20726797 ChIP-Seq SW620 Human | SOX2 |
| NPHP3    | Enrichr CHEA_2022: SOX2 20726797 ChIP-Seq SW620 Human | SOX2 |

|          |                                                       |      |
|----------|-------------------------------------------------------|------|
| CCRL2    | Enrichr CHEA_2022: SOX2 20726797 ChIP-Seq SW620 Human | SOX2 |
| GPC4     | Enrichr CHEA_2022: SOX2 20726797 ChIP-Seq SW620 Human | SOX2 |
| PAK6     | Enrichr CHEA_2022: SOX2 20726797 ChIP-Seq SW620 Human | SOX2 |
| MICB     | Enrichr CHEA_2022: SOX2 20726797 ChIP-Seq SW620 Human | SOX2 |
| SLC30A7  | Enrichr CHEA_2022: SOX2 20726797 ChIP-Seq SW620 Human | SOX2 |
| INHBB    | Enrichr CHEA_2022: SOX2 20726797 ChIP-Seq SW620 Human | SOX2 |
| ISG15    | Enrichr CHEA_2022: SOX2 20726797 ChIP-Seq SW620 Human | SOX2 |
| SSH3     | Enrichr CHEA_2022: SOX2 20726797 ChIP-Seq SW620 Human | SOX2 |
| PAN3     | Enrichr CHEA_2022: SOX2 20726797 ChIP-Seq SW620 Human | SOX2 |
| QDPR     | Enrichr CHEA_2022: SOX2 20726797 ChIP-Seq SW620 Human | SOX2 |
| PROCR    | Enrichr CHEA_2022: SOX2 20726797 ChIP-Seq SW620 Human | SOX2 |
| GEMIN7   | Enrichr CHEA_2022: SOX2 20726797 ChIP-Seq SW620 Human | SOX2 |
| TAB3     | Enrichr CHEA_2022: SOX2 20726797 ChIP-Seq SW620 Human | SOX2 |
| GCLM     | Enrichr CHEA_2022: SOX2 20726797 ChIP-Seq SW620 Human | SOX2 |
| BLVRB    | Enrichr CHEA_2022: SOX2 20726797 ChIP-Seq SW620 Human | SOX2 |
| ARHGEF10 | Enrichr CHEA_2022: SOX2 20726797 ChIP-Seq SW620 Human | SOX2 |
| LRRFIP1  | Enrichr CHEA_2022: SOX2 20726797 ChIP-Seq SW620 Human | SOX2 |
| KLHL15   | Enrichr CHEA_2022: SOX2 20726797 ChIP-Seq SW620 Human | SOX2 |
| WWC1     | Enrichr CHEA_2022: SOX2 20726797 ChIP-Seq SW620 Human | SOX2 |
| WWC2     | Enrichr CHEA_2022: SOX2 20726797 ChIP-Seq SW620 Human | SOX2 |
| RGS3     | Enrichr CHEA_2022: SOX2 20726797 ChIP-Seq SW620 Human | SOX2 |
| CALD1    | Enrichr CHEA_2022: SOX2 20726797 ChIP-Seq SW620 Human | SOX2 |
| RGS2     | Enrichr CHEA_2022: SOX2 20726797 ChIP-Seq SW620 Human | SOX2 |
| NDEL1    | Enrichr CHEA_2022: SOX2 20726797 ChIP-Seq SW620 Human | SOX2 |
| CD99     | Enrichr CHEA_2022: SOX2 20726797 ChIP-Seq SW620 Human | SOX2 |
| MMP7     | Enrichr CHEA_2022: SOX2 20726797 ChIP-Seq SW620 Human | SOX2 |
| GALNT6   | Enrichr CHEA_2022: SOX2 20726797 ChIP-Seq SW620 Human | SOX2 |
| GALNT5   | Enrichr CHEA_2022: SOX2 20726797 ChIP-Seq SW620 Human | SOX2 |
| GALNT4   | Enrichr CHEA_2022: SOX2 20726797 ChIP-Seq SW620 Human | SOX2 |
| GALNT3   | Enrichr CHEA_2022: SOX2 20726797 ChIP-Seq SW620 Human | SOX2 |
| HMGA2    | Enrichr CHEA_2022: SOX2 20726797 ChIP-Seq SW620 Human | SOX2 |
| GULP1    | Enrichr CHEA_2022: SOX2 20726797 ChIP-Seq SW620 Human | SOX2 |
| BMP7     | Enrichr CHEA_2022: SOX2 20726797 ChIP-Seq SW620 Human | SOX2 |
| BMP5     | Enrichr CHEA_2022: SOX2 20726797 ChIP-Seq SW620 Human | SOX2 |
| IRF1     | Enrichr CHEA_2022: SOX2 20726797 ChIP-Seq SW620 Human | SOX2 |
| BMP4     | Enrichr CHEA_2022: SOX2 20726797 ChIP-Seq SW620 Human | SOX2 |
| BMP2     | Enrichr CHEA_2022: SOX2 20726797 ChIP-Seq SW620 Human | SOX2 |
| MMRN2    | Enrichr CHEA_2022: SOX2 20726797 ChIP-Seq SW620 Human | SOX2 |
| RBM20    | Enrichr CHEA_2022: SOX2 20726797 ChIP-Seq SW620 Human | SOX2 |
| IRF6     | Enrichr CHEA_2022: SOX2 20726797 ChIP-Seq SW620 Human | SOX2 |
| IRF7     | Enrichr CHEA_2022: SOX2 20726797 ChIP-Seq SW620 Human | SOX2 |
| TMEM45A  | Enrichr CHEA_2022: SOX2 20726797 ChIP-Seq SW620 Human | SOX2 |
| TMEM45B  | Enrichr CHEA_2022: SOX2 20726797 ChIP-Seq SW620 Human | SOX2 |
| PSMD11   | Enrichr CHEA_2022: SOX2 20726797 ChIP-Seq SW620 Human | SOX2 |
| RTN3     | Enrichr CHEA_2022: SOX2 20726797 ChIP-Seq SW620 Human | SOX2 |
| CHD2     | Enrichr CHEA_2022: SOX2 20726797 ChIP-Seq SW620 Human | SOX2 |
| FUT2     | Enrichr CHEA_2022: SOX2 20726797 ChIP-Seq SW620 Human | SOX2 |
| AFF1     | Enrichr CHEA_2022: SOX2 20726797 ChIP-Seq SW620 Human | SOX2 |
| PDLIM1   | Enrichr CHEA_2022: SOX2 20726797 ChIP-Seq SW620 Human | SOX2 |
| CALB1    | Enrichr CHEA_2022: SOX2 20726797 ChIP-Seq SW620 Human | SOX2 |
| PDLIM4   | Enrichr CHEA_2022: SOX2 20726797 ChIP-Seq SW620 Human | SOX2 |
| MARVELD1 | Enrichr CHEA_2022: SOX2 20726797 ChIP-Seq SW620 Human | SOX2 |
| CALB2    | Enrichr CHEA_2022: SOX2 20726797 ChIP-Seq SW620 Human | SOX2 |
| FUT8     | Enrichr CHEA_2022: SOX2 20726797 ChIP-Seq SW620 Human | SOX2 |
| ISOC2    | Enrichr CHEA_2022: SOX2 20726797 ChIP-Seq SW620 Human | SOX2 |
| PDLIM5   | Enrichr CHEA_2022: SOX2 20726797 ChIP-Seq SW620 Human | SOX2 |
| WNT3     | Enrichr CHEA_2022: SOX2 20726797 ChIP-Seq SW620 Human | SOX2 |
| DDX17    | Enrichr CHEA_2022: SOX2 20726797 ChIP-Seq SW620 Human | SOX2 |
| TBC1D9   | Enrichr CHEA_2022: SOX2 20726797 ChIP-Seq SW620 Human | SOX2 |

|          |                                                       |      |
|----------|-------------------------------------------------------|------|
| ATP2B4   | Enrichr CHEA_2022: SOX2 20726797 ChIP-Seq SW620 Human | SOX2 |
| FNDC3A   | Enrichr CHEA_2022: SOX2 20726797 ChIP-Seq SW620 Human | SOX2 |
| FNDC3B   | Enrichr CHEA_2022: SOX2 20726797 ChIP-Seq SW620 Human | SOX2 |
| ATP2B1   | Enrichr CHEA_2022: SOX2 20726797 ChIP-Seq SW620 Human | SOX2 |
| TBC1D1   | Enrichr CHEA_2022: SOX2 20726797 ChIP-Seq SW620 Human | SOX2 |
| TBC1D2   | Enrichr CHEA_2022: SOX2 20726797 ChIP-Seq SW620 Human | SOX2 |
| PTHLH    | Enrichr CHEA_2022: SOX2 20726797 ChIP-Seq SW620 Human | SOX2 |
| SBK1     | Enrichr CHEA_2022: SOX2 20726797 ChIP-Seq SW620 Human | SOX2 |
| TBC1D4   | Enrichr CHEA_2022: SOX2 20726797 ChIP-Seq SW620 Human | SOX2 |
| TBC1D5   | Enrichr CHEA_2022: SOX2 20726797 ChIP-Seq SW620 Human | SOX2 |
| LNX2     | Enrichr CHEA_2022: SOX2 20726797 ChIP-Seq SW620 Human | SOX2 |
| FAM50A   | Enrichr CHEA_2022: SOX2 20726797 ChIP-Seq SW620 Human | SOX2 |
| LNX1     | Enrichr CHEA_2022: SOX2 20726797 ChIP-Seq SW620 Human | SOX2 |
| S100P    | Enrichr CHEA_2022: SOX2 20726797 ChIP-Seq SW620 Human | SOX2 |
| CHURC1   | Enrichr CHEA_2022: SOX2 20726797 ChIP-Seq SW620 Human | SOX2 |
| ZP3      | Enrichr CHEA_2022: SOX2 20726797 ChIP-Seq SW620 Human | SOX2 |
| CLUAP1   | Enrichr CHEA_2022: SOX2 20726797 ChIP-Seq SW620 Human | SOX2 |
| SCARB2   | Enrichr CHEA_2022: SOX2 20726797 ChIP-Seq SW620 Human | SOX2 |
| DCTN6    | Enrichr CHEA_2022: SOX2 20726797 ChIP-Seq SW620 Human | SOX2 |
| DDX28    | Enrichr CHEA_2022: SOX2 20726797 ChIP-Seq SW620 Human | SOX2 |
| LAMA3    | Enrichr CHEA_2022: SOX2 20726797 ChIP-Seq SW620 Human | SOX2 |
| MVP      | Enrichr CHEA_2022: SOX2 20726797 ChIP-Seq SW620 Human | SOX2 |
| ZNF292   | Enrichr CHEA_2022: SOX2 20726797 ChIP-Seq SW620 Human | SOX2 |
| CRMP1    | Enrichr CHEA_2022: SOX2 20726797 ChIP-Seq SW620 Human | SOX2 |
| ATP2A3   | Enrichr CHEA_2022: SOX2 20726797 ChIP-Seq SW620 Human | SOX2 |
| ATP2A2   | Enrichr CHEA_2022: SOX2 20726797 ChIP-Seq SW620 Human | SOX2 |
| RPGR     | Enrichr CHEA_2022: SOX2 20726797 ChIP-Seq SW620 Human | SOX2 |
| CLN6     | Enrichr CHEA_2022: SOX2 20726797 ChIP-Seq SW620 Human | SOX2 |
| CLMN     | Enrichr CHEA_2022: SOX2 20726797 ChIP-Seq SW620 Human | SOX2 |
| EPS8L1   | Enrichr CHEA_2022: SOX2 20726797 ChIP-Seq SW620 Human | SOX2 |
| SCN5A    | Enrichr CHEA_2022: SOX2 20726797 ChIP-Seq SW620 Human | SOX2 |
| EPS8L2   | Enrichr CHEA_2022: SOX2 20726797 ChIP-Seq SW620 Human | SOX2 |
| NPTN     | Enrichr CHEA_2022: SOX2 20726797 ChIP-Seq SW620 Human | SOX2 |
| ACOT9    | Enrichr CHEA_2022: SOX2 20726797 ChIP-Seq SW620 Human | SOX2 |
| MX1      | Enrichr CHEA_2022: SOX2 20726797 ChIP-Seq SW620 Human | SOX2 |
| GLCE     | Enrichr CHEA_2022: SOX2 20726797 ChIP-Seq SW620 Human | SOX2 |
| RPL23    | Enrichr CHEA_2022: SOX2 20726797 ChIP-Seq SW620 Human | SOX2 |
| SYTL2    | Enrichr CHEA_2022: SOX2 20726797 ChIP-Seq SW620 Human | SOX2 |
| UPF3B    | Enrichr CHEA_2022: SOX2 20726797 ChIP-Seq SW620 Human | SOX2 |
| CHFR     | Enrichr CHEA_2022: SOX2 20726797 ChIP-Seq SW620 Human | SOX2 |
| DYNC1L11 | Enrichr CHEA_2022: SOX2 20726797 ChIP-Seq SW620 Human | SOX2 |
| GALNS    | Enrichr CHEA_2022: SOX2 20726797 ChIP-Seq SW620 Human | SOX2 |
| CPEB2    | Enrichr CHEA_2022: SOX2 20726797 ChIP-Seq SW620 Human | SOX2 |
| GPR160   | Enrichr CHEA_2022: SOX2 20726797 ChIP-Seq SW620 Human | SOX2 |
| ASB9     | Enrichr CHEA_2022: SOX2 20726797 ChIP-Seq SW620 Human | SOX2 |
| TRIP6    | Enrichr CHEA_2022: SOX2 20726797 ChIP-Seq SW620 Human | SOX2 |
| VIM      | Enrichr CHEA_2022: SOX2 20726797 ChIP-Seq SW620 Human | SOX2 |
| HSPA1A   | Enrichr CHEA_2022: SOX2 20726797 ChIP-Seq SW620 Human | SOX2 |
| ASF1A    | Enrichr CHEA_2022: SOX2 20726797 ChIP-Seq SW620 Human | SOX2 |
| ACOT2    | Enrichr CHEA_2022: SOX2 20726797 ChIP-Seq SW620 Human | SOX2 |
| ASB4     | Enrichr CHEA_2022: SOX2 20726797 ChIP-Seq SW620 Human | SOX2 |
| CPVL     | Enrichr CHEA_2022: SOX2 20726797 ChIP-Seq SW620 Human | SOX2 |
| HSPA1B   | Enrichr CHEA_2022: SOX2 20726797 ChIP-Seq SW620 Human | SOX2 |
| PARG     | Enrichr CHEA_2022: SOX2 20726797 ChIP-Seq SW620 Human | SOX2 |
| SF3B3    | Enrichr CHEA_2022: SOX2 20726797 ChIP-Seq SW620 Human | SOX2 |
| EHF      | Enrichr CHEA_2022: SOX2 20726797 ChIP-Seq SW620 Human | SOX2 |
| MAML3    | Enrichr CHEA_2022: SOX2 20726797 ChIP-Seq SW620 Human | SOX2 |
| AHNAK    | Enrichr CHEA_2022: SOX2 20726797 ChIP-Seq SW620 Human | SOX2 |
| SERPINE1 | Enrichr CHEA_2022: SOX2 20726797 ChIP-Seq SW620 Human | SOX2 |

|          |                                                       |      |
|----------|-------------------------------------------------------|------|
| THYN1    | Enrichr CHEA_2022: SOX2 20726797 ChIP-Seq SW620 Human | SOX2 |
| ASAH1    | Enrichr CHEA_2022: SOX2 20726797 ChIP-Seq SW620 Human | SOX2 |
| PCMT1    | Enrichr CHEA_2022: SOX2 20726797 ChIP-Seq SW620 Human | SOX2 |
| CREB3L1  | Enrichr CHEA_2022: SOX2 20726797 ChIP-Seq SW620 Human | SOX2 |
| MYB      | Enrichr CHEA_2022: SOX2 20726797 ChIP-Seq SW620 Human | SOX2 |
| CHST13   | Enrichr CHEA_2022: SOX2 20726797 ChIP-Seq SW620 Human | SOX2 |
| CHST11   | Enrichr CHEA_2022: SOX2 20726797 ChIP-Seq SW620 Human | SOX2 |
| S100A14  | Enrichr CHEA_2022: SOX2 20726797 ChIP-Seq SW620 Human | SOX2 |
| SERPINF1 | Enrichr CHEA_2022: SOX2 20726797 ChIP-Seq SW620 Human | SOX2 |
| HOXA2    | Enrichr CHEA_2022: SOX2 20726797 ChIP-Seq SW620 Human | SOX2 |
| CYP1B1   | Enrichr CHEA_2022: SOX2 20726797 ChIP-Seq SW620 Human | SOX2 |
| HOXA7    | Enrichr CHEA_2022: SOX2 20726797 ChIP-Seq SW620 Human | SOX2 |
| HOXA5    | Enrichr CHEA_2022: SOX2 20726797 ChIP-Seq SW620 Human | SOX2 |
| F8A1     | Enrichr CHEA_2022: SOX2 20726797 ChIP-Seq SW620 Human | SOX2 |
| WNT10A   | Enrichr CHEA_2022: SOX2 20726797 ChIP-Seq SW620 Human | SOX2 |
| FZD3     | Enrichr CHEA_2022: SOX2 20726797 ChIP-Seq SW620 Human | SOX2 |
| FZD6     | Enrichr CHEA_2022: SOX2 20726797 ChIP-Seq SW620 Human | SOX2 |
| ST14     | Enrichr CHEA_2022: SOX2 20726797 ChIP-Seq SW620 Human | SOX2 |
| RAB3IP   | Enrichr CHEA_2022: SOX2 20726797 ChIP-Seq SW620 Human | SOX2 |
| FZD7     | Enrichr CHEA_2022: SOX2 20726797 ChIP-Seq SW620 Human | SOX2 |
| SLC16A10 | Enrichr CHEA_2022: SOX2 20726797 ChIP-Seq SW620 Human | SOX2 |
| GPR137B  | Enrichr CHEA_2022: SOX2 20726797 ChIP-Seq SW620 Human | SOX2 |
| SULT2B1  | Enrichr CHEA_2022: SOX2 20726797 ChIP-Seq SW620 Human | SOX2 |
| SLC6A8   | Enrichr CHEA_2022: SOX2 20726797 ChIP-Seq SW620 Human | SOX2 |
| BIN3     | Enrichr CHEA_2022: SOX2 20726797 ChIP-Seq SW620 Human | SOX2 |
| HOXB3    | Enrichr CHEA_2022: SOX2 20726797 ChIP-Seq SW620 Human | SOX2 |
| SSPN     | Enrichr CHEA_2022: SOX2 20726797 ChIP-Seq SW620 Human | SOX2 |
| HBP1     | Enrichr CHEA_2022: SOX2 20726797 ChIP-Seq SW620 Human | SOX2 |
| HOXB9    | Enrichr CHEA_2022: SOX2 20726797 ChIP-Seq SW620 Human | SOX2 |
| HSPA4L   | Enrichr CHEA_2022: SOX2 20726797 ChIP-Seq SW620 Human | SOX2 |
| RPL5     | Enrichr CHEA_2022: SOX2 20726797 ChIP-Seq SW620 Human | SOX2 |
| CDC42SE2 | Enrichr CHEA_2022: SOX2 20726797 ChIP-Seq SW620 Human | SOX2 |
| ZNF134   | Enrichr CHEA_2022: SOX2 20726797 ChIP-Seq SW620 Human | SOX2 |
| STMN3    | Enrichr CHEA_2022: SOX2 20726797 ChIP-Seq SW620 Human | SOX2 |
| ENO3     | Enrichr CHEA_2022: SOX2 20726797 ChIP-Seq SW620 Human | SOX2 |
| PRDX4    | Enrichr CHEA_2022: SOX2 20726797 ChIP-Seq SW620 Human | SOX2 |
| ZXDB     | Enrichr CHEA_2022: SOX2 20726797 ChIP-Seq SW620 Human | SOX2 |
| STMN1    | Enrichr CHEA_2022: SOX2 20726797 ChIP-Seq SW620 Human | SOX2 |
| RPL37    | Enrichr CHEA_2022: SOX2 20726797 ChIP-Seq SW620 Human | SOX2 |
| PLCG1    | Enrichr CHEA_2022: SOX2 20726797 ChIP-Seq SW620 Human | SOX2 |
| IER5     | Enrichr CHEA_2022: SOX2 20726797 ChIP-Seq SW620 Human | SOX2 |
| ZNF124   | Enrichr CHEA_2022: SOX2 20726797 ChIP-Seq SW620 Human | SOX2 |
| BLCAP    | Enrichr CHEA_2022: SOX2 20726797 ChIP-Seq SW620 Human | SOX2 |
| ANXA4    | Enrichr CHEA_2022: SOX2 20726797 ChIP-Seq SW620 Human | SOX2 |
| CCL20    | Enrichr CHEA_2022: SOX2 20726797 ChIP-Seq SW620 Human | SOX2 |
| ANXA5    | Enrichr CHEA_2022: SOX2 20726797 ChIP-Seq SW620 Human | SOX2 |
| TESC     | Enrichr CHEA_2022: SOX2 20726797 ChIP-Seq SW620 Human | SOX2 |
| PAX6     | Enrichr CHEA_2022: SOX2 20726797 ChIP-Seq SW620 Human | SOX2 |
| TIMM22   | Enrichr CHEA_2022: SOX2 20726797 ChIP-Seq SW620 Human | SOX2 |
| CARD6    | Enrichr CHEA_2022: SOX2 20726797 ChIP-Seq SW620 Human | SOX2 |
| ITPKA    | Enrichr CHEA_2022: SOX2 20726797 ChIP-Seq SW620 Human | SOX2 |
| GIPC2    | Enrichr CHEA_2022: SOX2 20726797 ChIP-Seq SW620 Human | SOX2 |
| JDP2     | Enrichr CHEA_2022: SOX2 20726797 ChIP-Seq SW620 Human | SOX2 |
| RNF141   | Enrichr CHEA_2022: SOX2 20726797 ChIP-Seq SW620 Human | SOX2 |
| REN      | Enrichr CHEA_2022: SOX2 20726797 ChIP-Seq SW620 Human | SOX2 |
| ADA      | Enrichr CHEA_2022: SOX2 20726797 ChIP-Seq SW620 Human | SOX2 |
| SERPINA1 | Enrichr CHEA_2022: SOX2 20726797 ChIP-Seq SW620 Human | SOX2 |
| CLTA     | Enrichr CHEA_2022: SOX2 20726797 ChIP-Seq SW620 Human | SOX2 |
| GLG1     | Enrichr CHEA_2022: SOX2 20726797 ChIP-Seq SW620 Human | SOX2 |



|          |                                                       |      |
|----------|-------------------------------------------------------|------|
| RNF157   | Enrichr CHEA_2022: SOX2 20726797 ChIP-Seq SW620 Human | SOX2 |
| CSRP2    | Enrichr CHEA_2022: SOX2 20726797 ChIP-Seq SW620 Human | SOX2 |
| TRIM4    | Enrichr CHEA_2022: SOX2 20726797 ChIP-Seq SW620 Human | SOX2 |
| GPRASP2  | Enrichr CHEA_2022: SOX2 20726797 ChIP-Seq SW620 Human | SOX2 |
| ZNF589   | Enrichr CHEA_2022: SOX2 20726797 ChIP-Seq SW620 Human | SOX2 |
| TIGD2    | Enrichr CHEA_2022: SOX2 20726797 ChIP-Seq SW620 Human | SOX2 |
| ZNF587   | Enrichr CHEA_2022: SOX2 20726797 ChIP-Seq SW620 Human | SOX2 |
| ZNF586   | Enrichr CHEA_2022: SOX2 20726797 ChIP-Seq SW620 Human | SOX2 |
| WVVOX    | Enrichr CHEA_2022: SOX2 20726797 ChIP-Seq SW620 Human | SOX2 |
| SERPINB5 | Enrichr CHEA_2022: SOX2 20726797 ChIP-Seq SW620 Human | SOX2 |
| SF3A3    | Enrichr CHEA_2022: SOX2 20726797 ChIP-Seq SW620 Human | SOX2 |
| SERPINB3 | Enrichr CHEA_2022: SOX2 20726797 ChIP-Seq SW620 Human | SOX2 |
| IFNGR1   | Enrichr CHEA_2022: SOX2 20726797 ChIP-Seq SW620 Human | SOX2 |
| TMOD3    | Enrichr CHEA_2022: SOX2 20726797 ChIP-Seq SW620 Human | SOX2 |
| WWP1     | Enrichr CHEA_2022: SOX2 20726797 ChIP-Seq SW620 Human | SOX2 |
| LAPTM5   | Enrichr CHEA_2022: SOX2 20726797 ChIP-Seq SW620 Human | SOX2 |
| EN2      | Enrichr CHEA_2022: SOX2 20726797 ChIP-Seq SW620 Human | SOX2 |
| ADAT1    | Enrichr CHEA_2022: SOX2 20726797 ChIP-Seq SW620 Human | SOX2 |
| GTF2H2   | Enrichr CHEA_2022: SOX2 20726797 ChIP-Seq SW620 Human | SOX2 |
| NMNAT3   | Enrichr CHEA_2022: SOX2 20726797 ChIP-Seq SW620 Human | SOX2 |
| TTC7B    | Enrichr CHEA_2022: SOX2 20726797 ChIP-Seq SW620 Human | SOX2 |
| SERPINB8 | Enrichr CHEA_2022: SOX2 20726797 ChIP-Seq SW620 Human | SOX2 |
| SULF2    | Enrichr CHEA_2022: SOX2 20726797 ChIP-Seq SW620 Human | SOX2 |
| TMEM154  | Enrichr CHEA_2022: SOX2 20726797 ChIP-Seq SW620 Human | SOX2 |
| COL4A2   | Enrichr CHEA_2022: SOX2 20726797 ChIP-Seq SW620 Human | SOX2 |
| RFWD3    | Enrichr CHEA_2022: SOX2 20726797 ChIP-Seq SW620 Human | SOX2 |
| MSRB3    | Enrichr CHEA_2022: SOX2 20726797 ChIP-Seq SW620 Human | SOX2 |
| NOTUM    | Enrichr CHEA_2022: SOX2 20726797 ChIP-Seq SW620 Human | SOX2 |
| HBEGF    | Enrichr CHEA_2022: SOX2 20726797 ChIP-Seq SW620 Human | SOX2 |
| BSCL2    | Enrichr CHEA_2022: SOX2 20726797 ChIP-Seq SW620 Human | SOX2 |
| ZNF573   | Enrichr CHEA_2022: SOX2 20726797 ChIP-Seq SW620 Human | SOX2 |
| CCL14    | Enrichr CHEA_2022: SOX2 20726797 ChIP-Seq SW620 Human | SOX2 |
| PFAS     | Enrichr CHEA_2022: SOX2 20726797 ChIP-Seq SW620 Human | SOX2 |
| ZNF572   | Enrichr CHEA_2022: SOX2 20726797 ChIP-Seq SW620 Human | SOX2 |
| OGG1     | Enrichr CHEA_2022: SOX2 20726797 ChIP-Seq SW620 Human | SOX2 |
| TGFB11   | Enrichr CHEA_2022: SOX2 20726797 ChIP-Seq SW620 Human | SOX2 |
| TMEM141  | Enrichr CHEA_2022: SOX2 20726797 ChIP-Seq SW620 Human | SOX2 |
| PRSS23   | Enrichr CHEA_2022: SOX2 20726797 ChIP-Seq SW620 Human | SOX2 |
| RNF135   | Enrichr CHEA_2022: SOX2 20726797 ChIP-Seq SW620 Human | SOX2 |
| FAM102B  | Enrichr CHEA_2022: SOX2 20726797 ChIP-Seq SW620 Human | SOX2 |
| RNF139   | Enrichr CHEA_2022: SOX2 20726797 ChIP-Seq SW620 Human | SOX2 |
| CHN2     | Enrichr CHEA_2022: SOX2 20726797 ChIP-Seq SW620 Human | SOX2 |
| METTL7A  | Enrichr CHEA_2022: SOX2 20726797 ChIP-Seq SW620 Human | SOX2 |
| CHN1     | Enrichr CHEA_2022: SOX2 20726797 ChIP-Seq SW620 Human | SOX2 |
| GCNT3    | Enrichr CHEA_2022: SOX2 20726797 ChIP-Seq SW620 Human | SOX2 |
| ANXA9    | Enrichr CHEA_2022: SOX2 20726797 ChIP-Seq SW620 Human | SOX2 |
| RIOK2    | Enrichr CHEA_2022: SOX2 20726797 ChIP-Seq SW620 Human | SOX2 |
| ANKRD50  | Enrichr CHEA_2022: SOX2 20726797 ChIP-Seq SW620 Human | SOX2 |
| ZNF567   | Enrichr CHEA_2022: SOX2 20726797 ChIP-Seq SW620 Human | SOX2 |
| BRD7     | Enrichr CHEA_2022: SOX2 20726797 ChIP-Seq SW620 Human | SOX2 |
| TNKS1BP1 | Enrichr CHEA_2022: SOX2 20726797 ChIP-Seq SW620 Human | SOX2 |
| ZNF565   | Enrichr CHEA_2022: SOX2 20726797 ChIP-Seq SW620 Human | SOX2 |
| RNF43    | Enrichr CHEA_2022: SOX2 20726797 ChIP-Seq SW620 Human | SOX2 |
| SEMA4B   | Enrichr CHEA_2022: SOX2 20726797 ChIP-Seq SW620 Human | SOX2 |
| PHLDA1   | Enrichr CHEA_2022: SOX2 20726797 ChIP-Seq SW620 Human | SOX2 |
| BRF2     | Enrichr CHEA_2022: SOX2 20726797 ChIP-Seq SW620 Human | SOX2 |
| SEMA4F   | Enrichr CHEA_2022: SOX2 20726797 ChIP-Seq SW620 Human | SOX2 |
| SEMA4C   | Enrichr CHEA_2022: SOX2 20726797 ChIP-Seq SW620 Human | SOX2 |
| PLCL2    | Enrichr CHEA_2022: SOX2 20726797 ChIP-Seq SW620 Human | SOX2 |

|         |                                                       |      |
|---------|-------------------------------------------------------|------|
| SEMA4D  | Enrichr CHEA_2022: SOX2 20726797 ChIP-Seq SW620 Human | SOX2 |
| GPT2    | Enrichr CHEA_2022: SOX2 20726797 ChIP-Seq SW620 Human | SOX2 |
| FAM24B  | Enrichr CHEA_2022: SOX2 20726797 ChIP-Seq SW620 Human | SOX2 |
| CYBRD1  | Enrichr CHEA_2022: SOX2 20726797 ChIP-Seq SW620 Human | SOX2 |
| SEMA4G  | Enrichr CHEA_2022: SOX2 20726797 ChIP-Seq SW620 Human | SOX2 |
| CNOT7   | Enrichr CHEA_2022: SOX2 20726797 ChIP-Seq SW620 Human | SOX2 |
| SYPL1   | Enrichr CHEA_2022: SOX2 20726797 ChIP-Seq SW620 Human | SOX2 |
| RNF183  | Enrichr CHEA_2022: SOX2 20726797 ChIP-Seq SW620 Human | SOX2 |
| TUSC1   | Enrichr CHEA_2022: SOX2 20726797 ChIP-Seq SW620 Human | SOX2 |
| ANKRD22 | Enrichr CHEA_2022: SOX2 20726797 ChIP-Seq SW620 Human | SOX2 |
| ZNF559  | Enrichr CHEA_2022: SOX2 20726797 ChIP-Seq SW620 Human | SOX2 |
| TNIK    | Enrichr CHEA_2022: SOX2 20726797 ChIP-Seq SW620 Human | SOX2 |
| SLC28A3 | Enrichr CHEA_2022: SOX2 20726797 ChIP-Seq SW620 Human | SOX2 |
| RNF32   | Enrichr CHEA_2022: SOX2 20726797 ChIP-Seq SW620 Human | SOX2 |
| DGKH    | Enrichr CHEA_2022: SOX2 20726797 ChIP-Seq SW620 Human | SOX2 |
| ZNF552  | Enrichr CHEA_2022: SOX2 20726797 ChIP-Seq SW620 Human | SOX2 |
| ZNF551  | Enrichr CHEA_2022: SOX2 20726797 ChIP-Seq SW620 Human | SOX2 |
| COL16A1 | Enrichr CHEA_2022: SOX2 20726797 ChIP-Seq SW620 Human | SOX2 |
| PHLDB2  | Enrichr CHEA_2022: SOX2 20726797 ChIP-Seq SW620 Human | SOX2 |
| ZNF550  | Enrichr CHEA_2022: SOX2 20726797 ChIP-Seq SW620 Human | SOX2 |
| ANKRD37 | Enrichr CHEA_2022: SOX2 20726797 ChIP-Seq SW620 Human | SOX2 |
| AHR     | Enrichr CHEA_2022: SOX2 20726797 ChIP-Seq SW620 Human | SOX2 |
| METRNL  | Enrichr CHEA_2022: SOX2 20726797 ChIP-Seq SW620 Human | SOX2 |
| TANK    | Enrichr CHEA_2022: SOX2 20726797 ChIP-Seq SW620 Human | SOX2 |
| PYCARD  | Enrichr CHEA_2022: SOX2 20726797 ChIP-Seq SW620 Human | SOX2 |
| AP3M2   | Enrichr CHEA_2022: SOX2 20726797 ChIP-Seq SW620 Human | SOX2 |
| ZFP36   | Enrichr CHEA_2022: SOX2 20726797 ChIP-Seq SW620 Human | SOX2 |
| TUBB6   | Enrichr CHEA_2022: SOX2 20726797 ChIP-Seq SW620 Human | SOX2 |
| ZFP30   | Enrichr CHEA_2022: SOX2 20726797 ChIP-Seq SW620 Human | SOX2 |
| GRB14   | Enrichr CHEA_2022: SOX2 20726797 ChIP-Seq SW620 Human | SOX2 |
| ZNF548  | Enrichr CHEA_2022: SOX2 20726797 ChIP-Seq SW620 Human | SOX2 |
| ACSS1   | Enrichr CHEA_2022: SOX2 20726797 ChIP-Seq SW620 Human | SOX2 |
| IGFBP2  | Enrichr CHEA_2022: SOX2 20726797 ChIP-Seq SW620 Human | SOX2 |
| BIVM    | Enrichr CHEA_2022: SOX2 20726797 ChIP-Seq SW620 Human | SOX2 |
| F2R     | Enrichr CHEA_2022: SOX2 20726797 ChIP-Seq SW620 Human | SOX2 |
| RNF170  | Enrichr CHEA_2022: SOX2 20726797 ChIP-Seq SW620 Human | SOX2 |
| ADRA2A  | Enrichr CHEA_2022: SOX2 20726797 ChIP-Seq SW620 Human | SOX2 |
| DUSP23  | Enrichr CHEA_2022: SOX2 20726797 ChIP-Seq SW620 Human | SOX2 |
| ARMCX3  | Enrichr CHEA_2022: SOX2 20726797 ChIP-Seq SW620 Human | SOX2 |
| TRAF5   | Enrichr CHEA_2022: SOX2 20726797 ChIP-Seq SW620 Human | SOX2 |
| RHEB    | Enrichr CHEA_2022: SOX2 20726797 ChIP-Seq SW620 Human | SOX2 |
| TRAF4   | Enrichr CHEA_2022: SOX2 20726797 ChIP-Seq SW620 Human | SOX2 |
| ARMCX6  | Enrichr CHEA_2022: SOX2 20726797 ChIP-Seq SW620 Human | SOX2 |
| DGKQ    | Enrichr CHEA_2022: SOX2 20726797 ChIP-Seq SW620 Human | SOX2 |
| ILDR1   | Enrichr CHEA_2022: SOX2 20726797 ChIP-Seq SW620 Human | SOX2 |
| ERF     | Enrichr CHEA_2022: SOX2 20726797 ChIP-Seq SW620 Human | SOX2 |
| ESAM    | Enrichr CHEA_2022: SOX2 20726797 ChIP-Seq SW620 Human | SOX2 |
| RLN2    | Enrichr CHEA_2022: SOX2 20726797 ChIP-Seq SW620 Human | SOX2 |
| ZNF530  | Enrichr CHEA_2022: SOX2 20726797 ChIP-Seq SW620 Human | SOX2 |
| IRS1    | Enrichr CHEA_2022: SOX2 20726797 ChIP-Seq SW620 Human | SOX2 |
| FMR1    | Enrichr CHEA_2022: SOX2 20726797 ChIP-Seq SW620 Human | SOX2 |
| BRI3    | Enrichr CHEA_2022: SOX2 20726797 ChIP-Seq SW620 Human | SOX2 |
| AK5     | Enrichr CHEA_2022: SOX2 20726797 ChIP-Seq SW620 Human | SOX2 |
| MYOM3   | Enrichr CHEA_2022: SOX2 20726797 ChIP-Seq SW620 Human | SOX2 |
| ABHD12  | Enrichr CHEA_2022: SOX2 20726797 ChIP-Seq SW620 Human | SOX2 |
| BAG4    | Enrichr CHEA_2022: SOX2 20726797 ChIP-Seq SW620 Human | SOX2 |
| ABHD10  | Enrichr CHEA_2022: SOX2 20726797 ChIP-Seq SW620 Human | SOX2 |
| ZNF529  | Enrichr CHEA_2022: SOX2 20726797 ChIP-Seq SW620 Human | SOX2 |
| ANKRD10 | Enrichr CHEA_2022: SOX2 20726797 ChIP-Seq SW620 Human | SOX2 |

|          |                                                       |      |
|----------|-------------------------------------------------------|------|
| SLC37A1  | Enrichr CHEA_2022: SOX2 20726797 ChIP-Seq SW620 Human | SOX2 |
| GPX3     | Enrichr CHEA_2022: SOX2 20726797 ChIP-Seq SW620 Human | SOX2 |
| GPX2     | Enrichr CHEA_2022: SOX2 20726797 ChIP-Seq SW620 Human | SOX2 |
| DTX3L    | Enrichr CHEA_2022: SOX2 20726797 ChIP-Seq SW620 Human | SOX2 |
| GPX7     | Enrichr CHEA_2022: SOX2 20726797 ChIP-Seq SW620 Human | SOX2 |
| SMARCE1  | Enrichr CHEA_2022: SOX2 20726797 ChIP-Seq SW620 Human | SOX2 |
| CFLAR    | Enrichr CHEA_2022: SOX2 20726797 ChIP-Seq SW620 Human | SOX2 |
| ASNS     | Enrichr CHEA_2022: SOX2 20726797 ChIP-Seq SW620 Human | SOX2 |
| PTPN13   | Enrichr CHEA_2022: SOX2 20726797 ChIP-Seq SW620 Human | SOX2 |
| CDC42BPA | Enrichr CHEA_2022: SOX2 20726797 ChIP-Seq SW620 Human | SOX2 |
| TPCN2    | Enrichr CHEA_2022: SOX2 20726797 ChIP-Seq SW620 Human | SOX2 |
| CUL4A    | Enrichr CHEA_2022: SOX2 20726797 ChIP-Seq SW620 Human | SOX2 |
| SERPINI1 | Enrichr CHEA_2022: SOX2 20726797 ChIP-Seq SW620 Human | SOX2 |
| NES      | Enrichr CHEA_2022: SOX2 20726797 ChIP-Seq SW620 Human | SOX2 |
| SERINC2  | Enrichr CHEA_2022: SOX2 20726797 ChIP-Seq SW620 Human | SOX2 |
| ZNF512   | Enrichr CHEA_2022: SOX2 20726797 ChIP-Seq SW620 Human | SOX2 |
| EIF4E2   | Enrichr CHEA_2022: SOX2 20726797 ChIP-Seq SW620 Human | SOX2 |
| METAP1   | Enrichr CHEA_2022: SOX2 20726797 ChIP-Seq SW620 Human | SOX2 |
| METAP2   | Enrichr CHEA_2022: SOX2 20726797 ChIP-Seq SW620 Human | SOX2 |
| SERINC5  | Enrichr CHEA_2022: SOX2 20726797 ChIP-Seq SW620 Human | SOX2 |
| TNKS     | Enrichr CHEA_2022: SOX2 20726797 ChIP-Seq SW620 Human | SOX2 |
| ITPR2    | Enrichr CHEA_2022: SOX2 20726797 ChIP-Seq SW620 Human | SOX2 |
| ITPR3    | Enrichr CHEA_2022: SOX2 20726797 ChIP-Seq SW620 Human | SOX2 |
| DUSP14   | Enrichr CHEA_2022: SOX2 20726797 ChIP-Seq SW620 Human | SOX2 |
| RAD21    | Enrichr CHEA_2022: SOX2 20726797 ChIP-Seq SW620 Human | SOX2 |
| PSAP     | Enrichr CHEA_2022: SOX2 20726797 ChIP-Seq SW620 Human | SOX2 |
| WASF1    | Enrichr CHEA_2022: SOX2 20726797 ChIP-Seq SW620 Human | SOX2 |
| SKIL     | Enrichr CHEA_2022: SOX2 20726797 ChIP-Seq SW620 Human | SOX2 |
| WASF3    | Enrichr CHEA_2022: SOX2 20726797 ChIP-Seq SW620 Human | SOX2 |
| IRX2     | Enrichr CHEA_2022: SOX2 20726797 ChIP-Seq SW620 Human | SOX2 |
| SPAG7    | Enrichr CHEA_2022: SOX2 20726797 ChIP-Seq SW620 Human | SOX2 |
| SPAG4    | Enrichr CHEA_2022: SOX2 20726797 ChIP-Seq SW620 Human | SOX2 |
| AMT      | Enrichr CHEA_2022: SOX2 20726797 ChIP-Seq SW620 Human | SOX2 |
| MND1     | Enrichr CHEA_2022: SOX2 20726797 ChIP-Seq SW620 Human | SOX2 |
| RAD50    | Enrichr CHEA_2022: SOX2 20726797 ChIP-Seq SW620 Human | SOX2 |
| RNF20    | Enrichr CHEA_2022: SOX2 20726797 ChIP-Seq SW620 Human | SOX2 |
| KLF2     | Enrichr CHEA_2022: SOX2 20726797 ChIP-Seq SW620 Human | SOX2 |
| ZFP90    | Enrichr CHEA_2022: SOX2 20726797 ChIP-Seq SW620 Human | SOX2 |
| RAD52    | Enrichr CHEA_2022: SOX2 20726797 ChIP-Seq SW620 Human | SOX2 |
| MGAT4B   | Enrichr CHEA_2022: SOX2 20726797 ChIP-Seq SW620 Human | SOX2 |
| ASPH     | Enrichr CHEA_2022: SOX2 20726797 ChIP-Seq SW620 Human | SOX2 |
| CD109    | Enrichr CHEA_2022: SOX2 20726797 ChIP-Seq SW620 Human | SOX2 |
| EVL      | Enrichr CHEA_2022: SOX2 20726797 ChIP-Seq SW620 Human | SOX2 |
| CLEC2D   | Enrichr CHEA_2022: SOX2 20726797 ChIP-Seq SW620 Human | SOX2 |
| SMPDL3B  | Enrichr CHEA_2022: SOX2 20726797 ChIP-Seq SW620 Human | SOX2 |
| FOLR1    | Enrichr CHEA_2022: SOX2 20726797 ChIP-Seq SW620 Human | SOX2 |
| SEMA3A   | Enrichr CHEA_2022: SOX2 20726797 ChIP-Seq SW620 Human | SOX2 |
| LSP1     | Enrichr CHEA_2022: SOX2 20726797 ChIP-Seq SW620 Human | SOX2 |
| SEMA3C   | Enrichr CHEA_2022: SOX2 20726797 ChIP-Seq SW620 Human | SOX2 |
| SEMA3F   | Enrichr CHEA_2022: SOX2 20726797 ChIP-Seq SW620 Human | SOX2 |
| SGCE     | Enrichr CHEA_2022: SOX2 20726797 ChIP-Seq SW620 Human | SOX2 |
| OPA1     | Enrichr CHEA_2022: SOX2 20726797 ChIP-Seq SW620 Human | SOX2 |
| OPA3     | Enrichr CHEA_2022: SOX2 20726797 ChIP-Seq SW620 Human | SOX2 |
| NHS      | Enrichr CHEA_2022: SOX2 20726797 ChIP-Seq SW620 Human | SOX2 |
| PTPRN2   | Enrichr CHEA_2022: SOX2 20726797 ChIP-Seq SW620 Human | SOX2 |
| CDON     | Enrichr CHEA_2022: SOX2 20726797 ChIP-Seq SW620 Human | SOX2 |
| SS18L1   | Enrichr CHEA_2022: SOX2 20726797 ChIP-Seq SW620 Human | SOX2 |
| SP110    | Enrichr CHEA_2022: SOX2 20726797 ChIP-Seq SW620 Human | SOX2 |
| ACSL1    | Enrichr CHEA_2022: SOX2 20726797 ChIP-Seq SW620 Human | SOX2 |

|          |                                                       |      |
|----------|-------------------------------------------------------|------|
| RUNX1    | Enrichr CHEA_2022: SOX2 20726797 ChIP-Seq SW620 Human | SOX2 |
| RECQL    | Enrichr CHEA_2022: SOX2 20726797 ChIP-Seq SW620 Human | SOX2 |
| ACSL5    | Enrichr CHEA_2022: SOX2 20726797 ChIP-Seq SW620 Human | SOX2 |
| RUNX3    | Enrichr CHEA_2022: SOX2 20726797 ChIP-Seq SW620 Human | SOX2 |
| MTUS1    | Enrichr CHEA_2022: SOX2 20726797 ChIP-Seq SW620 Human | SOX2 |
| RUNX2    | Enrichr CHEA_2022: SOX2 20726797 ChIP-Seq SW620 Human | SOX2 |
| MALL     | Enrichr CHEA_2022: SOX2 20726797 ChIP-Seq SW620 Human | SOX2 |
| RHEBL1   | Enrichr CHEA_2022: SOX2 20726797 ChIP-Seq SW620 Human | SOX2 |
| XRN2     | Enrichr CHEA_2022: SOX2 20726797 ChIP-Seq SW620 Human | SOX2 |
| RRAGD    | Enrichr CHEA_2022: SOX2 20726797 ChIP-Seq SW620 Human | SOX2 |
| TMCC1    | Enrichr CHEA_2022: SOX2 20726797 ChIP-Seq SW620 Human | SOX2 |
| GUF1     | Enrichr CHEA_2022: SOX2 20726797 ChIP-Seq SW620 Human | SOX2 |
| TFAM     | Enrichr CHEA_2022: SOX2 20726797 ChIP-Seq SW620 Human | SOX2 |
| PFN2     | Enrichr CHEA_2022: SOX2 20726797 ChIP-Seq SW620 Human | SOX2 |
| SPRR3    | Enrichr CHEA_2022: SOX2 20726797 ChIP-Seq SW620 Human | SOX2 |
| GLS2     | Enrichr CHEA_2022: SOX2 20726797 ChIP-Seq SW620 Human | SOX2 |
| CMAS     | Enrichr CHEA_2022: SOX2 20726797 ChIP-Seq SW620 Human | SOX2 |
| VIPR1    | Enrichr CHEA_2022: SOX2 20726797 ChIP-Seq SW620 Human | SOX2 |
| GLRX     | Enrichr CHEA_2022: SOX2 20726797 ChIP-Seq SW620 Human | SOX2 |
| RAD54B   | Enrichr CHEA_2022: SOX2 20726797 ChIP-Seq SW620 Human | SOX2 |
| ANTXR2   | Enrichr CHEA_2022: SOX2 20726797 ChIP-Seq SW620 Human | SOX2 |
| CARHSP1  | Enrichr CHEA_2022: SOX2 20726797 ChIP-Seq SW620 Human | SOX2 |
| ANTXR1   | Enrichr CHEA_2022: SOX2 20726797 ChIP-Seq SW620 Human | SOX2 |
| CHAC1    | Enrichr CHEA_2022: SOX2 20726797 ChIP-Seq SW620 Human | SOX2 |
| MAL2     | Enrichr CHEA_2022: SOX2 20726797 ChIP-Seq SW620 Human | SOX2 |
| RABGAP1L | Enrichr CHEA_2022: SOX2 20726797 ChIP-Seq SW620 Human | SOX2 |
| AQR      | Enrichr CHEA_2022: SOX2 20726797 ChIP-Seq SW620 Human | SOX2 |
| LIX1L    | Enrichr CHEA_2022: SOX2 20726797 ChIP-Seq SW620 Human | SOX2 |
| GADD45B  | Enrichr CHEA_2022: SOX2 20726797 ChIP-Seq SW620 Human | SOX2 |
| GADD45A  | Enrichr CHEA_2022: SOX2 20726797 ChIP-Seq SW620 Human | SOX2 |
| SLC11A2  | Enrichr CHEA_2022: SOX2 20726797 ChIP-Seq SW620 Human | SOX2 |
| ACADSB   | Enrichr CHEA_2022: SOX2 20726797 ChIP-Seq SW620 Human | SOX2 |
| OVOL1    | Enrichr CHEA_2022: SOX2 20726797 ChIP-Seq SW620 Human | SOX2 |
| IL17RD   | Enrichr CHEA_2022: SOX2 20726797 ChIP-Seq SW620 Human | SOX2 |
| PARP14   | Enrichr CHEA_2022: SOX2 20726797 ChIP-Seq SW620 Human | SOX2 |
| INPP4B   | Enrichr CHEA_2022: SOX2 20726797 ChIP-Seq SW620 Human | SOX2 |
| PARP12   | Enrichr CHEA_2022: SOX2 20726797 ChIP-Seq SW620 Human | SOX2 |
| TSHZ1    | Enrichr CHEA_2022: SOX2 20726797 ChIP-Seq SW620 Human | SOX2 |
| TRMT12   | Enrichr CHEA_2022: SOX2 20726797 ChIP-Seq SW620 Human | SOX2 |
| ITM2C    | Enrichr CHEA_2022: SOX2 20726797 ChIP-Seq SW620 Human | SOX2 |
| CDS1     | Enrichr CHEA_2022: SOX2 20726797 ChIP-Seq SW620 Human | SOX2 |
| BEX2     | Enrichr CHEA_2022: SOX2 20726797 ChIP-Seq SW620 Human | SOX2 |
| ACSM3    | Enrichr CHEA_2022: SOX2 20726797 ChIP-Seq SW620 Human | SOX2 |
| MGST2    | Enrichr CHEA_2022: SOX2 20726797 ChIP-Seq SW620 Human | SOX2 |
| DIXDC1   | Enrichr CHEA_2022: SOX2 20726797 ChIP-Seq SW620 Human | SOX2 |
| EPM2AIP1 | Enrichr CHEA_2022: SOX2 20726797 ChIP-Seq SW620 Human | SOX2 |
| SOX2     | Enrichr CHEA_2022: SOX2 20726797 ChIP-Seq SW620 Human | SOX2 |
| INPP5F   | Enrichr CHEA_2022: SOX2 20726797 ChIP-Seq SW620 Human | SOX2 |
| ASL      | Enrichr CHEA_2022: SOX2 20726797 ChIP-Seq SW620 Human | SOX2 |
| ARL6IP5  | Enrichr CHEA_2022: SOX2 20726797 ChIP-Seq SW620 Human | SOX2 |
| TREX1    | Enrichr CHEA_2022: SOX2 20726797 ChIP-Seq SW620 Human | SOX2 |
| GLUL     | Enrichr CHEA_2022: SOX2 20726797 ChIP-Seq SW620 Human | SOX2 |
| GOLGA7   | Enrichr CHEA_2022: SOX2 20726797 ChIP-Seq SW620 Human | SOX2 |
| TNS4     | Enrichr CHEA_2022: SOX2 20726797 ChIP-Seq SW620 Human | SOX2 |
| SOX8     | Enrichr CHEA_2022: SOX2 20726797 ChIP-Seq SW620 Human | SOX2 |
| TNS3     | Enrichr CHEA_2022: SOX2 20726797 ChIP-Seq SW620 Human | SOX2 |
| CDR2     | Enrichr CHEA_2022: SOX2 20726797 ChIP-Seq SW620 Human | SOX2 |
| NMB      | Enrichr CHEA_2022: SOX2 20726797 ChIP-Seq SW620 Human | SOX2 |
| TSC22D2  | Enrichr CHEA_2022: SOX2 20726797 ChIP-Seq SW620 Human | SOX2 |

|          |                                                       |      |
|----------|-------------------------------------------------------|------|
| NMI      | Enrichr CHEA_2022: SOX2 20726797 ChIP-Seq SW620 Human | SOX2 |
| NME3     | Enrichr CHEA_2022: SOX2 20726797 ChIP-Seq SW620 Human | SOX2 |
| TFEB     | Enrichr CHEA_2022: SOX2 20726797 ChIP-Seq SW620 Human | SOX2 |
| KRT13    | Enrichr CHEA_2022: SOX2 20726797 ChIP-Seq SW620 Human | SOX2 |
| NME4     | Enrichr CHEA_2022: SOX2 20726797 ChIP-Seq SW620 Human | SOX2 |
| TUBE1    | Enrichr CHEA_2022: SOX2 20726797 ChIP-Seq SW620 Human | SOX2 |
| GNG12    | Enrichr CHEA_2022: SOX2 20726797 ChIP-Seq SW620 Human | SOX2 |
| PDZK1IP1 | Enrichr CHEA_2022: SOX2 20726797 ChIP-Seq SW620 Human | SOX2 |
| RAD51C   | Enrichr CHEA_2022: SOX2 20726797 ChIP-Seq SW620 Human | SOX2 |
| RHOQ     | Enrichr CHEA_2022: SOX2 20726797 ChIP-Seq SW620 Human | SOX2 |
| CEACAM1  | Enrichr CHEA_2022: SOX2 20726797 ChIP-Seq SW620 Human | SOX2 |
| NME7     | Enrichr CHEA_2022: SOX2 20726797 ChIP-Seq SW620 Human | SOX2 |
| R3HCC1   | Enrichr CHEA_2022: SOX2 20726797 ChIP-Seq SW620 Human | SOX2 |
| KRT17    | Enrichr CHEA_2022: SOX2 20726797 ChIP-Seq SW620 Human | SOX2 |
| RPUSD3   | Enrichr CHEA_2022: SOX2 20726797 ChIP-Seq SW620 Human | SOX2 |
| CEACAM6  | Enrichr CHEA_2022: SOX2 20726797 ChIP-Seq SW620 Human | SOX2 |
| RPUSD4   | Enrichr CHEA_2022: SOX2 20726797 ChIP-Seq SW620 Human | SOX2 |
| ATM      | Enrichr CHEA_2022: SOX2 20726797 ChIP-Seq SW620 Human | SOX2 |
| TFF3     | Enrichr CHEA_2022: SOX2 20726797 ChIP-Seq SW620 Human | SOX2 |
| CAMK1    | Enrichr CHEA_2022: SOX2 20726797 ChIP-Seq SW620 Human | SOX2 |
| TFF1     | Enrichr CHEA_2022: SOX2 20726797 ChIP-Seq SW620 Human | SOX2 |
| SGK2     | Enrichr CHEA_2022: SOX2 20726797 ChIP-Seq SW620 Human | SOX2 |
| AKR1B10  | Enrichr CHEA_2022: SOX2 20726797 ChIP-Seq SW620 Human | SOX2 |
| RHOJ     | Enrichr CHEA_2022: SOX2 20726797 ChIP-Seq SW620 Human | SOX2 |
| TRAM2    | Enrichr CHEA_2022: SOX2 20726797 ChIP-Seq SW620 Human | SOX2 |
| CLIC5    | Enrichr CHEA_2022: SOX2 20726797 ChIP-Seq SW620 Human | SOX2 |
| CLIC4    | Enrichr CHEA_2022: SOX2 20726797 ChIP-Seq SW620 Human | SOX2 |
| MAOB     | Enrichr CHEA_2022: SOX2 20726797 ChIP-Seq SW620 Human | SOX2 |
| MAOA     | Enrichr CHEA_2022: SOX2 20726797 ChIP-Seq SW620 Human | SOX2 |
| IGSF3    | Enrichr CHEA_2022: SOX2 20726797 ChIP-Seq SW620 Human | SOX2 |
| KLK6     | Enrichr CHEA_2022: SOX2 20726797 ChIP-Seq SW620 Human | SOX2 |
| STC2     | Enrichr CHEA_2022: SOX2 20726797 ChIP-Seq SW620 Human | SOX2 |
| VLDLR    | Enrichr CHEA_2022: SOX2 20726797 ChIP-Seq SW620 Human | SOX2 |
| KRT20    | Enrichr CHEA_2022: SOX2 20726797 ChIP-Seq SW620 Human | SOX2 |
| NNT      | Enrichr CHEA_2022: SOX2 20726797 ChIP-Seq SW620 Human | SOX2 |
| HINT3    | Enrichr CHEA_2022: SOX2 20726797 ChIP-Seq SW620 Human | SOX2 |
| PITRM1   | Enrichr CHEA_2022: SOX2 20726797 ChIP-Seq SW620 Human | SOX2 |
| CLIC3    | Enrichr CHEA_2022: SOX2 20726797 ChIP-Seq SW620 Human | SOX2 |
| ARNT2    | Enrichr CHEA_2022: SOX2 20726797 ChIP-Seq SW620 Human | SOX2 |
| PRMT7    | Enrichr CHEA_2022: SOX2 20726797 ChIP-Seq SW620 Human | SOX2 |
| PRMT5    | Enrichr CHEA_2022: SOX2 20726797 ChIP-Seq SW620 Human | SOX2 |
| SCD5     | Enrichr CHEA_2022: SOX2 20726797 ChIP-Seq SW620 Human | SOX2 |
| RSL1D1   | Enrichr CHEA_2022: SOX2 20726797 ChIP-Seq SW620 Human | SOX2 |
| TJP2     | Enrichr CHEA_2022: SOX2 20726797 ChIP-Seq SW620 Human | SOX2 |
| TJP1     | Enrichr CHEA_2022: SOX2 20726797 ChIP-Seq SW620 Human | SOX2 |
| DNASE1L1 | Enrichr CHEA_2022: SOX2 20726797 ChIP-Seq SW620 Human | SOX2 |
| TJP3     | Enrichr CHEA_2022: SOX2 20726797 ChIP-Seq SW620 Human | SOX2 |
| DCP2     | Enrichr CHEA_2022: SOX2 20726797 ChIP-Seq SW620 Human | SOX2 |
| GDI1     | Enrichr CHEA_2022: SOX2 20726797 ChIP-Seq SW620 Human | SOX2 |
| PRIM1    | Enrichr CHEA_2022: SOX2 20726797 ChIP-Seq SW620 Human | SOX2 |
| HCCS     | Enrichr CHEA_2022: SOX2 20726797 ChIP-Seq SW620 Human | SOX2 |
| TRAK2    | Enrichr CHEA_2022: SOX2 20726797 ChIP-Seq SW620 Human | SOX2 |
| TRAK1    | Enrichr CHEA_2022: SOX2 20726797 ChIP-Seq SW620 Human | SOX2 |
| GYS1     | Enrichr CHEA_2022: SOX2 20726797 ChIP-Seq SW620 Human | SOX2 |
| NPW      | Enrichr CHEA_2022: SOX2 20726797 ChIP-Seq SW620 Human | SOX2 |
| MAP4K4   | Enrichr CHEA_2022: SOX2 20726797 ChIP-Seq SW620 Human | SOX2 |
| GDF11    | Enrichr CHEA_2022: SOX2 20726797 ChIP-Seq SW620 Human | SOX2 |
| CA13     | Enrichr CHEA_2022: SOX2 20726797 ChIP-Seq SW620 Human | SOX2 |
| BTNL9    | Enrichr CHEA_2022: SOX2 20726797 ChIP-Seq SW620 Human | SOX2 |

|          |                                                       |      |
|----------|-------------------------------------------------------|------|
| CA12     | Enrichr CHEA_2022: SOX2 20726797 ChIP-Seq SW620 Human | SOX2 |
| TGFB2    | Enrichr CHEA_2022: SOX2 20726797 ChIP-Seq SW620 Human | SOX2 |
| KLRC4    | Enrichr CHEA_2022: SOX2 20726797 ChIP-Seq SW620 Human | SOX2 |
| EPDR1    | Enrichr CHEA_2022: SOX2 20726797 ChIP-Seq SW620 Human | SOX2 |
| ARID3A   | Enrichr CHEA_2022: SOX2 20726797 ChIP-Seq SW620 Human | SOX2 |
| ARHGAP27 | Enrichr CHEA_2022: SOX2 20726797 ChIP-Seq SW620 Human | SOX2 |
| BATF     | Enrichr CHEA_2022: SOX2 20726797 ChIP-Seq SW620 Human | SOX2 |
| ZNFX1    | Enrichr CHEA_2022: SOX2 20726797 ChIP-Seq SW620 Human | SOX2 |
| GNPDA2   | Enrichr CHEA_2022: SOX2 20726797 ChIP-Seq SW620 Human | SOX2 |
| AXL      | Enrichr CHEA_2022: SOX2 20726797 ChIP-Seq SW620 Human | SOX2 |
| TMEM139  | Enrichr CHEA_2022: SOX2 20726797 ChIP-Seq SW620 Human | SOX2 |
| FAS      | Enrichr CHEA_2022: SOX2 20726797 ChIP-Seq SW620 Human | SOX2 |
| ELMO3    | Enrichr CHEA_2022: SOX2 20726797 ChIP-Seq SW620 Human | SOX2 |
| ABCG1    | Enrichr CHEA_2022: SOX2 20726797 ChIP-Seq SW620 Human | SOX2 |
| GOLT1A   | Enrichr CHEA_2022: SOX2 20726797 ChIP-Seq SW620 Human | SOX2 |
| SCG2     | Enrichr CHEA_2022: SOX2 20726797 ChIP-Seq SW620 Human | SOX2 |
| STEAP2   | Enrichr CHEA_2022: SOX2 20726797 ChIP-Seq SW620 Human | SOX2 |
| ABCG2    | Enrichr CHEA_2022: SOX2 20726797 ChIP-Seq SW620 Human | SOX2 |
| FAIM     | Enrichr CHEA_2022: SOX2 20726797 ChIP-Seq SW620 Human | SOX2 |
| STEAP1   | Enrichr CHEA_2022: SOX2 20726797 ChIP-Seq SW620 Human | SOX2 |
| GALNT12  | Enrichr CHEA_2022: SOX2 20726797 ChIP-Seq SW620 Human | SOX2 |
| GALNT14  | Enrichr CHEA_2022: SOX2 20726797 ChIP-Seq SW620 Human | SOX2 |
| SLFN5    | Enrichr CHEA_2022: SOX2 20726797 ChIP-Seq SW620 Human | SOX2 |
| HDLBP    | Enrichr CHEA_2022: SOX2 20726797 ChIP-Seq SW620 Human | SOX2 |
| IFI6     | Enrichr CHEA_2022: SOX2 20726797 ChIP-Seq SW620 Human | SOX2 |
| MANEA    | Enrichr CHEA_2022: SOX2 20726797 ChIP-Seq SW620 Human | SOX2 |
| GALNT10  | Enrichr CHEA_2022: SOX2 20726797 ChIP-Seq SW620 Human | SOX2 |
| ZFP36L2  | Enrichr CHEA_2022: SOX2 20726797 ChIP-Seq SW620 Human | SOX2 |
| SCEL     | Enrichr CHEA_2022: SOX2 20726797 ChIP-Seq SW620 Human | SOX2 |
| KRT6A    | Enrichr CHEA_2022: SOX2 20726797 ChIP-Seq SW620 Human | SOX2 |
| TMEM125  | Enrichr CHEA_2022: SOX2 20726797 ChIP-Seq SW620 Human | SOX2 |
| MYH14    | Enrichr CHEA_2022: SOX2 20726797 ChIP-Seq SW620 Human | SOX2 |
| MYH10    | Enrichr CHEA_2022: SOX2 20726797 ChIP-Seq SW620 Human | SOX2 |
| CLASP2   | Enrichr CHEA_2022: SOX2 20726797 ChIP-Seq SW620 Human | SOX2 |
| OPN3     | Enrichr CHEA_2022: SOX2 20726797 ChIP-Seq SW620 Human | SOX2 |
| USP47    | Enrichr CHEA_2022: SOX2 20726797 ChIP-Seq SW620 Human | SOX2 |
| SMAD3    | Enrichr CHEA_2022: SOX2 20726797 ChIP-Seq SW620 Human | SOX2 |
| PDIA3    | Enrichr CHEA_2022: SOX2 20726797 ChIP-Seq SW620 Human | SOX2 |
| SMAD5    | Enrichr CHEA_2022: SOX2 20726797 ChIP-Seq SW620 Human | SOX2 |
| ARID5B   | Enrichr CHEA_2022: SOX2 20726797 ChIP-Seq SW620 Human | SOX2 |
| DNAJC12  | Enrichr CHEA_2022: SOX2 20726797 ChIP-Seq SW620 Human | SOX2 |
| ASPSR1   | Enrichr CHEA_2022: SOX2 20726797 ChIP-Seq SW620 Human | SOX2 |
| CTPS2    | Enrichr CHEA_2022: SOX2 20726797 ChIP-Seq SW620 Human | SOX2 |
| CDYL     | Enrichr CHEA_2022: SOX2 20726797 ChIP-Seq SW620 Human | SOX2 |
| SMAD7    | Enrichr CHEA_2022: SOX2 20726797 ChIP-Seq SW620 Human | SOX2 |
| UPK3B    | Enrichr CHEA_2022: SOX2 20726797 ChIP-Seq SW620 Human | SOX2 |
| SMAD6    | Enrichr CHEA_2022: SOX2 20726797 ChIP-Seq SW620 Human | SOX2 |
| DNAJC18  | Enrichr CHEA_2022: SOX2 20726797 ChIP-Seq SW620 Human | SOX2 |
| SDCBP    | Enrichr CHEA_2022: SOX2 20726797 ChIP-Seq SW620 Human | SOX2 |
| PDIA6    | Enrichr CHEA_2022: SOX2 20726797 ChIP-Seq SW620 Human | SOX2 |
| ALDH3A2  | Enrichr CHEA_2022: SOX2 20726797 ChIP-Seq SW620 Human | SOX2 |
| PREPL    | Enrichr CHEA_2022: SOX2 20726797 ChIP-Seq SW620 Human | SOX2 |
| DLG4     | Enrichr CHEA_2022: SOX2 20726797 ChIP-Seq SW620 Human | SOX2 |
| CHMP7    | Enrichr CHEA_2022: SOX2 20726797 ChIP-Seq SW620 Human | SOX2 |
| ATP6V1A  | Enrichr CHEA_2022: SOX2 20726797 ChIP-Seq SW620 Human | SOX2 |
| DOCK4    | Enrichr CHEA_2022: SOX2 20726797 ChIP-Seq SW620 Human | SOX2 |
| USP54    | Enrichr CHEA_2022: SOX2 20726797 ChIP-Seq SW620 Human | SOX2 |
| SH3KBP1  | Enrichr CHEA_2022: SOX2 20726797 ChIP-Seq SW620 Human | SOX2 |
| SLC2A3   | Enrichr CHEA_2022: SOX2 20726797 ChIP-Seq SW620 Human | SOX2 |

|          |                                                       |      |
|----------|-------------------------------------------------------|------|
| ARHGAP18 | Enrichr CHEA_2022: SOX2 20726797 ChIP-Seq SW620 Human | SOX2 |
| PLCXD2   | Enrichr CHEA_2022: SOX2 20726797 ChIP-Seq SW620 Human | SOX2 |
| MYL6B    | Enrichr CHEA_2022: SOX2 20726797 ChIP-Seq SW620 Human | SOX2 |
| ARHGAP23 | Enrichr CHEA_2022: SOX2 20726797 ChIP-Seq SW620 Human | SOX2 |
| PODXL    | Enrichr CHEA_2022: SOX2 20726797 ChIP-Seq SW620 Human | SOX2 |
| MAN2A2   | Enrichr CHEA_2022: SOX2 20726797 ChIP-Seq SW620 Human | SOX2 |
| TMEM107  | Enrichr CHEA_2022: SOX2 20726797 ChIP-Seq SW620 Human | SOX2 |
| ALDH3B1  | Enrichr CHEA_2022: SOX2 20726797 ChIP-Seq SW620 Human | SOX2 |
| COBLL1   | Enrichr CHEA_2022: SOX2 20726797 ChIP-Seq SW620 Human | SOX2 |
| PSPH     | Enrichr CHEA_2022: SOX2 20726797 ChIP-Seq SW620 Human | SOX2 |
| USP25    | Enrichr CHEA_2022: SOX2 20726797 ChIP-Seq SW620 Human | SOX2 |
| ABCC5    | Enrichr CHEA_2022: SOX2 20726797 ChIP-Seq SW620 Human | SOX2 |
| ABCC3    | Enrichr CHEA_2022: SOX2 20726797 ChIP-Seq SW620 Human | SOX2 |
| HSPA5    | Enrichr CHEA_2022: SOX2 20726797 ChIP-Seq SW620 Human | SOX2 |
| SMURF1   | Enrichr CHEA_2022: SOX2 20726797 ChIP-Seq SW620 Human | SOX2 |
| HSPA2    | Enrichr CHEA_2022: SOX2 20726797 ChIP-Seq SW620 Human | SOX2 |
| NFKBIZ   | Enrichr CHEA_2022: SOX2 20726797 ChIP-Seq SW620 Human | SOX2 |
| TGFBR3   | Enrichr CHEA_2022: SOX2 20726797 ChIP-Seq SW620 Human | SOX2 |
| NAP1L5   | Enrichr CHEA_2022: SOX2 20726797 ChIP-Seq SW620 Human | SOX2 |
| DDX19A   | Enrichr CHEA_2022: SOX2 20726797 ChIP-Seq SW620 Human | SOX2 |
| DDX19B   | Enrichr CHEA_2022: SOX2 20726797 ChIP-Seq SW620 Human | SOX2 |
| MEIS2    | Enrichr CHEA_2022: SOX2 20726797 ChIP-Seq SW620 Human | SOX2 |
| MNS1     | Enrichr CHEA_2022: SOX2 20726797 ChIP-Seq SW620 Human | SOX2 |
| PRTFDC1  | Enrichr CHEA_2022: SOX2 20726797 ChIP-Seq SW620 Human | SOX2 |
| B4GALT1  | Enrichr CHEA_2022: SOX2 20726797 ChIP-Seq SW620 Human | SOX2 |
| MCTP1    | Enrichr CHEA_2022: SOX2 20726797 ChIP-Seq SW620 Human | SOX2 |
| ABCB1    | Enrichr CHEA_2022: SOX2 20726797 ChIP-Seq SW620 Human | SOX2 |
| NID1     | Enrichr CHEA_2022: SOX2 20726797 ChIP-Seq SW620 Human | SOX2 |
| MTIF3    | Enrichr CHEA_2022: SOX2 20726797 ChIP-Seq SW620 Human | SOX2 |
| CXCL1    | Enrichr CHEA_2022: SOX2 20726797 ChIP-Seq SW620 Human | SOX2 |
| DTX4     | Enrichr CHEA_2022: SOX2 20726797 ChIP-Seq SW620 Human | SOX2 |
| ELAVL2   | Enrichr CHEA_2022: SOX2 20726797 ChIP-Seq SW620 Human | SOX2 |
| CXCL3    | Enrichr CHEA_2022: SOX2 20726797 ChIP-Seq SW620 Human | SOX2 |
| MOSPD1   | Enrichr CHEA_2022: SOX2 20726797 ChIP-Seq SW620 Human | SOX2 |
| CXCL6    | Enrichr CHEA_2022: SOX2 20726797 ChIP-Seq SW620 Human | SOX2 |
| DPP4     | Enrichr CHEA_2022: SOX2 20726797 ChIP-Seq SW620 Human | SOX2 |
| DPP7     | Enrichr CHEA_2022: SOX2 20726797 ChIP-Seq SW620 Human | SOX2 |
| NRIP1    | Enrichr CHEA_2022: SOX2 20726797 ChIP-Seq SW620 Human | SOX2 |
| NRIP3    | Enrichr CHEA_2022: SOX2 20726797 ChIP-Seq SW620 Human | SOX2 |
| ERBB2    | Enrichr CHEA_2022: SOX2 20726797 ChIP-Seq SW620 Human | SOX2 |
| PDE4A    | Enrichr CHEA_2022: SOX2 20726797 ChIP-Seq SW620 Human | SOX2 |
| USP31    | Enrichr CHEA_2022: SOX2 20726797 ChIP-Seq SW620 Human | SOX2 |
| TCFL5    | Enrichr CHEA_2022: SOX2 20726797 ChIP-Seq SW620 Human | SOX2 |
| ZNF185   | Enrichr CHEA_2022: SOX2 20726797 ChIP-Seq SW620 Human | SOX2 |
| PDE4DIP  | Enrichr CHEA_2022: SOX2 20726797 ChIP-Seq SW620 Human | SOX2 |
| RWDD1    | Enrichr CHEA_2022: SOX2 20726797 ChIP-Seq SW620 Human | SOX2 |
| PDE4D    | Enrichr CHEA_2022: SOX2 20726797 ChIP-Seq SW620 Human | SOX2 |
| ZNF182   | Enrichr CHEA_2022: SOX2 20726797 ChIP-Seq SW620 Human | SOX2 |
| KCTD1    | Enrichr CHEA_2022: SOX2 20726797 ChIP-Seq SW620 Human | SOX2 |
| KCTD6    | Enrichr CHEA_2022: SOX2 20726797 ChIP-Seq SW620 Human | SOX2 |
| SGPP2    | Enrichr CHEA_2022: SOX2 20726797 ChIP-Seq SW620 Human | SOX2 |
| CLDN7    | Enrichr CHEA_2022: SOX2 20726797 ChIP-Seq SW620 Human | SOX2 |
| FMNL2    | Enrichr CHEA_2022: SOX2 20726797 ChIP-Seq SW620 Human | SOX2 |
| CLDN4    | Enrichr CHEA_2022: SOX2 20726797 ChIP-Seq SW620 Human | SOX2 |
| PALLD    | Enrichr CHEA_2022: SOX2 20726797 ChIP-Seq SW620 Human | SOX2 |
| COL8A1   | Enrichr CHEA_2022: SOX2 20726797 ChIP-Seq SW620 Human | SOX2 |
| HKDC1    | Enrichr CHEA_2022: SOX2 20726797 ChIP-Seq SW620 Human | SOX2 |
| VDAC3    | Enrichr CHEA_2022: SOX2 20726797 ChIP-Seq SW620 Human | SOX2 |
| SPRY2    | Enrichr CHEA_2022: SOX2 20726797 ChIP-Seq SW620 Human | SOX2 |

|          |                                                                                     |      |
|----------|-------------------------------------------------------------------------------------|------|
| SSBP2    | Enrichr CHEA_2022: SOX2 20726797 ChIP-Seq SW620 Human                               | SOX2 |
| B4GALT6  | Enrichr CHEA_2022: SOX2 20726797 ChIP-Seq SW620 Human                               | SOX2 |
| CAMK2D   | Enrichr CHEA_2022: SOX2 20726797 ChIP-Seq SW620 Human                               | SOX2 |
| TSEN34   | Enrichr CHEA_2022: SOX2 20726797 ChIP-Seq SW620 Human                               | SOX2 |
| STEAP4   | Enrichr CHEA_2022: SOX2 20726797 ChIP-Seq SW620 Human                               | SOX2 |
| ZNF174   | Enrichr CHEA_2022: SOX2 20726797 ChIP-Seq SW620 Human                               | SOX2 |
| USP11    | Enrichr CHEA_2022: SOX2 20726797 ChIP-Seq SW620 Human                               | SOX2 |
| USP12    | Enrichr CHEA_2022: SOX2 20726797 ChIP-Seq SW620 Human                               | SOX2 |
| USP13    | Enrichr CHEA_2022: SOX2 20726797 ChIP-Seq SW620 Human                               | SOX2 |
| CD163L1  | Enrichr CHEA_2022: SOX2 20726797 ChIP-Seq SW620 Human                               | SOX2 |
| HSPD1    | Enrichr CHEA_2022: SOX2 20726797 ChIP-Seq SW620 Human                               | SOX2 |
| USP18    | Enrichr CHEA_2022: SOX2 20726797 ChIP-Seq SW620 Human                               | SOX2 |
| SH3YL1   | Enrichr CHEA_2022: SOX2 20726797 ChIP-Seq SW620 Human                               | SOX2 |
| NT5DC1   | Enrichr CHEA_2022: SOX2 20726797 ChIP-Seq SW620 Human                               | SOX2 |
| PRRG4    | Enrichr CHEA_2022: SOX2 20726797 ChIP-Seq SW620 Human                               | SOX2 |
| POLB     | Enrichr CHEA_2022: SOX2 20726797 ChIP-Seq SW620 Human                               | SOX2 |
| VSIG2    | Enrichr CHEA_2022: SOX2 20726797 ChIP-Seq SW620 Human                               | SOX2 |
| VSIG1    | Enrichr CHEA_2022: SOX2 20726797 ChIP-Seq SW620 Human                               | SOX2 |
| CCNJL    | Enrichr TF Perturbations followed by expression: KLF5 20726797 ChIP-Seq SW620 Human | KLF5 |
| RBFOX3   | Enrichr TF Perturbations followed by expression: KLF5 20726797 ChIP-Seq SW620 Human | KLF5 |
| SP110    | Enrichr TF Perturbations followed by expression: KLF5 20726797 ChIP-Seq SW620 Human | KLF5 |
| HOMER2   | Enrichr TF Perturbations followed by expression: KLF5 20726797 ChIP-Seq SW620 Human | KLF5 |
| KRT4     | Enrichr TF Perturbations followed by expression: KLF5 20726797 ChIP-Seq SW620 Human | KLF5 |
| ARL14    | Enrichr TF Perturbations followed by expression: KLF5 20726797 ChIP-Seq SW620 Human | KLF5 |
| CKMT1A   | Enrichr TF Perturbations followed by expression: KLF5 20726797 ChIP-Seq SW620 Human | KLF5 |
| KRT7     | Enrichr TF Perturbations followed by expression: KLF5 20726797 ChIP-Seq SW620 Human | KLF5 |
| L1CAM    | Enrichr TF Perturbations followed by expression: KLF5 20726797 ChIP-Seq SW620 Human | KLF5 |
| MALL     | Enrichr TF Perturbations followed by expression: KLF5 20726797 ChIP-Seq SW620 Human | KLF5 |
| CAPN13   | Enrichr TF Perturbations followed by expression: KLF5 20726797 ChIP-Seq SW620 Human | KLF5 |
| LGALS12  | Enrichr TF Perturbations followed by expression: KLF5 20726797 ChIP-Seq SW620 Human | KLF5 |
| MYL9     | Enrichr TF Perturbations followed by expression: KLF5 20726797 ChIP-Seq SW620 Human | KLF5 |
| VIP      | Enrichr TF Perturbations followed by expression: KLF5 20726797 ChIP-Seq SW620 Human | KLF5 |
| EPHA4    | Enrichr TF Perturbations followed by expression: KLF5 20726797 ChIP-Seq SW620 Human | KLF5 |
| CHIC1    | Enrichr TF Perturbations followed by expression: KLF5 20726797 ChIP-Seq SW620 Human | KLF5 |
| SYNPO2   | Enrichr TF Perturbations followed by expression: KLF5 20726797 ChIP-Seq SW620 Human | KLF5 |
| MST1R    | Enrichr TF Perturbations followed by expression: KLF5 20726797 ChIP-Seq SW620 Human | KLF5 |
| CRACR2A  | Enrichr TF Perturbations followed by expression: KLF5 20726797 ChIP-Seq SW620 Human | KLF5 |
| MUC1     | Enrichr TF Perturbations followed by expression: KLF5 20726797 ChIP-Seq SW620 Human | KLF5 |
| STRIP2   | Enrichr TF Perturbations followed by expression: KLF5 20726797 ChIP-Seq SW620 Human | KLF5 |
| GNG3     | Enrichr TF Perturbations followed by expression: KLF5 20726797 ChIP-Seq SW620 Human | KLF5 |
| CREB3L4  | Enrichr TF Perturbations followed by expression: KLF5 20726797 ChIP-Seq SW620 Human | KLF5 |
| SV2C     | Enrichr TF Perturbations followed by expression: KLF5 20726797 ChIP-Seq SW620 Human | KLF5 |
| GMD5     | Enrichr TF Perturbations followed by expression: KLF5 20726797 ChIP-Seq SW620 Human | KLF5 |
| SPOCK3   | Enrichr TF Perturbations followed by expression: KLF5 20726797 ChIP-Seq SW620 Human | KLF5 |
| S100A14  | Enrichr TF Perturbations followed by expression: KLF5 20726797 ChIP-Seq SW620 Human | KLF5 |
| SUSD4    | Enrichr TF Perturbations followed by expression: KLF5 20726797 ChIP-Seq SW620 Human | KLF5 |
| SPOCK2   | Enrichr TF Perturbations followed by expression: KLF5 20726797 ChIP-Seq SW620 Human | KLF5 |
| MUC4     | Enrichr TF Perturbations followed by expression: KLF5 20726797 ChIP-Seq SW620 Human | KLF5 |
| SLC12A8  | Enrichr TF Perturbations followed by expression: KLF5 20726797 ChIP-Seq SW620 Human | KLF5 |
| PPARGC1B | Enrichr TF Perturbations followed by expression: KLF5 20726797 ChIP-Seq SW620 Human | KLF5 |
| FZD3     | Enrichr TF Perturbations followed by expression: KLF5 20726797 ChIP-Seq SW620 Human | KLF5 |
| PAQR6    | Enrichr TF Perturbations followed by expression: KLF5 20726797 ChIP-Seq SW620 Human | KLF5 |
| RAB27A   | Enrichr TF Perturbations followed by expression: KLF5 20726797 ChIP-Seq SW620 Human | KLF5 |
| CMBL     | Enrichr TF Perturbations followed by expression: KLF5 20726797 ChIP-Seq SW620 Human | KLF5 |
| ANK2     | Enrichr TF Perturbations followed by expression: KLF5 20726797 ChIP-Seq SW620 Human | KLF5 |
| FA2H     | Enrichr TF Perturbations followed by expression: KLF5 20726797 ChIP-Seq SW620 Human | KLF5 |
| CNKS2R2  | Enrichr TF Perturbations followed by expression: KLF5 20726797 ChIP-Seq SW620 Human | KLF5 |
| POR      | Enrichr TF Perturbations followed by expression: KLF5 20726797 ChIP-Seq SW620 Human | KLF5 |
| RIPPLY3  | Enrichr TF Perturbations followed by expression: KLF5 20726797 ChIP-Seq SW620 Human | KLF5 |









|          |                                                                                     |             |
|----------|-------------------------------------------------------------------------------------|-------------|
| UPK1B    | Enrichr TF Perturbations followed by expression: KLF5 20726797 ChIP-Seq SW620 Human | KLF5        |
| RDH16    | Enrichr TF Perturbations followed by expression: KLF5 20726797 ChIP-Seq SW620 Human | KLF5        |
| CPXM2    | Enrichr TF Perturbations followed by expression: KLF5 20726797 ChIP-Seq SW620 Human | KLF5        |
| SYMPK    | Enrichr TF Perturbations followed by expression: KLF5 20726797 ChIP-Seq SW620 Human | KLF5        |
| CASP1    | Enrichr TF Perturbations followed by expression: KLF5 20726797 ChIP-Seq SW620 Human | KLF5        |
| FAM83E   | Enrichr TF Perturbations followed by expression: KLF5 20726797 ChIP-Seq SW620 Human | KLF5        |
| PRPH     | Enrichr TF Perturbations followed by expression: KLF5 20726797 ChIP-Seq SW620 Human | KLF5        |
| WNT4     | Enrichr TF Perturbations followed by expression: KLF5 20726797 ChIP-Seq SW620 Human | KLF5        |
| HGFAC    | Enrichr TF Perturbations followed by expression: KLF5 20726797 ChIP-Seq SW620 Human | KLF5        |
| TBX1     | Enrichr TF Perturbations followed by expression: KLF5 20726797 ChIP-Seq SW620 Human | KLF5        |
| CAMK1D   | Enrichr TF Perturbations followed by expression: KLF5 20726797 ChIP-Seq SW620 Human | KLF5        |
| MUC5B    | Enrichr TF Perturbations followed by expression: KLF5 20726797 ChIP-Seq SW620 Human | KLF5        |
| STYK1    | Enrichr TF Perturbations followed by expression: KLF5 20726797 ChIP-Seq SW620 Human | KLF5        |
| DCXR     | Enrichr TF Perturbations followed by expression: KLF5 20726797 ChIP-Seq SW620 Human | KLF5        |
| SYT16    | Enrichr TF Perturbations followed by expression: KLF5 20726797 ChIP-Seq SW620 Human | KLF5        |
| MCOLN2   | Enrichr TF Perturbations followed by expression: KLF5 20726797 ChIP-Seq SW620 Human | KLF5        |
| KLF5     | Enrichr TF Perturbations followed by expression: KLF5 20726797 ChIP-Seq SW620 Human | KLF5        |
| HTR3A    | Enrichr TF Perturbations followed by expression: KLF5 20726797 ChIP-Seq SW620 Human | KLF5        |
| HSH2D    | Enrichr TF Perturbations followed by expression: KLF5 20726797 ChIP-Seq SW620 Human | KLF5        |
| TST      | Enrichr TF Perturbations followed by expression: KLF5 20726797 ChIP-Seq SW620 Human | KLF5        |
| P2RX1    | Enrichr TF Perturbations followed by expression: KLF5 20726797 ChIP-Seq SW620 Human | KLF5        |
| LTF      | Enrichr TF Perturbations followed by expression: KLF5 20726797 ChIP-Seq SW620 Human | KLF5        |
| ASPA     | Enrichr TF Perturbations followed by expression: KLF5 20726797 ChIP-Seq SW620 Human | KLF5        |
| SLC24A3  | Enrichr TF Perturbations followed by expression: KLF5 20726797 ChIP-Seq SW620 Human | KLF5        |
| SH2D4A   | Enrichr TF Perturbations followed by expression: KLF5 20726797 ChIP-Seq SW620 Human | KLF5        |
| MSLN     | Enrichr TF Perturbations followed by expression: KLF5 20726797 ChIP-Seq SW620 Human | KLF5        |
| TRIM31   | Enrichr TF Perturbations followed by expression: KLF5 20726797 ChIP-Seq SW620 Human | KLF5        |
| PSCA     | Enrichr TF Perturbations followed by expression: KLF5 20726797 ChIP-Seq SW620 Human | KLF5        |
| SEMA3C   | Enrichr TF Perturbations followed by expression: KLF5 20726797 ChIP-Seq SW620 Human | KLF5        |
| ATP2A3   | Enrichr TF Perturbations followed by expression: KLF5 20726797 ChIP-Seq SW620 Human | KLF5        |
| HSD17B14 | Enrichr TF Perturbations followed by expression: KLF5 20726797 ChIP-Seq SW620 Human | KLF5        |
| CLCN2    | Enrichr TF Perturbations followed by expression: KLF5 20726797 ChIP-Seq SW620 Human | KLF5        |
| TPRN     | Enrichr TF Perturbations followed by expression: KLF5 20726797 ChIP-Seq SW620 Human | KLF5        |
| PTPRZ1   | Enrichr TF Perturbations followed by expression: KLF5 20726797 ChIP-Seq SW620 Human | KLF5        |
| NT5DC3   | Enrichr TF Perturbations followed by expression: KLF5 20726797 ChIP-Seq SW620 Human | KLF5        |
| VSIG1    | Enrichr TF Perturbations followed by expression: KLF5 20726797 ChIP-Seq SW620 Human | KLF5        |
| NOS1     | Enrichr TF Perturbations followed by expression: KLF5 20726797 ChIP-Seq SW620 Human | KLF5        |
| DLGAP1   | SOX2-KLF5 coregulated genes from PMID: 33972779                                     | SOX2 + KLF5 |
| SLC35E4  | SOX2-KLF5 coregulated genes from PMID: 33972779                                     | SOX2 + KLF5 |
| USP12    | SOX2-KLF5 coregulated genes from PMID: 33972779                                     | SOX2 + KLF5 |
| CARD10   | SOX2-KLF5 coregulated genes from PMID: 33972779                                     | SOX2 + KLF5 |
| KLF5     | SOX2-KLF5 coregulated genes from PMID: 33972779                                     | SOX2 + KLF5 |
| CUBN     | SOX2-KLF5 coregulated genes from PMID: 33972779                                     | SOX2 + KLF5 |
| HS3ST1   | SOX2-KLF5 coregulated genes from PMID: 33972779                                     | SOX2 + KLF5 |
| TMEM47   | SOX2-KLF5 coregulated genes from PMID: 33972779                                     | SOX2 + KLF5 |
| RUNX1    | SOX2-KLF5 coregulated genes from PMID: 33972779                                     | SOX2 + KLF5 |
| JAG1     | SOX2-KLF5 coregulated genes from PMID: 33972779                                     | SOX2 + KLF5 |
| PLCB1    | SOX2-KLF5 coregulated genes from PMID: 33972779                                     | SOX2 + KLF5 |
| PCDH17   | SOX2-KLF5 coregulated genes from PMID: 33972779                                     | SOX2 + KLF5 |
| KCTD1    | SOX2-KLF5 coregulated genes from PMID: 33972779                                     | SOX2 + KLF5 |
| DSG3     | SOX2-KLF5 coregulated genes from PMID: 33972779                                     | SOX2 + KLF5 |
| BMP2     | SOX2-KLF5 coregulated genes from PMID: 33972779                                     | SOX2 + KLF5 |
| PTGER2   | SOX2-KLF5 coregulated genes from PMID: 33972779                                     | SOX2 + KLF5 |
| SLC5A3   | SOX2-KLF5 coregulated genes from PMID: 33972779                                     | SOX2 + KLF5 |
| AKAP6    | SOX2-KLF5 coregulated genes from PMID: 33972779                                     | SOX2 + KLF5 |
| SH3GL2   | SOX2-KLF5 coregulated genes from PMID: 33972779                                     | SOX2 + KLF5 |
| TTC39C   | SOX2-KLF5 coregulated genes from PMID: 33972779                                     | SOX2 + KLF5 |
| NRIP1    | SOX2-KLF5 coregulated genes from PMID: 33972779                                     | SOX2 + KLF5 |
| OClAD2   | SOX2-KLF5 coregulated genes from PMID: 33972779                                     | SOX2 + KLF5 |

|          |                                                 |             |
|----------|-------------------------------------------------|-------------|
| KIAA1328 | SOX2-KLF5 coregulated genes from PMID: 33972779 | SOX2 + KLF! |
| ETS2     | SOX2-KLF5 coregulated genes from PMID: 33972779 | SOX2 + KLF! |
| SLC1A1   | SOX2-KLF5 coregulated genes from PMID: 33972779 | SOX2 + KLF! |
| LMO7     | SOX2-KLF5 coregulated genes from PMID: 33972779 | SOX2 + KLF! |
| BTG3     | SOX2-KLF5 coregulated genes from PMID: 33972779 | SOX2 + KLF! |
| DACH1    | SOX2-KLF5 coregulated genes from PMID: 33972779 | SOX2 + KLF! |
| MIPEP    | SOX2-KLF5 coregulated genes from PMID: 33972779 | SOX2 + KLF! |
| FERMT2   | SOX2-KLF5 coregulated genes from PMID: 33972779 | SOX2 + KLF! |
| SLIT2    | SOX2-KLF5 coregulated genes from PMID: 33972779 | SOX2 + KLF! |
| MAPRE2   | SOX2-KLF5 coregulated genes from PMID: 33972779 | SOX2 + KLF! |
| FUNDC1   | SOX2-KLF5 coregulated genes from PMID: 33972779 | SOX2 + KLF! |
| NFATC2   | SOX2-KLF5 coregulated genes from PMID: 33972779 | SOX2 + KLF! |
| TXNDC16  | SOX2-KLF5 coregulated genes from PMID: 33972779 | SOX2 + KLF! |
| ALG13    | SOX2-KLF5 coregulated genes from PMID: 33972779 | SOX2 + KLF! |
| RAB27B   | SOX2-KLF5 coregulated genes from PMID: 33972779 | SOX2 + KLF! |
| SPATA13  | SOX2-KLF5 coregulated genes from PMID: 33972779 | SOX2 + KLF! |
| NOVA1    | SOX2-KLF5 coregulated genes from PMID: 33972779 | SOX2 + KLF! |
| BACE2    | SOX2-KLF5 coregulated genes from PMID: 33972779 | SOX2 + KLF! |
| CYYR1    | SOX2-KLF5 coregulated genes from PMID: 33972779 | SOX2 + KLF! |
| FUT8     | SOX2-KLF5 coregulated genes from PMID: 33972779 | SOX2 + KLF! |
| TRMT2B   | SOX2-KLF5 coregulated genes from PMID: 33972779 | SOX2 + KLF! |
| SIK1B    | SOX2-KLF5 coregulated genes from PMID: 33972779 | SOX2 + KLF! |
| SIK1     | SOX2-KLF5 coregulated genes from PMID: 33972779 | SOX2 + KLF! |
| CNTLN    | SOX2-KLF5 coregulated genes from PMID: 33972779 | SOX2 + KLF! |
| LINGO2   | SOX2-KLF5 coregulated genes from PMID: 33972779 | SOX2 + KLF! |
| APBB2    | SOX2-KLF5 coregulated genes from PMID: 33972779 | SOX2 + KLF! |
| SERPINB2 | SOX2-KLF5 coregulated genes from PMID: 33972779 | SOX2 + KLF! |
| SHROOM2  | SOX2-KLF5 coregulated genes from PMID: 33972779 | SOX2 + KLF! |
| GNA14    | SOX2-KLF5 coregulated genes from PMID: 33972779 | SOX2 + KLF! |
| TULP3    | SOX2-KLF5 coregulated genes from PMID: 33972779 | SOX2 + KLF! |
| VOPP1    | SOX2-KLF5 coregulated genes from PMID: 33972779 | SOX2 + KLF! |
| DOCK11   | SOX2-KLF5 coregulated genes from PMID: 33972779 | SOX2 + KLF! |
| SETBP1   | SOX2-KLF5 coregulated genes from PMID: 33972779 | SOX2 + KLF! |
| GCNT3    | SOX2-KLF5 coregulated genes from PMID: 33972779 | SOX2 + KLF! |
| OSBPL3   | SOX2-KLF5 coregulated genes from PMID: 33972779 | SOX2 + KLF! |
| ANXA11   | SOX2-KLF5 coregulated genes from PMID: 33972779 | SOX2 + KLF! |
| GREB1L   | SOX2-KLF5 coregulated genes from PMID: 33972779 | SOX2 + KLF! |
| KLF3     | SOX2-KLF5 coregulated genes from PMID: 33972779 | SOX2 + KLF! |
| RSU1     | SOX2-KLF5 coregulated genes from PMID: 33972779 | SOX2 + KLF! |
| ATRNL1   | SOX2-KLF5 coregulated genes from PMID: 33972779 | SOX2 + KLF! |
| B4GALNT3 | SOX2-KLF5 coregulated genes from PMID: 33972779 | SOX2 + KLF! |
| MLLT3    | SOX2-KLF5 coregulated genes from PMID: 33972779 | SOX2 + KLF! |
| UGT8     | SOX2-KLF5 coregulated genes from PMID: 33972779 | SOX2 + KLF! |
| SHROOM3  | SOX2-KLF5 coregulated genes from PMID: 33972779 | SOX2 + KLF! |
| TMTC1    | SOX2-KLF5 coregulated genes from PMID: 33972779 | SOX2 + KLF! |
| DCLK2    | SOX2-KLF5 coregulated genes from PMID: 33972779 | SOX2 + KLF! |
| DUSP14   | SOX2-KLF5 coregulated genes from PMID: 33972779 | SOX2 + KLF! |
| SAMD4A   | SOX2-KLF5 coregulated genes from PMID: 33972779 | SOX2 + KLF! |
| NDUFA4   | SOX2-KLF5 coregulated genes from PMID: 33972779 | SOX2 + KLF! |
| TGFBR1   | SOX2-KLF5 coregulated genes from PMID: 33972779 | SOX2 + KLF! |
| APLN     | SOX2-KLF5 coregulated genes from PMID: 33972779 | SOX2 + KLF! |
| CALCB    | SOX2-KLF5 coregulated genes from PMID: 33972779 | SOX2 + KLF! |
| LMTK2    | SOX2-KLF5 coregulated genes from PMID: 33972779 | SOX2 + KLF! |
| FMN1     | SOX2-KLF5 coregulated genes from PMID: 33972779 | SOX2 + KLF! |
| TNS4     | SOX2-KLF5 coregulated genes from PMID: 33972779 | SOX2 + KLF! |
| TNFAIP2  | SOX2-KLF5 coregulated genes from PMID: 33972779 | SOX2 + KLF! |
| MOXD1    | SOX2-KLF5 coregulated genes from PMID: 33972779 | SOX2 + KLF! |
| MACROD2  | SOX2-KLF5 coregulated genes from PMID: 33972779 | SOX2 + KLF! |
| LNX1     | SOX2-KLF5 coregulated genes from PMID: 33972779 | SOX2 + KLF! |

|           |                                                 |             |
|-----------|-------------------------------------------------|-------------|
| ETV1      | SOX2-KLF5 coregulated genes from PMID: 33972779 | SOX2 + KLF! |
| CCNG2     | SOX2-KLF5 coregulated genes from PMID: 33972779 | SOX2 + KLF! |
| ST8SIA6   | SOX2-KLF5 coregulated genes from PMID: 33972779 | SOX2 + KLF! |
| RNF150    | SOX2-KLF5 coregulated genes from PMID: 33972779 | SOX2 + KLF! |
| STARD13   | SOX2-KLF5 coregulated genes from PMID: 33972779 | SOX2 + KLF! |
| IPMK      | SOX2-KLF5 coregulated genes from PMID: 33972779 | SOX2 + KLF! |
| NCOA7     | SOX2-KLF5 coregulated genes from PMID: 33972779 | SOX2 + KLF! |
| ATP8B4    | SOX2-KLF5 coregulated genes from PMID: 33972779 | SOX2 + KLF! |
| PLIN2     | SOX2-KLF5 coregulated genes from PMID: 33972779 | SOX2 + KLF! |
| AHNAK     | SOX2-KLF5 coregulated genes from PMID: 33972779 | SOX2 + KLF! |
| RAB11FIP2 | SOX2-KLF5 coregulated genes from PMID: 33972779 | SOX2 + KLF! |
| STK38     | SOX2-KLF5 coregulated genes from PMID: 33972779 | SOX2 + KLF! |
| ARMC2     | SOX2-KLF5 coregulated genes from PMID: 33972779 | SOX2 + KLF! |
| AVP11     | SOX2-KLF5 coregulated genes from PMID: 33972779 | SOX2 + KLF! |
| TNIP3     | SOX2-KLF5 coregulated genes from PMID: 33972779 | SOX2 + KLF! |
| MYO10     | SOX2-KLF5 coregulated genes from PMID: 33972779 | SOX2 + KLF! |
| EPDR1     | SOX2-KLF5 coregulated genes from PMID: 33972779 | SOX2 + KLF! |
| RASSF6    | SOX2-KLF5 coregulated genes from PMID: 33972779 | SOX2 + KLF! |
| BMP6      | SOX2-KLF5 coregulated genes from PMID: 33972779 | SOX2 + KLF! |
| RUNX2     | SOX2-KLF5 coregulated genes from PMID: 33972779 | SOX2 + KLF! |
| PAPPA     | SOX2-KLF5 coregulated genes from PMID: 33972779 | SOX2 + KLF! |
| FOXF2     | SOX2-KLF5 coregulated genes from PMID: 33972779 | SOX2 + KLF! |
| APCDD1    | SOX2-KLF5 coregulated genes from PMID: 33972779 | SOX2 + KLF! |
| IL15      | SOX2-KLF5 coregulated genes from PMID: 33972779 | SOX2 + KLF! |
| FAM171A1  | SOX2-KLF5 coregulated genes from PMID: 33972779 | SOX2 + KLF! |
| GRID2     | SOX2-KLF5 coregulated genes from PMID: 33972779 | SOX2 + KLF! |
| PCDH7     | SOX2-KLF5 coregulated genes from PMID: 33972779 | SOX2 + KLF! |
| FARP1     | SOX2-KLF5 coregulated genes from PMID: 33972779 | SOX2 + KLF! |
| TMPRSS11D | SOX2-KLF5 coregulated genes from PMID: 33972779 | SOX2 + KLF! |
| XPNPEP2   | SOX2-KLF5 coregulated genes from PMID: 33972779 | SOX2 + KLF! |
| CTBP2     | SOX2-KLF5 coregulated genes from PMID: 33972779 | SOX2 + KLF! |
| SUSD1     | SOX2-KLF5 coregulated genes from PMID: 33972779 | SOX2 + KLF! |
| ITGB8     | SOX2-KLF5 coregulated genes from PMID: 33972779 | SOX2 + KLF! |
| MICAL3    | SOX2-KLF5 coregulated genes from PMID: 33972779 | SOX2 + KLF! |
| BCAT1     | SOX2-KLF5 coregulated genes from PMID: 33972779 | SOX2 + KLF! |
| MYOF      | SOX2-KLF5 coregulated genes from PMID: 33972779 | SOX2 + KLF! |
| SDCBP2    | SOX2-KLF5 coregulated genes from PMID: 33972779 | SOX2 + KLF! |
| MARCKS    | SOX2-KLF5 coregulated genes from PMID: 33972779 | SOX2 + KLF! |
| PC        | SOX2-KLF5 coregulated genes from PMID: 33972779 | SOX2 + KLF! |
| PKIB      | SOX2-KLF5 coregulated genes from PMID: 33972779 | SOX2 + KLF! |
| ATP8B1    | SOX2-KLF5 coregulated genes from PMID: 33972779 | SOX2 + KLF! |
| APBB1P    | SOX2-KLF5 coregulated genes from PMID: 33972779 | SOX2 + KLF! |
| LAMA3     | SOX2-KLF5 coregulated genes from PMID: 33972779 | SOX2 + KLF! |
| TSPAN14   | SOX2-KLF5 coregulated genes from PMID: 33972779 | SOX2 + KLF! |
| BACH2     | SOX2-KLF5 coregulated genes from PMID: 33972779 | SOX2 + KLF! |
| MKX       | SOX2-KLF5 coregulated genes from PMID: 33972779 | SOX2 + KLF! |
| RRP12     | SOX2-KLF5 coregulated genes from PMID: 33972779 | SOX2 + KLF! |
| SULT1B1   | SOX2-KLF5 coregulated genes from PMID: 33972779 | SOX2 + KLF! |
| PIM1      | SOX2-KLF5 coregulated genes from PMID: 33972779 | SOX2 + KLF! |
| AQP11     | SOX2-KLF5 coregulated genes from PMID: 33972779 | SOX2 + KLF! |
| ZNF395    | SOX2-KLF5 coregulated genes from PMID: 33972779 | SOX2 + KLF! |
| DIRAS2    | SOX2-KLF5 coregulated genes from PMID: 33972779 | SOX2 + KLF! |
| RNF24     | SOX2-KLF5 coregulated genes from PMID: 33972779 | SOX2 + KLF! |
| EDN1      | SOX2-KLF5 coregulated genes from PMID: 33972779 | SOX2 + KLF! |
| SH3RF1    | SOX2-KLF5 coregulated genes from PMID: 33972779 | SOX2 + KLF! |
| FNBP1     | SOX2-KLF5 coregulated genes from PMID: 33972779 | SOX2 + KLF! |
| OPHN1     | SOX2-KLF5 coregulated genes from PMID: 33972779 | SOX2 + KLF! |
| AGR3      | SOX2-KLF5 coregulated genes from PMID: 33972779 | SOX2 + KLF! |
| HTRA1     | SOX2-KLF5 coregulated genes from PMID: 33972779 | SOX2 + KLF! |

|           |                                                 |             |
|-----------|-------------------------------------------------|-------------|
| GFRA2     | SOX2-KLF5 coregulated genes from PMID: 33972779 | SOX2 + KLF! |
| TNC       | SOX2-KLF5 coregulated genes from PMID: 33972779 | SOX2 + KLF! |
| CTS2      | SOX2-KLF5 coregulated genes from PMID: 33972779 | SOX2 + KLF! |
| TSPAN5    | SOX2-KLF5 coregulated genes from PMID: 33972779 | SOX2 + KLF! |
| SERPINB5  | SOX2-KLF5 coregulated genes from PMID: 33972779 | SOX2 + KLF! |
| LPCAT1    | SOX2-KLF5 coregulated genes from PMID: 33972779 | SOX2 + KLF! |
| DCLK1     | SOX2-KLF5 coregulated genes from PMID: 33972779 | SOX2 + KLF! |
| PPP3CA    | SOX2-KLF5 coregulated genes from PMID: 33972779 | SOX2 + KLF! |
| SLC7A11   | SOX2-KLF5 coregulated genes from PMID: 33972779 | SOX2 + KLF! |
| TLE1      | SOX2-KLF5 coregulated genes from PMID: 33972779 | SOX2 + KLF! |
| ANK3      | SOX2-KLF5 coregulated genes from PMID: 33972779 | SOX2 + KLF! |
| PIP5K1B   | SOX2-KLF5 coregulated genes from PMID: 33972779 | SOX2 + KLF! |
| GRIK1     | SOX2-KLF5 coregulated genes from PMID: 33972779 | SOX2 + KLF! |
| TADA2A    | SOX2-KLF5 coregulated genes from PMID: 33972779 | SOX2 + KLF! |
| PARM1     | SOX2-KLF5 coregulated genes from PMID: 33972779 | SOX2 + KLF! |
| PRRG4     | SOX2-KLF5 coregulated genes from PMID: 33972779 | SOX2 + KLF! |
| SOD3      | SOX2-KLF5 coregulated genes from PMID: 33972779 | SOX2 + KLF! |
| FAM83B    | SOX2-KLF5 coregulated genes from PMID: 33972779 | SOX2 + KLF! |
| FAM53B    | SOX2-KLF5 coregulated genes from PMID: 33972779 | SOX2 + KLF! |
| RAB11FIP1 | SOX2-KLF5 coregulated genes from PMID: 33972779 | SOX2 + KLF! |
| CYTH3     | SOX2-KLF5 coregulated genes from PMID: 33972779 | SOX2 + KLF! |
| ENKUR     | SOX2-KLF5 coregulated genes from PMID: 33972779 | SOX2 + KLF! |
| NRP1      | SOX2-KLF5 coregulated genes from PMID: 33972779 | SOX2 + KLF! |
| OSBPL2    | SOX2-KLF5 coregulated genes from PMID: 33972779 | SOX2 + KLF! |
| SEMA5A    | SOX2-KLF5 coregulated genes from PMID: 33972779 | SOX2 + KLF! |
| RCBTB2    | SOX2-KLF5 coregulated genes from PMID: 33972779 | SOX2 + KLF! |
| FOXQ1     | SOX2-KLF5 coregulated genes from PMID: 33972779 | SOX2 + KLF! |
| RAP1GAP2  | SOX2-KLF5 coregulated genes from PMID: 33972779 | SOX2 + KLF! |
| ARL4A     | SOX2-KLF5 coregulated genes from PMID: 33972779 | SOX2 + KLF! |
| KLF4      | SOX2-KLF5 coregulated genes from PMID: 33972779 | SOX2 + KLF! |
| CHST3     | SOX2-KLF5 coregulated genes from PMID: 33972779 | SOX2 + KLF! |
| SLC16A7   | SOX2-KLF5 coregulated genes from PMID: 33972779 | SOX2 + KLF! |
| GPR158    | SOX2-KLF5 coregulated genes from PMID: 33972779 | SOX2 + KLF! |
| ARHGAP10  | SOX2-KLF5 coregulated genes from PMID: 33972779 | SOX2 + KLF! |
| ABCC4     | SOX2-KLF5 coregulated genes from PMID: 33972779 | SOX2 + KLF! |
| ZFAND5    | SOX2-KLF5 coregulated genes from PMID: 33972779 | SOX2 + KLF! |
| RIN2      | SOX2-KLF5 coregulated genes from PMID: 33972779 | SOX2 + KLF! |
| DSC3      | SOX2-KLF5 coregulated genes from PMID: 33972779 | SOX2 + KLF! |
| SOX21     | SOX2-KLF5 coregulated genes from PMID: 33972779 | SOX2 + KLF! |
| FRAT2     | SOX2-KLF5 coregulated genes from PMID: 33972779 | SOX2 + KLF! |
| ANXA1     | SOX2-KLF5 coregulated genes from PMID: 33972779 | SOX2 + KLF! |
| FCHSD2    | SOX2-KLF5 coregulated genes from PMID: 33972779 | SOX2 + KLF! |
| TMPRSS11E | SOX2-KLF5 coregulated genes from PMID: 33972779 | SOX2 + KLF! |
| SLITRK6   | SOX2-KLF5 coregulated genes from PMID: 33972779 | SOX2 + KLF! |
| PALLD     | SOX2-KLF5 coregulated genes from PMID: 33972779 | SOX2 + KLF! |
| ZNF451    | SOX2-KLF5 coregulated genes from PMID: 33972779 | SOX2 + KLF! |
| PDE1C     | SOX2-KLF5 coregulated genes from PMID: 33972779 | SOX2 + KLF! |
| EFNB2     | SOX2-KLF5 coregulated genes from PMID: 33972779 | SOX2 + KLF! |
| COL15A1   | SOX2-KLF5 coregulated genes from PMID: 33972779 | SOX2 + KLF! |
| KLHL32    | SOX2-KLF5 coregulated genes from PMID: 33972779 | SOX2 + KLF! |
| ASAH1     | SOX2-KLF5 coregulated genes from PMID: 33972779 | SOX2 + KLF! |
| CHIC1     | SOX2-KLF5 coregulated genes from PMID: 33972779 | SOX2 + KLF! |
| JUP       | SOX2-KLF5 coregulated genes from PMID: 33972779 | SOX2 + KLF! |
| NDFIP2    | SOX2-KLF5 coregulated genes from PMID: 33972779 | SOX2 + KLF! |
| POLM      | SOX2-KLF5 coregulated genes from PMID: 33972779 | SOX2 + KLF! |
| TMEM211   | SOX2-KLF5 coregulated genes from PMID: 33972779 | SOX2 + KLF! |
| SLC1A4    | SOX2-KLF5 coregulated genes from PMID: 33972779 | SOX2 + KLF! |
| TSPAN8    | SOX2-KLF5 coregulated genes from PMID: 33972779 | SOX2 + KLF! |
| TRIP10    | SOX2-KLF5 coregulated genes from PMID: 33972779 | SOX2 + KLF! |

|          |                                                 |             |
|----------|-------------------------------------------------|-------------|
| PCDH18   | SOX2-KLF5 coregulated genes from PMID: 33972779 | SOX2 + KLF! |
| PPP1CB   | SOX2-KLF5 coregulated genes from PMID: 33972779 | SOX2 + KLF! |
| CA10     | SOX2-KLF5 coregulated genes from PMID: 33972779 | SOX2 + KLF! |
| SYNE2    | SOX2-KLF5 coregulated genes from PMID: 33972779 | SOX2 + KLF! |
| CECR2    | SOX2-KLF5 coregulated genes from PMID: 33972779 | SOX2 + KLF! |
| DOCK9    | SOX2-KLF5 coregulated genes from PMID: 33972779 | SOX2 + KLF! |
| SULF1    | SOX2-KLF5 coregulated genes from PMID: 33972779 | SOX2 + KLF! |
| WDR72    | SOX2-KLF5 coregulated genes from PMID: 33972779 | SOX2 + KLF! |
| RAP2A    | SOX2-KLF5 coregulated genes from PMID: 33972779 | SOX2 + KLF! |
| KIRREL3  | SOX2-KLF5 coregulated genes from PMID: 33972779 | SOX2 + KLF! |
| EXOC4    | SOX2-KLF5 coregulated genes from PMID: 33972779 | SOX2 + KLF! |
| LY75     | SOX2-KLF5 coregulated genes from PMID: 33972779 | SOX2 + KLF! |
| LAMA4    | SOX2-KLF5 coregulated genes from PMID: 33972779 | SOX2 + KLF! |
| IGSF11   | SOX2-KLF5 coregulated genes from PMID: 33972779 | SOX2 + KLF! |
| FRAS1    | SOX2-KLF5 coregulated genes from PMID: 33972779 | SOX2 + KLF! |
| DENND1A  | SOX2-KLF5 coregulated genes from PMID: 33972779 | SOX2 + KLF! |
| MAPK10   | SOX2-KLF5 coregulated genes from PMID: 33972779 | SOX2 + KLF! |
| TGM3     | SOX2-KLF5 coregulated genes from PMID: 33972779 | SOX2 + KLF! |
| TMPRSS4  | SOX2-KLF5 coregulated genes from PMID: 33972779 | SOX2 + KLF! |
| SNRPN    | SOX2-KLF5 coregulated genes from PMID: 33972779 | SOX2 + KLF! |
| DPYSL3   | SOX2-KLF5 coregulated genes from PMID: 33972779 | SOX2 + KLF! |
| C6orf136 | SOX2-KLF5 coregulated genes from PMID: 33972779 | SOX2 + KLF! |
| BNC2     | SOX2-KLF5 coregulated genes from PMID: 33972779 | SOX2 + KLF! |
| TANK     | SOX2-KLF5 coregulated genes from PMID: 33972779 | SOX2 + KLF! |
| TANC1    | SOX2-KLF5 coregulated genes from PMID: 33972779 | SOX2 + KLF! |
| NOL10    | SOX2-KLF5 coregulated genes from PMID: 33972779 | SOX2 + KLF! |
| AKAP12   | SOX2-KLF5 coregulated genes from PMID: 33972779 | SOX2 + KLF! |
| SEMA6D   | SOX2-KLF5 coregulated genes from PMID: 33972779 | SOX2 + KLF! |
| RIMS2    | SOX2-KLF5 coregulated genes from PMID: 33972779 | SOX2 + KLF! |
| GDNF     | SOX2-KLF5 coregulated genes from PMID: 33972779 | SOX2 + KLF! |
| FIGN     | SOX2-KLF5 coregulated genes from PMID: 33972779 | SOX2 + KLF! |
| WFDC1    | SOX2-KLF5 coregulated genes from PMID: 33972779 | SOX2 + KLF! |
| SIL1     | SOX2-KLF5 coregulated genes from PMID: 33972779 | SOX2 + KLF! |
| BARX2    | SOX2-KLF5 coregulated genes from PMID: 33972779 | SOX2 + KLF! |
| WNT7A    | SOX2-KLF5 coregulated genes from PMID: 33972779 | SOX2 + KLF! |
| MACC1    | SOX2-KLF5 coregulated genes from PMID: 33972779 | SOX2 + KLF! |
| CITED2   | SOX2-KLF5 coregulated genes from PMID: 33972779 | SOX2 + KLF! |
| FBXO16   | SOX2-KLF5 coregulated genes from PMID: 33972779 | SOX2 + KLF! |
| TGFBI    | SOX2-KLF5 coregulated genes from PMID: 33972779 | SOX2 + KLF! |
| ASB1     | SOX2-KLF5 coregulated genes from PMID: 33972779 | SOX2 + KLF! |
| ATP8A1   | SOX2-KLF5 coregulated genes from PMID: 33972779 | SOX2 + KLF! |
| CCDC85A  | SOX2-KLF5 coregulated genes from PMID: 33972779 | SOX2 + KLF! |
| OSGIN1   | SOX2-KLF5 coregulated genes from PMID: 33972779 | SOX2 + KLF! |
| WNK2     | SOX2-KLF5 coregulated genes from PMID: 33972779 | SOX2 + KLF! |
| THUMPD2  | SOX2-KLF5 coregulated genes from PMID: 33972779 | SOX2 + KLF! |
| SLC8A1   | SOX2-KLF5 coregulated genes from PMID: 33972779 | SOX2 + KLF! |
| N4BP1    | SOX2-KLF5 coregulated genes from PMID: 33972779 | SOX2 + KLF! |
| PRKCH    | SOX2-KLF5 coregulated genes from PMID: 33972779 | SOX2 + KLF! |
| PLS3     | SOX2-KLF5 coregulated genes from PMID: 33972779 | SOX2 + KLF! |
| PPIF     | SOX2-KLF5 coregulated genes from PMID: 33972779 | SOX2 + KLF! |
| AIG1     | SOX2-KLF5 coregulated genes from PMID: 33972779 | SOX2 + KLF! |
| VCL      | SOX2-KLF5 coregulated genes from PMID: 33972779 | SOX2 + KLF! |
| NRXN3    | SOX2-KLF5 coregulated genes from PMID: 33972779 | SOX2 + KLF! |
| GSS      | SOX2-KLF5 coregulated genes from PMID: 33972779 | SOX2 + KLF! |
| ARHGAP26 | SOX2-KLF5 coregulated genes from PMID: 33972779 | SOX2 + KLF! |
| RPS6KA3  | SOX2-KLF5 coregulated genes from PMID: 33972779 | SOX2 + KLF! |
| SLC16A9  | SOX2-KLF5 coregulated genes from PMID: 33972779 | SOX2 + KLF! |
| RGS9     | SOX2-KLF5 coregulated genes from PMID: 33972779 | SOX2 + KLF! |
| RERE     | SOX2-KLF5 coregulated genes from PMID: 33972779 | SOX2 + KLF! |



|          |                                                 |             |
|----------|-------------------------------------------------|-------------|
| FBLN2    | SOX2-KLF5 coregulated genes from PMID: 33972779 | SOX2 + KLF! |
| MEIS1    | SOX2-KLF5 coregulated genes from PMID: 33972779 | SOX2 + KLF! |
| LY6E     | SOX2-KLF5 coregulated genes from PMID: 33972779 | SOX2 + KLF! |
| COL8A1   | SOX2-KLF5 coregulated genes from PMID: 33972779 | SOX2 + KLF! |
| KCMF1    | SOX2-KLF5 coregulated genes from PMID: 33972779 | SOX2 + KLF! |
| PARP12   | SOX2-KLF5 coregulated genes from PMID: 33972779 | SOX2 + KLF! |
| SLCO5A1  | SOX2-KLF5 coregulated genes from PMID: 33972779 | SOX2 + KLF! |
| SMPD3    | SOX2-KLF5 coregulated genes from PMID: 33972779 | SOX2 + KLF! |
| SLC4A4   | SOX2-KLF5 coregulated genes from PMID: 33972779 | SOX2 + KLF! |
| FHL2     | SOX2-KLF5 coregulated genes from PMID: 33972779 | SOX2 + KLF! |
| SLC44A3  | SOX2-KLF5 coregulated genes from PMID: 33972779 | SOX2 + KLF! |
| SYN2     | SOX2-KLF5 coregulated genes from PMID: 33972779 | SOX2 + KLF! |
| GLI3     | SOX2-KLF5 coregulated genes from PMID: 33972779 | SOX2 + KLF! |
| TRIM24   | SOX2-KLF5 coregulated genes from PMID: 33972779 | SOX2 + KLF! |
| ENPP2    | SOX2-KLF5 coregulated genes from PMID: 33972779 | SOX2 + KLF! |
| RFX3     | SOX2-KLF5 coregulated genes from PMID: 33972779 | SOX2 + KLF! |
| SCARA5   | SOX2-KLF5 coregulated genes from PMID: 33972779 | SOX2 + KLF! |
| EMB      | SOX2-KLF5 coregulated genes from PMID: 33972779 | SOX2 + KLF! |
| MMP2     | SOX2-KLF5 coregulated genes from PMID: 33972779 | SOX2 + KLF! |
| PGM2L1   | SOX2-KLF5 coregulated genes from PMID: 33972779 | SOX2 + KLF! |
| MGAT4A   | SOX2-KLF5 coregulated genes from PMID: 33972779 | SOX2 + KLF! |
| FSD1L    | SOX2-KLF5 coregulated genes from PMID: 33972779 | SOX2 + KLF! |
| PLEKHH1  | SOX2-KLF5 coregulated genes from PMID: 33972779 | SOX2 + KLF! |
| FLRT2    | SOX2-KLF5 coregulated genes from PMID: 33972779 | SOX2 + KLF! |
| AMOT     | SOX2-KLF5 coregulated genes from PMID: 33972779 | SOX2 + KLF! |
| FAM81A   | SOX2-KLF5 coregulated genes from PMID: 33972779 | SOX2 + KLF! |
| DNMBP    | SOX2-KLF5 coregulated genes from PMID: 33972779 | SOX2 + KLF! |
| EPHB6    | SOX2-KLF5 coregulated genes from PMID: 33972779 | SOX2 + KLF! |
| STXBP1   | SOX2-KLF5 coregulated genes from PMID: 33972779 | SOX2 + KLF! |
| NEBL     | SOX2-KLF5 coregulated genes from PMID: 33972779 | SOX2 + KLF! |
| IGF2R    | SOX2-KLF5 coregulated genes from PMID: 33972779 | SOX2 + KLF! |
| ZFH3     | SOX2-KLF5 coregulated genes from PMID: 33972779 | SOX2 + KLF! |
| TLE4     | SOX2-KLF5 coregulated genes from PMID: 33972779 | SOX2 + KLF! |
| GJB5     | SOX2-KLF5 coregulated genes from PMID: 33972779 | SOX2 + KLF! |
| KLF12    | SOX2-KLF5 coregulated genes from PMID: 33972779 | SOX2 + KLF! |
| RAI14    | SOX2-KLF5 coregulated genes from PMID: 33972779 | SOX2 + KLF! |
| PBRM1    | SOX2-KLF5 coregulated genes from PMID: 33972779 | SOX2 + KLF! |
| ILVBL    | SOX2-KLF5 coregulated genes from PMID: 33972779 | SOX2 + KLF! |
| PCTP     | SOX2-KLF5 coregulated genes from PMID: 33972779 | SOX2 + KLF! |
| SOX5     | SOX2-KLF5 coregulated genes from PMID: 33972779 | SOX2 + KLF! |
| NCOR2    | SOX2-KLF5 coregulated genes from PMID: 33972779 | SOX2 + KLF! |
| RAPGEF5  | SOX2-KLF5 coregulated genes from PMID: 33972779 | SOX2 + KLF! |
| PHACTR4  | SOX2-KLF5 coregulated genes from PMID: 33972779 | SOX2 + KLF! |
| ZNF365   | SOX2-KLF5 coregulated genes from PMID: 33972779 | SOX2 + KLF! |
| ARFGAP3  | SOX2-KLF5 coregulated genes from PMID: 33972779 | SOX2 + KLF! |
| PACS1    | SOX2-KLF5 coregulated genes from PMID: 33972779 | SOX2 + KLF! |
| COL4A6   | SOX2-KLF5 coregulated genes from PMID: 33972779 | SOX2 + KLF! |
| IL20RB   | SOX2-KLF5 coregulated genes from PMID: 33972779 | SOX2 + KLF! |
| MREG     | SOX2-KLF5 coregulated genes from PMID: 33972779 | SOX2 + KLF! |
| TMEM200A | SOX2-KLF5 coregulated genes from PMID: 33972779 | SOX2 + KLF! |
| PKD2     | SOX2-KLF5 coregulated genes from PMID: 33972779 | SOX2 + KLF! |
| SOCS2    | SOX2-KLF5 coregulated genes from PMID: 33972779 | SOX2 + KLF! |
| MYH9     | SOX2-KLF5 coregulated genes from PMID: 33972779 | SOX2 + KLF! |
| ETS1     | SOX2-KLF5 coregulated genes from PMID: 33972779 | SOX2 + KLF! |
| CDK14    | SOX2-KLF5 coregulated genes from PMID: 33972779 | SOX2 + KLF! |
| NFKBIA   | SOX2-KLF5 coregulated genes from PMID: 33972779 | SOX2 + KLF! |
| GUCY1A2  | SOX2-KLF5 coregulated genes from PMID: 33972779 | SOX2 + KLF! |
| DTNBP1   | SOX2-KLF5 coregulated genes from PMID: 33972779 | SOX2 + KLF! |
| MAL2     | SOX2-KLF5 coregulated genes from PMID: 33972779 | SOX2 + KLF! |

|          |                                                 |             |
|----------|-------------------------------------------------|-------------|
| PDZRN3   | SOX2-KLF5 coregulated genes from PMID: 33972779 | SOX2 + KLF! |
| MRAS     | SOX2-KLF5 coregulated genes from PMID: 33972779 | SOX2 + KLF! |
| B3GAT1   | SOX2-KLF5 coregulated genes from PMID: 33972779 | SOX2 + KLF! |
| ADD2     | SOX2-KLF5 coregulated genes from PMID: 33972779 | SOX2 + KLF! |
| SGMS1    | SOX2-KLF5 coregulated genes from PMID: 33972779 | SOX2 + KLF! |
| IL1A     | SOX2-KLF5 coregulated genes from PMID: 33972779 | SOX2 + KLF! |
| RANBP17  | SOX2-KLF5 coregulated genes from PMID: 33972779 | SOX2 + KLF! |
| NUDT4    | SOX2-KLF5 coregulated genes from PMID: 33972779 | SOX2 + KLF! |
| TXNDC12  | SOX2-KLF5 coregulated genes from PMID: 33972779 | SOX2 + KLF! |
| PEBP1    | SOX2-KLF5 coregulated genes from PMID: 33972779 | SOX2 + KLF! |
| TMC1     | SOX2-KLF5 coregulated genes from PMID: 33972779 | SOX2 + KLF! |
| RBMS3    | SOX2-KLF5 coregulated genes from PMID: 33972779 | SOX2 + KLF! |
| LIPT2    | SOX2-KLF5 coregulated genes from PMID: 33972779 | SOX2 + KLF! |
| CDH6     | SOX2-KLF5 coregulated genes from PMID: 33972779 | SOX2 + KLF! |
| FAM3C    | SOX2-KLF5 coregulated genes from PMID: 33972779 | SOX2 + KLF! |
| GHR      | SOX2-KLF5 coregulated genes from PMID: 33972779 | SOX2 + KLF! |
| ALDH3A1  | SOX2-KLF5 coregulated genes from PMID: 33972779 | SOX2 + KLF! |
| EYA1     | SOX2-KLF5 coregulated genes from PMID: 33972779 | SOX2 + KLF! |
| LAMB1    | SOX2-KLF5 coregulated genes from PMID: 33972779 | SOX2 + KLF! |
| CDH11    | SOX2-KLF5 coregulated genes from PMID: 33972779 | SOX2 + KLF! |
| ESYT3    | SOX2-KLF5 coregulated genes from PMID: 33972779 | SOX2 + KLF! |
| BAIAP2L1 | SOX2-KLF5 coregulated genes from PMID: 33972779 | SOX2 + KLF! |
| CCDC88C  | SOX2-KLF5 coregulated genes from PMID: 33972779 | SOX2 + KLF! |
| HMGCLL1  | SOX2-KLF5 coregulated genes from PMID: 33972779 | SOX2 + KLF! |
| CMYA5    | SOX2-KLF5 coregulated genes from PMID: 33972779 | SOX2 + KLF! |
| TOX3     | SOX2-KLF5 coregulated genes from PMID: 33972779 | SOX2 + KLF! |
| HS6ST1   | SOX2-KLF5 coregulated genes from PMID: 33972779 | SOX2 + KLF! |
| MMP16    | SOX2-KLF5 coregulated genes from PMID: 33972779 | SOX2 + KLF! |
| DMD      | SOX2-KLF5 coregulated genes from PMID: 33972779 | SOX2 + KLF! |
| ARID5B   | SOX2-KLF5 coregulated genes from PMID: 33972779 | SOX2 + KLF! |
| SYT17    | SOX2-KLF5 coregulated genes from PMID: 33972779 | SOX2 + KLF! |
| PI15     | SOX2-KLF5 coregulated genes from PMID: 33972779 | SOX2 + KLF! |
| EEA1     | SOX2-KLF5 coregulated genes from PMID: 33972779 | SOX2 + KLF! |
| PRKD1    | SOX2-KLF5 coregulated genes from PMID: 33972779 | SOX2 + KLF! |
| MCC      | SOX2-KLF5 coregulated genes from PMID: 33972779 | SOX2 + KLF! |
| TRIM2    | SOX2-KLF5 coregulated genes from PMID: 33972779 | SOX2 + KLF! |
| B4GALNT4 | SOX2-KLF5 coregulated genes from PMID: 33972779 | SOX2 + KLF! |
| MPPED2   | SOX2-KLF5 coregulated genes from PMID: 33972779 | SOX2 + KLF! |
| GIPC2    | SOX2-KLF5 coregulated genes from PMID: 33972779 | SOX2 + KLF! |
| TEK      | SOX2-KLF5 coregulated genes from PMID: 33972779 | SOX2 + KLF! |
| ROBO2    | SOX2-KLF5 coregulated genes from PMID: 33972779 | SOX2 + KLF! |
| TJP2     | SOX2-KLF5 coregulated genes from PMID: 33972779 | SOX2 + KLF! |
| KCNN2    | SOX2-KLF5 coregulated genes from PMID: 33972779 | SOX2 + KLF! |
| NEGR1    | SOX2-KLF5 coregulated genes from PMID: 33972779 | SOX2 + KLF! |
| GPHN     | SOX2-KLF5 coregulated genes from PMID: 33972779 | SOX2 + KLF! |
| RNF19A   | SOX2-KLF5 coregulated genes from PMID: 33972779 | SOX2 + KLF! |
| FAM181B  | SOX2-KLF5 coregulated genes from PMID: 33972779 | SOX2 + KLF! |
| TM4SF1   | SOX2-KLF5 coregulated genes from PMID: 33972779 | SOX2 + KLF! |
| UGCG     | SOX2-KLF5 coregulated genes from PMID: 33972779 | SOX2 + KLF! |
| ATP10B   | SOX2-KLF5 coregulated genes from PMID: 33972779 | SOX2 + KLF! |
| FKBP5    | SOX2-KLF5 coregulated genes from PMID: 33972779 | SOX2 + KLF! |
| TGM7     | SOX2-KLF5 coregulated genes from PMID: 33972779 | SOX2 + KLF! |
| PLA1A    | SOX2-KLF5 coregulated genes from PMID: 33972779 | SOX2 + KLF! |
| NHLRC2   | SOX2-KLF5 coregulated genes from PMID: 33972779 | SOX2 + KLF! |
| NDUFS4   | SOX2-KLF5 coregulated genes from PMID: 33972779 | SOX2 + KLF! |
| AGPAT4   | SOX2-KLF5 coregulated genes from PMID: 33972779 | SOX2 + KLF! |
| TULP4    | SOX2-KLF5 coregulated genes from PMID: 33972779 | SOX2 + KLF! |
| EHF      | SOX2-KLF5 coregulated genes from PMID: 33972779 | SOX2 + KLF! |
| SLC9A2   | SOX2-KLF5 coregulated genes from PMID: 33972779 | SOX2 + KLF! |

|          |                                                 |             |
|----------|-------------------------------------------------|-------------|
| TNFSF15  | SOX2-KLF5 coregulated genes from PMID: 33972779 | SOX2 + KLF! |
| GRM8     | SOX2-KLF5 coregulated genes from PMID: 33972779 | SOX2 + KLF! |
| NUDT7    | SOX2-KLF5 coregulated genes from PMID: 33972779 | SOX2 + KLF! |
| PARD3    | SOX2-KLF5 coregulated genes from PMID: 33972779 | SOX2 + KLF! |
| SPRY1    | SOX2-KLF5 coregulated genes from PMID: 33972779 | SOX2 + KLF! |
| EPHA3    | SOX2-KLF5 coregulated genes from PMID: 33972779 | SOX2 + KLF! |
| PLB1     | SOX2-KLF5 coregulated genes from PMID: 33972779 | SOX2 + KLF! |
| ANKH     | SOX2-KLF5 coregulated genes from PMID: 33972779 | SOX2 + KLF! |
| DNAJC6   | SOX2-KLF5 coregulated genes from PMID: 33972779 | SOX2 + KLF! |
| VEGFC    | SOX2-KLF5 coregulated genes from PMID: 33972779 | SOX2 + KLF! |
| QKI      | SOX2-KLF5 coregulated genes from PMID: 33972779 | SOX2 + KLF! |
| ADM      | SOX2-KLF5 coregulated genes from PMID: 33972779 | SOX2 + KLF! |
| PODXL    | SOX2-KLF5 coregulated genes from PMID: 33972779 | SOX2 + KLF! |
| PPP4R4   | SOX2-KLF5 coregulated genes from PMID: 33972779 | SOX2 + KLF! |
| EPCAM    | SOX2-KLF5 coregulated genes from PMID: 33972779 | SOX2 + KLF! |
| PTER     | SOX2-KLF5 coregulated genes from PMID: 33972779 | SOX2 + KLF! |
| CEP68    | SOX2-KLF5 coregulated genes from PMID: 33972779 | SOX2 + KLF! |
| CRADD    | SOX2-KLF5 coregulated genes from PMID: 33972779 | SOX2 + KLF! |
| PTGR1    | SOX2-KLF5 coregulated genes from PMID: 33972779 | SOX2 + KLF! |
| EPGN     | SOX2-KLF5 coregulated genes from PMID: 33972779 | SOX2 + KLF! |
| BTG1     | SOX2-KLF5 coregulated genes from PMID: 33972779 | SOX2 + KLF! |
| ARMCX1   | SOX2-KLF5 coregulated genes from PMID: 33972779 | SOX2 + KLF! |
| KLHL8    | SOX2-KLF5 coregulated genes from PMID: 33972779 | SOX2 + KLF! |
| ALDH5A1  | SOX2-KLF5 coregulated genes from PMID: 33972779 | SOX2 + KLF! |
| CAMK4    | SOX2-KLF5 coregulated genes from PMID: 33972779 | SOX2 + KLF! |
| ARG1     | SOX2-KLF5 coregulated genes from PMID: 33972779 | SOX2 + KLF! |
| NEURL1B  | SOX2-KLF5 coregulated genes from PMID: 33972779 | SOX2 + KLF! |
| FAM110C  | SOX2-KLF5 coregulated genes from PMID: 33972779 | SOX2 + KLF! |
| SLC25A25 | SOX2-KLF5 coregulated genes from PMID: 33972779 | SOX2 + KLF! |
| ANKRD6   | SOX2-KLF5 coregulated genes from PMID: 33972779 | SOX2 + KLF! |
| MAP3K8   | SOX2-KLF5 coregulated genes from PMID: 33972779 | SOX2 + KLF! |
| ALCAM    | SOX2-KLF5 coregulated genes from PMID: 33972779 | SOX2 + KLF! |
| JPH1     | SOX2-KLF5 coregulated genes from PMID: 33972779 | SOX2 + KLF! |
| DNAJC21  | SOX2-KLF5 coregulated genes from PMID: 33972779 | SOX2 + KLF! |
| SESTD1   | SOX2-KLF5 coregulated genes from PMID: 33972779 | SOX2 + KLF! |
| SRL      | SOX2-KLF5 coregulated genes from PMID: 33972779 | SOX2 + KLF! |
| ARHGEF12 | SOX2-KLF5 coregulated genes from PMID: 33972779 | SOX2 + KLF! |
| SORBS2   | SOX2-KLF5 coregulated genes from PMID: 33972779 | SOX2 + KLF! |
| EFEMP1   | SOX2-KLF5 coregulated genes from PMID: 33972779 | SOX2 + KLF! |
| MBNL3    | SOX2-KLF5 coregulated genes from PMID: 33972779 | SOX2 + KLF! |
| KHDRBS3  | SOX2-KLF5 coregulated genes from PMID: 33972779 | SOX2 + KLF! |
| MFAP3L   | SOX2-KLF5 coregulated genes from PMID: 33972779 | SOX2 + KLF! |
| MEGF9    | SOX2-KLF5 coregulated genes from PMID: 33972779 | SOX2 + KLF! |
| GLIS3    | SOX2-KLF5 coregulated genes from PMID: 33972779 | SOX2 + KLF! |
| PAIP2B   | SOX2-KLF5 coregulated genes from PMID: 33972779 | SOX2 + KLF! |
| CX3CL1   | SOX2-KLF5 coregulated genes from PMID: 33972779 | SOX2 + KLF! |
| PFN2     | SOX2-KLF5 coregulated genes from PMID: 33972779 | SOX2 + KLF! |
| MBOAT2   | SOX2-KLF5 coregulated genes from PMID: 33972779 | SOX2 + KLF! |
| TBC1D30  | SOX2-KLF5 coregulated genes from PMID: 33972779 | SOX2 + KLF! |
| NUAK2    | SOX2-KLF5 coregulated genes from PMID: 33972779 | SOX2 + KLF! |
| IL6R     | SOX2-KLF5 coregulated genes from PMID: 33972779 | SOX2 + KLF! |
| B3GNT2   | SOX2-KLF5 coregulated genes from PMID: 33972779 | SOX2 + KLF! |
| PBX1     | SOX2-KLF5 coregulated genes from PMID: 33972779 | SOX2 + KLF! |
| TBCA     | SOX2-KLF5 coregulated genes from PMID: 33972779 | SOX2 + KLF! |
| SETD5    | SOX2-KLF5 coregulated genes from PMID: 33972779 | SOX2 + KLF! |
| KLHL29   | SOX2-KLF5 coregulated genes from PMID: 33972779 | SOX2 + KLF! |
| DGKG     | SOX2-KLF5 coregulated genes from PMID: 33972779 | SOX2 + KLF! |
| LITAF    | SOX2-KLF5 coregulated genes from PMID: 33972779 | SOX2 + KLF! |
| ST14     | SOX2-KLF5 coregulated genes from PMID: 33972779 | SOX2 + KLF! |

|          |                                                 |             |
|----------|-------------------------------------------------|-------------|
| RBPJ     | SOX2-KLF5 coregulated genes from PMID: 33972779 | SOX2 + KLF! |
| ADAM12   | SOX2-KLF5 coregulated genes from PMID: 33972779 | SOX2 + KLF! |
| SLC4A3   | SOX2-KLF5 coregulated genes from PMID: 33972779 | SOX2 + KLF! |
| CCDC141  | SOX2-KLF5 coregulated genes from PMID: 33972779 | SOX2 + KLF! |
| IDH2     | SOX2-KLF5 coregulated genes from PMID: 33972779 | SOX2 + KLF! |
| TNRC18   | SOX2-KLF5 coregulated genes from PMID: 33972779 | SOX2 + KLF! |
| CDH13    | SOX2-KLF5 coregulated genes from PMID: 33972779 | SOX2 + KLF! |
| MPZL1    | SOX2-KLF5 coregulated genes from PMID: 33972779 | SOX2 + KLF! |
| TXNRD1   | SOX2-KLF5 coregulated genes from PMID: 33972779 | SOX2 + KLF! |
| TANC2    | SOX2-KLF5 coregulated genes from PMID: 33972779 | SOX2 + KLF! |
| RGS4     | SOX2-KLF5 coregulated genes from PMID: 33972779 | SOX2 + KLF! |
| IL10     | SOX2-KLF5 coregulated genes from PMID: 33972779 | SOX2 + KLF! |
| KRT19    | SOX2-KLF5 coregulated genes from PMID: 33972779 | SOX2 + KLF! |
| ARHGAP18 | SOX2-KLF5 coregulated genes from PMID: 33972779 | SOX2 + KLF! |
| MEGF11   | SOX2-KLF5 coregulated genes from PMID: 33972779 | SOX2 + KLF! |
| KIRREL1  | SOX2-KLF5 coregulated genes from PMID: 33972779 | SOX2 + KLF! |
| SLC13A2  | SOX2-KLF5 coregulated genes from PMID: 33972779 | SOX2 + KLF! |
| ALOX12   | SOX2-KLF5 coregulated genes from PMID: 33972779 | SOX2 + KLF! |
| SHISA6   | SOX2-KLF5 coregulated genes from PMID: 33972779 | SOX2 + KLF! |
| SMOC2    | SOX2-KLF5 coregulated genes from PMID: 33972779 | SOX2 + KLF! |
| NRXN1    | SOX2-KLF5 coregulated genes from PMID: 33972779 | SOX2 + KLF! |
| RGL1     | SOX2-KLF5 coregulated genes from PMID: 33972779 | SOX2 + KLF! |
| SOX6     | SOX2-KLF5 coregulated genes from PMID: 33972779 | SOX2 + KLF! |
| CTNND2   | SOX2-KLF5 coregulated genes from PMID: 33972779 | SOX2 + KLF! |
| BLNK     | SOX2-KLF5 coregulated genes from PMID: 33972779 | SOX2 + KLF! |
| RARRES1  | SOX2-KLF5 coregulated genes from PMID: 33972779 | SOX2 + KLF! |
| NMNAT2   | SOX2-KLF5 coregulated genes from PMID: 33972779 | SOX2 + KLF! |
| PPL      | SOX2-KLF5 coregulated genes from PMID: 33972779 | SOX2 + KLF! |
| CADPS2   | SOX2-KLF5 coregulated genes from PMID: 33972779 | SOX2 + KLF! |
| EFNA5    | SOX2-KLF5 coregulated genes from PMID: 33972779 | SOX2 + KLF! |
| UTRN     | SOX2-KLF5 coregulated genes from PMID: 33972779 | SOX2 + KLF! |
| PKP1     | SOX2-KLF5 coregulated genes from PMID: 33972779 | SOX2 + KLF! |
| KCNJ2    | SOX2-KLF5 coregulated genes from PMID: 33972779 | SOX2 + KLF! |
| NUDT4B   | SOX2-KLF5 coregulated genes from PMID: 33972779 | SOX2 + KLF! |
| ATP1B1   | SOX2-KLF5 coregulated genes from PMID: 33972779 | SOX2 + KLF! |
| FAM43A   | SOX2-KLF5 coregulated genes from PMID: 33972779 | SOX2 + KLF! |
| ADRB1    | SOX2-KLF5 coregulated genes from PMID: 33972779 | SOX2 + KLF! |
| LYPD6B   | SOX2-KLF5 coregulated genes from PMID: 33972779 | SOX2 + KLF! |
| TNK2     | SOX2-KLF5 coregulated genes from PMID: 33972779 | SOX2 + KLF! |
| LY96     | SOX2-KLF5 coregulated genes from PMID: 33972779 | SOX2 + KLF! |
| OTOP1    | SOX2-KLF5 coregulated genes from PMID: 33972779 | SOX2 + KLF! |
| HDAC9    | SOX2-KLF5 coregulated genes from PMID: 33972779 | SOX2 + KLF! |
| IQGAP1   | SOX2-KLF5 coregulated genes from PMID: 33972779 | SOX2 + KLF! |
| PLD1     | SOX2-KLF5 coregulated genes from PMID: 33972779 | SOX2 + KLF! |
| SMPDL3B  | SOX2-KLF5 coregulated genes from PMID: 33972779 | SOX2 + KLF! |
| KCNK1    | SOX2-KLF5 coregulated genes from PMID: 33972779 | SOX2 + KLF! |
| IRAK2    | SOX2-KLF5 coregulated genes from PMID: 33972779 | SOX2 + KLF! |
| TMEM161B | SOX2-KLF5 coregulated genes from PMID: 33972779 | SOX2 + KLF! |
| RC3H1    | SOX2-KLF5 coregulated genes from PMID: 33972779 | SOX2 + KLF! |
| HHAT     | SOX2-KLF5 coregulated genes from PMID: 33972779 | SOX2 + KLF! |
| IRS1     | SOX2-KLF5 coregulated genes from PMID: 33972779 | SOX2 + KLF! |
| CNIH4    | SOX2-KLF5 coregulated genes from PMID: 33972779 | SOX2 + KLF! |
| ITGA6    | SOX2-KLF5 coregulated genes from PMID: 33972779 | SOX2 + KLF! |
| RAB43    | SOX2-KLF5 coregulated genes from PMID: 33972779 | SOX2 + KLF! |
| EPHA7    | SOX2-KLF5 coregulated genes from PMID: 33972779 | SOX2 + KLF! |
| CFTR     | SOX2-KLF5 coregulated genes from PMID: 33972779 | SOX2 + KLF! |
| ADAM9    | SOX2-KLF5 coregulated genes from PMID: 33972779 | SOX2 + KLF! |
| SPRY4    | SOX2-KLF5 coregulated genes from PMID: 33972779 | SOX2 + KLF! |
| ST3GAL3  | SOX2-KLF5 coregulated genes from PMID: 33972779 | SOX2 + KLF! |

|            |                                                 |             |
|------------|-------------------------------------------------|-------------|
| BTG2       | SOX2-KLF5 coregulated genes from PMID: 33972779 | SOX2 + KLF! |
| NFKBIZ     | SOX2-KLF5 coregulated genes from PMID: 33972779 | SOX2 + KLF! |
| PGBD1      | SOX2-KLF5 coregulated genes from PMID: 33972779 | SOX2 + KLF! |
| LPCAT4     | SOX2-KLF5 coregulated genes from PMID: 33972779 | SOX2 + KLF! |
| RFFL       | SOX2-KLF5 coregulated genes from PMID: 33972779 | SOX2 + KLF! |
| NOS1AP     | SOX2-KLF5 coregulated genes from PMID: 33972779 | SOX2 + KLF! |
| CLSTN2     | SOX2-KLF5 coregulated genes from PMID: 33972779 | SOX2 + KLF! |
| CLDN4      | SOX2-KLF5 coregulated genes from PMID: 33972779 | SOX2 + KLF! |
| SLC25A24   | SOX2-KLF5 coregulated genes from PMID: 33972779 | SOX2 + KLF! |
| GGH        | SOX2-KLF5 coregulated genes from PMID: 33972779 | SOX2 + KLF! |
| ROCK2      | SOX2-KLF5 coregulated genes from PMID: 33972779 | SOX2 + KLF! |
| ARHGAP20   | SOX2-KLF5 coregulated genes from PMID: 33972779 | SOX2 + KLF! |
| DNM3       | SOX2-KLF5 coregulated genes from PMID: 33972779 | SOX2 + KLF! |
| GRIP1      | SOX2-KLF5 coregulated genes from PMID: 33972779 | SOX2 + KLF! |
| CHMP2B     | SOX2-KLF5 coregulated genes from PMID: 33972779 | SOX2 + KLF! |
| CAPN2      | SOX2-KLF5 coregulated genes from PMID: 33972779 | SOX2 + KLF! |
| ELF3       | SOX2-KLF5 coregulated genes from PMID: 33972779 | SOX2 + KLF! |
| BMPR2      | SOX2-KLF5 coregulated genes from PMID: 33972779 | SOX2 + KLF! |
| EIF4G3     | SOX2-KLF5 coregulated genes from PMID: 33972779 | SOX2 + KLF! |
| DSP        | SOX2-KLF5 coregulated genes from PMID: 33972779 | SOX2 + KLF! |
| ERC1       | SOX2-KLF5 coregulated genes from PMID: 33972779 | SOX2 + KLF! |
| QSOX1      | SOX2-KLF5 coregulated genes from PMID: 33972779 | SOX2 + KLF! |
| KRT20      | SOX2-KLF5 coregulated genes from PMID: 33972779 | SOX2 + KLF! |
| ACOX1      | SOX2-KLF5 coregulated genes from PMID: 33972779 | SOX2 + KLF! |
| RASGRP1    | SOX2-KLF5 coregulated genes from PMID: 33972779 | SOX2 + KLF! |
| HMCN1      | SOX2-KLF5 coregulated genes from PMID: 33972779 | SOX2 + KLF! |
| TNFAIP3    | SOX2-KLF5 coregulated genes from PMID: 33972779 | SOX2 + KLF! |
| NGEF       | SOX2-KLF5 coregulated genes from PMID: 33972779 | SOX2 + KLF! |
| ATP10A     | SOX2-KLF5 coregulated genes from PMID: 33972779 | SOX2 + KLF! |
| LMNA       | SOX2-KLF5 coregulated genes from PMID: 33972779 | SOX2 + KLF! |
| C3orf52    | SOX2-KLF5 coregulated genes from PMID: 33972779 | SOX2 + KLF! |
| DST        | SOX2-KLF5 coregulated genes from PMID: 33972779 | SOX2 + KLF! |
| SGMS2      | SOX2-KLF5 coregulated genes from PMID: 33972779 | SOX2 + KLF! |
| FAM189B    | SOX2-KLF5 coregulated genes from PMID: 33972779 | SOX2 + KLF! |
| EZR        | SOX2-KLF5 coregulated genes from PMID: 33972779 | SOX2 + KLF! |
| CASQ2      | SOX2-KLF5 coregulated genes from PMID: 33972779 | SOX2 + KLF! |
| CSGALNACT1 | SOX2-KLF5 coregulated genes from PMID: 33972779 | SOX2 + KLF! |
| ZNF362     | SOX2-KLF5 coregulated genes from PMID: 33972779 | SOX2 + KLF! |
| ACAD9      | SOX2-KLF5 coregulated genes from PMID: 33972779 | SOX2 + KLF! |
| CDC42EP3   | SOX2-KLF5 coregulated genes from PMID: 33972779 | SOX2 + KLF! |
| LIMA1      | SOX2-KLF5 coregulated genes from PMID: 33972779 | SOX2 + KLF! |
| NR4A1      | SOX2-KLF5 coregulated genes from PMID: 33972779 | SOX2 + KLF! |
| NRP2       | SOX2-KLF5 coregulated genes from PMID: 33972779 | SOX2 + KLF! |
| ODC1       | SOX2-KLF5 coregulated genes from PMID: 33972779 | SOX2 + KLF! |
| ACVR1      | SOX2-KLF5 coregulated genes from PMID: 33972779 | SOX2 + KLF! |
| FAM126A    | SOX2-KLF5 coregulated genes from PMID: 33972779 | SOX2 + KLF! |
| IFIH1      | SOX2-KLF5 coregulated genes from PMID: 33972779 | SOX2 + KLF! |
| SYTL3      | SOX2-KLF5 coregulated genes from PMID: 33972779 | SOX2 + KLF! |
| SMG7       | SOX2-KLF5 coregulated genes from PMID: 33972779 | SOX2 + KLF! |
| SGK1       | SOX2-KLF5 coregulated genes from PMID: 33972779 | SOX2 + KLF! |
| IL18RAP    | SOX2-KLF5 coregulated genes from PMID: 33972779 | SOX2 + KLF! |
| LFNG       | SOX2-KLF5 coregulated genes from PMID: 33972779 | SOX2 + KLF! |
| SLC4A7     | SOX2-KLF5 coregulated genes from PMID: 33972779 | SOX2 + KLF! |
| C3orf70    | SOX2-KLF5 coregulated genes from PMID: 33972779 | SOX2 + KLF! |
| LAMC2      | SOX2-KLF5 coregulated genes from PMID: 33972779 | SOX2 + KLF! |
| EIF1       | SOX2-KLF5 coregulated genes from PMID: 33972779 | SOX2 + KLF! |
| SFXN3      | SOX2-KLF5 coregulated genes from PMID: 33972779 | SOX2 + KLF! |
| MBNL1      | SOX2-KLF5 coregulated genes from PMID: 33972779 | SOX2 + KLF! |
| NHSL1      | SOX2-KLF5 coregulated genes from PMID: 33972779 | SOX2 + KLF! |

|          |                                                 |             |
|----------|-------------------------------------------------|-------------|
| KIT      | SOX2-KLF5 coregulated genes from PMID: 33972779 | SOX2 + KLF! |
| GBP2     | SOX2-KLF5 coregulated genes from PMID: 33972779 | SOX2 + KLF! |
| PLD5     | SOX2-KLF5 coregulated genes from PMID: 33972779 | SOX2 + KLF! |
| STC2     | SOX2-KLF5 coregulated genes from PMID: 33972779 | SOX2 + KLF! |
| RGS5     | SOX2-KLF5 coregulated genes from PMID: 33972779 | SOX2 + KLF! |
| ASPA     | SOX2-KLF5 coregulated genes from PMID: 33972779 | SOX2 + KLF! |
| GBP5     | SOX2-KLF5 coregulated genes from PMID: 33972779 | SOX2 + KLF! |
| RPRM     | SOX2-KLF5 coregulated genes from PMID: 33972779 | SOX2 + KLF! |
| FOXP1    | SOX2-KLF5 coregulated genes from PMID: 33972779 | SOX2 + KLF! |
| AMIGO1   | SOX2-KLF5 coregulated genes from PMID: 33972779 | SOX2 + KLF! |
| PDE4DIP  | SOX2-KLF5 coregulated genes from PMID: 33972779 | SOX2 + KLF! |
| SNRNP48  | SOX2-KLF5 coregulated genes from PMID: 33972779 | SOX2 + KLF! |
| PXDN     | SOX2-KLF5 coregulated genes from PMID: 33972779 | SOX2 + KLF! |
| SULT2B1  | SOX2-KLF5 coregulated genes from PMID: 33972779 | SOX2 + KLF! |
| CRYZ     | SOX2-KLF5 coregulated genes from PMID: 33972779 | SOX2 + KLF! |
| THBS2    | SOX2-KLF5 coregulated genes from PMID: 33972779 | SOX2 + KLF! |
| STAC     | SOX2-KLF5 coregulated genes from PMID: 33972779 | SOX2 + KLF! |
| SLC6A6   | SOX2-KLF5 coregulated genes from PMID: 33972779 | SOX2 + KLF! |
| SPPL3    | SOX2-KLF5 coregulated genes from PMID: 33972779 | SOX2 + KLF! |
| LPGAT1   | SOX2-KLF5 coregulated genes from PMID: 33972779 | SOX2 + KLF! |
| CLDN1    | SOX2-KLF5 coregulated genes from PMID: 33972779 | SOX2 + KLF! |
| PDLIM4   | SOX2-KLF5 coregulated genes from PMID: 33972779 | SOX2 + KLF! |
| EPN2     | SOX2-KLF5 coregulated genes from PMID: 33972779 | SOX2 + KLF! |
| JUN      | SOX2-KLF5 coregulated genes from PMID: 33972779 | SOX2 + KLF! |
| TNIP1    | SOX2-KLF5 coregulated genes from PMID: 33972779 | SOX2 + KLF! |
| S1PR1    | SOX2-KLF5 coregulated genes from PMID: 33972779 | SOX2 + KLF! |
| CD9      | SOX2-KLF5 coregulated genes from PMID: 33972779 | SOX2 + KLF! |
| ANGPT1   | SOX2-KLF5 coregulated genes from PMID: 33972779 | SOX2 + KLF! |
| SLC6A2   | SOX2-KLF5 coregulated genes from PMID: 33972779 | SOX2 + KLF! |
| RBFOX1   | SOX2-KLF5 coregulated genes from PMID: 33972779 | SOX2 + KLF! |
| DGKI     | SOX2-KLF5 coregulated genes from PMID: 33972779 | SOX2 + KLF! |
| ATXN1    | SOX2-KLF5 coregulated genes from PMID: 33972779 | SOX2 + KLF! |
| SOX13    | SOX2-KLF5 coregulated genes from PMID: 33972779 | SOX2 + KLF! |
| VCAM1    | SOX2-KLF5 coregulated genes from PMID: 33972779 | SOX2 + KLF! |
| TFCP2L1  | SOX2-KLF5 coregulated genes from PMID: 33972779 | SOX2 + KLF! |
| LRRC8B   | SOX2-KLF5 coregulated genes from PMID: 33972779 | SOX2 + KLF! |
| MACF1    | SOX2-KLF5 coregulated genes from PMID: 33972779 | SOX2 + KLF! |
| TP63     | SOX2-KLF5 coregulated genes from PMID: 33972779 | SOX2 + KLF! |
| DUSP1    | SOX2-KLF5 coregulated genes from PMID: 33972779 | SOX2 + KLF! |
| SLC16A11 | SOX2-KLF5 coregulated genes from PMID: 33972779 | SOX2 + KLF! |
| PLS1     | SOX2-KLF5 coregulated genes from PMID: 33972779 | SOX2 + KLF! |
| ABCB11   | SOX2-KLF5 coregulated genes from PMID: 33972779 | SOX2 + KLF! |
| HS3ST3A1 | SOX2-KLF5 coregulated genes from PMID: 33972779 | SOX2 + KLF! |
| ANGPTL4  | SOX2-KLF5 coregulated genes from PMID: 33972779 | SOX2 + KLF! |
| HRH1     | SOX2-KLF5 coregulated genes from PMID: 33972779 | SOX2 + KLF! |
| GNB4     | SOX2-KLF5 coregulated genes from PMID: 33972779 | SOX2 + KLF! |
| CNN3     | SOX2-KLF5 coregulated genes from PMID: 33972779 | SOX2 + KLF! |
| CREG1    | SOX2-KLF5 coregulated genes from PMID: 33972779 | SOX2 + KLF! |
| RNF19B   | SOX2-KLF5 coregulated genes from PMID: 33972779 | SOX2 + KLF! |
| PDE4D    | SOX2-KLF5 coregulated genes from PMID: 33972779 | SOX2 + KLF! |
| MDFIC    | SOX2-KLF5 coregulated genes from PMID: 33972779 | SOX2 + KLF! |
| BCL2L15  | SOX2-KLF5 coregulated genes from PMID: 33972779 | SOX2 + KLF! |
| TRIO     | SOX2-KLF5 coregulated genes from PMID: 33972779 | SOX2 + KLF! |
| LPAR3    | SOX2-KLF5 coregulated genes from PMID: 33972779 | SOX2 + KLF! |
| GOLIM4   | SOX2-KLF5 coregulated genes from PMID: 33972779 | SOX2 + KLF! |
| MYH14    | SOX2-KLF5 coregulated genes from PMID: 33972779 | SOX2 + KLF! |
| VIM      | SOX2-KLF5 coregulated genes from PMID: 33972779 | SOX2 + KLF! |
| COL4A3   | SOX2-KLF5 coregulated genes from PMID: 33972779 | SOX2 + KLF! |
| PTPRJ    | SOX2-KLF5 coregulated genes from PMID: 33972779 | SOX2 + KLF! |

|          |                                                 |             |
|----------|-------------------------------------------------|-------------|
| NWD1     | SOX2-KLF5 coregulated genes from PMID: 33972779 | SOX2 + KLF! |
| MNDA     | SOX2-KLF5 coregulated genes from PMID: 33972779 | SOX2 + KLF! |
| SLC25A10 | SOX2-KLF5 coregulated genes from PMID: 33972779 | SOX2 + KLF! |
| PRMT6    | SOX2-KLF5 coregulated genes from PMID: 33972779 | SOX2 + KLF! |
| PTGS2    | SOX2-KLF5 coregulated genes from PMID: 33972779 | SOX2 + KLF! |
| CCL20    | SOX2-KLF5 coregulated genes from PMID: 33972779 | SOX2 + KLF! |
| RARB     | SOX2-KLF5 coregulated genes from PMID: 33972779 | SOX2 + KLF! |
| TWF2     | SOX2-KLF5 coregulated genes from PMID: 33972779 | SOX2 + KLF! |
| DHRS9    | SOX2-KLF5 coregulated genes from PMID: 33972779 | SOX2 + KLF! |
| SH3PXD2A | SOX2-KLF5 coregulated genes from PMID: 33972779 | SOX2 + KLF! |
| PLEKHM3  | SOX2-KLF5 coregulated genes from PMID: 33972779 | SOX2 + KLF! |
| AFF1     | SOX2-KLF5 coregulated genes from PMID: 33972779 | SOX2 + KLF! |
| TRIM33   | SOX2-KLF5 coregulated genes from PMID: 33972779 | SOX2 + KLF! |
| LRIG1    | SOX2-KLF5 coregulated genes from PMID: 33972779 | SOX2 + KLF! |
| SIPA1L2  | SOX2-KLF5 coregulated genes from PMID: 33972779 | SOX2 + KLF! |
| ABR      | SOX2-KLF5 coregulated genes from PMID: 33972779 | SOX2 + KLF! |
| NUAK1    | SOX2-KLF5 coregulated genes from PMID: 33972779 | SOX2 + KLF! |
| RAP2B    | SOX2-KLF5 coregulated genes from PMID: 33972779 | SOX2 + KLF! |
| KRT8     | SOX2-KLF5 coregulated genes from PMID: 33972779 | SOX2 + KLF! |
| SEMA6A   | SOX2-KLF5 coregulated genes from PMID: 33972779 | SOX2 + KLF! |
| SBF2     | SOX2-KLF5 coregulated genes from PMID: 33972779 | SOX2 + KLF! |
| LRR8C    | SOX2-KLF5 coregulated genes from PMID: 33972779 | SOX2 + KLF! |
| IQGAP2   | SOX2-KLF5 coregulated genes from PMID: 33972779 | SOX2 + KLF! |
| BMP2     | SOX2 regulated genes from PMID: 20726797        | SOX2        |
| BMP4     | SOX2 regulated genes from PMID: 20726797        | SOX2        |
| BMPR2    | SOX2 regulated genes from PMID: 20726797        | SOX2        |
| PCSK6    | SOX2 regulated genes from PMID: 20726797        | SOX2        |
| SMAD5    | SOX2 regulated genes from PMID: 20726797        | SOX2        |
| SMAD6    | SOX2 regulated genes from PMID: 20726797        | SOX2        |
| SMAD7    | SOX2 regulated genes from PMID: 20726797        | SOX2        |
| SMURF1   | SOX2 regulated genes from PMID: 20726797        | SOX2        |
| IGF1R    | SOX2 regulated genes from PMID: 20726797        | SOX2        |
| GNA15    | SOX2 regulated genes from PMID: 20726797        | SOX2        |
| TGFB2    | SOX2 regulated genes from PMID: 20726797        | SOX2        |
| RGS3     | SOX2 regulated genes from PMID: 20726797        | SOX2        |
| FGFR3    | SOX2 regulated genes from PMID: 20726797        | SOX2        |
| IL6ST    | SOX2 regulated genes from PMID: 20726797        | SOX2        |
| EREG     | SOX2 regulated genes from PMID: 20726797        | SOX2        |
| SOCS5    | SOX2 regulated genes from PMID: 20726797        | SOX2        |
| IRAK1    | SOX2 regulated genes from PMID: 20726797        | SOX2        |
| PIK3R1   | SOX2 regulated genes from PMID: 20726797        | SOX2        |
| EDN1     | SOX2 regulated genes from PMID: 20726797        | SOX2        |
| OPN3     | SOX2 regulated genes from PMID: 20726797        | SOX2        |
| PYCARD   | SOX2 regulated genes from PMID: 20726797        | SOX2        |
| SIGIRR   | SOX2 regulated genes from PMID: 20726797        | SOX2        |
| CD24     | SOX2 regulated genes from PMID: 20726797        | SOX2        |
| AGRN     | SOX2 regulated genes from PMID: 20726797        | SOX2        |
| RHOQ     | SOX2 regulated genes from PMID: 20726797        | SOX2        |
| IRS1     | SOX2 regulated genes from PMID: 20726797        | SOX2        |
| MAML3    | SOX2 regulated genes from PMID: 20726797        | SOX2        |
| GNB2     | SOX2 regulated genes from PMID: 20726797        | SOX2        |
| COL16A1  | SOX2 regulated genes from PMID: 20726797        | SOX2        |
| MTSS1    | SOX2 regulated genes from PMID: 20726797        | SOX2        |
| TRIB1    | SOX2 regulated genes from PMID: 20726797        | SOX2        |
| PTK2     | SOX2 regulated genes from PMID: 20726797        | SOX2        |
| IFITM1   | SOX2 regulated genes from PMID: 20726797        | SOX2        |
| ACVR1    | SOX2 regulated genes from PMID: 20726797        | SOX2        |
| CCRL2    | SOX2 regulated genes from PMID: 20726797        | SOX2        |
| TACSTD2  | SOX2 regulated genes from PMID: 20726797        | SOX2        |

|         |                                                      |      |
|---------|------------------------------------------------------|------|
| PTPRF   | SOX2 regulated genes from PMID: 20726797             | SOX2 |
| SMAD3   | SOX2 regulated genes from PMID: 20726797             | SOX2 |
| DGKQ    | SOX2 regulated genes from PMID: 20726797             | SOX2 |
| SRC     | SOX2 regulated genes from PMID: 20726797             | SOX2 |
| EGFR    | SOX2 regulated genes from PMID: 20726797             | SOX2 |
| DGKH    | SOX2 regulated genes from PMID: 20726797             | SOX2 |
| KLK6    | SOX2 regulated genes from PMID: 20726797             | SOX2 |
| GAB1    | SOX2 regulated genes from PMID: 20726797             | SOX2 |
| VIPR1   | SOX2 regulated genes from PMID: 20726797             | SOX2 |
| PARD3   | SOX2 regulated genes from PMID: 20726797             | SOX2 |
| CD14    | SOX2 regulated genes from PMID: 20726797             | SOX2 |
| ROR1    | SOX2 regulated genes from PMID: 20726797             | SOX2 |
| ADAM17  | SOX2 regulated genes from PMID: 20726797             | SOX2 |
| ADAM10  | SOX2 regulated genes from PMID: 20726797             | SOX2 |
| NUP62   | SOX2 regulated genes from PMID: 20726797             | SOX2 |
| LEPR    | SOX2 regulated genes from PMID: 20726797             | SOX2 |
| P2RY2   | SOX2 regulated genes from PMID: 20726797             | SOX2 |
| AFAP1L2 | SOX2 regulated genes from PMID: 20726797             | SOX2 |
| AREG    | SOX2 regulated genes from PMID: 20726797             | SOX2 |
| HPGD    | SOX2 regulated genes from PMID: 20726797             | SOX2 |
| STAT3   | SOX2 regulated genes from PMID: 20726797             | SOX2 |
| CXCL1   | SOX2 regulated genes from PMID: 20726797             | SOX2 |
| GPR37   | SOX2 regulated genes from PMID: 20726797             | SOX2 |
| CD59    | SOX2 regulated genes from PMID: 20726797             | SOX2 |
| LY6E    | SOX2 regulated genes from PMID: 20726797             | SOX2 |
| CBLC    | SOX2 regulated genes from PMID: 20726797             | SOX2 |
| PSENNEN | SOX2 regulated genes from PMID: 20726797             | SOX2 |
| THBS1   | SOX2 regulated genes from PMID: 20726797             | SOX2 |
| DEFB1   | SOX2 regulated genes from PMID: 20726797             | SOX2 |
| ADRA2A  | SOX2 regulated genes from PMID: 20726797             | SOX2 |
| RGS2    | SOX2 regulated genes from PMID: 20726797             | SOX2 |
| ITPR3   | SOX2 regulated genes from PMID: 20726797             | SOX2 |
| RBP4    | SOX2 regulated genes from PMID: 20726797             | SOX2 |
| HSD17B2 | SOX2 regulated genes from PMID: 20726797             | SOX2 |
| RXRA    | SOX2 regulated genes from PMID: 20726797             | SOX2 |
| AQP3    | SOX2 regulated genes from PMID: 20726797             | SOX2 |
| RARA    | SOX2 regulated genes from PMID: 20726797             | SOX2 |
| TRIM16  | SOX2 regulated genes from PMID: 20726797             | SOX2 |
| ELF1    | SOX2 regulated genes in Wounding from PMID: 30772301 | SOX2 |
| FLRT3   | SOX2 regulated genes in Wounding from PMID: 30772301 | SOX2 |
| SUV39H2 | SOX2 regulated genes in Wounding from PMID: 30772301 | SOX2 |
| PSTPIP2 | SOX2 regulated genes in Wounding from PMID: 30772301 | SOX2 |
| TTC39B  | SOX2 regulated genes in Wounding from PMID: 30772301 | SOX2 |
| EXOC5   | SOX2 regulated genes in Wounding from PMID: 30772301 | SOX2 |
| SLITRK4 | SOX2 regulated genes in Wounding from PMID: 30772301 | SOX2 |
| TFAP2C  | SOX2 regulated genes in Wounding from PMID: 30772301 | SOX2 |
| AHCY    | SOX2 regulated genes in Wounding from PMID: 30772301 | SOX2 |
| OSBP2   | SOX2 regulated genes in Wounding from PMID: 30772301 | SOX2 |
| IL13RA1 | SOX2 regulated genes in Wounding from PMID: 30772301 | SOX2 |
| ADGRA3  | SOX2 regulated genes in Wounding from PMID: 30772301 | SOX2 |
| PBDC1   | SOX2 regulated genes in Wounding from PMID: 30772301 | SOX2 |
| SMOX    | SOX2 regulated genes in Wounding from PMID: 30772301 | SOX2 |
| TCEAL5  | SOX2 regulated genes in Wounding from PMID: 30772301 | SOX2 |
| FBXO7   | SOX2 regulated genes in Wounding from PMID: 30772301 | SOX2 |
| SLC39A6 | SOX2 regulated genes in Wounding from PMID: 30772301 | SOX2 |
| YES1    | SOX2 regulated genes in Wounding from PMID: 30772301 | SOX2 |
| RGS6    | SOX2 regulated genes in Wounding from PMID: 30772301 | SOX2 |
| TMEM50B | SOX2 regulated genes in Wounding from PMID: 30772301 | SOX2 |
| GAREM1  | SOX2 regulated genes in Wounding from PMID: 30772301 | SOX2 |



|               |                                                      |      |
|---------------|------------------------------------------------------|------|
| SLC37A1       | SOX2 regulated genes in Wounding from PMID: 30772301 | SOX2 |
| FAM3B         | SOX2 regulated genes in Wounding from PMID: 30772301 | SOX2 |
| CCT8          | SOX2 regulated genes in Wounding from PMID: 30772301 | SOX2 |
| ASCC2         | SOX2 regulated genes in Wounding from PMID: 30772301 | SOX2 |
| TPTEP2-CSNK1E | SOX2 regulated genes in Wounding from PMID: 30772301 | SOX2 |
| CSNK1E        | SOX2 regulated genes in Wounding from PMID: 30772301 | SOX2 |
| KLF6          | SOX2 regulated genes in Wounding from PMID: 30772301 | SOX2 |
| BTG3          | SOX2 regulated genes in Wounding from PMID: 30772301 | SOX2 |
| LURAP1L       | SOX2 regulated genes in Wounding from PMID: 30772301 | SOX2 |
| DSG3          | SOX2 regulated genes in Wounding from PMID: 30772301 | SOX2 |
| MAFF          | SOX2 regulated genes in Wounding from PMID: 30772301 | SOX2 |
| HSPA13        | SOX2 regulated genes in Wounding from PMID: 30772301 | SOX2 |
| WDR1          | SOX2 regulated genes in Wounding from PMID: 30772301 | SOX2 |
| PSPC1         | SOX2 regulated genes in Wounding from PMID: 30772301 | SOX2 |
| RAE1          | SOX2 regulated genes in Wounding from PMID: 30772301 | SOX2 |
| EIF2S2        | SOX2 regulated genes in Wounding from PMID: 30772301 | SOX2 |
| GTPBP6        | SOX2 regulated genes in Wounding from PMID: 30772301 | SOX2 |
| PRELID3B      | SOX2 regulated genes in Wounding from PMID: 30772301 | SOX2 |
| UNC79         | SOX2 regulated genes in Wounding from PMID: 30772301 | SOX2 |
| ZBTB7C        | SOX2 regulated genes in Wounding from PMID: 30772301 | SOX2 |
| LTBP2         | SOX2 regulated genes in Wounding from PMID: 30772301 | SOX2 |
| DEPDC5        | SOX2 regulated genes in Wounding from PMID: 30772301 | SOX2 |
| TMEM30B       | SOX2 regulated genes in Wounding from PMID: 30772301 | SOX2 |
| PCSK2         | SOX2 regulated genes in Wounding from PMID: 30772301 | SOX2 |
| NUDT11        | SOX2 regulated genes in Wounding from PMID: 30772301 | SOX2 |
| BRWD1         | SOX2 regulated genes in Wounding from PMID: 30772301 | SOX2 |
| BTBD7         | SOX2 regulated genes in Wounding from PMID: 30772301 | SOX2 |
| DSTN          | SOX2 regulated genes in Wounding from PMID: 30772301 | SOX2 |
| SAMD10        | SOX2 regulated genes in Wounding from PMID: 30772301 | SOX2 |
| XKRX          | SOX2 regulated genes in Wounding from PMID: 30772301 | SOX2 |
| MTCL1         | SOX2 regulated genes in Wounding from PMID: 30772301 | SOX2 |
| NAA30         | SOX2 regulated genes in Wounding from PMID: 30772301 | SOX2 |
| SCEL          | SOX2 regulated genes in Wounding from PMID: 30772301 | SOX2 |
| RRP1          | SOX2 regulated genes in Wounding from PMID: 30772301 | SOX2 |
| CCDC85C       | SOX2 regulated genes in Wounding from PMID: 30772301 | SOX2 |
| RNF152        | SOX2 regulated genes in Wounding from PMID: 30772301 | SOX2 |
| CLDN14        | SOX2 regulated genes in Wounding from PMID: 30772301 | SOX2 |
| PLEKHD1       | SOX2 regulated genes in Wounding from PMID: 30772301 | SOX2 |
| OSM           | SOX2 regulated genes in Wounding from PMID: 30772301 | SOX2 |
| RNF17         | SOX2 regulated genes in Wounding from PMID: 30772301 | SOX2 |
| TMEM33        | SOX2 regulated genes in Wounding from PMID: 30772301 | SOX2 |
| TRMT5         | SOX2 regulated genes in Wounding from PMID: 30772301 | SOX2 |
| BMP2          | SOX2 regulated genes in Wounding from PMID: 30772301 | SOX2 |
| SRSF5         | SOX2 regulated genes in Wounding from PMID: 30772301 | SOX2 |
| LHFPL1        | SOX2 regulated genes in Wounding from PMID: 30772301 | SOX2 |
| CDKN2B        | SOX2 regulated genes in Wounding from PMID: 30772301 | SOX2 |
| TXNL1         | SOX2 regulated genes in Wounding from PMID: 30772301 | SOX2 |
| DHX15         | SOX2 regulated genes in Wounding from PMID: 30772301 | SOX2 |
| POF1B         | SOX2 regulated genes in Wounding from PMID: 30772301 | SOX2 |
| NDP           | SOX2 regulated genes in Wounding from PMID: 30772301 | SOX2 |
| MTAP          | SOX2 regulated genes in Wounding from PMID: 30772301 | SOX2 |
| RIPK4         | SOX2 regulated genes in Wounding from PMID: 30772301 | SOX2 |
| EFNB1         | SOX2 regulated genes in Wounding from PMID: 30772301 | SOX2 |
| ACAA2         | SOX2 regulated genes in Wounding from PMID: 30772301 | SOX2 |
| PDE9A         | SOX2 regulated genes in Wounding from PMID: 30772301 | SOX2 |
| LIMK2         | SOX2 regulated genes in Wounding from PMID: 30772301 | SOX2 |
| CTIF          | SOX2 regulated genes in Wounding from PMID: 30772301 | SOX2 |
| SYNGR1        | SOX2 regulated genes in Wounding from PMID: 30772301 | SOX2 |
| PMEPA1        | SOX2 regulated genes in Wounding from PMID: 30772301 | SOX2 |

|           |                                                      |      |
|-----------|------------------------------------------------------|------|
| HSPH1     | SOX2 regulated genes in Wounding from PMID: 30772301 | SOX2 |
| USP16     | SOX2 regulated genes in Wounding from PMID: 30772301 | SOX2 |
| C21orf91  | SOX2 regulated genes in Wounding from PMID: 30772301 | SOX2 |
| RAB27B    | SOX2 regulated genes in Wounding from PMID: 30772301 | SOX2 |
| CORIN     | SOX2 regulated genes in Wounding from PMID: 30772301 | SOX2 |
| EIF4ENIF1 | SOX2 regulated genes in Wounding from PMID: 30772301 | SOX2 |
| TGIF1     | SOX2 regulated genes in Wounding from PMID: 30772301 | SOX2 |
| MYO5B     | SOX2 regulated genes in Wounding from PMID: 30772301 | SOX2 |
| SLAIN1    | SOX2 regulated genes in Wounding from PMID: 30772301 | SOX2 |
| MSX1      | SOX2 regulated genes in Wounding from PMID: 30772301 | SOX2 |
| GTF2F2    | SOX2 regulated genes in Wounding from PMID: 30772301 | SOX2 |
| JAG1      | SOX2 regulated genes in Wounding from PMID: 30772301 | SOX2 |
| SLC25A17  | SOX2 regulated genes in Wounding from PMID: 30772301 | SOX2 |
| CDKL5     | SOX2 regulated genes in Wounding from PMID: 30772301 | SOX2 |
| BRWD3     | SOX2 regulated genes in Wounding from PMID: 30772301 | SOX2 |
| SMAD2     | SOX2 regulated genes in Wounding from PMID: 30772301 | SOX2 |
| TEC       | SOX2 regulated genes in Wounding from PMID: 30772301 | SOX2 |
| HOPX      | SOX2 regulated genes in Wounding from PMID: 30772301 | SOX2 |
| SDC4      | SOX2 regulated genes in Wounding from PMID: 30772301 | SOX2 |
| ATRN      | SOX2 regulated genes in Wounding from PMID: 30772301 | SOX2 |
| COL18A1   | SOX2 regulated genes in Wounding from PMID: 30772301 | SOX2 |
| PLA2G3    | SOX2 regulated genes in Wounding from PMID: 30772301 | SOX2 |
| ETS2      | SOX2 regulated genes in Wounding from PMID: 30772301 | SOX2 |
| TBC1D25   | SOX2 regulated genes in Wounding from PMID: 30772301 | SOX2 |
| DSG4      | SOX2 regulated genes in Wounding from PMID: 30772301 | SOX2 |
| CCDC68    | SOX2 regulated genes in Wounding from PMID: 30772301 | SOX2 |
| RUNX1     | SOX2 regulated genes in Wounding from PMID: 30772301 | SOX2 |
| S100G     | SOX2 regulated genes in Wounding from PMID: 30772301 | SOX2 |
| EYA2      | SOX2 regulated genes in Wounding from PMID: 30772301 | SOX2 |
| CPLX1     | SOX2 regulated genes in Wounding from PMID: 30772301 | SOX2 |
| JADE3     | SOX2 regulated genes in Wounding from PMID: 30772301 | SOX2 |
| RNF4      | SOX2 regulated genes in Wounding from PMID: 30772301 | SOX2 |
| MORC4     | SOX2 regulated genes in Wounding from PMID: 30772301 | SOX2 |
| SYCP2     | SOX2 regulated genes in Wounding from PMID: 30772301 | SOX2 |
| PPP2R5E   | SOX2 regulated genes in Wounding from PMID: 30772301 | SOX2 |
| RBBP8NL   | SOX2 regulated genes in Wounding from PMID: 30772301 | SOX2 |
| CSTB      | SOX2 regulated genes in Wounding from PMID: 30772301 | SOX2 |
| TP53INP2  | SOX2 regulated genes in Wounding from PMID: 30772301 | SOX2 |
| BMP7      | SOX2 regulated genes in Wounding from PMID: 30772301 | SOX2 |
| CLDN8     | SOX2 regulated genes in Wounding from PMID: 30772301 | SOX2 |
| RPRD1A    | SOX2 regulated genes in Wounding from PMID: 30772301 | SOX2 |
| ATP9A     | SOX2 regulated genes in Wounding from PMID: 30772301 | SOX2 |
| SYN3      | SOX2 regulated genes in Wounding from PMID: 30772301 | SOX2 |
| PCGF3     | SOX2 regulated genes in Wounding from PMID: 30772301 | SOX2 |
| SEC23B    | SOX2 regulated genes in Wounding from PMID: 30772301 | SOX2 |
| PCBP3     | SOX2 regulated genes in Wounding from PMID: 30772301 | SOX2 |
| PCNX4     | SOX2 regulated genes in Wounding from PMID: 30772301 | SOX2 |
| PDRG1     | SOX2 regulated genes in Wounding from PMID: 30772301 | SOX2 |
| RGP1      | SOX2 regulated genes in Wounding from PMID: 30772301 | SOX2 |
| OSBPL3    | SOX2 regulated genes in Wounding from PMID: 30772301 | SOX2 |
| PTPN3     | SOX2 regulated genes in Wounding from PMID: 30772301 | SOX2 |
| DNASE1L2  | SOX2 regulated genes in Wounding from PMID: 30772301 | SOX2 |
| TNFRSF13C | SOX2 regulated genes in Wounding from PMID: 30772301 | SOX2 |
| RNPS1     | SOX2 regulated genes in Wounding from PMID: 30772301 | SOX2 |
| SPEF1     | SOX2 regulated genes in Wounding from PMID: 30772301 | SOX2 |
| RASL10A   | SOX2 regulated genes in Wounding from PMID: 30772301 | SOX2 |
| OSER1     | SOX2 regulated genes in Wounding from PMID: 30772301 | SOX2 |
| TES       | SOX2 regulated genes in Wounding from PMID: 30772301 | SOX2 |
| SPIDR     | SOX2 regulated genes in Wounding from PMID: 30772301 | SOX2 |

|          |                                                      |      |
|----------|------------------------------------------------------|------|
| CAGE1    | SOX2 regulated genes in Wounding from PMID: 30772301 | SOX2 |
| PNP      | SOX2 regulated genes in Wounding from PMID: 30772301 | SOX2 |
| ARID3A   | SOX2 regulated genes in Wounding from PMID: 30772301 | SOX2 |
| BNIP3L   | SOX2 regulated genes in Wounding from PMID: 30772301 | SOX2 |
| CSPG4    | SOX2 regulated genes in Wounding from PMID: 30772301 | SOX2 |
| PRRG4    | SOX2 regulated genes in Wounding from PMID: 30772301 | SOX2 |
| PDAP1    | SOX2 regulated genes in Wounding from PMID: 30772301 | SOX2 |
| CELSR1   | SOX2 regulated genes in Wounding from PMID: 30772301 | SOX2 |
| PJA1     | SOX2 regulated genes in Wounding from PMID: 30772301 | SOX2 |
| COL4A5   | SOX2 regulated genes in Wounding from PMID: 30772301 | SOX2 |
| AIMP2    | SOX2 regulated genes in Wounding from PMID: 30772301 | SOX2 |
| DUSP9    | SOX2 regulated genes in Wounding from PMID: 30772301 | SOX2 |
| MICALL2  | SOX2 regulated genes in Wounding from PMID: 30772301 | SOX2 |
| FRYL     | SOX2 regulated genes in Wounding from PMID: 30772301 | SOX2 |
| CD2AP    | SOX2 regulated genes in Wounding from PMID: 30772301 | SOX2 |
| ITGA5    | SOX2 regulated genes in Wounding from PMID: 30772301 | SOX2 |
| C8orf48  | SOX2 regulated genes in Wounding from PMID: 30772301 | SOX2 |
| GSDMA    | SOX2 regulated genes in Wounding from PMID: 30772301 | SOX2 |
| BBOX1    | SOX2 regulated genes in Wounding from PMID: 30772301 | SOX2 |
| ANKRD50  | SOX2 regulated genes in Wounding from PMID: 30772301 | SOX2 |
| PARM1    | SOX2 regulated genes in Wounding from PMID: 30772301 | SOX2 |
| SMTN     | SOX2 regulated genes in Wounding from PMID: 30772301 | SOX2 |
| PARD6B   | SOX2 regulated genes in Wounding from PMID: 30772301 | SOX2 |
| SLC39A2  | SOX2 regulated genes in Wounding from PMID: 30772301 | SOX2 |
| TIAM1    | SOX2 regulated genes in Wounding from PMID: 30772301 | SOX2 |
| TAX1BP3  | SOX2 regulated genes in Wounding from PMID: 30772301 | SOX2 |
| RBM12    | SOX2 regulated genes in Wounding from PMID: 30772301 | SOX2 |
| QSOX2    | SOX2 regulated genes in Wounding from PMID: 30772301 | SOX2 |
| STAR     | SOX2 regulated genes in Wounding from PMID: 30772301 | SOX2 |
| JHY      | SOX2 regulated genes in Wounding from PMID: 30772301 | SOX2 |
| CSNK2A3  | SOX2 regulated genes in Wounding from PMID: 30772301 | SOX2 |
| CSNK2A1  | SOX2 regulated genes in Wounding from PMID: 30772301 | SOX2 |
| TADA2B   | SOX2 regulated genes in Wounding from PMID: 30772301 | SOX2 |
| CTBP2    | SOX2 regulated genes in Wounding from PMID: 30772301 | SOX2 |
| SLC38A2  | SOX2 regulated genes in Wounding from PMID: 30772301 | SOX2 |
| CARMIL1  | SOX2 regulated genes in Wounding from PMID: 30772301 | SOX2 |
| FAM83G   | SOX2 regulated genes in Wounding from PMID: 30772301 | SOX2 |
| LMX1B    | SOX2 regulated genes in Wounding from PMID: 30772301 | SOX2 |
| LAMA1    | SOX2 regulated genes in Wounding from PMID: 30772301 | SOX2 |
| GLS2     | SOX2 regulated genes in Wounding from PMID: 30772301 | SOX2 |
| NUP58    | SOX2 regulated genes in Wounding from PMID: 30772301 | SOX2 |
| GCOM1    | SOX2 regulated genes in Wounding from PMID: 30772301 | SOX2 |
| SERPINA3 | SOX2 regulated genes in Wounding from PMID: 30772301 | SOX2 |
| AMOTL1   | SOX2 regulated genes in Wounding from PMID: 30772301 | SOX2 |
| PIP5K1B  | SOX2 regulated genes in Wounding from PMID: 30772301 | SOX2 |
| DSC2     | SOX2 regulated genes in Wounding from PMID: 30772301 | SOX2 |
| PTPN13   | SOX2 regulated genes in Wounding from PMID: 30772301 | SOX2 |
| THNSL1   | SOX2 regulated genes in Wounding from PMID: 30772301 | SOX2 |
| ORMDL3   | SOX2 regulated genes in Wounding from PMID: 30772301 | SOX2 |
| GJA1     | SOX2 regulated genes in Wounding from PMID: 30772301 | SOX2 |
| CASK     | SOX2 regulated genes in Wounding from PMID: 30772301 | SOX2 |
| NCBP1    | SOX2 regulated genes in Wounding from PMID: 30772301 | SOX2 |
| HNRNPK   | SOX2 regulated genes in Wounding from PMID: 30772301 | SOX2 |
| DIO3     | SOX2 regulated genes in Wounding from PMID: 30772301 | SOX2 |
| PPIL1    | SOX2 regulated genes in Wounding from PMID: 30772301 | SOX2 |
| TLE1     | SOX2 regulated genes in Wounding from PMID: 30772301 | SOX2 |
| DLGAP4   | SOX2 regulated genes in Wounding from PMID: 30772301 | SOX2 |
| CYB5R4   | SOX2 regulated genes in Wounding from PMID: 30772301 | SOX2 |
| TBX1     | SOX2 regulated genes in Wounding from PMID: 30772301 | SOX2 |

|          |                                                      |      |
|----------|------------------------------------------------------|------|
| RNGTT    | SOX2 regulated genes in Wounding from PMID: 30772301 | SOX2 |
| MYO1D    | SOX2 regulated genes in Wounding from PMID: 30772301 | SOX2 |
| FMN1     | SOX2 regulated genes in Wounding from PMID: 30772301 | SOX2 |
| POLR2M   | SOX2 regulated genes in Wounding from PMID: 30772301 | SOX2 |
| EIF2B2   | SOX2 regulated genes in Wounding from PMID: 30772301 | SOX2 |
| ABHD13   | SOX2 regulated genes in Wounding from PMID: 30772301 | SOX2 |
| ARHGEF17 | SOX2 regulated genes in Wounding from PMID: 30772301 | SOX2 |
| CCT6A    | SOX2 regulated genes in Wounding from PMID: 30772301 | SOX2 |
| SMARCA5  | SOX2 regulated genes in Wounding from PMID: 30772301 | SOX2 |
| SPIRE1   | SOX2 regulated genes in Wounding from PMID: 30772301 | SOX2 |
| DCLK2    | SOX2 regulated genes in Wounding from PMID: 30772301 | SOX2 |
| PRAG1    | SOX2 regulated genes in Wounding from PMID: 30772301 | SOX2 |
| APLN     | SOX2 regulated genes in Wounding from PMID: 30772301 | SOX2 |
| GGT1     | SOX2 regulated genes in Wounding from PMID: 30772301 | SOX2 |
| NEDD9    | SOX2 regulated genes in Wounding from PMID: 30772301 | SOX2 |
| ERI1     | SOX2 regulated genes in Wounding from PMID: 30772301 | SOX2 |
| PFN1     | SOX2 regulated genes in Wounding from PMID: 30772301 | SOX2 |
| PGAP3    | SOX2 regulated genes in Wounding from PMID: 30772301 | SOX2 |
| BCR      | SOX2 regulated genes in Wounding from PMID: 30772301 | SOX2 |
| ATP12A   | SOX2 regulated genes in Wounding from PMID: 30772301 | SOX2 |
| PROCR    | SOX2 regulated genes in Wounding from PMID: 30772301 | SOX2 |
| SEMA7A   | SOX2 regulated genes in Wounding from PMID: 30772301 | SOX2 |
| EFNB2    | SOX2 regulated genes in Wounding from PMID: 30772301 | SOX2 |
| TMEM154  | SOX2 regulated genes in Wounding from PMID: 30772301 | SOX2 |
| ANXA1    | SOX2 regulated genes in Wounding from PMID: 30772301 | SOX2 |
| SRSF6    | SOX2 regulated genes in Wounding from PMID: 30772301 | SOX2 |
| ARHGDIG  | SOX2 regulated genes in Wounding from PMID: 30772301 | SOX2 |
| FOXQ1    | SOX2 regulated genes in Wounding from PMID: 30772301 | SOX2 |
| MBOAT1   | SOX2 regulated genes in Wounding from PMID: 30772301 | SOX2 |
| GSPT1    | SOX2 regulated genes in Wounding from PMID: 30772301 | SOX2 |
| GPR180   | SOX2 regulated genes in Wounding from PMID: 30772301 | SOX2 |
| TMEM98   | SOX2 regulated genes in Wounding from PMID: 30772301 | SOX2 |
| LRRC75B  | SOX2 regulated genes in Wounding from PMID: 30772301 | SOX2 |
| LPIN3    | SOX2 regulated genes in Wounding from PMID: 30772301 | SOX2 |
| ATP6V1E1 | SOX2 regulated genes in Wounding from PMID: 30772301 | SOX2 |
| TMPRSS2  | SOX2 regulated genes in Wounding from PMID: 30772301 | SOX2 |
| ABRACL   | SOX2 regulated genes in Wounding from PMID: 30772301 | SOX2 |
| ITPRIP   | SOX2 regulated genes in Wounding from PMID: 30772301 | SOX2 |
| CPNE8    | SOX2 regulated genes in Wounding from PMID: 30772301 | SOX2 |
| EBPL     | SOX2 regulated genes in Wounding from PMID: 30772301 | SOX2 |
| MYO10    | SOX2 regulated genes in Wounding from PMID: 30772301 | SOX2 |
| SPIN1    | SOX2 regulated genes in Wounding from PMID: 30772301 | SOX2 |
| SCML4    | SOX2 regulated genes in Wounding from PMID: 30772301 | SOX2 |
| PARD6G   | SOX2 regulated genes in Wounding from PMID: 30772301 | SOX2 |
| CDC6     | SOX2 regulated genes in Wounding from PMID: 30772301 | SOX2 |
| TBC1D2   | SOX2 regulated genes in Wounding from PMID: 30772301 | SOX2 |
| CDKL2    | SOX2 regulated genes in Wounding from PMID: 30772301 | SOX2 |
| HIRA     | SOX2 regulated genes in Wounding from PMID: 30772301 | SOX2 |
| CNN2     | SOX2 regulated genes in Wounding from PMID: 30772301 | SOX2 |
| GATAD1   | SOX2 regulated genes in Wounding from PMID: 30772301 | SOX2 |
| PORCN    | SOX2 regulated genes in Wounding from PMID: 30772301 | SOX2 |
| SENP6    | SOX2 regulated genes in Wounding from PMID: 30772301 | SOX2 |
| DIS3     | SOX2 regulated genes in Wounding from PMID: 30772301 | SOX2 |
| HBS1L    | SOX2 regulated genes in Wounding from PMID: 30772301 | SOX2 |
| HSBP1L1  | SOX2 regulated genes in Wounding from PMID: 30772301 | SOX2 |
| CXXC4    | SOX2 regulated genes in Wounding from PMID: 30772301 | SOX2 |
| CREB3    | SOX2 regulated genes in Wounding from PMID: 30772301 | SOX2 |
| FEM1B    | SOX2 regulated genes in Wounding from PMID: 30772301 | SOX2 |
| STRAP    | SOX2 regulated genes in Wounding from PMID: 30772301 | SOX2 |

|           |                                                      |      |
|-----------|------------------------------------------------------|------|
| TADA2A    | SOX2 regulated genes in Wounding from PMID: 30772301 | SOX2 |
| ITPR3     | SOX2 regulated genes in Wounding from PMID: 30772301 | SOX2 |
| MYBL2     | SOX2 regulated genes in Wounding from PMID: 30772301 | SOX2 |
| SYT7      | SOX2 regulated genes in Wounding from PMID: 30772301 | SOX2 |
| PLXNA3    | SOX2 regulated genes in Wounding from PMID: 30772301 | SOX2 |
| FAM20C    | SOX2 regulated genes in Wounding from PMID: 30772301 | SOX2 |
| SEC14L2   | SOX2 regulated genes in Wounding from PMID: 30772301 | SOX2 |
| RWDD4     | SOX2 regulated genes in Wounding from PMID: 30772301 | SOX2 |
| BICD2     | SOX2 regulated genes in Wounding from PMID: 30772301 | SOX2 |
| HSP90AA1  | SOX2 regulated genes in Wounding from PMID: 30772301 | SOX2 |
| FARP1     | SOX2 regulated genes in Wounding from PMID: 30772301 | SOX2 |
| KREMEN1   | SOX2 regulated genes in Wounding from PMID: 30772301 | SOX2 |
| SMAP1     | SOX2 regulated genes in Wounding from PMID: 30772301 | SOX2 |
| CAAP1     | SOX2 regulated genes in Wounding from PMID: 30772301 | SOX2 |
| MMP9      | SOX2 regulated genes in Wounding from PMID: 30772301 | SOX2 |
| RHOV      | SOX2 regulated genes in Wounding from PMID: 30772301 | SOX2 |
| THBS1     | SOX2 regulated genes in Wounding from PMID: 30772301 | SOX2 |
| FANCF     | SOX2 regulated genes in Wounding from PMID: 30772301 | SOX2 |
| PCDH19    | SOX2 regulated genes in Wounding from PMID: 30772301 | SOX2 |
| BDKRB1    | SOX2 regulated genes in Wounding from PMID: 30772301 | SOX2 |
| COG6      | SOX2 regulated genes in Wounding from PMID: 30772301 | SOX2 |
| PAWR      | SOX2 regulated genes in Wounding from PMID: 30772301 | SOX2 |
| DUSP14    | SOX2 regulated genes in Wounding from PMID: 30772301 | SOX2 |
| NCKAP5L   | SOX2 regulated genes in Wounding from PMID: 30772301 | SOX2 |
| GP1BB     | SOX2 regulated genes in Wounding from PMID: 30772301 | SOX2 |
| CCDC120   | SOX2 regulated genes in Wounding from PMID: 30772301 | SOX2 |
| HSP90AB1  | SOX2 regulated genes in Wounding from PMID: 30772301 | SOX2 |
| CCDC25    | SOX2 regulated genes in Wounding from PMID: 30772301 | SOX2 |
| SEC63     | SOX2 regulated genes in Wounding from PMID: 30772301 | SOX2 |
| CCDC116   | SOX2 regulated genes in Wounding from PMID: 30772301 | SOX2 |
| ENTPD7    | SOX2 regulated genes in Wounding from PMID: 30772301 | SOX2 |
| LNX1      | SOX2 regulated genes in Wounding from PMID: 30772301 | SOX2 |
| SMAD7     | SOX2 regulated genes in Wounding from PMID: 30772301 | SOX2 |
| ACE2      | SOX2 regulated genes in Wounding from PMID: 30772301 | SOX2 |
| ARID2     | SOX2 regulated genes in Wounding from PMID: 30772301 | SOX2 |
| ARHGAP24  | SOX2 regulated genes in Wounding from PMID: 30772301 | SOX2 |
| DEPDC7    | SOX2 regulated genes in Wounding from PMID: 30772301 | SOX2 |
| CLNS1A    | SOX2 regulated genes in Wounding from PMID: 30772301 | SOX2 |
| GSTCD     | SOX2 regulated genes in Wounding from PMID: 30772301 | SOX2 |
| DERA      | SOX2 regulated genes in Wounding from PMID: 30772301 | SOX2 |
| PRICKLE1  | SOX2 regulated genes in Wounding from PMID: 30772301 | SOX2 |
| CAMSAP1   | SOX2 regulated genes in Wounding from PMID: 30772301 | SOX2 |
| REGG      | SOX2 regulated genes in Wounding from PMID: 30772301 | SOX2 |
| GFOD1     | SOX2 regulated genes in Wounding from PMID: 30772301 | SOX2 |
| TMPRSS11E | SOX2 regulated genes in Wounding from PMID: 30772301 | SOX2 |
| MORC2     | SOX2 regulated genes in Wounding from PMID: 30772301 | SOX2 |
| NIPSNAP1  | SOX2 regulated genes in Wounding from PMID: 30772301 | SOX2 |
| GMEB2     | SOX2 regulated genes in Wounding from PMID: 30772301 | SOX2 |
| FOXE1     | SOX2 regulated genes in Wounding from PMID: 30772301 | SOX2 |
| RUNX2     | SOX2 regulated genes in Wounding from PMID: 30772301 | SOX2 |
| C10orf88  | SOX2 regulated genes in Wounding from PMID: 30772301 | SOX2 |
| DPH6      | SOX2 regulated genes in Wounding from PMID: 30772301 | SOX2 |
| TBC1D10A  | SOX2 regulated genes in Wounding from PMID: 30772301 | SOX2 |
| RFLNB     | SOX2 regulated genes in Wounding from PMID: 30772301 | SOX2 |
| MINPP1    | SOX2 regulated genes in Wounding from PMID: 30772301 | SOX2 |
| CD109     | SOX2 regulated genes in Wounding from PMID: 30772301 | SOX2 |
| MTRR      | SOX2 regulated genes in Wounding from PMID: 30772301 | SOX2 |
| NXN       | SOX2 regulated genes in Wounding from PMID: 30772301 | SOX2 |
| SMOC1     | SOX2 regulated genes in Wounding from PMID: 30772301 | SOX2 |

|           |                                                      |      |
|-----------|------------------------------------------------------|------|
| TCF7L2    | SOX2 regulated genes in Wounding from PMID: 30772301 | SOX2 |
| CRELD2    | SOX2 regulated genes in Wounding from PMID: 30772301 | SOX2 |
| ATP6V1B2  | SOX2 regulated genes in Wounding from PMID: 30772301 | SOX2 |
| CISD2     | SOX2 regulated genes in Wounding from PMID: 30772301 | SOX2 |
| TMPRSS11F | SOX2 regulated genes in Wounding from PMID: 30772301 | SOX2 |
| GCLC      | SOX2 regulated genes in Wounding from PMID: 30772301 | SOX2 |
| SPATA18   | SOX2 regulated genes in Wounding from PMID: 30772301 | SOX2 |
| GBA2      | SOX2 regulated genes in Wounding from PMID: 30772301 | SOX2 |
| CPXM2     | SOX2 regulated genes in Wounding from PMID: 30772301 | SOX2 |
| RNF182    | SOX2 regulated genes in Wounding from PMID: 30772301 | SOX2 |
| CDK5R1    | SOX2 regulated genes in Wounding from PMID: 30772301 | SOX2 |
| AFAP1L2   | SOX2 regulated genes in Wounding from PMID: 30772301 | SOX2 |
| PDLIM1    | SOX2 regulated genes in Wounding from PMID: 30772301 | SOX2 |
| HDAC2     | SOX2 regulated genes in Wounding from PMID: 30772301 | SOX2 |
| KCNE1     | SOX2 regulated genes in Wounding from PMID: 30772301 | SOX2 |
| RCN2      | SOX2 regulated genes in Wounding from PMID: 30772301 | SOX2 |
| PRSS12    | SOX2 regulated genes in Wounding from PMID: 30772301 | SOX2 |
| CLU       | SOX2 regulated genes in Wounding from PMID: 30772301 | SOX2 |
| MICAL3    | SOX2 regulated genes in Wounding from PMID: 30772301 | SOX2 |
| CYP39A1   | SOX2 regulated genes in Wounding from PMID: 30772301 | SOX2 |
| SLC15A1   | SOX2 regulated genes in Wounding from PMID: 30772301 | SOX2 |
| SLC25A37  | SOX2 regulated genes in Wounding from PMID: 30772301 | SOX2 |
| SERPINB5  | SOX2 regulated genes in Wounding from PMID: 30772301 | SOX2 |
| SMAD6     | SOX2 regulated genes in Wounding from PMID: 30772301 | SOX2 |
| HDDC2     | SOX2 regulated genes in Wounding from PMID: 30772301 | SOX2 |
| PAQR8     | SOX2 regulated genes in Wounding from PMID: 30772301 | SOX2 |
| TCFL5     | SOX2 regulated genes in Wounding from PMID: 30772301 | SOX2 |
| HACE1     | SOX2 regulated genes in Wounding from PMID: 30772301 | SOX2 |
| LRAT      | SOX2 regulated genes in Wounding from PMID: 30772301 | SOX2 |
| CCDC169   | SOX2 regulated genes in Wounding from PMID: 30772301 | SOX2 |
| RASSF6    | SOX2 regulated genes in Wounding from PMID: 30772301 | SOX2 |
| ENTPD8    | SOX2 regulated genes in Wounding from PMID: 30772301 | SOX2 |
| STYK1     | SOX2 regulated genes in Wounding from PMID: 30772301 | SOX2 |
| RANGAP1   | SOX2 regulated genes in Wounding from PMID: 30772301 | SOX2 |
| DDX27     | SOX2 regulated genes in Wounding from PMID: 30772301 | SOX2 |
| PLCXD1    | SOX2 regulated genes in Wounding from PMID: 30772301 | SOX2 |
| SLC6A8    | SOX2 regulated genes in Wounding from PMID: 30772301 | SOX2 |
| SHROOM3   | SOX2 regulated genes in Wounding from PMID: 30772301 | SOX2 |
| RANBP1    | SOX2 regulated genes in Wounding from PMID: 30772301 | SOX2 |
| RIOK1     | SOX2 regulated genes in Wounding from PMID: 30772301 | SOX2 |
| FOXC1     | SOX2 regulated genes in Wounding from PMID: 30772301 | SOX2 |
| AK7       | SOX2 regulated genes in Wounding from PMID: 30772301 | SOX2 |
| CWH43     | SOX2 regulated genes in Wounding from PMID: 30772301 | SOX2 |
| PROSER2   | SOX2 regulated genes in Wounding from PMID: 30772301 | SOX2 |
| PALLD     | SOX2 regulated genes in Wounding from PMID: 30772301 | SOX2 |
| FAM83C    | SOX2 regulated genes in Wounding from PMID: 30772301 | SOX2 |
| TDRD3     | SOX2 regulated genes in Wounding from PMID: 30772301 | SOX2 |
| MAPK11    | SOX2 regulated genes in Wounding from PMID: 30772301 | SOX2 |
| LAMA3     | SOX2 regulated genes in Wounding from PMID: 30772301 | SOX2 |
| AJUBA     | SOX2 regulated genes in Wounding from PMID: 30772301 | SOX2 |
| SERPINB13 | SOX2 regulated genes in Wounding from PMID: 30772301 | SOX2 |
| ABTB2     | SOX2 regulated genes in Wounding from PMID: 30772301 | SOX2 |
| DBNDD2    | SOX2 regulated genes in Wounding from PMID: 30772301 | SOX2 |
| TM9SF3    | SOX2 regulated genes in Wounding from PMID: 30772301 | SOX2 |
| MORF4L2   | SOX2 regulated genes in Wounding from PMID: 30772301 | SOX2 |
| MAPK1     | SOX2 regulated genes in Wounding from PMID: 30772301 | SOX2 |
| DLST      | SOX2 regulated genes in Wounding from PMID: 30772301 | SOX2 |
| SWI5      | SOX2 regulated genes in Wounding from PMID: 30772301 | SOX2 |
| MAGOHB    | SOX2 regulated genes in Wounding from PMID: 30772301 | SOX2 |

|          |                                                      |      |
|----------|------------------------------------------------------|------|
| RAD23B   | SOX2 regulated genes in Wounding from PMID: 30772301 | SOX2 |
| GPRIN3   | SOX2 regulated genes in Wounding from PMID: 30772301 | SOX2 |
| IRX4     | SOX2 regulated genes in Wounding from PMID: 30772301 | SOX2 |
| BMP6     | SOX2 regulated genes in Wounding from PMID: 30772301 | SOX2 |
| NAA35    | SOX2 regulated genes in Wounding from PMID: 30772301 | SOX2 |
| NUS1     | SOX2 regulated genes in Wounding from PMID: 30772301 | SOX2 |
| SUCLA2   | SOX2 regulated genes in Wounding from PMID: 30772301 | SOX2 |
| DSG2     | SOX2 regulated genes in Wounding from PMID: 30772301 | SOX2 |
| CPNE5    | SOX2 regulated genes in Wounding from PMID: 30772301 | SOX2 |
| CRK      | SOX2 regulated genes in Wounding from PMID: 30772301 | SOX2 |
| RCAN1    | SOX2 regulated genes in Wounding from PMID: 30772301 | SOX2 |
| FLNA     | SOX2 regulated genes in Wounding from PMID: 30772301 | SOX2 |
| FJX1     | SOX2 regulated genes in Wounding from PMID: 30772301 | SOX2 |
| B4GALNT3 | SOX2 regulated genes in Wounding from PMID: 30772301 | SOX2 |
| CA12     | SOX2 regulated genes in Wounding from PMID: 30772301 | SOX2 |
| SNX12    | SOX2 regulated genes in Wounding from PMID: 30772301 | SOX2 |
| KCTD9    | SOX2 regulated genes in Wounding from PMID: 30772301 | SOX2 |
| MEOX1    | SOX2 regulated genes in Wounding from PMID: 30772301 | SOX2 |
| FERMT1   | SOX2 regulated genes in Wounding from PMID: 30772301 | SOX2 |
| EDN1     | SOX2 regulated genes in Wounding from PMID: 30772301 | SOX2 |
| PLP2     | SOX2 regulated genes in Wounding from PMID: 30772301 | SOX2 |
| FAM199X  | SOX2 regulated genes in Wounding from PMID: 30772301 | SOX2 |
| L3MBTL1  | SOX2 regulated genes in Wounding from PMID: 30772301 | SOX2 |
| SPRYD3   | SOX2 regulated genes in Wounding from PMID: 30772301 | SOX2 |
| TFIP11   | SOX2 regulated genes in Wounding from PMID: 30772301 | SOX2 |
| GOPC     | SOX2 regulated genes in Wounding from PMID: 30772301 | SOX2 |
| TMEFF1   | SOX2 regulated genes in Wounding from PMID: 30772301 | SOX2 |
| DSC3     | SOX2 regulated genes in Wounding from PMID: 30772301 | SOX2 |
| NFIL3    | SOX2 regulated genes in Wounding from PMID: 30772301 | SOX2 |
| NUDT15   | SOX2 regulated genes in Wounding from PMID: 30772301 | SOX2 |
| ARHGAP1  | SOX2 regulated genes in Wounding from PMID: 30772301 | SOX2 |
| ST8SIA6  | SOX2 regulated genes in Wounding from PMID: 30772301 | SOX2 |
| SLC24A3  | SOX2 regulated genes in Wounding from PMID: 30772301 | SOX2 |
| PAK3     | SOX2 regulated genes in Wounding from PMID: 30772301 | SOX2 |
| PLAGL2   | SOX2 regulated genes in Wounding from PMID: 30772301 | SOX2 |
| LGR4     | SOX2 regulated genes in Wounding from PMID: 30772301 | SOX2 |
| FHOD3    | SOX2 regulated genes in Wounding from PMID: 30772301 | SOX2 |
| SNU13    | SOX2 regulated genes in Wounding from PMID: 30772301 | SOX2 |
| KDM1B    | SOX2 regulated genes in Wounding from PMID: 30772301 | SOX2 |
| GOLGA7B  | SOX2 regulated genes in Wounding from PMID: 30772301 | SOX2 |
| BTBD9    | SOX2 regulated genes in Wounding from PMID: 30772301 | SOX2 |
| CHAC1    | SOX2 regulated genes in Wounding from PMID: 30772301 | SOX2 |
| ID4      | SOX2 regulated genes in Wounding from PMID: 30772301 | SOX2 |
| PPDPF    | SOX2 regulated genes in Wounding from PMID: 30772301 | SOX2 |
| CSTF3    | SOX2 regulated genes in Wounding from PMID: 30772301 | SOX2 |
| RAP1GAP2 | SOX2 regulated genes in Wounding from PMID: 30772301 | SOX2 |
| LMAN1L   | SOX2 regulated genes in Wounding from PMID: 30772301 | SOX2 |
| ANG      | SOX2 regulated genes in Wounding from PMID: 30772301 | SOX2 |
| MED27    | SOX2 regulated genes in Wounding from PMID: 30772301 | SOX2 |
| EIF3A    | SOX2 regulated genes in Wounding from PMID: 30772301 | SOX2 |
| LMTK2    | SOX2 regulated genes in Wounding from PMID: 30772301 | SOX2 |
| SERPINE1 | SOX2 regulated genes in Wounding from PMID: 30772301 | SOX2 |
| ENDOD1   | SOX2 regulated genes in Wounding from PMID: 30772301 | SOX2 |
| DLG5     | SOX2 regulated genes in Wounding from PMID: 30772301 | SOX2 |
| ARIH1    | SOX2 regulated genes in Wounding from PMID: 30772301 | SOX2 |
| SF3A1    | SOX2 regulated genes in Wounding from PMID: 30772301 | SOX2 |
| HSPA4L   | SOX2 regulated genes in Wounding from PMID: 30772301 | SOX2 |
| PPP1R3B  | SOX2 regulated genes in Wounding from PMID: 30772301 | SOX2 |
| PPP2R1B  | SOX2 regulated genes in Wounding from PMID: 30772301 | SOX2 |

|           |                                                      |      |
|-----------|------------------------------------------------------|------|
| NEDD4L    | SOX2 regulated genes in Wounding from PMID: 30772301 | SOX2 |
| IPPK      | SOX2 regulated genes in Wounding from PMID: 30772301 | SOX2 |
| THOC1     | SOX2 regulated genes in Wounding from PMID: 30772301 | SOX2 |
| OVOL2     | SOX2 regulated genes in Wounding from PMID: 30772301 | SOX2 |
| LEPROTL1  | SOX2 regulated genes in Wounding from PMID: 30772301 | SOX2 |
| TCEAL3    | SOX2 regulated genes in Wounding from PMID: 30772301 | SOX2 |
| SLC30A9   | SOX2 regulated genes in Wounding from PMID: 30772301 | SOX2 |
| CHIC2     | SOX2 regulated genes in Wounding from PMID: 30772301 | SOX2 |
| DSG1      | SOX2 regulated genes in Wounding from PMID: 30772301 | SOX2 |
| PRDM1     | SOX2 regulated genes in Wounding from PMID: 30772301 | SOX2 |
| LIN7C     | SOX2 regulated genes in Wounding from PMID: 30772301 | SOX2 |
| COL17A1   | SOX2 regulated genes in Wounding from PMID: 30772301 | SOX2 |
| GCH1      | SOX2 regulated genes in Wounding from PMID: 30772301 | SOX2 |
| LONRF1    | SOX2 regulated genes in Wounding from PMID: 30772301 | SOX2 |
| EVC2      | SOX2 regulated genes in Wounding from PMID: 30772301 | SOX2 |
| MUC15     | SOX2 regulated genes in Wounding from PMID: 30772301 | SOX2 |
| MYO1E     | SOX2 regulated genes in Wounding from PMID: 30772301 | SOX2 |
| BTC       | SOX2 regulated genes in Wounding from PMID: 30772301 | SOX2 |
| BCORL1    | SOX2 regulated genes in Wounding from PMID: 30772301 | SOX2 |
| PDCL      | SOX2 regulated genes in Wounding from PMID: 30772301 | SOX2 |
| C15orf62  | SOX2 regulated genes in Wounding from PMID: 30772301 | SOX2 |
| CRNKL1    | SOX2 regulated genes in Wounding from PMID: 30772301 | SOX2 |
| RRP7A     | SOX2 regulated genes in Wounding from PMID: 30772301 | SOX2 |
| PLEKHA7   | SOX2 regulated genes in Wounding from PMID: 30772301 | SOX2 |
| COBL      | SOX2 regulated genes in Wounding from PMID: 30772301 | SOX2 |
| BCOR      | SOX2 regulated genes in Wounding from PMID: 30772301 | SOX2 |
| GPAT3     | SOX2 regulated genes in Wounding from PMID: 30772301 | SOX2 |
| CTDP1     | SOX2 regulated genes in Wounding from PMID: 30772301 | SOX2 |
| DHX32     | SOX2 regulated genes in Wounding from PMID: 30772301 | SOX2 |
| SLK       | SOX2 regulated genes in Wounding from PMID: 30772301 | SOX2 |
| CSTF2     | SOX2 regulated genes in Wounding from PMID: 30772301 | SOX2 |
| LIG3      | SOX2 regulated genes in Wounding from PMID: 30772301 | SOX2 |
| EEF1G     | SOX2 regulated genes in Wounding from PMID: 30772301 | SOX2 |
| CFAP46    | SOX2 regulated genes in Wounding from PMID: 30772301 | SOX2 |
| PPP1R14C  | SOX2 regulated genes in Wounding from PMID: 30772301 | SOX2 |
| STK26     | SOX2 regulated genes in Wounding from PMID: 30772301 | SOX2 |
| MEI1      | SOX2 regulated genes in Wounding from PMID: 30772301 | SOX2 |
| TLL1      | SOX2 regulated genes in Wounding from PMID: 30772301 | SOX2 |
| TMTC4     | SOX2 regulated genes in Wounding from PMID: 30772301 | SOX2 |
| GTF2E2    | SOX2 regulated genes in Wounding from PMID: 30772301 | SOX2 |
| RHOD      | SOX2 regulated genes in Wounding from PMID: 30772301 | SOX2 |
| HEPHL1    | SOX2 regulated genes in Wounding from PMID: 30772301 | SOX2 |
| ERVFRD-1  | SOX2 regulated genes in Wounding from PMID: 30772301 | SOX2 |
| RAB11FIP1 | SOX2 regulated genes in Wounding from PMID: 30772301 | SOX2 |
| MAPRE1    | SOX2 regulated genes in Wounding from PMID: 30772301 | SOX2 |
| CDCA4     | SOX2 regulated genes in Wounding from PMID: 30772301 | SOX2 |
| USP22     | SOX2 regulated genes in Wounding from PMID: 30772301 | SOX2 |
| TOP1      | SOX2 regulated genes in Wounding from PMID: 30772301 | SOX2 |
| TSPAN14   | SOX2 regulated genes in Wounding from PMID: 30772301 | SOX2 |
| TTPAL     | SOX2 regulated genes in Wounding from PMID: 30772301 | SOX2 |
| VPS4B     | SOX2 regulated genes in Wounding from PMID: 30772301 | SOX2 |
| XPNPEP1   | SOX2 regulated genes in Wounding from PMID: 30772301 | SOX2 |
| ZMYM5     | SOX2 regulated genes in Wounding from PMID: 30772301 | SOX2 |
| WIPF2     | SOX2 regulated genes in Wounding from PMID: 30772301 | SOX2 |
| UTP14A    | SOX2 regulated genes in Wounding from PMID: 30772301 | SOX2 |
| ZNF407    | SOX2 regulated genes in Wounding from PMID: 30772301 | SOX2 |
| TOLLIP    | SOX2 regulated genes in Wounding from PMID: 30772301 | SOX2 |
| USP6      | SOX2 regulated genes in Wounding from PMID: 30772301 | SOX2 |
| TOM1      | SOX2 regulated genes in Wounding from PMID: 30772301 | SOX2 |



|          |                                                      |      |
|----------|------------------------------------------------------|------|
| TRPM6    | SOX2 regulated genes in Wounding from PMID: 30772301 | SOX2 |
| ZFAND2A  | SOX2 regulated genes in Wounding from PMID: 30772301 | SOX2 |
| UBE2A    | SOX2 regulated genes in Wounding from PMID: 30772301 | SOX2 |
| TUBB6    | SOX2 regulated genes in Wounding from PMID: 30772301 | SOX2 |
| TRIM29   | SOX2 regulated genes in Wounding from PMID: 30772301 | SOX2 |
| ZGPAT    | SOX2 regulated genes in Wounding from PMID: 30772301 | SOX2 |
| ZMYND19  | SOX2 regulated genes in Wounding from PMID: 30772301 | SOX2 |
| YWHAH    | SOX2 regulated genes in Wounding from PMID: 30772301 | SOX2 |
| TULP3    | SOX2 regulated genes in Wounding from PMID: 30772301 | SOX2 |
| TRIL     | SOX2 regulated genes in Wounding from PMID: 30772301 | SOX2 |
| TRAPPC8  | SOX2 regulated genes in Wounding from PMID: 30772301 | SOX2 |
| ZNF532   | SOX2 regulated genes in Wounding from PMID: 30772301 | SOX2 |
| YAP1     | SOX2 regulated genes in Wounding from PMID: 30772301 | SOX2 |
| ULK3     | SOX2 regulated genes in Wounding from PMID: 30772301 | SOX2 |
| TXNDC5   | SOX2 regulated genes in Wounding from PMID: 30772301 | SOX2 |
| WBP4     | SOX2 regulated genes in Wounding from PMID: 30772301 | SOX2 |
| ZDHHC13  | SOX2 regulated genes in Wounding from PMID: 30772301 | SOX2 |
| TSPAN9   | SOX2 regulated genes in Wounding from PMID: 30772301 | SOX2 |
| TSPAN6   | SOX2 regulated genes in Wounding from PMID: 30772301 | SOX2 |
| UNC5B    | SOX2 regulated genes in Wounding from PMID: 30772301 | SOX2 |
| UMODL1   | SOX2 regulated genes in Wounding from PMID: 30772301 | SOX2 |
| TXNDC17  | SOX2 regulated genes in Wounding from PMID: 30772301 | SOX2 |
| TOMM22   | SOX2 regulated genes in Wounding from PMID: 30772301 | SOX2 |
| ZDHHC9   | SOX2 regulated genes in Wounding from PMID: 30772301 | SOX2 |
| ZNRF2    | SOX2 regulated genes in Wounding from PMID: 30772301 | SOX2 |
| AFAP1    | SOX2 regulated genes in Wounding from PMID: 30772301 | SOX2 |
| CCDC112  | SOX2 regulated genes in Wounding from PMID: 30772301 | SOX2 |
| SYNE2    | SOX2 regulated genes in Wounding from PMID: 30772301 | SOX2 |
| FHDC1    | SOX2 regulated genes in Wounding from PMID: 30772301 | SOX2 |
| CCNC     | SOX2 regulated genes in Wounding from PMID: 30772301 | SOX2 |
| SOCS5    | SOX2 regulated genes in Wounding from PMID: 30772301 | SOX2 |
| NAP1L4   | SOX2 regulated genes in Wounding from PMID: 30772301 | SOX2 |
| ITGA3    | SOX2 regulated genes in Wounding from PMID: 30772301 | SOX2 |
| CLIC3    | SOX2 regulated genes in Wounding from PMID: 30772301 | SOX2 |
| SERPINA1 | SOX2 regulated genes in Wounding from PMID: 30772301 | SOX2 |
| AEBP2    | SOX2 regulated genes in Wounding from PMID: 30772301 | SOX2 |
| EFCAB1   | SOX2 regulated genes in Wounding from PMID: 30772301 | SOX2 |
| MSANTD3  | SOX2 regulated genes in Wounding from PMID: 30772301 | SOX2 |
| DNAJB13  | SOX2 regulated genes in Wounding from PMID: 30772301 | SOX2 |
| NCS1     | SOX2 regulated genes in Wounding from PMID: 30772301 | SOX2 |
| NOTCH1   | SOX2 regulated genes in Wounding from PMID: 30772301 | SOX2 |
| NUP62CL  | SOX2 regulated genes in Wounding from PMID: 30772301 | SOX2 |
| SMARCE1  | SOX2 regulated genes in Wounding from PMID: 30772301 | SOX2 |
| GDPD5    | SOX2 regulated genes in Wounding from PMID: 30772301 | SOX2 |
| CD151    | SOX2 regulated genes in Wounding from PMID: 30772301 | SOX2 |
| MGAT4A   | SOX2 regulated genes in Wounding from PMID: 30772301 | SOX2 |
| FAM135A  | SOX2 regulated genes in Wounding from PMID: 30772301 | SOX2 |
| BEGAIN   | SOX2 regulated genes in Wounding from PMID: 30772301 | SOX2 |
| CDK17    | SOX2 regulated genes in Wounding from PMID: 30772301 | SOX2 |
| BRAF     | SOX2 regulated genes in Wounding from PMID: 30772301 | SOX2 |
| ZNF597   | SOX2 regulated genes in Wounding from PMID: 30772301 | SOX2 |
| UTP14C   | SOX2 regulated genes in Wounding from PMID: 30772301 | SOX2 |
| KRTAP9-4 | SOX2 regulated genes in Wounding from PMID: 30772301 | SOX2 |
| EFL1     | SOX2 regulated genes in Wounding from PMID: 30772301 | SOX2 |
| RHBDL2   | SOX2 regulated genes in Wounding from PMID: 30772301 | SOX2 |
| UBE2N    | SOX2 regulated genes in Wounding from PMID: 30772301 | SOX2 |
| WAPL     | SOX2 regulated genes in Wounding from PMID: 30772301 | SOX2 |
| CTNNB1   | SOX2 regulated genes in Wounding from PMID: 30772301 | SOX2 |
| SHB      | SOX2 regulated genes in Wounding from PMID: 30772301 | SOX2 |

|          |                                                      |      |
|----------|------------------------------------------------------|------|
| MYH9     | SOX2 regulated genes in Wounding from PMID: 30772301 | SOX2 |
| SERINC2  | SOX2 regulated genes in Wounding from PMID: 30772301 | SOX2 |
| ZNF664   | SOX2 regulated genes in Wounding from PMID: 30772301 | SOX2 |
| OSBPL5   | SOX2 regulated genes in Wounding from PMID: 30772301 | SOX2 |
| VPS35    | SOX2 regulated genes in Wounding from PMID: 30772301 | SOX2 |
| SNX18    | SOX2 regulated genes in Wounding from PMID: 30772301 | SOX2 |
| ATP11A   | SOX2 regulated genes in Wounding from PMID: 30772301 | SOX2 |
| PRSS8    | SOX2 regulated genes in Wounding from PMID: 30772301 | SOX2 |
| CPEB4    | SOX2 regulated genes in Wounding from PMID: 30772301 | SOX2 |
| PLEK2    | SOX2 regulated genes in Wounding from PMID: 30772301 | SOX2 |
| BICDL2   | SOX2 regulated genes in Wounding from PMID: 30772301 | SOX2 |
| LEO1     | SOX2 regulated genes in Wounding from PMID: 30772301 | SOX2 |
| NOCT     | SOX2 regulated genes in Wounding from PMID: 30772301 | SOX2 |
| UBAP1    | SOX2 regulated genes in Wounding from PMID: 30772301 | SOX2 |
| RAB23    | SOX2 regulated genes in Wounding from PMID: 30772301 | SOX2 |
| GUCA1B   | SOX2 regulated genes in Wounding from PMID: 30772301 | SOX2 |
| ZDHHC5   | SOX2 regulated genes in Wounding from PMID: 30772301 | SOX2 |
| BTBD11   | SOX2 regulated genes in Wounding from PMID: 30772301 | SOX2 |
| NCOR2    | SOX2 regulated genes in Wounding from PMID: 30772301 | SOX2 |
| TMEM51   | SOX2 regulated genes in Wounding from PMID: 30772301 | SOX2 |
| TGFA     | SOX2 regulated genes in Wounding from PMID: 30772301 | SOX2 |
| LPAR6    | SOX2 regulated genes in Wounding from PMID: 30772301 | SOX2 |
| MPHOSPH6 | SOX2 regulated genes in Wounding from PMID: 30772301 | SOX2 |
| MICB     | SOX2 regulated genes in Wounding from PMID: 30772301 | SOX2 |
| SLC39A4  | SOX2 regulated genes in Wounding from PMID: 30772301 | SOX2 |
| TMEM151A | SOX2 regulated genes in Wounding from PMID: 30772301 | SOX2 |
| TPM4     | SOX2 regulated genes in Wounding from PMID: 30772301 | SOX2 |
| DGKA     | SOX2 regulated genes in Wounding from PMID: 30772301 | SOX2 |
| TGM7     | SOX2 regulated genes in Wounding from PMID: 30772301 | SOX2 |
| DDX17    | SOX2 regulated genes in Wounding from PMID: 30772301 | SOX2 |
| ZNF365   | SOX2 regulated genes in Wounding from PMID: 30772301 | SOX2 |
| KAZN     | SOX2 regulated genes in Wounding from PMID: 30772301 | SOX2 |
| CD2BP2   | SOX2 regulated genes in Wounding from PMID: 30772301 | SOX2 |
| BMP3     | SOX2 regulated genes in Wounding from PMID: 30772301 | SOX2 |
| GNL2     | SOX2 regulated genes in Wounding from PMID: 30772301 | SOX2 |
| SFR1     | SOX2 regulated genes in Wounding from PMID: 30772301 | SOX2 |
| AREG     | SOX2 regulated genes in Wounding from PMID: 30772301 | SOX2 |
| DUSP5    | SOX2 regulated genes in Wounding from PMID: 30772301 | SOX2 |
| CUX1     | SOX2 regulated genes in Wounding from PMID: 30772301 | SOX2 |
| CPE      | SOX2 regulated genes in Wounding from PMID: 30772301 | SOX2 |
| ESRP2    | SOX2 regulated genes in Wounding from PMID: 30772301 | SOX2 |
| CA9      | SOX2 regulated genes in Wounding from PMID: 30772301 | SOX2 |
| PRKCH    | SOX2 regulated genes in Wounding from PMID: 30772301 | SOX2 |
| PAK1     | SOX2 regulated genes in Wounding from PMID: 30772301 | SOX2 |
| CPA4     | SOX2 regulated genes in Wounding from PMID: 30772301 | SOX2 |
| SNAI2    | SOX2 regulated genes in Wounding from PMID: 30772301 | SOX2 |
| DNAJB6   | SOX2 regulated genes in Wounding from PMID: 30772301 | SOX2 |
| BAG2     | SOX2 regulated genes in Wounding from PMID: 30772301 | SOX2 |
| KRT72    | SOX2 regulated genes in Wounding from PMID: 30772301 | SOX2 |
| DDX18    | SOX2 regulated genes in Wounding from PMID: 30772301 | SOX2 |
| PUM3     | SOX2 regulated genes in Wounding from PMID: 30772301 | SOX2 |
| REPS1    | SOX2 regulated genes in Wounding from PMID: 30772301 | SOX2 |
| CDK4     | SOX2 regulated genes in Wounding from PMID: 30772301 | SOX2 |
| FBXW8    | SOX2 regulated genes in Wounding from PMID: 30772301 | SOX2 |
| HAS2     | SOX2 regulated genes in Wounding from PMID: 30772301 | SOX2 |
| SYNJ2    | SOX2 regulated genes in Wounding from PMID: 30772301 | SOX2 |
| FHL2     | SOX2 regulated genes in Wounding from PMID: 30772301 | SOX2 |
| GALR3    | SOX2 regulated genes in Wounding from PMID: 30772301 | SOX2 |
| PPP1R37  | SOX2 regulated genes in Wounding from PMID: 30772301 | SOX2 |

|           |                                                      |      |
|-----------|------------------------------------------------------|------|
| UBE2Z     | SOX2 regulated genes in Wounding from PMID: 30772301 | SOX2 |
| RIOX2     | SOX2 regulated genes in Wounding from PMID: 30772301 | SOX2 |
| MAPKAPK3  | SOX2 regulated genes in Wounding from PMID: 30772301 | SOX2 |
| STRBP     | SOX2 regulated genes in Wounding from PMID: 30772301 | SOX2 |
| TENM4     | SOX2 regulated genes in Wounding from PMID: 30772301 | SOX2 |
| PARD3     | SOX2 regulated genes in Wounding from PMID: 30772301 | SOX2 |
| ST3GAL2   | SOX2 regulated genes in Wounding from PMID: 30772301 | SOX2 |
| TRIP6     | SOX2 regulated genes in Wounding from PMID: 30772301 | SOX2 |
| KLC2      | SOX2 regulated genes in Wounding from PMID: 30772301 | SOX2 |
| SRD5A2    | SOX2 regulated genes in Wounding from PMID: 30772301 | SOX2 |
| STX1A     | SOX2 regulated genes in Wounding from PMID: 30772301 | SOX2 |
| SLC5A5    | SOX2 regulated genes in Wounding from PMID: 30772301 | SOX2 |
| SCX       | SOX2 regulated genes in Wounding from PMID: 30772301 | SOX2 |
| TGM6      | SOX2 regulated genes in Wounding from PMID: 30772301 | SOX2 |
| TMC7      | SOX2 regulated genes in Wounding from PMID: 30772301 | SOX2 |
| SIPA1L3   | SOX2 regulated genes in Wounding from PMID: 30772301 | SOX2 |
| OTUD6B    | SOX2 regulated genes in Wounding from PMID: 30772301 | SOX2 |
| TMEM163   | SOX2 regulated genes in Wounding from PMID: 30772301 | SOX2 |
| GPSM1     | SOX2 regulated genes in Wounding from PMID: 30772301 | SOX2 |
| FSCN1     | SOX2 regulated genes in Wounding from PMID: 30772301 | SOX2 |
| ATP6V1C2  | SOX2 regulated genes in Wounding from PMID: 30772301 | SOX2 |
| NDFIP2    | SOX2 regulated genes in Wounding from PMID: 30772301 | SOX2 |
| EEF1AKMT1 | SOX2 regulated genes in Wounding from PMID: 30772301 | SOX2 |
| SKIL      | SOX2 regulated genes in Wounding from PMID: 30772301 | SOX2 |
| USP20     | SOX2 regulated genes in Wounding from PMID: 30772301 | SOX2 |
| SMDT1     | SOX2 regulated genes in Wounding from PMID: 30772301 | SOX2 |
| IFITM10   | SOX2 regulated genes in Wounding from PMID: 30772301 | SOX2 |
| RAB18     | SOX2 regulated genes in Wounding from PMID: 30772301 | SOX2 |
| STARD4    | SOX2 regulated genes in Wounding from PMID: 30772301 | SOX2 |
| ANKRD6    | SOX2 regulated genes in Wounding from PMID: 30772301 | SOX2 |
| EGR4      | SOX2 regulated genes in Wounding from PMID: 30772301 | SOX2 |
| FZD6      | SOX2 regulated genes in Wounding from PMID: 30772301 | SOX2 |
| CRB3      | SOX2 regulated genes in Wounding from PMID: 30772301 | SOX2 |
| CDKN2AIP  | SOX2 regulated genes in Wounding from PMID: 30772301 | SOX2 |
| PHLDB2    | SOX2 regulated genes in Wounding from PMID: 30772301 | SOX2 |
| TMTC3     | SOX2 regulated genes in Wounding from PMID: 30772301 | SOX2 |
| EPPK1     | SOX2 regulated genes in Wounding from PMID: 30772301 | SOX2 |
| SLC7A6    | SOX2 regulated genes in Wounding from PMID: 30772301 | SOX2 |
| LAP3      | SOX2 regulated genes in Wounding from PMID: 30772301 | SOX2 |
| ARHGEF16  | SOX2 regulated genes in Wounding from PMID: 30772301 | SOX2 |
| SSRP1     | SOX2 regulated genes in Wounding from PMID: 30772301 | SOX2 |
| MSX2      | SOX2 regulated genes in Wounding from PMID: 30772301 | SOX2 |
| BTBD10    | SOX2 regulated genes in Wounding from PMID: 30772301 | SOX2 |
| LRRFIP2   | SOX2 regulated genes in Wounding from PMID: 30772301 | SOX2 |
| GGACT     | SOX2 regulated genes in Wounding from PMID: 30772301 | SOX2 |
| SLC30A4   | SOX2 regulated genes in Wounding from PMID: 30772301 | SOX2 |
| SMYD5     | SOX2 regulated genes in Wounding from PMID: 30772301 | SOX2 |
| TUBB4B    | SOX2 regulated genes in Wounding from PMID: 30772301 | SOX2 |
| STIM2     | SOX2 regulated genes in Wounding from PMID: 30772301 | SOX2 |
| EIF4A1    | SOX2 regulated genes in Wounding from PMID: 30772301 | SOX2 |
| ANPEP     | SOX2 regulated genes in Wounding from PMID: 30772301 | SOX2 |
| SERINC5   | SOX2 regulated genes in Wounding from PMID: 30772301 | SOX2 |
| SCRG1     | SOX2 regulated genes in Wounding from PMID: 30772301 | SOX2 |
| SH3BGRL2  | SOX2 regulated genes in Wounding from PMID: 30772301 | SOX2 |
| HYAL2     | SOX2 regulated genes in Wounding from PMID: 30772301 | SOX2 |
| GDE1      | SOX2 regulated genes in Wounding from PMID: 30772301 | SOX2 |
| CHD7      | SOX2 regulated genes in Wounding from PMID: 30772301 | SOX2 |
| ARL1      | SOX2 regulated genes in Wounding from PMID: 30772301 | SOX2 |
| NIM1K     | SOX2 regulated genes in Wounding from PMID: 30772301 | SOX2 |

|           |                                                      |      |
|-----------|------------------------------------------------------|------|
| EIF3CL    | SOX2 regulated genes in Wounding from PMID: 30772301 | SOX2 |
| EIF3C     | SOX2 regulated genes in Wounding from PMID: 30772301 | SOX2 |
| SURF6     | SOX2 regulated genes in Wounding from PMID: 30772301 | SOX2 |
| ESRP1     | SOX2 regulated genes in Wounding from PMID: 30772301 | SOX2 |
| NAA15     | SOX2 regulated genes in Wounding from PMID: 30772301 | SOX2 |
| SMURF1    | SOX2 regulated genes in Wounding from PMID: 30772301 | SOX2 |
| FTSJ3     | SOX2 regulated genes in Wounding from PMID: 30772301 | SOX2 |
| RABL2B    | SOX2 regulated genes in Wounding from PMID: 30772301 | SOX2 |
| LPAR2     | SOX2 regulated genes in Wounding from PMID: 30772301 | SOX2 |
| ZCCHC7    | SOX2 regulated genes in Wounding from PMID: 30772301 | SOX2 |
| KLHL25    | SOX2 regulated genes in Wounding from PMID: 30772301 | SOX2 |
| GRIPAP1   | SOX2 regulated genes in Wounding from PMID: 30772301 | SOX2 |
| NBN       | SOX2 regulated genes in Wounding from PMID: 30772301 | SOX2 |
| LGALS3    | SOX2 regulated genes in Wounding from PMID: 30772301 | SOX2 |
| TMF1      | SOX2 regulated genes in Wounding from PMID: 30772301 | SOX2 |
| DZIP1L    | SOX2 regulated genes in Wounding from PMID: 30772301 | SOX2 |
| TUBB      | SOX2 regulated genes in Wounding from PMID: 30772301 | SOX2 |
| ZNF274    | SOX2 regulated genes in Wounding from PMID: 30772301 | SOX2 |
| GDNF      | SOX2 regulated genes in Wounding from PMID: 30772301 | SOX2 |
| MIA-RAB4B | SOX2 regulated genes in Wounding from PMID: 30772301 | SOX2 |
| MIA       | SOX2 regulated genes in Wounding from PMID: 30772301 | SOX2 |
| VPS36     | SOX2 regulated genes in Wounding from PMID: 30772301 | SOX2 |
| MATN3     | SOX2 regulated genes in Wounding from PMID: 30772301 | SOX2 |
| DCBLD1    | SOX2 regulated genes in Wounding from PMID: 30772301 | SOX2 |
| CLDN12    | SOX2 regulated genes in Wounding from PMID: 30772301 | SOX2 |
| CST6      | SOX2 regulated genes in Wounding from PMID: 30772301 | SOX2 |
| EIF2S3    | SOX2 regulated genes in Wounding from PMID: 30772301 | SOX2 |
| MAGEL2    | SOX2 regulated genes in Wounding from PMID: 30772301 | SOX2 |
| GALNT14   | SOX2 regulated genes in Wounding from PMID: 30772301 | SOX2 |
| YKT6      | SOX2 regulated genes in Wounding from PMID: 30772301 | SOX2 |
| WNK2      | SOX2 regulated genes in Wounding from PMID: 30772301 | SOX2 |
| TUBB2A    | SOX2 regulated genes in Wounding from PMID: 30772301 | SOX2 |
| EOGT      | SOX2 regulated genes in Wounding from PMID: 30772301 | SOX2 |
| ERCC6     | SOX2 regulated genes in Wounding from PMID: 30772301 | SOX2 |
| ZDHHC21   | SOX2 regulated genes in Wounding from PMID: 30772301 | SOX2 |
| TUBA1B    | SOX2 regulated genes in Wounding from PMID: 30772301 | SOX2 |
| GDF7      | SOX2 regulated genes in Wounding from PMID: 30772301 | SOX2 |
| IL6       | SOX2 regulated genes in Wounding from PMID: 30772301 | SOX2 |
| PADI4     | SOX2 regulated genes in Wounding from PMID: 30772301 | SOX2 |
| THSD1     | SOX2 regulated genes in Wounding from PMID: 30772301 | SOX2 |
| EIF2S1    | SOX2 regulated genes in Wounding from PMID: 30772301 | SOX2 |
| RHPN2     | SOX2 regulated genes in Wounding from PMID: 30772301 | SOX2 |
| ZC3H15    | SOX2 regulated genes in Wounding from PMID: 30772301 | SOX2 |
| FAM156A   | SOX2 regulated genes in Wounding from PMID: 30772301 | SOX2 |
| UHRF1BP1L | SOX2 regulated genes in Wounding from PMID: 30772301 | SOX2 |
| TAB3      | SOX2 regulated genes in Wounding from PMID: 30772301 | SOX2 |
| TAF4      | SOX2 regulated genes in Wounding from PMID: 30772301 | SOX2 |
| PPP1CA    | SOX2 regulated genes in Wounding from PMID: 30772301 | SOX2 |
| CYP21A2   | SOX2 regulated genes in Wounding from PMID: 30772301 | SOX2 |
| CDSN      | SOX2 regulated genes in Wounding from PMID: 30772301 | SOX2 |
| TUBB2B    | SOX2 regulated genes in Wounding from PMID: 30772301 | SOX2 |
| BHLHB9    | SOX2 regulated genes in Wounding from PMID: 30772301 | SOX2 |
| RNF19A    | SOX2 regulated genes in Wounding from PMID: 30772301 | SOX2 |
| SPATS2    | SOX2 regulated genes in Wounding from PMID: 30772301 | SOX2 |
| ARHGEF26  | SOX2 regulated genes in Wounding from PMID: 30772301 | SOX2 |
| NAB2      | SOX2 regulated genes in Wounding from PMID: 30772301 | SOX2 |
| CABLES2   | SOX2 regulated genes in Wounding from PMID: 30772301 | SOX2 |
| CREG2     | SOX2 regulated genes in Wounding from PMID: 30772301 | SOX2 |
| MTHFD2L   | SOX2 regulated genes in Wounding from PMID: 30772301 | SOX2 |

|           |                                                      |      |
|-----------|------------------------------------------------------|------|
| RNF185    | SOX2 regulated genes in Wounding from PMID: 30772301 | SOX2 |
| PKP3      | SOX2 regulated genes in Wounding from PMID: 30772301 | SOX2 |
| GNL3L     | SOX2 regulated genes in Wounding from PMID: 30772301 | SOX2 |
| ATF4      | SOX2 regulated genes in Wounding from PMID: 30772301 | SOX2 |
| GJB6      | SOX2 regulated genes in Wounding from PMID: 30772301 | SOX2 |
| CRIP2     | SOX2 regulated genes in Wounding from PMID: 30772301 | SOX2 |
| MAEA      | SOX2 regulated genes in Wounding from PMID: 30772301 | SOX2 |
| USP38     | SOX2 regulated genes in Wounding from PMID: 30772301 | SOX2 |
| COL4A6    | SOX2 regulated genes in Wounding from PMID: 30772301 | SOX2 |
| ILDR1     | SOX2 regulated genes in Wounding from PMID: 30772301 | SOX2 |
| MET       | SOX2 regulated genes in Wounding from PMID: 30772301 | SOX2 |
| MRPL48    | SOX2 regulated genes in Wounding from PMID: 30772301 | SOX2 |
| ZNF507    | SOX2 regulated genes in Wounding from PMID: 30772301 | SOX2 |
| OXSR1     | SOX2 regulated genes in Wounding from PMID: 30772301 | SOX2 |
| PTBP3     | SOX2 regulated genes in Wounding from PMID: 30772301 | SOX2 |
| GIPC1     | SOX2 regulated genes in Wounding from PMID: 30772301 | SOX2 |
| ADD2      | SOX2 regulated genes in Wounding from PMID: 30772301 | SOX2 |
| FBXW7     | SOX2 regulated genes in Wounding from PMID: 30772301 | SOX2 |
| TRAPPC13  | SOX2 regulated genes in Wounding from PMID: 30772301 | SOX2 |
| MARK3     | SOX2 regulated genes in Wounding from PMID: 30772301 | SOX2 |
| HNRNPA2B1 | SOX2 regulated genes in Wounding from PMID: 30772301 | SOX2 |
| ZBTB44    | SOX2 regulated genes in Wounding from PMID: 30772301 | SOX2 |
| BAMBI     | SOX2 regulated genes in Wounding from PMID: 30772301 | SOX2 |
| CEACAM21  | SOX2 regulated genes in Wounding from PMID: 30772301 | SOX2 |
| WASF1     | SOX2 regulated genes in Wounding from PMID: 30772301 | SOX2 |
| CTNS      | SOX2 regulated genes in Wounding from PMID: 30772301 | SOX2 |
| PELO      | SOX2 regulated genes in Wounding from PMID: 30772301 | SOX2 |
| UBE4B     | SOX2 regulated genes in Wounding from PMID: 30772301 | SOX2 |
| PDZD7     | SOX2 regulated genes in Wounding from PMID: 30772301 | SOX2 |
| CNKSR1    | SOX2 regulated genes in Wounding from PMID: 30772301 | SOX2 |
| GALT      | SOX2 regulated genes in Wounding from PMID: 30772301 | SOX2 |
| METAP2    | SOX2 regulated genes in Wounding from PMID: 30772301 | SOX2 |
| PLSCR3    | SOX2 regulated genes in Wounding from PMID: 30772301 | SOX2 |
| ABCE1     | SOX2 regulated genes in Wounding from PMID: 30772301 | SOX2 |
| RAB6A     | SOX2 regulated genes in Wounding from PMID: 30772301 | SOX2 |
| CMTM8     | SOX2 regulated genes in Wounding from PMID: 30772301 | SOX2 |
| FCHSD1    | SOX2 regulated genes in Wounding from PMID: 30772301 | SOX2 |
| CRIM1     | SOX2 regulated genes in Wounding from PMID: 30772301 | SOX2 |
| JUP       | SOX2 regulated genes in Wounding from PMID: 30772301 | SOX2 |
| GRHL2     | SOX2 regulated genes in Wounding from PMID: 30772301 | SOX2 |
| HSPA1A    | SOX2 regulated genes in Wounding from PMID: 30772301 | SOX2 |
| HSPA1B    | SOX2 regulated genes in Wounding from PMID: 30772301 | SOX2 |
| NEBL      | SOX2 regulated genes in Wounding from PMID: 30772301 | SOX2 |
| FBLIM1    | SOX2 regulated genes in Wounding from PMID: 30772301 | SOX2 |
| SHISA2    | SOX2 regulated genes in Wounding from PMID: 30772301 | SOX2 |
| PPFIA1    | SOX2 regulated genes in Wounding from PMID: 30772301 | SOX2 |
| UCP2      | SOX2 regulated genes in Wounding from PMID: 30772301 | SOX2 |
| COPS5     | SOX2 regulated genes in Wounding from PMID: 30772301 | SOX2 |
| DAPK2     | SOX2 regulated genes in Wounding from PMID: 30772301 | SOX2 |
| ESYT3     | SOX2 regulated genes in Wounding from PMID: 30772301 | SOX2 |
| CDK12     | SOX2 regulated genes in Wounding from PMID: 30772301 | SOX2 |
| BASP1     | SOX2 regulated genes in Wounding from PMID: 30772301 | SOX2 |
| MAP3K5    | SOX2 regulated genes in Wounding from PMID: 30772301 | SOX2 |
| AP3M1     | SOX2 regulated genes in Wounding from PMID: 30772301 | SOX2 |
| CNPY4     | SOX2 regulated genes in Wounding from PMID: 30772301 | SOX2 |
| PFKP      | SOX2 regulated genes in Wounding from PMID: 30772301 | SOX2 |
| PXDC1     | SOX2 regulated genes in Wounding from PMID: 30772301 | SOX2 |
| EHD3      | SOX2 regulated genes in Wounding from PMID: 30772301 | SOX2 |
| EXOSC3    | SOX2 regulated genes in Wounding from PMID: 30772301 | SOX2 |

|              |                                                      |      |
|--------------|------------------------------------------------------|------|
| BCL2L2       | SOX2 regulated genes in Wounding from PMID: 30772301 | SOX2 |
| PPP4C        | SOX2 regulated genes in Wounding from PMID: 30772301 | SOX2 |
| SRF          | SOX2 regulated genes in Wounding from PMID: 30772301 | SOX2 |
| BCAR3        | SOX2 regulated genes in Wounding from PMID: 30772301 | SOX2 |
| ATP8A2       | SOX2 regulated genes in Wounding from PMID: 30772301 | SOX2 |
| RCN1         | SOX2 regulated genes in Wounding from PMID: 30772301 | SOX2 |
| ALCAM        | SOX2 regulated genes in Wounding from PMID: 30772301 | SOX2 |
| HYAL4        | SOX2 regulated genes in Wounding from PMID: 30772301 | SOX2 |
| RFLNA        | SOX2 regulated genes in Wounding from PMID: 30772301 | SOX2 |
| TNIK         | SOX2 regulated genes in Wounding from PMID: 30772301 | SOX2 |
| DMTF1        | SOX2 regulated genes in Wounding from PMID: 30772301 | SOX2 |
| RIN1         | SOX2 regulated genes in Wounding from PMID: 30772301 | SOX2 |
| CALML3       | SOX2 regulated genes in Wounding from PMID: 30772301 | SOX2 |
| MREG         | SOX2 regulated genes in Wounding from PMID: 30772301 | SOX2 |
| YWHAG        | SOX2 regulated genes in Wounding from PMID: 30772301 | SOX2 |
| GPC2         | SOX2 regulated genes in Wounding from PMID: 30772301 | SOX2 |
| UBE2D3       | SOX2 regulated genes in Wounding from PMID: 30772301 | SOX2 |
| FZD1         | SOX2 regulated genes in Wounding from PMID: 30772301 | SOX2 |
| BARX2        | SOX2 regulated genes in Wounding from PMID: 30772301 | SOX2 |
| SLC22A23     | SOX2 regulated genes in Wounding from PMID: 30772301 | SOX2 |
| TNKS1BP1     | SOX2 regulated genes in Wounding from PMID: 30772301 | SOX2 |
| WNT10B       | SOX2 regulated genes in Wounding from PMID: 30772301 | SOX2 |
| CCR4         | SOX2 regulated genes in Wounding from PMID: 30772301 | SOX2 |
| DAAM1        | SOX2 regulated genes in Wounding from PMID: 30772301 | SOX2 |
| HCFC2        | SOX2 regulated genes in Wounding from PMID: 30772301 | SOX2 |
| MTERF4       | SOX2 regulated genes in Wounding from PMID: 30772301 | SOX2 |
| ATP10B       | SOX2 regulated genes in Wounding from PMID: 30772301 | SOX2 |
| TMPRSS13     | SOX2 regulated genes in Wounding from PMID: 30772301 | SOX2 |
| TACSTD2      | SOX2 regulated genes in Wounding from PMID: 30772301 | SOX2 |
| TRPV6        | SOX2 regulated genes in Wounding from PMID: 30772301 | SOX2 |
| TMPRSS7      | SOX2 regulated genes in Wounding from PMID: 30772301 | SOX2 |
| TTLL10       | SOX2 regulated genes in Wounding from PMID: 30772301 | SOX2 |
| TRIB1        | SOX2 regulated genes in Wounding from PMID: 30772301 | SOX2 |
| SCNN1G       | SOX2 regulated genes in Wounding from PMID: 30772301 | SOX2 |
| CHMP3        | SOX2 regulated genes in Wounding from PMID: 30772301 | SOX2 |
| RNF103-CHMP3 | SOX2 regulated genes in Wounding from PMID: 30772301 | SOX2 |
| BPGM         | SOX2 regulated genes in Wounding from PMID: 30772301 | SOX2 |
| PRRC2B       | SOX2 regulated genes in Wounding from PMID: 30772301 | SOX2 |
| ALDH3A2      | SOX2 regulated genes in Wounding from PMID: 30772301 | SOX2 |
| SLC25A13     | SOX2 regulated genes in Wounding from PMID: 30772301 | SOX2 |
| BCL7A        | SOX2 regulated genes in Wounding from PMID: 30772301 | SOX2 |
| SERTAD1      | SOX2 regulated genes in Wounding from PMID: 30772301 | SOX2 |
| GNPMB        | SOX2 regulated genes in Wounding from PMID: 30772301 | SOX2 |
| SAE1         | SOX2 regulated genes in Wounding from PMID: 30772301 | SOX2 |
| DNAJC6       | SOX2 regulated genes in Wounding from PMID: 30772301 | SOX2 |
| STOX1        | SOX2 regulated genes in Wounding from PMID: 30772301 | SOX2 |
| DYNC1LI2     | SOX2 regulated genes in Wounding from PMID: 30772301 | SOX2 |
| ZMYM2        | SOX2 regulated genes in Wounding from PMID: 30772301 | SOX2 |
| RABGEF1      | SOX2 regulated genes in Wounding from PMID: 30772301 | SOX2 |
| STBD1        | SOX2 regulated genes in Wounding from PMID: 30772301 | SOX2 |
| INTS6        | SOX2 regulated genes in Wounding from PMID: 30772301 | SOX2 |
| AP1AR        | SOX2 regulated genes in Wounding from PMID: 30772301 | SOX2 |
| DDX51        | SOX2 regulated genes in Wounding from PMID: 30772301 | SOX2 |
| PI4K2B       | SOX2 regulated genes in Wounding from PMID: 30772301 | SOX2 |
| PUF60        | SOX2 regulated genes in Wounding from PMID: 30772301 | SOX2 |
| SCT          | SOX2 regulated genes in Wounding from PMID: 30772301 | SOX2 |
| ANAPC2       | SOX2 regulated genes in Wounding from PMID: 30772301 | SOX2 |
| CYP4F12      | SOX2 regulated genes in Wounding from PMID: 30772301 | SOX2 |
| CDCP1        | SOX2 regulated genes in Wounding from PMID: 30772301 | SOX2 |

|          |                                                      |      |
|----------|------------------------------------------------------|------|
| TJP2     | SOX2 regulated genes in Wounding from PMID: 30772301 | SOX2 |
| VCP      | SOX2 regulated genes in Wounding from PMID: 30772301 | SOX2 |
| PDZRN3   | SOX2 regulated genes in Wounding from PMID: 30772301 | SOX2 |
| SRC      | SOX2 regulated genes in Wounding from PMID: 30772301 | SOX2 |
| CA6      | SOX2 regulated genes in Wounding from PMID: 30772301 | SOX2 |
| LMNB1    | SOX2 regulated genes in Wounding from PMID: 30772301 | SOX2 |
| SH3YL1   | SOX2 regulated genes in Wounding from PMID: 30772301 | SOX2 |
| JMY      | SOX2 regulated genes in Wounding from PMID: 30772301 | SOX2 |
| NUMB     | SOX2 regulated genes in Wounding from PMID: 30772301 | SOX2 |
| TOB1     | SOX2 regulated genes in Wounding from PMID: 30772301 | SOX2 |
| GIPC2    | SOX2 regulated genes in Wounding from PMID: 30772301 | SOX2 |
| FOXK2    | SOX2 regulated genes in Wounding from PMID: 30772301 | SOX2 |
| IMP4     | SOX2 regulated genes in Wounding from PMID: 30772301 | SOX2 |
| KATNBL1  | SOX2 regulated genes in Wounding from PMID: 30772301 | SOX2 |
| HSPA14   | SOX2 regulated genes in Wounding from PMID: 30772301 | SOX2 |
| NFE2L3   | SOX2 regulated genes in Wounding from PMID: 30772301 | SOX2 |
| YWHAZ    | SOX2 regulated genes in Wounding from PMID: 30772301 | SOX2 |
| PTPRF    | SOX2 regulated genes in Wounding from PMID: 30772301 | SOX2 |
| SLC38A5  | SOX2 regulated genes in Wounding from PMID: 30772301 | SOX2 |
| ACP7     | SOX2 regulated genes in Wounding from PMID: 30772301 | SOX2 |
| KCTD4    | SOX2 regulated genes in Wounding from PMID: 30772301 | SOX2 |
| HEPH     | SOX2 regulated genes in Wounding from PMID: 30772301 | SOX2 |
| ETF1     | SOX2 regulated genes in Wounding from PMID: 30772301 | SOX2 |
| FLRT2    | SOX2 regulated genes in Wounding from PMID: 30772301 | SOX2 |
| GCNT4    | SOX2 regulated genes in Wounding from PMID: 30772301 | SOX2 |
| NRBP2    | SOX2 regulated genes in Wounding from PMID: 30772301 | SOX2 |
| PNLDC1   | SOX2 regulated genes in Wounding from PMID: 30772301 | SOX2 |
| WHRN     | SOX2 regulated genes in Wounding from PMID: 30772301 | SOX2 |
| TMEM64   | SOX2 regulated genes in Wounding from PMID: 30772301 | SOX2 |
| TRO      | SOX2 regulated genes in Wounding from PMID: 30772301 | SOX2 |
| PPARD    | SOX2 regulated genes in Wounding from PMID: 30772301 | SOX2 |
| SH3D19   | SOX2 regulated genes in Wounding from PMID: 30772301 | SOX2 |
| SRSF12   | SOX2 regulated genes in Wounding from PMID: 30772301 | SOX2 |
| AGAP3    | SOX2 regulated genes in Wounding from PMID: 30772301 | SOX2 |
| C5orf46  | SOX2 regulated genes in Wounding from PMID: 30772301 | SOX2 |
| SYT17    | SOX2 regulated genes in Wounding from PMID: 30772301 | SOX2 |
| PLAUR    | SOX2 regulated genes in Wounding from PMID: 30772301 | SOX2 |
| SNN      | SOX2 regulated genes in Wounding from PMID: 30772301 | SOX2 |
| UBAP2    | SOX2 regulated genes in Wounding from PMID: 30772301 | SOX2 |
| MFSD13A  | SOX2 regulated genes in Wounding from PMID: 30772301 | SOX2 |
| EPB41L4A | SOX2 regulated genes in Wounding from PMID: 30772301 | SOX2 |
| PREP     | SOX2 regulated genes in Wounding from PMID: 30772301 | SOX2 |
| TSSK1B   | SOX2 regulated genes in Wounding from PMID: 30772301 | SOX2 |
| ATP6V0A4 | SOX2 regulated genes in Wounding from PMID: 30772301 | SOX2 |
| LXN      | SOX2 regulated genes in Wounding from PMID: 30772301 | SOX2 |
| DUSP6    | SOX2 regulated genes in Wounding from PMID: 30772301 | SOX2 |
| SATB2    | SOX2 regulated genes in Wounding from PMID: 30772301 | SOX2 |
| GORASP2  | SOX2 regulated genes in Wounding from PMID: 30772301 | SOX2 |
| KDM5C    | SOX2 regulated genes in Wounding from PMID: 30772301 | SOX2 |
| DGKZ     | SOX2 regulated genes in Wounding from PMID: 30772301 | SOX2 |
| OTUB2    | SOX2 regulated genes in Wounding from PMID: 30772301 | SOX2 |
| EEA1     | SOX2 regulated genes in Wounding from PMID: 30772301 | SOX2 |
| VSIG10   | SOX2 regulated genes in Wounding from PMID: 30772301 | SOX2 |
| ALDH1A3  | SOX2 regulated genes in Wounding from PMID: 30772301 | SOX2 |
| USP32    | SOX2 regulated genes in Wounding from PMID: 30772301 | SOX2 |
| ANKLE1   | SOX2 regulated genes in Wounding from PMID: 30772301 | SOX2 |
| AKIRIN2  | SOX2 regulated genes in Wounding from PMID: 30772301 | SOX2 |
| SAMD5    | SOX2 regulated genes in Wounding from PMID: 30772301 | SOX2 |
| DYNLT1   | SOX2 regulated genes in Wounding from PMID: 30772301 | SOX2 |

|           |                                                      |      |
|-----------|------------------------------------------------------|------|
| PTK2      | SOX2 regulated genes in Wounding from PMID: 30772301 | SOX2 |
| CROT      | SOX2 regulated genes in Wounding from PMID: 30772301 | SOX2 |
| XBP1      | SOX2 regulated genes in Wounding from PMID: 30772301 | SOX2 |
| PTK2B     | SOX2 regulated genes in Wounding from PMID: 30772301 | SOX2 |
| TCF7L1    | SOX2 regulated genes in Wounding from PMID: 30772301 | SOX2 |
| CBX1      | SOX2 regulated genes in Wounding from PMID: 30772301 | SOX2 |
| GABRP     | SOX2 regulated genes in Wounding from PMID: 30772301 | SOX2 |
| FZD2      | SOX2 regulated genes in Wounding from PMID: 30772301 | SOX2 |
| BAIAP2L1  | SOX2 regulated genes in Wounding from PMID: 30772301 | SOX2 |
| PINLYP    | SOX2 regulated genes in Wounding from PMID: 30772301 | SOX2 |
| STIP1     | SOX2 regulated genes in Wounding from PMID: 30772301 | SOX2 |
| CLDND1    | SOX2 regulated genes in Wounding from PMID: 30772301 | SOX2 |
| C1QTNF12  | SOX2 regulated genes in Wounding from PMID: 30772301 | SOX2 |
| DYNLL1    | SOX2 regulated genes in Wounding from PMID: 30772301 | SOX2 |
| SLCO4C1   | SOX2 regulated genes in Wounding from PMID: 30772301 | SOX2 |
| GJB2      | SOX2 regulated genes in Wounding from PMID: 30772301 | SOX2 |
| CCL27     | SOX2 regulated genes in Wounding from PMID: 30772301 | SOX2 |
| GABARAPL2 | SOX2 regulated genes in Wounding from PMID: 30772301 | SOX2 |
| CDC42BPG  | SOX2 regulated genes in Wounding from PMID: 30772301 | SOX2 |
| GLB1L2    | SOX2 regulated genes in Wounding from PMID: 30772301 | SOX2 |
| SLC35A2   | SOX2 regulated genes in Wounding from PMID: 30772301 | SOX2 |
| JPH4      | SOX2 regulated genes in Wounding from PMID: 30772301 | SOX2 |
| STRN      | SOX2 regulated genes in Wounding from PMID: 30772301 | SOX2 |
| RET       | SOX2 regulated genes in Wounding from PMID: 30772301 | SOX2 |
| GPR37     | SOX2 regulated genes in Wounding from PMID: 30772301 | SOX2 |
| BOK       | SOX2 regulated genes in Wounding from PMID: 30772301 | SOX2 |
| CTSF      | SOX2 regulated genes in Wounding from PMID: 30772301 | SOX2 |
| RTKN2     | SOX2 regulated genes in Wounding from PMID: 30772301 | SOX2 |
| PEBP1     | SOX2 regulated genes in Wounding from PMID: 30772301 | SOX2 |
| C3orf18   | SOX2 regulated genes in Wounding from PMID: 30772301 | SOX2 |
| GAN       | SOX2 regulated genes in Wounding from PMID: 30772301 | SOX2 |
| EIF4A3    | SOX2 regulated genes in Wounding from PMID: 30772301 | SOX2 |
| SOWAHB    | SOX2 regulated genes in Wounding from PMID: 30772301 | SOX2 |
| SUN2      | SOX2 regulated genes in Wounding from PMID: 30772301 | SOX2 |
| GPC1      | SOX2 regulated genes in Wounding from PMID: 30772301 | SOX2 |
| TDRD9     | SOX2 regulated genes in Wounding from PMID: 30772301 | SOX2 |
| BCO1      | SOX2 regulated genes in Wounding from PMID: 30772301 | SOX2 |
| EML4      | SOX2 regulated genes in Wounding from PMID: 30772301 | SOX2 |
| THAP1     | SOX2 regulated genes in Wounding from PMID: 30772301 | SOX2 |
| RGS9      | SOX2 regulated genes in Wounding from PMID: 30772301 | SOX2 |
| TTLL7     | SOX2 regulated genes in Wounding from PMID: 30772301 | SOX2 |
| IGF1R     | SOX2 regulated genes in Wounding from PMID: 30772301 | SOX2 |
| EPGN      | SOX2 regulated genes in Wounding from PMID: 30772301 | SOX2 |
| VASN      | SOX2 regulated genes in Wounding from PMID: 30772301 | SOX2 |
| CRISP3    | SOX2 regulated genes in Wounding from PMID: 30772301 | SOX2 |
| EIF1AX    | SOX2 regulated genes in Wounding from PMID: 30772301 | SOX2 |
| HSPA2     | SOX2 regulated genes in Wounding from PMID: 30772301 | SOX2 |
| BTG1      | SOX2 regulated genes in Wounding from PMID: 30772301 | SOX2 |
| KIAA1191  | SOX2 regulated genes in Wounding from PMID: 30772301 | SOX2 |
| TPM1      | SOX2 regulated genes in Wounding from PMID: 30772301 | SOX2 |
| UNC45A    | SOX2 regulated genes in Wounding from PMID: 30772301 | SOX2 |
| EIF4G2    | SOX2 regulated genes in Wounding from PMID: 30772301 | SOX2 |
| PPP1R36   | SOX2 regulated genes in Wounding from PMID: 30772301 | SOX2 |
| DUSP2     | SOX2 regulated genes in Wounding from PMID: 30772301 | SOX2 |
| C11orf52  | SOX2 regulated genes in Wounding from PMID: 30772301 | SOX2 |
| TMEM62    | SOX2 regulated genes in Wounding from PMID: 30772301 | SOX2 |
| CXCL14    | SOX2 regulated genes in Wounding from PMID: 30772301 | SOX2 |
| CAMTA1    | SOX2 regulated genes in Wounding from PMID: 30772301 | SOX2 |
| SERTAD2   | SOX2 regulated genes in Wounding from PMID: 30772301 | SOX2 |



|          |                                                      |      |
|----------|------------------------------------------------------|------|
| PLS3     | SOX2 regulated genes in Wounding from PMID: 30772301 | SOX2 |
| SIAH2    | SOX2 regulated genes in Wounding from PMID: 30772301 | SOX2 |
| NOL10    | SOX2 regulated genes in Wounding from PMID: 30772301 | SOX2 |
| ZNF827   | SOX2 regulated genes in Wounding from PMID: 30772301 | SOX2 |
| ITGB6    | SOX2 regulated genes in Wounding from PMID: 30772301 | SOX2 |
| EIF1AD   | SOX2 regulated genes in Wounding from PMID: 30772301 | SOX2 |
| PCYOX1   | SOX2 regulated genes in Wounding from PMID: 30772301 | SOX2 |
| IGF2BP1  | SOX2 regulated genes in Wounding from PMID: 30772301 | SOX2 |
| FADS3    | SOX2 regulated genes in Wounding from PMID: 30772301 | SOX2 |
| SMARCC1  | SOX2 regulated genes in Wounding from PMID: 30772301 | SOX2 |
| MT4      | SOX2 regulated genes in Wounding from PMID: 30772301 | SOX2 |
| ATXN2    | SOX2 regulated genes in Wounding from PMID: 30772301 | SOX2 |
| FAM47E   | SOX2 regulated genes in Wounding from PMID: 30772301 | SOX2 |
| STK39    | SOX2 regulated genes in Wounding from PMID: 30772301 | SOX2 |
| ANO9     | SOX2 regulated genes in Wounding from PMID: 30772301 | SOX2 |
| POLH     | SOX2 regulated genes in Wounding from PMID: 30772301 | SOX2 |
| TNFAIP1  | SOX2 regulated genes in Wounding from PMID: 30772301 | SOX2 |
| FAM107B  | SOX2 regulated genes in Wounding from PMID: 30772301 | SOX2 |
| DENR     | SOX2 regulated genes in Wounding from PMID: 30772301 | SOX2 |
| PPP2R5B  | SOX2 regulated genes in Wounding from PMID: 30772301 | SOX2 |
| CCNO     | SOX2 regulated genes in Wounding from PMID: 30772301 | SOX2 |
| HSD17B14 | SOX2 regulated genes in Wounding from PMID: 30772301 | SOX2 |
| LY6D     | SOX2 regulated genes in Wounding from PMID: 30772301 | SOX2 |
| CSRNP1   | SOX2 regulated genes in Wounding from PMID: 30772301 | SOX2 |
| DLX2     | SOX2 regulated genes in Wounding from PMID: 30772301 | SOX2 |
| CA2      | SOX2 regulated genes in Wounding from PMID: 30772301 | SOX2 |
| SLC35F6  | SOX2 regulated genes in Wounding from PMID: 30772301 | SOX2 |
| CARM1    | SOX2 regulated genes in Wounding from PMID: 30772301 | SOX2 |
| PSMD12   | SOX2 regulated genes in Wounding from PMID: 30772301 | SOX2 |
| EDF1     | SOX2 regulated genes in Wounding from PMID: 30772301 | SOX2 |
| PLCXD2   | SOX2 regulated genes in Wounding from PMID: 30772301 | SOX2 |
| DDX19A   | SOX2 regulated genes in Wounding from PMID: 30772301 | SOX2 |
| PURB     | SOX2 regulated genes in Wounding from PMID: 30772301 | SOX2 |
| SEC23IP  | SOX2 regulated genes in Wounding from PMID: 30772301 | SOX2 |
| HIF1A    | SOX2 regulated genes in Wounding from PMID: 30772301 | SOX2 |
| UBA2     | SOX2 regulated genes in Wounding from PMID: 30772301 | SOX2 |
| ALG9     | SOX2 regulated genes in Wounding from PMID: 30772301 | SOX2 |
| FBP1     | SOX2 regulated genes in Wounding from PMID: 30772301 | SOX2 |
| N4BP3    | SOX2 regulated genes in Wounding from PMID: 30772301 | SOX2 |
| CSNK1G3  | SOX2 regulated genes in Wounding from PMID: 30772301 | SOX2 |
| PLEKHG3  | SOX2 regulated genes in Wounding from PMID: 30772301 | SOX2 |
| PPP2R1A  | SOX2 regulated genes in Wounding from PMID: 30772301 | SOX2 |
| BOP1     | SOX2 regulated genes in Wounding from PMID: 30772301 | SOX2 |
| ZNF185   | SOX2 regulated genes in Wounding from PMID: 30772301 | SOX2 |
| ZBTB1    | SOX2 regulated genes in Wounding from PMID: 30772301 | SOX2 |
| OPLAH    | SOX2 regulated genes in Wounding from PMID: 30772301 | SOX2 |
| KRT80    | SOX2 regulated genes in Wounding from PMID: 30772301 | SOX2 |
| TRPM4    | SOX2 regulated genes in Wounding from PMID: 30772301 | SOX2 |
| MAP3K20  | SOX2 regulated genes in Wounding from PMID: 30772301 | SOX2 |
| OSGIN1   | SOX2 regulated genes in Wounding from PMID: 30772301 | SOX2 |
| GPC3     | SOX2 regulated genes in Wounding from PMID: 30772301 | SOX2 |
| POLR2J3  | SOX2 regulated genes in Wounding from PMID: 30772301 | SOX2 |
| UPK3BL1  | SOX2 regulated genes in Wounding from PMID: 30772301 | SOX2 |
| UPK3BL2  | SOX2 regulated genes in Wounding from PMID: 30772301 | SOX2 |
| PLCH2    | SOX2 regulated genes in Wounding from PMID: 30772301 | SOX2 |
| CNIH2    | SOX2 regulated genes in Wounding from PMID: 30772301 | SOX2 |
| CRYM     | SOX2 regulated genes in Wounding from PMID: 30772301 | SOX2 |
| EPS8L1   | SOX2 regulated genes in Wounding from PMID: 30772301 | SOX2 |
| LCN12    | SOX2 regulated genes in Wounding from PMID: 30772301 | SOX2 |

|          |                                                      |      |
|----------|------------------------------------------------------|------|
| GTF2H2   | SOX2 regulated genes in Wounding from PMID: 30772301 | SOX2 |
| SLC20A2  | SOX2 regulated genes in Wounding from PMID: 30772301 | SOX2 |
| SCAPER   | SOX2 regulated genes in Wounding from PMID: 30772301 | SOX2 |
| SLC38A3  | SOX2 regulated genes in Wounding from PMID: 30772301 | SOX2 |
| SH2D4A   | SOX2 regulated genes in Wounding from PMID: 30772301 | SOX2 |
| NAE1     | SOX2 regulated genes in Wounding from PMID: 30772301 | SOX2 |
| MYCL     | SOX2 regulated genes in Wounding from PMID: 30772301 | SOX2 |
| YWHAQ    | SOX2 regulated genes in Wounding from PMID: 30772301 | SOX2 |
| NEK5     | SOX2 regulated genes in Wounding from PMID: 30772301 | SOX2 |
| PTPRN2   | SOX2 regulated genes in Wounding from PMID: 30772301 | SOX2 |
| TAGLN3   | SOX2 regulated genes in Wounding from PMID: 30772301 | SOX2 |
| METAP1   | SOX2 regulated genes in Wounding from PMID: 30772301 | SOX2 |
| PLEKHG1  | SOX2 regulated genes in Wounding from PMID: 30772301 | SOX2 |
| POLD4    | SOX2 regulated genes in Wounding from PMID: 30772301 | SOX2 |
| CLDN3    | SOX2 regulated genes in Wounding from PMID: 30772301 | SOX2 |
| SRRT     | SOX2 regulated genes in Wounding from PMID: 30772301 | SOX2 |
| UNC93A   | SOX2 regulated genes in Wounding from PMID: 30772301 | SOX2 |
| EIF4E    | SOX2 regulated genes in Wounding from PMID: 30772301 | SOX2 |
| PXYLP1   | SOX2 regulated genes in Wounding from PMID: 30772301 | SOX2 |
| EPCAM    | SOX2 regulated genes in Wounding from PMID: 30772301 | SOX2 |
| WRNIP1   | SOX2 regulated genes in Wounding from PMID: 30772301 | SOX2 |
| LATS1    | SOX2 regulated genes in Wounding from PMID: 30772301 | SOX2 |
| PAPSS2   | SOX2 regulated genes in Wounding from PMID: 30772301 | SOX2 |
| ANKH     | SOX2 regulated genes in Wounding from PMID: 30772301 | SOX2 |
| PPP1CB   | SOX2 regulated genes in Wounding from PMID: 30772301 | SOX2 |
| C4orf36  | SOX2 regulated genes in Wounding from PMID: 30772301 | SOX2 |
| CLASRP   | SOX2 regulated genes in Wounding from PMID: 30772301 | SOX2 |
| DHX16    | SOX2 regulated genes in Wounding from PMID: 30772301 | SOX2 |
| PSCA     | SOX2 regulated genes in Wounding from PMID: 30772301 | SOX2 |
| NECAB1   | SOX2 regulated genes in Wounding from PMID: 30772301 | SOX2 |
| CKAP4    | SOX2 regulated genes in Wounding from PMID: 30772301 | SOX2 |
| BNC2     | SOX2 regulated genes in Wounding from PMID: 30772301 | SOX2 |
| PDZD2    | SOX2 regulated genes in Wounding from PMID: 30772301 | SOX2 |
| ENOX1    | SOX2 regulated genes in Wounding from PMID: 30772301 | SOX2 |
| PRKCI    | SOX2 regulated genes in Wounding from PMID: 30772301 | SOX2 |
| XRCC1    | SOX2 regulated genes in Wounding from PMID: 30772301 | SOX2 |
| MPRIP    | SOX2 regulated genes in Wounding from PMID: 30772301 | SOX2 |
| BMPR1B   | SOX2 regulated genes in Wounding from PMID: 30772301 | SOX2 |
| CCK      | SOX2 regulated genes in Wounding from PMID: 30772301 | SOX2 |
| LHX2     | SOX2 regulated genes in Wounding from PMID: 30772301 | SOX2 |
| SP6      | SOX2 regulated genes in Wounding from PMID: 30772301 | SOX2 |
| MFSD6    | SOX2 regulated genes in Wounding from PMID: 30772301 | SOX2 |
| TOM1L1   | SOX2 regulated genes in Wounding from PMID: 30772301 | SOX2 |
| FAM83H   | SOX2 regulated genes in Wounding from PMID: 30772301 | SOX2 |
| AFF4     | SOX2 regulated genes in Wounding from PMID: 30772301 | SOX2 |
| PIP4K2C  | SOX2 regulated genes in Wounding from PMID: 30772301 | SOX2 |
| RNF144B  | SOX2 regulated genes in Wounding from PMID: 30772301 | SOX2 |
| RBM15B   | SOX2 regulated genes in Wounding from PMID: 30772301 | SOX2 |
| LGALS12  | SOX2 regulated genes in Wounding from PMID: 30772301 | SOX2 |
| ATP6V1G1 | SOX2 regulated genes in Wounding from PMID: 30772301 | SOX2 |
| SCARB2   | SOX2 regulated genes in Wounding from PMID: 30772301 | SOX2 |
| INTS8    | SOX2 regulated genes in Wounding from PMID: 30772301 | SOX2 |
| MTFR1    | SOX2 regulated genes in Wounding from PMID: 30772301 | SOX2 |
| AHI1     | SOX2 regulated genes in Wounding from PMID: 30772301 | SOX2 |
| PGAP2    | SOX2 regulated genes in Wounding from PMID: 30772301 | SOX2 |
| PHRF1    | SOX2 regulated genes in Wounding from PMID: 30772301 | SOX2 |
| MYC      | SOX2 regulated genes in Wounding from PMID: 30772301 | SOX2 |
| PPRC1    | SOX2 regulated genes in Wounding from PMID: 30772301 | SOX2 |
| SIGMAR1  | SOX2 regulated genes in Wounding from PMID: 30772301 | SOX2 |

|          |                                                      |      |
|----------|------------------------------------------------------|------|
| CLIC4    | SOX2 regulated genes in Wounding from PMID: 30772301 | SOX2 |
| ARNTL    | SOX2 regulated genes in Wounding from PMID: 30772301 | SOX2 |
| CADM4    | SOX2 regulated genes in Wounding from PMID: 30772301 | SOX2 |
| GARNL3   | SOX2 regulated genes in Wounding from PMID: 30772301 | SOX2 |
| SPINK5   | SOX2 regulated genes in Wounding from PMID: 30772301 | SOX2 |
| PPP1R10  | SOX2 regulated genes in Wounding from PMID: 30772301 | SOX2 |
| FFAR3    | SOX2 regulated genes in Wounding from PMID: 30772301 | SOX2 |
| SEC16A   | SOX2 regulated genes in Wounding from PMID: 30772301 | SOX2 |
| BCAR1    | SOX2 regulated genes in Wounding from PMID: 30772301 | SOX2 |
| SC5D     | SOX2 regulated genes in Wounding from PMID: 30772301 | SOX2 |
| HOMER2   | SOX2 regulated genes in Wounding from PMID: 30772301 | SOX2 |
| MTHFSD   | SOX2 regulated genes in Wounding from PMID: 30772301 | SOX2 |
| RIPK2    | SOX2 regulated genes in Wounding from PMID: 30772301 | SOX2 |
| RPL27    | SOX2 regulated genes in Wounding from PMID: 30772301 | SOX2 |
| MACC1    | SOX2 regulated genes in Wounding from PMID: 30772301 | SOX2 |
| PAK4     | SOX2 regulated genes in Wounding from PMID: 30772301 | SOX2 |
| FMNL2    | SOX2 regulated genes in Wounding from PMID: 30772301 | SOX2 |
| LTV1     | SOX2 regulated genes in Wounding from PMID: 30772301 | SOX2 |
| FBXO42   | SOX2 regulated genes in Wounding from PMID: 30772301 | SOX2 |
| PRKCA    | SOX2 regulated genes in Wounding from PMID: 30772301 | SOX2 |
| CMAS     | SOX2 regulated genes in Wounding from PMID: 30772301 | SOX2 |
| CTNNA1   | SOX2 regulated genes in Wounding from PMID: 30772301 | SOX2 |
| KLHL32   | SOX2 regulated genes in Wounding from PMID: 30772301 | SOX2 |
| SNTB1    | SOX2 regulated genes in Wounding from PMID: 30772301 | SOX2 |
| ANKRD27  | SOX2 regulated genes in Wounding from PMID: 30772301 | SOX2 |
| PHACTR4  | SOX2 regulated genes in Wounding from PMID: 30772301 | SOX2 |
| SORCS2   | SOX2 regulated genes in Wounding from PMID: 30772301 | SOX2 |
| SLC9A2   | SOX2 regulated genes in Wounding from PMID: 30772301 | SOX2 |
| AIG1     | SOX2 regulated genes in Wounding from PMID: 30772301 | SOX2 |
| CALD1    | SOX2 regulated genes in Wounding from PMID: 30772301 | SOX2 |
| LRP8     | SOX2 regulated genes in Wounding from PMID: 30772301 | SOX2 |
| PEX26    | SOX2 regulated genes in Wounding from PMID: 30772301 | SOX2 |
| MICAL1   | SOX2 regulated genes in Wounding from PMID: 30772301 | SOX2 |
| HSPB1    | SOX2 regulated genes in Wounding from PMID: 30772301 | SOX2 |
| AQP9     | SOX2 regulated genes in Wounding from PMID: 30772301 | SOX2 |
| ZNF428   | SOX2 regulated genes in Wounding from PMID: 30772301 | SOX2 |
| DUSP8    | SOX2 regulated genes in Wounding from PMID: 30772301 | SOX2 |
| UBLCP1   | SOX2 regulated genes in Wounding from PMID: 30772301 | SOX2 |
| PERP     | SOX2 regulated genes in Wounding from PMID: 30772301 | SOX2 |
| CCT2     | SOX2 regulated genes in Wounding from PMID: 30772301 | SOX2 |
| ATAD2B   | SOX2 regulated genes in Wounding from PMID: 30772301 | SOX2 |
| NCK2     | SOX2 regulated genes in Wounding from PMID: 30772301 | SOX2 |
| PLB1     | SOX2 regulated genes in Wounding from PMID: 30772301 | SOX2 |
| DACT2    | SOX2 regulated genes in Wounding from PMID: 30772301 | SOX2 |
| PPP2CA   | SOX2 regulated genes in Wounding from PMID: 30772301 | SOX2 |
| KRT73    | SOX2 regulated genes in Wounding from PMID: 30772301 | SOX2 |
| RAB5A    | SOX2 regulated genes in Wounding from PMID: 30772301 | SOX2 |
| CD82     | SOX2 regulated genes in Wounding from PMID: 30772301 | SOX2 |
| ITPKC    | SOX2 regulated genes in Wounding from PMID: 30772301 | SOX2 |
| NUP62    | SOX2 regulated genes in Wounding from PMID: 30772301 | SOX2 |
| GJA3     | SOX2 regulated genes in Wounding from PMID: 30772301 | SOX2 |
| FBXO30   | SOX2 regulated genes in Wounding from PMID: 30772301 | SOX2 |
| RNF6     | SOX2 regulated genes in Wounding from PMID: 30772301 | SOX2 |
| ARHGEF19 | SOX2 regulated genes in Wounding from PMID: 30772301 | SOX2 |
| TSPAN8   | SOX2 regulated genes in Wounding from PMID: 30772301 | SOX2 |
| DLX3     | SOX2 regulated genes in Wounding from PMID: 30772301 | SOX2 |
| KRT75    | SOX2 regulated genes in Wounding from PMID: 30772301 | SOX2 |
| MAP3K9   | SOX2 regulated genes in Wounding from PMID: 30772301 | SOX2 |
| NECTIN1  | SOX2 regulated genes in Wounding from PMID: 30772301 | SOX2 |

|          |                                                      |      |
|----------|------------------------------------------------------|------|
| SUDS3    | SOX2 regulated genes in Wounding from PMID: 30772301 | SOX2 |
| MSI1     | SOX2 regulated genes in Wounding from PMID: 30772301 | SOX2 |
| SARNP    | SOX2 regulated genes in Wounding from PMID: 30772301 | SOX2 |
| ASH2L    | SOX2 regulated genes in Wounding from PMID: 30772301 | SOX2 |
| EPB41L4B | SOX2 regulated genes in Wounding from PMID: 30772301 | SOX2 |
| ERCC1    | SOX2 regulated genes in Wounding from PMID: 30772301 | SOX2 |
| IER3     | SOX2 regulated genes in Wounding from PMID: 30772301 | SOX2 |
| TFAP2A   | SOX2 regulated genes in Wounding from PMID: 30772301 | SOX2 |
| PRSS53   | SOX2 regulated genes in Wounding from PMID: 30772301 | SOX2 |
| CDH6     | SOX2 regulated genes in Wounding from PMID: 30772301 | SOX2 |
| CAV2     | SOX2 regulated genes in Wounding from PMID: 30772301 | SOX2 |
| BCAS1    | SOX2 regulated genes in Wounding from PMID: 30772301 | SOX2 |
| BDKRB2   | SOX2 regulated genes in Wounding from PMID: 30772301 | SOX2 |
| MYCBP    | SOX2 regulated genes in Wounding from PMID: 30772301 | SOX2 |
| STOX2    | SOX2 regulated genes in Wounding from PMID: 30772301 | SOX2 |
| NUP107   | SOX2 regulated genes in Wounding from PMID: 30772301 | SOX2 |
| RAI14    | SOX2 regulated genes in Wounding from PMID: 30772301 | SOX2 |
| TMEM74   | SOX2 regulated genes in Wounding from PMID: 30772301 | SOX2 |
| NOXA1    | SOX2 regulated genes in Wounding from PMID: 30772301 | SOX2 |
| TMEM115  | SOX2 regulated genes in Wounding from PMID: 30772301 | SOX2 |
| UBA3     | SOX2 regulated genes in Wounding from PMID: 30772301 | SOX2 |
| INHBB    | SOX2 regulated genes in Wounding from PMID: 30772301 | SOX2 |
| EPHA2    | SOX2 regulated genes in Wounding from PMID: 30772301 | SOX2 |
| CPT1A    | SOX2 regulated genes in Wounding from PMID: 30772301 | SOX2 |
| UBXN2A   | SOX2 regulated genes in Wounding from PMID: 30772301 | SOX2 |
| MICALL1  | SOX2 regulated genes in Wounding from PMID: 30772301 | SOX2 |
| CPM      | SOX2 regulated genes in Wounding from PMID: 30772301 | SOX2 |
| STEAP1B  | SOX2 regulated genes in Wounding from PMID: 30772301 | SOX2 |
| BAG3     | SOX2 regulated genes in Wounding from PMID: 30772301 | SOX2 |
| DCAF12   | SOX2 regulated genes in Wounding from PMID: 30772301 | SOX2 |
| CTNNBIP1 | SOX2 regulated genes in Wounding from PMID: 30772301 | SOX2 |
| KDM8     | SOX2 regulated genes in Wounding from PMID: 30772301 | SOX2 |
| MANF     | SOX2 regulated genes in Wounding from PMID: 30772301 | SOX2 |
| PITPNB   | SOX2 regulated genes in Wounding from PMID: 30772301 | SOX2 |
| APOL3    | SOX2 regulated genes in Wounding from PMID: 30772301 | SOX2 |
| APOL4    | SOX2 regulated genes in Wounding from PMID: 30772301 | SOX2 |
| APOL2    | SOX2 regulated genes in Wounding from PMID: 30772301 | SOX2 |
| APOL1    | SOX2 regulated genes in Wounding from PMID: 30772301 | SOX2 |
| RCOR2    | SOX2 regulated genes in Wounding from PMID: 30772301 | SOX2 |
| ARPP19   | SOX2 regulated genes in Wounding from PMID: 30772301 | SOX2 |
| ECHDC2   | SOX2 regulated genes in Wounding from PMID: 30772301 | SOX2 |
| HAPLN4   | SOX2 regulated genes in Wounding from PMID: 30772301 | SOX2 |
| PPIF     | SOX2 regulated genes in Wounding from PMID: 30772301 | SOX2 |
| SRBD1    | SOX2 regulated genes in Wounding from PMID: 30772301 | SOX2 |
| LRRC42   | SOX2 regulated genes in Wounding from PMID: 30772301 | SOX2 |
| ESM1     | SOX2 regulated genes in Wounding from PMID: 30772301 | SOX2 |
| PITRM1   | SOX2 regulated genes in Wounding from PMID: 30772301 | SOX2 |
| METAP1D  | SOX2 regulated genes in Wounding from PMID: 30772301 | SOX2 |
| MAP2K3   | SOX2 regulated genes in Wounding from PMID: 30772301 | SOX2 |
| RFXANK   | SOX2 regulated genes in Wounding from PMID: 30772301 | SOX2 |
| TP53     | SOX2 regulated genes in Wounding from PMID: 30772301 | SOX2 |
| NR2C2AP  | SOX2 regulated genes in Wounding from PMID: 30772301 | SOX2 |
| AGAP1    | SOX2 regulated genes in Wounding from PMID: 30772301 | SOX2 |
| SNAI3    | SOX2 regulated genes in Wounding from PMID: 30772301 | SOX2 |
| NCBP2L   | SOX2 regulated genes in Wounding from PMID: 30772301 | SOX2 |
| SYCE1L   | SOX2 regulated genes in Wounding from PMID: 30772301 | SOX2 |
| TENM2    | SOX2 regulated genes in Wounding from PMID: 30772301 | SOX2 |
| DYNC1LI1 | SOX2 regulated genes in Wounding from PMID: 30772301 | SOX2 |
| HOXC13   | SOX2 regulated genes in Wounding from PMID: 30772301 | SOX2 |

|           |                                                      |      |
|-----------|------------------------------------------------------|------|
| LEF1      | SOX2 regulated genes in Wounding from PMID: 30772301 | SOX2 |
| STAM2     | SOX2 regulated genes in Wounding from PMID: 30772301 | SOX2 |
| EPB41L5   | SOX2 regulated genes in Wounding from PMID: 30772301 | SOX2 |
| METTL1    | SOX2 regulated genes in Wounding from PMID: 30772301 | SOX2 |
| MYZAP     | SOX2 regulated genes in Wounding from PMID: 30772301 | SOX2 |
| LMO4      | SOX2 regulated genes in Wounding from PMID: 30772301 | SOX2 |
| MSRB3     | SOX2 regulated genes in Wounding from PMID: 30772301 | SOX2 |
| DMBT1     | SOX2 regulated genes in Wounding from PMID: 30772301 | SOX2 |
| UPK1B     | SOX2 regulated genes in Wounding from PMID: 30772301 | SOX2 |
| MYRF      | SOX2 regulated genes in Wounding from PMID: 30772301 | SOX2 |
| FASTKD5   | SOX2 regulated genes in Wounding from PMID: 30772301 | SOX2 |
| PROM2     | SOX2 regulated genes in Wounding from PMID: 30772301 | SOX2 |
| FRMPD1    | SOX2 regulated genes in Wounding from PMID: 30772301 | SOX2 |
| KANK1     | SOX2 regulated genes in Wounding from PMID: 30772301 | SOX2 |
| RHCG      | SOX2 regulated genes in Wounding from PMID: 30772301 | SOX2 |
| GRPEL2    | SOX2 regulated genes in Wounding from PMID: 30772301 | SOX2 |
| MXI1      | SOX2 regulated genes in Wounding from PMID: 30772301 | SOX2 |
| SGTB      | SOX2 regulated genes in Wounding from PMID: 30772301 | SOX2 |
| WNK4      | SOX2 regulated genes in Wounding from PMID: 30772301 | SOX2 |
| MUS81     | SOX2 regulated genes in Wounding from PMID: 30772301 | SOX2 |
| EIF3J     | SOX2 regulated genes in Wounding from PMID: 30772301 | SOX2 |
| VCL       | SOX2 regulated genes in Wounding from PMID: 30772301 | SOX2 |
| HOXB6     | SOX2 regulated genes in Wounding from PMID: 30772301 | SOX2 |
| KMT5B     | SOX2 regulated genes in Wounding from PMID: 30772301 | SOX2 |
| SRPRA     | SOX2 regulated genes in Wounding from PMID: 30772301 | SOX2 |
| RBM18     | SOX2 regulated genes in Wounding from PMID: 30772301 | SOX2 |
| HSPA5     | SOX2 regulated genes in Wounding from PMID: 30772301 | SOX2 |
| USO1      | SOX2 regulated genes in Wounding from PMID: 30772301 | SOX2 |
| PHTF2     | SOX2 regulated genes in Wounding from PMID: 30772301 | SOX2 |
| SERPINA11 | SOX2 regulated genes in Wounding from PMID: 30772301 | SOX2 |
| PDCL3     | SOX2 regulated genes in Wounding from PMID: 30772301 | SOX2 |
| PCYOX1L   | SOX2 regulated genes in Wounding from PMID: 30772301 | SOX2 |
| SLCO5A1   | SOX2 regulated genes in Wounding from PMID: 30772301 | SOX2 |
| SLC27A1   | SOX2 regulated genes in Wounding from PMID: 30772301 | SOX2 |
| AK4       | SOX2 regulated genes in Wounding from PMID: 30772301 | SOX2 |
| IL1B      | SOX2 regulated genes in Wounding from PMID: 30772301 | SOX2 |
| MPZL2     | SOX2 regulated genes in Wounding from PMID: 30772301 | SOX2 |
| MAS1      | SOX2 regulated genes in Wounding from PMID: 30772301 | SOX2 |
| TNFRSF11B | SOX2 regulated genes in Wounding from PMID: 30772301 | SOX2 |
| TECTA     | SOX2 regulated genes in Wounding from PMID: 30772301 | SOX2 |
| CAPN1     | SOX2 regulated genes in Wounding from PMID: 30772301 | SOX2 |
| CNKSR3    | SOX2 regulated genes in Wounding from PMID: 30772301 | SOX2 |
| UBE2H     | SOX2 regulated genes in Wounding from PMID: 30772301 | SOX2 |
| SIAH1     | SOX2 regulated genes in Wounding from PMID: 30772301 | SOX2 |
| TRIM2     | SOX2 regulated genes in Wounding from PMID: 30772301 | SOX2 |
| CD164L2   | SOX2 regulated genes in Wounding from PMID: 30772301 | SOX2 |
| ATP1B3    | SOX2 regulated genes in Wounding from PMID: 30772301 | SOX2 |
| SEC24C    | SOX2 regulated genes in Wounding from PMID: 30772301 | SOX2 |
| CTTN      | SOX2 regulated genes in Wounding from PMID: 30772301 | SOX2 |
| IFFO2     | SOX2 regulated genes in Wounding from PMID: 30772301 | SOX2 |
| GDPD3     | SOX2 regulated genes in Wounding from PMID: 30772301 | SOX2 |
| PRICKLE2  | SOX2 regulated genes in Wounding from PMID: 30772301 | SOX2 |
| GCSH      | SOX2 regulated genes in Wounding from PMID: 30772301 | SOX2 |
| COQ5      | SOX2 regulated genes in Wounding from PMID: 30772301 | SOX2 |
| OAF       | SOX2 regulated genes in Wounding from PMID: 30772301 | SOX2 |
| PWWP2B    | SOX2 regulated genes in Wounding from PMID: 30772301 | SOX2 |
| HADHB     | SOX2 regulated genes in Wounding from PMID: 30772301 | SOX2 |
| PLEKHH1   | SOX2 regulated genes in Wounding from PMID: 30772301 | SOX2 |
| ELL2      | SOX2 regulated genes in Wounding from PMID: 30772301 | SOX2 |

|                |                                                      |      |
|----------------|------------------------------------------------------|------|
| PSORS1C2       | SOX2 regulated genes in Wounding from PMID: 30772301 | SOX2 |
| ABHD17C        | SOX2 regulated genes in Wounding from PMID: 30772301 | SOX2 |
| ELF5           | SOX2 regulated genes in Wounding from PMID: 30772301 | SOX2 |
| TM4SF1         | SOX2 regulated genes in Wounding from PMID: 30772301 | SOX2 |
| EIF3L          | SOX2 regulated genes in Wounding from PMID: 30772301 | SOX2 |
| EIF3D          | SOX2 regulated genes in Wounding from PMID: 30772301 | SOX2 |
| C10orf95       | SOX2 regulated genes in Wounding from PMID: 30772301 | SOX2 |
| LYPD5          | SOX2 regulated genes in Wounding from PMID: 30772301 | SOX2 |
| C11orf80       | SOX2 regulated genes in Wounding from PMID: 30772301 | SOX2 |
| MAPK3          | SOX2 regulated genes in Wounding from PMID: 30772301 | SOX2 |
| PTK7           | SOX2 regulated genes in Wounding from PMID: 30772301 | SOX2 |
| INHBA          | SOX2 regulated genes in Wounding from PMID: 30772301 | SOX2 |
| SNIP1          | SOX2 regulated genes in Wounding from PMID: 30772301 | SOX2 |
| EIF5AL1        | SOX2 regulated genes in Wounding from PMID: 30772301 | SOX2 |
| RAB21          | SOX2 regulated genes in Wounding from PMID: 30772301 | SOX2 |
| ACTN1          | SOX2 regulated genes in Wounding from PMID: 30772301 | SOX2 |
| NIPAL1         | SOX2 regulated genes in Wounding from PMID: 30772301 | SOX2 |
| ICMT           | SOX2 regulated genes in Wounding from PMID: 30772301 | SOX2 |
| SARDH          | SOX2 regulated genes in Wounding from PMID: 30772301 | SOX2 |
| RDH10          | SOX2 regulated genes in Wounding from PMID: 30772301 | SOX2 |
| KIF26A         | SOX2 regulated genes in Wounding from PMID: 30772301 | SOX2 |
| RAB15          | SOX2 regulated genes in Wounding from PMID: 30772301 | SOX2 |
| LINC02210-CRHR | SOX2 regulated genes in Wounding from PMID: 30772301 | SOX2 |
| TCP1           | SOX2 regulated genes in Wounding from PMID: 30772301 | SOX2 |
| SOX9           | SOX2 regulated genes in Wounding from PMID: 30772301 | SOX2 |
| FGFR3          | SOX2 regulated genes in Wounding from PMID: 30772301 | SOX2 |
| ANXA8          | SOX2 regulated genes in Wounding from PMID: 30772301 | SOX2 |
| ANXA8L1        | SOX2 regulated genes in Wounding from PMID: 30772301 | SOX2 |
| PTPRK          | SOX2 regulated genes in Wounding from PMID: 30772301 | SOX2 |
| SEC11A         | SOX2 regulated genes in Wounding from PMID: 30772301 | SOX2 |
| PTGR1          | SOX2 regulated genes in Wounding from PMID: 30772301 | SOX2 |
| CNTFR          | SOX2 regulated genes in Wounding from PMID: 30772301 | SOX2 |
| ACTB           | SOX2 regulated genes in Wounding from PMID: 30772301 | SOX2 |
| TMEM39A        | SOX2 regulated genes in Wounding from PMID: 30772301 | SOX2 |
| SFRP1          | SOX2 regulated genes in Wounding from PMID: 30772301 | SOX2 |
| EPHB6          | SOX2 regulated genes in Wounding from PMID: 30772301 | SOX2 |
| PIGH           | SOX2 regulated genes in Wounding from PMID: 30772301 | SOX2 |
| ZFAND6         | SOX2 regulated genes in Wounding from PMID: 30772301 | SOX2 |
| NECTIN3        | SOX2 regulated genes in Wounding from PMID: 30772301 | SOX2 |
| DOK4           | SOX2 regulated genes in Wounding from PMID: 30772301 | SOX2 |
| NRARP          | SOX2 regulated genes in Wounding from PMID: 30772301 | SOX2 |
| NTN4           | SOX2 regulated genes in Wounding from PMID: 30772301 | SOX2 |
| TSFM           | SOX2 regulated genes in Wounding from PMID: 30772301 | SOX2 |
| CXXC5          | SOX2 regulated genes in Wounding from PMID: 30772301 | SOX2 |
| COPB1          | SOX2 regulated genes in Wounding from PMID: 30772301 | SOX2 |
| SCNN1B         | SOX2 regulated genes in Wounding from PMID: 30772301 | SOX2 |
| FAF2           | SOX2 regulated genes in Wounding from PMID: 30772301 | SOX2 |
| ACTR1A         | SOX2 regulated genes in Wounding from PMID: 30772301 | SOX2 |
| CLCF1          | SOX2 regulated genes in Wounding from PMID: 30772301 | SOX2 |
| CPEB2          | SOX2 regulated genes in Wounding from PMID: 30772301 | SOX2 |
| MAL            | SOX2 regulated genes in Wounding from PMID: 30772301 | SOX2 |
| RALA           | SOX2 regulated genes in Wounding from PMID: 30772301 | SOX2 |
| MOB1B          | SOX2 regulated genes in Wounding from PMID: 30772301 | SOX2 |
| UBA1           | SOX2 regulated genes in Wounding from PMID: 30772301 | SOX2 |
| EVA1A          | SOX2 regulated genes in Wounding from PMID: 30772301 | SOX2 |
| VGLL3          | SOX2 regulated genes in Wounding from PMID: 30772301 | SOX2 |
| LBH            | SOX2 regulated genes in Wounding from PMID: 30772301 | SOX2 |
| C6orf132       | SOX2 regulated genes in Wounding from PMID: 30772301 | SOX2 |
| CAND1          | SOX2 regulated genes in Wounding from PMID: 30772301 | SOX2 |

|          |                                                      |      |
|----------|------------------------------------------------------|------|
| NUP35    | SOX2 regulated genes in Wounding from PMID: 30772301 | SOX2 |
| SNRPA    | SOX2 regulated genes in Wounding from PMID: 30772301 | SOX2 |
| FOSL1    | SOX2 regulated genes in Wounding from PMID: 30772301 | SOX2 |
| PLPP5    | SOX2 regulated genes in Wounding from PMID: 30772301 | SOX2 |
| DLX4     | SOX2 regulated genes in Wounding from PMID: 30772301 | SOX2 |
| BRAP     | SOX2 regulated genes in Wounding from PMID: 30772301 | SOX2 |
| HS6ST1   | SOX2 regulated genes in Wounding from PMID: 30772301 | SOX2 |
| GPC4     | SOX2 regulated genes in Wounding from PMID: 30772301 | SOX2 |
| DPYSL5   | SOX2 regulated genes in Wounding from PMID: 30772301 | SOX2 |
| PPFIA3   | SOX2 regulated genes in Wounding from PMID: 30772301 | SOX2 |
| MMP1     | SOX2 regulated genes in Wounding from PMID: 30772301 | SOX2 |
| ATP6V1A  | SOX2 regulated genes in Wounding from PMID: 30772301 | SOX2 |
| SMNDC1   | SOX2 regulated genes in Wounding from PMID: 30772301 | SOX2 |
| TMEM121  | SOX2 regulated genes in Wounding from PMID: 30772301 | SOX2 |
| GJB4     | SOX2 regulated genes in Wounding from PMID: 30772301 | SOX2 |
| HNRNPAB  | SOX2 regulated genes in Wounding from PMID: 30772301 | SOX2 |
| BSPRY    | SOX2 regulated genes in Wounding from PMID: 30772301 | SOX2 |
| BRD1     | SOX2 regulated genes in Wounding from PMID: 30772301 | SOX2 |
| SUFU     | SOX2 regulated genes in Wounding from PMID: 30772301 | SOX2 |
| TLE2     | SOX2 regulated genes in Wounding from PMID: 30772301 | SOX2 |
| ARHGAP39 | SOX2 regulated genes in Wounding from PMID: 30772301 | SOX2 |
| EFNA2    | SOX2 regulated genes in Wounding from PMID: 30772301 | SOX2 |
| ZNF821   | SOX2 regulated genes in Wounding from PMID: 30772301 | SOX2 |
| FGF19    | SOX2 regulated genes in Wounding from PMID: 30772301 | SOX2 |
| IL11RA   | SOX2 regulated genes in Wounding from PMID: 30772301 | SOX2 |
| MYADM    | SOX2 regulated genes in Wounding from PMID: 30772301 | SOX2 |
| UPF1     | SOX2 regulated genes in Wounding from PMID: 30772301 | SOX2 |
| PLCD3    | SOX2 regulated genes in Wounding from PMID: 30772301 | SOX2 |
| PRDX2    | SOX2 regulated genes in Wounding from PMID: 30772301 | SOX2 |
| ATP2B4   | SOX2 regulated genes in Wounding from PMID: 30772301 | SOX2 |
| MRT04    | SOX2 regulated genes in Wounding from PMID: 30772301 | SOX2 |
| UNC119B  | SOX2 regulated genes in Wounding from PMID: 30772301 | SOX2 |
| PLA2G2F  | SOX2 regulated genes in Wounding from PMID: 30772301 | SOX2 |
| ODC1     | SOX2 regulated genes in Wounding from PMID: 30772301 | SOX2 |
| FLNB     | SOX2 regulated genes in Wounding from PMID: 30772301 | SOX2 |
| SPTSSB   | SOX2 regulated genes in Wounding from PMID: 30772301 | SOX2 |
| MAP6D1   | SOX2 regulated genes in Wounding from PMID: 30772301 | SOX2 |
| YOD1     | SOX2 regulated genes in Wounding from PMID: 30772301 | SOX2 |
| PDIA4    | SOX2 regulated genes in Wounding from PMID: 30772301 | SOX2 |
| GNG4     | SOX2 regulated genes in Wounding from PMID: 30772301 | SOX2 |
| MTA2     | SOX2 regulated genes in Wounding from PMID: 30772301 | SOX2 |
| B3GNT3   | SOX2 regulated genes in Wounding from PMID: 30772301 | SOX2 |
| KRT17    | SOX2 regulated genes in Wounding from PMID: 30772301 | SOX2 |
| DDB1     | SOX2 regulated genes in Wounding from PMID: 30772301 | SOX2 |
| CGN      | SOX2 regulated genes in Wounding from PMID: 30772301 | SOX2 |
| CD44     | SOX2 regulated genes in Wounding from PMID: 30772301 | SOX2 |
| CHTF8    | SOX2 regulated genes in Wounding from PMID: 30772301 | SOX2 |
| VAMP8    | SOX2 regulated genes in Wounding from PMID: 30772301 | SOX2 |
| POR      | SOX2 regulated genes in Wounding from PMID: 30772301 | SOX2 |
| ARHGAP21 | SOX2 regulated genes in Wounding from PMID: 30772301 | SOX2 |
| SOX13    | SOX2 regulated genes in Wounding from PMID: 30772301 | SOX2 |
| COBLL1   | SOX2 regulated genes in Wounding from PMID: 30772301 | SOX2 |
| ARL15    | SOX2 regulated genes in Wounding from PMID: 30772301 | SOX2 |
| CCSER1   | SOX2 regulated genes in Wounding from PMID: 30772301 | SOX2 |
| CHDH     | SOX2 regulated genes in Wounding from PMID: 30772301 | SOX2 |
| PAFAH1B1 | SOX2 regulated genes in Wounding from PMID: 30772301 | SOX2 |
| SNTB2    | SOX2 regulated genes in Wounding from PMID: 30772301 | SOX2 |
| RNF40    | SOX2 regulated genes in Wounding from PMID: 30772301 | SOX2 |
| SS18L2   | SOX2 regulated genes in Wounding from PMID: 30772301 | SOX2 |

|           |                                                      |      |
|-----------|------------------------------------------------------|------|
| KLK10     | SOX2 regulated genes in Wounding from PMID: 30772301 | SOX2 |
| CYB561D1  | SOX2 regulated genes in Wounding from PMID: 30772301 | SOX2 |
| MYO18A    | SOX2 regulated genes in Wounding from PMID: 30772301 | SOX2 |
| CDH3      | SOX2 regulated genes in Wounding from PMID: 30772301 | SOX2 |
| HNRNPM    | SOX2 regulated genes in Wounding from PMID: 30772301 | SOX2 |
| ZNF608    | SOX2 regulated genes in Wounding from PMID: 30772301 | SOX2 |
| ATG4B     | SOX2 regulated genes in Wounding from PMID: 30772301 | SOX2 |
| CDK18     | SOX2 regulated genes in Wounding from PMID: 30772301 | SOX2 |
| HDAC5     | SOX2 regulated genes in Wounding from PMID: 30772301 | SOX2 |
| SNX7      | SOX2 regulated genes in Wounding from PMID: 30772301 | SOX2 |
| METTL16   | SOX2 regulated genes in Wounding from PMID: 30772301 | SOX2 |
| GBP6      | SOX2 regulated genes in Wounding from PMID: 30772301 | SOX2 |
| KPNA4     | SOX2 regulated genes in Wounding from PMID: 30772301 | SOX2 |
| CSNK1A1   | SOX2 regulated genes in Wounding from PMID: 30772301 | SOX2 |
| BLZF1     | SOX2 regulated genes in Wounding from PMID: 30772301 | SOX2 |
| PADI1     | SOX2 regulated genes in Wounding from PMID: 30772301 | SOX2 |
| TLN2      | SOX2 regulated genes in Wounding from PMID: 30772301 | SOX2 |
| KRTAP2-3  | SOX2 regulated genes in Wounding from PMID: 30772301 | SOX2 |
| KRTAP4-11 | SOX2 regulated genes in Wounding from PMID: 30772301 | SOX2 |
| KRTAP4-8  | SOX2 regulated genes in Wounding from PMID: 30772301 | SOX2 |
| CAPN12    | SOX2 regulated genes in Wounding from PMID: 30772301 | SOX2 |
| SPAG9     | SOX2 regulated genes in Wounding from PMID: 30772301 | SOX2 |
| TJP1      | SOX2 regulated genes in Wounding from PMID: 30772301 | SOX2 |
| C1orf52   | SOX2 regulated genes in Wounding from PMID: 30772301 | SOX2 |
| APLP2     | SOX2 regulated genes in Wounding from PMID: 30772301 | SOX2 |
| PTPN14    | SOX2 regulated genes in Wounding from PMID: 30772301 | SOX2 |
| ACBD3     | SOX2 regulated genes in Wounding from PMID: 30772301 | SOX2 |
| PDE4B     | SOX2 regulated genes in Wounding from PMID: 30772301 | SOX2 |
| PSPN      | SOX2 regulated genes in Wounding from PMID: 30772301 | SOX2 |
| HYOU1     | SOX2 regulated genes in Wounding from PMID: 30772301 | SOX2 |
| CREB3L4   | SOX2 regulated genes in Wounding from PMID: 30772301 | SOX2 |
| EDN2      | SOX2 regulated genes in Wounding from PMID: 30772301 | SOX2 |
| CHFR      | SOX2 regulated genes in Wounding from PMID: 30772301 | SOX2 |
| WDR12     | SOX2 regulated genes in Wounding from PMID: 30772301 | SOX2 |
| SLC40A1   | SOX2 regulated genes in Wounding from PMID: 30772301 | SOX2 |
| MICA      | SOX2 regulated genes in Wounding from PMID: 30772301 | SOX2 |
| CDV3      | SOX2 regulated genes in Wounding from PMID: 30772301 | SOX2 |
| FZD7      | SOX2 regulated genes in Wounding from PMID: 30772301 | SOX2 |
| CALR      | SOX2 regulated genes in Wounding from PMID: 30772301 | SOX2 |
| SPRR3     | SOX2 regulated genes in Wounding from PMID: 30772301 | SOX2 |
| TRAPPC4   | SOX2 regulated genes in Wounding from PMID: 30772301 | SOX2 |
| CLEC2D    | SOX2 regulated genes in Wounding from PMID: 30772301 | SOX2 |
| DENND2C   | SOX2 regulated genes in Wounding from PMID: 30772301 | SOX2 |
| FXYD4     | SOX2 regulated genes in Wounding from PMID: 30772301 | SOX2 |
| MAST4     | SOX2 regulated genes in Wounding from PMID: 30772301 | SOX2 |
| MEN1      | SOX2 regulated genes in Wounding from PMID: 30772301 | SOX2 |
| PRDM4     | SOX2 regulated genes in Wounding from PMID: 30772301 | SOX2 |
| BAHD1     | SOX2 regulated genes in Wounding from PMID: 30772301 | SOX2 |
| UBQLN4    | SOX2 regulated genes in Wounding from PMID: 30772301 | SOX2 |
| CELSR2    | SOX2 regulated genes in Wounding from PMID: 30772301 | SOX2 |
| TSEN2     | SOX2 regulated genes in Wounding from PMID: 30772301 | SOX2 |
| PRPF31    | SOX2 regulated genes in Wounding from PMID: 30772301 | SOX2 |
| EPS8L2    | SOX2 regulated genes in Wounding from PMID: 30772301 | SOX2 |
| IGSF9     | SOX2 regulated genes in Wounding from PMID: 30772301 | SOX2 |
| SLC16A6   | SOX2 regulated genes in Wounding from PMID: 30772301 | SOX2 |
| GTF2B     | SOX2 regulated genes in Wounding from PMID: 30772301 | SOX2 |
| SH3TC2    | SOX2 regulated genes in Wounding from PMID: 30772301 | SOX2 |
| EPHA1     | SOX2 regulated genes in Wounding from PMID: 30772301 | SOX2 |
| MLF1      | SOX2 regulated genes in Wounding from PMID: 30772301 | SOX2 |



|            |                                                      |      |
|------------|------------------------------------------------------|------|
| RUVBL2     | SOX2 regulated genes in Wounding from PMID: 30772301 | SOX2 |
| MAP7       | SOX2 regulated genes in Wounding from PMID: 30772301 | SOX2 |
| MYO19      | SOX2 regulated genes in Wounding from PMID: 30772301 | SOX2 |
| SF1        | SOX2 regulated genes in Wounding from PMID: 30772301 | SOX2 |
| CTTNBP2    | SOX2 regulated genes in Wounding from PMID: 30772301 | SOX2 |
| KDF1       | SOX2 regulated genes in Wounding from PMID: 30772301 | SOX2 |
| PPL        | SOX2 regulated genes in Wounding from PMID: 30772301 | SOX2 |
| EFHD1      | SOX2 regulated genes in Wounding from PMID: 30772301 | SOX2 |
| GSTM3      | SOX2 regulated genes in Wounding from PMID: 30772301 | SOX2 |
| TIAM2      | SOX2 regulated genes in Wounding from PMID: 30772301 | SOX2 |
| CMPK1      | SOX2 regulated genes in Wounding from PMID: 30772301 | SOX2 |
| KRTAP1-5   | SOX2 regulated genes in Wounding from PMID: 30772301 | SOX2 |
| KRTAP1-3   | SOX2 regulated genes in Wounding from PMID: 30772301 | SOX2 |
| KRTAP1-1   | SOX2 regulated genes in Wounding from PMID: 30772301 | SOX2 |
| DNAJA4     | SOX2 regulated genes in Wounding from PMID: 30772301 | SOX2 |
| ERC2       | SOX2 regulated genes in Wounding from PMID: 30772301 | SOX2 |
| PPFIBP2    | SOX2 regulated genes in Wounding from PMID: 30772301 | SOX2 |
| INTS4      | SOX2 regulated genes in Wounding from PMID: 30772301 | SOX2 |
| S100A6     | SOX2 regulated genes in Wounding from PMID: 30772301 | SOX2 |
| MOB4       | SOX2 regulated genes in Wounding from PMID: 30772301 | SOX2 |
| KLC1       | SOX2 regulated genes in Wounding from PMID: 30772301 | SOX2 |
| LSR        | SOX2 regulated genes in Wounding from PMID: 30772301 | SOX2 |
| CAPN8      | SOX2 regulated genes in Wounding from PMID: 30772301 | SOX2 |
| NHSL1      | SOX2 regulated genes in Wounding from PMID: 30772301 | SOX2 |
| HES2       | SOX2 regulated genes in Wounding from PMID: 30772301 | SOX2 |
| S100A16    | SOX2 regulated genes in Wounding from PMID: 30772301 | SOX2 |
| PUM1       | SOX2 regulated genes in Wounding from PMID: 30772301 | SOX2 |
| PLXNA2     | SOX2 regulated genes in Wounding from PMID: 30772301 | SOX2 |
| PKD1L3     | SOX2 regulated genes in Wounding from PMID: 30772301 | SOX2 |
| UBE2G1     | SOX2 regulated genes in Wounding from PMID: 30772301 | SOX2 |
| NDEL1      | SOX2 regulated genes in Wounding from PMID: 30772301 | SOX2 |
| SGMS2      | SOX2 regulated genes in Wounding from PMID: 30772301 | SOX2 |
| IQGAP1     | SOX2 regulated genes in Wounding from PMID: 30772301 | SOX2 |
| NRDC       | SOX2 regulated genes in Wounding from PMID: 30772301 | SOX2 |
| CSGALNACT1 | SOX2 regulated genes in Wounding from PMID: 30772301 | SOX2 |
| LRRC8E     | SOX2 regulated genes in Wounding from PMID: 30772301 | SOX2 |
| GMCL1      | SOX2 regulated genes in Wounding from PMID: 30772301 | SOX2 |
| WNT11      | SOX2 regulated genes in Wounding from PMID: 30772301 | SOX2 |
| GALNT3     | SOX2 regulated genes in Wounding from PMID: 30772301 | SOX2 |
| PDLIM7     | SOX2 regulated genes in Wounding from PMID: 30772301 | SOX2 |
| WDR26      | SOX2 regulated genes in Wounding from PMID: 30772301 | SOX2 |
| OCLN       | SOX2 regulated genes in Wounding from PMID: 30772301 | SOX2 |
| FARP2      | SOX2 regulated genes in Wounding from PMID: 30772301 | SOX2 |
| RGS12      | SOX2 regulated genes in Wounding from PMID: 30772301 | SOX2 |
| TM4SF4     | SOX2 regulated genes in Wounding from PMID: 30772301 | SOX2 |
| CLIP1      | SOX2 regulated genes in Wounding from PMID: 30772301 | SOX2 |
| ADGRL3     | SOX2 regulated genes in Wounding from PMID: 30772301 | SOX2 |
| KRT34      | SOX2 regulated genes in Wounding from PMID: 30772301 | SOX2 |
| NKAPL      | SOX2 regulated genes in Wounding from PMID: 30772301 | SOX2 |
| BHLHE40    | SOX2 regulated genes in Wounding from PMID: 30772301 | SOX2 |
| NIPAL3     | SOX2 regulated genes in Wounding from PMID: 30772301 | SOX2 |
| KALRN      | SOX2 regulated genes in Wounding from PMID: 30772301 | SOX2 |
| ETV2       | SOX2 regulated genes in Wounding from PMID: 30772301 | SOX2 |
| B3GALNT2   | SOX2 regulated genes in Wounding from PMID: 30772301 | SOX2 |
| GTF2I      | SOX2 regulated genes in Wounding from PMID: 30772301 | SOX2 |
| HNRNPC     | SOX2 regulated genes in Wounding from PMID: 30772301 | SOX2 |
| HNRNPCL1   | SOX2 regulated genes in Wounding from PMID: 30772301 | SOX2 |
| HNRNPCL2   | SOX2 regulated genes in Wounding from PMID: 30772301 | SOX2 |
| LRIG1      | SOX2 regulated genes in Wounding from PMID: 30772301 | SOX2 |

|          |                                                      |      |
|----------|------------------------------------------------------|------|
| TRIM33   | SOX2 regulated genes in Wounding from PMID: 30772301 | SOX2 |
| SPNS2    | SOX2 regulated genes in Wounding from PMID: 30772301 | SOX2 |
| HAS3     | SOX2 regulated genes in Wounding from PMID: 30772301 | SOX2 |
| INSIG2   | SOX2 regulated genes in Wounding from PMID: 30772301 | SOX2 |
| BNIP1    | SOX2 regulated genes in Wounding from PMID: 30772301 | SOX2 |
| CETN3    | SOX2 regulated genes in Wounding from PMID: 30772301 | SOX2 |
| TRAK2    | SOX2 regulated genes in Wounding from PMID: 30772301 | SOX2 |
| MAST1    | SOX2 regulated genes in Wounding from PMID: 30772301 | SOX2 |
| NECTIN4  | SOX2 regulated genes in Wounding from PMID: 30772301 | SOX2 |
| ACTN4    | SOX2 regulated genes in Wounding from PMID: 30772301 | SOX2 |
| TNFAIP6  | SOX2 regulated genes in Wounding from PMID: 30772301 | SOX2 |
| TMBIM1   | SOX2 regulated genes in Wounding from PMID: 30772301 | SOX2 |
| CRNN     | SOX2 regulated genes in Wounding from PMID: 30772301 | SOX2 |
| SMIM5    | SOX2 regulated genes in Wounding from PMID: 30772301 | SOX2 |
| SIRT6    | SOX2 regulated genes in Wounding from PMID: 30772301 | SOX2 |
| FAM167A  | SOX2 regulated genes in Wounding from PMID: 30772301 | SOX2 |
| DNAJB2   | SOX2 regulated genes in Wounding from PMID: 30772301 | SOX2 |
| GOLT1B   | SOX2 regulated genes in Wounding from PMID: 30772301 | SOX2 |
| KLHL18   | SOX2 regulated genes in Wounding from PMID: 30772301 | SOX2 |
| ZYX      | SOX2 regulated genes in Wounding from PMID: 30772301 | SOX2 |
| ATXN1    | SOX2 regulated genes in Wounding from PMID: 30772301 | SOX2 |
| ELAVL1   | SOX2 regulated genes in Wounding from PMID: 30772301 | SOX2 |
| ACOT1    | SOX2 regulated genes in Wounding from PMID: 30772301 | SOX2 |
| ACOT2    | SOX2 regulated genes in Wounding from PMID: 30772301 | SOX2 |
| NCKAP5   | SOX2 regulated genes in Wounding from PMID: 30772301 | SOX2 |
| DSP      | SOX2 regulated genes in Wounding from PMID: 30772301 | SOX2 |
| PFDN1    | SOX2 regulated genes in Wounding from PMID: 30772301 | SOX2 |
| TET3     | SOX2 regulated genes in Wounding from PMID: 30772301 | SOX2 |
| KRT32    | SOX2 regulated genes in Wounding from PMID: 30772301 | SOX2 |
| TMEM120B | SOX2 regulated genes in Wounding from PMID: 30772301 | SOX2 |
| CDK2AP1  | SOX2 regulated genes in Wounding from PMID: 30772301 | SOX2 |
| PRR7     | SOX2 regulated genes in Wounding from PMID: 30772301 | SOX2 |
| TMEM184A | SOX2 regulated genes in Wounding from PMID: 30772301 | SOX2 |
| SMUG1    | SOX2 regulated genes in Wounding from PMID: 30772301 | SOX2 |
| RAP1GAP  | SOX2 regulated genes in Wounding from PMID: 30772301 | SOX2 |
| FURIN    | SOX2 regulated genes in Wounding from PMID: 30772301 | SOX2 |
| PTPN11   | SOX2 regulated genes in Wounding from PMID: 30772301 | SOX2 |
| EIF2B3   | SOX2 regulated genes in Wounding from PMID: 30772301 | SOX2 |
| AKAP9    | SOX2 regulated genes in Wounding from PMID: 30772301 | SOX2 |
| SERTAD4  | SOX2 regulated genes in Wounding from PMID: 30772301 | SOX2 |
| SNRPD2   | SOX2 regulated genes in Wounding from PMID: 30772301 | SOX2 |
| SMIM7    | SOX2 regulated genes in Wounding from PMID: 30772301 | SOX2 |
| MYL6     | SOX2 regulated genes in Wounding from PMID: 30772301 | SOX2 |
| TLX1     | SOX2 regulated genes in Wounding from PMID: 30772301 | SOX2 |
| TPPP     | SOX2 regulated genes in Wounding from PMID: 30772301 | SOX2 |
| KRTCAP3  | SOX2 regulated genes in Wounding from PMID: 30772301 | SOX2 |
| TBCD     | SOX2 regulated genes in Wounding from PMID: 30772301 | SOX2 |
| PIGM     | SOX2 regulated genes in Wounding from PMID: 30772301 | SOX2 |
| FZD3     | SOX2 regulated genes in Wounding from PMID: 30772301 | SOX2 |
| RNF222   | SOX2 regulated genes in Wounding from PMID: 30772301 | SOX2 |
| LINGO1   | SOX2 regulated genes in Wounding from PMID: 30772301 | SOX2 |
| SPACA6   | SOX2 regulated genes in Wounding from PMID: 30772301 | SOX2 |
| LMNB2    | SOX2 regulated genes in Wounding from PMID: 30772301 | SOX2 |
| NAPEPLD  | SOX2 regulated genes in Wounding from PMID: 30772301 | SOX2 |
| ABCF3    | SOX2 regulated genes in Wounding from PMID: 30772301 | SOX2 |
| ALG8     | SOX2 regulated genes in Wounding from PMID: 30772301 | SOX2 |
| TMED2    | SOX2 regulated genes in Wounding from PMID: 30772301 | SOX2 |
| HES1     | SOX2 regulated genes in Wounding from PMID: 30772301 | SOX2 |
| SFPQ     | SOX2 regulated genes in Wounding from PMID: 30772301 | SOX2 |

|          |                                                      |      |
|----------|------------------------------------------------------|------|
| MARVELD3 | SOX2 regulated genes in Wounding from PMID: 30772301 | SOX2 |
| PYROXD1  | SOX2 regulated genes in Wounding from PMID: 30772301 | SOX2 |
| NUAK1    | SOX2 regulated genes in Wounding from PMID: 30772301 | SOX2 |
| LTBP4    | SOX2 regulated genes in Wounding from PMID: 30772301 | SOX2 |
| VANGL2   | SOX2 regulated genes in Wounding from PMID: 30772301 | SOX2 |
| EFNA3    | SOX2 regulated genes in Wounding from PMID: 30772301 | SOX2 |
| JMJD4    | SOX2 regulated genes in Wounding from PMID: 30772301 | SOX2 |
| CALM1    | SOX2 regulated genes in Wounding from PMID: 30772301 | SOX2 |
| PRKCZ    | SOX2 regulated genes in Wounding from PMID: 30772301 | SOX2 |
| DDR1     | SOX2 regulated genes in Wounding from PMID: 30772301 | SOX2 |
| SNRPA1   | SOX2 regulated genes in Wounding from PMID: 30772301 | SOX2 |
| ARHGEF28 | SOX2 regulated genes in Wounding from PMID: 30772301 | SOX2 |
| PHF23    | SOX2 regulated genes in Wounding from PMID: 30772301 | SOX2 |
| SLC2A1   | SOX2 regulated genes in Wounding from PMID: 30772301 | SOX2 |
| CNTNAP1  | SOX2 regulated genes in Wounding from PMID: 30772301 | SOX2 |
| VDR      | SOX2 regulated genes in Wounding from PMID: 30772301 | SOX2 |
| LMNA     | SOX2 regulated genes in Wounding from PMID: 30772301 | SOX2 |
| GPRC5D   | SOX2 regulated genes in Wounding from PMID: 30772301 | SOX2 |
| COPB2    | SOX2 regulated genes in Wounding from PMID: 30772301 | SOX2 |
| EXOC7    | SOX2 regulated genes in Wounding from PMID: 30772301 | SOX2 |
| GAS8     | SOX2 regulated genes in Wounding from PMID: 30772301 | SOX2 |
| GLI2     | SOX2 regulated genes in Wounding from PMID: 30772301 | SOX2 |
| AFDN     | SOX2 regulated genes in Wounding from PMID: 30772301 | SOX2 |
| THEM4    | SOX2 regulated genes in Wounding from PMID: 30772301 | SOX2 |
| ST14     | SOX2 regulated genes in Wounding from PMID: 30772301 | SOX2 |
| RRM2     | SOX2 regulated genes in Wounding from PMID: 30772301 | SOX2 |
| RABL2A   | SOX2 regulated genes in Wounding from PMID: 30772301 | SOX2 |
| PPM1G    | SOX2 regulated genes in Wounding from PMID: 30772301 | SOX2 |
| KIF21A   | SOX2 regulated genes in Wounding from PMID: 30772301 | SOX2 |
| NPM2     | SOX2 regulated genes in Wounding from PMID: 30772301 | SOX2 |
| EIF2S3B  | SOX2 regulated genes in Wounding from PMID: 30772301 | SOX2 |
| KRT8     | SOX2 regulated genes in Wounding from PMID: 30772301 | SOX2 |
| NKD2     | SOX2 regulated genes in Wounding from PMID: 30772301 | SOX2 |
| NUDT21   | SOX2 regulated genes in Wounding from PMID: 30772301 | SOX2 |
| SYT13    | SOX2 regulated genes in Wounding from PMID: 30772301 | SOX2 |
| TNN      | SOX2 regulated genes in Wounding from PMID: 30772301 | SOX2 |
| XXYL1    | SOX2 regulated genes in Wounding from PMID: 30772301 | SOX2 |
| LMTK3    | SOX2 regulated genes in Wounding from PMID: 30772301 | SOX2 |
| THUMPD3  | SOX2 regulated genes in Wounding from PMID: 30772301 | SOX2 |
| FOXJ1    | SOX2 regulated genes in Wounding from PMID: 30772301 | SOX2 |
| ENAH     | SOX2 regulated genes in Wounding from PMID: 30772301 | SOX2 |
| ARHGAP32 | SOX2 regulated genes in Wounding from PMID: 30772301 | SOX2 |
| CAPN2    | SOX2 regulated genes in Wounding from PMID: 30772301 | SOX2 |
| TMEM54   | SOX2 regulated genes in Wounding from PMID: 30772301 | SOX2 |
| VPS45    | SOX2 regulated genes in Wounding from PMID: 30772301 | SOX2 |
| FAM8A1   | SOX2 regulated genes in Wounding from PMID: 30772301 | SOX2 |
| TMEM231  | SOX2 regulated genes in Wounding from PMID: 30772301 | SOX2 |
| S100A14  | SOX2 regulated genes in Wounding from PMID: 30772301 | SOX2 |
| ARHGEF5  | SOX2 regulated genes in Wounding from PMID: 30772301 | SOX2 |
| PPP1R2   | SOX2 regulated genes in Wounding from PMID: 30772301 | SOX2 |
| PPP1R2B  | SOX2 regulated genes in Wounding from PMID: 30772301 | SOX2 |
| RAB3IP   | SOX2 regulated genes in Wounding from PMID: 30772301 | SOX2 |
| TAX1BP1  | SOX2 regulated genes in Wounding from PMID: 30772301 | SOX2 |
| PM20D1   | SOX2 regulated genes in Wounding from PMID: 30772301 | SOX2 |
| EMP1     | SOX2 regulated genes in Wounding from PMID: 30772301 | SOX2 |
| FZD10    | SOX2 regulated genes in Wounding from PMID: 30772301 | SOX2 |
| UBE2O    | SOX2 regulated genes in Wounding from PMID: 30772301 | SOX2 |
| FAM98A   | SOX2 regulated genes in Wounding from PMID: 30772301 | SOX2 |
| CNN3     | SOX2 regulated genes in Wounding from PMID: 30772301 | SOX2 |

|          |                                                      |      |
|----------|------------------------------------------------------|------|
| STK16    | SOX2 regulated genes in Wounding from PMID: 30772301 | SOX2 |
| FBRS     | SOX2 regulated genes in Wounding from PMID: 30772301 | SOX2 |
| TCERG1   | SOX2 regulated genes in Wounding from PMID: 30772301 | SOX2 |
| FAM136A  | SOX2 regulated genes in Wounding from PMID: 30772301 | SOX2 |
| ANP32E   | SOX2 regulated genes in Wounding from PMID: 30772301 | SOX2 |
| NEMF     | SOX2 regulated genes in Wounding from PMID: 30772301 | SOX2 |
| ZNF326   | SOX2 regulated genes in Wounding from PMID: 30772301 | SOX2 |
| MTUS1    | SOX2 regulated genes in Wounding from PMID: 30772301 | SOX2 |
| ADGRG1   | SOX2 regulated genes in Wounding from PMID: 30772301 | SOX2 |
| NBEAL2   | SOX2 regulated genes in Wounding from PMID: 30772301 | SOX2 |
| SIPA1L2  | SOX2 regulated genes in Wounding from PMID: 30772301 | SOX2 |
| LLGL1    | SOX2 regulated genes in Wounding from PMID: 30772301 | SOX2 |
| SPG7     | SOX2 regulated genes in Wounding from PMID: 30772301 | SOX2 |
| MTX2     | SOX2 regulated genes in Wounding from PMID: 30772301 | SOX2 |
| SHKBP1   | SOX2 regulated genes in Wounding from PMID: 30772301 | SOX2 |
| FNBP1L   | SOX2 regulated genes in Wounding from PMID: 30772301 | SOX2 |
| BAZ1A    | SOX2 regulated genes in Wounding from PMID: 30772301 | SOX2 |
| KCTD3    | SOX2 regulated genes in Wounding from PMID: 30772301 | SOX2 |
| SLC6A2   | SOX2 regulated genes in Wounding from PMID: 30772301 | SOX2 |
| VGLL4    | SOX2 regulated genes in Wounding from PMID: 30772301 | SOX2 |
| OST4     | SOX2 regulated genes in Wounding from PMID: 30772301 | SOX2 |
| ARHGAP20 | SOX2 regulated genes in Wounding from PMID: 30772301 | SOX2 |
| DNAJB1   | SOX2 regulated genes in Wounding from PMID: 30772301 | SOX2 |
| EPHX4    | SOX2 regulated genes in Wounding from PMID: 30772301 | SOX2 |
| SIKE1    | SOX2 regulated genes in Wounding from PMID: 30772301 | SOX2 |
| CD9      | SOX2 regulated genes in Wounding from PMID: 30772301 | SOX2 |
| DNAJC11  | SOX2 regulated genes in Wounding from PMID: 30772301 | SOX2 |
| KRT40    | SOX2 regulated genes in Wounding from PMID: 30772301 | SOX2 |
| CNOT9    | SOX2 regulated genes in Wounding from PMID: 30772301 | SOX2 |
| MAP4     | SOX2 regulated genes in Wounding from PMID: 30772301 | SOX2 |
| COG1     | SOX2 regulated genes in Wounding from PMID: 30772301 | SOX2 |
| PTPN12   | SOX2 regulated genes in Wounding from PMID: 30772301 | SOX2 |
| IL1F10   | SOX2 regulated genes in Wounding from PMID: 30772301 | SOX2 |
| MAP7D1   | SOX2 regulated genes in Wounding from PMID: 30772301 | SOX2 |
| SH3BP5L  | SOX2 regulated genes in Wounding from PMID: 30772301 | SOX2 |
| RHBDD2   | SOX2 regulated genes in Wounding from PMID: 30772301 | SOX2 |
| EPHB2    | SOX2 regulated genes in Wounding from PMID: 30772301 | SOX2 |
| DAPL1    | SOX2 regulated genes in Wounding from PMID: 30772301 | SOX2 |
| ERBB2    | SOX2 regulated genes in Wounding from PMID: 30772301 | SOX2 |
| SAMD4B   | SOX2 regulated genes in Wounding from PMID: 30772301 | SOX2 |
| LPCAT4   | SOX2 regulated genes in Wounding from PMID: 30772301 | SOX2 |
| CDC14A   | SOX2 regulated genes in Wounding from PMID: 30772301 | SOX2 |
| WNT9A    | SOX2 regulated genes in Wounding from PMID: 30772301 | SOX2 |
| GTF2H3   | SOX2 regulated genes in Wounding from PMID: 30772301 | SOX2 |
| HEATR3   | SOX2 regulated genes in Wounding from PMID: 30772301 | SOX2 |
| PKP1     | SOX2 regulated genes in Wounding from PMID: 30772301 | SOX2 |
| ANKRD13C | SOX2 regulated genes in Wounding from PMID: 30772301 | SOX2 |
| ZC3H11A  | SOX2 regulated genes in Wounding from PMID: 30772301 | SOX2 |
| ZC3H11B  | SOX2 regulated genes in Wounding from PMID: 30772301 | SOX2 |
| LMBRD2   | SOX2 regulated genes in Wounding from PMID: 30772301 | SOX2 |
| NECAB2   | SOX2 regulated genes in Wounding from PMID: 30772301 | SOX2 |
| SFN      | SOX2 regulated genes in Wounding from PMID: 30772301 | SOX2 |
| GRHL1    | SOX2 regulated genes in Wounding from PMID: 30772301 | SOX2 |
| MYBPC3   | SOX2 regulated genes in Wounding from PMID: 30772301 | SOX2 |
| AMOTL2   | SOX2 regulated genes in Wounding from PMID: 30772301 | SOX2 |
| PHLDA1   | SOX2 regulated genes in Wounding from PMID: 30772301 | SOX2 |
| TRIM39   | SOX2 regulated genes in Wounding from PMID: 30772301 | SOX2 |
| TUBA1C   | SOX2 regulated genes in Wounding from PMID: 30772301 | SOX2 |
| EML2     | SOX2 regulated genes in Wounding from PMID: 30772301 | SOX2 |

|          |                                                      |      |
|----------|------------------------------------------------------|------|
| HNRNPH1  | SOX2 regulated genes in Wounding from PMID: 30772301 | SOX2 |
| TRIM28   | SOX2 regulated genes in Wounding from PMID: 30772301 | SOX2 |
| KRTAP3-1 | SOX2 regulated genes in Wounding from PMID: 30772301 | SOX2 |
| KRT23    | SOX2 regulated genes in Wounding from PMID: 30772301 | SOX2 |
| ERP44    | SOX2 regulated genes in Wounding from PMID: 30772301 | SOX2 |
| F2RL1    | SOX2 regulated genes in Wounding from PMID: 30772301 | SOX2 |
| SPRY4    | SOX2 regulated genes in Wounding from PMID: 30772301 | SOX2 |
| DUOXA1   | SOX2 regulated genes in Wounding from PMID: 30772301 | SOX2 |
| RAD17    | SOX2 regulated genes in Wounding from PMID: 30772301 | SOX2 |
| STK11    | SOX2 regulated genes in Wounding from PMID: 30772301 | SOX2 |
| USP6NL   | SOX2 regulated genes in Wounding from PMID: 30772301 | SOX2 |
| EPHB1    | SOX2 regulated genes in Wounding from PMID: 30772301 | SOX2 |
| SNAP47   | SOX2 regulated genes in Wounding from PMID: 30772301 | SOX2 |
| RBM14    | SOX2 regulated genes in Wounding from PMID: 30772301 | SOX2 |
| MYT1L    | SOX2 regulated genes in Wounding from PMID: 30772301 | SOX2 |
| RABIF    | SOX2 regulated genes in Wounding from PMID: 30772301 | SOX2 |
| CDC42EP4 | SOX2 regulated genes in Wounding from PMID: 30772301 | SOX2 |
| F2R      | SOX2 regulated genes in Wounding from PMID: 30772301 | SOX2 |
| CAMSAP3  | SOX2 regulated genes in Wounding from PMID: 30772301 | SOX2 |
| KPRP     | SOX2 regulated genes in Wounding from PMID: 30772301 | SOX2 |
| THOC7    | SOX2 regulated genes in Wounding from PMID: 30772301 | SOX2 |
| TRAPPC3  | SOX2 regulated genes in Wounding from PMID: 30772301 | SOX2 |
| CDC25A   | SOX2 regulated genes in Wounding from PMID: 30772301 | SOX2 |
| OLFM2    | SOX2 regulated genes in Wounding from PMID: 30772301 | SOX2 |
| WSB2     | SOX2 regulated genes in Wounding from PMID: 30772301 | SOX2 |
| GPATCH4  | SOX2 regulated genes in Wounding from PMID: 30772301 | SOX2 |
| PLK2     | SOX2 regulated genes in Wounding from PMID: 30772301 | SOX2 |
| HMGXB3   | SOX2 regulated genes in Wounding from PMID: 30772301 | SOX2 |
| PCDHB16  | SOX2 regulated genes in Wounding from PMID: 30772301 | SOX2 |
| EIF4G1   | SOX2 regulated genes in Wounding from PMID: 30772301 | SOX2 |
| VPS37B   | SOX2 regulated genes in Wounding from PMID: 30772301 | SOX2 |
| NPPC     | SOX2 regulated genes in Wounding from PMID: 30772301 | SOX2 |
| TAGLN2   | SOX2 regulated genes in Wounding from PMID: 30772301 | SOX2 |
| P3H2     | SOX2 regulated genes in Wounding from PMID: 30772301 | SOX2 |
| NPEPPS   | SOX2 regulated genes in Wounding from PMID: 30772301 | SOX2 |
| SEC22B   | SOX2 regulated genes in Wounding from PMID: 30772301 | SOX2 |
| SH3PXD2A | SOX2 regulated genes in Wounding from PMID: 30772301 | SOX2 |
| KRT39    | SOX2 regulated genes in Wounding from PMID: 30772301 | SOX2 |
| ALDH3B2  | SOX2 regulated genes in Wounding from PMID: 30772301 | SOX2 |
| GRAMD2A  | SOX2 regulated genes in Wounding from PMID: 30772301 | SOX2 |
| PCBP1    | SOX2 regulated genes in Wounding from PMID: 30772301 | SOX2 |
| HS2ST1   | SOX2 regulated genes in Wounding from PMID: 30772301 | SOX2 |
| KRAS     | SOX2 regulated genes in Wounding from PMID: 30772301 | SOX2 |
| FAM83E   | SOX2 regulated genes in Wounding from PMID: 30772301 | SOX2 |
| PTHLH    | SOX2 regulated genes in Wounding from PMID: 30772301 | SOX2 |
| USP31    | SOX2 regulated genes in Wounding from PMID: 30772301 | SOX2 |
| POLR3D   | SOX2 regulated genes in Wounding from PMID: 30772301 | SOX2 |
| S100A1   | SOX2 regulated genes in Wounding from PMID: 30772301 | SOX2 |
| FUT1     | SOX2 regulated genes in Wounding from PMID: 30772301 | SOX2 |
| NT5E     | SOX2 regulated genes in Wounding from PMID: 30772301 | SOX2 |
| SGK1     | SOX2 regulated genes in Wounding from PMID: 30772301 | SOX2 |
| ZNF23    | SOX2 regulated genes in Wounding from PMID: 30772301 | SOX2 |
| HMCN1    | SOX2 regulated genes in Wounding from PMID: 30772301 | SOX2 |
| NECTIN2  | SOX2 regulated genes in Wounding from PMID: 30772301 | SOX2 |
| EPN3     | SOX2 regulated genes in Wounding from PMID: 30772301 | SOX2 |
| FOXO6    | SOX2 regulated genes in Wounding from PMID: 30772301 | SOX2 |
| G3BP1    | SOX2 regulated genes in Wounding from PMID: 30772301 | SOX2 |
| CAB39    | SOX2 regulated genes in Wounding from PMID: 30772301 | SOX2 |
| PCBP4    | SOX2 regulated genes in Wounding from PMID: 30772301 | SOX2 |

|          |                                                      |      |
|----------|------------------------------------------------------|------|
| THOC3    | SOX2 regulated genes in Wounding from PMID: 30772301 | SOX2 |
| YAF2     | SOX2 regulated genes in Wounding from PMID: 30772301 | SOX2 |
| GZMM     | SOX2 regulated genes in Wounding from PMID: 30772301 | SOX2 |
| CYP2S1   | SOX2 regulated genes in Wounding from PMID: 30772301 | SOX2 |
| SUCO     | SOX2 regulated genes in Wounding from PMID: 30772301 | SOX2 |
| CAST     | SOX2 regulated genes in Wounding from PMID: 30772301 | SOX2 |
| RNF225   | SOX2 regulated genes in Wounding from PMID: 30772301 | SOX2 |
| KLHL12   | SOX2 regulated genes in Wounding from PMID: 30772301 | SOX2 |
| STON2    | SOX2 regulated genes in Wounding from PMID: 30772301 | SOX2 |
| SLC20A1  | SOX2 regulated genes in Wounding from PMID: 30772301 | SOX2 |
| SCNN1A   | SOX2 regulated genes in Wounding from PMID: 30772301 | SOX2 |
| NAPA     | SOX2 regulated genes in Wounding from PMID: 30772301 | SOX2 |
| TMEM107  | SOX2 regulated genes in Wounding from PMID: 30772301 | SOX2 |
| FGF22    | SOX2 regulated genes in Wounding from PMID: 30772301 | SOX2 |
| DUSP11   | SOX2 regulated genes in Wounding from PMID: 30772301 | SOX2 |
| NOP58    | SOX2 regulated genes in Wounding from PMID: 30772301 | SOX2 |
| MFN1     | SOX2 regulated genes in Wounding from PMID: 30772301 | SOX2 |
| UCK2     | SOX2 regulated genes in Wounding from PMID: 30772301 | SOX2 |
| RNF10    | SOX2 regulated genes in Wounding from PMID: 30772301 | SOX2 |
| CLIP4    | SOX2 regulated genes in Wounding from PMID: 30772301 | SOX2 |
| ZSWIM4   | SOX2 regulated genes in Wounding from PMID: 30772301 | SOX2 |
| RAB10    | SOX2 regulated genes in Wounding from PMID: 30772301 | SOX2 |
| KDM6B    | SOX2 regulated genes in Wounding from PMID: 30772301 | SOX2 |
| SPINK6   | SOX2 regulated genes in Wounding from PMID: 30772301 | SOX2 |
| LEMD3    | SOX2 regulated genes in Wounding from PMID: 30772301 | SOX2 |
| KDM1A    | SOX2 regulated genes in Wounding from PMID: 30772301 | SOX2 |
| TTYH2    | SOX2 regulated genes in Wounding from PMID: 30772301 | SOX2 |
| ANAPC13  | SOX2 regulated genes in Wounding from PMID: 30772301 | SOX2 |
| EPHB3    | SOX2 regulated genes in Wounding from PMID: 30772301 | SOX2 |
| FBXO45   | SOX2 regulated genes in Wounding from PMID: 30772301 | SOX2 |
| RHBG     | SOX2 regulated genes in Wounding from PMID: 30772301 | SOX2 |
| SEC13    | SOX2 regulated genes in Wounding from PMID: 30772301 | SOX2 |
| MAPK6    | SOX2 regulated genes in Wounding from PMID: 30772301 | SOX2 |
| ZNF750   | SOX2 regulated genes in Wounding from PMID: 30772301 | SOX2 |
| CPS1     | SOX2 regulated genes in Wounding from PMID: 30772301 | SOX2 |
| GOLGA7   | SOX2 regulated genes in Wounding from PMID: 30772301 | SOX2 |
| CUL1     | SOX2 regulated genes in Wounding from PMID: 30772301 | SOX2 |
| TRIM16   | SOX2 regulated genes in Wounding from PMID: 30772301 | SOX2 |
| IRF6     | SOX2 regulated genes in Wounding from PMID: 30772301 | SOX2 |
| LRRC20   | SOX2 regulated genes in Wounding from PMID: 30772301 | SOX2 |
| RASSF1   | SOX2 regulated genes in Wounding from PMID: 30772301 | SOX2 |
| INTS7    | SOX2 regulated genes in Wounding from PMID: 30772301 | SOX2 |
| SPINT2   | SOX2 regulated genes in Wounding from PMID: 30772301 | SOX2 |
| RYK      | SOX2 regulated genes in Wounding from PMID: 30772301 | SOX2 |
| SPTBN2   | SOX2 regulated genes in Wounding from PMID: 30772301 | SOX2 |
| FPGT     | SOX2 regulated genes in Wounding from PMID: 30772301 | SOX2 |
| KRTAP5-8 | SOX2 regulated genes in Wounding from PMID: 30772301 | SOX2 |
| NRAS     | SOX2 regulated genes in Wounding from PMID: 30772301 | SOX2 |
| WNT5A    | SOX2 regulated genes in Wounding from PMID: 30772301 | SOX2 |
| CDC42EP3 | SOX2 regulated genes in Wounding from PMID: 30772301 | SOX2 |
| CUL3     | SOX2 regulated genes in Wounding from PMID: 30772301 | SOX2 |
| CAMSAP2  | SOX2 regulated genes in Wounding from PMID: 30772301 | SOX2 |
| ASCL4    | SOX2 regulated genes in Wounding from PMID: 30772301 | SOX2 |
| NOTUM    | SOX2 regulated genes in Wounding from PMID: 30772301 | SOX2 |
| BBS5     | SOX2 regulated genes in Wounding from PMID: 30772301 | SOX2 |
| GPA33    | SOX2 regulated genes in Wounding from PMID: 30772301 | SOX2 |
| GNB1     | SOX2 regulated genes in Wounding from PMID: 30772301 | SOX2 |
| CYP4F11  | SOX2 regulated genes in Wounding from PMID: 30772301 | SOX2 |
| CYP4A11  | SOX2 regulated genes in Wounding from PMID: 30772301 | SOX2 |

|          |                                                      |      |
|----------|------------------------------------------------------|------|
| MARVELD2 | SOX2 regulated genes in Wounding from PMID: 30772301 | SOX2 |
| SDC1     | SOX2 regulated genes in Wounding from PMID: 30772301 | SOX2 |
| KRT33A   | SOX2 regulated genes in Wounding from PMID: 30772301 | SOX2 |
| BMPR2    | SOX2 regulated genes in Wounding from PMID: 30772301 | SOX2 |
| PATJ     | SOX2 regulated genes in Wounding from PMID: 30772301 | SOX2 |
| ARF1     | SOX2 regulated genes in Wounding from PMID: 30772301 | SOX2 |
| TCF3     | SOX2 regulated genes in Wounding from PMID: 30772301 | SOX2 |
| CORO1C   | SOX2 regulated genes in Wounding from PMID: 30772301 | SOX2 |
| EZR      | SOX2 regulated genes in Wounding from PMID: 30772301 | SOX2 |
| APPBP2   | SOX2 regulated genes in Wounding from PMID: 30772301 | SOX2 |
| RBM12B   | SOX2 regulated genes in Wounding from PMID: 30772301 | SOX2 |
| RASA2    | SOX2 regulated genes in Wounding from PMID: 30772301 | SOX2 |
| ATP1A1   | SOX2 regulated genes in Wounding from PMID: 30772301 | SOX2 |
| DUOX1    | SOX2 regulated genes in Wounding from PMID: 30772301 | SOX2 |
| LSM12    | SOX2 regulated genes in Wounding from PMID: 30772301 | SOX2 |
| GPX2     | SOX2 regulated genes in Wounding from PMID: 30772301 | SOX2 |
| GPR87    | SOX2 regulated genes in Wounding from PMID: 30772301 | SOX2 |
| KRTAP3-3 | SOX2 regulated genes in Wounding from PMID: 30772301 | SOX2 |
| KRTAP3-2 | SOX2 regulated genes in Wounding from PMID: 30772301 | SOX2 |
| DUSP7    | SOX2 regulated genes in Wounding from PMID: 30772301 | SOX2 |
| ALPL1    | SOX2 regulated genes in Wounding from PMID: 30772301 | SOX2 |
| GOLIM4   | SOX2 regulated genes in Wounding from PMID: 30772301 | SOX2 |
| CTNND1   | SOX2 regulated genes in Wounding from PMID: 30772301 | SOX2 |
| PLPPR2   | SOX2 regulated genes in Wounding from PMID: 30772301 | SOX2 |
| FAF1     | SOX2 regulated genes in Wounding from PMID: 30772301 | SOX2 |
| IFT20    | SOX2 regulated genes in Wounding from PMID: 30772301 | SOX2 |
| LAMC2    | SOX2 regulated genes in Wounding from PMID: 30772301 | SOX2 |
| ZNF7     | SOX2 regulated genes in Wounding from PMID: 30772301 | SOX2 |
| FOXP4    | SOX2 regulated genes in Wounding from PMID: 30772301 | SOX2 |
| RNF145   | SOX2 regulated genes in Wounding from PMID: 30772301 | SOX2 |
| ITPKB    | SOX2 regulated genes in Wounding from PMID: 30772301 | SOX2 |
| ACVR1B   | SOX2 regulated genes in Wounding from PMID: 30772301 | SOX2 |
| IGSF3    | SOX2 regulated genes in Wounding from PMID: 30772301 | SOX2 |
| PIK3R3   | SOX2 regulated genes in Wounding from PMID: 30772301 | SOX2 |
| CBX2     | SOX2 regulated genes in Wounding from PMID: 30772301 | SOX2 |
| USP7     | SOX2 regulated genes in Wounding from PMID: 30772301 | SOX2 |
| KMT5A    | SOX2 regulated genes in Wounding from PMID: 30772301 | SOX2 |
| MMADHC   | SOX2 regulated genes in Wounding from PMID: 30772301 | SOX2 |
| RRP15    | SOX2 regulated genes in Wounding from PMID: 30772301 | SOX2 |
| PRMT7    | SOX2 regulated genes in Wounding from PMID: 30772301 | SOX2 |
| TSR1     | SOX2 regulated genes in Wounding from PMID: 30772301 | SOX2 |
| HDAC1    | SOX2 regulated genes in Wounding from PMID: 30772301 | SOX2 |
| OTOP2    | SOX2 regulated genes in Wounding from PMID: 30772301 | SOX2 |
| EVPL     | SOX2 regulated genes in Wounding from PMID: 30772301 | SOX2 |
| IST1     | SOX2 regulated genes in Wounding from PMID: 30772301 | SOX2 |
| ATP2A2   | SOX2 regulated genes in Wounding from PMID: 30772301 | SOX2 |
| CITED4   | SOX2 regulated genes in Wounding from PMID: 30772301 | SOX2 |
| ERBB3    | SOX2 regulated genes in Wounding from PMID: 30772301 | SOX2 |
| CCDC92   | SOX2 regulated genes in Wounding from PMID: 30772301 | SOX2 |
| KIFC2    | SOX2 regulated genes in Wounding from PMID: 30772301 | SOX2 |
| ACTG1    | SOX2 regulated genes in Wounding from PMID: 30772301 | SOX2 |
| CFTR     | SOX2 regulated genes in Wounding from PMID: 30772301 | SOX2 |
| TRIM59   | SOX2 regulated genes in Wounding from PMID: 30772301 | SOX2 |
| AGBL5    | SOX2 regulated genes in Wounding from PMID: 30772301 | SOX2 |
| B4GALT3  | SOX2 regulated genes in Wounding from PMID: 30772301 | SOX2 |
| MAP4K4   | SOX2 regulated genes in Wounding from PMID: 30772301 | SOX2 |
| TMEM65   | SOX2 regulated genes in Wounding from PMID: 30772301 | SOX2 |
| RNF39    | SOX2 regulated genes in Wounding from PMID: 30772301 | SOX2 |
| C6orf141 | SOX2 regulated genes in Wounding from PMID: 30772301 | SOX2 |

|          |                                                      |      |
|----------|------------------------------------------------------|------|
| CTPS1    | SOX2 regulated genes in Wounding from PMID: 30772301 | SOX2 |
| ATP2C2   | SOX2 regulated genes in Wounding from PMID: 30772301 | SOX2 |
| ADGRL2   | SOX2 regulated genes in Wounding from PMID: 30772301 | SOX2 |
| WDR75    | SOX2 regulated genes in Wounding from PMID: 30772301 | SOX2 |
| LRP12    | SOX2 regulated genes in Wounding from PMID: 30772301 | SOX2 |
| TMEM120A | SOX2 regulated genes in Wounding from PMID: 30772301 | SOX2 |
| FER      | SOX2 regulated genes in Wounding from PMID: 30772301 | SOX2 |
| HSPA4    | SOX2 regulated genes in Wounding from PMID: 30772301 | SOX2 |
| PTPN9    | SOX2 regulated genes in Wounding from PMID: 30772301 | SOX2 |
| DVL3     | SOX2 regulated genes in Wounding from PMID: 30772301 | SOX2 |
| FZD5     | SOX2 regulated genes in Wounding from PMID: 30772301 | SOX2 |
| USP53    | SOX2 regulated genes in Wounding from PMID: 30772301 | SOX2 |
| CHD1     | SOX2 regulated genes in Wounding from PMID: 30772301 | SOX2 |
| KLF10    | SOX2 regulated genes in Wounding from PMID: 30772301 | SOX2 |
| IGSF8    | SOX2 regulated genes in Wounding from PMID: 30772301 | SOX2 |
| SYT8     | SOX2 regulated genes in Wounding from PMID: 30772301 | SOX2 |
| PTBP1    | SOX2 regulated genes in Wounding from PMID: 30772301 | SOX2 |
| WWC1     | SOX2 regulated genes in Wounding from PMID: 30772301 | SOX2 |
| PITHD1   | SOX2 regulated genes in Wounding from PMID: 30772301 | SOX2 |
| RBMXL1   | SOX2 regulated genes in Wounding from PMID: 30772301 | SOX2 |
| RASGEF1B | SOX2 regulated genes in Wounding from PMID: 30772301 | SOX2 |
| RNF25    | SOX2 regulated genes in Wounding from PMID: 30772301 | SOX2 |
| PADI3    | SOX2 regulated genes in Wounding from PMID: 30772301 | SOX2 |
| CSRP1    | SOX2 regulated genes in Wounding from PMID: 30772301 | SOX2 |
| AGRN     | SOX2 regulated genes in Wounding from PMID: 30772301 | SOX2 |
| TMEM229B | SOX2 regulated genes in Wounding from PMID: 30772301 | SOX2 |
| CHD4     | SOX2 regulated genes in Wounding from PMID: 30772301 | SOX2 |
| CYTH2    | SOX2 regulated genes in Wounding from PMID: 30772301 | SOX2 |
| SLC30A3  | SOX2 regulated genes in Wounding from PMID: 30772301 | SOX2 |
| EPHA4    | SOX2 regulated genes in Wounding from PMID: 30772301 | SOX2 |
| CRIP3    | SOX2 regulated genes in Wounding from PMID: 30772301 | SOX2 |
| ACTR1B   | SOX2 regulated genes in Wounding from PMID: 30772301 | SOX2 |
| LY6G6D   | SOX2 regulated genes in Wounding from PMID: 30772301 | SOX2 |
| NGF      | SOX2 regulated genes in Wounding from PMID: 30772301 | SOX2 |
| ZRANB2   | SOX2 regulated genes in Wounding from PMID: 30772301 | SOX2 |
| SSTR2    | SOX2 regulated genes in Wounding from PMID: 30772301 | SOX2 |
| GALE     | SOX2 regulated genes in Wounding from PMID: 30772301 | SOX2 |
| TMEM68   | SOX2 regulated genes in Wounding from PMID: 30772301 | SOX2 |
| GATA3    | SOX2 regulated genes in Wounding from PMID: 30772301 | SOX2 |
| SPTY2D1  | SOX2 regulated genes in Wounding from PMID: 30772301 | SOX2 |
| ZNF605   | SOX2 regulated genes in Wounding from PMID: 30772301 | SOX2 |
| PRPF40B  | SOX2 regulated genes in Wounding from PMID: 30772301 | SOX2 |
| KLHL29   | SOX2 regulated genes in Wounding from PMID: 30772301 | SOX2 |
| TUBA1A   | SOX2 regulated genes in Wounding from PMID: 30772301 | SOX2 |
| TAF7     | SOX2 regulated genes in Wounding from PMID: 30772301 | SOX2 |
| CEP83    | SOX2 regulated genes in Wounding from PMID: 30772301 | SOX2 |
| LLGL2    | SOX2 regulated genes in Wounding from PMID: 30772301 | SOX2 |
| KRT79    | SOX2 regulated genes in Wounding from PMID: 30772301 | SOX2 |
| MAP6     | SOX2 regulated genes in Wounding from PMID: 30772301 | SOX2 |
| PLK3     | SOX2 regulated genes in Wounding from PMID: 30772301 | SOX2 |
| ACSL3    | SOX2 regulated genes in Wounding from PMID: 30772301 | SOX2 |
| EGR2     | SOX2 regulated genes in Wounding from PMID: 30772301 | SOX2 |
| PALMD    | SOX2 regulated genes in Wounding from PMID: 30772301 | SOX2 |
| KIF21B   | SOX2 regulated genes in Wounding from PMID: 30772301 | SOX2 |
| TRNP1    | SOX2 regulated genes in Wounding from PMID: 30772301 | SOX2 |
| NUDCD1   | SOX2 regulated genes in Wounding from PMID: 30772301 | SOX2 |
| DYNC112  | SOX2 regulated genes in Wounding from PMID: 30772301 | SOX2 |
| ANGPTL4  | SOX2 regulated genes in Wounding from PMID: 30772301 | SOX2 |
| POLB     | SOX2 regulated genes in Wounding from PMID: 30772301 | SOX2 |



|          |                                                      |      |
|----------|------------------------------------------------------|------|
| TMEM139  | SOX2 regulated genes in Wounding from PMID: 30772301 | SOX2 |
| ABCC1    | SOX2 regulated genes in Wounding from PMID: 30772301 | SOX2 |
| KLHDC8A  | SOX2 regulated genes in Wounding from PMID: 30772301 | SOX2 |
| HMGCS2   | SOX2 regulated genes in Wounding from PMID: 30772301 | SOX2 |
| OTUD7B   | SOX2 regulated genes in Wounding from PMID: 30772301 | SOX2 |
| LINS1    | SOX2 regulated genes in Wounding from PMID: 30772301 | SOX2 |
| FLG2     | SOX2 regulated genes in Wounding from PMID: 30772301 | SOX2 |
| CCDC106  | SOX2 regulated genes in Wounding from PMID: 30772301 | SOX2 |
| ENC1     | SOX2 regulated genes in Wounding from PMID: 30772301 | SOX2 |
| TPPP3    | SOX2 regulated genes in Wounding from PMID: 30772301 | SOX2 |
| SYTL2    | SOX2 regulated genes in Wounding from PMID: 30772301 | SOX2 |
| HRAS     | SOX2 regulated genes in Wounding from PMID: 30772301 | SOX2 |
| CCT7     | SOX2 regulated genes in Wounding from PMID: 30772301 | SOX2 |
| BAHCC1   | SOX2 regulated genes in Wounding from PMID: 30772301 | SOX2 |
| TUFT1    | SOX2 regulated genes in Wounding from PMID: 30772301 | SOX2 |
| SHOC2    | SOX2 regulated genes in Wounding from PMID: 30772301 | SOX2 |
| ARL13B   | SOX2 regulated genes in Wounding from PMID: 30772301 | SOX2 |
| SLC4A9   | SOX2 regulated genes in Wounding from PMID: 30772301 | SOX2 |
| LYG2     | SOX2 regulated genes in Wounding from PMID: 30772301 | SOX2 |
| IRGQ     | SOX2 regulated genes in Wounding from PMID: 30772301 | SOX2 |
| FXYD3    | SOX2 regulated genes in Wounding from PMID: 30772301 | SOX2 |
| MIDN     | SOX2 regulated genes in Wounding from PMID: 30772301 | SOX2 |
| PTGS2    | SOX2 regulated genes in Wounding from PMID: 30772301 | SOX2 |
| FSTL3    | SOX2 regulated genes in Wounding from PMID: 30772301 | SOX2 |
| RNF223   | SOX2 regulated genes in Wounding from PMID: 30772301 | SOX2 |
| GTF2H2C  | SOX2 regulated genes in Wounding from PMID: 30772301 | SOX2 |
| BMPR1A   | SOX2 regulated genes in Wounding from PMID: 30772301 | SOX2 |
| SETD5    | SOX2 regulated genes in Wounding from PMID: 30772301 | SOX2 |
| S100A11  | SOX2 regulated genes in Wounding from PMID: 30772301 | SOX2 |
| NT5C3A   | SOX2 regulated genes in Wounding from PMID: 30772301 | SOX2 |
| RAB7B    | SOX2 regulated genes in Wounding from PMID: 30772301 | SOX2 |
| HOOK2    | SOX2 regulated genes in Wounding from PMID: 30772301 | SOX2 |
| TBC1D30  | SOX2 regulated genes in Wounding from PMID: 30772301 | SOX2 |
| ZBTB17   | SOX2 regulated genes in Wounding from PMID: 30772301 | SOX2 |
| ANGPT2   | SOX2 regulated genes in Wounding from PMID: 30772301 | SOX2 |
| EBNA1BP2 | SOX2 regulated genes in Wounding from PMID: 30772301 | SOX2 |
| CNOT2    | SOX2 regulated genes in Wounding from PMID: 30772301 | SOX2 |
| PLXNB1   | SOX2 regulated genes in Wounding from PMID: 30772301 | SOX2 |
| GALR2    | SOX2 regulated genes in Wounding from PMID: 30772301 | SOX2 |
| EIF3B    | SOX2 regulated genes in Wounding from PMID: 30772301 | SOX2 |
| MAGI1    | SOX2 regulated genes in Wounding from PMID: 30772301 | SOX2 |
| ANXA9    | SOX2 regulated genes in Wounding from PMID: 30772301 | SOX2 |
| SPRR4    | SOX2 regulated genes in Wounding from PMID: 30772301 | SOX2 |
| ERH      | SOX2 regulated genes in Wounding from PMID: 30772301 | SOX2 |
| HR       | SOX2 regulated genes in Wounding from PMID: 30772301 | SOX2 |
| CCNYL1   | SOX2 regulated genes in Wounding from PMID: 30772301 | SOX2 |
| FAM89A   | SOX2 regulated genes in Wounding from PMID: 30772301 | SOX2 |
| KRTAP4-6 | SOX2 regulated genes in Wounding from PMID: 30772301 | SOX2 |
| TCHH     | SOX2 regulated genes in Wounding from PMID: 30772301 | SOX2 |
| FAM221A  | SOX2 regulated genes in Wounding from PMID: 30772301 | SOX2 |
| ENPP1    | SOX2 regulated genes in Wounding from PMID: 30772301 | SOX2 |
| KPNB1    | SOX2 regulated genes in Wounding from PMID: 30772301 | SOX2 |
| MFF      | SOX2 regulated genes in Wounding from PMID: 30772301 | SOX2 |
| CDC42SE1 | SOX2 regulated genes in Wounding from PMID: 30772301 | SOX2 |
| ALYREF   | SOX2 regulated genes in Wounding from PMID: 30772301 | SOX2 |
| RND3     | SOX2 regulated genes in Wounding from PMID: 30772301 | SOX2 |
| TANC2    | SOX2 regulated genes in Wounding from PMID: 30772301 | SOX2 |
| HDLBP    | SOX2 regulated genes in Wounding from PMID: 30772301 | SOX2 |
| C17orf80 | SOX2 regulated genes in Wounding from PMID: 30772301 | SOX2 |

|           |                                                      |      |
|-----------|------------------------------------------------------|------|
| CAP1      | SOX2 regulated genes in Wounding from PMID: 30772301 | SOX2 |
| ATP6V0E1  | SOX2 regulated genes in Wounding from PMID: 30772301 | SOX2 |
| PGM1      | SOX2 regulated genes in Wounding from PMID: 30772301 | SOX2 |
| MAPRE3    | SOX2 regulated genes in Wounding from PMID: 30772301 | SOX2 |
| C3orf52   | SOX2 regulated genes in Wounding from PMID: 30772301 | SOX2 |
| TXNRD3    | SOX2 regulated genes in Wounding from PMID: 30772301 | SOX2 |
| WIZ       | SOX2 regulated genes in Wounding from PMID: 30772301 | SOX2 |
| YWHAE     | SOX2 regulated genes in Wounding from PMID: 30772301 | SOX2 |
| CUL2      | SOX2 regulated genes in Wounding from PMID: 30772301 | SOX2 |
| SMYD2     | SOX2 regulated genes in Wounding from PMID: 30772301 | SOX2 |
| TMEM181   | SOX2 regulated genes in Wounding from PMID: 30772301 | SOX2 |
| PDGFA     | SOX2 regulated genes in Wounding from PMID: 30772301 | SOX2 |
| CDH1      | SOX2 regulated genes in Wounding from PMID: 30772301 | SOX2 |
| E2F3      | SOX2 regulated genes in Wounding from PMID: 30772301 | SOX2 |
| SPECC1    | SOX2 regulated genes in Wounding from PMID: 30772301 | SOX2 |
| GMPPB     | SOX2 regulated genes in Wounding from PMID: 30772301 | SOX2 |
| TATDN2    | SOX2 regulated genes in Wounding from PMID: 30772301 | SOX2 |
| SEC22A    | SOX2 regulated genes in Wounding from PMID: 30772301 | SOX2 |
| PTGES3    | SOX2 regulated genes in Wounding from PMID: 30772301 | SOX2 |
| CCT3      | SOX2 regulated genes in Wounding from PMID: 30772301 | SOX2 |
| RAD23A    | SOX2 regulated genes in Wounding from PMID: 30772301 | SOX2 |
| LYPD6B    | SOX2 regulated genes in Wounding from PMID: 30772301 | SOX2 |
| DCLK3     | SOX2 regulated genes in Wounding from PMID: 30772301 | SOX2 |
| GPRC5A    | SOX2 regulated genes in Wounding from PMID: 30772301 | SOX2 |
| PIK3CB    | SOX2 regulated genes in Wounding from PMID: 30772301 | SOX2 |
| BEND5     | SOX2 regulated genes in Wounding from PMID: 30772301 | SOX2 |
| DPP9      | SOX2 regulated genes in Wounding from PMID: 30772301 | SOX2 |
| SLC23A3   | SOX2 regulated genes in Wounding from PMID: 30772301 | SOX2 |
| PAFAH1B3  | SOX2 regulated genes in Wounding from PMID: 30772301 | SOX2 |
| TRIM5     | SOX2 regulated genes in Wounding from PMID: 30772301 | SOX2 |
| PIP5K1A   | SOX2 regulated genes in Wounding from PMID: 30772301 | SOX2 |
| RECQL     | SOX2 regulated genes in Wounding from PMID: 30772301 | SOX2 |
| TNFRSF10B | SOX2 regulated genes in Wounding from PMID: 30772301 | SOX2 |
| TNFRSF10C | SOX2 regulated genes in Wounding from PMID: 30772301 | SOX2 |
| TNFRSF10D | SOX2 regulated genes in Wounding from PMID: 30772301 | SOX2 |
| YME1L1    | SOX2 regulated genes in Wounding from PMID: 30772301 | SOX2 |
| HBEGF     | SOX2 regulated genes in Wounding from PMID: 30772301 | SOX2 |
| RALGPS2   | SOX2 regulated genes in Wounding from PMID: 30772301 | SOX2 |
| PDCD4     | SOX2 regulated genes in Wounding from PMID: 30772301 | SOX2 |
| CNST      | SOX2 regulated genes in Wounding from PMID: 30772301 | SOX2 |
| HNRNPU    | SOX2 regulated genes in Wounding from PMID: 30772301 | SOX2 |
| ZNF746    | SOX2 regulated genes in Wounding from PMID: 30772301 | SOX2 |
| TMEM69    | SOX2 regulated genes in Wounding from PMID: 30772301 | SOX2 |
| WDR47     | SOX2 regulated genes in Wounding from PMID: 30772301 | SOX2 |
| TUBA4A    | SOX2 regulated genes in Wounding from PMID: 30772301 | SOX2 |
| SYNRG     | SOX2 regulated genes in Wounding from PMID: 30772301 | SOX2 |
| HECTD1    | SOX2 regulated genes in Wounding from PMID: 30772301 | SOX2 |
| FADS2     | SOX2 regulated genes in Wounding from PMID: 30772301 | SOX2 |
| QRICH2    | SOX2 regulated genes in Wounding from PMID: 30772301 | SOX2 |
| IWS1      | SOX2 regulated genes in Wounding from PMID: 30772301 | SOX2 |
| SAXO2     | SOX2 regulated genes in Wounding from PMID: 30772301 | SOX2 |
| IL11      | SOX2 regulated genes in Wounding from PMID: 30772301 | SOX2 |
| DVL1      | SOX2 regulated genes in Wounding from PMID: 30772301 | SOX2 |
| BHLHE41   | SOX2 regulated genes in Wounding from PMID: 30772301 | SOX2 |
| ATP6V0A2  | SOX2 regulated genes in Wounding from PMID: 30772301 | SOX2 |
| SPINT1    | SOX2 regulated genes in Wounding from PMID: 30772301 | SOX2 |
| GCLM      | SOX2 regulated genes in Wounding from PMID: 30772301 | SOX2 |
| CNTN5     | SOX2 regulated genes in Wounding from PMID: 30772301 | SOX2 |
| BZW2      | SOX2 regulated genes in Wounding from PMID: 30772301 | SOX2 |

|          |                                                      |      |
|----------|------------------------------------------------------|------|
| ST7L     | SOX2 regulated genes in Wounding from PMID: 30772301 | SOX2 |
| ENOPH1   | SOX2 regulated genes in Wounding from PMID: 30772301 | SOX2 |
| STX6     | SOX2 regulated genes in Wounding from PMID: 30772301 | SOX2 |
| FAT1     | SOX2 regulated genes in Wounding from PMID: 30772301 | SOX2 |
| SDR16C5  | SOX2 regulated genes in Wounding from PMID: 30772301 | SOX2 |
| ZNF266   | SOX2 regulated genes in Wounding from PMID: 30772301 | SOX2 |
| POLR2D   | SOX2 regulated genes in Wounding from PMID: 30772301 | SOX2 |
| CCDC91   | SOX2 regulated genes in Wounding from PMID: 30772301 | SOX2 |
| PDPN     | SOX2 regulated genes in Wounding from PMID: 30772301 | SOX2 |
| VANGL1   | SOX2 regulated genes in Wounding from PMID: 30772301 | SOX2 |
| KCNK12   | SOX2 regulated genes in Wounding from PMID: 30772301 | SOX2 |
| ITGA6    | SOX2 regulated genes in Wounding from PMID: 30772301 | SOX2 |
| GPR42    | SOX2 regulated genes in Wounding from PMID: 30772301 | SOX2 |
| FILIP1L  | SOX2 regulated genes in Wounding from PMID: 30772301 | SOX2 |
| NDUFAF7  | SOX2 regulated genes in Wounding from PMID: 30772301 | SOX2 |
| MPP7     | SOX2 regulated genes in Wounding from PMID: 30772301 | SOX2 |
| MYH14    | SOX2 regulated genes in Wounding from PMID: 30772301 | SOX2 |
| GTF2F1   | SOX2 regulated genes in Wounding from PMID: 30772301 | SOX2 |
| DHRS9    | SOX2 regulated genes in Wounding from PMID: 30772301 | SOX2 |
| MARK1    | SOX2 regulated genes in Wounding from PMID: 30772301 | SOX2 |
| C12orf56 | SOX2 regulated genes in Wounding from PMID: 30772301 | SOX2 |
| BNC1     | SOX2 regulated genes in Wounding from PMID: 30772301 | SOX2 |
| POGK     | SOX2 regulated genes in Wounding from PMID: 30772301 | SOX2 |
| P4HB     | SOX2 regulated genes in Wounding from PMID: 30772301 | SOX2 |
| B3GNT8   | SOX2 regulated genes in Wounding from PMID: 30772301 | SOX2 |
| METTL23  | SOX2 regulated genes in Wounding from PMID: 30772301 | SOX2 |
| TMED5    | SOX2 regulated genes in Wounding from PMID: 30772301 | SOX2 |
| SLC4A1   | SOX2 regulated genes in Wounding from PMID: 30772301 | SOX2 |
| PKP2     | SOX2 regulated genes in Wounding from PMID: 30772301 | SOX2 |
| GPSM2    | SOX2 regulated genes in Wounding from PMID: 30772301 | SOX2 |
| ITGB4    | SOX2 regulated genes in Wounding from PMID: 30772301 | SOX2 |
| CLASP1   | SOX2 regulated genes in Wounding from PMID: 30772301 | SOX2 |
| SIRT1    | SOX2 regulated genes in Wounding from PMID: 30772301 | SOX2 |
| CCHCR1   | SOX2 regulated genes in Wounding from PMID: 30772301 | SOX2 |
| TSG101   | SOX2 regulated genes in Wounding from PMID: 30772301 | SOX2 |
| MACF1    | SOX2 regulated genes in Wounding from PMID: 30772301 | SOX2 |
| TRAF4    | SOX2 regulated genes in Wounding from PMID: 30772301 | SOX2 |
| TXNRD1   | SOX2 regulated genes in Wounding from PMID: 30772301 | SOX2 |
| ARHGAP22 | SOX2 regulated genes in Wounding from PMID: 30772301 | SOX2 |
| INTS14   | SOX2 regulated genes in Wounding from PMID: 30772301 | SOX2 |
| CLK3     | SOX2 regulated genes in Wounding from PMID: 30772301 | SOX2 |
| EGR1     | SOX2 regulated genes in Wounding from PMID: 30772301 | SOX2 |
| ECD      | SOX2 regulated genes in Wounding from PMID: 30772301 | SOX2 |
| MYH15    | SOX2 regulated genes in Wounding from PMID: 30772301 | SOX2 |
| NSUN2    | SOX2 regulated genes in Wounding from PMID: 30772301 | SOX2 |
| GEMIN4   | SOX2 regulated genes in Wounding from PMID: 30772301 | SOX2 |
| LAD1     | SOX2 regulated genes in Wounding from PMID: 30772301 | SOX2 |
| RBBP6    | SOX2 regulated genes in Wounding from PMID: 30772301 | SOX2 |
| ATXN7L3  | SOX2 regulated genes in Wounding from PMID: 30772301 | SOX2 |
| PPP2CB   | SOX2 regulated genes in Wounding from PMID: 30772301 | SOX2 |
| SPPL3    | SOX2 regulated genes in Wounding from PMID: 30772301 | SOX2 |
| SNAPC3   | SOX2 regulated genes in Wounding from PMID: 30772301 | SOX2 |
| FBXO46   | SOX2 regulated genes in Wounding from PMID: 30772301 | SOX2 |
| PDXDC1   | SOX2 regulated genes in Wounding from PMID: 30772301 | SOX2 |
| HGS      | SOX2 regulated genes in Wounding from PMID: 30772301 | SOX2 |
| STEAP1   | SOX2 regulated genes in Wounding from PMID: 30772301 | SOX2 |
| KCTD5    | SOX2 regulated genes in Wounding from PMID: 30772301 | SOX2 |
| PRSS22   | SOX2 regulated genes in Wounding from PMID: 30772301 | SOX2 |
| PLXNA1   | SOX2 regulated genes in Wounding from PMID: 30772301 | SOX2 |

|          |                                                      |      |
|----------|------------------------------------------------------|------|
| STRIP1   | SOX2 regulated genes in Wounding from PMID: 30772301 | SOX2 |
| DLG1     | SOX2 regulated genes in Wounding from PMID: 30772301 | SOX2 |
| TP63     | SOX2 regulated genes in Wounding from PMID: 30772301 | SOX2 |
| USP43    | SOX2 regulated genes in Wounding from PMID: 30772301 | SOX2 |
| MGST3    | SOX2 regulated genes in Wounding from PMID: 30772301 | SOX2 |
| ANKRD13B | SOX2 regulated genes in Wounding from PMID: 30772301 | SOX2 |
| MPZL1    | SOX2 regulated genes in Wounding from PMID: 30772301 | SOX2 |
| SMURF2   | SOX2 regulated genes in Wounding from PMID: 30772301 | SOX2 |
| PRPF3    | SOX2 regulated genes in Wounding from PMID: 30772301 | SOX2 |
| RBM45    | SOX2 regulated genes in Wounding from PMID: 30772301 | SOX2 |
| SLC30A1  | SOX2 regulated genes in Wounding from PMID: 30772301 | SOX2 |
| SHH      | SOX2 regulated genes in Wounding from PMID: 30772301 | SOX2 |
| SLC7A8   | SOX2 regulated genes in Wounding from PMID: 30772301 | SOX2 |
| PHACTR1  | SOX2 regulated genes in Wounding from PMID: 30772301 | SOX2 |
| BPNT1    | SOX2 regulated genes in Wounding from PMID: 30772301 | SOX2 |
| PCDHGB1  | SOX2 regulated genes in Wounding from PMID: 30772301 | SOX2 |
| PSMD7    | SOX2 regulated genes in Wounding from PMID: 30772301 | SOX2 |
| PELI1    | SOX2 regulated genes in Wounding from PMID: 30772301 | SOX2 |
| ZNF800   | SOX2 regulated genes in Wounding from PMID: 30772301 | SOX2 |
| FCAMR    | SOX2 regulated genes in Wounding from PMID: 30772301 | SOX2 |
| DDX1     | SOX2 regulated genes in Wounding from PMID: 30772301 | SOX2 |
| PPIP5K1  | SOX2 regulated genes in Wounding from PMID: 30772301 | SOX2 |
| RHOA     | SOX2 regulated genes in Wounding from PMID: 30772301 | SOX2 |
| UBA5     | SOX2 regulated genes in Wounding from PMID: 30772301 | SOX2 |
| LRRFIP1  | SOX2 regulated genes in Wounding from PMID: 30772301 | SOX2 |
| NIPAL4   | SOX2 regulated genes in Wounding from PMID: 30772301 | SOX2 |
| PKD1     | SOX2 regulated genes in Wounding from PMID: 30772301 | SOX2 |
| TMEM40   | SOX2 regulated genes in Wounding from PMID: 30772301 | SOX2 |
| NME6     | SOX2 regulated genes in Wounding from PMID: 30772301 | SOX2 |
| SLC27A6  | SOX2 regulated genes in Wounding from PMID: 30772301 | SOX2 |
| PGAP1    | SOX2 regulated genes in Wounding from PMID: 30772301 | SOX2 |
| KCTD11   | SOX2 regulated genes in Wounding from PMID: 30772301 | SOX2 |
| POMGNT1  | SOX2 regulated genes in Wounding from PMID: 30772301 | SOX2 |
| PRMT1    | SOX2 regulated genes in Wounding from PMID: 30772301 | SOX2 |
| PDLIM4   | SOX2 regulated genes in Wounding from PMID: 30772301 | SOX2 |
| CHMP4C   | SOX2 regulated genes in Wounding from PMID: 30772301 | SOX2 |
| SLC44A2  | SOX2 regulated genes in Wounding from PMID: 30772301 | SOX2 |
| LUZP1    | SOX2 regulated genes in Wounding from PMID: 30772301 | SOX2 |
| TWF1     | SOX2 regulated genes in Wounding from PMID: 30772301 | SOX2 |
| CTSE     | SOX2 regulated genes in Wounding from PMID: 30772301 | SOX2 |
| CDC42BPA | SOX2 regulated genes in Wounding from PMID: 30772301 | SOX2 |
| SSR2     | SOX2 regulated genes in Wounding from PMID: 30772301 | SOX2 |
| LIMA1    | SOX2 regulated genes in Wounding from PMID: 30772301 | SOX2 |
| EFNA4    | SOX2 regulated genes in Wounding from PMID: 30772301 | SOX2 |
| GUCY2C   | SOX2 regulated genes in Wounding from PMID: 30772301 | SOX2 |
| ATP1B1   | SOX2 regulated genes in Wounding from PMID: 30772301 | SOX2 |
| EFNA1    | SOX2 regulated genes in Wounding from PMID: 30772301 | SOX2 |
| GTF2IRD1 | SOX2 regulated genes in Wounding from PMID: 30772301 | SOX2 |
| PSME3    | SOX2 regulated genes in Wounding from PMID: 30772301 | SOX2 |
| MKRN2OS  | SOX2 regulated genes in Wounding from PMID: 30772301 | SOX2 |
| B3GNT5   | SOX2 regulated genes in Wounding from PMID: 30772301 | SOX2 |
| CNTN2    | SOX2 regulated genes in Wounding from PMID: 30772301 | SOX2 |
| KLC3     | SOX2 regulated genes in Wounding from PMID: 30772301 | SOX2 |
| HIP1R    | SOX2 regulated genes in Wounding from PMID: 30772301 | SOX2 |
| EFNA5    | SOX2 regulated genes in Wounding from PMID: 30772301 | SOX2 |
| DAZAP1   | SOX2 regulated genes in Wounding from PMID: 30772301 | SOX2 |
| PRKAR1A  | SOX2 regulated genes in Wounding from PMID: 30772301 | SOX2 |
| NAV2     | SOX2 regulated genes in Wounding from PMID: 30772301 | SOX2 |
| RANBP10  | SOX2 regulated genes in Wounding from PMID: 30772301 | SOX2 |

|         |                                                      |      |
|---------|------------------------------------------------------|------|
| PFN2    | SOX2 regulated genes in Wounding from PMID: 30772301 | SOX2 |
| SNX16   | SOX2 regulated genes in Wounding from PMID: 30772301 | SOX2 |
| NME1    | SOX2 regulated genes in Wounding from PMID: 30772301 | SOX2 |
| FYTTD1  | SOX2 regulated genes in Wounding from PMID: 30772301 | SOX2 |
| BEAN1   | SOX2 regulated genes in Wounding from PMID: 30772301 | SOX2 |
| SORT1   | SOX2 regulated genes in Wounding from PMID: 30772301 | SOX2 |
| NCMAP   | SOX2 regulated genes in Wounding from PMID: 30772301 | SOX2 |
| LTBP3   | SOX2 regulated genes in Wounding from PMID: 30772301 | SOX2 |
| B3GNT2  | SOX2 regulated genes in Wounding from PMID: 30772301 | SOX2 |
| CCDC124 | SOX2 regulated genes in Wounding from PMID: 30772301 | SOX2 |
| CLDN4   | SOX2 regulated genes in Wounding from PMID: 30772301 | SOX2 |
| SHF     | SOX2 regulated genes in Wounding from PMID: 30772301 | SOX2 |
| RPL29   | SOX2 regulated genes in Wounding from PMID: 30772301 | SOX2 |
| COQ10B  | SOX2 regulated genes in Wounding from PMID: 30772301 | SOX2 |
| FAM187B | SOX2 regulated genes in Wounding from PMID: 30772301 | SOX2 |
| PSMD8   | SOX2 regulated genes in Wounding from PMID: 30772301 | SOX2 |
| GATAD2A | SOX2 regulated genes in Wounding from PMID: 30772301 | SOX2 |
| TUBB3   | SOX2 regulated genes in Wounding from PMID: 30772301 | SOX2 |
| BZW1    | SOX2 regulated genes in Wounding from PMID: 30772301 | SOX2 |
| KDM5B   | SOX2 regulated genes in Wounding from PMID: 30772301 | SOX2 |
| TMEM222 | SOX2 regulated genes in Wounding from PMID: 30772301 | SOX2 |
| HAUS8   | SOX2 regulated genes in Wounding from PMID: 30772301 | SOX2 |
| IL20    | SOX2 regulated genes in Wounding from PMID: 30772301 | SOX2 |
| TIGD5   | SOX2 regulated genes in Wounding from PMID: 30772301 | SOX2 |
| FBXO28  | SOX2 regulated genes in Wounding from PMID: 30772301 | SOX2 |
| VSIG8   | SOX2 regulated genes in Wounding from PMID: 30772301 | SOX2 |
| FBXO38  | SOX2 regulated genes in Wounding from PMID: 30772301 | SOX2 |
| CSNK1D  | SOX2 regulated genes in Wounding from PMID: 30772301 | SOX2 |
| FOXN1   | SOX2 regulated genes in Wounding from PMID: 30772301 | SOX2 |
| WNT3A   | SOX2 regulated genes in Wounding from PMID: 30772301 | SOX2 |
| EAF1    | SOX2 regulated genes in Wounding from PMID: 30772301 | SOX2 |
| TOP2B   | SOX2 regulated genes in Wounding from PMID: 30772301 | SOX2 |
| NGEF    | SOX2 regulated genes in Wounding from PMID: 30772301 | SOX2 |
| LRRC59  | SOX2 regulated genes in Wounding from PMID: 30772301 | SOX2 |
| TTC13   | SOX2 regulated genes in Wounding from PMID: 30772301 | SOX2 |
| WDR77   | SOX2 regulated genes in Wounding from PMID: 30772301 | SOX2 |
| S100A3  | SOX2 regulated genes in Wounding from PMID: 30772301 | SOX2 |
| GNAI3   | SOX2 regulated genes in Wounding from PMID: 30772301 | SOX2 |
| KRT27   | SOX2 regulated genes in Wounding from PMID: 30772301 | SOX2 |
| DIS3L   | SOX2 regulated genes in Wounding from PMID: 30772301 | SOX2 |
| GAB1    | SOX2 regulated genes in Wounding from PMID: 30772301 | SOX2 |
| DDX5    | SOX2 regulated genes in Wounding from PMID: 30772301 | SOX2 |
| UBTF    | SOX2 regulated genes in Wounding from PMID: 30772301 | SOX2 |
| TXLNA   | SOX2 regulated genes in Wounding from PMID: 30772301 | SOX2 |
| MEMO1   | SOX2 regulated genes in Wounding from PMID: 30772301 | SOX2 |
| CRABP2  | SOX2 regulated genes in Wounding from PMID: 30772301 | SOX2 |
| DEDD2   | SOX2 regulated genes in Wounding from PMID: 30772301 | SOX2 |
| TPRG1   | SOX2 regulated genes in Wounding from PMID: 30772301 | SOX2 |
| MYO6    | SOX2 regulated genes in Wounding from PMID: 30772301 | SOX2 |
| HOOK1   | SOX2 regulated genes in Wounding from PMID: 30772301 | SOX2 |
| SEMA6A  | SOX2 regulated genes in Wounding from PMID: 30772301 | SOX2 |
| TEPP    | SOX2 regulated genes in Wounding from PMID: 30772301 | SOX2 |
| SMAD3   | SOX2 regulated genes in Wounding from PMID: 30772301 | SOX2 |
| REEP5   | SOX2 regulated genes in Wounding from PMID: 30772301 | SOX2 |
| C1QL1   | SOX2 regulated genes in Wounding from PMID: 30772301 | SOX2 |
| ECE1    | SOX2 regulated genes in Wounding from PMID: 30772301 | SOX2 |
| HINFP   | SOX2 regulated genes in Wounding from PMID: 30772301 | SOX2 |
| KRT18   | SOX2 regulated genes in Wounding from PMID: 30772301 | SOX2 |
| ARF6    | SOX2 regulated genes in Wounding from PMID: 30772301 | SOX2 |

|          |                                                      |      |
|----------|------------------------------------------------------|------|
| GSK3B    | SOX2 regulated genes in Wounding from PMID: 30772301 | SOX2 |
| DUSP10   | SOX2 regulated genes in Wounding from PMID: 30772301 | SOX2 |
| SEC61A1  | SOX2 regulated genes in Wounding from PMID: 30772301 | SOX2 |
| FBXW11   | SOX2 regulated genes in Wounding from PMID: 30772301 | SOX2 |
| SF3B4    | SOX2 regulated genes in Wounding from PMID: 30772301 | SOX2 |
| ATP2C1   | SOX2 regulated genes in Wounding from PMID: 30772301 | SOX2 |
| KRT36    | SOX2 regulated genes in Wounding from PMID: 30772301 | SOX2 |
| HEYL     | SOX2 regulated genes in Wounding from PMID: 30772301 | SOX2 |
| PHC2     | SOX2 regulated genes in Wounding from PMID: 30772301 | SOX2 |
| UBE2I    | SOX2 regulated genes in Wounding from PMID: 30772301 | SOX2 |
| KCNH1    | SOX2 regulated genes in Wounding from PMID: 30772301 | SOX2 |
| PPP1R13L | SOX2 regulated genes in Wounding from PMID: 30772301 | SOX2 |
| PPM1D    | SOX2 regulated genes in Wounding from PMID: 30772301 | SOX2 |
| ACP5     | SOX2 regulated genes in Wounding from PMID: 30772301 | SOX2 |
| MRGPRX3  | SOX2 regulated genes in Wounding from PMID: 30772301 | SOX2 |
| CHMP2B   | SOX2 regulated genes in Wounding from PMID: 30772301 | SOX2 |
| PIWIL2   | SOX2 regulated genes in Wounding from PMID: 30772301 | SOX2 |
| ATP11B   | SOX2 regulated genes in Wounding from PMID: 30772301 | SOX2 |
| CFAP57   | SOX2 regulated genes in Wounding from PMID: 30772301 | SOX2 |
| EIF5A    | SOX2 regulated genes in Wounding from PMID: 30772301 | SOX2 |
| TFG      | SOX2 regulated genes in Wounding from PMID: 30772301 | SOX2 |
| RAB34    | SOX2 regulated genes in Wounding from PMID: 30772301 | SOX2 |
| ATOH7    | SOX2 regulated genes in Wounding from PMID: 30772301 | SOX2 |
| KLK7     | SOX2 regulated genes in Wounding from PMID: 30772301 | SOX2 |
| PLEKHG6  | SOX2 regulated genes in Wounding from PMID: 30772301 | SOX2 |
| ARAP2    | SOX2 regulated genes in Wounding from PMID: 30772301 | SOX2 |
| PIAS4    | SOX2 regulated genes in Wounding from PMID: 30772301 | SOX2 |
| ABCB11   | SOX2 regulated genes in Wounding from PMID: 30772301 | SOX2 |
| CLDN1    | SOX2 regulated genes in Wounding from PMID: 30772301 | SOX2 |
| LAMB3    | SOX2 regulated genes in Wounding from PMID: 30772301 | SOX2 |
| HAS1     | SOX2 regulated genes in Wounding from PMID: 30772301 | SOX2 |
| VTCN1    | SOX2 regulated genes in Wounding from PMID: 30772301 | SOX2 |
| UBE2F    | SOX2 regulated genes in Wounding from PMID: 30772301 | SOX2 |
| MUC1     | SOX2 regulated genes in Wounding from PMID: 30772301 | SOX2 |
| TSC22D2  | SOX2 regulated genes in Wounding from PMID: 30772301 | SOX2 |
| ACTL6A   | SOX2 regulated genes in Wounding from PMID: 30772301 | SOX2 |
| TNRC18   | SOX2 regulated genes in Wounding from PMID: 30772301 | SOX2 |
| DCAKD    | SOX2 regulated genes in Wounding from PMID: 30772301 | SOX2 |
| LPAR3    | SOX2 regulated genes in Wounding from PMID: 30772301 | SOX2 |
| NIF3L1   | SOX2 regulated genes in Wounding from PMID: 30772301 | SOX2 |
| TAF13    | SOX2 regulated genes in Wounding from PMID: 30772301 | SOX2 |
| PCDH1    | SOX2 regulated genes in Wounding from PMID: 30772301 | SOX2 |
| RTN4     | SOX2 regulated genes in Wounding from PMID: 30772301 | SOX2 |
| ZPR1     | SOX2 regulated genes in Wounding from PMID: 30772301 | SOX2 |
| E2F2     | SOX2 regulated genes in Wounding from PMID: 30772301 | SOX2 |
| GRAMD1C  | SOX2 regulated genes in Wounding from PMID: 30772301 | SOX2 |
| GCNT2    | SOX2 regulated genes in Wounding from PMID: 30772301 | SOX2 |
| RGMA     | SOX2 regulated genes in Wounding from PMID: 30772301 | SOX2 |
| MXD1     | SOX2 regulated genes in Wounding from PMID: 30772301 | SOX2 |
| MEX3A    | SOX2 regulated genes in Wounding from PMID: 30772301 | SOX2 |
| DYRK3    | SOX2 regulated genes in Wounding from PMID: 30772301 | SOX2 |
| RNF11    | SOX2 regulated genes in Wounding from PMID: 30772301 | SOX2 |
| USP2     | SOX2 regulated genes in Wounding from PMID: 30772301 | SOX2 |
| FSCN2    | SOX2 regulated genes in Wounding from PMID: 30772301 | SOX2 |
| PGBD1    | SOX2 regulated genes in Wounding from PMID: 30772301 | SOX2 |
| IFNLR1   | SOX2 regulated genes in Wounding from PMID: 30772301 | SOX2 |
| EMP2     | SOX2 regulated genes in Wounding from PMID: 30772301 | SOX2 |
| ACOT7    | SOX2 regulated genes in Wounding from PMID: 30772301 | SOX2 |
| NTF4     | SOX2 regulated genes in Wounding from PMID: 30772301 | SOX2 |

|          |                                                                         |      |
|----------|-------------------------------------------------------------------------|------|
| SLCO2A1  | SOX2 regulated genes in Wounding from PMID: 30772301                    | SOX2 |
| TSPAN1   | SOX2 regulated genes in Wounding from PMID: 30772301                    | SOX2 |
| HNRNPF   | SOX2 regulated genes in Wounding from PMID: 30772301                    | SOX2 |
| MYO1B    | SOX2 regulated genes in Wounding from PMID: 30772301                    | SOX2 |
| DHX29    | SOX2 regulated genes in Wounding from PMID: 30772301                    | SOX2 |
| HOMER3   | SOX2 regulated genes in Wounding from PMID: 30772301                    | SOX2 |
| RIMS1    | SOX2 regulated genes in Wounding from PMID: 30772301                    | SOX2 |
| F11R     | SOX2 regulated genes in Wounding from PMID: 30772301                    | SOX2 |
| PHYHIP   | SOX2 regulated genes in Wounding from PMID: 30772301                    | SOX2 |
| ERC1     | SOX2 regulated genes in Wounding from PMID: 30772301                    | SOX2 |
| SLC45A3  | SOX2 regulated genes in Wounding from PMID: 30772301                    | SOX2 |
| GPR12    | SOX2 regulated genes in Keratinocyte Overexpression from PMID: 30772301 | SOX2 |
| ZNF512B  | SOX2 regulated genes in Keratinocyte Overexpression from PMID: 30772301 | SOX2 |
| PWP2     | SOX2 regulated genes in Keratinocyte Overexpression from PMID: 30772301 | SOX2 |
| RAB27B   | SOX2 regulated genes in Keratinocyte Overexpression from PMID: 30772301 | SOX2 |
| MZT1     | SOX2 regulated genes in Keratinocyte Overexpression from PMID: 30772301 | SOX2 |
| SYN3     | SOX2 regulated genes in Keratinocyte Overexpression from PMID: 30772301 | SOX2 |
| USP12    | SOX2 regulated genes in Keratinocyte Overexpression from PMID: 30772301 | SOX2 |
| ARL5B    | SOX2 regulated genes in Keratinocyte Overexpression from PMID: 30772301 | SOX2 |
| PCGF3    | SOX2 regulated genes in Keratinocyte Overexpression from PMID: 30772301 | SOX2 |
| HORMAD2  | SOX2 regulated genes in Keratinocyte Overexpression from PMID: 30772301 | SOX2 |
| LIPG     | SOX2 regulated genes in Keratinocyte Overexpression from PMID: 30772301 | SOX2 |
| YES1     | SOX2 regulated genes in Keratinocyte Overexpression from PMID: 30772301 | SOX2 |
| UNC79    | SOX2 regulated genes in Keratinocyte Overexpression from PMID: 30772301 | SOX2 |
| ZBTB21   | SOX2 regulated genes in Keratinocyte Overexpression from PMID: 30772301 | SOX2 |
| GTPBP6   | SOX2 regulated genes in Keratinocyte Overexpression from PMID: 30772301 | SOX2 |
| CPLX1    | SOX2 regulated genes in Keratinocyte Overexpression from PMID: 30772301 | SOX2 |
| ATG2B    | SOX2 regulated genes in Keratinocyte Overexpression from PMID: 30772301 | SOX2 |
| SMOX     | SOX2 regulated genes in Keratinocyte Overexpression from PMID: 30772301 | SOX2 |
| CLDN17   | SOX2 regulated genes in Keratinocyte Overexpression from PMID: 30772301 | SOX2 |
| DCAF4    | SOX2 regulated genes in Keratinocyte Overexpression from PMID: 30772301 | SOX2 |
| MOCOS    | SOX2 regulated genes in Keratinocyte Overexpression from PMID: 30772301 | SOX2 |
| PBDC1    | SOX2 regulated genes in Keratinocyte Overexpression from PMID: 30772301 | SOX2 |
| PRELID3B | SOX2 regulated genes in Keratinocyte Overexpression from PMID: 30772301 | SOX2 |
| MEX3C    | SOX2 regulated genes in Keratinocyte Overexpression from PMID: 30772301 | SOX2 |
| EVA1C    | SOX2 regulated genes in Keratinocyte Overexpression from PMID: 30772301 | SOX2 |
| PSMA7    | SOX2 regulated genes in Keratinocyte Overexpression from PMID: 30772301 | SOX2 |
| NUDT5    | SOX2 regulated genes in Keratinocyte Overexpression from PMID: 30772301 | SOX2 |
| VBP1     | SOX2 regulated genes in Keratinocyte Overexpression from PMID: 30772301 | SOX2 |
| SLC25A43 | SOX2 regulated genes in Keratinocyte Overexpression from PMID: 30772301 | SOX2 |
| TTLL1    | SOX2 regulated genes in Keratinocyte Overexpression from PMID: 30772301 | SOX2 |
| SIM2     | SOX2 regulated genes in Keratinocyte Overexpression from PMID: 30772301 | SOX2 |
| RRP1B    | SOX2 regulated genes in Keratinocyte Overexpression from PMID: 30772301 | SOX2 |
| CEP76    | SOX2 regulated genes in Keratinocyte Overexpression from PMID: 30772301 | SOX2 |
| PCNX4    | SOX2 regulated genes in Keratinocyte Overexpression from PMID: 30772301 | SOX2 |
| ZFP64    | SOX2 regulated genes in Keratinocyte Overexpression from PMID: 30772301 | SOX2 |
| TAF4B    | SOX2 regulated genes in Keratinocyte Overexpression from PMID: 30772301 | SOX2 |
| SKA1     | SOX2 regulated genes in Keratinocyte Overexpression from PMID: 30772301 | SOX2 |
| PROSER1  | SOX2 regulated genes in Keratinocyte Overexpression from PMID: 30772301 | SOX2 |
| TTC6     | SOX2 regulated genes in Keratinocyte Overexpression from PMID: 30772301 | SOX2 |
| NFX1     | SOX2 regulated genes in Keratinocyte Overexpression from PMID: 30772301 | SOX2 |
| POMP     | SOX2 regulated genes in Keratinocyte Overexpression from PMID: 30772301 | SOX2 |
| SCAF4    | SOX2 regulated genes in Keratinocyte Overexpression from PMID: 30772301 | SOX2 |
| LINGO2   | SOX2 regulated genes in Keratinocyte Overexpression from PMID: 30772301 | SOX2 |
| PPP6R2   | SOX2 regulated genes in Keratinocyte Overexpression from PMID: 30772301 | SOX2 |
| SEC23B   | SOX2 regulated genes in Keratinocyte Overexpression from PMID: 30772301 | SOX2 |
| RALY     | SOX2 regulated genes in Keratinocyte Overexpression from PMID: 30772301 | SOX2 |
| PDE9A    | SOX2 regulated genes in Keratinocyte Overexpression from PMID: 30772301 | SOX2 |
| HAUS6    | SOX2 regulated genes in Keratinocyte Overexpression from PMID: 30772301 | SOX2 |







|              |                                                                         |      |
|--------------|-------------------------------------------------------------------------|------|
| PSMG2        | SOX2 regulated genes in Keratinocyte Overexpression from PMID: 30772301 | SOX2 |
| ADRM1        | SOX2 regulated genes in Keratinocyte Overexpression from PMID: 30772301 | SOX2 |
| MIPEP        | SOX2 regulated genes in Keratinocyte Overexpression from PMID: 30772301 | SOX2 |
| GTSE1        | SOX2 regulated genes in Keratinocyte Overexpression from PMID: 30772301 | SOX2 |
| SLC37A1      | SOX2 regulated genes in Keratinocyte Overexpression from PMID: 30772301 | SOX2 |
| TGIF1        | SOX2 regulated genes in Keratinocyte Overexpression from PMID: 30772301 | SOX2 |
| RNF17        | SOX2 regulated genes in Keratinocyte Overexpression from PMID: 30772301 | SOX2 |
| CENPC        | SOX2 regulated genes in Keratinocyte Overexpression from PMID: 30772301 | SOX2 |
| PSMC6        | SOX2 regulated genes in Keratinocyte Overexpression from PMID: 30772301 | SOX2 |
| AHCY         | SOX2 regulated genes in Keratinocyte Overexpression from PMID: 30772301 | SOX2 |
| MYO5B        | SOX2 regulated genes in Keratinocyte Overexpression from PMID: 30772301 | SOX2 |
| NPC1         | SOX2 regulated genes in Keratinocyte Overexpression from PMID: 30772301 | SOX2 |
| GRPEL1       | SOX2 regulated genes in Keratinocyte Overexpression from PMID: 30772301 | SOX2 |
| PDXP         | SOX2 regulated genes in Keratinocyte Overexpression from PMID: 30772301 | SOX2 |
| RNGTT        | SOX2 regulated genes in Keratinocyte Overexpression from PMID: 30772301 | SOX2 |
| ESF1         | SOX2 regulated genes in Keratinocyte Overexpression from PMID: 30772301 | SOX2 |
| QRFPR        | SOX2 regulated genes in Keratinocyte Overexpression from PMID: 30772301 | SOX2 |
| THTPA        | SOX2 regulated genes in Keratinocyte Overexpression from PMID: 30772301 | SOX2 |
| NKX1-2       | SOX2 regulated genes in Keratinocyte Overexpression from PMID: 30772301 | SOX2 |
| C14orf93     | SOX2 regulated genes in Keratinocyte Overexpression from PMID: 30772301 | SOX2 |
| MYO1D        | SOX2 regulated genes in Keratinocyte Overexpression from PMID: 30772301 | SOX2 |
| LASP1        | SOX2 regulated genes in Keratinocyte Overexpression from PMID: 30772301 | SOX2 |
| DLGAP4       | SOX2 regulated genes in Keratinocyte Overexpression from PMID: 30772301 | SOX2 |
| BCOR         | SOX2 regulated genes in Keratinocyte Overexpression from PMID: 30772301 | SOX2 |
| CYP17A1      | SOX2 regulated genes in Keratinocyte Overexpression from PMID: 30772301 | SOX2 |
| FAM234B      | SOX2 regulated genes in Keratinocyte Overexpression from PMID: 30772301 | SOX2 |
| GPAT3        | SOX2 regulated genes in Keratinocyte Overexpression from PMID: 30772301 | SOX2 |
| TNKS2        | SOX2 regulated genes in Keratinocyte Overexpression from PMID: 30772301 | SOX2 |
| EFCAB11      | SOX2 regulated genes in Keratinocyte Overexpression from PMID: 30772301 | SOX2 |
| GPATCH8      | SOX2 regulated genes in Keratinocyte Overexpression from PMID: 30772301 | SOX2 |
| SUPT16H      | SOX2 regulated genes in Keratinocyte Overexpression from PMID: 30772301 | SOX2 |
| ZNF407       | SOX2 regulated genes in Keratinocyte Overexpression from PMID: 30772301 | SOX2 |
| ATP5MF-PTCD1 | SOX2 regulated genes in Keratinocyte Overexpression from PMID: 30772301 | SOX2 |
| TEX30        | SOX2 regulated genes in Keratinocyte Overexpression from PMID: 30772301 | SOX2 |
| GRIA3        | SOX2 regulated genes in Keratinocyte Overexpression from PMID: 30772301 | SOX2 |
| COPS4        | SOX2 regulated genes in Keratinocyte Overexpression from PMID: 30772301 | SOX2 |
| TSSK4        | SOX2 regulated genes in Keratinocyte Overexpression from PMID: 30772301 | SOX2 |
| INCENP       | SOX2 regulated genes in Keratinocyte Overexpression from PMID: 30772301 | SOX2 |
| LZTS1        | SOX2 regulated genes in Keratinocyte Overexpression from PMID: 30772301 | SOX2 |
| SETBP1       | SOX2 regulated genes in Keratinocyte Overexpression from PMID: 30772301 | SOX2 |
| RPL36A       | SOX2 regulated genes in Keratinocyte Overexpression from PMID: 30772301 | SOX2 |
| PLPP2        | SOX2 regulated genes in Keratinocyte Overexpression from PMID: 30772301 | SOX2 |
| NF2          | SOX2 regulated genes in Keratinocyte Overexpression from PMID: 30772301 | SOX2 |
| C18orf32     | SOX2 regulated genes in Keratinocyte Overexpression from PMID: 30772301 | SOX2 |
| ABTB2        | SOX2 regulated genes in Keratinocyte Overexpression from PMID: 30772301 | SOX2 |
| SERPINB13    | SOX2 regulated genes in Keratinocyte Overexpression from PMID: 30772301 | SOX2 |
| MAP3K7       | SOX2 regulated genes in Keratinocyte Overexpression from PMID: 30772301 | SOX2 |
| FRAT1        | SOX2 regulated genes in Keratinocyte Overexpression from PMID: 30772301 | SOX2 |
| RNF167       | SOX2 regulated genes in Keratinocyte Overexpression from PMID: 30772301 | SOX2 |
| TSPAN7       | SOX2 regulated genes in Keratinocyte Overexpression from PMID: 30772301 | SOX2 |
| GUCD1        | SOX2 regulated genes in Keratinocyte Overexpression from PMID: 30772301 | SOX2 |
| GSTCD        | SOX2 regulated genes in Keratinocyte Overexpression from PMID: 30772301 | SOX2 |
| ZBTB43       | SOX2 regulated genes in Keratinocyte Overexpression from PMID: 30772301 | SOX2 |
| PPP2R2A      | SOX2 regulated genes in Keratinocyte Overexpression from PMID: 30772301 | SOX2 |
| NUDCD3       | SOX2 regulated genes in Keratinocyte Overexpression from PMID: 30772301 | SOX2 |
| SERPINB11    | SOX2 regulated genes in Keratinocyte Overexpression from PMID: 30772301 | SOX2 |
| SRXN1        | SOX2 regulated genes in Keratinocyte Overexpression from PMID: 30772301 | SOX2 |
| LDLRAD3      | SOX2 regulated genes in Keratinocyte Overexpression from PMID: 30772301 | SOX2 |
| NRBF2        | SOX2 regulated genes in Keratinocyte Overexpression from PMID: 30772301 | SOX2 |





|          |                                                                         |      |
|----------|-------------------------------------------------------------------------|------|
| FKBP4    | SOX2 regulated genes in Keratinocyte Overexpression from PMID: 30772301 | SOX2 |
| ARHGAP23 | SOX2 regulated genes in Keratinocyte Overexpression from PMID: 30772301 | SOX2 |
| CXCL6    | SOX2 regulated genes in Keratinocyte Overexpression from PMID: 30772301 | SOX2 |
| TRABD    | SOX2 regulated genes in Keratinocyte Overexpression from PMID: 30772301 | SOX2 |
| RIOK1    | SOX2 regulated genes in Keratinocyte Overexpression from PMID: 30772301 | SOX2 |
| HCFC1    | SOX2 regulated genes in Keratinocyte Overexpression from PMID: 30772301 | SOX2 |
| SLC52A1  | SOX2 regulated genes in Keratinocyte Overexpression from PMID: 30772301 | SOX2 |
| CRTAC1   | SOX2 regulated genes in Keratinocyte Overexpression from PMID: 30772301 | SOX2 |
| APEX2    | SOX2 regulated genes in Keratinocyte Overexpression from PMID: 30772301 | SOX2 |
| RASEF    | SOX2 regulated genes in Keratinocyte Overexpression from PMID: 30772301 | SOX2 |
| EGR3     | SOX2 regulated genes in Keratinocyte Overexpression from PMID: 30772301 | SOX2 |
| TRIM29   | SOX2 regulated genes in Keratinocyte Overexpression from PMID: 30772301 | SOX2 |
| DKK1     | SOX2 regulated genes in Keratinocyte Overexpression from PMID: 30772301 | SOX2 |
| SAMD8    | SOX2 regulated genes in Keratinocyte Overexpression from PMID: 30772301 | SOX2 |
| NUP58    | SOX2 regulated genes in Keratinocyte Overexpression from PMID: 30772301 | SOX2 |
| SIVA1    | SOX2 regulated genes in Keratinocyte Overexpression from PMID: 30772301 | SOX2 |
| LRFN4    | SOX2 regulated genes in Keratinocyte Overexpression from PMID: 30772301 | SOX2 |
| UMODL1   | SOX2 regulated genes in Keratinocyte Overexpression from PMID: 30772301 | SOX2 |
| POLR2E   | SOX2 regulated genes in Keratinocyte Overexpression from PMID: 30772301 | SOX2 |
| ACOT8    | SOX2 regulated genes in Keratinocyte Overexpression from PMID: 30772301 | SOX2 |
| NEDD8    | SOX2 regulated genes in Keratinocyte Overexpression from PMID: 30772301 | SOX2 |
| REM2     | SOX2 regulated genes in Keratinocyte Overexpression from PMID: 30772301 | SOX2 |
| ZNF503   | SOX2 regulated genes in Keratinocyte Overexpression from PMID: 30772301 | SOX2 |
| PRICKLE3 | SOX2 regulated genes in Keratinocyte Overexpression from PMID: 30772301 | SOX2 |
| RHOT2    | SOX2 regulated genes in Keratinocyte Overexpression from PMID: 30772301 | SOX2 |
| C15orf65 | SOX2 regulated genes in Keratinocyte Overexpression from PMID: 30772301 | SOX2 |
| TFAM     | SOX2 regulated genes in Keratinocyte Overexpression from PMID: 30772301 | SOX2 |
| SLC26A8  | SOX2 regulated genes in Keratinocyte Overexpression from PMID: 30772301 | SOX2 |
| PACSIN1  | SOX2 regulated genes in Keratinocyte Overexpression from PMID: 30772301 | SOX2 |
| FANCF    | SOX2 regulated genes in Keratinocyte Overexpression from PMID: 30772301 | SOX2 |
| SH3RF1   | SOX2 regulated genes in Keratinocyte Overexpression from PMID: 30772301 | SOX2 |
| OSBP     | SOX2 regulated genes in Keratinocyte Overexpression from PMID: 30772301 | SOX2 |
| NUP88    | SOX2 regulated genes in Keratinocyte Overexpression from PMID: 30772301 | SOX2 |
| PCID2    | SOX2 regulated genes in Keratinocyte Overexpression from PMID: 30772301 | SOX2 |
| SLCO4A1  | SOX2 regulated genes in Keratinocyte Overexpression from PMID: 30772301 | SOX2 |
| LMX1B    | SOX2 regulated genes in Keratinocyte Overexpression from PMID: 30772301 | SOX2 |
| SMC2     | SOX2 regulated genes in Keratinocyte Overexpression from PMID: 30772301 | SOX2 |
| FRMD8    | SOX2 regulated genes in Keratinocyte Overexpression from PMID: 30772301 | SOX2 |
| CWH43    | SOX2 regulated genes in Keratinocyte Overexpression from PMID: 30772301 | SOX2 |
| FNDC11   | SOX2 regulated genes in Keratinocyte Overexpression from PMID: 30772301 | SOX2 |
| ABCB7    | SOX2 regulated genes in Keratinocyte Overexpression from PMID: 30772301 | SOX2 |
| LPIN2    | SOX2 regulated genes in Keratinocyte Overexpression from PMID: 30772301 | SOX2 |
| TMEM251  | SOX2 regulated genes in Keratinocyte Overexpression from PMID: 30772301 | SOX2 |
| MIF      | SOX2 regulated genes in Keratinocyte Overexpression from PMID: 30772301 | SOX2 |
| MRPS2    | SOX2 regulated genes in Keratinocyte Overexpression from PMID: 30772301 | SOX2 |
| TERT     | SOX2 regulated genes in Keratinocyte Overexpression from PMID: 30772301 | SOX2 |
| THNSL1   | SOX2 regulated genes in Keratinocyte Overexpression from PMID: 30772301 | SOX2 |
| AK7      | SOX2 regulated genes in Keratinocyte Overexpression from PMID: 30772301 | SOX2 |
| RBMX     | SOX2 regulated genes in Keratinocyte Overexpression from PMID: 30772301 | SOX2 |
| SLC30A9  | SOX2 regulated genes in Keratinocyte Overexpression from PMID: 30772301 | SOX2 |
| CHIC2    | SOX2 regulated genes in Keratinocyte Overexpression from PMID: 30772301 | SOX2 |
| SLC44A1  | SOX2 regulated genes in Keratinocyte Overexpression from PMID: 30772301 | SOX2 |
| NGDN     | SOX2 regulated genes in Keratinocyte Overexpression from PMID: 30772301 | SOX2 |
| NEU3     | SOX2 regulated genes in Keratinocyte Overexpression from PMID: 30772301 | SOX2 |
| DSG1     | SOX2 regulated genes in Keratinocyte Overexpression from PMID: 30772301 | SOX2 |
| TAF1D    | SOX2 regulated genes in Keratinocyte Overexpression from PMID: 30772301 | SOX2 |
| TMEM144  | SOX2 regulated genes in Keratinocyte Overexpression from PMID: 30772301 | SOX2 |
| NSFL1C   | SOX2 regulated genes in Keratinocyte Overexpression from PMID: 30772301 | SOX2 |
| TTC5     | SOX2 regulated genes in Keratinocyte Overexpression from PMID: 30772301 | SOX2 |

|           |                                                                         |      |
|-----------|-------------------------------------------------------------------------|------|
| MRPL36    | SOX2 regulated genes in Keratinocyte Overexpression from PMID: 30772301 | SOX2 |
| NCLN      | SOX2 regulated genes in Keratinocyte Overexpression from PMID: 30772301 | SOX2 |
| RBM20     | SOX2 regulated genes in Keratinocyte Overexpression from PMID: 30772301 | SOX2 |
| FOXC1     | SOX2 regulated genes in Keratinocyte Overexpression from PMID: 30772301 | SOX2 |
| URM1      | SOX2 regulated genes in Keratinocyte Overexpression from PMID: 30772301 | SOX2 |
| TMEM255A  | SOX2 regulated genes in Keratinocyte Overexpression from PMID: 30772301 | SOX2 |
| PRPF19    | SOX2 regulated genes in Keratinocyte Overexpression from PMID: 30772301 | SOX2 |
| CCDC116   | SOX2 regulated genes in Keratinocyte Overexpression from PMID: 30772301 | SOX2 |
| RFXAP     | SOX2 regulated genes in Keratinocyte Overexpression from PMID: 30772301 | SOX2 |
| TDP1      | SOX2 regulated genes in Keratinocyte Overexpression from PMID: 30772301 | SOX2 |
| LEPROTL1  | SOX2 regulated genes in Keratinocyte Overexpression from PMID: 30772301 | SOX2 |
| RAB11FIP2 | SOX2 regulated genes in Keratinocyte Overexpression from PMID: 30772301 | SOX2 |
| PDCL      | SOX2 regulated genes in Keratinocyte Overexpression from PMID: 30772301 | SOX2 |
| TDRD3     | SOX2 regulated genes in Keratinocyte Overexpression from PMID: 30772301 | SOX2 |
| RND2      | SOX2 regulated genes in Keratinocyte Overexpression from PMID: 30772301 | SOX2 |
| TRIM68    | SOX2 regulated genes in Keratinocyte Overexpression from PMID: 30772301 | SOX2 |
| BMPER     | SOX2 regulated genes in Keratinocyte Overexpression from PMID: 30772301 | SOX2 |
| WFIKKN1   | SOX2 regulated genes in Keratinocyte Overexpression from PMID: 30772301 | SOX2 |
| MAPK11    | SOX2 regulated genes in Keratinocyte Overexpression from PMID: 30772301 | SOX2 |
| ZNF219    | SOX2 regulated genes in Keratinocyte Overexpression from PMID: 30772301 | SOX2 |
| ARHGAP24  | SOX2 regulated genes in Keratinocyte Overexpression from PMID: 30772301 | SOX2 |
| MUC15     | SOX2 regulated genes in Keratinocyte Overexpression from PMID: 30772301 | SOX2 |
| BCORL1    | SOX2 regulated genes in Keratinocyte Overexpression from PMID: 30772301 | SOX2 |
| NMRK1     | SOX2 regulated genes in Keratinocyte Overexpression from PMID: 30772301 | SOX2 |
| EVC2      | SOX2 regulated genes in Keratinocyte Overexpression from PMID: 30772301 | SOX2 |
| ARPC1A    | SOX2 regulated genes in Keratinocyte Overexpression from PMID: 30772301 | SOX2 |
| SHMT2     | SOX2 regulated genes in Keratinocyte Overexpression from PMID: 30772301 | SOX2 |
| CDC5L     | SOX2 regulated genes in Keratinocyte Overexpression from PMID: 30772301 | SOX2 |
| TLE6      | SOX2 regulated genes in Keratinocyte Overexpression from PMID: 30772301 | SOX2 |
| TEX9      | SOX2 regulated genes in Keratinocyte Overexpression from PMID: 30772301 | SOX2 |
| PRPSAP2   | SOX2 regulated genes in Keratinocyte Overexpression from PMID: 30772301 | SOX2 |
| ARGLU1    | SOX2 regulated genes in Keratinocyte Overexpression from PMID: 30772301 | SOX2 |
| FASTKD3   | SOX2 regulated genes in Keratinocyte Overexpression from PMID: 30772301 | SOX2 |
| SLTM      | SOX2 regulated genes in Keratinocyte Overexpression from PMID: 30772301 | SOX2 |
| PIM1      | SOX2 regulated genes in Keratinocyte Overexpression from PMID: 30772301 | SOX2 |
| PLAA      | SOX2 regulated genes in Keratinocyte Overexpression from PMID: 30772301 | SOX2 |
| UBQLN1    | SOX2 regulated genes in Keratinocyte Overexpression from PMID: 30772301 | SOX2 |
| ORMDL3    | SOX2 regulated genes in Keratinocyte Overexpression from PMID: 30772301 | SOX2 |
| TBRG4     | SOX2 regulated genes in Keratinocyte Overexpression from PMID: 30772301 | SOX2 |
| PORCN     | SOX2 regulated genes in Keratinocyte Overexpression from PMID: 30772301 | SOX2 |
| SNRPD1    | SOX2 regulated genes in Keratinocyte Overexpression from PMID: 30772301 | SOX2 |
| PSMF1     | SOX2 regulated genes in Keratinocyte Overexpression from PMID: 30772301 | SOX2 |
| MRPL50    | SOX2 regulated genes in Keratinocyte Overexpression from PMID: 30772301 | SOX2 |
| SLC10A4   | SOX2 regulated genes in Keratinocyte Overexpression from PMID: 30772301 | SOX2 |
| AIMP2     | SOX2 regulated genes in Keratinocyte Overexpression from PMID: 30772301 | SOX2 |
| TRMT11    | SOX2 regulated genes in Keratinocyte Overexpression from PMID: 30772301 | SOX2 |
| GATAD1    | SOX2 regulated genes in Keratinocyte Overexpression from PMID: 30772301 | SOX2 |
| AARS2     | SOX2 regulated genes in Keratinocyte Overexpression from PMID: 30772301 | SOX2 |
| RDM1      | SOX2 regulated genes in Keratinocyte Overexpression from PMID: 30772301 | SOX2 |
| CBFA2T2   | SOX2 regulated genes in Keratinocyte Overexpression from PMID: 30772301 | SOX2 |
| UBE2A     | SOX2 regulated genes in Keratinocyte Overexpression from PMID: 30772301 | SOX2 |
| C9orf85   | SOX2 regulated genes in Keratinocyte Overexpression from PMID: 30772301 | SOX2 |
| COL4A5    | SOX2 regulated genes in Keratinocyte Overexpression from PMID: 30772301 | SOX2 |
| GSDMA     | SOX2 regulated genes in Keratinocyte Overexpression from PMID: 30772301 | SOX2 |
| PRIM2     | SOX2 regulated genes in Keratinocyte Overexpression from PMID: 30772301 | SOX2 |
| CBX6      | SOX2 regulated genes in Keratinocyte Overexpression from PMID: 30772301 | SOX2 |
| RPGR      | SOX2 regulated genes in Keratinocyte Overexpression from PMID: 30772301 | SOX2 |
| P2RX5     | SOX2 regulated genes in Keratinocyte Overexpression from PMID: 30772301 | SOX2 |
| NUDT15    | SOX2 regulated genes in Keratinocyte Overexpression from PMID: 30772301 | SOX2 |



|          |                                                                         |      |
|----------|-------------------------------------------------------------------------|------|
| IPO4     | SOX2 regulated genes in Keratinocyte Overexpression from PMID: 30772301 | SOX2 |
| FAM204A  | SOX2 regulated genes in Keratinocyte Overexpression from PMID: 30772301 | SOX2 |
| SDAD1    | SOX2 regulated genes in Keratinocyte Overexpression from PMID: 30772301 | SOX2 |
| STK24    | SOX2 regulated genes in Keratinocyte Overexpression from PMID: 30772301 | SOX2 |
| SLC34A2  | SOX2 regulated genes in Keratinocyte Overexpression from PMID: 30772301 | SOX2 |
| RAP2C    | SOX2 regulated genes in Keratinocyte Overexpression from PMID: 30772301 | SOX2 |
| C7orf50  | SOX2 regulated genes in Keratinocyte Overexpression from PMID: 30772301 | SOX2 |
| BARX1    | SOX2 regulated genes in Keratinocyte Overexpression from PMID: 30772301 | SOX2 |
| ZDHHC16  | SOX2 regulated genes in Keratinocyte Overexpression from PMID: 30772301 | SOX2 |
| PHF2     | SOX2 regulated genes in Keratinocyte Overexpression from PMID: 30772301 | SOX2 |
| ARFGAP2  | SOX2 regulated genes in Keratinocyte Overexpression from PMID: 30772301 | SOX2 |
| RPS27L   | SOX2 regulated genes in Keratinocyte Overexpression from PMID: 30772301 | SOX2 |
| PSMB7    | SOX2 regulated genes in Keratinocyte Overexpression from PMID: 30772301 | SOX2 |
| FAU      | SOX2 regulated genes in Keratinocyte Overexpression from PMID: 30772301 | SOX2 |
| PRDM8    | SOX2 regulated genes in Keratinocyte Overexpression from PMID: 30772301 | SOX2 |
| ANKRD50  | SOX2 regulated genes in Keratinocyte Overexpression from PMID: 30772301 | SOX2 |
| ID4      | SOX2 regulated genes in Keratinocyte Overexpression from PMID: 30772301 | SOX2 |
| SERPINB5 | SOX2 regulated genes in Keratinocyte Overexpression from PMID: 30772301 | SOX2 |
| PARM1    | SOX2 regulated genes in Keratinocyte Overexpression from PMID: 30772301 | SOX2 |
| RIBC1    | SOX2 regulated genes in Keratinocyte Overexpression from PMID: 30772301 | SOX2 |
| MRPS31   | SOX2 regulated genes in Keratinocyte Overexpression from PMID: 30772301 | SOX2 |
| IGF2BP3  | SOX2 regulated genes in Keratinocyte Overexpression from PMID: 30772301 | SOX2 |
| U2AF1L5  | SOX2 regulated genes in Keratinocyte Overexpression from PMID: 30772301 | SOX2 |
| TFAP2B   | SOX2 regulated genes in Keratinocyte Overexpression from PMID: 30772301 | SOX2 |
| E4F1     | SOX2 regulated genes in Keratinocyte Overexpression from PMID: 30772301 | SOX2 |
| OPHN1    | SOX2 regulated genes in Keratinocyte Overexpression from PMID: 30772301 | SOX2 |
| SOX12    | SOX2 regulated genes in Keratinocyte Overexpression from PMID: 30772301 | SOX2 |
| CEP78    | SOX2 regulated genes in Keratinocyte Overexpression from PMID: 30772301 | SOX2 |
| HOMEZ    | SOX2 regulated genes in Keratinocyte Overexpression from PMID: 30772301 | SOX2 |
| TRIL     | SOX2 regulated genes in Keratinocyte Overexpression from PMID: 30772301 | SOX2 |
| PEBP4    | SOX2 regulated genes in Keratinocyte Overexpression from PMID: 30772301 | SOX2 |
| ARIH1    | SOX2 regulated genes in Keratinocyte Overexpression from PMID: 30772301 | SOX2 |
| NKAP     | SOX2 regulated genes in Keratinocyte Overexpression from PMID: 30772301 | SOX2 |
| ASCC3    | SOX2 regulated genes in Keratinocyte Overexpression from PMID: 30772301 | SOX2 |
| GPKOW    | SOX2 regulated genes in Keratinocyte Overexpression from PMID: 30772301 | SOX2 |
| BORCS5   | SOX2 regulated genes in Keratinocyte Overexpression from PMID: 30772301 | SOX2 |
| SEC14L2  | SOX2 regulated genes in Keratinocyte Overexpression from PMID: 30772301 | SOX2 |
| CCDC169  | SOX2 regulated genes in Keratinocyte Overexpression from PMID: 30772301 | SOX2 |
| RWDD4    | SOX2 regulated genes in Keratinocyte Overexpression from PMID: 30772301 | SOX2 |
| AFG3L2   | SOX2 regulated genes in Keratinocyte Overexpression from PMID: 30772301 | SOX2 |
| UXT      | SOX2 regulated genes in Keratinocyte Overexpression from PMID: 30772301 | SOX2 |
| ZNHIT2   | SOX2 regulated genes in Keratinocyte Overexpression from PMID: 30772301 | SOX2 |
| HSPA4L   | SOX2 regulated genes in Keratinocyte Overexpression from PMID: 30772301 | SOX2 |
| GON7     | SOX2 regulated genes in Keratinocyte Overexpression from PMID: 30772301 | SOX2 |
| PCNA     | SOX2 regulated genes in Keratinocyte Overexpression from PMID: 30772301 | SOX2 |
| ENDOU    | SOX2 regulated genes in Keratinocyte Overexpression from PMID: 30772301 | SOX2 |
| AGR2     | SOX2 regulated genes in Keratinocyte Overexpression from PMID: 30772301 | SOX2 |
| EIF2AK4  | SOX2 regulated genes in Keratinocyte Overexpression from PMID: 30772301 | SOX2 |
| RTCB     | SOX2 regulated genes in Keratinocyte Overexpression from PMID: 30772301 | SOX2 |
| RPP40    | SOX2 regulated genes in Keratinocyte Overexpression from PMID: 30772301 | SOX2 |
| KIAA1217 | SOX2 regulated genes in Keratinocyte Overexpression from PMID: 30772301 | SOX2 |
| CDCA7L   | SOX2 regulated genes in Keratinocyte Overexpression from PMID: 30772301 | SOX2 |
| SCD      | SOX2 regulated genes in Keratinocyte Overexpression from PMID: 30772301 | SOX2 |
| CDC42EP2 | SOX2 regulated genes in Keratinocyte Overexpression from PMID: 30772301 | SOX2 |
| FOXO1    | SOX2 regulated genes in Keratinocyte Overexpression from PMID: 30772301 | SOX2 |
| ONECUT3  | SOX2 regulated genes in Keratinocyte Overexpression from PMID: 30772301 | SOX2 |
| TCFL5    | SOX2 regulated genes in Keratinocyte Overexpression from PMID: 30772301 | SOX2 |
| RPL35    | SOX2 regulated genes in Keratinocyte Overexpression from PMID: 30772301 | SOX2 |
| HACE1    | SOX2 regulated genes in Keratinocyte Overexpression from PMID: 30772301 | SOX2 |



|           |                                                                         |      |
|-----------|-------------------------------------------------------------------------|------|
| QSOX2     | SOX2 regulated genes in Keratinocyte Overexpression from PMID: 30772301 | SOX2 |
| HNRNPD    | SOX2 regulated genes in Keratinocyte Overexpression from PMID: 30772301 | SOX2 |
| PLXNA3    | SOX2 regulated genes in Keratinocyte Overexpression from PMID: 30772301 | SOX2 |
| UQCR10    | SOX2 regulated genes in Keratinocyte Overexpression from PMID: 30772301 | SOX2 |
| AASDHPPT  | SOX2 regulated genes in Keratinocyte Overexpression from PMID: 30772301 | SOX2 |
| TXNL4A    | SOX2 regulated genes in Keratinocyte Overexpression from PMID: 30772301 | SOX2 |
| CEP295    | SOX2 regulated genes in Keratinocyte Overexpression from PMID: 30772301 | SOX2 |
| ZNF280C   | SOX2 regulated genes in Keratinocyte Overexpression from PMID: 30772301 | SOX2 |
| TAX1BP3   | SOX2 regulated genes in Keratinocyte Overexpression from PMID: 30772301 | SOX2 |
| ELP4      | SOX2 regulated genes in Keratinocyte Overexpression from PMID: 30772301 | SOX2 |
| RPUSD2    | SOX2 regulated genes in Keratinocyte Overexpression from PMID: 30772301 | SOX2 |
| EIF3A     | SOX2 regulated genes in Keratinocyte Overexpression from PMID: 30772301 | SOX2 |
| TSPAN14   | SOX2 regulated genes in Keratinocyte Overexpression from PMID: 30772301 | SOX2 |
| HMGXB4    | SOX2 regulated genes in Keratinocyte Overexpression from PMID: 30772301 | SOX2 |
| YTHDF1    | SOX2 regulated genes in Keratinocyte Overexpression from PMID: 30772301 | SOX2 |
| SPEF1     | SOX2 regulated genes in Keratinocyte Overexpression from PMID: 30772301 | SOX2 |
| JARID2    | SOX2 regulated genes in Keratinocyte Overexpression from PMID: 30772301 | SOX2 |
| TXN       | SOX2 regulated genes in Keratinocyte Overexpression from PMID: 30772301 | SOX2 |
| OAT       | SOX2 regulated genes in Keratinocyte Overexpression from PMID: 30772301 | SOX2 |
| PRMT9     | SOX2 regulated genes in Keratinocyte Overexpression from PMID: 30772301 | SOX2 |
| ATP12A    | SOX2 regulated genes in Keratinocyte Overexpression from PMID: 30772301 | SOX2 |
| OSER1     | SOX2 regulated genes in Keratinocyte Overexpression from PMID: 30772301 | SOX2 |
| ZNF335    | SOX2 regulated genes in Keratinocyte Overexpression from PMID: 30772301 | SOX2 |
| ZSWIM3    | SOX2 regulated genes in Keratinocyte Overexpression from PMID: 30772301 | SOX2 |
| SFXN2     | SOX2 regulated genes in Keratinocyte Overexpression from PMID: 30772301 | SOX2 |
| ZFAND5    | SOX2 regulated genes in Keratinocyte Overexpression from PMID: 30772301 | SOX2 |
| ETNPPL    | SOX2 regulated genes in Keratinocyte Overexpression from PMID: 30772301 | SOX2 |
| RGP1      | SOX2 regulated genes in Keratinocyte Overexpression from PMID: 30772301 | SOX2 |
| TRUB2     | SOX2 regulated genes in Keratinocyte Overexpression from PMID: 30772301 | SOX2 |
| RCAN1     | SOX2 regulated genes in Keratinocyte Overexpression from PMID: 30772301 | SOX2 |
| C11orf58  | SOX2 regulated genes in Keratinocyte Overexpression from PMID: 30772301 | SOX2 |
| MAK16     | SOX2 regulated genes in Keratinocyte Overexpression from PMID: 30772301 | SOX2 |
| TNFRSF13C | SOX2 regulated genes in Keratinocyte Overexpression from PMID: 30772301 | SOX2 |
| ZNF330    | SOX2 regulated genes in Keratinocyte Overexpression from PMID: 30772301 | SOX2 |
| FPGS      | SOX2 regulated genes in Keratinocyte Overexpression from PMID: 30772301 | SOX2 |
| DHX33     | SOX2 regulated genes in Keratinocyte Overexpression from PMID: 30772301 | SOX2 |
| SAC3D1    | SOX2 regulated genes in Keratinocyte Overexpression from PMID: 30772301 | SOX2 |
| RAB40C    | SOX2 regulated genes in Keratinocyte Overexpression from PMID: 30772301 | SOX2 |
| RFLNB     | SOX2 regulated genes in Keratinocyte Overexpression from PMID: 30772301 | SOX2 |
| MACROD2   | SOX2 regulated genes in Keratinocyte Overexpression from PMID: 30772301 | SOX2 |
| VNN1      | SOX2 regulated genes in Keratinocyte Overexpression from PMID: 30772301 | SOX2 |
| HIPK3     | SOX2 regulated genes in Keratinocyte Overexpression from PMID: 30772301 | SOX2 |
| ARHGEF39  | SOX2 regulated genes in Keratinocyte Overexpression from PMID: 30772301 | SOX2 |
| PGAP3     | SOX2 regulated genes in Keratinocyte Overexpression from PMID: 30772301 | SOX2 |
| CCKBR     | SOX2 regulated genes in Keratinocyte Overexpression from PMID: 30772301 | SOX2 |
| BMS1      | SOX2 regulated genes in Keratinocyte Overexpression from PMID: 30772301 | SOX2 |
| MED31     | SOX2 regulated genes in Keratinocyte Overexpression from PMID: 30772301 | SOX2 |
| DCDC2     | SOX2 regulated genes in Keratinocyte Overexpression from PMID: 30772301 | SOX2 |
| XRCC6     | SOX2 regulated genes in Keratinocyte Overexpression from PMID: 30772301 | SOX2 |
| EGFL6     | SOX2 regulated genes in Keratinocyte Overexpression from PMID: 30772301 | SOX2 |
| KCTD9     | SOX2 regulated genes in Keratinocyte Overexpression from PMID: 30772301 | SOX2 |
| SNX12     | SOX2 regulated genes in Keratinocyte Overexpression from PMID: 30772301 | SOX2 |
| NT5C3B    | SOX2 regulated genes in Keratinocyte Overexpression from PMID: 30772301 | SOX2 |
| BCCIP     | SOX2 regulated genes in Keratinocyte Overexpression from PMID: 30772301 | SOX2 |
| STUB1     | SOX2 regulated genes in Keratinocyte Overexpression from PMID: 30772301 | SOX2 |
| INIP      | SOX2 regulated genes in Keratinocyte Overexpression from PMID: 30772301 | SOX2 |
| DDX3X     | SOX2 regulated genes in Keratinocyte Overexpression from PMID: 30772301 | SOX2 |
| ANKRD10   | SOX2 regulated genes in Keratinocyte Overexpression from PMID: 30772301 | SOX2 |
| EHMT1     | SOX2 regulated genes in Keratinocyte Overexpression from PMID: 30772301 | SOX2 |







|          |                                                                         |      |
|----------|-------------------------------------------------------------------------|------|
| DBR1     | SOX2 regulated genes in Keratinocyte Overexpression from PMID: 30772301 | SOX2 |
| MPV17L   | SOX2 regulated genes in Keratinocyte Overexpression from PMID: 30772301 | SOX2 |
| IFT74    | SOX2 regulated genes in Keratinocyte Overexpression from PMID: 30772301 | SOX2 |
| CYP1B1   | SOX2 regulated genes in Keratinocyte Overexpression from PMID: 30772301 | SOX2 |
| TG       | SOX2 regulated genes in Keratinocyte Overexpression from PMID: 30772301 | SOX2 |
| CDSN     | SOX2 regulated genes in Keratinocyte Overexpression from PMID: 30772301 | SOX2 |
| PAIP2B   | SOX2 regulated genes in Keratinocyte Overexpression from PMID: 30772301 | SOX2 |
| DTYMK    | SOX2 regulated genes in Keratinocyte Overexpression from PMID: 30772301 | SOX2 |
| SPATA5L1 | SOX2 regulated genes in Keratinocyte Overexpression from PMID: 30772301 | SOX2 |
| COPG2    | SOX2 regulated genes in Keratinocyte Overexpression from PMID: 30772301 | SOX2 |
| ZBTB40   | SOX2 regulated genes in Keratinocyte Overexpression from PMID: 30772301 | SOX2 |
| CTU2     | SOX2 regulated genes in Keratinocyte Overexpression from PMID: 30772301 | SOX2 |
| NEIL1    | SOX2 regulated genes in Keratinocyte Overexpression from PMID: 30772301 | SOX2 |
| MYCBP    | SOX2 regulated genes in Keratinocyte Overexpression from PMID: 30772301 | SOX2 |
| BDKRB2   | SOX2 regulated genes in Keratinocyte Overexpression from PMID: 30772301 | SOX2 |
| BHLHB9   | SOX2 regulated genes in Keratinocyte Overexpression from PMID: 30772301 | SOX2 |
| CHCHD2   | SOX2 regulated genes in Keratinocyte Overexpression from PMID: 30772301 | SOX2 |
| POLR2L   | SOX2 regulated genes in Keratinocyte Overexpression from PMID: 30772301 | SOX2 |
| SNRNP200 | SOX2 regulated genes in Keratinocyte Overexpression from PMID: 30772301 | SOX2 |
| CALCOCO1 | SOX2 regulated genes in Keratinocyte Overexpression from PMID: 30772301 | SOX2 |
| NUP107   | SOX2 regulated genes in Keratinocyte Overexpression from PMID: 30772301 | SOX2 |
| NDE1     | SOX2 regulated genes in Keratinocyte Overexpression from PMID: 30772301 | SOX2 |
| SKIV2L   | SOX2 regulated genes in Keratinocyte Overexpression from PMID: 30772301 | SOX2 |
| PRSS36   | SOX2 regulated genes in Keratinocyte Overexpression from PMID: 30772301 | SOX2 |
| RNF19A   | SOX2 regulated genes in Keratinocyte Overexpression from PMID: 30772301 | SOX2 |
| SOD2     | SOX2 regulated genes in Keratinocyte Overexpression from PMID: 30772301 | SOX2 |
| FXN      | SOX2 regulated genes in Keratinocyte Overexpression from PMID: 30772301 | SOX2 |
| NOXA1    | SOX2 regulated genes in Keratinocyte Overexpression from PMID: 30772301 | SOX2 |
| EXOSC6   | SOX2 regulated genes in Keratinocyte Overexpression from PMID: 30772301 | SOX2 |
| TRPV3    | SOX2 regulated genes in Keratinocyte Overexpression from PMID: 30772301 | SOX2 |
| TMEM115  | SOX2 regulated genes in Keratinocyte Overexpression from PMID: 30772301 | SOX2 |
| FBXO43   | SOX2 regulated genes in Keratinocyte Overexpression from PMID: 30772301 | SOX2 |
| PDIA2    | SOX2 regulated genes in Keratinocyte Overexpression from PMID: 30772301 | SOX2 |
| HAUS7    | SOX2 regulated genes in Keratinocyte Overexpression from PMID: 30772301 | SOX2 |
| IL17D    | SOX2 regulated genes in Keratinocyte Overexpression from PMID: 30772301 | SOX2 |
| RAD52    | SOX2 regulated genes in Keratinocyte Overexpression from PMID: 30772301 | SOX2 |
| INHBB    | SOX2 regulated genes in Keratinocyte Overexpression from PMID: 30772301 | SOX2 |
| FAM184B  | SOX2 regulated genes in Keratinocyte Overexpression from PMID: 30772301 | SOX2 |
| TAPT1    | SOX2 regulated genes in Keratinocyte Overexpression from PMID: 30772301 | SOX2 |
| UBXN2A   | SOX2 regulated genes in Keratinocyte Overexpression from PMID: 30772301 | SOX2 |
| SEMA4G   | SOX2 regulated genes in Keratinocyte Overexpression from PMID: 30772301 | SOX2 |
| CPT1A    | SOX2 regulated genes in Keratinocyte Overexpression from PMID: 30772301 | SOX2 |
| BRMS1    | SOX2 regulated genes in Keratinocyte Overexpression from PMID: 30772301 | SOX2 |
| ARHGEF26 | SOX2 regulated genes in Keratinocyte Overexpression from PMID: 30772301 | SOX2 |
| PTCD1    | SOX2 regulated genes in Keratinocyte Overexpression from PMID: 30772301 | SOX2 |
| CDKN1A   | SOX2 regulated genes in Keratinocyte Overexpression from PMID: 30772301 | SOX2 |
| CABLES2  | SOX2 regulated genes in Keratinocyte Overexpression from PMID: 30772301 | SOX2 |
| RBM22    | SOX2 regulated genes in Keratinocyte Overexpression from PMID: 30772301 | SOX2 |
| MTHFD2L  | SOX2 regulated genes in Keratinocyte Overexpression from PMID: 30772301 | SOX2 |
| DTX3     | SOX2 regulated genes in Keratinocyte Overexpression from PMID: 30772301 | SOX2 |
| SMARCAD1 | SOX2 regulated genes in Keratinocyte Overexpression from PMID: 30772301 | SOX2 |
| DRD4     | SOX2 regulated genes in Keratinocyte Overexpression from PMID: 30772301 | SOX2 |
| KLK1     | SOX2 regulated genes in Keratinocyte Overexpression from PMID: 30772301 | SOX2 |
| LAMB1    | SOX2 regulated genes in Keratinocyte Overexpression from PMID: 30772301 | SOX2 |
| RNF185   | SOX2 regulated genes in Keratinocyte Overexpression from PMID: 30772301 | SOX2 |
| POLR1D   | SOX2 regulated genes in Keratinocyte Overexpression from PMID: 30772301 | SOX2 |
| GLE1     | SOX2 regulated genes in Keratinocyte Overexpression from PMID: 30772301 | SOX2 |
| CBY1     | SOX2 regulated genes in Keratinocyte Overexpression from PMID: 30772301 | SOX2 |
| SPOPL    | SOX2 regulated genes in Keratinocyte Overexpression from PMID: 30772301 | SOX2 |



|          |                                                                         |      |
|----------|-------------------------------------------------------------------------|------|
| NCBP2L   | SOX2 regulated genes in Keratinocyte Overexpression from PMID: 30772301 | SOX2 |
| CHP1     | SOX2 regulated genes in Keratinocyte Overexpression from PMID: 30772301 | SOX2 |
| BRPF3    | SOX2 regulated genes in Keratinocyte Overexpression from PMID: 30772301 | SOX2 |
| KRTAP9-4 | SOX2 regulated genes in Keratinocyte Overexpression from PMID: 30772301 | SOX2 |
| XPO4     | SOX2 regulated genes in Keratinocyte Overexpression from PMID: 30772301 | SOX2 |
| DDA1     | SOX2 regulated genes in Keratinocyte Overexpression from PMID: 30772301 | SOX2 |
| DOCK3    | SOX2 regulated genes in Keratinocyte Overexpression from PMID: 30772301 | SOX2 |
| ENO4     | SOX2 regulated genes in Keratinocyte Overexpression from PMID: 30772301 | SOX2 |
| TUSC2    | SOX2 regulated genes in Keratinocyte Overexpression from PMID: 30772301 | SOX2 |
| SPEN     | SOX2 regulated genes in Keratinocyte Overexpression from PMID: 30772301 | SOX2 |
| DHFR     | SOX2 regulated genes in Keratinocyte Overexpression from PMID: 30772301 | SOX2 |
| MED6     | SOX2 regulated genes in Keratinocyte Overexpression from PMID: 30772301 | SOX2 |
| KANK4    | SOX2 regulated genes in Keratinocyte Overexpression from PMID: 30772301 | SOX2 |
| FUS      | SOX2 regulated genes in Keratinocyte Overexpression from PMID: 30772301 | SOX2 |
| SGF29    | SOX2 regulated genes in Keratinocyte Overexpression from PMID: 30772301 | SOX2 |
| EPB41L5  | SOX2 regulated genes in Keratinocyte Overexpression from PMID: 30772301 | SOX2 |
| STAM2    | SOX2 regulated genes in Keratinocyte Overexpression from PMID: 30772301 | SOX2 |
| FEM1C    | SOX2 regulated genes in Keratinocyte Overexpression from PMID: 30772301 | SOX2 |
| CKAP2    | SOX2 regulated genes in Keratinocyte Overexpression from PMID: 30772301 | SOX2 |
| SLC25A25 | SOX2 regulated genes in Keratinocyte Overexpression from PMID: 30772301 | SOX2 |
| OXNAD1   | SOX2 regulated genes in Keratinocyte Overexpression from PMID: 30772301 | SOX2 |
| PPP6R1   | SOX2 regulated genes in Keratinocyte Overexpression from PMID: 30772301 | SOX2 |
| TMEM86B  | SOX2 regulated genes in Keratinocyte Overexpression from PMID: 30772301 | SOX2 |
| AGMAT    | SOX2 regulated genes in Keratinocyte Overexpression from PMID: 30772301 | SOX2 |
| DYNLRB2  | SOX2 regulated genes in Keratinocyte Overexpression from PMID: 30772301 | SOX2 |
| HYLS1    | SOX2 regulated genes in Keratinocyte Overexpression from PMID: 30772301 | SOX2 |
| ZNF398   | SOX2 regulated genes in Keratinocyte Overexpression from PMID: 30772301 | SOX2 |
| CMSS1    | SOX2 regulated genes in Keratinocyte Overexpression from PMID: 30772301 | SOX2 |
| CMTM8    | SOX2 regulated genes in Keratinocyte Overexpression from PMID: 30772301 | SOX2 |
| PDCD7    | SOX2 regulated genes in Keratinocyte Overexpression from PMID: 30772301 | SOX2 |
| MAP3K10  | SOX2 regulated genes in Keratinocyte Overexpression from PMID: 30772301 | SOX2 |
| CCDC65   | SOX2 regulated genes in Keratinocyte Overexpression from PMID: 30772301 | SOX2 |
| RDX      | SOX2 regulated genes in Keratinocyte Overexpression from PMID: 30772301 | SOX2 |
| NOA1     | SOX2 regulated genes in Keratinocyte Overexpression from PMID: 30772301 | SOX2 |
| RPA1     | SOX2 regulated genes in Keratinocyte Overexpression from PMID: 30772301 | SOX2 |
| DOC2A    | SOX2 regulated genes in Keratinocyte Overexpression from PMID: 30772301 | SOX2 |
| LARGE2   | SOX2 regulated genes in Keratinocyte Overexpression from PMID: 30772301 | SOX2 |
| GABRE    | SOX2 regulated genes in Keratinocyte Overexpression from PMID: 30772301 | SOX2 |
| MED13    | SOX2 regulated genes in Keratinocyte Overexpression from PMID: 30772301 | SOX2 |
| IRF2BP1  | SOX2 regulated genes in Keratinocyte Overexpression from PMID: 30772301 | SOX2 |
| RBM19    | SOX2 regulated genes in Keratinocyte Overexpression from PMID: 30772301 | SOX2 |
| AMTN     | SOX2 regulated genes in Keratinocyte Overexpression from PMID: 30772301 | SOX2 |
| PROM2    | SOX2 regulated genes in Keratinocyte Overexpression from PMID: 30772301 | SOX2 |
| JUP      | SOX2 regulated genes in Keratinocyte Overexpression from PMID: 30772301 | SOX2 |
| CTR9     | SOX2 regulated genes in Keratinocyte Overexpression from PMID: 30772301 | SOX2 |
| FRMPD1   | SOX2 regulated genes in Keratinocyte Overexpression from PMID: 30772301 | SOX2 |
| SLC5A8   | SOX2 regulated genes in Keratinocyte Overexpression from PMID: 30772301 | SOX2 |
| HSPA1A   | SOX2 regulated genes in Keratinocyte Overexpression from PMID: 30772301 | SOX2 |
| HSPA1B   | SOX2 regulated genes in Keratinocyte Overexpression from PMID: 30772301 | SOX2 |
| PNOC     | SOX2 regulated genes in Keratinocyte Overexpression from PMID: 30772301 | SOX2 |
| GRHL2    | SOX2 regulated genes in Keratinocyte Overexpression from PMID: 30772301 | SOX2 |
| KANK1    | SOX2 regulated genes in Keratinocyte Overexpression from PMID: 30772301 | SOX2 |
| ARFGEF1  | SOX2 regulated genes in Keratinocyte Overexpression from PMID: 30772301 | SOX2 |
| NOL7     | SOX2 regulated genes in Keratinocyte Overexpression from PMID: 30772301 | SOX2 |
| NAF1     | SOX2 regulated genes in Keratinocyte Overexpression from PMID: 30772301 | SOX2 |
| RHCG     | SOX2 regulated genes in Keratinocyte Overexpression from PMID: 30772301 | SOX2 |
| ATP6V1C1 | SOX2 regulated genes in Keratinocyte Overexpression from PMID: 30772301 | SOX2 |
| ZNF212   | SOX2 regulated genes in Keratinocyte Overexpression from PMID: 30772301 | SOX2 |
| MAD1L1   | SOX2 regulated genes in Keratinocyte Overexpression from PMID: 30772301 | SOX2 |

|          |                                                                         |      |
|----------|-------------------------------------------------------------------------|------|
| GRPEL2   | SOX2 regulated genes in Keratinocyte Overexpression from PMID: 30772301 | SOX2 |
| UBE3C    | SOX2 regulated genes in Keratinocyte Overexpression from PMID: 30772301 | SOX2 |
| TMEM147  | SOX2 regulated genes in Keratinocyte Overexpression from PMID: 30772301 | SOX2 |
| C16orf87 | SOX2 regulated genes in Keratinocyte Overexpression from PMID: 30772301 | SOX2 |
| DYNLT1   | SOX2 regulated genes in Keratinocyte Overexpression from PMID: 30772301 | SOX2 |
| NRF1     | SOX2 regulated genes in Keratinocyte Overexpression from PMID: 30772301 | SOX2 |
| CRHBP    | SOX2 regulated genes in Keratinocyte Overexpression from PMID: 30772301 | SOX2 |
| SGTB     | SOX2 regulated genes in Keratinocyte Overexpression from PMID: 30772301 | SOX2 |
| IDI2     | SOX2 regulated genes in Keratinocyte Overexpression from PMID: 30772301 | SOX2 |
| TIMM17B  | SOX2 regulated genes in Keratinocyte Overexpression from PMID: 30772301 | SOX2 |
| MATN4    | SOX2 regulated genes in Keratinocyte Overexpression from PMID: 30772301 | SOX2 |
| COL12A1  | SOX2 regulated genes in Keratinocyte Overexpression from PMID: 30772301 | SOX2 |
| FBXO32   | SOX2 regulated genes in Keratinocyte Overexpression from PMID: 30772301 | SOX2 |
| COX6A1   | SOX2 regulated genes in Keratinocyte Overexpression from PMID: 30772301 | SOX2 |
| EIF3J    | SOX2 regulated genes in Keratinocyte Overexpression from PMID: 30772301 | SOX2 |
| SOWAHA   | SOX2 regulated genes in Keratinocyte Overexpression from PMID: 30772301 | SOX2 |
| VCL      | SOX2 regulated genes in Keratinocyte Overexpression from PMID: 30772301 | SOX2 |
| PHF20L1  | SOX2 regulated genes in Keratinocyte Overexpression from PMID: 30772301 | SOX2 |
| RAPGEF4  | SOX2 regulated genes in Keratinocyte Overexpression from PMID: 30772301 | SOX2 |
| METTL17  | SOX2 regulated genes in Keratinocyte Overexpression from PMID: 30772301 | SOX2 |
| SCRIB    | SOX2 regulated genes in Keratinocyte Overexpression from PMID: 30772301 | SOX2 |
| SHISA2   | SOX2 regulated genes in Keratinocyte Overexpression from PMID: 30772301 | SOX2 |
| PBX2     | SOX2 regulated genes in Keratinocyte Overexpression from PMID: 30772301 | SOX2 |
| SYTL1    | SOX2 regulated genes in Keratinocyte Overexpression from PMID: 30772301 | SOX2 |
| RNF103   | SOX2 regulated genes in Keratinocyte Overexpression from PMID: 30772301 | SOX2 |
| KMT5B    | SOX2 regulated genes in Keratinocyte Overexpression from PMID: 30772301 | SOX2 |
| SMG9     | SOX2 regulated genes in Keratinocyte Overexpression from PMID: 30772301 | SOX2 |
| ALX1     | SOX2 regulated genes in Keratinocyte Overexpression from PMID: 30772301 | SOX2 |
| IFT57    | SOX2 regulated genes in Keratinocyte Overexpression from PMID: 30772301 | SOX2 |
| LRRC74A  | SOX2 regulated genes in Keratinocyte Overexpression from PMID: 30772301 | SOX2 |
| CPT2     | SOX2 regulated genes in Keratinocyte Overexpression from PMID: 30772301 | SOX2 |
| NUDT14   | SOX2 regulated genes in Keratinocyte Overexpression from PMID: 30772301 | SOX2 |
| COPS5    | SOX2 regulated genes in Keratinocyte Overexpression from PMID: 30772301 | SOX2 |
| LANCL1   | SOX2 regulated genes in Keratinocyte Overexpression from PMID: 30772301 | SOX2 |
| TTC9C    | SOX2 regulated genes in Keratinocyte Overexpression from PMID: 30772301 | SOX2 |
| COX18    | SOX2 regulated genes in Keratinocyte Overexpression from PMID: 30772301 | SOX2 |
| RSPH9    | SOX2 regulated genes in Keratinocyte Overexpression from PMID: 30772301 | SOX2 |
| SARS2    | SOX2 regulated genes in Keratinocyte Overexpression from PMID: 30772301 | SOX2 |
| FIS1     | SOX2 regulated genes in Keratinocyte Overexpression from PMID: 30772301 | SOX2 |
| POLE3    | SOX2 regulated genes in Keratinocyte Overexpression from PMID: 30772301 | SOX2 |
| SSNA1    | SOX2 regulated genes in Keratinocyte Overexpression from PMID: 30772301 | SOX2 |
| GPAA1    | SOX2 regulated genes in Keratinocyte Overexpression from PMID: 30772301 | SOX2 |
| MRE11    | SOX2 regulated genes in Keratinocyte Overexpression from PMID: 30772301 | SOX2 |
| UBE3A    | SOX2 regulated genes in Keratinocyte Overexpression from PMID: 30772301 | SOX2 |
| SPOP     | SOX2 regulated genes in Keratinocyte Overexpression from PMID: 30772301 | SOX2 |
| POC5     | SOX2 regulated genes in Keratinocyte Overexpression from PMID: 30772301 | SOX2 |
| HSPA5    | SOX2 regulated genes in Keratinocyte Overexpression from PMID: 30772301 | SOX2 |
| PDCL3    | SOX2 regulated genes in Keratinocyte Overexpression from PMID: 30772301 | SOX2 |
| PSMA2    | SOX2 regulated genes in Keratinocyte Overexpression from PMID: 30772301 | SOX2 |
| ALDH5A1  | SOX2 regulated genes in Keratinocyte Overexpression from PMID: 30772301 | SOX2 |
| MRPS23   | SOX2 regulated genes in Keratinocyte Overexpression from PMID: 30772301 | SOX2 |
| TFB1M    | SOX2 regulated genes in Keratinocyte Overexpression from PMID: 30772301 | SOX2 |
| PANK3    | SOX2 regulated genes in Keratinocyte Overexpression from PMID: 30772301 | SOX2 |
| CDK12    | SOX2 regulated genes in Keratinocyte Overexpression from PMID: 30772301 | SOX2 |
| CCDC60   | SOX2 regulated genes in Keratinocyte Overexpression from PMID: 30772301 | SOX2 |
| DAPK2    | SOX2 regulated genes in Keratinocyte Overexpression from PMID: 30772301 | SOX2 |
| LAS1L    | SOX2 regulated genes in Keratinocyte Overexpression from PMID: 30772301 | SOX2 |
| DCTD     | SOX2 regulated genes in Keratinocyte Overexpression from PMID: 30772301 | SOX2 |
| PCYOX1L  | SOX2 regulated genes in Keratinocyte Overexpression from PMID: 30772301 | SOX2 |





|          |                                                                         |      |
|----------|-------------------------------------------------------------------------|------|
| FAAP100  | SOX2 regulated genes in Keratinocyte Overexpression from PMID: 30772301 | SOX2 |
| JAKMIP2  | SOX2 regulated genes in Keratinocyte Overexpression from PMID: 30772301 | SOX2 |
| DMTF1    | SOX2 regulated genes in Keratinocyte Overexpression from PMID: 30772301 | SOX2 |
| NDOR1    | SOX2 regulated genes in Keratinocyte Overexpression from PMID: 30772301 | SOX2 |
| UBE3D    | SOX2 regulated genes in Keratinocyte Overexpression from PMID: 30772301 | SOX2 |
| ANAPC1   | SOX2 regulated genes in Keratinocyte Overexpression from PMID: 30772301 | SOX2 |
| CALML3   | SOX2 regulated genes in Keratinocyte Overexpression from PMID: 30772301 | SOX2 |
| HSPA8    | SOX2 regulated genes in Keratinocyte Overexpression from PMID: 30772301 | SOX2 |
| SF3B5    | SOX2 regulated genes in Keratinocyte Overexpression from PMID: 30772301 | SOX2 |
| FOSL2    | SOX2 regulated genes in Keratinocyte Overexpression from PMID: 30772301 | SOX2 |
| MREG     | SOX2 regulated genes in Keratinocyte Overexpression from PMID: 30772301 | SOX2 |
| DNPH1    | SOX2 regulated genes in Keratinocyte Overexpression from PMID: 30772301 | SOX2 |
| GPC2     | SOX2 regulated genes in Keratinocyte Overexpression from PMID: 30772301 | SOX2 |
| MTMR2    | SOX2 regulated genes in Keratinocyte Overexpression from PMID: 30772301 | SOX2 |
| TOP2A    | SOX2 regulated genes in Keratinocyte Overexpression from PMID: 30772301 | SOX2 |
| WDR70    | SOX2 regulated genes in Keratinocyte Overexpression from PMID: 30772301 | SOX2 |
| PEX6     | SOX2 regulated genes in Keratinocyte Overexpression from PMID: 30772301 | SOX2 |
| ADAT2    | SOX2 regulated genes in Keratinocyte Overexpression from PMID: 30772301 | SOX2 |
| LYPD5    | SOX2 regulated genes in Keratinocyte Overexpression from PMID: 30772301 | SOX2 |
| PTPN1    | SOX2 regulated genes in Keratinocyte Overexpression from PMID: 30772301 | SOX2 |
| C10orf95 | SOX2 regulated genes in Keratinocyte Overexpression from PMID: 30772301 | SOX2 |
| TNKS1BP1 | SOX2 regulated genes in Keratinocyte Overexpression from PMID: 30772301 | SOX2 |
| SLC22A23 | SOX2 regulated genes in Keratinocyte Overexpression from PMID: 30772301 | SOX2 |
| CACFD1   | SOX2 regulated genes in Keratinocyte Overexpression from PMID: 30772301 | SOX2 |
| SUGP1    | SOX2 regulated genes in Keratinocyte Overexpression from PMID: 30772301 | SOX2 |
| ZNF786   | SOX2 regulated genes in Keratinocyte Overexpression from PMID: 30772301 | SOX2 |
| EHD1     | SOX2 regulated genes in Keratinocyte Overexpression from PMID: 30772301 | SOX2 |
| ARG1     | SOX2 regulated genes in Keratinocyte Overexpression from PMID: 30772301 | SOX2 |
| WNT10B   | SOX2 regulated genes in Keratinocyte Overexpression from PMID: 30772301 | SOX2 |
| LIG1     | SOX2 regulated genes in Keratinocyte Overexpression from PMID: 30772301 | SOX2 |
| HILPDA   | SOX2 regulated genes in Keratinocyte Overexpression from PMID: 30772301 | SOX2 |
| RABGAP1  | SOX2 regulated genes in Keratinocyte Overexpression from PMID: 30772301 | SOX2 |
| EDAR     | SOX2 regulated genes in Keratinocyte Overexpression from PMID: 30772301 | SOX2 |
| HADHA    | SOX2 regulated genes in Keratinocyte Overexpression from PMID: 30772301 | SOX2 |
| ADM      | SOX2 regulated genes in Keratinocyte Overexpression from PMID: 30772301 | SOX2 |
| TMCO3    | SOX2 regulated genes in Keratinocyte Overexpression from PMID: 30772301 | SOX2 |
| HNF4G    | SOX2 regulated genes in Keratinocyte Overexpression from PMID: 30772301 | SOX2 |
| SNIP1    | SOX2 regulated genes in Keratinocyte Overexpression from PMID: 30772301 | SOX2 |
| KBTBD6   | SOX2 regulated genes in Keratinocyte Overexpression from PMID: 30772301 | SOX2 |
| KBTBD7   | SOX2 regulated genes in Keratinocyte Overexpression from PMID: 30772301 | SOX2 |
| PAX1     | SOX2 regulated genes in Keratinocyte Overexpression from PMID: 30772301 | SOX2 |
| TOMM6    | SOX2 regulated genes in Keratinocyte Overexpression from PMID: 30772301 | SOX2 |
| ATP10B   | SOX2 regulated genes in Keratinocyte Overexpression from PMID: 30772301 | SOX2 |
| KAT5     | SOX2 regulated genes in Keratinocyte Overexpression from PMID: 30772301 | SOX2 |
| MTERF4   | SOX2 regulated genes in Keratinocyte Overexpression from PMID: 30772301 | SOX2 |
| MAP3K15  | SOX2 regulated genes in Keratinocyte Overexpression from PMID: 30772301 | SOX2 |
| NIPAL1   | SOX2 regulated genes in Keratinocyte Overexpression from PMID: 30772301 | SOX2 |
| PUS10    | SOX2 regulated genes in Keratinocyte Overexpression from PMID: 30772301 | SOX2 |
| ANAPC5   | SOX2 regulated genes in Keratinocyte Overexpression from PMID: 30772301 | SOX2 |
| RDH10    | SOX2 regulated genes in Keratinocyte Overexpression from PMID: 30772301 | SOX2 |
| NOP14    | SOX2 regulated genes in Keratinocyte Overexpression from PMID: 30772301 | SOX2 |
| SPATA20  | SOX2 regulated genes in Keratinocyte Overexpression from PMID: 30772301 | SOX2 |
| TACSTD2  | SOX2 regulated genes in Keratinocyte Overexpression from PMID: 30772301 | SOX2 |
| MED29    | SOX2 regulated genes in Keratinocyte Overexpression from PMID: 30772301 | SOX2 |
| DMAP1    | SOX2 regulated genes in Keratinocyte Overexpression from PMID: 30772301 | SOX2 |
| JOSD2    | SOX2 regulated genes in Keratinocyte Overexpression from PMID: 30772301 | SOX2 |
| TMPRSS13 | SOX2 regulated genes in Keratinocyte Overexpression from PMID: 30772301 | SOX2 |
| KIF26A   | SOX2 regulated genes in Keratinocyte Overexpression from PMID: 30772301 | SOX2 |
| TRPV6    | SOX2 regulated genes in Keratinocyte Overexpression from PMID: 30772301 | SOX2 |

|          |                                                                         |      |
|----------|-------------------------------------------------------------------------|------|
| CDKN3    | SOX2 regulated genes in Keratinocyte Overexpression from PMID: 30772301 | SOX2 |
| TLL10    | SOX2 regulated genes in Keratinocyte Overexpression from PMID: 30772301 | SOX2 |
| RTN4IP1  | SOX2 regulated genes in Keratinocyte Overexpression from PMID: 30772301 | SOX2 |
| TMEM35A  | SOX2 regulated genes in Keratinocyte Overexpression from PMID: 30772301 | SOX2 |
| TRIB1    | SOX2 regulated genes in Keratinocyte Overexpression from PMID: 30772301 | SOX2 |
| IZUMO1   | SOX2 regulated genes in Keratinocyte Overexpression from PMID: 30772301 | SOX2 |
| TMEM134  | SOX2 regulated genes in Keratinocyte Overexpression from PMID: 30772301 | SOX2 |
| ABC8     | SOX2 regulated genes in Keratinocyte Overexpression from PMID: 30772301 | SOX2 |
| YEATS4   | SOX2 regulated genes in Keratinocyte Overexpression from PMID: 30772301 | SOX2 |
| RAD54B   | SOX2 regulated genes in Keratinocyte Overexpression from PMID: 30772301 | SOX2 |
| SCUBE1   | SOX2 regulated genes in Keratinocyte Overexpression from PMID: 30772301 | SOX2 |
| OGDHL    | SOX2 regulated genes in Keratinocyte Overexpression from PMID: 30772301 | SOX2 |
| SCNN1G   | SOX2 regulated genes in Keratinocyte Overexpression from PMID: 30772301 | SOX2 |
| CEBPB    | SOX2 regulated genes in Keratinocyte Overexpression from PMID: 30772301 | SOX2 |
| RAD51C   | SOX2 regulated genes in Keratinocyte Overexpression from PMID: 30772301 | SOX2 |
| SERPINA1 | SOX2 regulated genes in Keratinocyte Overexpression from PMID: 30772301 | SOX2 |
| NIPAL2   | SOX2 regulated genes in Keratinocyte Overexpression from PMID: 30772301 | SOX2 |
| PTPRK    | SOX2 regulated genes in Keratinocyte Overexpression from PMID: 30772301 | SOX2 |
| B3GNT4   | SOX2 regulated genes in Keratinocyte Overexpression from PMID: 30772301 | SOX2 |
| ALDH3A2  | SOX2 regulated genes in Keratinocyte Overexpression from PMID: 30772301 | SOX2 |
| KITLG    | SOX2 regulated genes in Keratinocyte Overexpression from PMID: 30772301 | SOX2 |
| PRRC2B   | SOX2 regulated genes in Keratinocyte Overexpression from PMID: 30772301 | SOX2 |
| HAT1     | SOX2 regulated genes in Keratinocyte Overexpression from PMID: 30772301 | SOX2 |
| NDST1    | SOX2 regulated genes in Keratinocyte Overexpression from PMID: 30772301 | SOX2 |
| SLC25A13 | SOX2 regulated genes in Keratinocyte Overexpression from PMID: 30772301 | SOX2 |
| FAM102A  | SOX2 regulated genes in Keratinocyte Overexpression from PMID: 30772301 | SOX2 |
| CCND2    | SOX2 regulated genes in Keratinocyte Overexpression from PMID: 30772301 | SOX2 |
| PAFAH1B2 | SOX2 regulated genes in Keratinocyte Overexpression from PMID: 30772301 | SOX2 |
| UBE2E3   | SOX2 regulated genes in Keratinocyte Overexpression from PMID: 30772301 | SOX2 |
| ZNF169   | SOX2 regulated genes in Keratinocyte Overexpression from PMID: 30772301 | SOX2 |
| SLC4A2   | SOX2 regulated genes in Keratinocyte Overexpression from PMID: 30772301 | SOX2 |
| SLC22A1  | SOX2 regulated genes in Keratinocyte Overexpression from PMID: 30772301 | SOX2 |
| SFRP1    | SOX2 regulated genes in Keratinocyte Overexpression from PMID: 30772301 | SOX2 |
| E2F5     | SOX2 regulated genes in Keratinocyte Overexpression from PMID: 30772301 | SOX2 |
| CHRM5    | SOX2 regulated genes in Keratinocyte Overexpression from PMID: 30772301 | SOX2 |
| GTF3C1   | SOX2 regulated genes in Keratinocyte Overexpression from PMID: 30772301 | SOX2 |
| NXT1     | SOX2 regulated genes in Keratinocyte Overexpression from PMID: 30772301 | SOX2 |
| TULP1    | SOX2 regulated genes in Keratinocyte Overexpression from PMID: 30772301 | SOX2 |
| EPHB6    | SOX2 regulated genes in Keratinocyte Overexpression from PMID: 30772301 | SOX2 |
| ATOH8    | SOX2 regulated genes in Keratinocyte Overexpression from PMID: 30772301 | SOX2 |
| HAUS5    | SOX2 regulated genes in Keratinocyte Overexpression from PMID: 30772301 | SOX2 |
| RABGEF1  | SOX2 regulated genes in Keratinocyte Overexpression from PMID: 30772301 | SOX2 |
| ZMYM2    | SOX2 regulated genes in Keratinocyte Overexpression from PMID: 30772301 | SOX2 |
| STBD1    | SOX2 regulated genes in Keratinocyte Overexpression from PMID: 30772301 | SOX2 |
| ZDHHC6   | SOX2 regulated genes in Keratinocyte Overexpression from PMID: 30772301 | SOX2 |
| MAD2L1BP | SOX2 regulated genes in Keratinocyte Overexpression from PMID: 30772301 | SOX2 |
| PSMB2    | SOX2 regulated genes in Keratinocyte Overexpression from PMID: 30772301 | SOX2 |
| DDX51    | SOX2 regulated genes in Keratinocyte Overexpression from PMID: 30772301 | SOX2 |
| MED7     | SOX2 regulated genes in Keratinocyte Overexpression from PMID: 30772301 | SOX2 |
| NECTIN3  | SOX2 regulated genes in Keratinocyte Overexpression from PMID: 30772301 | SOX2 |
| KRT6A    | SOX2 regulated genes in Keratinocyte Overexpression from PMID: 30772301 | SOX2 |
| CNOT6    | SOX2 regulated genes in Keratinocyte Overexpression from PMID: 30772301 | SOX2 |
| ZBTB39   | SOX2 regulated genes in Keratinocyte Overexpression from PMID: 30772301 | SOX2 |
| STAG2    | SOX2 regulated genes in Keratinocyte Overexpression from PMID: 30772301 | SOX2 |
| ZSCAN25  | SOX2 regulated genes in Keratinocyte Overexpression from PMID: 30772301 | SOX2 |
| RHOG     | SOX2 regulated genes in Keratinocyte Overexpression from PMID: 30772301 | SOX2 |
| CYP4F12  | SOX2 regulated genes in Keratinocyte Overexpression from PMID: 30772301 | SOX2 |
| KAT2B    | SOX2 regulated genes in Keratinocyte Overexpression from PMID: 30772301 | SOX2 |
| ANAPC2   | SOX2 regulated genes in Keratinocyte Overexpression from PMID: 30772301 | SOX2 |





|          |                                                                         |      |
|----------|-------------------------------------------------------------------------|------|
| NUP98    | SOX2 regulated genes in Keratinocyte Overexpression from PMID: 30772301 | SOX2 |
| TMEM121  | SOX2 regulated genes in Keratinocyte Overexpression from PMID: 30772301 | SOX2 |
| GJB4     | SOX2 regulated genes in Keratinocyte Overexpression from PMID: 30772301 | SOX2 |
| RPL37    | SOX2 regulated genes in Keratinocyte Overexpression from PMID: 30772301 | SOX2 |
| MAP9     | SOX2 regulated genes in Keratinocyte Overexpression from PMID: 30772301 | SOX2 |
| MTTP     | SOX2 regulated genes in Keratinocyte Overexpression from PMID: 30772301 | SOX2 |
| IQCK     | SOX2 regulated genes in Keratinocyte Overexpression from PMID: 30772301 | SOX2 |
| PPP2R5D  | SOX2 regulated genes in Keratinocyte Overexpression from PMID: 30772301 | SOX2 |
| NUP37    | SOX2 regulated genes in Keratinocyte Overexpression from PMID: 30772301 | SOX2 |
| MLLT10   | SOX2 regulated genes in Keratinocyte Overexpression from PMID: 30772301 | SOX2 |
| FNTB     | SOX2 regulated genes in Keratinocyte Overexpression from PMID: 30772301 | SOX2 |
| PPP1R15A | SOX2 regulated genes in Keratinocyte Overexpression from PMID: 30772301 | SOX2 |
| PNPLA1   | SOX2 regulated genes in Keratinocyte Overexpression from PMID: 30772301 | SOX2 |
| RPL22L1  | SOX2 regulated genes in Keratinocyte Overexpression from PMID: 30772301 | SOX2 |
| NRN1L    | SOX2 regulated genes in Keratinocyte Overexpression from PMID: 30772301 | SOX2 |
| EEFSEC   | SOX2 regulated genes in Keratinocyte Overexpression from PMID: 30772301 | SOX2 |
| PPID     | SOX2 regulated genes in Keratinocyte Overexpression from PMID: 30772301 | SOX2 |
| ARMC10   | SOX2 regulated genes in Keratinocyte Overexpression from PMID: 30772301 | SOX2 |
| ZBTB45   | SOX2 regulated genes in Keratinocyte Overexpression from PMID: 30772301 | SOX2 |
| NXPE2    | SOX2 regulated genes in Keratinocyte Overexpression from PMID: 30772301 | SOX2 |
| PSMD14   | SOX2 regulated genes in Keratinocyte Overexpression from PMID: 30772301 | SOX2 |
| KIF20B   | SOX2 regulated genes in Keratinocyte Overexpression from PMID: 30772301 | SOX2 |
| TMEM161A | SOX2 regulated genes in Keratinocyte Overexpression from PMID: 30772301 | SOX2 |
| CCDC112  | SOX2 regulated genes in Keratinocyte Overexpression from PMID: 30772301 | SOX2 |
| PRRG3    | SOX2 regulated genes in Keratinocyte Overexpression from PMID: 30772301 | SOX2 |
| PUS3     | SOX2 regulated genes in Keratinocyte Overexpression from PMID: 30772301 | SOX2 |
| SYNE2    | SOX2 regulated genes in Keratinocyte Overexpression from PMID: 30772301 | SOX2 |
| ZBTB12   | SOX2 regulated genes in Keratinocyte Overexpression from PMID: 30772301 | SOX2 |
| REXO4    | SOX2 regulated genes in Keratinocyte Overexpression from PMID: 30772301 | SOX2 |
| WDR31    | SOX2 regulated genes in Keratinocyte Overexpression from PMID: 30772301 | SOX2 |
| AP1S3    | SOX2 regulated genes in Keratinocyte Overexpression from PMID: 30772301 | SOX2 |
| GTF3C5   | SOX2 regulated genes in Keratinocyte Overexpression from PMID: 30772301 | SOX2 |
| PTK2     | SOX2 regulated genes in Keratinocyte Overexpression from PMID: 30772301 | SOX2 |
| LRFN1    | SOX2 regulated genes in Keratinocyte Overexpression from PMID: 30772301 | SOX2 |
| CCNC     | SOX2 regulated genes in Keratinocyte Overexpression from PMID: 30772301 | SOX2 |
| PLA2G12A | SOX2 regulated genes in Keratinocyte Overexpression from PMID: 30772301 | SOX2 |
| ARID1B   | SOX2 regulated genes in Keratinocyte Overexpression from PMID: 30772301 | SOX2 |
| SOCS5    | SOX2 regulated genes in Keratinocyte Overexpression from PMID: 30772301 | SOX2 |
| FANCA    | SOX2 regulated genes in Keratinocyte Overexpression from PMID: 30772301 | SOX2 |
| NAXD     | SOX2 regulated genes in Keratinocyte Overexpression from PMID: 30772301 | SOX2 |
| CLIC3    | SOX2 regulated genes in Keratinocyte Overexpression from PMID: 30772301 | SOX2 |
| ABHD10   | SOX2 regulated genes in Keratinocyte Overexpression from PMID: 30772301 | SOX2 |
| INSM2    | SOX2 regulated genes in Keratinocyte Overexpression from PMID: 30772301 | SOX2 |
| MYCBPAP  | SOX2 regulated genes in Keratinocyte Overexpression from PMID: 30772301 | SOX2 |
| TEAD3    | SOX2 regulated genes in Keratinocyte Overexpression from PMID: 30772301 | SOX2 |
| PTK2B    | SOX2 regulated genes in Keratinocyte Overexpression from PMID: 30772301 | SOX2 |
| TCF7L1   | SOX2 regulated genes in Keratinocyte Overexpression from PMID: 30772301 | SOX2 |
| CBX1     | SOX2 regulated genes in Keratinocyte Overexpression from PMID: 30772301 | SOX2 |
| MDGA1    | SOX2 regulated genes in Keratinocyte Overexpression from PMID: 30772301 | SOX2 |
| CLDND1   | SOX2 regulated genes in Keratinocyte Overexpression from PMID: 30772301 | SOX2 |
| CENPH    | SOX2 regulated genes in Keratinocyte Overexpression from PMID: 30772301 | SOX2 |
| PLEKHF2  | SOX2 regulated genes in Keratinocyte Overexpression from PMID: 30772301 | SOX2 |
| DNAJB13  | SOX2 regulated genes in Keratinocyte Overexpression from PMID: 30772301 | SOX2 |
| LUC7L3   | SOX2 regulated genes in Keratinocyte Overexpression from PMID: 30772301 | SOX2 |
| ARHGEF1  | SOX2 regulated genes in Keratinocyte Overexpression from PMID: 30772301 | SOX2 |
| PLOD2    | SOX2 regulated genes in Keratinocyte Overexpression from PMID: 30772301 | SOX2 |
| NPRL2    | SOX2 regulated genes in Keratinocyte Overexpression from PMID: 30772301 | SOX2 |
| METTL2B  | SOX2 regulated genes in Keratinocyte Overexpression from PMID: 30772301 | SOX2 |
| TUBE1    | SOX2 regulated genes in Keratinocyte Overexpression from PMID: 30772301 | SOX2 |

|           |                                                                         |      |
|-----------|-------------------------------------------------------------------------|------|
| C1QTNF12  | SOX2 regulated genes in Keratinocyte Overexpression from PMID: 30772301 | SOX2 |
| BORCS8    | SOX2 regulated genes in Keratinocyte Overexpression from PMID: 30772301 | SOX2 |
| SLCO4C1   | SOX2 regulated genes in Keratinocyte Overexpression from PMID: 30772301 | SOX2 |
| LIG4      | SOX2 regulated genes in Keratinocyte Overexpression from PMID: 30772301 | SOX2 |
| MEPCE     | SOX2 regulated genes in Keratinocyte Overexpression from PMID: 30772301 | SOX2 |
| CYFIP2    | SOX2 regulated genes in Keratinocyte Overexpression from PMID: 30772301 | SOX2 |
| CD151     | SOX2 regulated genes in Keratinocyte Overexpression from PMID: 30772301 | SOX2 |
| LYRM4     | SOX2 regulated genes in Keratinocyte Overexpression from PMID: 30772301 | SOX2 |
| TP53I11   | SOX2 regulated genes in Keratinocyte Overexpression from PMID: 30772301 | SOX2 |
| CTBP1     | SOX2 regulated genes in Keratinocyte Overexpression from PMID: 30772301 | SOX2 |
| ARL6      | SOX2 regulated genes in Keratinocyte Overexpression from PMID: 30772301 | SOX2 |
| LRWD1     | SOX2 regulated genes in Keratinocyte Overexpression from PMID: 30772301 | SOX2 |
| HDHD3     | SOX2 regulated genes in Keratinocyte Overexpression from PMID: 30772301 | SOX2 |
| ZC3HAV1L  | SOX2 regulated genes in Keratinocyte Overexpression from PMID: 30772301 | SOX2 |
| STAM      | SOX2 regulated genes in Keratinocyte Overexpression from PMID: 30772301 | SOX2 |
| URI1      | SOX2 regulated genes in Keratinocyte Overexpression from PMID: 30772301 | SOX2 |
| MRPL2     | SOX2 regulated genes in Keratinocyte Overexpression from PMID: 30772301 | SOX2 |
| GABARAPL2 | SOX2 regulated genes in Keratinocyte Overexpression from PMID: 30772301 | SOX2 |
| RARG      | SOX2 regulated genes in Keratinocyte Overexpression from PMID: 30772301 | SOX2 |
| NXF1      | SOX2 regulated genes in Keratinocyte Overexpression from PMID: 30772301 | SOX2 |
| VWA7      | SOX2 regulated genes in Keratinocyte Overexpression from PMID: 30772301 | SOX2 |
| BBS12     | SOX2 regulated genes in Keratinocyte Overexpression from PMID: 30772301 | SOX2 |
| SESN2     | SOX2 regulated genes in Keratinocyte Overexpression from PMID: 30772301 | SOX2 |
| PYURF     | SOX2 regulated genes in Keratinocyte Overexpression from PMID: 30772301 | SOX2 |
| FAM166A   | SOX2 regulated genes in Keratinocyte Overexpression from PMID: 30772301 | SOX2 |
| GLB1L2    | SOX2 regulated genes in Keratinocyte Overexpression from PMID: 30772301 | SOX2 |
| PSMC2     | SOX2 regulated genes in Keratinocyte Overexpression from PMID: 30772301 | SOX2 |
| NSMCE4A   | SOX2 regulated genes in Keratinocyte Overexpression from PMID: 30772301 | SOX2 |
| CLUAP1    | SOX2 regulated genes in Keratinocyte Overexpression from PMID: 30772301 | SOX2 |
| JMJD7     | SOX2 regulated genes in Keratinocyte Overexpression from PMID: 30772301 | SOX2 |
| CDC42BPG  | SOX2 regulated genes in Keratinocyte Overexpression from PMID: 30772301 | SOX2 |
| MEA1      | SOX2 regulated genes in Keratinocyte Overexpression from PMID: 30772301 | SOX2 |
| CDK17     | SOX2 regulated genes in Keratinocyte Overexpression from PMID: 30772301 | SOX2 |
| ATAD5     | SOX2 regulated genes in Keratinocyte Overexpression from PMID: 30772301 | SOX2 |
| DDX19B    | SOX2 regulated genes in Keratinocyte Overexpression from PMID: 30772301 | SOX2 |
| CCDC189   | SOX2 regulated genes in Keratinocyte Overexpression from PMID: 30772301 | SOX2 |
| ADAMTS13  | SOX2 regulated genes in Keratinocyte Overexpression from PMID: 30772301 | SOX2 |
| EMC4      | SOX2 regulated genes in Keratinocyte Overexpression from PMID: 30772301 | SOX2 |
| ZNF597    | SOX2 regulated genes in Keratinocyte Overexpression from PMID: 30772301 | SOX2 |
| CEP131    | SOX2 regulated genes in Keratinocyte Overexpression from PMID: 30772301 | SOX2 |
| KLHL2     | SOX2 regulated genes in Keratinocyte Overexpression from PMID: 30772301 | SOX2 |
| FRA10AC1  | SOX2 regulated genes in Keratinocyte Overexpression from PMID: 30772301 | SOX2 |
| RPS6KA3   | SOX2 regulated genes in Keratinocyte Overexpression from PMID: 30772301 | SOX2 |
| PSMA3     | SOX2 regulated genes in Keratinocyte Overexpression from PMID: 30772301 | SOX2 |
| CDC26     | SOX2 regulated genes in Keratinocyte Overexpression from PMID: 30772301 | SOX2 |
| SPSB3     | SOX2 regulated genes in Keratinocyte Overexpression from PMID: 30772301 | SOX2 |
| GPATCH1   | SOX2 regulated genes in Keratinocyte Overexpression from PMID: 30772301 | SOX2 |
| TPO       | SOX2 regulated genes in Keratinocyte Overexpression from PMID: 30772301 | SOX2 |
| RUFY3     | SOX2 regulated genes in Keratinocyte Overexpression from PMID: 30772301 | SOX2 |
| PRPF4     | SOX2 regulated genes in Keratinocyte Overexpression from PMID: 30772301 | SOX2 |
| STRN      | SOX2 regulated genes in Keratinocyte Overexpression from PMID: 30772301 | SOX2 |
| LMNTD2    | SOX2 regulated genes in Keratinocyte Overexpression from PMID: 30772301 | SOX2 |
| NCAPG2    | SOX2 regulated genes in Keratinocyte Overexpression from PMID: 30772301 | SOX2 |
| CEP170B   | SOX2 regulated genes in Keratinocyte Overexpression from PMID: 30772301 | SOX2 |
| XPO5      | SOX2 regulated genes in Keratinocyte Overexpression from PMID: 30772301 | SOX2 |
| BOK       | SOX2 regulated genes in Keratinocyte Overexpression from PMID: 30772301 | SOX2 |
| UTP20     | SOX2 regulated genes in Keratinocyte Overexpression from PMID: 30772301 | SOX2 |
| CRYBB3    | SOX2 regulated genes in Keratinocyte Overexpression from PMID: 30772301 | SOX2 |
| ARF5      | SOX2 regulated genes in Keratinocyte Overexpression from PMID: 30772301 | SOX2 |





|          |                                                                         |      |
|----------|-------------------------------------------------------------------------|------|
| DNAAF2   | SOX2 regulated genes in Keratinocyte Overexpression from PMID: 30772301 | SOX2 |
| BRIX1    | SOX2 regulated genes in Keratinocyte Overexpression from PMID: 30772301 | SOX2 |
| PAF1     | SOX2 regulated genes in Keratinocyte Overexpression from PMID: 30772301 | SOX2 |
| BFSP2    | SOX2 regulated genes in Keratinocyte Overexpression from PMID: 30772301 | SOX2 |
| PPP1R36  | SOX2 regulated genes in Keratinocyte Overexpression from PMID: 30772301 | SOX2 |
| ARMC1    | SOX2 regulated genes in Keratinocyte Overexpression from PMID: 30772301 | SOX2 |
| C11orf52 | SOX2 regulated genes in Keratinocyte Overexpression from PMID: 30772301 | SOX2 |
| CEMIP    | SOX2 regulated genes in Keratinocyte Overexpression from PMID: 30772301 | SOX2 |
| CPEB4    | SOX2 regulated genes in Keratinocyte Overexpression from PMID: 30772301 | SOX2 |
| ZNF593   | SOX2 regulated genes in Keratinocyte Overexpression from PMID: 30772301 | SOX2 |
| PRSS8    | SOX2 regulated genes in Keratinocyte Overexpression from PMID: 30772301 | SOX2 |
| HDAC11   | SOX2 regulated genes in Keratinocyte Overexpression from PMID: 30772301 | SOX2 |
| PHF14    | SOX2 regulated genes in Keratinocyte Overexpression from PMID: 30772301 | SOX2 |
| CETN2    | SOX2 regulated genes in Keratinocyte Overexpression from PMID: 30772301 | SOX2 |
| TBRG1    | SOX2 regulated genes in Keratinocyte Overexpression from PMID: 30772301 | SOX2 |
| ERCC3    | SOX2 regulated genes in Keratinocyte Overexpression from PMID: 30772301 | SOX2 |
| CDK5     | SOX2 regulated genes in Keratinocyte Overexpression from PMID: 30772301 | SOX2 |
| EYA3     | SOX2 regulated genes in Keratinocyte Overexpression from PMID: 30772301 | SOX2 |
| CAMTA1   | SOX2 regulated genes in Keratinocyte Overexpression from PMID: 30772301 | SOX2 |
| POP7     | SOX2 regulated genes in Keratinocyte Overexpression from PMID: 30772301 | SOX2 |
| HNRNPLL  | SOX2 regulated genes in Keratinocyte Overexpression from PMID: 30772301 | SOX2 |
| ZFP92    | SOX2 regulated genes in Keratinocyte Overexpression from PMID: 30772301 | SOX2 |
| TMEM63B  | SOX2 regulated genes in Keratinocyte Overexpression from PMID: 30772301 | SOX2 |
| ZNF473   | SOX2 regulated genes in Keratinocyte Overexpression from PMID: 30772301 | SOX2 |
| TNFAIP8  | SOX2 regulated genes in Keratinocyte Overexpression from PMID: 30772301 | SOX2 |
| NLN      | SOX2 regulated genes in Keratinocyte Overexpression from PMID: 30772301 | SOX2 |
| CNGA1    | SOX2 regulated genes in Keratinocyte Overexpression from PMID: 30772301 | SOX2 |
| LDB1     | SOX2 regulated genes in Keratinocyte Overexpression from PMID: 30772301 | SOX2 |
| UBAP1    | SOX2 regulated genes in Keratinocyte Overexpression from PMID: 30772301 | SOX2 |
| TFAP4    | SOX2 regulated genes in Keratinocyte Overexpression from PMID: 30772301 | SOX2 |
| YTHDC1   | SOX2 regulated genes in Keratinocyte Overexpression from PMID: 30772301 | SOX2 |
| SIAH2    | SOX2 regulated genes in Keratinocyte Overexpression from PMID: 30772301 | SOX2 |
| PLS3     | SOX2 regulated genes in Keratinocyte Overexpression from PMID: 30772301 | SOX2 |
| LZTR1    | SOX2 regulated genes in Keratinocyte Overexpression from PMID: 30772301 | SOX2 |
| ZNF827   | SOX2 regulated genes in Keratinocyte Overexpression from PMID: 30772301 | SOX2 |
| NAP1L1   | SOX2 regulated genes in Keratinocyte Overexpression from PMID: 30772301 | SOX2 |
| CRISPLD1 | SOX2 regulated genes in Keratinocyte Overexpression from PMID: 30772301 | SOX2 |
| EIF3F    | SOX2 regulated genes in Keratinocyte Overexpression from PMID: 30772301 | SOX2 |
| KIF23    | SOX2 regulated genes in Keratinocyte Overexpression from PMID: 30772301 | SOX2 |
| RRP36    | SOX2 regulated genes in Keratinocyte Overexpression from PMID: 30772301 | SOX2 |
| TRIM31   | SOX2 regulated genes in Keratinocyte Overexpression from PMID: 30772301 | SOX2 |
| TAF6L    | SOX2 regulated genes in Keratinocyte Overexpression from PMID: 30772301 | SOX2 |
| ITGB6    | SOX2 regulated genes in Keratinocyte Overexpression from PMID: 30772301 | SOX2 |
| ARMCX5   | SOX2 regulated genes in Keratinocyte Overexpression from PMID: 30772301 | SOX2 |
| BTBD11   | SOX2 regulated genes in Keratinocyte Overexpression from PMID: 30772301 | SOX2 |
| EIF1AD   | SOX2 regulated genes in Keratinocyte Overexpression from PMID: 30772301 | SOX2 |
| ACRBP    | SOX2 regulated genes in Keratinocyte Overexpression from PMID: 30772301 | SOX2 |
| METTL3   | SOX2 regulated genes in Keratinocyte Overexpression from PMID: 30772301 | SOX2 |
| IGF2BP1  | SOX2 regulated genes in Keratinocyte Overexpression from PMID: 30772301 | SOX2 |
| GPR176   | SOX2 regulated genes in Keratinocyte Overexpression from PMID: 30772301 | SOX2 |
| PDZD4    | SOX2 regulated genes in Keratinocyte Overexpression from PMID: 30772301 | SOX2 |
| TRMO     | SOX2 regulated genes in Keratinocyte Overexpression from PMID: 30772301 | SOX2 |
| KDM4B    | SOX2 regulated genes in Keratinocyte Overexpression from PMID: 30772301 | SOX2 |
| FAIM2    | SOX2 regulated genes in Keratinocyte Overexpression from PMID: 30772301 | SOX2 |
| DMGDH    | SOX2 regulated genes in Keratinocyte Overexpression from PMID: 30772301 | SOX2 |
| ZNF101   | SOX2 regulated genes in Keratinocyte Overexpression from PMID: 30772301 | SOX2 |
| MT4      | SOX2 regulated genes in Keratinocyte Overexpression from PMID: 30772301 | SOX2 |
| ATXN2    | SOX2 regulated genes in Keratinocyte Overexpression from PMID: 30772301 | SOX2 |
| XRCC2    | SOX2 regulated genes in Keratinocyte Overexpression from PMID: 30772301 | SOX2 |



|          |                                                                         |      |
|----------|-------------------------------------------------------------------------|------|
| POLD2    | SOX2 regulated genes in Keratinocyte Overexpression from PMID: 30772301 | SOX2 |
| ZNF740   | SOX2 regulated genes in Keratinocyte Overexpression from PMID: 30772301 | SOX2 |
| NIPBL    | SOX2 regulated genes in Keratinocyte Overexpression from PMID: 30772301 | SOX2 |
| CPA4     | SOX2 regulated genes in Keratinocyte Overexpression from PMID: 30772301 | SOX2 |
| SNAI2    | SOX2 regulated genes in Keratinocyte Overexpression from PMID: 30772301 | SOX2 |
| SMYD4    | SOX2 regulated genes in Keratinocyte Overexpression from PMID: 30772301 | SOX2 |
| CDPF1    | SOX2 regulated genes in Keratinocyte Overexpression from PMID: 30772301 | SOX2 |
| DNAJB6   | SOX2 regulated genes in Keratinocyte Overexpression from PMID: 30772301 | SOX2 |
| DCAF10   | SOX2 regulated genes in Keratinocyte Overexpression from PMID: 30772301 | SOX2 |
| CLSPN    | SOX2 regulated genes in Keratinocyte Overexpression from PMID: 30772301 | SOX2 |
| CFDP1    | SOX2 regulated genes in Keratinocyte Overexpression from PMID: 30772301 | SOX2 |
| EYA1     | SOX2 regulated genes in Keratinocyte Overexpression from PMID: 30772301 | SOX2 |
| UBN1     | SOX2 regulated genes in Keratinocyte Overexpression from PMID: 30772301 | SOX2 |
| ATXN7L3B | SOX2 regulated genes in Keratinocyte Overexpression from PMID: 30772301 | SOX2 |
| GALNT6   | SOX2 regulated genes in Keratinocyte Overexpression from PMID: 30772301 | SOX2 |
| TTC23    | SOX2 regulated genes in Keratinocyte Overexpression from PMID: 30772301 | SOX2 |
| TCP11L2  | SOX2 regulated genes in Keratinocyte Overexpression from PMID: 30772301 | SOX2 |
| CHCHD4   | SOX2 regulated genes in Keratinocyte Overexpression from PMID: 30772301 | SOX2 |
| CEP89    | SOX2 regulated genes in Keratinocyte Overexpression from PMID: 30772301 | SOX2 |
| FBXW8    | SOX2 regulated genes in Keratinocyte Overexpression from PMID: 30772301 | SOX2 |
| DMRTA2   | SOX2 regulated genes in Keratinocyte Overexpression from PMID: 30772301 | SOX2 |
| KAT7     | SOX2 regulated genes in Keratinocyte Overexpression from PMID: 30772301 | SOX2 |
| NCAPH2   | SOX2 regulated genes in Keratinocyte Overexpression from PMID: 30772301 | SOX2 |
| PPP2R1A  | SOX2 regulated genes in Keratinocyte Overexpression from PMID: 30772301 | SOX2 |
| SAFB2    | SOX2 regulated genes in Keratinocyte Overexpression from PMID: 30772301 | SOX2 |
| IGF2R    | SOX2 regulated genes in Keratinocyte Overexpression from PMID: 30772301 | SOX2 |
| AOC2     | SOX2 regulated genes in Keratinocyte Overexpression from PMID: 30772301 | SOX2 |
| EXOSC9   | SOX2 regulated genes in Keratinocyte Overexpression from PMID: 30772301 | SOX2 |
| IGSF11   | SOX2 regulated genes in Keratinocyte Overexpression from PMID: 30772301 | SOX2 |
| ALDH4A1  | SOX2 regulated genes in Keratinocyte Overexpression from PMID: 30772301 | SOX2 |
| SEMA3F   | SOX2 regulated genes in Keratinocyte Overexpression from PMID: 30772301 | SOX2 |
| ZBTB1    | SOX2 regulated genes in Keratinocyte Overexpression from PMID: 30772301 | SOX2 |
| MRPL54   | SOX2 regulated genes in Keratinocyte Overexpression from PMID: 30772301 | SOX2 |
| RPL22    | SOX2 regulated genes in Keratinocyte Overexpression from PMID: 30772301 | SOX2 |
| KRT80    | SOX2 regulated genes in Keratinocyte Overexpression from PMID: 30772301 | SOX2 |
| SOX5     | SOX2 regulated genes in Keratinocyte Overexpression from PMID: 30772301 | SOX2 |
| GTF3C4   | SOX2 regulated genes in Keratinocyte Overexpression from PMID: 30772301 | SOX2 |
| TRPM4    | SOX2 regulated genes in Keratinocyte Overexpression from PMID: 30772301 | SOX2 |
| PAXIP1   | SOX2 regulated genes in Keratinocyte Overexpression from PMID: 30772301 | SOX2 |
| AARSD1   | SOX2 regulated genes in Keratinocyte Overexpression from PMID: 30772301 | SOX2 |
| ZRANB3   | SOX2 regulated genes in Keratinocyte Overexpression from PMID: 30772301 | SOX2 |
| GPR173   | SOX2 regulated genes in Keratinocyte Overexpression from PMID: 30772301 | SOX2 |
| HSPA1L   | SOX2 regulated genes in Keratinocyte Overexpression from PMID: 30772301 | SOX2 |
| TMEM170A | SOX2 regulated genes in Keratinocyte Overexpression from PMID: 30772301 | SOX2 |
| NOC3L    | SOX2 regulated genes in Keratinocyte Overexpression from PMID: 30772301 | SOX2 |
| MTRF1L   | SOX2 regulated genes in Keratinocyte Overexpression from PMID: 30772301 | SOX2 |
| ATF1     | SOX2 regulated genes in Keratinocyte Overexpression from PMID: 30772301 | SOX2 |
| MED18    | SOX2 regulated genes in Keratinocyte Overexpression from PMID: 30772301 | SOX2 |
| GPC3     | SOX2 regulated genes in Keratinocyte Overexpression from PMID: 30772301 | SOX2 |
| SYBU     | SOX2 regulated genes in Keratinocyte Overexpression from PMID: 30772301 | SOX2 |
| BBS1     | SOX2 regulated genes in Keratinocyte Overexpression from PMID: 30772301 | SOX2 |
| SUPT4H1  | SOX2 regulated genes in Keratinocyte Overexpression from PMID: 30772301 | SOX2 |
| TSSK6    | SOX2 regulated genes in Keratinocyte Overexpression from PMID: 30772301 | SOX2 |
| UTP14C   | SOX2 regulated genes in Keratinocyte Overexpression from PMID: 30772301 | SOX2 |
| PLCH2    | SOX2 regulated genes in Keratinocyte Overexpression from PMID: 30772301 | SOX2 |
| UBR5     | SOX2 regulated genes in Keratinocyte Overexpression from PMID: 30772301 | SOX2 |
| EDC4     | SOX2 regulated genes in Keratinocyte Overexpression from PMID: 30772301 | SOX2 |
| LSM8     | SOX2 regulated genes in Keratinocyte Overexpression from PMID: 30772301 | SOX2 |
| LCN12    | SOX2 regulated genes in Keratinocyte Overexpression from PMID: 30772301 | SOX2 |

|           |                                                                         |      |
|-----------|-------------------------------------------------------------------------|------|
| MBNL3     | SOX2 regulated genes in Keratinocyte Overexpression from PMID: 30772301 | SOX2 |
| NAE1      | SOX2 regulated genes in Keratinocyte Overexpression from PMID: 30772301 | SOX2 |
| SOX10     | SOX2 regulated genes in Keratinocyte Overexpression from PMID: 30772301 | SOX2 |
| STRN4     | SOX2 regulated genes in Keratinocyte Overexpression from PMID: 30772301 | SOX2 |
| SLC38A3   | SOX2 regulated genes in Keratinocyte Overexpression from PMID: 30772301 | SOX2 |
| RIOX2     | SOX2 regulated genes in Keratinocyte Overexpression from PMID: 30772301 | SOX2 |
| HELQ      | SOX2 regulated genes in Keratinocyte Overexpression from PMID: 30772301 | SOX2 |
| CD200R1   | SOX2 regulated genes in Keratinocyte Overexpression from PMID: 30772301 | SOX2 |
| EXOSC8    | SOX2 regulated genes in Keratinocyte Overexpression from PMID: 30772301 | SOX2 |
| FANCE     | SOX2 regulated genes in Keratinocyte Overexpression from PMID: 30772301 | SOX2 |
| NEK5      | SOX2 regulated genes in Keratinocyte Overexpression from PMID: 30772301 | SOX2 |
| YWHAQ     | SOX2 regulated genes in Keratinocyte Overexpression from PMID: 30772301 | SOX2 |
| TENM4     | SOX2 regulated genes in Keratinocyte Overexpression from PMID: 30772301 | SOX2 |
| AMMECR1   | SOX2 regulated genes in Keratinocyte Overexpression from PMID: 30772301 | SOX2 |
| STRBP     | SOX2 regulated genes in Keratinocyte Overexpression from PMID: 30772301 | SOX2 |
| METAP1    | SOX2 regulated genes in Keratinocyte Overexpression from PMID: 30772301 | SOX2 |
| DNAJC2    | SOX2 regulated genes in Keratinocyte Overexpression from PMID: 30772301 | SOX2 |
| HAUS3     | SOX2 regulated genes in Keratinocyte Overexpression from PMID: 30772301 | SOX2 |
| PAQR5     | SOX2 regulated genes in Keratinocyte Overexpression from PMID: 30772301 | SOX2 |
| CECR2     | SOX2 regulated genes in Keratinocyte Overexpression from PMID: 30772301 | SOX2 |
| SPDL1     | SOX2 regulated genes in Keratinocyte Overexpression from PMID: 30772301 | SOX2 |
| ABLIM2    | SOX2 regulated genes in Keratinocyte Overexpression from PMID: 30772301 | SOX2 |
| PIN1      | SOX2 regulated genes in Keratinocyte Overexpression from PMID: 30772301 | SOX2 |
| PHF6      | SOX2 regulated genes in Keratinocyte Overexpression from PMID: 30772301 | SOX2 |
| CTDSPL    | SOX2 regulated genes in Keratinocyte Overexpression from PMID: 30772301 | SOX2 |
| SERHL2    | SOX2 regulated genes in Keratinocyte Overexpression from PMID: 30772301 | SOX2 |
| NOL11     | SOX2 regulated genes in Keratinocyte Overexpression from PMID: 30772301 | SOX2 |
| PIGU      | SOX2 regulated genes in Keratinocyte Overexpression from PMID: 30772301 | SOX2 |
| STX1A     | SOX2 regulated genes in Keratinocyte Overexpression from PMID: 30772301 | SOX2 |
| SDK2      | SOX2 regulated genes in Keratinocyte Overexpression from PMID: 30772301 | SOX2 |
| SRD5A2    | SOX2 regulated genes in Keratinocyte Overexpression from PMID: 30772301 | SOX2 |
| BOLA2B    | SOX2 regulated genes in Keratinocyte Overexpression from PMID: 30772301 | SOX2 |
| COPS3     | SOX2 regulated genes in Keratinocyte Overexpression from PMID: 30772301 | SOX2 |
| C9orf152  | SOX2 regulated genes in Keratinocyte Overexpression from PMID: 30772301 | SOX2 |
| UNC93A    | SOX2 regulated genes in Keratinocyte Overexpression from PMID: 30772301 | SOX2 |
| MROH7     | SOX2 regulated genes in Keratinocyte Overexpression from PMID: 30772301 | SOX2 |
| SCX       | SOX2 regulated genes in Keratinocyte Overexpression from PMID: 30772301 | SOX2 |
| ZC3H4     | SOX2 regulated genes in Keratinocyte Overexpression from PMID: 30772301 | SOX2 |
| RPL37A    | SOX2 regulated genes in Keratinocyte Overexpression from PMID: 30772301 | SOX2 |
| ADCK2     | SOX2 regulated genes in Keratinocyte Overexpression from PMID: 30772301 | SOX2 |
| SIPA1L3   | SOX2 regulated genes in Keratinocyte Overexpression from PMID: 30772301 | SOX2 |
| TMC7      | SOX2 regulated genes in Keratinocyte Overexpression from PMID: 30772301 | SOX2 |
| TMEM171   | SOX2 regulated genes in Keratinocyte Overexpression from PMID: 30772301 | SOX2 |
| OCM       | SOX2 regulated genes in Keratinocyte Overexpression from PMID: 30772301 | SOX2 |
| DYRK2     | SOX2 regulated genes in Keratinocyte Overexpression from PMID: 30772301 | SOX2 |
| PLAG1     | SOX2 regulated genes in Keratinocyte Overexpression from PMID: 30772301 | SOX2 |
| DYNLL1    | SOX2 regulated genes in Keratinocyte Overexpression from PMID: 30772301 | SOX2 |
| PTGES2    | SOX2 regulated genes in Keratinocyte Overexpression from PMID: 30772301 | SOX2 |
| PLA2G4C   | SOX2 regulated genes in Keratinocyte Overexpression from PMID: 30772301 | SOX2 |
| PXYLP1    | SOX2 regulated genes in Keratinocyte Overexpression from PMID: 30772301 | SOX2 |
| RIMBP3C   | SOX2 regulated genes in Keratinocyte Overexpression from PMID: 30772301 | SOX2 |
| NDFIP2    | SOX2 regulated genes in Keratinocyte Overexpression from PMID: 30772301 | SOX2 |
| RSPO3     | SOX2 regulated genes in Keratinocyte Overexpression from PMID: 30772301 | SOX2 |
| TMEM185A  | SOX2 regulated genes in Keratinocyte Overexpression from PMID: 30772301 | SOX2 |
| LSM3      | SOX2 regulated genes in Keratinocyte Overexpression from PMID: 30772301 | SOX2 |
| ATP6V1H   | SOX2 regulated genes in Keratinocyte Overexpression from PMID: 30772301 | SOX2 |
| EPCAM     | SOX2 regulated genes in Keratinocyte Overexpression from PMID: 30772301 | SOX2 |
| EEF1AKMT1 | SOX2 regulated genes in Keratinocyte Overexpression from PMID: 30772301 | SOX2 |
| LATS1     | SOX2 regulated genes in Keratinocyte Overexpression from PMID: 30772301 | SOX2 |



|          |                                                                         |      |
|----------|-------------------------------------------------------------------------|------|
| TPBG     | SOX2 regulated genes in Keratinocyte Overexpression from PMID: 30772301 | SOX2 |
| RANBP17  | SOX2 regulated genes in Keratinocyte Overexpression from PMID: 30772301 | SOX2 |
| KIAA1958 | SOX2 regulated genes in Keratinocyte Overexpression from PMID: 30772301 | SOX2 |
| MSH3     | SOX2 regulated genes in Keratinocyte Overexpression from PMID: 30772301 | SOX2 |
| PDCD5    | SOX2 regulated genes in Keratinocyte Overexpression from PMID: 30772301 | SOX2 |
| ATN1     | SOX2 regulated genes in Keratinocyte Overexpression from PMID: 30772301 | SOX2 |
| PIP4K2C  | SOX2 regulated genes in Keratinocyte Overexpression from PMID: 30772301 | SOX2 |
| DEF6     | SOX2 regulated genes in Keratinocyte Overexpression from PMID: 30772301 | SOX2 |
| TMTC3    | SOX2 regulated genes in Keratinocyte Overexpression from PMID: 30772301 | SOX2 |
| PHLDB2   | SOX2 regulated genes in Keratinocyte Overexpression from PMID: 30772301 | SOX2 |
| LGALS12  | SOX2 regulated genes in Keratinocyte Overexpression from PMID: 30772301 | SOX2 |
| ZC3HC1   | SOX2 regulated genes in Keratinocyte Overexpression from PMID: 30772301 | SOX2 |
| DCAF13   | SOX2 regulated genes in Keratinocyte Overexpression from PMID: 30772301 | SOX2 |
| CHIC1    | SOX2 regulated genes in Keratinocyte Overexpression from PMID: 30772301 | SOX2 |
| TP53BP1  | SOX2 regulated genes in Keratinocyte Overexpression from PMID: 30772301 | SOX2 |
| SBK1     | SOX2 regulated genes in Keratinocyte Overexpression from PMID: 30772301 | SOX2 |
| GPLD1    | SOX2 regulated genes in Keratinocyte Overexpression from PMID: 30772301 | SOX2 |
| AHI1     | SOX2 regulated genes in Keratinocyte Overexpression from PMID: 30772301 | SOX2 |
| NHS      | SOX2 regulated genes in Keratinocyte Overexpression from PMID: 30772301 | SOX2 |
| IFT80    | SOX2 regulated genes in Keratinocyte Overexpression from PMID: 30772301 | SOX2 |
| PAM16    | SOX2 regulated genes in Keratinocyte Overexpression from PMID: 30772301 | SOX2 |
| ZCCHC10  | SOX2 regulated genes in Keratinocyte Overexpression from PMID: 30772301 | SOX2 |
| SLF1     | SOX2 regulated genes in Keratinocyte Overexpression from PMID: 30772301 | SOX2 |
| MCMBP    | SOX2 regulated genes in Keratinocyte Overexpression from PMID: 30772301 | SOX2 |
| OSGIN2   | SOX2 regulated genes in Keratinocyte Overexpression from PMID: 30772301 | SOX2 |
| XYLB     | SOX2 regulated genes in Keratinocyte Overexpression from PMID: 30772301 | SOX2 |
| BTBD10   | SOX2 regulated genes in Keratinocyte Overexpression from PMID: 30772301 | SOX2 |
| CLIC4    | SOX2 regulated genes in Keratinocyte Overexpression from PMID: 30772301 | SOX2 |
| GEMIN6   | SOX2 regulated genes in Keratinocyte Overexpression from PMID: 30772301 | SOX2 |
| MRPL46   | SOX2 regulated genes in Keratinocyte Overexpression from PMID: 30772301 | SOX2 |
| ATP7A    | SOX2 regulated genes in Keratinocyte Overexpression from PMID: 30772301 | SOX2 |
| PPM1B    | SOX2 regulated genes in Keratinocyte Overexpression from PMID: 30772301 | SOX2 |
| GADD45A  | SOX2 regulated genes in Keratinocyte Overexpression from PMID: 30772301 | SOX2 |
| WTAP     | SOX2 regulated genes in Keratinocyte Overexpression from PMID: 30772301 | SOX2 |
| GRIK4    | SOX2 regulated genes in Keratinocyte Overexpression from PMID: 30772301 | SOX2 |
| MED26    | SOX2 regulated genes in Keratinocyte Overexpression from PMID: 30772301 | SOX2 |
| PREX2    | SOX2 regulated genes in Keratinocyte Overexpression from PMID: 30772301 | SOX2 |
| GGACT    | SOX2 regulated genes in Keratinocyte Overexpression from PMID: 30772301 | SOX2 |
| ARNTL    | SOX2 regulated genes in Keratinocyte Overexpression from PMID: 30772301 | SOX2 |
| SLC30A4  | SOX2 regulated genes in Keratinocyte Overexpression from PMID: 30772301 | SOX2 |
| SUGT1    | SOX2 regulated genes in Keratinocyte Overexpression from PMID: 30772301 | SOX2 |
| PPWD1    | SOX2 regulated genes in Keratinocyte Overexpression from PMID: 30772301 | SOX2 |
| RASSF7   | SOX2 regulated genes in Keratinocyte Overexpression from PMID: 30772301 | SOX2 |
| TUBB4B   | SOX2 regulated genes in Keratinocyte Overexpression from PMID: 30772301 | SOX2 |
| MND1     | SOX2 regulated genes in Keratinocyte Overexpression from PMID: 30772301 | SOX2 |
| ZFYVE28  | SOX2 regulated genes in Keratinocyte Overexpression from PMID: 30772301 | SOX2 |
| TTC26    | SOX2 regulated genes in Keratinocyte Overexpression from PMID: 30772301 | SOX2 |
| GARNL3   | SOX2 regulated genes in Keratinocyte Overexpression from PMID: 30772301 | SOX2 |
| PRPF6    | SOX2 regulated genes in Keratinocyte Overexpression from PMID: 30772301 | SOX2 |
| KDM4A    | SOX2 regulated genes in Keratinocyte Overexpression from PMID: 30772301 | SOX2 |
| SPATA5   | SOX2 regulated genes in Keratinocyte Overexpression from PMID: 30772301 | SOX2 |
| SYT1     | SOX2 regulated genes in Keratinocyte Overexpression from PMID: 30772301 | SOX2 |
| DUS4L    | SOX2 regulated genes in Keratinocyte Overexpression from PMID: 30772301 | SOX2 |
| MRPS9    | SOX2 regulated genes in Keratinocyte Overexpression from PMID: 30772301 | SOX2 |
| ERMARD   | SOX2 regulated genes in Keratinocyte Overexpression from PMID: 30772301 | SOX2 |
| NSMAF    | SOX2 regulated genes in Keratinocyte Overexpression from PMID: 30772301 | SOX2 |
| CACNG4   | SOX2 regulated genes in Keratinocyte Overexpression from PMID: 30772301 | SOX2 |
| CEP126   | SOX2 regulated genes in Keratinocyte Overexpression from PMID: 30772301 | SOX2 |
| ZFH2     | SOX2 regulated genes in Keratinocyte Overexpression from PMID: 30772301 | SOX2 |

|          |                                                                         |      |
|----------|-------------------------------------------------------------------------|------|
| TMEM132A | SOX2 regulated genes in Keratinocyte Overexpression from PMID: 30772301 | SOX2 |
| AOC1     | SOX2 regulated genes in Keratinocyte Overexpression from PMID: 30772301 | SOX2 |
| NDUFAF8  | SOX2 regulated genes in Keratinocyte Overexpression from PMID: 30772301 | SOX2 |
| HYAL2    | SOX2 regulated genes in Keratinocyte Overexpression from PMID: 30772301 | SOX2 |
| MSH5     | SOX2 regulated genes in Keratinocyte Overexpression from PMID: 30772301 | SOX2 |
| FFAR3    | SOX2 regulated genes in Keratinocyte Overexpression from PMID: 30772301 | SOX2 |
| C16orf74 | SOX2 regulated genes in Keratinocyte Overexpression from PMID: 30772301 | SOX2 |
| METTL26  | SOX2 regulated genes in Keratinocyte Overexpression from PMID: 30772301 | SOX2 |
| SC5D     | SOX2 regulated genes in Keratinocyte Overexpression from PMID: 30772301 | SOX2 |
| MIP      | SOX2 regulated genes in Keratinocyte Overexpression from PMID: 30772301 | SOX2 |
| SEC16A   | SOX2 regulated genes in Keratinocyte Overexpression from PMID: 30772301 | SOX2 |
| ZBTB8B   | SOX2 regulated genes in Keratinocyte Overexpression from PMID: 30772301 | SOX2 |
| DNAJC17  | SOX2 regulated genes in Keratinocyte Overexpression from PMID: 30772301 | SOX2 |
| MACC1    | SOX2 regulated genes in Keratinocyte Overexpression from PMID: 30772301 | SOX2 |
| FBXO34   | SOX2 regulated genes in Keratinocyte Overexpression from PMID: 30772301 | SOX2 |
| ARID4A   | SOX2 regulated genes in Keratinocyte Overexpression from PMID: 30772301 | SOX2 |
| FBXO42   | SOX2 regulated genes in Keratinocyte Overexpression from PMID: 30772301 | SOX2 |
| ESRP1    | SOX2 regulated genes in Keratinocyte Overexpression from PMID: 30772301 | SOX2 |
| FMNL2    | SOX2 regulated genes in Keratinocyte Overexpression from PMID: 30772301 | SOX2 |
| RPL30    | SOX2 regulated genes in Keratinocyte Overexpression from PMID: 30772301 | SOX2 |
| ZNF213   | SOX2 regulated genes in Keratinocyte Overexpression from PMID: 30772301 | SOX2 |
| SUPV3L1  | SOX2 regulated genes in Keratinocyte Overexpression from PMID: 30772301 | SOX2 |
| ZNF334   | SOX2 regulated genes in Keratinocyte Overexpression from PMID: 30772301 | SOX2 |
| LPAR2    | SOX2 regulated genes in Keratinocyte Overexpression from PMID: 30772301 | SOX2 |
| ZCCHC7   | SOX2 regulated genes in Keratinocyte Overexpression from PMID: 30772301 | SOX2 |
| SYP      | SOX2 regulated genes in Keratinocyte Overexpression from PMID: 30772301 | SOX2 |
| CTNNA1   | SOX2 regulated genes in Keratinocyte Overexpression from PMID: 30772301 | SOX2 |
| ANKRD27  | SOX2 regulated genes in Keratinocyte Overexpression from PMID: 30772301 | SOX2 |
| LCMT1    | SOX2 regulated genes in Keratinocyte Overexpression from PMID: 30772301 | SOX2 |
| SNTB1    | SOX2 regulated genes in Keratinocyte Overexpression from PMID: 30772301 | SOX2 |
| KLHL32   | SOX2 regulated genes in Keratinocyte Overexpression from PMID: 30772301 | SOX2 |
| STX5     | SOX2 regulated genes in Keratinocyte Overexpression from PMID: 30772301 | SOX2 |
| IGHMBP2  | SOX2 regulated genes in Keratinocyte Overexpression from PMID: 30772301 | SOX2 |
| PLD6     | SOX2 regulated genes in Keratinocyte Overexpression from PMID: 30772301 | SOX2 |
| GNA11    | SOX2 regulated genes in Keratinocyte Overexpression from PMID: 30772301 | SOX2 |
| TTL      | SOX2 regulated genes in Keratinocyte Overexpression from PMID: 30772301 | SOX2 |
| SLC25A46 | SOX2 regulated genes in Keratinocyte Overexpression from PMID: 30772301 | SOX2 |
| GLI1     | SOX2 regulated genes in Keratinocyte Overexpression from PMID: 30772301 | SOX2 |
| RBM10    | SOX2 regulated genes in Keratinocyte Overexpression from PMID: 30772301 | SOX2 |
| THAP11   | SOX2 regulated genes in Keratinocyte Overexpression from PMID: 30772301 | SOX2 |
| DCTN3    | SOX2 regulated genes in Keratinocyte Overexpression from PMID: 30772301 | SOX2 |
| CALD1    | SOX2 regulated genes in Keratinocyte Overexpression from PMID: 30772301 | SOX2 |
| FAM193B  | SOX2 regulated genes in Keratinocyte Overexpression from PMID: 30772301 | SOX2 |
| AIG1     | SOX2 regulated genes in Keratinocyte Overexpression from PMID: 30772301 | SOX2 |
| SLC9A2   | SOX2 regulated genes in Keratinocyte Overexpression from PMID: 30772301 | SOX2 |
| TMEM268  | SOX2 regulated genes in Keratinocyte Overexpression from PMID: 30772301 | SOX2 |
| HAGH     | SOX2 regulated genes in Keratinocyte Overexpression from PMID: 30772301 | SOX2 |
| NUP210   | SOX2 regulated genes in Keratinocyte Overexpression from PMID: 30772301 | SOX2 |
| LRP8     | SOX2 regulated genes in Keratinocyte Overexpression from PMID: 30772301 | SOX2 |
| RBM42    | SOX2 regulated genes in Keratinocyte Overexpression from PMID: 30772301 | SOX2 |
| PTGER4   | SOX2 regulated genes in Keratinocyte Overexpression from PMID: 30772301 | SOX2 |
| MSH2     | SOX2 regulated genes in Keratinocyte Overexpression from PMID: 30772301 | SOX2 |
| YIF1A    | SOX2 regulated genes in Keratinocyte Overexpression from PMID: 30772301 | SOX2 |
| TUFM     | SOX2 regulated genes in Keratinocyte Overexpression from PMID: 30772301 | SOX2 |
| MICAL1   | SOX2 regulated genes in Keratinocyte Overexpression from PMID: 30772301 | SOX2 |
| TCF19    | SOX2 regulated genes in Keratinocyte Overexpression from PMID: 30772301 | SOX2 |
| LZTS2    | SOX2 regulated genes in Keratinocyte Overexpression from PMID: 30772301 | SOX2 |
| HSPB1    | SOX2 regulated genes in Keratinocyte Overexpression from PMID: 30772301 | SOX2 |
| CPSF2    | SOX2 regulated genes in Keratinocyte Overexpression from PMID: 30772301 | SOX2 |

|          |                                                                         |      |
|----------|-------------------------------------------------------------------------|------|
| SHCBP1   | SOX2 regulated genes in Keratinocyte Overexpression from PMID: 30772301 | SOX2 |
| DNLZ     | SOX2 regulated genes in Keratinocyte Overexpression from PMID: 30772301 | SOX2 |
| NSD2     | SOX2 regulated genes in Keratinocyte Overexpression from PMID: 30772301 | SOX2 |
| ZFP1     | SOX2 regulated genes in Keratinocyte Overexpression from PMID: 30772301 | SOX2 |
| GTPBP10  | SOX2 regulated genes in Keratinocyte Overexpression from PMID: 30772301 | SOX2 |
| DEPDC1B  | SOX2 regulated genes in Keratinocyte Overexpression from PMID: 30772301 | SOX2 |
| SERPINB9 | SOX2 regulated genes in Keratinocyte Overexpression from PMID: 30772301 | SOX2 |
| KIAA1549 | SOX2 regulated genes in Keratinocyte Overexpression from PMID: 30772301 | SOX2 |
| MBLAC1   | SOX2 regulated genes in Keratinocyte Overexpression from PMID: 30772301 | SOX2 |
| B3GALT6  | SOX2 regulated genes in Keratinocyte Overexpression from PMID: 30772301 | SOX2 |
| IFRD1    | SOX2 regulated genes in Keratinocyte Overexpression from PMID: 30772301 | SOX2 |
| KIT      | SOX2 regulated genes in Keratinocyte Overexpression from PMID: 30772301 | SOX2 |
| DIS3L    | SOX2 regulated genes in Keratinocyte Overexpression from PMID: 30772301 | SOX2 |
| S100PBP  | SOX2 regulated genes in Keratinocyte Overexpression from PMID: 30772301 | SOX2 |
| TDG      | SOX2 regulated genes in Keratinocyte Overexpression from PMID: 30772301 | SOX2 |
| POU2F1   | SOX2 regulated genes in Keratinocyte Overexpression from PMID: 30772301 | SOX2 |
| ABLIM3   | SOX2 regulated genes in Keratinocyte Overexpression from PMID: 30772301 | SOX2 |
| KCNK7    | SOX2 regulated genes in Keratinocyte Overexpression from PMID: 30772301 | SOX2 |
| KCNC3    | SOX2 regulated genes in Keratinocyte Overexpression from PMID: 30772301 | SOX2 |
| TXLNA    | SOX2 regulated genes in Keratinocyte Overexpression from PMID: 30772301 | SOX2 |
| DDX5     | SOX2 regulated genes in Keratinocyte Overexpression from PMID: 30772301 | SOX2 |
| RITA1    | SOX2 regulated genes in Keratinocyte Overexpression from PMID: 30772301 | SOX2 |
| RUNDC3A  | SOX2 regulated genes in Keratinocyte Overexpression from PMID: 30772301 | SOX2 |
| NLRX1    | SOX2 regulated genes in Keratinocyte Overexpression from PMID: 30772301 | SOX2 |
| DDX59    | SOX2 regulated genes in Keratinocyte Overexpression from PMID: 30772301 | SOX2 |
| ARHGAP29 | SOX2 regulated genes in Keratinocyte Overexpression from PMID: 30772301 | SOX2 |
| FBXO25   | SOX2 regulated genes in Keratinocyte Overexpression from PMID: 30772301 | SOX2 |
| SMPD4    | SOX2 regulated genes in Keratinocyte Overexpression from PMID: 30772301 | SOX2 |
| ODF2     | SOX2 regulated genes in Keratinocyte Overexpression from PMID: 30772301 | SOX2 |
| TXNL4B   | SOX2 regulated genes in Keratinocyte Overexpression from PMID: 30772301 | SOX2 |
| TIGD5    | SOX2 regulated genes in Keratinocyte Overexpression from PMID: 30772301 | SOX2 |
| PLA2G4B  | SOX2 regulated genes in Keratinocyte Overexpression from PMID: 30772301 | SOX2 |
| HAUS8    | SOX2 regulated genes in Keratinocyte Overexpression from PMID: 30772301 | SOX2 |
| C6orf163 | SOX2 regulated genes in Keratinocyte Overexpression from PMID: 30772301 | SOX2 |
| FBXO38   | SOX2 regulated genes in Keratinocyte Overexpression from PMID: 30772301 | SOX2 |
| UBE3B    | SOX2 regulated genes in Keratinocyte Overexpression from PMID: 30772301 | SOX2 |
| CACNA1H  | SOX2 regulated genes in Keratinocyte Overexpression from PMID: 30772301 | SOX2 |
| RFX1     | SOX2 regulated genes in Keratinocyte Overexpression from PMID: 30772301 | SOX2 |
| TTC13    | SOX2 regulated genes in Keratinocyte Overexpression from PMID: 30772301 | SOX2 |
| NGEF     | SOX2 regulated genes in Keratinocyte Overexpression from PMID: 30772301 | SOX2 |
| LRRC59   | SOX2 regulated genes in Keratinocyte Overexpression from PMID: 30772301 | SOX2 |
| PDCD10   | SOX2 regulated genes in Keratinocyte Overexpression from PMID: 30772301 | SOX2 |
| TOP2B    | SOX2 regulated genes in Keratinocyte Overexpression from PMID: 30772301 | SOX2 |
| OVCA2    | SOX2 regulated genes in Keratinocyte Overexpression from PMID: 30772301 | SOX2 |
| COX7A2   | SOX2 regulated genes in Keratinocyte Overexpression from PMID: 30772301 | SOX2 |
| SPSB2    | SOX2 regulated genes in Keratinocyte Overexpression from PMID: 30772301 | SOX2 |
| SNAPC2   | SOX2 regulated genes in Keratinocyte Overexpression from PMID: 30772301 | SOX2 |
| LETMD1   | SOX2 regulated genes in Keratinocyte Overexpression from PMID: 30772301 | SOX2 |
| TRMT13   | SOX2 regulated genes in Keratinocyte Overexpression from PMID: 30772301 | SOX2 |
| TRNAU1AP | SOX2 regulated genes in Keratinocyte Overexpression from PMID: 30772301 | SOX2 |
| HEXIM2   | SOX2 regulated genes in Keratinocyte Overexpression from PMID: 30772301 | SOX2 |
| C3orf62  | SOX2 regulated genes in Keratinocyte Overexpression from PMID: 30772301 | SOX2 |
| KIFC1    | SOX2 regulated genes in Keratinocyte Overexpression from PMID: 30772301 | SOX2 |
| PFDN6    | SOX2 regulated genes in Keratinocyte Overexpression from PMID: 30772301 | SOX2 |
| PPM1D    | SOX2 regulated genes in Keratinocyte Overexpression from PMID: 30772301 | SOX2 |
| CD320    | SOX2 regulated genes in Keratinocyte Overexpression from PMID: 30772301 | SOX2 |
| NUDC     | SOX2 regulated genes in Keratinocyte Overexpression from PMID: 30772301 | SOX2 |
| TRADD    | SOX2 regulated genes in Keratinocyte Overexpression from PMID: 30772301 | SOX2 |
| SSB      | SOX2 regulated genes in Keratinocyte Overexpression from PMID: 30772301 | SOX2 |



|          |                                                                         |      |
|----------|-------------------------------------------------------------------------|------|
| MUL1     | SOX2 regulated genes in Keratinocyte Overexpression from PMID: 30772301 | SOX2 |
| C16orf91 | SOX2 regulated genes in Keratinocyte Overexpression from PMID: 30772301 | SOX2 |
| CHMP2B   | SOX2 regulated genes in Keratinocyte Overexpression from PMID: 30772301 | SOX2 |
| FAM169A  | SOX2 regulated genes in Keratinocyte Overexpression from PMID: 30772301 | SOX2 |
| TFPT     | SOX2 regulated genes in Keratinocyte Overexpression from PMID: 30772301 | SOX2 |
| ZFAND2B  | SOX2 regulated genes in Keratinocyte Overexpression from PMID: 30772301 | SOX2 |
| PHLDA3   | SOX2 regulated genes in Keratinocyte Overexpression from PMID: 30772301 | SOX2 |
| ARAP2    | SOX2 regulated genes in Keratinocyte Overexpression from PMID: 30772301 | SOX2 |
| ATP13A2  | SOX2 regulated genes in Keratinocyte Overexpression from PMID: 30772301 | SOX2 |
| RAD9A    | SOX2 regulated genes in Keratinocyte Overexpression from PMID: 30772301 | SOX2 |
| PLEKHG6  | SOX2 regulated genes in Keratinocyte Overexpression from PMID: 30772301 | SOX2 |
| AMT      | SOX2 regulated genes in Keratinocyte Overexpression from PMID: 30772301 | SOX2 |
| ERI2     | SOX2 regulated genes in Keratinocyte Overexpression from PMID: 30772301 | SOX2 |
| CPNE4    | SOX2 regulated genes in Keratinocyte Overexpression from PMID: 30772301 | SOX2 |
| KLK7     | SOX2 regulated genes in Keratinocyte Overexpression from PMID: 30772301 | SOX2 |
| PYM1     | SOX2 regulated genes in Keratinocyte Overexpression from PMID: 30772301 | SOX2 |
| ATG9B    | SOX2 regulated genes in Keratinocyte Overexpression from PMID: 30772301 | SOX2 |
| ECE1     | SOX2 regulated genes in Keratinocyte Overexpression from PMID: 30772301 | SOX2 |
| ZNF768   | SOX2 regulated genes in Keratinocyte Overexpression from PMID: 30772301 | SOX2 |
| NPLOC4   | SOX2 regulated genes in Keratinocyte Overexpression from PMID: 30772301 | SOX2 |
| RAD54L   | SOX2 regulated genes in Keratinocyte Overexpression from PMID: 30772301 | SOX2 |
| SFSWAP   | SOX2 regulated genes in Keratinocyte Overexpression from PMID: 30772301 | SOX2 |
| ARF6     | SOX2 regulated genes in Keratinocyte Overexpression from PMID: 30772301 | SOX2 |
| GSK3B    | SOX2 regulated genes in Keratinocyte Overexpression from PMID: 30772301 | SOX2 |
| SMYD3    | SOX2 regulated genes in Keratinocyte Overexpression from PMID: 30772301 | SOX2 |
| VPS53    | SOX2 regulated genes in Keratinocyte Overexpression from PMID: 30772301 | SOX2 |
| FBXO41   | SOX2 regulated genes in Keratinocyte Overexpression from PMID: 30772301 | SOX2 |
| VPS26B   | SOX2 regulated genes in Keratinocyte Overexpression from PMID: 30772301 | SOX2 |
| CNOT3    | SOX2 regulated genes in Keratinocyte Overexpression from PMID: 30772301 | SOX2 |
| SEC61A1  | SOX2 regulated genes in Keratinocyte Overexpression from PMID: 30772301 | SOX2 |
| FBXW11   | SOX2 regulated genes in Keratinocyte Overexpression from PMID: 30772301 | SOX2 |
| DUSP10   | SOX2 regulated genes in Keratinocyte Overexpression from PMID: 30772301 | SOX2 |
| PPP1R13L | SOX2 regulated genes in Keratinocyte Overexpression from PMID: 30772301 | SOX2 |
| ZFYVE27  | SOX2 regulated genes in Keratinocyte Overexpression from PMID: 30772301 | SOX2 |
| BDP1     | SOX2 regulated genes in Keratinocyte Overexpression from PMID: 30772301 | SOX2 |
| PDE6G    | SOX2 regulated genes in Keratinocyte Overexpression from PMID: 30772301 | SOX2 |
| KLF16    | SOX2 regulated genes in Keratinocyte Overexpression from PMID: 30772301 | SOX2 |
| GPR19    | SOX2 regulated genes in Keratinocyte Overexpression from PMID: 30772301 | SOX2 |
| RBM33    | SOX2 regulated genes in Keratinocyte Overexpression from PMID: 30772301 | SOX2 |
| WDR55    | SOX2 regulated genes in Keratinocyte Overexpression from PMID: 30772301 | SOX2 |
| ZBTB7A   | SOX2 regulated genes in Keratinocyte Overexpression from PMID: 30772301 | SOX2 |
| RBBP4    | SOX2 regulated genes in Keratinocyte Overexpression from PMID: 30772301 | SOX2 |
| SNRPE    | SOX2 regulated genes in Keratinocyte Overexpression from PMID: 30772301 | SOX2 |
| MRPL24   | SOX2 regulated genes in Keratinocyte Overexpression from PMID: 30772301 | SOX2 |
| PPHLN1   | SOX2 regulated genes in Keratinocyte Overexpression from PMID: 30772301 | SOX2 |
| PCDH1    | SOX2 regulated genes in Keratinocyte Overexpression from PMID: 30772301 | SOX2 |
| RUNDC1   | SOX2 regulated genes in Keratinocyte Overexpression from PMID: 30772301 | SOX2 |
| YBX2     | SOX2 regulated genes in Keratinocyte Overexpression from PMID: 30772301 | SOX2 |
| VPS9D1   | SOX2 regulated genes in Keratinocyte Overexpression from PMID: 30772301 | SOX2 |
| RTCA     | SOX2 regulated genes in Keratinocyte Overexpression from PMID: 30772301 | SOX2 |
| HOXA5    | SOX2 regulated genes in Keratinocyte Overexpression from PMID: 30772301 | SOX2 |
| RGL2     | SOX2 regulated genes in Keratinocyte Overexpression from PMID: 30772301 | SOX2 |
| VIPAS39  | SOX2 regulated genes in Keratinocyte Overexpression from PMID: 30772301 | SOX2 |
| SWT1     | SOX2 regulated genes in Keratinocyte Overexpression from PMID: 30772301 | SOX2 |
| ATP5F1B  | SOX2 regulated genes in Keratinocyte Overexpression from PMID: 30772301 | SOX2 |
| DNMT1    | SOX2 regulated genes in Keratinocyte Overexpression from PMID: 30772301 | SOX2 |
| SENP5    | SOX2 regulated genes in Keratinocyte Overexpression from PMID: 30772301 | SOX2 |
| CLDN1    | SOX2 regulated genes in Keratinocyte Overexpression from PMID: 30772301 | SOX2 |
| ABCB11   | SOX2 regulated genes in Keratinocyte Overexpression from PMID: 30772301 | SOX2 |





|          |                                                                         |      |
|----------|-------------------------------------------------------------------------|------|
| NFATC2IP | SOX2 regulated genes in Keratinocyte Overexpression from PMID: 30772301 | SOX2 |
| STRIP1   | SOX2 regulated genes in Keratinocyte Overexpression from PMID: 30772301 | SOX2 |
| MEX3D    | SOX2 regulated genes in Keratinocyte Overexpression from PMID: 30772301 | SOX2 |
| ASB7     | SOX2 regulated genes in Keratinocyte Overexpression from PMID: 30772301 | SOX2 |
| PRSS22   | SOX2 regulated genes in Keratinocyte Overexpression from PMID: 30772301 | SOX2 |
| HGS      | SOX2 regulated genes in Keratinocyte Overexpression from PMID: 30772301 | SOX2 |
| NKIRAS2  | SOX2 regulated genes in Keratinocyte Overexpression from PMID: 30772301 | SOX2 |
| MGST3    | SOX2 regulated genes in Keratinocyte Overexpression from PMID: 30772301 | SOX2 |
| CAPN10   | SOX2 regulated genes in Keratinocyte Overexpression from PMID: 30772301 | SOX2 |
| EME1     | SOX2 regulated genes in Keratinocyte Overexpression from PMID: 30772301 | SOX2 |
| DLG1     | SOX2 regulated genes in Keratinocyte Overexpression from PMID: 30772301 | SOX2 |
| SHH      | SOX2 regulated genes in Keratinocyte Overexpression from PMID: 30772301 | SOX2 |
| PRPF3    | SOX2 regulated genes in Keratinocyte Overexpression from PMID: 30772301 | SOX2 |
| DUS3L    | SOX2 regulated genes in Keratinocyte Overexpression from PMID: 30772301 | SOX2 |
| FAT2     | SOX2 regulated genes in Keratinocyte Overexpression from PMID: 30772301 | SOX2 |
| PDHB     | SOX2 regulated genes in Keratinocyte Overexpression from PMID: 30772301 | SOX2 |
| TOMM40   | SOX2 regulated genes in Keratinocyte Overexpression from PMID: 30772301 | SOX2 |
| ORC1     | SOX2 regulated genes in Keratinocyte Overexpression from PMID: 30772301 | SOX2 |
| SLC44A2  | SOX2 regulated genes in Keratinocyte Overexpression from PMID: 30772301 | SOX2 |
| MRPS5    | SOX2 regulated genes in Keratinocyte Overexpression from PMID: 30772301 | SOX2 |
| TFAP2E   | SOX2 regulated genes in Keratinocyte Overexpression from PMID: 30772301 | SOX2 |
| KIF2A    | SOX2 regulated genes in Keratinocyte Overexpression from PMID: 30772301 | SOX2 |
| TADA3    | SOX2 regulated genes in Keratinocyte Overexpression from PMID: 30772301 | SOX2 |
| RRP8     | SOX2 regulated genes in Keratinocyte Overexpression from PMID: 30772301 | SOX2 |
| PFDN2    | SOX2 regulated genes in Keratinocyte Overexpression from PMID: 30772301 | SOX2 |
| ZNF513   | SOX2 regulated genes in Keratinocyte Overexpression from PMID: 30772301 | SOX2 |
| B3GNTL1  | SOX2 regulated genes in Keratinocyte Overexpression from PMID: 30772301 | SOX2 |
| S100A2   | SOX2 regulated genes in Keratinocyte Overexpression from PMID: 30772301 | SOX2 |
| LRIG3    | SOX2 regulated genes in Keratinocyte Overexpression from PMID: 30772301 | SOX2 |
| LUZP1    | SOX2 regulated genes in Keratinocyte Overexpression from PMID: 30772301 | SOX2 |
| C8orf58  | SOX2 regulated genes in Keratinocyte Overexpression from PMID: 30772301 | SOX2 |
| SSR2     | SOX2 regulated genes in Keratinocyte Overexpression from PMID: 30772301 | SOX2 |
| CDC42BPA | SOX2 regulated genes in Keratinocyte Overexpression from PMID: 30772301 | SOX2 |
| USP40    | SOX2 regulated genes in Keratinocyte Overexpression from PMID: 30772301 | SOX2 |
| SLC5A10  | SOX2 regulated genes in Keratinocyte Overexpression from PMID: 30772301 | SOX2 |
| SMG6     | SOX2 regulated genes in Keratinocyte Overexpression from PMID: 30772301 | SOX2 |
| EFCAB5   | SOX2 regulated genes in Keratinocyte Overexpression from PMID: 30772301 | SOX2 |
| ATP1B1   | SOX2 regulated genes in Keratinocyte Overexpression from PMID: 30772301 | SOX2 |
| DENND5B  | SOX2 regulated genes in Keratinocyte Overexpression from PMID: 30772301 | SOX2 |
| CNOT6L   | SOX2 regulated genes in Keratinocyte Overexpression from PMID: 30772301 | SOX2 |
| LIMA1    | SOX2 regulated genes in Keratinocyte Overexpression from PMID: 30772301 | SOX2 |
| EFNA4    | SOX2 regulated genes in Keratinocyte Overexpression from PMID: 30772301 | SOX2 |
| RAF1     | SOX2 regulated genes in Keratinocyte Overexpression from PMID: 30772301 | SOX2 |
| CRIP1    | SOX2 regulated genes in Keratinocyte Overexpression from PMID: 30772301 | SOX2 |
| TBCEL    | SOX2 regulated genes in Keratinocyte Overexpression from PMID: 30772301 | SOX2 |
| NIPAL4   | SOX2 regulated genes in Keratinocyte Overexpression from PMID: 30772301 | SOX2 |
| LRRC14   | SOX2 regulated genes in Keratinocyte Overexpression from PMID: 30772301 | SOX2 |
| TMEM40   | SOX2 regulated genes in Keratinocyte Overexpression from PMID: 30772301 | SOX2 |
| GRM3     | SOX2 regulated genes in Keratinocyte Overexpression from PMID: 30772301 | SOX2 |
| DDX46    | SOX2 regulated genes in Keratinocyte Overexpression from PMID: 30772301 | SOX2 |
| SLC16A10 | SOX2 regulated genes in Keratinocyte Overexpression from PMID: 30772301 | SOX2 |
| AURKC    | SOX2 regulated genes in Keratinocyte Overexpression from PMID: 30772301 | SOX2 |
| PASK     | SOX2 regulated genes in Keratinocyte Overexpression from PMID: 30772301 | SOX2 |
| LARP4    | SOX2 regulated genes in Keratinocyte Overexpression from PMID: 30772301 | SOX2 |
| PARD3B   | SOX2 regulated genes in Keratinocyte Overexpression from PMID: 30772301 | SOX2 |
| HJURP    | SOX2 regulated genes in Keratinocyte Overexpression from PMID: 30772301 | SOX2 |
| TBCB     | SOX2 regulated genes in Keratinocyte Overexpression from PMID: 30772301 | SOX2 |
| PGAP1    | SOX2 regulated genes in Keratinocyte Overexpression from PMID: 30772301 | SOX2 |
| PSMA5    | SOX2 regulated genes in Keratinocyte Overexpression from PMID: 30772301 | SOX2 |





|          |                                                                         |      |
|----------|-------------------------------------------------------------------------|------|
| QRICH2   | SOX2 regulated genes in Keratinocyte Overexpression from PMID: 30772301 | SOX2 |
| TNNI1    | SOX2 regulated genes in Keratinocyte Overexpression from PMID: 30772301 | SOX2 |
| TUBA4A   | SOX2 regulated genes in Keratinocyte Overexpression from PMID: 30772301 | SOX2 |
| SYNRG    | SOX2 regulated genes in Keratinocyte Overexpression from PMID: 30772301 | SOX2 |
| RARB     | SOX2 regulated genes in Keratinocyte Overexpression from PMID: 30772301 | SOX2 |
| HSF4     | SOX2 regulated genes in Keratinocyte Overexpression from PMID: 30772301 | SOX2 |
| SRSF1    | SOX2 regulated genes in Keratinocyte Overexpression from PMID: 30772301 | SOX2 |
| DMPK     | SOX2 regulated genes in Keratinocyte Overexpression from PMID: 30772301 | SOX2 |
| EIF4EBP3 | SOX2 regulated genes in Keratinocyte Overexpression from PMID: 30772301 | SOX2 |
| C1orf131 | SOX2 regulated genes in Keratinocyte Overexpression from PMID: 30772301 | SOX2 |
| IL11     | SOX2 regulated genes in Keratinocyte Overexpression from PMID: 30772301 | SOX2 |
| SAXO2    | SOX2 regulated genes in Keratinocyte Overexpression from PMID: 30772301 | SOX2 |
| PNKP     | SOX2 regulated genes in Keratinocyte Overexpression from PMID: 30772301 | SOX2 |
| C1orf74  | SOX2 regulated genes in Keratinocyte Overexpression from PMID: 30772301 | SOX2 |
| DVL1     | SOX2 regulated genes in Keratinocyte Overexpression from PMID: 30772301 | SOX2 |
| SLC19A3  | SOX2 regulated genes in Keratinocyte Overexpression from PMID: 30772301 | SOX2 |
| PMS1     | SOX2 regulated genes in Keratinocyte Overexpression from PMID: 30772301 | SOX2 |
| ECI2     | SOX2 regulated genes in Keratinocyte Overexpression from PMID: 30772301 | SOX2 |
| CDC42EP5 | SOX2 regulated genes in Keratinocyte Overexpression from PMID: 30772301 | SOX2 |
| DPP9     | SOX2 regulated genes in Keratinocyte Overexpression from PMID: 30772301 | SOX2 |
| MYL6B    | SOX2 regulated genes in Keratinocyte Overexpression from PMID: 30772301 | SOX2 |
| DTL      | SOX2 regulated genes in Keratinocyte Overexpression from PMID: 30772301 | SOX2 |
| PCGF2    | SOX2 regulated genes in Keratinocyte Overexpression from PMID: 30772301 | SOX2 |
| TAF10    | SOX2 regulated genes in Keratinocyte Overexpression from PMID: 30772301 | SOX2 |
| PCF11    | SOX2 regulated genes in Keratinocyte Overexpression from PMID: 30772301 | SOX2 |
| SLC23A3  | SOX2 regulated genes in Keratinocyte Overexpression from PMID: 30772301 | SOX2 |
| PROSER3  | SOX2 regulated genes in Keratinocyte Overexpression from PMID: 30772301 | SOX2 |
| SETD6    | SOX2 regulated genes in Keratinocyte Overexpression from PMID: 30772301 | SOX2 |
| PARL     | SOX2 regulated genes in Keratinocyte Overexpression from PMID: 30772301 | SOX2 |
| IFRD2    | SOX2 regulated genes in Keratinocyte Overexpression from PMID: 30772301 | SOX2 |
| RPL23A   | SOX2 regulated genes in Keratinocyte Overexpression from PMID: 30772301 | SOX2 |
| LANCL2   | SOX2 regulated genes in Keratinocyte Overexpression from PMID: 30772301 | SOX2 |
| HBEGF    | SOX2 regulated genes in Keratinocyte Overexpression from PMID: 30772301 | SOX2 |
| YME1L1   | SOX2 regulated genes in Keratinocyte Overexpression from PMID: 30772301 | SOX2 |
| THUMPD1  | SOX2 regulated genes in Keratinocyte Overexpression from PMID: 30772301 | SOX2 |
| MRPL58   | SOX2 regulated genes in Keratinocyte Overexpression from PMID: 30772301 | SOX2 |
| ANKRD39  | SOX2 regulated genes in Keratinocyte Overexpression from PMID: 30772301 | SOX2 |
| AUNIP    | SOX2 regulated genes in Keratinocyte Overexpression from PMID: 30772301 | SOX2 |
| CNST     | SOX2 regulated genes in Keratinocyte Overexpression from PMID: 30772301 | SOX2 |
| ECSIT    | SOX2 regulated genes in Keratinocyte Overexpression from PMID: 30772301 | SOX2 |
| RPS27    | SOX2 regulated genes in Keratinocyte Overexpression from PMID: 30772301 | SOX2 |
| GRIN2A   | SOX2 regulated genes in Keratinocyte Overexpression from PMID: 30772301 | SOX2 |
| HDGF     | SOX2 regulated genes in Keratinocyte Overexpression from PMID: 30772301 | SOX2 |
| F12      | SOX2 regulated genes in Keratinocyte Overexpression from PMID: 30772301 | SOX2 |
| SIK3     | SOX2 regulated genes in Keratinocyte Overexpression from PMID: 30772301 | SOX2 |
| GLOD4    | SOX2 regulated genes in Keratinocyte Overexpression from PMID: 30772301 | SOX2 |
| NDUFAF7  | SOX2 regulated genes in Keratinocyte Overexpression from PMID: 30772301 | SOX2 |
| MDH2     | SOX2 regulated genes in Keratinocyte Overexpression from PMID: 30772301 | SOX2 |
| SBNO1    | SOX2 regulated genes in Keratinocyte Overexpression from PMID: 30772301 | SOX2 |
| GPR42    | SOX2 regulated genes in Keratinocyte Overexpression from PMID: 30772301 | SOX2 |
| SIN3B    | SOX2 regulated genes in Keratinocyte Overexpression from PMID: 30772301 | SOX2 |
| ESPNL    | SOX2 regulated genes in Keratinocyte Overexpression from PMID: 30772301 | SOX2 |
| DHRS9    | SOX2 regulated genes in Keratinocyte Overexpression from PMID: 30772301 | SOX2 |
| CCDC78   | SOX2 regulated genes in Keratinocyte Overexpression from PMID: 30772301 | SOX2 |
| GTF2F1   | SOX2 regulated genes in Keratinocyte Overexpression from PMID: 30772301 | SOX2 |
| DVL2     | SOX2 regulated genes in Keratinocyte Overexpression from PMID: 30772301 | SOX2 |
| RECQL5   | SOX2 regulated genes in Keratinocyte Overexpression from PMID: 30772301 | SOX2 |
| TATDN1   | SOX2 regulated genes in Keratinocyte Overexpression from PMID: 30772301 | SOX2 |
| ALOX12   | SOX2 regulated genes in Keratinocyte Overexpression from PMID: 30772301 | SOX2 |

|                 |                                                                         |      |
|-----------------|-------------------------------------------------------------------------|------|
| MRPS27          | SOX2 regulated genes in Keratinocyte Overexpression from PMID: 30772301 | SOX2 |
| LSG1            | SOX2 regulated genes in Keratinocyte Overexpression from PMID: 30772301 | SOX2 |
| METTL23         | SOX2 regulated genes in Keratinocyte Overexpression from PMID: 30772301 | SOX2 |
| POGK            | SOX2 regulated genes in Keratinocyte Overexpression from PMID: 30772301 | SOX2 |
| MRPS22          | SOX2 regulated genes in Keratinocyte Overexpression from PMID: 30772301 | SOX2 |
| HP1BP3          | SOX2 regulated genes in Keratinocyte Overexpression from PMID: 30772301 | SOX2 |
| CAPN5           | SOX2 regulated genes in Keratinocyte Overexpression from PMID: 30772301 | SOX2 |
| SRCAP           | SOX2 regulated genes in Keratinocyte Overexpression from PMID: 30772301 | SOX2 |
| GTF3C2          | SOX2 regulated genes in Keratinocyte Overexpression from PMID: 30772301 | SOX2 |
| TMA7            | SOX2 regulated genes in Keratinocyte Overexpression from PMID: 30772301 | SOX2 |
| PPP1R16A        | SOX2 regulated genes in Keratinocyte Overexpression from PMID: 30772301 | SOX2 |
| HOXB5           | SOX2 regulated genes in Keratinocyte Overexpression from PMID: 30772301 | SOX2 |
| ENOPH1          | SOX2 regulated genes in Keratinocyte Overexpression from PMID: 30772301 | SOX2 |
| ZNF146          | SOX2 regulated genes in Keratinocyte Overexpression from PMID: 30772301 | SOX2 |
| POLR2D          | SOX2 regulated genes in Keratinocyte Overexpression from PMID: 30772301 | SOX2 |
| DCAF15          | SOX2 regulated genes in Keratinocyte Overexpression from PMID: 30772301 | SOX2 |
| FAT1            | SOX2 regulated genes in Keratinocyte Overexpression from PMID: 30772301 | SOX2 |
| SDR16C5         | SOX2 regulated genes in Keratinocyte Overexpression from PMID: 30772301 | SOX2 |
| TRNT1           | SOX2 regulated genes in Keratinocyte Overexpression from PMID: 30772301 | SOX2 |
| BCL2L12         | SOX2 regulated genes in Keratinocyte Overexpression from PMID: 30772301 | SOX2 |
| LMBR1L          | SOX2 regulated genes in Keratinocyte Overexpression from PMID: 30772301 | SOX2 |
| BLOC1S4         | SOX2 regulated genes in Keratinocyte Overexpression from PMID: 30772301 | SOX2 |
| VANGL1          | SOX2 regulated genes in Keratinocyte Overexpression from PMID: 30772301 | SOX2 |
| SAP30BP         | SOX2 regulated genes in Keratinocyte Overexpression from PMID: 30772301 | SOX2 |
| CCDC158         | SOX2 regulated genes in Keratinocyte Overexpression from PMID: 30772301 | SOX2 |
| CCDC91          | SOX2 regulated genes in Keratinocyte Overexpression from PMID: 30772301 | SOX2 |
| SPATA24         | SOX2 regulated genes in Keratinocyte Overexpression from PMID: 30772301 | SOX2 |
| C8orf76         | SOX2 regulated genes in Keratinocyte Overexpression from PMID: 30772301 | SOX2 |
| ZHX1-C8orf76    | SOX2 regulated genes in Keratinocyte Overexpression from PMID: 30772301 | SOX2 |
| MAZ             | SOX2 regulated genes in Keratinocyte Overexpression from PMID: 30772301 | SOX2 |
| JUND            | SOX2 regulated genes in Keratinocyte Overexpression from PMID: 30772301 | SOX2 |
| POLR3A          | SOX2 regulated genes in Keratinocyte Overexpression from PMID: 30772301 | SOX2 |
| FOXH1           | SOX2 regulated genes in Keratinocyte Overexpression from PMID: 30772301 | SOX2 |
| KIFC2           | SOX2 regulated genes in Keratinocyte Overexpression from PMID: 30772301 | SOX2 |
| RGS16           | SOX2 regulated genes in Keratinocyte Overexpression from PMID: 30772301 | SOX2 |
| SPIRE2          | SOX2 regulated genes in Keratinocyte Overexpression from PMID: 30772301 | SOX2 |
| CFAP45          | SOX2 regulated genes in Keratinocyte Overexpression from PMID: 30772301 | SOX2 |
| RNASEK-C17orf45 | SOX2 regulated genes in Keratinocyte Overexpression from PMID: 30772301 | SOX2 |
| C17orf49        | SOX2 regulated genes in Keratinocyte Overexpression from PMID: 30772301 | SOX2 |
| BTF3L4          | SOX2 regulated genes in Keratinocyte Overexpression from PMID: 30772301 | SOX2 |
| ATG101          | SOX2 regulated genes in Keratinocyte Overexpression from PMID: 30772301 | SOX2 |
| SOS1            | SOX2 regulated genes in Keratinocyte Overexpression from PMID: 30772301 | SOX2 |
| TMEM101         | SOX2 regulated genes in Keratinocyte Overexpression from PMID: 30772301 | SOX2 |
| BAP1            | SOX2 regulated genes in Keratinocyte Overexpression from PMID: 30772301 | SOX2 |
| PIK3R2          | SOX2 regulated genes in Keratinocyte Overexpression from PMID: 30772301 | SOX2 |
| ZMYM1           | SOX2 regulated genes in Keratinocyte Overexpression from PMID: 30772301 | SOX2 |
| B4GALT3         | SOX2 regulated genes in Keratinocyte Overexpression from PMID: 30772301 | SOX2 |
| KRR1            | SOX2 regulated genes in Keratinocyte Overexpression from PMID: 30772301 | SOX2 |
| KLHDC3          | SOX2 regulated genes in Keratinocyte Overexpression from PMID: 30772301 | SOX2 |
| ARHGAP35        | SOX2 regulated genes in Keratinocyte Overexpression from PMID: 30772301 | SOX2 |
| CXCR5           | SOX2 regulated genes in Keratinocyte Overexpression from PMID: 30772301 | SOX2 |
| NMRAL1          | SOX2 regulated genes in Keratinocyte Overexpression from PMID: 30772301 | SOX2 |
| SUPT7L          | SOX2 regulated genes in Keratinocyte Overexpression from PMID: 30772301 | SOX2 |
| TMEM65          | SOX2 regulated genes in Keratinocyte Overexpression from PMID: 30772301 | SOX2 |
| MCM2            | SOX2 regulated genes in Keratinocyte Overexpression from PMID: 30772301 | SOX2 |
| HSPE1           | SOX2 regulated genes in Keratinocyte Overexpression from PMID: 30772301 | SOX2 |
| MFSD2A          | SOX2 regulated genes in Keratinocyte Overexpression from PMID: 30772301 | SOX2 |
| HMBS            | SOX2 regulated genes in Keratinocyte Overexpression from PMID: 30772301 | SOX2 |
| SRPK2           | SOX2 regulated genes in Keratinocyte Overexpression from PMID: 30772301 | SOX2 |



|            |                                                                         |      |
|------------|-------------------------------------------------------------------------|------|
| SPC25      | SOX2 regulated genes in Keratinocyte Overexpression from PMID: 30772301 | SOX2 |
| MAP4K4     | SOX2 regulated genes in Keratinocyte Overexpression from PMID: 30772301 | SOX2 |
| UBA52      | SOX2 regulated genes in Keratinocyte Overexpression from PMID: 30772301 | SOX2 |
| TTYH1      | SOX2 regulated genes in Keratinocyte Overexpression from PMID: 30772301 | SOX2 |
| MMADHC     | SOX2 regulated genes in Keratinocyte Overexpression from PMID: 30772301 | SOX2 |
| ZNF598     | SOX2 regulated genes in Keratinocyte Overexpression from PMID: 30772301 | SOX2 |
| PHLDB3     | SOX2 regulated genes in Keratinocyte Overexpression from PMID: 30772301 | SOX2 |
| FBRSL1     | SOX2 regulated genes in Keratinocyte Overexpression from PMID: 30772301 | SOX2 |
| USP7       | SOX2 regulated genes in Keratinocyte Overexpression from PMID: 30772301 | SOX2 |
| OGG1       | SOX2 regulated genes in Keratinocyte Overexpression from PMID: 30772301 | SOX2 |
| TEX19      | SOX2 regulated genes in Keratinocyte Overexpression from PMID: 30772301 | SOX2 |
| SMARCD2    | SOX2 regulated genes in Keratinocyte Overexpression from PMID: 30772301 | SOX2 |
| CHD1L      | SOX2 regulated genes in Keratinocyte Overexpression from PMID: 30772301 | SOX2 |
| MORN2      | SOX2 regulated genes in Keratinocyte Overexpression from PMID: 30772301 | SOX2 |
| PWWP2A     | SOX2 regulated genes in Keratinocyte Overexpression from PMID: 30772301 | SOX2 |
| RPS13      | SOX2 regulated genes in Keratinocyte Overexpression from PMID: 30772301 | SOX2 |
| OPRD1      | SOX2 regulated genes in Keratinocyte Overexpression from PMID: 30772301 | SOX2 |
| ZBTB9      | SOX2 regulated genes in Keratinocyte Overexpression from PMID: 30772301 | SOX2 |
| DDX54      | SOX2 regulated genes in Keratinocyte Overexpression from PMID: 30772301 | SOX2 |
| UNG        | SOX2 regulated genes in Keratinocyte Overexpression from PMID: 30772301 | SOX2 |
| EIF2D      | SOX2 regulated genes in Keratinocyte Overexpression from PMID: 30772301 | SOX2 |
| CHMP1A     | SOX2 regulated genes in Keratinocyte Overexpression from PMID: 30772301 | SOX2 |
| ICAM4      | SOX2 regulated genes in Keratinocyte Overexpression from PMID: 30772301 | SOX2 |
| ATRIP      | SOX2 regulated genes in Keratinocyte Overexpression from PMID: 30772301 | SOX2 |
| ATP2A2     | SOX2 regulated genes in Keratinocyte Overexpression from PMID: 30772301 | SOX2 |
| ERBB3      | SOX2 regulated genes in Keratinocyte Overexpression from PMID: 30772301 | SOX2 |
| HARS2      | SOX2 regulated genes in Keratinocyte Overexpression from PMID: 30772301 | SOX2 |
| TP53BP2    | SOX2 regulated genes in Keratinocyte Overexpression from PMID: 30772301 | SOX2 |
| PIGV       | SOX2 regulated genes in Keratinocyte Overexpression from PMID: 30772301 | SOX2 |
| IGSF8      | SOX2 regulated genes in Keratinocyte Overexpression from PMID: 30772301 | SOX2 |
| FIGNL1     | SOX2 regulated genes in Keratinocyte Overexpression from PMID: 30772301 | SOX2 |
| CENPL      | SOX2 regulated genes in Keratinocyte Overexpression from PMID: 30772301 | SOX2 |
| MON1A      | SOX2 regulated genes in Keratinocyte Overexpression from PMID: 30772301 | SOX2 |
| LRRC56     | SOX2 regulated genes in Keratinocyte Overexpression from PMID: 30772301 | SOX2 |
| AGRN       | SOX2 regulated genes in Keratinocyte Overexpression from PMID: 30772301 | SOX2 |
| UBE2T      | SOX2 regulated genes in Keratinocyte Overexpression from PMID: 30772301 | SOX2 |
| C16orf96   | SOX2 regulated genes in Keratinocyte Overexpression from PMID: 30772301 | SOX2 |
| SDS        | SOX2 regulated genes in Keratinocyte Overexpression from PMID: 30772301 | SOX2 |
| CRIP3      | SOX2 regulated genes in Keratinocyte Overexpression from PMID: 30772301 | SOX2 |
| PRR36      | SOX2 regulated genes in Keratinocyte Overexpression from PMID: 30772301 | SOX2 |
| LIN9       | SOX2 regulated genes in Keratinocyte Overexpression from PMID: 30772301 | SOX2 |
| CYTH2      | SOX2 regulated genes in Keratinocyte Overexpression from PMID: 30772301 | SOX2 |
| NPHP1      | SOX2 regulated genes in Keratinocyte Overexpression from PMID: 30772301 | SOX2 |
| ACOT4      | SOX2 regulated genes in Keratinocyte Overexpression from PMID: 30772301 | SOX2 |
| ADGRL2     | SOX2 regulated genes in Keratinocyte Overexpression from PMID: 30772301 | SOX2 |
| C6orf141   | SOX2 regulated genes in Keratinocyte Overexpression from PMID: 30772301 | SOX2 |
| HSPA4      | SOX2 regulated genes in Keratinocyte Overexpression from PMID: 30772301 | SOX2 |
| XAB2       | SOX2 regulated genes in Keratinocyte Overexpression from PMID: 30772301 | SOX2 |
| TRPM8      | SOX2 regulated genes in Keratinocyte Overexpression from PMID: 30772301 | SOX2 |
| NOP16      | SOX2 regulated genes in Keratinocyte Overexpression from PMID: 30772301 | SOX2 |
| PMF1-BGLAP | SOX2 regulated genes in Keratinocyte Overexpression from PMID: 30772301 | SOX2 |
| PMF1       | SOX2 regulated genes in Keratinocyte Overexpression from PMID: 30772301 | SOX2 |
| ZBTB11     | SOX2 regulated genes in Keratinocyte Overexpression from PMID: 30772301 | SOX2 |
| TMEM120A   | SOX2 regulated genes in Keratinocyte Overexpression from PMID: 30772301 | SOX2 |
| CNPPD1     | SOX2 regulated genes in Keratinocyte Overexpression from PMID: 30772301 | SOX2 |
| NEURL4     | SOX2 regulated genes in Keratinocyte Overexpression from PMID: 30772301 | SOX2 |
| POLR3K     | SOX2 regulated genes in Keratinocyte Overexpression from PMID: 30772301 | SOX2 |
| DVL3       | SOX2 regulated genes in Keratinocyte Overexpression from PMID: 30772301 | SOX2 |
| RAVER1     | SOX2 regulated genes in Keratinocyte Overexpression from PMID: 30772301 | SOX2 |

|          |                                                                         |      |
|----------|-------------------------------------------------------------------------|------|
| CHEK1    | SOX2 regulated genes in Keratinocyte Overexpression from PMID: 30772301 | SOX2 |
| TMEM238  | SOX2 regulated genes in Keratinocyte Overexpression from PMID: 30772301 | SOX2 |
| UCHL5    | SOX2 regulated genes in Keratinocyte Overexpression from PMID: 30772301 | SOX2 |
| CHD1     | SOX2 regulated genes in Keratinocyte Overexpression from PMID: 30772301 | SOX2 |
| SLC25A3  | SOX2 regulated genes in Keratinocyte Overexpression from PMID: 30772301 | SOX2 |
| ZNF32    | SOX2 regulated genes in Keratinocyte Overexpression from PMID: 30772301 | SOX2 |
| SENP8    | SOX2 regulated genes in Keratinocyte Overexpression from PMID: 30772301 | SOX2 |
| METTL5   | SOX2 regulated genes in Keratinocyte Overexpression from PMID: 30772301 | SOX2 |
| ZNF566   | SOX2 regulated genes in Keratinocyte Overexpression from PMID: 30772301 | SOX2 |
| HAPLN3   | SOX2 regulated genes in Keratinocyte Overexpression from PMID: 30772301 | SOX2 |
| SMC3     | SOX2 regulated genes in Keratinocyte Overexpression from PMID: 30772301 | SOX2 |
| GADD45B  | SOX2 regulated genes in Keratinocyte Overexpression from PMID: 30772301 | SOX2 |
| MAP6     | SOX2 regulated genes in Keratinocyte Overexpression from PMID: 30772301 | SOX2 |
| ANKRD52  | SOX2 regulated genes in Keratinocyte Overexpression from PMID: 30772301 | SOX2 |
| PALMD    | SOX2 regulated genes in Keratinocyte Overexpression from PMID: 30772301 | SOX2 |
| EGR2     | SOX2 regulated genes in Keratinocyte Overexpression from PMID: 30772301 | SOX2 |
| PRR11    | SOX2 regulated genes in Keratinocyte Overexpression from PMID: 30772301 | SOX2 |
| CWC25    | SOX2 regulated genes in Keratinocyte Overexpression from PMID: 30772301 | SOX2 |
| HDAC3    | SOX2 regulated genes in Keratinocyte Overexpression from PMID: 30772301 | SOX2 |
| DHX37    | SOX2 regulated genes in Keratinocyte Overexpression from PMID: 30772301 | SOX2 |
| NUDCD1   | SOX2 regulated genes in Keratinocyte Overexpression from PMID: 30772301 | SOX2 |
| LIPH     | SOX2 regulated genes in Keratinocyte Overexpression from PMID: 30772301 | SOX2 |
| KIF21B   | SOX2 regulated genes in Keratinocyte Overexpression from PMID: 30772301 | SOX2 |
| DHPS     | SOX2 regulated genes in Keratinocyte Overexpression from PMID: 30772301 | SOX2 |
| TRNP1    | SOX2 regulated genes in Keratinocyte Overexpression from PMID: 30772301 | SOX2 |
| C2CD2L   | SOX2 regulated genes in Keratinocyte Overexpression from PMID: 30772301 | SOX2 |
| AMBRA1   | SOX2 regulated genes in Keratinocyte Overexpression from PMID: 30772301 | SOX2 |
| LCLAT1   | SOX2 regulated genes in Keratinocyte Overexpression from PMID: 30772301 | SOX2 |
| MRPL28   | SOX2 regulated genes in Keratinocyte Overexpression from PMID: 30772301 | SOX2 |
| ANGPTL4  | SOX2 regulated genes in Keratinocyte Overexpression from PMID: 30772301 | SOX2 |
| PLEKHA1  | SOX2 regulated genes in Keratinocyte Overexpression from PMID: 30772301 | SOX2 |
| UBXN1    | SOX2 regulated genes in Keratinocyte Overexpression from PMID: 30772301 | SOX2 |
| SDHB     | SOX2 regulated genes in Keratinocyte Overexpression from PMID: 30772301 | SOX2 |
| GALE     | SOX2 regulated genes in Keratinocyte Overexpression from PMID: 30772301 | SOX2 |
| ORAI2    | SOX2 regulated genes in Keratinocyte Overexpression from PMID: 30772301 | SOX2 |
| AMMECR1L | SOX2 regulated genes in Keratinocyte Overexpression from PMID: 30772301 | SOX2 |
| FIGLA    | SOX2 regulated genes in Keratinocyte Overexpression from PMID: 30772301 | SOX2 |
| BTBD19   | SOX2 regulated genes in Keratinocyte Overexpression from PMID: 30772301 | SOX2 |
| ZRANB2   | SOX2 regulated genes in Keratinocyte Overexpression from PMID: 30772301 | SOX2 |
| PTCHD4   | SOX2 regulated genes in Keratinocyte Overexpression from PMID: 30772301 | SOX2 |
| PRPF40B  | SOX2 regulated genes in Keratinocyte Overexpression from PMID: 30772301 | SOX2 |
| RTF1     | SOX2 regulated genes in Keratinocyte Overexpression from PMID: 30772301 | SOX2 |
| GPAT4    | SOX2 regulated genes in Keratinocyte Overexpression from PMID: 30772301 | SOX2 |
| SMC4     | SOX2 regulated genes in Keratinocyte Overexpression from PMID: 30772301 | SOX2 |
| SPTY2D1  | SOX2 regulated genes in Keratinocyte Overexpression from PMID: 30772301 | SOX2 |
| GATA3    | SOX2 regulated genes in Keratinocyte Overexpression from PMID: 30772301 | SOX2 |
| ZNF296   | SOX2 regulated genes in Keratinocyte Overexpression from PMID: 30772301 | SOX2 |
| KIF9     | SOX2 regulated genes in Keratinocyte Overexpression from PMID: 30772301 | SOX2 |
| AZIN2    | SOX2 regulated genes in Keratinocyte Overexpression from PMID: 30772301 | SOX2 |
| INTS5    | SOX2 regulated genes in Keratinocyte Overexpression from PMID: 30772301 | SOX2 |
| SULT2B1  | SOX2 regulated genes in Keratinocyte Overexpression from PMID: 30772301 | SOX2 |
| ALOX15B  | SOX2 regulated genes in Keratinocyte Overexpression from PMID: 30772301 | SOX2 |
| TIMM17A  | SOX2 regulated genes in Keratinocyte Overexpression from PMID: 30772301 | SOX2 |
| CCNL1    | SOX2 regulated genes in Keratinocyte Overexpression from PMID: 30772301 | SOX2 |
| KLHL29   | SOX2 regulated genes in Keratinocyte Overexpression from PMID: 30772301 | SOX2 |
| RAD54L2  | SOX2 regulated genes in Keratinocyte Overexpression from PMID: 30772301 | SOX2 |
| LLGL2    | SOX2 regulated genes in Keratinocyte Overexpression from PMID: 30772301 | SOX2 |
| CYBRD1   | SOX2 regulated genes in Keratinocyte Overexpression from PMID: 30772301 | SOX2 |
| DPY30    | SOX2 regulated genes in Keratinocyte Overexpression from PMID: 30772301 | SOX2 |

|         |                                                                         |      |
|---------|-------------------------------------------------------------------------|------|
| C2orf69 | SOX2 regulated genes in Keratinocyte Overexpression from PMID: 30772301 | SOX2 |
| CEP83   | SOX2 regulated genes in Keratinocyte Overexpression from PMID: 30772301 | SOX2 |
| NCAPD3  | SOX2 regulated genes in Keratinocyte Overexpression from PMID: 30772301 | SOX2 |
| RNF220  | SOX2 regulated genes in Keratinocyte Overexpression from PMID: 30772301 | SOX2 |
| USP42   | SOX2 regulated genes in Keratinocyte Overexpression from PMID: 30772301 | SOX2 |
| RFC4    | SOX2 regulated genes in Keratinocyte Overexpression from PMID: 30772301 | SOX2 |
| KCTD15  | SOX2 regulated genes in Keratinocyte Overexpression from PMID: 30772301 | SOX2 |
| ZNF239  | SOX2 regulated genes in Keratinocyte Overexpression from PMID: 30772301 | SOX2 |
| RSRC2   | SOX2 regulated genes in Keratinocyte Overexpression from PMID: 30772301 | SOX2 |
| RTKN    | SOX2 regulated genes in Keratinocyte Overexpression from PMID: 30772301 | SOX2 |
| ZNF780A | SOX2 regulated genes in Keratinocyte Overexpression from PMID: 30772301 | SOX2 |
| NVL     | SOX2 regulated genes in Keratinocyte Overexpression from PMID: 30772301 | SOX2 |
| TUFT1   | SOX2 regulated genes in Keratinocyte Overexpression from PMID: 30772301 | SOX2 |
| SRP19   | SOX2 regulated genes in Keratinocyte Overexpression from PMID: 30772301 | SOX2 |
| YARS2   | SOX2 regulated genes in Keratinocyte Overexpression from PMID: 30772301 | SOX2 |
| TDRD5   | SOX2 regulated genes in Keratinocyte Overexpression from PMID: 30772301 | SOX2 |
| RPS25   | SOX2 regulated genes in Keratinocyte Overexpression from PMID: 30772301 | SOX2 |
| ECT2    | SOX2 regulated genes in Keratinocyte Overexpression from PMID: 30772301 | SOX2 |
| MARK4   | SOX2 regulated genes in Keratinocyte Overexpression from PMID: 30772301 | SOX2 |
| GRM2    | SOX2 regulated genes in Keratinocyte Overexpression from PMID: 30772301 | SOX2 |
| ZNF180  | SOX2 regulated genes in Keratinocyte Overexpression from PMID: 30772301 | SOX2 |
| ACSM3   | SOX2 regulated genes in Keratinocyte Overexpression from PMID: 30772301 | SOX2 |
| PURA    | SOX2 regulated genes in Keratinocyte Overexpression from PMID: 30772301 | SOX2 |
| SCAF1   | SOX2 regulated genes in Keratinocyte Overexpression from PMID: 30772301 | SOX2 |
| ZBTB49  | SOX2 regulated genes in Keratinocyte Overexpression from PMID: 30772301 | SOX2 |
| FBXL14  | SOX2 regulated genes in Keratinocyte Overexpression from PMID: 30772301 | SOX2 |
| DDX41   | SOX2 regulated genes in Keratinocyte Overexpression from PMID: 30772301 | SOX2 |
| SLC30A6 | SOX2 regulated genes in Keratinocyte Overexpression from PMID: 30772301 | SOX2 |
| MRPL37  | SOX2 regulated genes in Keratinocyte Overexpression from PMID: 30772301 | SOX2 |
| OTUD7B  | SOX2 regulated genes in Keratinocyte Overexpression from PMID: 30772301 | SOX2 |
| UBE2J2  | SOX2 regulated genes in Keratinocyte Overexpression from PMID: 30772301 | SOX2 |
| HMGCS2  | SOX2 regulated genes in Keratinocyte Overexpression from PMID: 30772301 | SOX2 |
| SLC23A1 | SOX2 regulated genes in Keratinocyte Overexpression from PMID: 30772301 | SOX2 |
| STIL    | SOX2 regulated genes in Keratinocyte Overexpression from PMID: 30772301 | SOX2 |
| EIF3E   | SOX2 regulated genes in Keratinocyte Overexpression from PMID: 30772301 | SOX2 |
| COPS7B  | SOX2 regulated genes in Keratinocyte Overexpression from PMID: 30772301 | SOX2 |
| DPM3    | SOX2 regulated genes in Keratinocyte Overexpression from PMID: 30772301 | SOX2 |
| SLC6A15 | SOX2 regulated genes in Keratinocyte Overexpression from PMID: 30772301 | SOX2 |
| ENC1    | SOX2 regulated genes in Keratinocyte Overexpression from PMID: 30772301 | SOX2 |
| TIMM44  | SOX2 regulated genes in Keratinocyte Overexpression from PMID: 30772301 | SOX2 |
| CCDC106 | SOX2 regulated genes in Keratinocyte Overexpression from PMID: 30772301 | SOX2 |
| ZNF131  | SOX2 regulated genes in Keratinocyte Overexpression from PMID: 30772301 | SOX2 |
| PTP4A1  | SOX2 regulated genes in Keratinocyte Overexpression from PMID: 30772301 | SOX2 |
| UBIAD1  | SOX2 regulated genes in Keratinocyte Overexpression from PMID: 30772301 | SOX2 |
| SLC7A14 | SOX2 regulated genes in Keratinocyte Overexpression from PMID: 30772301 | SOX2 |
| MRPL12  | SOX2 regulated genes in Keratinocyte Overexpression from PMID: 30772301 | SOX2 |
| NUDT1   | SOX2 regulated genes in Keratinocyte Overexpression from PMID: 30772301 | SOX2 |
| TMEM138 | SOX2 regulated genes in Keratinocyte Overexpression from PMID: 30772301 | SOX2 |
| PBLD    | SOX2 regulated genes in Keratinocyte Overexpression from PMID: 30772301 | SOX2 |
| PRR14   | SOX2 regulated genes in Keratinocyte Overexpression from PMID: 30772301 | SOX2 |
| GGPS1   | SOX2 regulated genes in Keratinocyte Overexpression from PMID: 30772301 | SOX2 |
| SLC45A1 | SOX2 regulated genes in Keratinocyte Overexpression from PMID: 30772301 | SOX2 |
| PTHLH   | SOX2 regulated genes in Keratinocyte Overexpression from PMID: 30772301 | SOX2 |
| FAM83E  | SOX2 regulated genes in Keratinocyte Overexpression from PMID: 30772301 | SOX2 |
| KCNJ13  | SOX2 regulated genes in Keratinocyte Overexpression from PMID: 30772301 | SOX2 |
| COA7    | SOX2 regulated genes in Keratinocyte Overexpression from PMID: 30772301 | SOX2 |
| TOMM7   | SOX2 regulated genes in Keratinocyte Overexpression from PMID: 30772301 | SOX2 |
| KRAS    | SOX2 regulated genes in Keratinocyte Overexpression from PMID: 30772301 | SOX2 |
| HS2ST1  | SOX2 regulated genes in Keratinocyte Overexpression from PMID: 30772301 | SOX2 |

|              |                                                                         |      |
|--------------|-------------------------------------------------------------------------|------|
| NEK8         | SOX2 regulated genes in Keratinocyte Overexpression from PMID: 30772301 | SOX2 |
| ZNF23        | SOX2 regulated genes in Keratinocyte Overexpression from PMID: 30772301 | SOX2 |
| EPOP         | SOX2 regulated genes in Keratinocyte Overexpression from PMID: 30772301 | SOX2 |
| NT5E         | SOX2 regulated genes in Keratinocyte Overexpression from PMID: 30772301 | SOX2 |
| S100A1       | SOX2 regulated genes in Keratinocyte Overexpression from PMID: 30772301 | SOX2 |
| FUT1         | SOX2 regulated genes in Keratinocyte Overexpression from PMID: 30772301 | SOX2 |
| POLR3D       | SOX2 regulated genes in Keratinocyte Overexpression from PMID: 30772301 | SOX2 |
| EGFR         | SOX2 regulated genes in Keratinocyte Overexpression from PMID: 30772301 | SOX2 |
| ZNF446       | SOX2 regulated genes in Keratinocyte Overexpression from PMID: 30772301 | SOX2 |
| PIH1D2       | SOX2 regulated genes in Keratinocyte Overexpression from PMID: 30772301 | SOX2 |
| CDK5RAP2     | SOX2 regulated genes in Keratinocyte Overexpression from PMID: 30772301 | SOX2 |
| VPS37C       | SOX2 regulated genes in Keratinocyte Overexpression from PMID: 30772301 | SOX2 |
| GALK1        | SOX2 regulated genes in Keratinocyte Overexpression from PMID: 30772301 | SOX2 |
| G3BP1        | SOX2 regulated genes in Keratinocyte Overexpression from PMID: 30772301 | SOX2 |
| BBS2         | SOX2 regulated genes in Keratinocyte Overexpression from PMID: 30772301 | SOX2 |
| OVGP1        | SOX2 regulated genes in Keratinocyte Overexpression from PMID: 30772301 | SOX2 |
| FBXO33       | SOX2 regulated genes in Keratinocyte Overexpression from PMID: 30772301 | SOX2 |
| EPN3         | SOX2 regulated genes in Keratinocyte Overexpression from PMID: 30772301 | SOX2 |
| FOXO6        | SOX2 regulated genes in Keratinocyte Overexpression from PMID: 30772301 | SOX2 |
| ZDHHC1       | SOX2 regulated genes in Keratinocyte Overexpression from PMID: 30772301 | SOX2 |
| PHOSPHO2     | SOX2 regulated genes in Keratinocyte Overexpression from PMID: 30772301 | SOX2 |
| LRPPRC       | SOX2 regulated genes in Keratinocyte Overexpression from PMID: 30772301 | SOX2 |
| RNF2         | SOX2 regulated genes in Keratinocyte Overexpression from PMID: 30772301 | SOX2 |
| ALDH3B2      | SOX2 regulated genes in Keratinocyte Overexpression from PMID: 30772301 | SOX2 |
| BACE1        | SOX2 regulated genes in Keratinocyte Overexpression from PMID: 30772301 | SOX2 |
| ABCB6        | SOX2 regulated genes in Keratinocyte Overexpression from PMID: 30772301 | SOX2 |
| IMP3         | SOX2 regulated genes in Keratinocyte Overexpression from PMID: 30772301 | SOX2 |
| PSMD2        | SOX2 regulated genes in Keratinocyte Overexpression from PMID: 30772301 | SOX2 |
| KCNJ16       | SOX2 regulated genes in Keratinocyte Overexpression from PMID: 30772301 | SOX2 |
| LYG1         | SOX2 regulated genes in Keratinocyte Overexpression from PMID: 30772301 | SOX2 |
| ZNF251       | SOX2 regulated genes in Keratinocyte Overexpression from PMID: 30772301 | SOX2 |
| BANP         | SOX2 regulated genes in Keratinocyte Overexpression from PMID: 30772301 | SOX2 |
| TAMM41       | SOX2 regulated genes in Keratinocyte Overexpression from PMID: 30772301 | SOX2 |
| MIER2        | SOX2 regulated genes in Keratinocyte Overexpression from PMID: 30772301 | SOX2 |
| MAB21L3      | SOX2 regulated genes in Keratinocyte Overexpression from PMID: 30772301 | SOX2 |
| DAXX         | SOX2 regulated genes in Keratinocyte Overexpression from PMID: 30772301 | SOX2 |
| GIPR         | SOX2 regulated genes in Keratinocyte Overexpression from PMID: 30772301 | SOX2 |
| HOXD4        | SOX2 regulated genes in Keratinocyte Overexpression from PMID: 30772301 | SOX2 |
| DDX10        | SOX2 regulated genes in Keratinocyte Overexpression from PMID: 30772301 | SOX2 |
| NSD1         | SOX2 regulated genes in Keratinocyte Overexpression from PMID: 30772301 | SOX2 |
| ABHD14A-ACY1 | SOX2 regulated genes in Keratinocyte Overexpression from PMID: 30772301 | SOX2 |
| ACY1         | SOX2 regulated genes in Keratinocyte Overexpression from PMID: 30772301 | SOX2 |
| RAD9B        | SOX2 regulated genes in Keratinocyte Overexpression from PMID: 30772301 | SOX2 |
| CCDC71L      | SOX2 regulated genes in Keratinocyte Overexpression from PMID: 30772301 | SOX2 |
| MFN1         | SOX2 regulated genes in Keratinocyte Overexpression from PMID: 30772301 | SOX2 |
| SLC16A11     | SOX2 regulated genes in Keratinocyte Overexpression from PMID: 30772301 | SOX2 |
| CENPE        | SOX2 regulated genes in Keratinocyte Overexpression from PMID: 30772301 | SOX2 |
| PSMD6        | SOX2 regulated genes in Keratinocyte Overexpression from PMID: 30772301 | SOX2 |
| RHBDF2       | SOX2 regulated genes in Keratinocyte Overexpression from PMID: 30772301 | SOX2 |
| HMG20B       | SOX2 regulated genes in Keratinocyte Overexpression from PMID: 30772301 | SOX2 |
| ZSWIM4       | SOX2 regulated genes in Keratinocyte Overexpression from PMID: 30772301 | SOX2 |
| IFT122       | SOX2 regulated genes in Keratinocyte Overexpression from PMID: 30772301 | SOX2 |
| NOS1AP       | SOX2 regulated genes in Keratinocyte Overexpression from PMID: 30772301 | SOX2 |
| ANAPC13      | SOX2 regulated genes in Keratinocyte Overexpression from PMID: 30772301 | SOX2 |
| CDC23        | SOX2 regulated genes in Keratinocyte Overexpression from PMID: 30772301 | SOX2 |
| CLCN2        | SOX2 regulated genes in Keratinocyte Overexpression from PMID: 30772301 | SOX2 |
| ZNF445       | SOX2 regulated genes in Keratinocyte Overexpression from PMID: 30772301 | SOX2 |
| CDC73        | SOX2 regulated genes in Keratinocyte Overexpression from PMID: 30772301 | SOX2 |
| ASAP3        | SOX2 regulated genes in Keratinocyte Overexpression from PMID: 30772301 | SOX2 |

|           |                                                                         |      |
|-----------|-------------------------------------------------------------------------|------|
| RFNG      | SOX2 regulated genes in Keratinocyte Overexpression from PMID: 30772301 | SOX2 |
| LEMD3     | SOX2 regulated genes in Keratinocyte Overexpression from PMID: 30772301 | SOX2 |
| MAPK6     | SOX2 regulated genes in Keratinocyte Overexpression from PMID: 30772301 | SOX2 |
| ZNF628    | SOX2 regulated genes in Keratinocyte Overexpression from PMID: 30772301 | SOX2 |
| IMMT      | SOX2 regulated genes in Keratinocyte Overexpression from PMID: 30772301 | SOX2 |
| AKT1S1    | SOX2 regulated genes in Keratinocyte Overexpression from PMID: 30772301 | SOX2 |
| RPAP1     | SOX2 regulated genes in Keratinocyte Overexpression from PMID: 30772301 | SOX2 |
| TAF12     | SOX2 regulated genes in Keratinocyte Overexpression from PMID: 30772301 | SOX2 |
| MFSD3     | SOX2 regulated genes in Keratinocyte Overexpression from PMID: 30772301 | SOX2 |
| KIAA0895L | SOX2 regulated genes in Keratinocyte Overexpression from PMID: 30772301 | SOX2 |
| ERCC8     | SOX2 regulated genes in Keratinocyte Overexpression from PMID: 30772301 | SOX2 |
| TRIM62    | SOX2 regulated genes in Keratinocyte Overexpression from PMID: 30772301 | SOX2 |
| YAF2      | SOX2 regulated genes in Keratinocyte Overexpression from PMID: 30772301 | SOX2 |
| GTF2H5    | SOX2 regulated genes in Keratinocyte Overexpression from PMID: 30772301 | SOX2 |
| NDUFA7    | SOX2 regulated genes in Keratinocyte Overexpression from PMID: 30772301 | SOX2 |
| MSI2      | SOX2 regulated genes in Keratinocyte Overexpression from PMID: 30772301 | SOX2 |
| ABHD17A   | SOX2 regulated genes in Keratinocyte Overexpression from PMID: 30772301 | SOX2 |
| PLEKHJ1   | SOX2 regulated genes in Keratinocyte Overexpression from PMID: 30772301 | SOX2 |
| TAF15     | SOX2 regulated genes in Keratinocyte Overexpression from PMID: 30772301 | SOX2 |
| NMNAT3    | SOX2 regulated genes in Keratinocyte Overexpression from PMID: 30772301 | SOX2 |
| ZNF575    | SOX2 regulated genes in Keratinocyte Overexpression from PMID: 30772301 | SOX2 |
| UBXN8     | SOX2 regulated genes in Keratinocyte Overexpression from PMID: 30772301 | SOX2 |
| GZMM      | SOX2 regulated genes in Keratinocyte Overexpression from PMID: 30772301 | SOX2 |
| ASPM      | SOX2 regulated genes in Keratinocyte Overexpression from PMID: 30772301 | SOX2 |
| ZNF700    | SOX2 regulated genes in Keratinocyte Overexpression from PMID: 30772301 | SOX2 |
| ZNF878    | SOX2 regulated genes in Keratinocyte Overexpression from PMID: 30772301 | SOX2 |
| WDR35     | SOX2 regulated genes in Keratinocyte Overexpression from PMID: 30772301 | SOX2 |
| NME5      | SOX2 regulated genes in Keratinocyte Overexpression from PMID: 30772301 | SOX2 |
| STXBP2    | SOX2 regulated genes in Keratinocyte Overexpression from PMID: 30772301 | SOX2 |
| SZT2      | SOX2 regulated genes in Keratinocyte Overexpression from PMID: 30772301 | SOX2 |
| MRFAP1L1  | SOX2 regulated genes in Keratinocyte Overexpression from PMID: 30772301 | SOX2 |
| MRFAP1    | SOX2 regulated genes in Keratinocyte Overexpression from PMID: 30772301 | SOX2 |
| CACTIN    | SOX2 regulated genes in Keratinocyte Overexpression from PMID: 30772301 | SOX2 |
| HPCA      | SOX2 regulated genes in Keratinocyte Overexpression from PMID: 30772301 | SOX2 |
| PGLS      | SOX2 regulated genes in Keratinocyte Overexpression from PMID: 30772301 | SOX2 |
| NAPA      | SOX2 regulated genes in Keratinocyte Overexpression from PMID: 30772301 | SOX2 |
| PRIM1     | SOX2 regulated genes in Keratinocyte Overexpression from PMID: 30772301 | SOX2 |
| SLC20A1   | SOX2 regulated genes in Keratinocyte Overexpression from PMID: 30772301 | SOX2 |
| BBS5      | SOX2 regulated genes in Keratinocyte Overexpression from PMID: 30772301 | SOX2 |
| GPA33     | SOX2 regulated genes in Keratinocyte Overexpression from PMID: 30772301 | SOX2 |
| NOTUM     | SOX2 regulated genes in Keratinocyte Overexpression from PMID: 30772301 | SOX2 |
| RPS9      | SOX2 regulated genes in Keratinocyte Overexpression from PMID: 30772301 | SOX2 |
| PCYT2     | SOX2 regulated genes in Keratinocyte Overexpression from PMID: 30772301 | SOX2 |
| ASCL4     | SOX2 regulated genes in Keratinocyte Overexpression from PMID: 30772301 | SOX2 |
| DNAH9     | SOX2 regulated genes in Keratinocyte Overexpression from PMID: 30772301 | SOX2 |
| CIB1      | SOX2 regulated genes in Keratinocyte Overexpression from PMID: 30772301 | SOX2 |
| CAMSAP2   | SOX2 regulated genes in Keratinocyte Overexpression from PMID: 30772301 | SOX2 |
| ATG4D     | SOX2 regulated genes in Keratinocyte Overexpression from PMID: 30772301 | SOX2 |
| ABCB10    | SOX2 regulated genes in Keratinocyte Overexpression from PMID: 30772301 | SOX2 |
| ABTB1     | SOX2 regulated genes in Keratinocyte Overexpression from PMID: 30772301 | SOX2 |
| SLC12A8   | SOX2 regulated genes in Keratinocyte Overexpression from PMID: 30772301 | SOX2 |
| MAT2A     | SOX2 regulated genes in Keratinocyte Overexpression from PMID: 30772301 | SOX2 |
| CYP4F11   | SOX2 regulated genes in Keratinocyte Overexpression from PMID: 30772301 | SOX2 |
| CYP4A11   | SOX2 regulated genes in Keratinocyte Overexpression from PMID: 30772301 | SOX2 |
| GNB1      | SOX2 regulated genes in Keratinocyte Overexpression from PMID: 30772301 | SOX2 |
| IER2      | SOX2 regulated genes in Keratinocyte Overexpression from PMID: 30772301 | SOX2 |
| RBAK      | SOX2 regulated genes in Keratinocyte Overexpression from PMID: 30772301 | SOX2 |
| PODXL2    | SOX2 regulated genes in Keratinocyte Overexpression from PMID: 30772301 | SOX2 |
| MARVELD2  | SOX2 regulated genes in Keratinocyte Overexpression from PMID: 30772301 | SOX2 |

|          |                                                                         |      |
|----------|-------------------------------------------------------------------------|------|
| POLD1    | SOX2 regulated genes in Keratinocyte Overexpression from PMID: 30772301 | SOX2 |
| RPL28    | SOX2 regulated genes in Keratinocyte Overexpression from PMID: 30772301 | SOX2 |
| BMPR2    | SOX2 regulated genes in Keratinocyte Overexpression from PMID: 30772301 | SOX2 |
| LARP7    | SOX2 regulated genes in Keratinocyte Overexpression from PMID: 30772301 | SOX2 |
| VIL1     | SOX2 regulated genes in Keratinocyte Overexpression from PMID: 30772301 | SOX2 |
| TIMM29   | SOX2 regulated genes in Keratinocyte Overexpression from PMID: 30772301 | SOX2 |
| PARPBP   | SOX2 regulated genes in Keratinocyte Overexpression from PMID: 30772301 | SOX2 |
| TMC6     | SOX2 regulated genes in Keratinocyte Overexpression from PMID: 30772301 | SOX2 |
| FAM222B  | SOX2 regulated genes in Keratinocyte Overexpression from PMID: 30772301 | SOX2 |
| CUL1     | SOX2 regulated genes in Keratinocyte Overexpression from PMID: 30772301 | SOX2 |
| GOLGA7   | SOX2 regulated genes in Keratinocyte Overexpression from PMID: 30772301 | SOX2 |
| SRSF11   | SOX2 regulated genes in Keratinocyte Overexpression from PMID: 30772301 | SOX2 |
| INO80B   | SOX2 regulated genes in Keratinocyte Overexpression from PMID: 30772301 | SOX2 |
| ZNF574   | SOX2 regulated genes in Keratinocyte Overexpression from PMID: 30772301 | SOX2 |
| C19orf25 | SOX2 regulated genes in Keratinocyte Overexpression from PMID: 30772301 | SOX2 |
| RASSF1   | SOX2 regulated genes in Keratinocyte Overexpression from PMID: 30772301 | SOX2 |
| CIT      | SOX2 regulated genes in Keratinocyte Overexpression from PMID: 30772301 | SOX2 |
| CDC42EP3 | SOX2 regulated genes in Keratinocyte Overexpression from PMID: 30772301 | SOX2 |
| DPYSL4   | SOX2 regulated genes in Keratinocyte Overexpression from PMID: 30772301 | SOX2 |
| CCDC73   | SOX2 regulated genes in Keratinocyte Overexpression from PMID: 30772301 | SOX2 |
| PRRT3    | SOX2 regulated genes in Keratinocyte Overexpression from PMID: 30772301 | SOX2 |
| SPTBN2   | SOX2 regulated genes in Keratinocyte Overexpression from PMID: 30772301 | SOX2 |
| RYK      | SOX2 regulated genes in Keratinocyte Overexpression from PMID: 30772301 | SOX2 |
| SPINT2   | SOX2 regulated genes in Keratinocyte Overexpression from PMID: 30772301 | SOX2 |
| IFT20    | SOX2 regulated genes in Keratinocyte Overexpression from PMID: 30772301 | SOX2 |
| PTRHD1   | SOX2 regulated genes in Keratinocyte Overexpression from PMID: 30772301 | SOX2 |
| CCDC43   | SOX2 regulated genes in Keratinocyte Overexpression from PMID: 30772301 | SOX2 |
| DCTN2    | SOX2 regulated genes in Keratinocyte Overexpression from PMID: 30772301 | SOX2 |
| LRRC46   | SOX2 regulated genes in Keratinocyte Overexpression from PMID: 30772301 | SOX2 |
| TAF1A    | SOX2 regulated genes in Keratinocyte Overexpression from PMID: 30772301 | SOX2 |
| AAMP     | SOX2 regulated genes in Keratinocyte Overexpression from PMID: 30772301 | SOX2 |
| ACVR1B   | SOX2 regulated genes in Keratinocyte Overexpression from PMID: 30772301 | SOX2 |
| CCDC74B  | SOX2 regulated genes in Keratinocyte Overexpression from PMID: 30772301 | SOX2 |
| CCDC74A  | SOX2 regulated genes in Keratinocyte Overexpression from PMID: 30772301 | SOX2 |
| SFTPC    | SOX2 regulated genes in Keratinocyte Overexpression from PMID: 30772301 | SOX2 |
| AHSA1    | SOX2 regulated genes in Keratinocyte Overexpression from PMID: 30772301 | SOX2 |
| RNF145   | SOX2 regulated genes in Keratinocyte Overexpression from PMID: 30772301 | SOX2 |
| CXCL12   | SOX2 regulated genes in Keratinocyte Overexpression from PMID: 30772301 | SOX2 |
| SNCAIP   | SOX2 regulated genes in Keratinocyte Overexpression from PMID: 30772301 | SOX2 |
| TADA1    | SOX2 regulated genes in Keratinocyte Overexpression from PMID: 30772301 | SOX2 |
| IGSF3    | SOX2 regulated genes in Keratinocyte Overexpression from PMID: 30772301 | SOX2 |
| CENPO    | SOX2 regulated genes in Keratinocyte Overexpression from PMID: 30772301 | SOX2 |
| RBM12B   | SOX2 regulated genes in Keratinocyte Overexpression from PMID: 30772301 | SOX2 |
| APPBP2   | SOX2 regulated genes in Keratinocyte Overexpression from PMID: 30772301 | SOX2 |
| TMEM186  | SOX2 regulated genes in Keratinocyte Overexpression from PMID: 30772301 | SOX2 |
| EZR      | SOX2 regulated genes in Keratinocyte Overexpression from PMID: 30772301 | SOX2 |
| TTC21B   | SOX2 regulated genes in Keratinocyte Overexpression from PMID: 30772301 | SOX2 |
| FANCD2   | SOX2 regulated genes in Keratinocyte Overexpression from PMID: 30772301 | SOX2 |
| ACOT1    | SOX2 regulated genes in Keratinocyte Overexpression from PMID: 30772301 | SOX2 |
| ACOT2    | SOX2 regulated genes in Keratinocyte Overexpression from PMID: 30772301 | SOX2 |
| SSX2IP   | SOX2 regulated genes in Keratinocyte Overexpression from PMID: 30772301 | SOX2 |
| TCOF1    | SOX2 regulated genes in Keratinocyte Overexpression from PMID: 30772301 | SOX2 |
| ZNF205   | SOX2 regulated genes in Keratinocyte Overexpression from PMID: 30772301 | SOX2 |
| MAFK     | SOX2 regulated genes in Keratinocyte Overexpression from PMID: 30772301 | SOX2 |
| LIN7B    | SOX2 regulated genes in Keratinocyte Overexpression from PMID: 30772301 | SOX2 |
| DUSP7    | SOX2 regulated genes in Keratinocyte Overexpression from PMID: 30772301 | SOX2 |
| NOTCH3   | SOX2 regulated genes in Keratinocyte Overexpression from PMID: 30772301 | SOX2 |
| CFHR2    | SOX2 regulated genes in Keratinocyte Overexpression from PMID: 30772301 | SOX2 |
| CFAP36   | SOX2 regulated genes in Keratinocyte Overexpression from PMID: 30772301 | SOX2 |

|            |                                                                         |      |
|------------|-------------------------------------------------------------------------|------|
| ZNF845     | SOX2 regulated genes in Keratinocyte Overexpression from PMID: 30772301 | SOX2 |
| CTNND1     | SOX2 regulated genes in Keratinocyte Overexpression from PMID: 30772301 | SOX2 |
| ZNF777     | SOX2 regulated genes in Keratinocyte Overexpression from PMID: 30772301 | SOX2 |
| APLP1      | SOX2 regulated genes in Keratinocyte Overexpression from PMID: 30772301 | SOX2 |
| TMEM231    | SOX2 regulated genes in Keratinocyte Overexpression from PMID: 30772301 | SOX2 |
| CRTC2      | SOX2 regulated genes in Keratinocyte Overexpression from PMID: 30772301 | SOX2 |
| FAM8A1     | SOX2 regulated genes in Keratinocyte Overexpression from PMID: 30772301 | SOX2 |
| TMEM54     | SOX2 regulated genes in Keratinocyte Overexpression from PMID: 30772301 | SOX2 |
| HNRNPUL1   | SOX2 regulated genes in Keratinocyte Overexpression from PMID: 30772301 | SOX2 |
| CYB5R2     | SOX2 regulated genes in Keratinocyte Overexpression from PMID: 30772301 | SOX2 |
| BCL9       | SOX2 regulated genes in Keratinocyte Overexpression from PMID: 30772301 | SOX2 |
| FAM189A1   | SOX2 regulated genes in Keratinocyte Overexpression from PMID: 30772301 | SOX2 |
| OSCAR      | SOX2 regulated genes in Keratinocyte Overexpression from PMID: 30772301 | SOX2 |
| DYNC111    | SOX2 regulated genes in Keratinocyte Overexpression from PMID: 30772301 | SOX2 |
| ZNF286A    | SOX2 regulated genes in Keratinocyte Overexpression from PMID: 30772301 | SOX2 |
| RHOB       | SOX2 regulated genes in Keratinocyte Overexpression from PMID: 30772301 | SOX2 |
| MRPL43     | SOX2 regulated genes in Keratinocyte Overexpression from PMID: 30772301 | SOX2 |
| KMT2D      | SOX2 regulated genes in Keratinocyte Overexpression from PMID: 30772301 | SOX2 |
| SRRM1      | SOX2 regulated genes in Keratinocyte Overexpression from PMID: 30772301 | SOX2 |
| SRSF10     | SOX2 regulated genes in Keratinocyte Overexpression from PMID: 30772301 | SOX2 |
| GPBP1L1    | SOX2 regulated genes in Keratinocyte Overexpression from PMID: 30772301 | SOX2 |
| ADGRB1     | SOX2 regulated genes in Keratinocyte Overexpression from PMID: 30772301 | SOX2 |
| PYCR3      | SOX2 regulated genes in Keratinocyte Overexpression from PMID: 30772301 | SOX2 |
| FAM98A     | SOX2 regulated genes in Keratinocyte Overexpression from PMID: 30772301 | SOX2 |
| STARD10    | SOX2 regulated genes in Keratinocyte Overexpression from PMID: 30772301 | SOX2 |
| CSNK1G2    | SOX2 regulated genes in Keratinocyte Overexpression from PMID: 30772301 | SOX2 |
| TRIP12     | SOX2 regulated genes in Keratinocyte Overexpression from PMID: 30772301 | SOX2 |
| WWTR1      | SOX2 regulated genes in Keratinocyte Overexpression from PMID: 30772301 | SOX2 |
| C2CD3      | SOX2 regulated genes in Keratinocyte Overexpression from PMID: 30772301 | SOX2 |
| SLC25A39   | SOX2 regulated genes in Keratinocyte Overexpression from PMID: 30772301 | SOX2 |
| NACA       | SOX2 regulated genes in Keratinocyte Overexpression from PMID: 30772301 | SOX2 |
| MAP2K2     | SOX2 regulated genes in Keratinocyte Overexpression from PMID: 30772301 | SOX2 |
| WDR6       | SOX2 regulated genes in Keratinocyte Overexpression from PMID: 30772301 | SOX2 |
| TMEM216    | SOX2 regulated genes in Keratinocyte Overexpression from PMID: 30772301 | SOX2 |
| XPO1       | SOX2 regulated genes in Keratinocyte Overexpression from PMID: 30772301 | SOX2 |
| FAM53C     | SOX2 regulated genes in Keratinocyte Overexpression from PMID: 30772301 | SOX2 |
| SHANK2     | SOX2 regulated genes in Keratinocyte Overexpression from PMID: 30772301 | SOX2 |
| CEBPZ      | SOX2 regulated genes in Keratinocyte Overexpression from PMID: 30772301 | SOX2 |
| CNOT1      | SOX2 regulated genes in Keratinocyte Overexpression from PMID: 30772301 | SOX2 |
| CTF1       | SOX2 regulated genes in Keratinocyte Overexpression from PMID: 30772301 | SOX2 |
| RPL19      | SOX2 regulated genes in Keratinocyte Overexpression from PMID: 30772301 | SOX2 |
| C19orf33   | SOX2 regulated genes in Keratinocyte Overexpression from PMID: 30772301 | SOX2 |
| ELP6       | SOX2 regulated genes in Keratinocyte Overexpression from PMID: 30772301 | SOX2 |
| NAA38      | SOX2 regulated genes in Keratinocyte Overexpression from PMID: 30772301 | SOX2 |
| LRRN2      | SOX2 regulated genes in Keratinocyte Overexpression from PMID: 30772301 | SOX2 |
| SCCPDH     | SOX2 regulated genes in Keratinocyte Overexpression from PMID: 30772301 | SOX2 |
| ARHGAP33   | SOX2 regulated genes in Keratinocyte Overexpression from PMID: 30772301 | SOX2 |
| TMEM161B   | SOX2 regulated genes in Keratinocyte Overexpression from PMID: 30772301 | SOX2 |
| RELL2      | SOX2 regulated genes in Keratinocyte Overexpression from PMID: 30772301 | SOX2 |
| KCNJ14     | SOX2 regulated genes in Keratinocyte Overexpression from PMID: 30772301 | SOX2 |
| SPINK8     | SOX2 regulated genes in Keratinocyte Overexpression from PMID: 30772301 | SOX2 |
| LSM14A     | SOX2 regulated genes in Keratinocyte Overexpression from PMID: 30772301 | SOX2 |
| METRNL     | SOX2 regulated genes in Keratinocyte Overexpression from PMID: 30772301 | SOX2 |
| HSD11B2    | SOX2 regulated genes in Keratinocyte Overexpression from PMID: 30772301 | SOX2 |
| DCAF7      | SOX2 regulated genes in Keratinocyte Overexpression from PMID: 30772301 | SOX2 |
| ANKRD22    | SOX2 regulated genes in Keratinocyte Overexpression from PMID: 30772301 | SOX2 |
| ZCRB1      | SOX2 regulated genes in Keratinocyte Overexpression from PMID: 30772301 | SOX2 |
| ACAN       | SOX2 regulated genes in Keratinocyte Overexpression from PMID: 30772301 | SOX2 |
| GADD45GIP1 | SOX2 regulated genes in Keratinocyte Overexpression from PMID: 30772301 | SOX2 |

|          |                                                                         |      |
|----------|-------------------------------------------------------------------------|------|
| NKPD1    | SOX2 regulated genes in Keratinocyte Overexpression from PMID: 30772301 | SOX2 |
| HOXD8    | SOX2 regulated genes in Keratinocyte Overexpression from PMID: 30772301 | SOX2 |
| ARHGAP20 | SOX2 regulated genes in Keratinocyte Overexpression from PMID: 30772301 | SOX2 |
| WDR89    | SOX2 regulated genes in Keratinocyte Overexpression from PMID: 30772301 | SOX2 |
| SENP2    | SOX2 regulated genes in Keratinocyte Overexpression from PMID: 30772301 | SOX2 |
| ELMOD3   | SOX2 regulated genes in Keratinocyte Overexpression from PMID: 30772301 | SOX2 |
| TCERG1   | SOX2 regulated genes in Keratinocyte Overexpression from PMID: 30772301 | SOX2 |
| CCDC174  | SOX2 regulated genes in Keratinocyte Overexpression from PMID: 30772301 | SOX2 |
| PRCC     | SOX2 regulated genes in Keratinocyte Overexpression from PMID: 30772301 | SOX2 |
| DBI      | SOX2 regulated genes in Keratinocyte Overexpression from PMID: 30772301 | SOX2 |
| NEMF     | SOX2 regulated genes in Keratinocyte Overexpression from PMID: 30772301 | SOX2 |
| ZNF326   | SOX2 regulated genes in Keratinocyte Overexpression from PMID: 30772301 | SOX2 |
| ITGB3BP  | SOX2 regulated genes in Keratinocyte Overexpression from PMID: 30772301 | SOX2 |
| JAGN1    | SOX2 regulated genes in Keratinocyte Overexpression from PMID: 30772301 | SOX2 |
| SIPA1L2  | SOX2 regulated genes in Keratinocyte Overexpression from PMID: 30772301 | SOX2 |
| XPO7     | SOX2 regulated genes in Keratinocyte Overexpression from PMID: 30772301 | SOX2 |
| ELOF1    | SOX2 regulated genes in Keratinocyte Overexpression from PMID: 30772301 | SOX2 |
| SPG7     | SOX2 regulated genes in Keratinocyte Overexpression from PMID: 30772301 | SOX2 |
| DIMT1    | SOX2 regulated genes in Keratinocyte Overexpression from PMID: 30772301 | SOX2 |
| RPS23    | SOX2 regulated genes in Keratinocyte Overexpression from PMID: 30772301 | SOX2 |
| ARL6IP6  | SOX2 regulated genes in Keratinocyte Overexpression from PMID: 30772301 | SOX2 |
| WNT4     | SOX2 regulated genes in Keratinocyte Overexpression from PMID: 30772301 | SOX2 |
| LMBRD2   | SOX2 regulated genes in Keratinocyte Overexpression from PMID: 30772301 | SOX2 |
| ZNF358   | SOX2 regulated genes in Keratinocyte Overexpression from PMID: 30772301 | SOX2 |
| ANKRD13C | SOX2 regulated genes in Keratinocyte Overexpression from PMID: 30772301 | SOX2 |
| GNL1     | SOX2 regulated genes in Keratinocyte Overexpression from PMID: 30772301 | SOX2 |
| PTCD3    | SOX2 regulated genes in Keratinocyte Overexpression from PMID: 30772301 | SOX2 |
| PKP1     | SOX2 regulated genes in Keratinocyte Overexpression from PMID: 30772301 | SOX2 |
| ZNF579   | SOX2 regulated genes in Keratinocyte Overexpression from PMID: 30772301 | SOX2 |
| MME      | SOX2 regulated genes in Keratinocyte Overexpression from PMID: 30772301 | SOX2 |
| PUM2     | SOX2 regulated genes in Keratinocyte Overexpression from PMID: 30772301 | SOX2 |
| DDX20    | SOX2 regulated genes in Keratinocyte Overexpression from PMID: 30772301 | SOX2 |
| MLPH     | SOX2 regulated genes in Keratinocyte Overexpression from PMID: 30772301 | SOX2 |
| KRT20    | SOX2 regulated genes in Keratinocyte Overexpression from PMID: 30772301 | SOX2 |
| MSTO1    | SOX2 regulated genes in Keratinocyte Overexpression from PMID: 30772301 | SOX2 |
| DHX30    | SOX2 regulated genes in Keratinocyte Overexpression from PMID: 30772301 | SOX2 |
| NECAB2   | SOX2 regulated genes in Keratinocyte Overexpression from PMID: 30772301 | SOX2 |
| RNF126   | SOX2 regulated genes in Keratinocyte Overexpression from PMID: 30772301 | SOX2 |
| NFYC     | SOX2 regulated genes in Keratinocyte Overexpression from PMID: 30772301 | SOX2 |
| ALKBH3   | SOX2 regulated genes in Keratinocyte Overexpression from PMID: 30772301 | SOX2 |
| GUCY2D   | SOX2 regulated genes in Keratinocyte Overexpression from PMID: 30772301 | SOX2 |
| MARK2    | SOX2 regulated genes in Keratinocyte Overexpression from PMID: 30772301 | SOX2 |
| SLC25A10 | SOX2 regulated genes in Keratinocyte Overexpression from PMID: 30772301 | SOX2 |
| RNASET2  | SOX2 regulated genes in Keratinocyte Overexpression from PMID: 30772301 | SOX2 |
| CEP97    | SOX2 regulated genes in Keratinocyte Overexpression from PMID: 30772301 | SOX2 |
| RPL24    | SOX2 regulated genes in Keratinocyte Overexpression from PMID: 30772301 | SOX2 |
| ORC4     | SOX2 regulated genes in Keratinocyte Overexpression from PMID: 30772301 | SOX2 |
| SNRNP48  | SOX2 regulated genes in Keratinocyte Overexpression from PMID: 30772301 | SOX2 |
| CYSTM1   | SOX2 regulated genes in Keratinocyte Overexpression from PMID: 30772301 | SOX2 |
| ZNF623   | SOX2 regulated genes in Keratinocyte Overexpression from PMID: 30772301 | SOX2 |
| ZNF781   | SOX2 regulated genes in Keratinocyte Overexpression from PMID: 30772301 | SOX2 |
| ARFIP2   | SOX2 regulated genes in Keratinocyte Overexpression from PMID: 30772301 | SOX2 |
| HNRNPH1  | SOX2 regulated genes in Keratinocyte Overexpression from PMID: 30772301 | SOX2 |
| WBP1     | SOX2 regulated genes in Keratinocyte Overexpression from PMID: 30772301 | SOX2 |
| EML2     | SOX2 regulated genes in Keratinocyte Overexpression from PMID: 30772301 | SOX2 |
| BRD8     | SOX2 regulated genes in Keratinocyte Overexpression from PMID: 30772301 | SOX2 |
| TUBA1C   | SOX2 regulated genes in Keratinocyte Overexpression from PMID: 30772301 | SOX2 |
| CMTM4    | SOX2 regulated genes in Keratinocyte Overexpression from PMID: 30772301 | SOX2 |
| CD9      | SOX2 regulated genes in Keratinocyte Overexpression from PMID: 30772301 | SOX2 |



|           |                                                                         |      |
|-----------|-------------------------------------------------------------------------|------|
| ZNF672    | SOX2 regulated genes in Keratinocyte Overexpression from PMID: 30772301 | SOX2 |
| CHTOP     | SOX2 regulated genes in Keratinocyte Overexpression from PMID: 30772301 | SOX2 |
| TMEM218   | SOX2 regulated genes in Keratinocyte Overexpression from PMID: 30772301 | SOX2 |
| PEF1      | SOX2 regulated genes in Keratinocyte Overexpression from PMID: 30772301 | SOX2 |
| COG1      | SOX2 regulated genes in Keratinocyte Overexpression from PMID: 30772301 | SOX2 |
| IL1F10    | SOX2 regulated genes in Keratinocyte Overexpression from PMID: 30772301 | SOX2 |
| SAMD4B    | SOX2 regulated genes in Keratinocyte Overexpression from PMID: 30772301 | SOX2 |
| ERBB2     | SOX2 regulated genes in Keratinocyte Overexpression from PMID: 30772301 | SOX2 |
| NOM1      | SOX2 regulated genes in Keratinocyte Overexpression from PMID: 30772301 | SOX2 |
| VAV3      | SOX2 regulated genes in Keratinocyte Overexpression from PMID: 30772301 | SOX2 |
| DAPL1     | SOX2 regulated genes in Keratinocyte Overexpression from PMID: 30772301 | SOX2 |
| RHBDD2    | SOX2 regulated genes in Keratinocyte Overexpression from PMID: 30772301 | SOX2 |
| SH3BP5L   | SOX2 regulated genes in Keratinocyte Overexpression from PMID: 30772301 | SOX2 |
| TPGS1     | SOX2 regulated genes in Keratinocyte Overexpression from PMID: 30772301 | SOX2 |
| KRTAP2-3  | SOX2 regulated genes in Keratinocyte Overexpression from PMID: 30772301 | SOX2 |
| KRTAP4-11 | SOX2 regulated genes in Keratinocyte Overexpression from PMID: 30772301 | SOX2 |
| KRTAP4-8  | SOX2 regulated genes in Keratinocyte Overexpression from PMID: 30772301 | SOX2 |
| NACC1     | SOX2 regulated genes in Keratinocyte Overexpression from PMID: 30772301 | SOX2 |
| RNF26     | SOX2 regulated genes in Keratinocyte Overexpression from PMID: 30772301 | SOX2 |
| WNT9A     | SOX2 regulated genes in Keratinocyte Overexpression from PMID: 30772301 | SOX2 |
| HCAR1     | SOX2 regulated genes in Keratinocyte Overexpression from PMID: 30772301 | SOX2 |
| DHFR2     | SOX2 regulated genes in Keratinocyte Overexpression from PMID: 30772301 | SOX2 |
| TBP       | SOX2 regulated genes in Keratinocyte Overexpression from PMID: 30772301 | SOX2 |
| CAMSAP3   | SOX2 regulated genes in Keratinocyte Overexpression from PMID: 30772301 | SOX2 |
| MDM1      | SOX2 regulated genes in Keratinocyte Overexpression from PMID: 30772301 | SOX2 |
| CDC42EP4  | SOX2 regulated genes in Keratinocyte Overexpression from PMID: 30772301 | SOX2 |
| MOB2      | SOX2 regulated genes in Keratinocyte Overexpression from PMID: 30772301 | SOX2 |
| C5orf22   | SOX2 regulated genes in Keratinocyte Overexpression from PMID: 30772301 | SOX2 |
| JMJD6     | SOX2 regulated genes in Keratinocyte Overexpression from PMID: 30772301 | SOX2 |
| ELL       | SOX2 regulated genes in Keratinocyte Overexpression from PMID: 30772301 | SOX2 |
| RCCD1     | SOX2 regulated genes in Keratinocyte Overexpression from PMID: 30772301 | SOX2 |
| THOC7     | SOX2 regulated genes in Keratinocyte Overexpression from PMID: 30772301 | SOX2 |
| UGT1A6    | SOX2 regulated genes in Keratinocyte Overexpression from PMID: 30772301 | SOX2 |
| MED16     | SOX2 regulated genes in Keratinocyte Overexpression from PMID: 30772301 | SOX2 |
| VEZT      | SOX2 regulated genes in Keratinocyte Overexpression from PMID: 30772301 | SOX2 |
| SNRNP25   | SOX2 regulated genes in Keratinocyte Overexpression from PMID: 30772301 | SOX2 |
| RNF19B    | SOX2 regulated genes in Keratinocyte Overexpression from PMID: 30772301 | SOX2 |
| DDX49     | SOX2 regulated genes in Keratinocyte Overexpression from PMID: 30772301 | SOX2 |
| BAZ2B     | SOX2 regulated genes in Keratinocyte Overexpression from PMID: 30772301 | SOX2 |
| MUTYH     | SOX2 regulated genes in Keratinocyte Overexpression from PMID: 30772301 | SOX2 |
| DDX55     | SOX2 regulated genes in Keratinocyte Overexpression from PMID: 30772301 | SOX2 |
| EIF4G1    | SOX2 regulated genes in Keratinocyte Overexpression from PMID: 30772301 | SOX2 |
| VPS37B    | SOX2 regulated genes in Keratinocyte Overexpression from PMID: 30772301 | SOX2 |
| ATP13A3   | SOX2 regulated genes in Keratinocyte Overexpression from PMID: 30772301 | SOX2 |
| RPL26     | SOX2 regulated genes in Keratinocyte Overexpression from PMID: 30772301 | SOX2 |
| PLK2      | SOX2 regulated genes in Keratinocyte Overexpression from PMID: 30772301 | SOX2 |
| SPRY4     | SOX2 regulated genes in Keratinocyte Overexpression from PMID: 30772301 | SOX2 |
| SPATA2L   | SOX2 regulated genes in Keratinocyte Overexpression from PMID: 30772301 | SOX2 |
| EXOC3L4   | SOX2 regulated genes in Keratinocyte Overexpression from PMID: 30772301 | SOX2 |
| F2RL1     | SOX2 regulated genes in Keratinocyte Overexpression from PMID: 30772301 | SOX2 |
| KRT23     | SOX2 regulated genes in Keratinocyte Overexpression from PMID: 30772301 | SOX2 |
| ULK1      | SOX2 regulated genes in Keratinocyte Overexpression from PMID: 30772301 | SOX2 |
| C19orf67  | SOX2 regulated genes in Keratinocyte Overexpression from PMID: 30772301 | SOX2 |
| CCNJ      | SOX2 regulated genes in Keratinocyte Overexpression from PMID: 30772301 | SOX2 |
| CNTROB    | SOX2 regulated genes in Keratinocyte Overexpression from PMID: 30772301 | SOX2 |
| UXS1      | SOX2 regulated genes in Keratinocyte Overexpression from PMID: 30772301 | SOX2 |
| MVK       | SOX2 regulated genes in Keratinocyte Overexpression from PMID: 30772301 | SOX2 |
| RASAL2    | SOX2 regulated genes in Keratinocyte Overexpression from PMID: 30772301 | SOX2 |
| STK11     | SOX2 regulated genes in Keratinocyte Overexpression from PMID: 30772301 | SOX2 |

|           |                                                                         |      |
|-----------|-------------------------------------------------------------------------|------|
| RAD17     | SOX2 regulated genes in Keratinocyte Overexpression from PMID: 30772301 | SOX2 |
| NDUFC2    | SOX2 regulated genes in Keratinocyte Overexpression from PMID: 30772301 | SOX2 |
| DUOXA1    | SOX2 regulated genes in Keratinocyte Overexpression from PMID: 30772301 | SOX2 |
| PPP2R2B   | SOX2 regulated genes in Keratinocyte Overexpression from PMID: 30772301 | SOX2 |
| TNFAIP8L1 | SOX2 regulated genes in Keratinocyte Overexpression from PMID: 30772301 | SOX2 |
| HDAC4     | SOX2 regulated genes in Keratinocyte Overexpression from PMID: 30772301 | SOX2 |
| DPP3      | SOX2 regulated genes in Keratinocyte Overexpression from PMID: 30772301 | SOX2 |
| DHRS13    | SOX2 regulated genes in Keratinocyte Overexpression from PMID: 30772301 | SOX2 |
| DYNC2L1   | SOX2 regulated genes in Keratinocyte Overexpression from PMID: 30772301 | SOX2 |
| ZBTB2     | SOX2 regulated genes in Keratinocyte Overexpression from PMID: 30772301 | SOX2 |
| EIF1      | SOX2 regulated genes in Keratinocyte Overexpression from PMID: 30772301 | SOX2 |
| RPF1      | SOX2 regulated genes in Keratinocyte Overexpression from PMID: 30772301 | SOX2 |
| IPO7      | SOX2 regulated genes in Keratinocyte Overexpression from PMID: 30772301 | SOX2 |
| RASSF9    | SOX2 regulated genes in Keratinocyte Overexpression from PMID: 30772301 | SOX2 |
| ZFAND1    | SOX2 regulated genes in Keratinocyte Overexpression from PMID: 30772301 | SOX2 |
| RABIF     | SOX2 regulated genes in Keratinocyte Overexpression from PMID: 30772301 | SOX2 |
| MYT1L     | SOX2 regulated genes in Keratinocyte Overexpression from PMID: 30772301 | SOX2 |
| USP37     | SOX2 regulated genes in Keratinocyte Overexpression from PMID: 30772301 | SOX2 |
| GPN1      | SOX2 regulated genes in Keratinocyte Overexpression from PMID: 30772301 | SOX2 |
| MED19     | SOX2 regulated genes in Keratinocyte Overexpression from PMID: 30772301 | SOX2 |
| ADGRL3    | SOX2 regulated genes in Keratinocyte Overexpression from PMID: 30772301 | SOX2 |
| STK11IP   | SOX2 regulated genes in Keratinocyte Overexpression from PMID: 30772301 | SOX2 |
| PNMA1     | SOX2 regulated genes in Keratinocyte Overexpression from PMID: 30772301 | SOX2 |
| CC2D1B    | SOX2 regulated genes in Keratinocyte Overexpression from PMID: 30772301 | SOX2 |
| FABP4     | SOX2 regulated genes in Keratinocyte Overexpression from PMID: 30772301 | SOX2 |
| ABHD14A   | SOX2 regulated genes in Keratinocyte Overexpression from PMID: 30772301 | SOX2 |
| NR2F6     | SOX2 regulated genes in Keratinocyte Overexpression from PMID: 30772301 | SOX2 |
| ARMT1     | SOX2 regulated genes in Keratinocyte Overexpression from PMID: 30772301 | SOX2 |
| WDR33     | SOX2 regulated genes in Keratinocyte Overexpression from PMID: 30772301 | SOX2 |
| HNRNPA3   | SOX2 regulated genes in Keratinocyte Overexpression from PMID: 30772301 | SOX2 |
| LRIG1     | SOX2 regulated genes in Keratinocyte Overexpression from PMID: 30772301 | SOX2 |
| ETV2      | SOX2 regulated genes in Keratinocyte Overexpression from PMID: 30772301 | SOX2 |
| BNIP1     | SOX2 regulated genes in Keratinocyte Overexpression from PMID: 30772301 | SOX2 |
| INSIG2    | SOX2 regulated genes in Keratinocyte Overexpression from PMID: 30772301 | SOX2 |
| CETN3     | SOX2 regulated genes in Keratinocyte Overexpression from PMID: 30772301 | SOX2 |
| FAM98C    | SOX2 regulated genes in Keratinocyte Overexpression from PMID: 30772301 | SOX2 |
| HAS3      | SOX2 regulated genes in Keratinocyte Overexpression from PMID: 30772301 | SOX2 |
| PAN2      | SOX2 regulated genes in Keratinocyte Overexpression from PMID: 30772301 | SOX2 |
| SPNS2     | SOX2 regulated genes in Keratinocyte Overexpression from PMID: 30772301 | SOX2 |
| TRIM33    | SOX2 regulated genes in Keratinocyte Overexpression from PMID: 30772301 | SOX2 |
| SGMS2     | SOX2 regulated genes in Keratinocyte Overexpression from PMID: 30772301 | SOX2 |
| ZNF771    | SOX2 regulated genes in Keratinocyte Overexpression from PMID: 30772301 | SOX2 |
| CLP1      | SOX2 regulated genes in Keratinocyte Overexpression from PMID: 30772301 | SOX2 |
| DCBLD2    | SOX2 regulated genes in Keratinocyte Overexpression from PMID: 30772301 | SOX2 |
| RRP9      | SOX2 regulated genes in Keratinocyte Overexpression from PMID: 30772301 | SOX2 |
| OTUD3     | SOX2 regulated genes in Keratinocyte Overexpression from PMID: 30772301 | SOX2 |
| LRRC8E    | SOX2 regulated genes in Keratinocyte Overexpression from PMID: 30772301 | SOX2 |
| TONSL     | SOX2 regulated genes in Keratinocyte Overexpression from PMID: 30772301 | SOX2 |
| NRDC      | SOX2 regulated genes in Keratinocyte Overexpression from PMID: 30772301 | SOX2 |
| DCP1A     | SOX2 regulated genes in Keratinocyte Overexpression from PMID: 30772301 | SOX2 |
| ELMO3     | SOX2 regulated genes in Keratinocyte Overexpression from PMID: 30772301 | SOX2 |
| ZNF12     | SOX2 regulated genes in Keratinocyte Overexpression from PMID: 30772301 | SOX2 |
| FAM126B   | SOX2 regulated genes in Keratinocyte Overexpression from PMID: 30772301 | SOX2 |
| EDARADD   | SOX2 regulated genes in Keratinocyte Overexpression from PMID: 30772301 | SOX2 |
| NABP2     | SOX2 regulated genes in Keratinocyte Overexpression from PMID: 30772301 | SOX2 |
| TKT       | SOX2 regulated genes in Keratinocyte Overexpression from PMID: 30772301 | SOX2 |
| MCUR1     | SOX2 regulated genes in Keratinocyte Overexpression from PMID: 30772301 | SOX2 |
| GALNT3    | SOX2 regulated genes in Keratinocyte Overexpression from PMID: 30772301 | SOX2 |
| WIF1      | SOX2 regulated genes in Keratinocyte Overexpression from PMID: 30772301 | SOX2 |







|          |                                                                         |      |
|----------|-------------------------------------------------------------------------|------|
| PANX1    | SOX2 regulated genes in Keratinocyte Overexpression from PMID: 30772301 | SOX2 |
| IPO11    | SOX2 regulated genes in Keratinocyte Overexpression from PMID: 30772301 | SOX2 |
| PLEKHH2  | SOX2 regulated genes in Keratinocyte Overexpression from PMID: 30772301 | SOX2 |
| SMG8     | SOX2 regulated genes in Keratinocyte Overexpression from PMID: 30772301 | SOX2 |
| HMCES    | SOX2 regulated genes in Keratinocyte Overexpression from PMID: 30772301 | SOX2 |
| C1orf56  | SOX2 regulated genes in Keratinocyte Overexpression from PMID: 30772301 | SOX2 |
| CYB561D1 | SOX2 regulated genes in Keratinocyte Overexpression from PMID: 30772301 | SOX2 |
| CBX5     | SOX2 regulated genes in Keratinocyte Overexpression from PMID: 30772301 | SOX2 |
| KLK10    | SOX2 regulated genes in Keratinocyte Overexpression from PMID: 30772301 | SOX2 |
| SS18L2   | SOX2 regulated genes in Keratinocyte Overexpression from PMID: 30772301 | SOX2 |
| RNF40    | SOX2 regulated genes in Keratinocyte Overexpression from PMID: 30772301 | SOX2 |
| CLPP     | SOX2 regulated genes in Keratinocyte Overexpression from PMID: 30772301 | SOX2 |
| ZNF608   | SOX2 regulated genes in Keratinocyte Overexpression from PMID: 30772301 | SOX2 |
| MYO18A   | SOX2 regulated genes in Keratinocyte Overexpression from PMID: 30772301 | SOX2 |
| HOXD1    | SOX2 regulated genes in Keratinocyte Overexpression from PMID: 30772301 | SOX2 |
| SKA2     | SOX2 regulated genes in Keratinocyte Overexpression from PMID: 30772301 | SOX2 |
| ATF7IP2  | SOX2 regulated genes in Keratinocyte Overexpression from PMID: 30772301 | SOX2 |
| AMH      | SOX2 regulated genes in Keratinocyte Overexpression from PMID: 30772301 | SOX2 |
| MVB12A   | SOX2 regulated genes in Keratinocyte Overexpression from PMID: 30772301 | SOX2 |
| METTL16  | SOX2 regulated genes in Keratinocyte Overexpression from PMID: 30772301 | SOX2 |
| BUB1     | SOX2 regulated genes in Keratinocyte Overexpression from PMID: 30772301 | SOX2 |
| HDAC5    | SOX2 regulated genes in Keratinocyte Overexpression from PMID: 30772301 | SOX2 |
| DENND2C  | SOX2 regulated genes in Keratinocyte Overexpression from PMID: 30772301 | SOX2 |
| ATR      | SOX2 regulated genes in Keratinocyte Overexpression from PMID: 30772301 | SOX2 |
| TRAPPC4  | SOX2 regulated genes in Keratinocyte Overexpression from PMID: 30772301 | SOX2 |
| DDX6     | SOX2 regulated genes in Keratinocyte Overexpression from PMID: 30772301 | SOX2 |
| PSD3     | SOX2 regulated genes in Keratinocyte Overexpression from PMID: 30772301 | SOX2 |
| PLBD1    | SOX2 regulated genes in Keratinocyte Overexpression from PMID: 30772301 | SOX2 |
| CCDC97   | SOX2 regulated genes in Keratinocyte Overexpression from PMID: 30772301 | SOX2 |
| KIAA0825 | SOX2 regulated genes in Keratinocyte Overexpression from PMID: 30772301 | SOX2 |
| TSEN2    | SOX2 regulated genes in Keratinocyte Overexpression from PMID: 30772301 | SOX2 |
| KLF1     | SOX2 regulated genes in Keratinocyte Overexpression from PMID: 30772301 | SOX2 |
| COL11A2  | SOX2 regulated genes in Keratinocyte Overexpression from PMID: 30772301 | SOX2 |
| TDRD1    | SOX2 regulated genes in Keratinocyte Overexpression from PMID: 30772301 | SOX2 |
| IGSF9    | SOX2 regulated genes in Keratinocyte Overexpression from PMID: 30772301 | SOX2 |
| EPS8L2   | SOX2 regulated genes in Keratinocyte Overexpression from PMID: 30772301 | SOX2 |
| TERF1    | SOX2 regulated genes in Keratinocyte Overexpression from PMID: 30772301 | SOX2 |
| MXD3     | SOX2 regulated genes in Keratinocyte Overexpression from PMID: 30772301 | SOX2 |
| GABPB1   | SOX2 regulated genes in Keratinocyte Overexpression from PMID: 30772301 | SOX2 |
| WWP2     | SOX2 regulated genes in Keratinocyte Overexpression from PMID: 30772301 | SOX2 |
| CCAR2    | SOX2 regulated genes in Keratinocyte Overexpression from PMID: 30772301 | SOX2 |
| SH3TC2   | SOX2 regulated genes in Keratinocyte Overexpression from PMID: 30772301 | SOX2 |
| PRR22    | SOX2 regulated genes in Keratinocyte Overexpression from PMID: 30772301 | SOX2 |
| C1orf52  | SOX2 regulated genes in Keratinocyte Overexpression from PMID: 30772301 | SOX2 |
| SH3GL1   | SOX2 regulated genes in Keratinocyte Overexpression from PMID: 30772301 | SOX2 |
| DALRD3   | SOX2 regulated genes in Keratinocyte Overexpression from PMID: 30772301 | SOX2 |
| NDUFAF3  | SOX2 regulated genes in Keratinocyte Overexpression from PMID: 30772301 | SOX2 |
| NOSIP    | SOX2 regulated genes in Keratinocyte Overexpression from PMID: 30772301 | SOX2 |
| CREB3L4  | SOX2 regulated genes in Keratinocyte Overexpression from PMID: 30772301 | SOX2 |
| TRPV1    | SOX2 regulated genes in Keratinocyte Overexpression from PMID: 30772301 | SOX2 |
| HYOU1    | SOX2 regulated genes in Keratinocyte Overexpression from PMID: 30772301 | SOX2 |
| PSPN     | SOX2 regulated genes in Keratinocyte Overexpression from PMID: 30772301 | SOX2 |
| SLC35E2B | SOX2 regulated genes in Keratinocyte Overexpression from PMID: 30772301 | SOX2 |
| TMEM198  | SOX2 regulated genes in Keratinocyte Overexpression from PMID: 30772301 | SOX2 |
| RPL35A   | SOX2 regulated genes in Keratinocyte Overexpression from PMID: 30772301 | SOX2 |
| LSM6     | SOX2 regulated genes in Keratinocyte Overexpression from PMID: 30772301 | SOX2 |
| TYW5     | SOX2 regulated genes in Keratinocyte Overexpression from PMID: 30772301 | SOX2 |
| NFRKB    | SOX2 regulated genes in Keratinocyte Overexpression from PMID: 30772301 | SOX2 |
| ZC3H10   | SOX2 regulated genes in Keratinocyte Overexpression from PMID: 30772301 | SOX2 |

|          |                                                                         |      |
|----------|-------------------------------------------------------------------------|------|
| RCC1L    | SOX2 regulated genes in Keratinocyte Overexpression from PMID: 30772301 | SOX2 |
| AHCTF1   | SOX2 regulated genes in Keratinocyte Overexpression from PMID: 30772301 | SOX2 |
| ENGASE   | SOX2 regulated genes in Keratinocyte Overexpression from PMID: 30772301 | SOX2 |
| PSMD4    | SOX2 regulated genes in Keratinocyte Overexpression from PMID: 30772301 | SOX2 |
| SMG7     | SOX2 regulated genes in Keratinocyte Overexpression from PMID: 30772301 | SOX2 |
| CDK10    | SOX2 regulated genes in Keratinocyte Overexpression from PMID: 30772301 | SOX2 |
| KLHL21   | SOX2 regulated genes in Keratinocyte Overexpression from PMID: 30772301 | SOX2 |
| EVI5L    | SOX2 regulated genes in Keratinocyte Overexpression from PMID: 30772301 | SOX2 |
| INTS11   | SOX2 regulated genes in Keratinocyte Overexpression from PMID: 30772301 | SOX2 |
| SUPT6H   | SOX2 regulated genes in Keratinocyte Overexpression from PMID: 30772301 | SOX2 |
| FZD7     | SOX2 regulated genes in Keratinocyte Overexpression from PMID: 30772301 | SOX2 |
| SPAST    | SOX2 regulated genes in Keratinocyte Overexpression from PMID: 30772301 | SOX2 |
| APOLD1   | SOX2 regulated genes in Keratinocyte Overexpression from PMID: 30772301 | SOX2 |
| RAPGEFL1 | SOX2 regulated genes in Keratinocyte Overexpression from PMID: 30772301 | SOX2 |
| RNFT2    | SOX2 regulated genes in Keratinocyte Overexpression from PMID: 30772301 | SOX2 |
| ADGRL1   | SOX2 regulated genes in Keratinocyte Overexpression from PMID: 30772301 | SOX2 |
| MOB4     | SOX2 regulated genes in Keratinocyte Overexpression from PMID: 30772301 | SOX2 |
| S100A6   | SOX2 regulated genes in Keratinocyte Overexpression from PMID: 30772301 | SOX2 |
| SCYL3    | SOX2 regulated genes in Keratinocyte Overexpression from PMID: 30772301 | SOX2 |
| RAPGEF2  | SOX2 regulated genes in Keratinocyte Overexpression from PMID: 30772301 | SOX2 |
| STAMBP   | SOX2 regulated genes in Keratinocyte Overexpression from PMID: 30772301 | SOX2 |
| LSR      | SOX2 regulated genes in Keratinocyte Overexpression from PMID: 30772301 | SOX2 |
| FBLN7    | SOX2 regulated genes in Keratinocyte Overexpression from PMID: 30772301 | SOX2 |
| ATIC     | SOX2 regulated genes in Keratinocyte Overexpression from PMID: 30772301 | SOX2 |
| CARF     | SOX2 regulated genes in Keratinocyte Overexpression from PMID: 30772301 | SOX2 |
| NHSL1    | SOX2 regulated genes in Keratinocyte Overexpression from PMID: 30772301 | SOX2 |
| CSRNP2   | SOX2 regulated genes in Keratinocyte Overexpression from PMID: 30772301 | SOX2 |
| CCND1    | SOX2 regulated genes in Keratinocyte Overexpression from PMID: 30772301 | SOX2 |
| UBE2G1   | SOX2 regulated genes in Keratinocyte Overexpression from PMID: 30772301 | SOX2 |
| CDKN2D   | SOX2 regulated genes in Keratinocyte Overexpression from PMID: 30772301 | SOX2 |
| WDR46    | SOX2 regulated genes in Keratinocyte Overexpression from PMID: 30772301 | SOX2 |
| SETD1B   | SOX2 regulated genes in Keratinocyte Overexpression from PMID: 30772301 | SOX2 |
| PUM1     | SOX2 regulated genes in Keratinocyte Overexpression from PMID: 30772301 | SOX2 |
| NDUFV1   | SOX2 regulated genes in Keratinocyte Overexpression from PMID: 30772301 | SOX2 |
| RABGGTB  | SOX2 regulated genes in Keratinocyte Overexpression from PMID: 30772301 | SOX2 |
| SLC35A1  | SOX2 regulated genes in Keratinocyte Overexpression from PMID: 30772301 | SOX2 |
| CSPP1    | SOX2 regulated genes in Keratinocyte Overexpression from PMID: 30772301 | SOX2 |
| COMMD1   | SOX2 regulated genes in Keratinocyte Overexpression from PMID: 30772301 | SOX2 |
| LYPD3    | SOX2 regulated genes in Keratinocyte Overexpression from PMID: 30772301 | SOX2 |
| ST3GAL5  | SOX2 regulated genes in Keratinocyte Overexpression from PMID: 30772301 | SOX2 |
| VPS54    | SOX2 regulated genes in Keratinocyte Overexpression from PMID: 30772301 | SOX2 |
| CTTNBP2  | SOX2 regulated genes in Keratinocyte Overexpression from PMID: 30772301 | SOX2 |
| MAP2K7   | SOX2 regulated genes in Keratinocyte Overexpression from PMID: 30772301 | SOX2 |
| MYO19    | SOX2 regulated genes in Keratinocyte Overexpression from PMID: 30772301 | SOX2 |
| FMO4     | SOX2 regulated genes in Keratinocyte Overexpression from PMID: 30772301 | SOX2 |
| VEPH1    | SOX2 regulated genes in Keratinocyte Overexpression from PMID: 30772301 | SOX2 |
| PPL      | SOX2 regulated genes in Keratinocyte Overexpression from PMID: 30772301 | SOX2 |
| EFHD1    | SOX2 regulated genes in Keratinocyte Overexpression from PMID: 30772301 | SOX2 |
| DYNC2H1  | SOX2 regulated genes in Keratinocyte Overexpression from PMID: 30772301 | SOX2 |
| SNRNP70  | SOX2 regulated genes in Keratinocyte Overexpression from PMID: 30772301 | SOX2 |
| KDF1     | SOX2 regulated genes in Keratinocyte Overexpression from PMID: 30772301 | SOX2 |
| GLIS1    | SOX2 regulated genes in Keratinocyte Overexpression from PMID: 30772301 | SOX2 |
| ERC2     | SOX2 regulated genes in Keratinocyte Overexpression from PMID: 30772301 | SOX2 |
| LRRC40   | SOX2 regulated genes in Keratinocyte Overexpression from PMID: 30772301 | SOX2 |
| TFDP2    | SOX2 regulated genes in Keratinocyte Overexpression from PMID: 30772301 | SOX2 |
| NCDN     | SOX2 regulated genes in Keratinocyte Overexpression from PMID: 30772301 | SOX2 |
| SLC35A4  | SOX2 regulated genes in Keratinocyte Overexpression from PMID: 30772301 | SOX2 |
| MRPL35   | SOX2 regulated genes in Keratinocyte Overexpression from PMID: 30772301 | SOX2 |
| HR       | KLF5 regulated genes from PMID 34217701                                 | KLF5 |

|             |                                         |      |
|-------------|-----------------------------------------|------|
| ITGB4       | KLF5 regulated genes from PMID 34217701 | KLF5 |
| GLI2        | KLF5 regulated genes from PMID 34217701 | KLF5 |
| HERPUD2     | KLF5 regulated genes from PMID 34217701 | KLF5 |
| PTPRU       | KLF5 regulated genes from PMID 34217701 | KLF5 |
| DPYSL2      | KLF5 regulated genes from PMID 34217701 | KLF5 |
| XYLT1       | KLF5 regulated genes from PMID 34217701 | KLF5 |
| TRAK1       | KLF5 regulated genes from PMID 34217701 | KLF5 |
| DTX4        | KLF5 regulated genes from PMID 34217701 | KLF5 |
| SEC62       | KLF5 regulated genes from PMID 34217701 | KLF5 |
| NEDD9       | KLF5 regulated genes from PMID 34217701 | KLF5 |
| PCDH1       | KLF5 regulated genes from PMID 34217701 | KLF5 |
| ZNF385A     | KLF5 regulated genes from PMID 34217701 | KLF5 |
| CD55        | KLF5 regulated genes from PMID 34217701 | KLF5 |
| RUNX1       | KLF5 regulated genes from PMID 34217701 | KLF5 |
| TMPRSS5     | KLF5 regulated genes from PMID 34217701 | KLF5 |
| LAMA3       | KLF5 regulated genes from PMID 34217701 | KLF5 |
| MICALL1     | KLF5 regulated genes from PMID 34217701 | KLF5 |
| PHACTR3     | KLF5 regulated genes from PMID 34217701 | KLF5 |
| EMP1        | KLF5 regulated genes from PMID 34217701 | KLF5 |
| MYH14       | KLF5 regulated genes from PMID 34217701 | KLF5 |
| PI3         | KLF5 regulated genes from PMID 34217701 | KLF5 |
| STEAP4      | KLF5 regulated genes from PMID 34217701 | KLF5 |
| EPHB3       | KLF5 regulated genes from PMID 34217701 | KLF5 |
| FAM129A     | KLF5 regulated genes from PMID 34217701 | KLF5 |
| TRIM2       | KLF5 regulated genes from PMID 34217701 | KLF5 |
| PKP1        | KLF5 regulated genes from PMID 34217701 | KLF5 |
| AHCYL2      | KLF5 regulated genes from PMID 34217701 | KLF5 |
| ^MARCH3     | KLF5 regulated genes from PMID 34217701 | KLF5 |
| TRPV4       | KLF5 regulated genes from PMID 34217701 | KLF5 |
| RAPGEFL1    | KLF5 regulated genes from PMID 34217701 | KLF5 |
| WNT7A       | KLF5 regulated genes from PMID 34217701 | KLF5 |
| DZIP1       | KLF5 regulated genes from PMID 34217701 | KLF5 |
| SEMA3B      | KLF5 regulated genes from PMID 34217701 | KLF5 |
| PLAC9       | KLF5 regulated genes from PMID 34217701 | KLF5 |
| ROS1        | KLF5 regulated genes from PMID 34217701 | KLF5 |
| CACNG4      | KLF5 regulated genes from PMID 34217701 | KLF5 |
| ALPP        | KLF5 regulated genes from PMID 34217701 | KLF5 |
| AIM1L       | KLF5 regulated genes from PMID 34217701 | KLF5 |
| AHNAK2      | KLF5 regulated genes from PMID 34217701 | KLF5 |
| GPRC5A      | KLF5 regulated genes from PMID 34217701 | KLF5 |
| ALS2CL      | KLF5 regulated genes from PMID 34217701 | KLF5 |
| ZNF860      | KLF5 regulated genes from PMID 34217701 | KLF5 |
| ARHGEF37    | KLF5 regulated genes from PMID 34217701 | KLF5 |
| IGFBP2      | KLF5 regulated genes from PMID 34217701 | KLF5 |
| PMAIP1      | KLF5 regulated genes from PMID 34217701 | KLF5 |
| MYEOV       | KLF5 regulated genes from PMID 34217701 | KLF5 |
| MUC1        | KLF5 regulated genes from PMID 34217701 | KLF5 |
| MISP        | KLF5 regulated genes from PMID 34217701 | KLF5 |
| TSPAN2      | KLF5 regulated genes from PMID 34217701 | KLF5 |
| SERTAD4-AS1 | KLF5 regulated genes from PMID 34217701 | KLF5 |
| ADD3        | KLF5 regulated genes from PMID 34217701 | KLF5 |
| CMKLR1      | KLF5 regulated genes from PMID 34217701 | KLF5 |
| PIK3C2B     | KLF5 regulated genes from PMID 34217701 | KLF5 |
| VILL        | KLF5 regulated genes from PMID 34217701 | KLF5 |
| ID1         | KLF5 regulated genes from PMID 34217701 | KLF5 |
| C10orf54    | KLF5 regulated genes from PMID 34217701 | KLF5 |
| PHLDA3      | KLF5 regulated genes from PMID 34217701 | KLF5 |
| SRMS        | KLF5 regulated genes from PMID 34217701 | KLF5 |
| KRT6A       | KLF5 regulated genes from PMID 34217701 | KLF5 |



MECOM  
TLR5  
FAM83A  
ANO1

KLF5 regulated genes from PMID 34217701  
KLF5 regulated genes from PMID 34217701  
KLF5 regulated genes from PMID 34217701  
KLF5 regulated genes from PMID 34217701

KLF5  
KLF5  
KLF5  
KLF5

**Supplemental Table 6.** Module 7 genes known to be regulated by SOX2 and/or KLF5.

| <b>gene</b> | <b>source</b>                                                                       | <b>regulator</b> |
|-------------|-------------------------------------------------------------------------------------|------------------|
| ANO1        | KLF5 regulated genes from PMID 34217701                                             | KLF5             |
| APOL1       | SOX2 regulated genes in Wounding from PMID: 30772301                                | SOX2             |
| APOL1       | Enrichr CHEA_2022: SOX2 20726797 ChIP-Seq SW620 Human                               | SOX2             |
| APOL1       | SOX2 regulated genes in Keratinocyte Overexpression from PMID: 30772301             | SOX2             |
| ATP8B1      | SOX2-KLF5 coregulated genes from PMID: 33972779                                     | SOX2 + KLF5      |
| BCL2L15     | SOX2-KLF5 coregulated genes from PMID: 33972779                                     | SOX2 + KLF5      |
| CA2         | Enrichr CHEA_2022: SOX2 20726797 ChIP-Seq SW620 Human                               | SOX2             |
| CA2         | SOX2 regulated genes in Wounding from PMID: 30772301                                | SOX2             |
| CAMK1D      | Enrichr TF Perturbations followed by expression: KLF5 20726797 ChIP-Seq SW620 Human | KLF5             |
| CDH3        | SOX2 regulated genes in Wounding from PMID: 30772301                                | SOX2             |
| CLDN1       | SOX2-KLF5 coregulated genes from PMID: 33972779                                     | SOX2 + KLF5      |
| CLDN1       | SOX2 regulated genes in Keratinocyte Overexpression from PMID: 30772301             | SOX2             |
| CLDN1       | SOX2 regulated genes in Wounding from PMID: 30772301                                | SOX2             |
| CLDN1       | Enrichr CHEA_2022: SOX2 20726797 ChIP-Seq SW620 Human                               | SOX2             |
| CYP2S1      | SOX2 regulated genes in Wounding from PMID: 30772301                                | SOX2             |
| DPYD        | Enrichr CHEA_2022: SOX2 20726797 ChIP-Seq SW620 Human                               | SOX2             |
| DSG3        | SOX2-KLF5 coregulated genes from PMID: 33972779                                     | SOX2 + KLF5      |
| DSG3        | Enrichr TF Perturbations followed by expression: KLF5 20726797 ChIP-Seq SW620 Human | KLF5             |
| DSG3        | SOX2 regulated genes in Wounding from PMID: 30772301                                | SOX2             |
| DSG3        | SOX2 regulated genes in Keratinocyte Overexpression from PMID: 30772301             | SOX2             |
| DSP         | SOX2 regulated genes in Keratinocyte Overexpression from PMID: 30772301             | SOX2             |
| DSP         | SOX2-KLF5 coregulated genes from PMID: 33972779                                     | SOX2 + KLF5      |
| DSP         | Enrichr CHEA_2022: SOX2 20726797 ChIP-Seq SW620 Human                               | SOX2             |
| DSP         | SOX2 regulated genes in Wounding from PMID: 30772301                                | SOX2             |
| DUOX1       | SOX2 regulated genes in Wounding from PMID: 30772301                                | SOX2             |
| EPPK1       | Enrichr CHEA_2022: SOX2 20726797 ChIP-Seq SW620 Human                               | SOX2             |
| EPPK1       | SOX2 regulated genes in Wounding from PMID: 30772301                                | SOX2             |
| GALNT5      | Enrichr TF Perturbations followed by expression: KLF5 20726797 ChIP-Seq SW620 Human | KLF5             |
| GALNT5      | Enrichr CHEA_2022: SOX2 20726797 ChIP-Seq SW620 Human                               | SOX2             |
| HAS3        | SOX2 regulated genes in Wounding from PMID: 30772301                                | SOX2             |
| HAS3        | Enrichr CHEA_2022: SOX2 20726797 ChIP-Seq SW620 Human                               | SOX2             |
| HAS3        | SOX2 regulated genes in Keratinocyte Overexpression from PMID: 30772301             | SOX2             |
| HPGD        | Enrichr CHEA_2022: SOX2 20726797 ChIP-Seq SW620 Human                               | SOX2             |
| HPGD        | SOX2 regulated genes from PMID: 20726797                                            | SOX2             |
| KCNJ2       | SOX2-KLF5 coregulated genes from PMID: 33972779                                     | SOX2 + KLF5      |
| MPP7        | SOX2 regulated genes in Wounding from PMID: 30772301                                | SOX2             |
| MX1         | Enrichr CHEA_2022: SOX2 20726797 ChIP-Seq SW620 Human                               | SOX2             |
| MYH9        | SOX2-KLF5 coregulated genes from PMID: 33972779                                     | SOX2 + KLF5      |
| MYH9        | SOX2 regulated genes in Keratinocyte Overexpression from PMID: 30772301             | SOX2             |
| MYH9        | SOX2 regulated genes in Wounding from PMID: 30772301                                | SOX2             |
| NEFL        | Enrichr TF Perturbations followed by expression: KLF5 20726797 ChIP-Seq SW620 Human | KLF5             |
| PDZK1IP1    | Enrichr CHEA_2022: SOX2 20726797 ChIP-Seq SW620 Human                               | SOX2             |
| PHLDB2      | SOX2 regulated genes in Wounding from PMID: 30772301                                | SOX2             |
| PHLDB2      | Enrichr CHEA_2022: SOX2 20726797 ChIP-Seq SW620 Human                               | SOX2             |
| PHLDB2      | SOX2 regulated genes in Keratinocyte Overexpression from PMID: 30772301             | SOX2             |
| SERPINB3    | Enrichr CHEA_2022: SOX2 20726797 ChIP-Seq SW620 Human                               | SOX2             |
| SFRP1       | SOX2 regulated genes in Keratinocyte Overexpression from PMID: 30772301             | SOX2             |
| SFRP1       | SOX2 regulated genes in Wounding from PMID: 30772301                                | SOX2             |
| SGK1        | SOX2 regulated genes in Wounding from PMID: 30772301                                | SOX2             |
| SGK1        | SOX2-KLF5 coregulated genes from PMID: 33972779                                     | SOX2 + KLF5      |
| SH3RF2      | Enrichr TF Perturbations followed by expression: KLF5 20726797 ChIP-Seq SW620 Human | KLF5             |
| SH3RF2      | SOX2 regulated genes in Keratinocyte Overexpression from PMID: 30772301             | SOX2             |
| TFPI        | Enrichr CHEA_2022: SOX2 20726797 ChIP-Seq SW620 Human                               | SOX2             |
| TNFAIP6     | SOX2 regulated genes in Wounding from PMID: 30772301                                | SOX2             |















|          |             |             |             |             |             |             |                   |
|----------|-------------|-------------|-------------|-------------|-------------|-------------|-------------------|
| USP14    | 1.129592738 | 0.001526458 | 0.009387421 | 41.12020623 | 13.37419131 | Superficial | SOX2              |
| LONRF1   | 1.128697791 | 0.003462059 | 0.014108599 | 16.98832356 | 3.932101419 | Superficial | SOX2              |
| PTPN11   | 1.127491694 | 0.000250281 | 0.007176147 | 45.38995352 | 15.60369219 | Superficial | SOX2              |
| SLC44A1  | 1.124630481 | 0.010644787 | 0.029507311 | 30.70360064 | 9.008386975 | Superficial | SOX2              |
| PAPSS1   | 1.123121593 | 0.002315114 | 0.011381143 | 42.22052091 | 14.95779843 | Superficial | SOX2              |
| AMMECR1  | 1.123103887 | 0.000506425 | 0.007178523 | 40.51025441 | 13.19490157 | Superficial | SOX2              |
| ATG4D    | 1.120578518 | 0.001883197 | 0.010234018 | 42.99015922 | 16.54741472 | Superficial | SOX2              |
| FOXQ1    | 1.120308157 | 0.000795824 | 0.010838271 | 49.85377761 | 21.73787519 | Suprabasal  | SOX2 + KLF5, SOX2 |
| DROSHA   | 1.120211159 | 0.002315114 | 0.011381143 | 12.39509232 | 3.912492171 | Superficial | SOX2              |
| DGCR2    | 1.119753322 | 0.000992312 | 0.008042817 | 36.05458181 | 11.88605041 | Superficial | SOX2              |
| NAT1     | 1.11949899  | 0.005105016 | 0.018023407 | 9.560135729 | 2.733991516 | Superficial | SOX2              |
| SNX7     | 1.118765388 | 0.000506425 | 0.007178523 | 24.582421   | 8.291960086 | Superficial | SOX2              |
| BCL2L2   | 1.118547819 | 0.002315114 | 0.011381143 | 33.03297089 | 10.55302431 | Superficial | SOX2              |
| OXNAD1   | 1.115216096 | 0.001232925 | 0.008679903 | 12.00572046 | 3.740562131 | Superficial | SOX2              |
| KANK1    | 1.115157148 | 0.003462059 | 0.014108599 | 45.85522332 | 16.13807382 | Superficial | SOX2              |
| FBXL18   | 1.11490085  | 0.008904627 | 0.025990329 | 18.8479122  | 5.558665317 | Superficial | SOX2              |
| TRIM4    | 1.114744712 | 0.000119764 | 0.007176147 | 21.61232033 | 6.44415365  | Superficial | SOX2              |
| DCTD     | 1.114599725 | 0.000992312 | 0.008042817 | 41.37982677 | 14.56407296 | Superficial | SOX2              |
| TMEM87A  | 1.112172671 | 9.30E-05    | 0.007176147 | 62.99294426 | 28.05497565 | Superficial | SOX2              |
| ACVR1    | 1.11208563  | 0.010644787 | 0.029507311 | 7.565015766 | 1.571333265 | Superficial | SOX2, SOX2 + KLF5 |
| PRPF8    | 1.110632241 | 0.001232925 | 0.008679903 | 43.91749476 | 15.59100667 | Superficial | SOX2              |
| SLC5A3   | 1.108546111 | 0.017811616 | 0.043066688 | 15.68467168 | 4.283838368 | Superficial | SOX2 + KLF5       |
| KNOP1    | 1.107463007 | 0.000635975 | 0.007274975 | 26.61624999 | 8.346682897 | Superficial | SOX2              |
| RASEF    | 1.106436035 | 0.002836074 | 0.012662188 | 33.89849056 | 10.29433174 | Superficial | SOX2              |
| ITPR1P   | 1.103478092 | 0.000119764 | 0.012455402 | 20.07023032 | 8.016875374 | Basal       | SOX2              |
| AGAP1    | 1.103049375 | 0.004211401 | 0.016013117 | 10.92596213 | 3.220511929 | Superficial | SOX2              |
| LYPD3    | 1.10226506  | 0.001526458 | 0.009387421 | 86.62604201 | 62.41967361 | Superficial | SOX2              |
| CEBPB    | 1.100953174 | 0.001883197 | 0.010234018 | 59.35662314 | 25.73980246 | Superficial | SOX2              |
| EPHB6    | 1.098421093 | 0.002315114 | 0.011381143 | 23.20066096 | 6.510947152 | Superficial | SOX2, SOX2 + KLF5 |
| SMAD5    | 1.096440138 | 0.006166656 | 0.020290909 | 35.81411772 | 11.0476338  | Superficial | SOX2              |
| GBP6     | 1.096333706 | 0.000506425 | 0.007178523 | 71.41018052 | 33.62966856 | Superficial | SOX2              |
| ASCC3    | 1.096048273 | 0.000795824 | 0.007615337 | 35.83077768 | 11.24188818 | Superficial | SOX2              |
| FAT2     | 1.095564156 | 0.007423146 | 0.022959455 | 32.04126368 | 11.20764163 | Superficial | SOX2              |
| ECT2     | 1.095234017 | 0.004211401 | 0.021879278 | 15.76508345 | 5.983007448 | Suprabasal  | SOX2              |
| ZBTB7C   | 1.095229116 | 0.006166656 | 0.020290909 | 37.09729954 | 12.38960308 | Superficial | SOX2              |
| ELK3     | 1.093367327 | 0.001883197 | 0.018415354 | 28.56296451 | 10.92497033 | Basal       | SOX2              |
| CRYZ     | 1.092201992 | 0.001883197 | 0.010234018 | 21.73380901 | 5.586580444 | Superficial | SOX2 + KLF5       |
| PITPNC1  | 1.091116348 | 0.004211401 | 0.021879278 | 21.70312809 | 8.978402459 | Suprabasal  | SOX2              |
| MYO1E    | 1.090802208 | 0.004211401 | 0.027185186 | 27.99278453 | 10.70128805 | Basal       | SOX2              |
| LACTB2   | 1.090260768 | 0.001883197 | 0.010234018 | 20.41603957 | 5.557427606 | Superficial | SOX2              |
| ANXA8    | 1.088520498 | 0.006166656 | 0.020290909 | 37.31820819 | 12.19482701 | Superficial | SOX2              |
| PDIA3    | 1.087627963 | 0.000992312 | 0.008042817 | 71.74290452 | 35.69881232 | Superficial | SOX2              |
| EPAS1    | 1.087157497 | 0.007423146 | 0.030449933 | 48.81513341 | 24.82490815 | Suprabasal  | SOX2              |
| EPHB4    | 1.086430382 | 0.002836074 | 0.012662188 | 8.61356527  | 3.03940643  | Superficial | SOX2              |
| FAM83A   | 1.084655702 | 0.000992312 | 0.014320968 | 24.79974942 | 11.00318279 | Basal       | SOX2, KLF5        |
| PAQR5    | 1.084374053 | 0.000401828 | 0.012455402 | 11.68677813 | 4.523001064 | Basal       | SOX2              |
| ACTR1B   | 1.083564297 | 0.002836074 | 0.012662188 | 31.0276409  | 10.4311608  | Superficial | SOX2              |
| ID1      | 1.083067962 | 0.008904627 | 0.025990329 | 67.99885112 | 36.38589517 | Superficial | SOX2, KLF5        |
| ITPR2    | 1.082561726 | 0.002315114 | 0.011381143 | 36.76971811 | 11.19914389 | Superficial | SOX2, KLF5        |
| TGFBR1   | 1.082552543 | 0.017811616 | 0.043066688 | 21.28035822 | 5.768770277 | Superficial | SOX2 + KLF5       |
| ELOVL5   | 1.081800374 | 0.004211401 | 0.021879278 | 35.05474557 | 15.29151468 | Suprabasal  | SOX2              |
| HNRNPLL  | 1.081470571 | 0.000119764 | 0.007176147 | 19.51931021 | 5.953028379 | Superficial | SOX2              |
| CKMT1A   | 1.080797256 | 0.003462059 | 0.014108599 | 45.82714419 | 16.93959481 | Superficial | KLF5              |
| RTKN2    | 1.07996988  | 0.000401828 | 0.012455402 | 26.91170963 | 12.18065285 | Basal       | SOX2              |
| IRF6     | 1.076699665 | 0.000635975 | 0.007274975 | 66.79817342 | 31.74169161 | Superficial | SOX2              |
| GJB6     | 1.074050502 | 0.010644787 | 0.029507311 | 72.67287901 | 34.07712441 | Superficial | SOX2              |
| ZNF276   | 1.073832933 | 0.004211401 | 0.016013117 | 21.6021014  | 8.143746    | Superficial | SOX2              |
| GJB3     | 1.073481421 | 0.001883197 | 0.010234018 | 52.3986983  | 20.43895374 | Superficial | SOX2              |
| ZDHHC24  | 1.073405826 | 0.005105016 | 0.018023407 | 31.33471846 | 10.87359273 | Superficial | SOX2              |
| TXLNA    | 1.072929136 | 0.007423146 | 0.022959455 | 26.7723363  | 9.668176579 | Superficial | SOX2              |
| GNPDA2   | 1.072787336 | 0.003462059 | 0.014108599 | 8.553457117 | 2.209436035 | Superficial | SOX2              |
| ATP7A    | 1.07034877  | 0.001526458 | 0.009387421 | 18.37821598 | 5.769978836 | Superficial | SOX2              |
| CDKN2B   | 1.070294963 | 0.012681065 | 0.049425568 | 18.07850545 | 8.341417478 | Basal       | SOX2              |
| PCNX1    | 1.068627785 | 0.000795824 | 0.007615337 | 13.87619405 | 3.845484788 | Superficial | SOX2              |
| CCDC60   | 1.068090748 | 0.004173922 | 0.016013117 | 5.07941827  | 1.732237896 | Superficial | SOX2              |
| EML4     | 1.066487042 | 0.001232925 | 0.008679903 | 29.48556773 | 8.712000848 | Superficial | SOX2              |
| ZNF219   | 1.066374966 | 0.002836074 | 0.012662188 | 38.58342754 | 13.5543592  | Superficial | SOX2              |
| RIF1     | 1.06443131  | 0.004211401 | 0.016013117 | 24.59154314 | 6.647944401 | Superficial | SOX2              |
| CDC42EP4 | 1.064259537 | 0.000506425 | 0.010489143 | 28.86197028 | 11.84880536 | Suprabasal  | SOX2              |
| HR       | 1.060194125 | 0.000635975 | 0.007274975 | 22.82513006 | 8.75455057  | Superficial | SOX2, KLF5        |
| WWP1     | 1.05999757  | 7.20E-05    | 0.007176147 | 45.17265309 | 16.34281943 | Superficial | SOX2              |
| BOLA2    | 1.059889855 | 0.012659085 | 0.033478436 | 27.52597963 | 8.841058943 | Superficial | SOX2              |
| HES2     | 1.059617182 | 0.000196466 | 0.012455402 | 47.53905383 | 23.28976828 | Basal       | SOX2              |
| CDC42BPG | 1.058014931 | 0.006166656 | 0.020290909 | 29.73744229 | 10.84726719 | Superficial | SOX2              |
| SQLE     | 1.057507387 | 0.010644787 | 0.029507311 | 53.21453026 | 22.40711233 | Superficial | SOX2              |
| PIGO     | 1.055646727 | 0.004211401 | 0.016013117 | 11.60956119 | 3.701016275 | Superficial | SOX2              |
| TADA3    | 1.055607235 | 0.000317696 | 0.007176147 | 40.42552055 | 15.3811476  | Superficial | SOX2              |
| PIK3C2B  | 1.054550473 | 0.001526458 | 0.009387421 | 23.97874975 | 8.155468379 | Superficial | KLF5              |
| ZNF1X1   | 1.05419277  | 0.000992312 | 0.014320968 | 16.99829037 | 5.815432506 | Basal       | SOX2              |
| SMG6     | 1.052156641 | 0.000506425 | 0.007178523 | 28.41227063 | 10.15996499 | Superficial | SOX2              |

|           |             |             |             |             |             |             |                   |
|-----------|-------------|-------------|-------------|-------------|-------------|-------------|-------------------|
| RAB11FIP2 | 1.051539922 | 0.004211401 | 0.016013117 | 12.72551013 | 2.863554896 | Superficial | SOX2 + KLF5, SOX2 |
| GALNT12   | 1.049379383 | 0.001232925 | 0.008679903 | 34.35833398 | 11.63233406 | Superficial | SOX2              |
| PD1K1L    | 1.048431055 | 0.006166656 | 0.020290909 | 11.5882273  | 3.088217267 | Superficial | SOX2              |
| FOXC1     | 1.047638776 | 0.017811616 | 0.043066688 | 15.52853274 | 7.61471716  | Superficial | SOX2              |
| COG6      | 1.04676455  | 0.001526458 | 0.009387421 | 18.12524566 | 6.012127181 | Superficial | SOX2              |
| CLDN4     | 1.046614095 | 0.003462059 | 0.024854712 | 53.00129205 | 29.07079485 | Basal       | SOX2, SOX2 + KLF5 |
| TBC1D5    | 1.045495453 | 0.000506425 | 0.007178523 | 21.15279137 | 6.383257151 | Superficial | SOX2              |
| GBP2      | 1.043537437 | 0.006166656 | 0.020290909 | 43.075913   | 16.48742557 | Superficial | SOX2, SOX2 + KLF5 |
| CHCHD4    | 1.041517737 | 0.005105016 | 0.018023407 | 13.20831071 | 4.101917452 | Superficial | SOX2              |
| PIAS3     | 1.039484217 | 0.005105016 | 0.018023407 | 21.87521411 | 7.021571866 | Superficial | SOX2              |
| PDZRN3    | 1.038845423 | 0.005105016 | 0.018023407 | 9.730521189 | 3.580156724 | Superficial | SOX2 + KLF5, SOX2 |
| EPB41L5   | 1.038189591 | 0.001883197 | 0.010234018 | 32.11329554 | 10.05839763 | Superficial | SOX2              |
| TNKS      | 1.036998801 | 0.001883197 | 0.010234018 | 19.29376441 | 5.687144619 | Superficial | SOX2              |
| GJB5      | 1.036529192 | 0.012681065 | 0.033478436 | 50.72292565 | 17.65083088 | Superficial | SOX2 + KLF5       |
| MANF      | 1.032784742 | 0.003462059 | 0.014108599 | 68.1159678  | 32.72827979 | Superficial | SOX2              |
| HMGXB3    | 1.031603042 | 0.005105016 | 0.018023407 | 13.16907487 | 4.247519548 | Superficial | SOX2              |
| DLG1      | 1.030612623 | 0.000250281 | 0.007176147 | 59.02506663 | 26.05889543 | Superficial | SOX2              |
| ATAD2B    | 1.029425719 | 0.001526458 | 0.009387421 | 21.42384634 | 5.846551603 | Superficial | SOX2              |
| USP12     | 1.028326657 | 0.000506425 | 0.010489143 | 24.13745095 | 9.410233246 | Suprabasal  | SOX2, SOX2 + KLF5 |
| USP42     | 1.027599754 | 0.001526458 | 0.009387421 | 11.22238109 | 3.728432416 | Superficial | SOX2              |
| APEX2     | 1.026096018 | 0.000992312 | 0.008042817 | 25.71451459 | 9.11992571  | Superficial | SOX2              |
| RAP2C     | 1.025837921 | 0.000401828 | 0.007176147 | 31.69093352 | 10.06563417 | Superficial | SOX2              |
| CGN       | 1.025734272 | 0.001526458 | 0.009387421 | 44.55844951 | 16.51730629 | Superficial | SOX2              |
| HCFC2     | 1.025545192 | 0.001526458 | 0.009387421 | 17.90303463 | 5.748783799 | Superficial | SOX2              |
| CLIP1     | 1.025361477 | 0.000250281 | 0.012455402 | 51.95265842 | 26.04386187 | Basal       | SOX2              |
| SRFBP1    | 1.025231274 | 0.006166656 | 0.020290909 | 20.35835208 | 6.194081963 | Superficial | SOX2              |
| SFN       | 1.024113903 | 0.003462059 | 0.014108599 | 86.40801124 | 59.03093976 | Superficial | SOX2              |
| CHMP7     | 1.023040049 | 0.004211401 | 0.016013117 | 14.31554793 | 5.15490207  | Superficial | SOX2              |
| SEMA4C    | 1.020675853 | 0.000401828 | 0.012455402 | 13.60453169 | 4.878061834 | Basal       | SOX2              |
| IMMT      | 1.020403361 | 0.007423146 | 0.022959455 | 41.15591597 | 13.86769913 | Superficial | SOX2              |
| MED27     | 1.016751381 | 0.001883197 | 0.010234018 | 20.7375588  | 6.37266373  | Superficial | SOX2              |
| STK39     | 1.016669337 | 0.001883197 | 0.018415354 | 21.59722621 | 8.154177809 | Basal       | SOX2              |
| VCL       | 1.016433297 | 0.000250281 | 0.012455402 | 50.18358999 | 23.40486234 | Basal       | SOX2 + KLF5, SOX2 |
| GLG1      | 1.014764777 | 0.000506425 | 0.007178523 | 38.66809769 | 13.84952322 | Superficial | SOX2              |
| DGKH      | 1.014239019 | 0.012681065 | 0.033478436 | 16.90556525 | 3.927563317 | Superficial | SOX2              |
| SPIRE2    | 1.012985199 | 0.010644787 | 0.038255467 | 4.88784887  | 2.320639171 | Suprabasal  | KLF5, SOX2        |
| PDIA4     | 1.011720547 | 0.006166656 | 0.020290909 | 44.57312376 | 18.01306715 | Superficial | SOX2              |
| IPO8      | 1.011278306 | 0.002315114 | 0.011381143 | 19.10865866 | 6.340994881 | Superficial | SOX2              |
| WRNIP1    | 1.01058191  | 0.000401828 | 0.007176147 | 31.36699098 | 10.96769113 | Superficial | SOX2              |
| MRPL35    | 1.009994966 | 0.001526458 | 0.009387421 | 44.0994244  | 15.84466649 | Superficial | SOX2              |
| CYP2J2    | 1.009979358 | 0.002836074 | 0.012662188 | 39.69669461 | 14.93332307 | Superficial | SOX2              |
| SSBP2     | 1.008614228 | 0.003462059 | 0.014108599 | 34.56102056 | 10.69519446 | Superficial | SOX2              |
| EMP2      | 1.008286992 | 0.000401828 | 0.007176147 | 85.15076119 | 65.60610945 | Superficial | SOX2              |
| ELOVL1    | 1.007657584 | 0.002836074 | 0.012662188 | 67.73851337 | 30.2888522  | Superficial | SOX2              |
| WIZ       | 1.003348574 | 0.004211401 | 0.016013117 | 14.06167781 | 4.932187334 | Superficial | SOX2              |
| FLYWCH1   | 1.003246571 | 0.015054848 | 0.048140298 | 13.30169272 | 6.134460931 | Suprabasal  | SOX2              |
| PANK3     | 1.002008835 | 0.005105016 | 0.018023407 | 42.2483754  | 14.84793779 | Superficial | SOX2              |
| ERBB2     | 1.000797318 | 0.003462059 | 0.014108599 | 64.90384468 | 29.36807898 | Superficial | SOX2              |
| GJB2      | 1.000707221 | 0.015054848 | 0.038009884 | 77.54819408 | 42.9288687  | Superficial | SOX2              |
| SREBF2    | 1.000004846 | 0.001526458 | 0.009387421 | 46.98351695 | 20.86267964 | Superficial | SOX2              |
| NAA35     | 0.999499739 | 0.000250281 | 0.007176147 | 24.88781225 | 7.308081533 | Superficial | SOX2              |
| OAS3      | 0.999411652 | 0.017811616 | 0.043066688 | 33.91694122 | 9.730762134 | Superficial | SOX2              |
| SLC4A2    | 0.998539121 | 0.000506425 | 0.007178523 | 17.02633306 | 5.480113383 | Superficial | SOX2              |
| RNF220    | 0.998062117 | 0.001526458 | 0.009387421 | 21.53668386 | 7.445293659 | Superficial | SOX2              |
| CYP3A5    | 0.997896563 | 0.008904627 | 0.025990329 | 33.40356    | 12.07692171 | Superficial | SOX2              |
| PREP      | 0.997620789 | 0.000506425 | 0.007178523 | 18.8332859  | 5.754453574 | Superficial | SOX2              |
| ANKRD50   | 0.997212216 | 0.006166656 | 0.020290909 | 10.84753741 | 3.542220569 | Superficial | SOX2              |
| SMARCAD1  | 0.996268912 | 0.007423146 | 0.022959455 | 14.35571326 | 4.114308749 | Superficial | SOX2              |
| CLASP2    | 0.995469306 | 0.021001058 | 0.04834985  | 17.84008933 | 5.495820276 | Superficial | SOX2              |
| CREB3     | 0.993048401 | 0.021001058 | 0.04834985  | 16.08875673 | 6.82847754  | Superficial | SOX2              |
| GSN       | 0.992984158 | 0.000250281 | 0.012455402 | 80.3245791  | 55.83838799 | Basal       | SOX2, KLF5        |
| PLCH2     | 0.990452369 | 0.000317696 | 0.010489143 | 19.86664017 | 9.082930267 | Suprabasal  | SOX2              |
| KDM1B     | 0.988968052 | 0.001883197 | 0.010234018 | 17.13891304 | 5.515185538 | Superficial | SOX2              |
| MAPKAPK3  | 0.985942266 | 0.000250281 | 0.007176147 | 61.16829182 | 27.56571044 | Superficial | SOX2              |
| N4BP3     | 0.982741775 | 0.000317696 | 0.012455402 | 13.99363767 | 5.703652307 | Basal       | SOX2              |
| RAB3GAP2  | 0.981611807 | 0.000795824 | 0.007615337 | 30.71255762 | 10.52537581 | Superficial | SOX2              |
| CDC40     | 0.979458465 | 0.001526458 | 0.009387421 | 42.10328835 | 14.46730754 | Superficial | SOX2              |
| APOBEC3B  | 0.978993045 | 0.006166656 | 0.032981404 | 10.8000218  | 4.018199162 | Basal       | SOX2              |
| ETV4      | 0.978127481 | 0.021001058 | 0.04834985  | 18.32034763 | 5.168240674 | Superficial | SOX2              |
| RBM27     | 0.976527696 | 0.000317696 | 0.007176147 | 41.41526646 | 14.85977794 | Superficial | SOX2              |
| VPS13A    | 0.975658933 | 0.001883197 | 0.010234018 | 29.64566246 | 9.650092596 | Superficial | SOX2              |
| TRIM29    | 0.975559011 | 0.003462059 | 0.014108599 | 83.4744379  | 60.80594581 | Superficial | SOX2              |
| CLNS1A    | 0.973230763 | 0.001526458 | 0.009387421 | 52.95854222 | 20.20355588 | Superficial | SOX2              |
| CLDN7     | 0.973223705 | 0.000119764 | 0.012455402 | 72.00569277 | 42.20990403 | Basal       | SOX2              |
| NFIL3     | 0.973007118 | 0.000153669 | 0.010489143 | 31.80256845 | 14.76095525 | Suprabasal  | SOX2              |
| OVOL1     | 0.972186252 | 0.004211401 | 0.027185186 | 36.62987761 | 17.67239326 | Basal       | SOX2              |
| ARL6IP6   | 0.971918062 | 0.001883197 | 0.010234018 | 27.33317617 | 8.29542678  | Superficial | SOX2              |
| VLDLR     | 0.971565055 | 0.005105016 | 0.018023407 | 34.62065303 | 10.68412266 | Superficial | SOX2              |
| EFNB2     | 0.971028932 | 0.002315114 | 0.011381143 | 34.08986984 | 10.68114608 | Superficial | SOX2 + KLF5, SOX2 |
| C5orf22   | 0.964610162 | 0.002315114 | 0.011381143 | 14.12842584 | 4.040622089 | Superficial | SOX2              |

|          |              |             |             |             |             |             |                         |
|----------|--------------|-------------|-------------|-------------|-------------|-------------|-------------------------|
| SLC35F6  | 0.963323494  | 0.004211401 | 0.016013117 | 36.32587527 | 13.4031697  | Superficial | SOX2                    |
| SBF1     | 0.962933302  | 0.000401828 | 0.012455402 | 18.97321274 | 7.722577967 | Basal       | SOX2                    |
| HEATR3   | 0.962903361  | 0.010644787 | 0.029507311 | 10.24391514 | 3.623009779 | Superficial | SOX2                    |
| GRHL2    | 0.962221635  | 0.002836074 | 0.012662188 | 26.28896804 | 9.49884602  | Superficial | SOX2                    |
| CCDC88C  | 0.960891309  | 0.008904627 | 0.025990329 | 14.82332483 | 4.120973742 | Superficial | SOX2 + KLF5             |
| OCLN     | 0.95992656   | 0.000250281 | 0.012455402 | 16.5872587  | 6.29292647  | Basal       | SOX2                    |
| GK       | 0.959674774  | 0.012681065 | 0.033478436 | 22.60421961 | 7.571280152 | Superficial | SOX2                    |
| CASP1    | 0.957510724  | 0.000795824 | 0.007615337 | 26.91963947 | 8.607716575 | Superficial | KLF5                    |
| PATJ     | 0.954789173  | 0.000119764 | 0.007176147 | 62.19275094 | 28.5356374  | Superficial | SOX2                    |
| RBM12B   | 0.951788942  | 0.007423146 | 0.022959455 | 9.07536362  | 2.496305965 | Superficial | SOX2                    |
| MBNL3    | 0.951778334  | 0.005105016 | 0.018023407 | 20.86518059 | 7.084354369 | Superficial | SOX2 + KLF5, SOX2       |
| GPHN     | 0.950352459  | 0.012681065 | 0.018023407 | 10.12383445 | 2.84515677  | Superficial | SOX2 + KLF5             |
| CLASP1   | 0.948346748  | 0.003462059 | 0.019729589 | 23.72656834 | 10.93478622 | Suprabasal  | SOX2                    |
| TJP1     | 0.947613883  | 0.000196466 | 0.012455402 | 59.43942815 | 31.52598771 | Basal       | SOX2                    |
| NTF4     | 0.947273158  | 0.012681065 | 0.042921737 | 5.706436766 | 2.210792774 | Suprabasal  | SOX2                    |
| ITPKC    | 0.9471170762 | 0.002836074 | 0.022562695 | 44.35874301 | 23.17878921 | Basal       | SOX2                    |
| SNRNP200 | 0.945149806  | 0.000506425 | 0.007178523 | 38.43103539 | 14.67962995 | Superficial | SOX2                    |
| LIMK2    | 0.943596112  | 0.002836074 | 0.012662188 | 38.02056013 | 14.07641227 | Superficial | SOX2                    |
| IFI44    | 0.942373886  | 0.012681065 | 0.042921737 | 16.09657028 | 5.918626253 | Suprabasal  | SOX2                    |
| IFNGR1   | 0.941175231  | 0.004211401 | 0.016013117 | 33.31017628 | 11.24701455 | Superficial | SOX2                    |
| TXNDC5   | 0.940628861  | 0.000795824 | 0.0136425   | 35.12375823 | 13.57082836 | Basal       | SOX2                    |
| PKP1     | 0.940526247  | 0.005105016 | 0.018023407 | 73.57168146 | 41.33040784 | Superficial | SOX2 + KLF5, SOX2, KLF5 |
| TM7SF2   | 0.940277008  | 0.003462059 | 0.014108599 | 74.58981573 | 44.97928738 | Superficial | SOX2                    |
| ATXN1    | 0.939973269  | 0.008904627 | 0.025990329 | 30.66077976 | 9.153560369 | Superficial | SOX2 + KLF5, SOX2       |
| HYAL2    | 0.939193889  | 0.008904627 | 0.025990329 | 25.45374355 | 9.165485301 | Superficial | SOX2                    |
| PIR      | 0.938528782  | 0.010644787 | 0.029507311 | 42.51794111 | 15.60827055 | Superficial | SOX2                    |
| SRCAP    | 0.937080417  | 0.004211401 | 0.021879278 | 23.12213982 | 10.22666155 | Suprabasal  | SOX2                    |
| KDM5A    | 0.936624009  | 0.000401828 | 0.007176147 | 52.87431596 | 22.545332   | Superficial | SOX2                    |
| HIPK2    | 0.936277725  | 0.000795824 | 0.007615337 | 44.33080382 | 16.53588677 | Superficial | SOX2                    |
| XPR1     | 0.935980881  | 0.008904627 | 0.034252903 | 13.83697012 | 5.461275977 | Suprabasal  | SOX2                    |
| C11orf80 | 0.934813283  | 0.001883197 | 0.010234018 | 19.61554888 | 7.757036142 | Superficial | SOX2                    |
| TLCD1    | 0.934508989  | 0.008904627 | 0.025990329 | 26.94830138 | 9.425029458 | Superficial | SOX2                    |
| IL15     | 0.931288218  | 0.002836074 | 0.0176927   | 10.39551987 | 3.705311357 | Suprabasal  | SOX2, SOX2 + KLF5       |
| IGF1R    | 0.930404525  | 0.003462059 | 0.019729589 | 35.5263818  | 16.47930112 | Suprabasal  | SOX2                    |
| VPS16    | 0.930332913  | 0.003462059 | 0.014108599 | 23.27652963 | 9.006523619 | Superficial | SOX2                    |
| PARN     | 0.930213959  | 0.015054848 | 0.038009884 | 13.26146873 | 4.826815714 | Superficial | SOX2                    |
| IFIH1    | 0.930212135  | 0.007423146 | 0.030449933 | 37.56081844 | 17.67361083 | Suprabasal  | SOX2 + KLF5             |
| MLKL     | 0.929694873  | 0.007423146 | 0.022959455 | 13.79556589 | 5.302842768 | Superficial | SOX2                    |
| BCL6     | 0.929155584  | 0.004211401 | 0.021879278 | 25.26670431 | 10.89606288 | Suprabasal  | SOX2                    |
| SULF2    | 0.926816247  | 0.004211401 | 0.021879278 | 56.00061141 | 30.06269751 | Suprabasal  | SOX2                    |
| SPRY2    | 0.92469581   | 0.003462059 | 0.019729589 | 9.968966492 | 3.716915077 | Suprabasal  | SOX2                    |
| RPUSD3   | 0.921826912  | 0.004211401 | 0.016013117 | 36.06544029 | 14.38430226 | Superficial | SOX2                    |
| TNKS1BP1 | 0.921810736  | 0.000401828 | 0.007176147 | 43.2456963  | 17.19199187 | Superficial | SOX2                    |
| METTL16  | 0.921425744  | 0.015054848 | 0.038009884 | 10.71836209 | 3.663641463 | Superficial | SOX2                    |
| THUMPD1  | 0.921027525  | 0.000795824 | 0.007615337 | 35.43257965 | 11.99410572 | Superficial | SOX2                    |
| MORC4    | 0.919114825  | 0.021001058 | 0.04834985  | 19.5822702  | 6.690165479 | Superficial | SOX2                    |
| SMPD3    | 0.91883153   | 0.012681065 | 0.033478436 | 9.692248683 | 3.781776836 | Superficial | SOX2, KLF5, SOX2 + KLF5 |
| CTSS     | 0.918754346  | 0.003462059 | 0.019729589 | 58.74895434 | 32.65659344 | Suprabasal  | SOX2                    |
| DDX23    | 0.918262459  | 0.000635975 | 0.007274975 | 33.28708232 | 12.49172321 | Superficial | SOX2                    |
| DNAJC11  | 0.918087484  | 0.005105016 | 0.018023407 | 17.65883872 | 6.07592926  | Superficial | SOX2                    |
| CHD1     | 0.916971655  | 0.002315114 | 0.011381143 | 29.52238981 | 10.04115794 | Superficial | SOX2                    |
| NUP133   | 0.914397334  | 0.015054848 | 0.038009884 | 13.23558916 | 4.066194821 | Superficial | SOX2                    |
| ZNF532   | 0.913554972  | 0.008904627 | 0.034252903 | 14.08271725 | 5.827776916 | Suprabasal  | SOX2                    |
| ANK3     | 0.913274645  | 0.012681065 | 0.033478436 | 32.92849736 | 10.82374859 | Superficial | SOX2 + KLF5             |
| PEX26    | 0.911924325  | 0.021001058 | 0.04834985  | 17.34632142 | 5.907570971 | Superficial | SOX2                    |
| RTCB     | 0.910029323  | 0.000506425 | 0.007178523 | 64.11821594 | 31.35594231 | Superficial | SOX2                    |
| AFG3L2   | 0.909662689  | 0.001526458 | 0.009387421 | 45.0308695  | 18.25711922 | Superficial | SOX2                    |
| UBE3C    | 0.908984058  | 0.002315114 | 0.011381143 | 28.28995982 | 9.861957868 | Superficial | SOX2                    |
| SCEL     | 0.908585979  | 0.004211401 | 0.027185186 | 35.21521921 | 18.03409494 | Basal       | SOX2                    |
| CCAR1    | 0.908014534  | 0.008904627 | 0.025990329 | 41.8177982  | 14.38612398 | Superficial | SOX2                    |
| TNFSF10  | 0.906889478  | 0.001526458 | 0.016792744 | 90.0032318  | 67.96705726 | Basal       | SOX2, KLF5              |
| SLC45A4  | 0.906108969  | 0.008904627 | 0.040392504 | 8.764812014 | 2.929838771 | Basal       | SOX2                    |
| MAGED2   | 0.905063097  | 0.000635975 | 0.007274975 | 36.3342794  | 13.70758675 | Superficial | SOX2                    |
| BCR      | 0.904694009  | 0.000795824 | 0.0136425   | 21.22696209 | 8.213040475 | Basal       | SOX2                    |
| ITPR3    | 0.90283063   | 0.001526458 | 0.016792744 | 27.31887442 | 11.01249269 | Basal       | SOX2                    |
| ARHGEF5  | 0.902031503  | 0.004211401 | 0.021879278 | 49.08157174 | 27.73966165 | Suprabasal  | SOX2                    |
| TBC1D10A | 0.901080387  | 0.004211401 | 0.016013117 | 31.31177269 | 11.81774667 | Superficial | SOX2                    |
| ANKIB1   | 0.900545456  | 0.000153669 | 0.007176147 | 37.04964394 | 13.30203144 | Superficial | SOX2                    |
| SLC4A7   | 0.899999926  | 0.017811616 | 0.043066688 | 6.29061434  | 1.861275296 | Superficial | SOX2 + KLF5             |
| FXYD3    | 0.899656014  | 0.002315114 | 0.011381143 | 87.03589411 | 66.84367355 | Superficial | SOX2                    |
| CDKAL1   | 0.89933994   | 0.000506425 | 0.007178523 | 11.61467749 | 3.791144178 | Superficial | SOX2                    |
| FURIN    | 0.899232364  | 0.000153669 | 0.012455402 | 17.94979085 | 6.915633525 | Basal       | SOX2                    |
| CAMSAP1  | 0.899201892  | 0.000119764 | 0.012455402 | 33.88678212 | 15.33563619 | Basal       | SOX2                    |
| PHC2     | 0.896625623  | 0.001883197 | 0.010234018 | 17.54207804 | 6.22869448  | Superficial | SOX2                    |
| LRRC42   | 0.895968102  | 0.001232925 | 0.008679903 | 32.72943189 | 11.61962184 | Superficial | SOX2                    |
| SLC39A6  | 0.895816619  | 0.006166656 | 0.020290909 | 16.16572683 | 4.572418678 | Superficial | SOX2                    |
| ST14     | 0.89536654   | 7.20E-05    | 0.012455402 | 50.40009109 | 25.34790976 | Basal       | SOX2, SOX2 + KLF5       |
| PLEKHG3  | 0.895015137  | 0.015054848 | 0.038009884 | 13.95511449 | 4.823953346 | Superficial | SOX2                    |
| TIAM1    | 0.894450063  | 0.000992312 | 0.008042817 | 54.68463967 | 24.04975501 | Superficial | SOX2                    |
| KIAA1217 | 0.893786401  | 0.000992312 | 0.008042817 | 53.56579201 | 21.83646765 | Superficial | SOX2                    |

|          |             |             |             |             |             |             |                   |
|----------|-------------|-------------|-------------|-------------|-------------|-------------|-------------------|
| SPECC1L  | 0.893320652 | 0.001232925 | 0.015721789 | 24.77042245 | 9.815567676 | Basal       | SOX2              |
| EPN2     | 0.893135704 | 0.000795824 | 0.007615337 | 63.41211342 | 30.86327485 | Superficial | SOX2 + KLF5       |
| BMPR2    | 0.892138295 | 0.001883197 | 0.010234018 | 38.46729266 | 14.761013   | Superficial | SOX2, SOX2 + KLF5 |
| CDCP1    | 0.890652929 | 0.000992312 | 0.008042817 | 66.76017312 | 32.69936178 | Superficial | SOX2              |
| TNRC18   | 0.889205782 | 0.017811616 | 0.043066688 | 24.24592989 | 8.527045348 | Superficial | SOX2 + KLF5, SOX2 |
| TOMM70   | 0.887267944 | 0.003462059 | 0.014108599 | 30.88206662 | 10.68652037 | Superficial | SOX2              |
| KCNK7    | 0.886984141 | 0.012681065 | 0.033478436 | 31.28106222 | 10.82219727 | Superficial | SOX2              |
| EPHB3    | 0.885669184 | 0.001526458 | 0.016792744 | 17.94114574 | 7.389341179 | Basal       | SOX2, KLF5        |
| BMPR1A   | 0.882293181 | 0.003462059 | 0.014108599 | 12.01608827 | 3.634607464 | Superficial | SOX2              |
| TRAF3IP1 | 0.882212095 | 0.005105016 | 0.018023407 | 14.53927799 | 4.312759643 | Superficial | SOX2              |
| NOL10    | 0.882088665 | 0.015054848 | 0.038009884 | 17.02148532 | 6.188813952 | Superficial | SOX2 + KLF5, SOX2 |
| RNF19B   | 0.881491342 | 0.000506425 | 0.012898798 | 25.32034955 | 10.32639443 | Basal       | SOX2 + KLF5, SOX2 |
| UGCG     | 0.880956022 | 0.000317696 | 0.012455402 | 41.6884798  | 18.93866914 | Basal       | SOX2, SOX2 + KLF5 |
| ABLIM2   | 0.87843226  | 0.001232925 | 0.012246384 | 21.47830619 | 10.05916517 | Suprabasal  | SOX2              |
| CEP170B  | 0.878140221 | 0.000401828 | 0.012455402 | 19.88590991 | 7.313422792 | Basal       | SOX2              |
| MORC2    | 0.87731019  | 0.001526458 | 0.009387421 | 11.36270155 | 3.478454545 | Superficial | SOX2              |
| FTS3J    | 0.876905147 | 0.000635975 | 0.007274975 | 19.33425643 | 6.629415989 | Superficial | SOX2              |
| NOTCH1   | 0.876227202 | 0.003462059 | 0.024854712 | 28.32956634 | 13.11437681 | Basal       | SOX2              |
| ZDHHC16  | 0.875936954 | 0.008904627 | 0.025990329 | 18.0535891  | 6.514104604 | Superficial | SOX2              |
| IGSF3    | 0.875568181 | 0.004211401 | 0.016013117 | 20.64854284 | 7.060117599 | Superficial | SOX2              |
| METTL14  | 0.875376042 | 0.002836074 | 0.012662188 | 20.15456999 | 6.39679254  | Superficial | SOX2              |
| HDGF     | 0.875145778 | 0.000506425 | 0.007178523 | 63.33322983 | 30.12978082 | Superficial | SOX2              |
| BTG1     | 0.874641303 | 7.20E-05    | 0.007176147 | 76.33575407 | 46.98814185 | Superficial | SOX2, SOX2 + KLF5 |
| CHRA1    | 0.874329147 | 0.001526458 | 0.009387421 | 32.58122904 | 11.03633825 | Superficial | SOX2              |
| PPP1R26  | 0.874196498 | 0.000795824 | 0.010838271 | 9.010442668 | 3.864186864 | Suprabasal  | SOX2              |
| CAMSAP3  | 0.873243075 | 0.001232925 | 0.015721789 | 12.6460338  | 5.306066422 | Basal       | SOX2              |
| TP53RK   | 0.873165537 | 0.001883197 | 0.010234018 | 34.69402433 | 13.34150254 | Superficial | SOX2              |
| LETM1    | 0.872109216 | 0.000635975 | 0.007274975 | 48.00505357 | 21.60553929 | Superficial | SOX2              |
| RBM19    | 0.870734356 | 0.008904627 | 0.025990329 | 9.455645202 | 3.177116214 | Superficial | SOX2              |
| NOP14    | 0.870040844 | 0.012681065 | 0.033478436 | 17.67069829 | 5.687473923 | Superficial | SOX2              |
| SLC25A46 | 0.869726759 | 0.010644787 | 0.029507311 | 27.18592165 | 9.768766573 | Superficial | SOX2              |
| NLRX1    | 0.869680205 | 0.006166656 | 0.020290909 | 44.2626525  | 19.65292128 | Superficial | SOX2              |
| ADCK2    | 0.869583124 | 0.007423146 | 0.022959455 | 21.60813141 | 8.531418818 | Superficial | SOX2              |
| RAB3D    | 0.86952271  | 0.015054848 | 0.038009884 | 36.43417123 | 14.40115223 | Superficial | SOX2              |
| HNRNPAB  | 0.868905205 | 0.002836074 | 0.012662188 | 55.3602438  | 22.22158232 | Superficial | SOX2              |
| CSNK1G3  | 0.868108155 | 0.000635975 | 0.007274975 | 25.97849208 | 8.715818884 | Superficial | SOX2              |
| PLXNA2   | 0.867985641 | 0.006166656 | 0.020290909 | 29.09724384 | 8.662493629 | Superficial | SOX2              |
| POLR3A   | 0.867854544 | 0.017811616 | 0.043066688 | 9.674285364 | 2.890829878 | Superficial | SOX2              |
| PLOD2    | 0.867405121 | 0.003462059 | 0.014108599 | 24.23100976 | 7.329784954 | Superficial | SOX2              |
| CLOCK    | 0.867335537 | 0.015054848 | 0.038009884 | 35.97663274 | 12.96369281 | Superficial | SOX2              |
| VRK2     | 0.866624796 | 0.002836074 | 0.012662188 | 27.63407787 | 9.880195058 | Superficial | SOX2              |
| MTA2     | 0.866164613 | 0.017811616 | 0.043066688 | 24.48027662 | 10.40104993 | Superficial | SOX2              |
| IRF1     | 0.864606905 | 7.20E-05    | 0.012455402 | 66.36951881 | 38.12897296 | Basal       | SOX2              |
| SPSB2    | 0.863671948 | 0.021001058 | 0.04834985  | 12.26063796 | 4.552374875 | Superficial | SOX2              |
| UNC45A   | 0.863347383 | 0.008904627 | 0.025990329 | 30.21492431 | 11.95655965 | Superficial | SOX2              |
| FAM110C  | 0.863318044 | 0.000401828 | 0.010489143 | 49.1183436  | 27.19016149 | Suprabasal  | SOX2, SOX2 + KLF5 |
| RNF214   | 0.860639186 | 0.000992312 | 0.008042817 | 20.37905803 | 7.210504233 | Superficial | SOX2              |
| NLN      | 0.860495589 | 0.002836074 | 0.012662188 | 10.91799313 | 3.618501469 | Superficial | SOX2              |
| NSMAF    | 0.858277222 | 0.012681065 | 0.033478436 | 11.88905994 | 4.845257228 | Superficial | SOX2              |
| TPST1    | 0.858189681 | 0.000992312 | 0.01142308  | 22.00115385 | 9.487918828 | Suprabasal  | SOX2              |
| MCMBP    | 0.856648759 | 0.000401828 | 0.007176147 | 28.42016649 | 10.86479165 | Superficial | SOX2              |
| OSBP     | 0.855633877 | 0.006166656 | 0.020290909 | 40.09049547 | 16.42969957 | Superficial | SOX2              |
| FAS      | 0.855309759 | 0.000196466 | 0.010489143 | 28.48938444 | 12.96714597 | Suprabasal  | SOX2              |
| LUZP1    | 0.855211261 | 0.000196466 | 0.007176147 | 37.10983106 | 13.77168569 | Superficial | SOX2              |
| SLC10A3  | 0.855190282 | 0.008904627 | 0.025990329 | 24.99035341 | 9.877241285 | Superficial | SOX2              |
| PDCD4    | 0.852743281 | 0.005105016 | 0.018023407 | 76.60735903 | 42.69342999 | Superficial | SOX2              |
| PHF14    | 0.852521794 | 0.002836074 | 0.012662188 | 29.36397933 | 9.593443001 | Superficial | SOX2              |
| HDAC1    | 0.851318097 | 0.000992312 | 0.008042817 | 61.95501145 | 30.23757095 | Superficial | SOX2              |
| FCHSD2   | 0.850963554 | 0.002836074 | 0.0176927   | 8.91420517  | 4.048490828 | Suprabasal  | SOX2 + KLF5       |
| ERCC3    | 0.849248528 | 0.008904627 | 0.025990329 | 12.5092704  | 4.311489353 | Superficial | SOX2              |
| DMRTA2   | 0.848884765 | 0.002315114 | 0.016074975 | 6.741522978 | 3.19563976  | Suprabasal  | SOX2              |
| ALCAM    | 0.848190649 | 0.007423146 | 0.022959455 | 11.32639601 | 3.871626927 | Superficial | SOX2 + KLF5, SOX2 |
| SKIV2L   | 0.848108426 | 0.000506425 | 0.007178523 | 13.76146259 | 4.464769501 | Superficial | SOX2              |
| DSC2     | 0.846921441 | 0.017811616 | 0.043066688 | 72.26288159 | 40.41740992 | Superficial | SOX2              |
| DTNBP1   | 0.846794959 | 0.021001058 | 0.04834985  | 14.28105129 | 4.932464707 | Superficial | SOX2 + KLF5       |
| BORCS5   | 0.846268858 | 0.002836074 | 0.012662188 | 20.25345521 | 7.504594465 | Superficial | SOX2              |
| POLE     | 0.846155403 | 0.002836074 | 0.0176927   | 3.740452375 | 3.782665953 | Suprabasal  | SOX2              |
| MAP3K8   | 0.845745236 | 0.004211401 | 0.027185186 | 25.65143559 | 12.18378813 | Basal       | SOX2, SOX2 + KLF5 |
| RUFY3    | 0.844831691 | 0.000635975 | 0.007274975 | 44.04485076 | 16.50861145 | Superficial | SOX2              |
| ITGA3    | 0.844554837 | 0.007423146 | 0.030449933 | 13.76692359 | 6.266478229 | Suprabasal  | SOX2              |
| ARFGEF2  | 0.844127629 | 0.002315114 | 0.011381143 | 41.32971032 | 15.23832937 | Superficial | SOX2              |
| SPNS1    | 0.842942886 | 0.003462059 | 0.014108599 | 21.89951967 | 7.858241511 | Superficial | SOX2              |
| UBR5     | 0.842481048 | 0.006166656 | 0.020290909 | 41.02552479 | 15.33512244 | Superficial | SOX2              |
| ALG9     | 0.839853938 | 0.007423146 | 0.022959455 | 10.62872224 | 4.26325388  | Superficial | SOX2              |
| MTHFD1L  | 0.839822411 | 0.007423146 | 0.036548425 | 14.53056637 | 6.246920981 | Basal       | SOX2              |
| CHD4     | 0.839801259 | 0.000635975 | 0.007274975 | 57.16082184 | 26.07656657 | Superficial | SOX2              |
| OAF      | 0.839505259 | 0.003462059 | 0.019729589 | 13.15030459 | 5.79206902  | Suprabasal  | SOX2              |
| MAP4     | 0.839469094 | 0.000506425 | 0.007178523 | 56.55506459 | 24.597045   | Superficial | SOX2              |
| GLE1     | 0.835935781 | 0.008904627 | 0.025990329 | 16.91032054 | 5.336535038 | Superficial | SOX2              |
| NECTIN4  | 0.835610283 | 0.000635975 | 0.012925379 | 30.87073029 | 15.59987036 | Basal       | SOX2              |

|          |             |              |             |             |             |             |                   |
|----------|-------------|--------------|-------------|-------------|-------------|-------------|-------------------|
| IWS1     | 0.83526127  | 0.001526458  | 0.009387421 | 33.72332735 | 12.23744966 | Superficial | SOX2              |
| RBM12    | 0.834785213 | 0.001232925  | 0.008679903 | 23.96776883 | 8.159807832 | Superficial | SOX2              |
| CCDC71L  | 0.834591944 | 0.006166656  | 0.020290909 | 18.69169873 | 6.190759114 | Superficial | SOX2              |
| MACC1    | 0.834417685 | 0.001883197  | 0.018415354 | 24.81749513 | 10.86425508 | Basal       | SOX2 + KLF5, SOX2 |
| HES1     | 0.834394053 | 0.015054848  | 0.038009884 | 72.77617354 | 40.31242283 | Superficial | SOX2              |
| DNMBP    | 0.834004899 | 0.017811616  | 0.043066688 | 12.19837134 | 4.683669686 | Superficial | SOX2 + KLF5       |
| EFL1     | 0.833887149 | 0.002836074  | 0.012662188 | 12.54418382 | 4.708387837 | Superficial | SOX2              |
| YLP1     | 0.833877819 | 0.004211401  | 0.016013117 | 21.20338158 | 7.420526934 | Superficial | SOX2              |
| PHC3     | 0.833132444 | 0.021001058  | 0.04834985  | 15.7324662  | 4.172159185 | Superficial | SOX2              |
| ARHGAP1  | 0.832801399 | 0.001526458  | 0.009387421 | 49.16523241 | 21.6705731  | Superficial | SOX2              |
| MTMR4    | 0.832773168 | 0.012681065  | 0.033478436 | 12.61282616 | 4.384877816 | Superficial | SOX2              |
| USP34    | 0.831927479 | 0.000250281  | 0.007176147 | 48.76179144 | 19.59301972 | Superficial | SOX2              |
| LTN1     | 0.831844928 | 0.003462059  | 0.014108599 | 32.27681339 | 10.69037507 | Superficial | SOX2              |
| SAMD8    | 0.83084174  | 0.007423146  | 0.022959455 | 30.77720131 | 12.43241064 | Superficial | SOX2              |
| LTBP4    | 0.830027435 | 0.000795824  | 0.010838271 | 42.65305007 | 22.45104814 | Suprabasal  | SOX2              |
| EFNB1    | 0.828770052 | 0.007423146  | 0.022959455 | 12.44857866 | 4.371969674 | Superficial | SOX2              |
| TAF15    | 0.827829113 | 0.002836074  | 0.012662188 | 46.64494557 | 17.66507047 | Superficial | SOX2              |
| ZNF205   | 0.827619182 | 0.006166656  | 0.020290909 | 9.321767583 | 3.501849539 | Superficial | SOX2              |
| DSC3     | 0.82685136  | 0.021001058  | 0.04834985  | 60.40379599 | 27.05844558 | Superficial | SOX2 + KLF5, SOX2 |
| TDG      | 0.826493209 | 0.005105016  | 0.018023407 | 45.1714113  | 18.47106601 | Superficial | SOX2              |
| PPA2     | 0.825614967 | 0.000795824  | 0.007615337 | 45.85643088 | 18.36050404 | Superficial | SOX2              |
| EPB41L2  | 0.825187272 | 0.012681065  | 0.042921737 | 13.2310882  | 5.383598174 | Suprabasal  | SOX2              |
| RHOV     | 0.824745801 | 0.000506425  | 0.012898798 | 55.32474773 | 31.36023103 | Basal       | SOX2              |
| THOC3    | 0.823897476 | 0.010644787  | 0.029507311 | 59.47882876 | 28.67750392 | Superficial | SOX2              |
| TWF2     | 0.823549219 | 0.000992312  | 0.008042817 | 58.15254953 | 27.21826086 | Superficial | SOX2 + KLF5       |
| ATRN     | 0.823194799 | 0.021001058  | 0.04834985  | 17.37967553 | 6.135836441 | Superficial | SOX2              |
| PPL      | 0.822801611 | 0.000317696  | 0.012455402 | 57.78159745 | 33.11426547 | Basal       | SOX2, SOX2 + KLF5 |
| FBXO38   | 0.822800065 | 0.000992312  | 0.008042817 | 19.93874301 | 6.63278819  | Superficial | SOX2              |
| MRPS35   | 0.82271128  | 0.012681065  | 0.033478436 | 41.47677578 | 15.25102828 | Superficial | SOX2              |
| ACAD9    | 0.822605788 | 0.000401828  | 0.007176147 | 36.21095613 | 14.39931058 | Superficial | SOX2 + KLF5       |
| SNX12    | 0.822585602 | 0.006166656  | 0.020290909 | 25.06938895 | 11.27638862 | Superficial | SOX2              |
| TFAP2A   | 0.820450997 | 0.002315114  | 0.011381143 | 42.82071234 | 17.82890683 | Superficial | SOX2              |
| ATN1     | 0.819507951 | 0.000992312  | 0.008042817 | 32.18520156 | 12.76600372 | Superficial | SOX2              |
| CPT2     | 0.818968522 | 0.015054848  | 0.038009884 | 23.64381963 | 8.697933431 | Superficial | SOX2              |
| SPTLC2   | 0.817816947 | 0.008904627  | 0.025990329 | 58.58796534 | 29.63327216 | Superficial | SOX2              |
| HACE1    | 0.816745618 | 0.008904627  | 0.034252903 | 13.23797985 | 6.170834204 | Suprabasal  | SOX2              |
| PIM1     | 0.816682613 | 0.000506425  | 0.012898798 | 35.4644167  | 17.60863066 | Basal       | SOX2 + KLF5, SOX2 |
| DHX16    | 0.816455155 | 0.000992312  | 0.008042817 | 20.49134581 | 7.234232442 | Superficial | SOX2              |
| DNAAF2   | 0.815990058 | 0.008904627  | 0.025990329 | 12.88862781 | 5.011421676 | Superficial | SOX2              |
| SDC1     | 0.813719129 | 0.002315114  | 0.011381143 | 87.75694466 | 66.95145226 | Superficial | SOX2              |
| ELL3     | 0.813317704 | 0.015054848  | 0.048140298 | 7.192728655 | 3.329046936 | Suprabasal  | SOX2              |
| CCNE1    | 0.812722988 | 0.001883197  | 0.018415354 | 11.8773326  | 5.413782807 | Basal       | SOX2              |
| PLXNB2   | 0.812108846 | 0.01232925   | 0.015721789 | 46.65187659 | 22.95899987 | Basal       | SOX2              |
| WDR47    | 0.811734977 | 5.55E-05     | 0.012455402 | 35.21788058 | 15.80573817 | Basal       | SOX2              |
| MID1IP1  | 0.810782697 | 0.002836074  | 0.012662188 | 33.06994348 | 13.45685532 | Superficial | SOX2              |
| MFN1     | 0.810406977 | 0.000795824  | 0.007615337 | 37.4800731  | 14.78617492 | Superficial | SOX2              |
| EFNA4    | 0.809859537 | 0.003462059  | 0.014108599 | 21.55207442 | 7.257920127 | Superficial | SOX2              |
| ARMCX3   | 0.808889184 | 0.001883197  | 0.010234018 | 22.49931016 | 7.20222225  | Superficial | SOX2              |
| DDX46    | 0.808617792 | 0.001883197  | 0.010234018 | 55.8352134  | 23.18074829 | Superficial | SOX2              |
| NXF1     | 0.808612993 | 0.021001058  | 0.04834985  | 18.32360737 | 7.616265295 | Superficial | SOX2              |
| NDUFV1   | 0.808605636 | 0.008904627  | 0.025990329 | 58.69079218 | 25.16361058 | Superficial | SOX2              |
| KIF1C    | 0.808132244 | 0.000401828  | 0.012455402 | 35.31714962 | 16.56280017 | Basal       | SOX2              |
| CDKN2D   | 0.807747808 | 0.017811616  | 0.043066688 | 31.18476328 | 12.50599597 | Superficial | SOX2              |
| TMED5    | 0.807701462 | 0.001883197  | 0.010234018 | 40.71109999 | 16.55487528 | Superficial | SOX2              |
| ANKRD22  | 0.804461386 | 0.001526458  | 0.009387421 | 53.90767745 | 23.26610733 | Superficial | SOX2              |
| MCPH1    | 0.800090408 | 0.012681065  | 0.033478436 | 17.43680128 | 6.513088304 | Superficial | SOX2              |
| FNDC3A   | 0.800001038 | 0.004211401  | 0.016013117 | 20.19240284 | 7.23045575  | Superficial | SOX2              |
| SIRT1    | 0.799938477 | 0.007423146  | 0.022959455 | 14.80977543 | 4.692575729 | Superficial | SOX2              |
| LRPPRC   | 0.798944589 | 0.021001058  | 0.04834985  | 31.40078505 | 9.816116635 | Superficial | SOX2              |
| ATP5F1A  | 0.798738249 | 0.006166656  | 0.020290909 | 71.23746796 | 38.86356897 | Superficial | SOX2              |
| CPSF2    | 0.798423626 | 0.000992312  | 0.008042817 | 34.48820073 | 13.36730562 | Superficial | SOX2              |
| UBALD2   | 0.798313434 | 0.000250281  | 0.012455402 | 58.45055428 | 32.53669687 | Basal       | SOX2              |
| SFPQ     | 0.797818023 | 0.001232925  | 0.008679903 | 61.97537887 | 29.57785022 | Superficial | SOX2              |
| SLC52A2  | 0.797173775 | 0.010644787  | 0.029507311 | 28.79074487 | 10.90435535 | Superficial | SOX2              |
| NFRKB    | 0.797033244 | 0.004211401  | 0.016013117 | 12.0529207  | 4.844985206 | Superficial | SOX2              |
| ABHD13   | 0.796556468 | 0.000992312  | 0.008042817 | 22.41406526 | 8.264951864 | Suprabasal  | SOX2              |
| ARHGAP21 | 0.795336566 | 0.0014211401 | 0.021879278 | 36.03350368 | 18.17611891 | Suprabasal  | SOX2              |
| EVPL     | 0.793544001 | 0.000795824  | 0.0136425   | 44.99753962 | 23.63771042 | Basal       | SOX2              |
| MSH3     | 0.793458301 | 0.003462059  | 0.014108599 | 22.98398105 | 7.918764414 | Superficial | SOX2              |
| ARL1     | 0.79214833  | 0.001232925  | 0.008679903 | 71.80733536 | 42.39486522 | Superficial | SOX2              |
| KCTD1    | 0.790819901 | 0.000795824  | 0.007615337 | 50.90920202 | 21.19738831 | Superficial | SOX2, SOX2 + KLF5 |
| FAM199X  | 0.790489698 | 0.000992312  | 0.008042817 | 33.68678037 | 12.41133265 | Superficial | SOX2              |
| IPPK     | 0.790086212 | 0.021001058  | 0.04834985  | 32.36939208 | 11.4416446  | Superficial | SOX2              |
| GRIPAP1  | 0.790033602 | 0.000992312  | 0.008042817 | 32.41525033 | 11.48465582 | Superficial | SOX2              |
| IGSF8    | 0.789619705 | 0.002315114  | 0.011381143 | 14.91047128 | 5.385316998 | Superficial | SOX2              |
| SMARCE1  | 0.788128386 | 0.000401828  | 0.007176147 | 53.98102131 | 23.8797572  | Superficial | SOX2              |
| PAK1     | 0.786995191 | 0.000635975  | 0.007274975 | 29.64145241 | 11.08264459 | Superficial | SOX2              |
| SLC22A18 | 0.786650694 | 0.000992312  | 0.008042817 | 27.90101417 | 9.786049759 | Superficial | SOX2              |
| SCRIB    | 0.785180723 | 0.000317696  | 0.012455402 | 24.07048471 | 10.71812052 | Basal       | SOX2              |
| PPP2R1B  | 0.785024498 | 0.002836074  | 0.012662188 | 28.21036033 | 10.75997223 | Superficial | SOX2              |

|           |             |             |             |             |             |             |                   |
|-----------|-------------|-------------|-------------|-------------|-------------|-------------|-------------------|
| KLK10     | 0.784915262 | 0.001883197 | 0.018415354 | 49.63143813 | 30.40373894 | Basal       | SOX2              |
| ESRP2     | 0.784736975 | 0.003462059 | 0.014108599 | 49.49809927 | 23.21995429 | Superficial | SOX2              |
| DSP       | 0.78419116  | 0.000506425 | 0.012898798 | 95.57120634 | 83.16967388 | Basal       | SOX2, SOX2 + KLF5 |
| SUPT6H    | 0.783663486 | 0.001883197 | 0.010234018 | 39.09967722 | 17.04241278 | Superficial | SOX2              |
| NSD1      | 0.782623544 | 0.000250281 | 0.007176147 | 44.34785098 | 18.99005533 | Superficial | SOX2              |
| RARG      | 0.781083073 | 0.000401828 | 0.007176147 | 76.26745981 | 42.47873787 | Superficial | SOX2              |
| RASSF6    | 0.780974466 | 0.021001058 | 0.04834985  | 19.09196449 | 5.374914478 | Superficial | SOX2, SOX2 + KLF5 |
| TRIM5     | 0.780767742 | 0.021001058 | 0.04834985  | 14.72009644 | 4.341097256 | Superficial | SOX2              |
| ARHGAP35  | 0.779858557 | 0.000795824 | 0.007615337 | 30.72874296 | 11.10752697 | Superficial | SOX2              |
| TBRG4     | 0.777140895 | 0.017811616 | 0.043066688 | 23.73424314 | 8.528389369 | Superficial | SOX2              |
| TRABD     | 0.776314911 | 0.006166656 | 0.020290909 | 44.64577932 | 19.65405638 | Superficial | SOX2              |
| ARMCX6    | 0.776127211 | 0.001883197 | 0.010234018 | 31.53888816 | 12.22350712 | Superficial | SOX2              |
| NCOA5     | 0.775988711 | 0.008904627 | 0.025990329 | 9.113392929 | 3.455771311 | Superficial | SOX2              |
| FRMD4B    | 0.772823978 | 0.001526458 | 0.009387421 | 72.27208121 | 40.58876961 | Superficial | SOX2              |
| LAP3      | 0.771547699 | 0.001883197 | 0.010234018 | 40.8294852  | 15.63526895 | Superficial | SOX2              |
| CDC42BPB  | 0.770069085 | 0.000153669 | 0.012455402 | 39.33363482 | 18.95615945 | Basal       | SOX2              |
| SLC7A8    | 0.768503851 | 0.003462059 | 0.014108599 | 23.18110177 | 9.569188016 | Superficial | SOX2              |
| TMEM154   | 0.766978768 | 0.010644787 | 0.029507311 | 73.6246979  | 44.77279121 | Superficial | SOX2              |
| TXN       | 0.766068419 | 0.017811616 | 0.043066688 | 94.92987078 | 90.59413398 | Superficial | SOX2              |
| CAAP1     | 0.765982227 | 0.001232925 | 0.008679903 | 27.8715948  | 10.35073339 | Superficial | SOX2              |
| ZNF407    | 0.765275288 | 0.005105016 | 0.018023407 | 9.565013872 | 2.98368203  | Superficial | SOX2              |
| TAB1      | 0.765243129 | 0.008904627 | 0.025990329 | 7.66350226  | 2.519377628 | Superficial | SOX2              |
| VILL      | 0.765232309 | 0.010644787 | 0.038255467 | 12.66776283 | 5.055959665 | Suprabasal  | KLF5              |
| TPM4      | 0.765005693 | 0.002836074 | 0.022562695 | 83.37863428 | 60.677827   | Basal       | SOX2              |
| UTP6      | 0.764059543 | 0.001883197 | 0.010234018 | 24.32650647 | 9.796163309 | Superficial | SOX2              |
| ZNF142    | 0.763854846 | 0.000795824 | 0.010838271 | 7.199945873 | 3.709384109 | Suprabasal  | SOX2              |
| USP7      | 0.762927097 | 0.000506425 | 0.007178523 | 57.37381352 | 26.69855543 | Superficial | SOX2              |
| TKFC      | 0.762788105 | 0.021001058 | 0.04834985  | 15.27432299 | 5.605121704 | Superficial | SOX2              |
| TTC17     | 0.761819095 | 0.008904627 | 0.025990329 | 24.36359453 | 8.844420798 | Superficial | SOX2              |
| PXK       | 0.758536609 | 0.005105016 | 0.018023407 | 14.76121213 | 4.158985349 | Superficial | SOX2              |
| NMB       | 0.757007026 | 0.003462059 | 0.024854712 | 19.49023009 | 8.735687673 | Basal       | SOX2              |
| PIGK      | 0.75685835  | 0.010644787 | 0.029507311 | 10.61173633 | 3.827762891 | Superficial | SOX2              |
| PRPF40A   | 0.755048603 | 0.000795824 | 0.007615337 | 58.42226805 | 27.22883402 | Superficial | SOX2              |
| RIPK4     | 0.753786917 | 0.000506425 | 0.010489143 | 56.92429997 | 34.29619525 | Suprabasal  | SOX2              |
| MARCKSL1  | 0.753039523 | 0.005105016 | 0.029792864 | 19.57397271 | 7.984022926 | Basal       | SOX2              |
| COX10     | 0.75216747  | 0.017811616 | 0.043066688 | 15.53587995 | 5.187538716 | Superficial | SOX2              |
| XRN2      | 0.751931606 | 0.008904627 | 0.025990329 | 38.10142195 | 14.27251888 | Superficial | SOX2              |
| POR       | 0.751814117 | 0.000992312 | 0.008042817 | 66.781586   | 35.01139862 | Superficial | KLF5, SOX2        |
| MECOM     | 0.750699729 | 0.002315114 | 0.016074975 | 56.52334109 | 32.74640448 | Suprabasal  | KLF5              |
| PLP2      | 0.749774242 | 0.010644787 | 0.029507311 | 77.34020689 | 49.58391191 | Superficial | SOX2              |
| RAB11FIP4 | 0.74958562  | 0.002836074 | 0.022562695 | 11.93939559 | 4.465728883 | Basal       | SOX2              |
| CRADD     | 0.748667913 | 0.007423146 | 0.022959455 | 14.26033086 | 4.924503899 | Superficial | SOX2 + KLF5       |
| ATXN7L3B  | 0.748484548 | 0.000153669 | 0.007176147 | 44.03819642 | 18.55042579 | Superficial | SOX2              |
| GRIP1     | 0.747835615 | 0.003462059 | 0.019729589 | 7.134486236 | 3.06073658  | Suprabasal  | SOX2 + KLF5       |
| NIPAL1    | 0.747293766 | 0.001883197 | 0.010234018 | 58.7054824  | 29.04320719 | Superficial | SOX2              |
| RASA1     | 0.747100481 | 0.003462059 | 0.014108599 | 25.67635873 | 8.934911271 | Superficial | SOX2              |
| MFSD6     | 0.746746359 | 0.012681065 | 0.033478436 | 53.60128769 | 24.41723396 | Superficial | SOX2              |
| INTS2     | 0.746668773 | 0.010644787 | 0.029507311 | 8.778939305 | 2.442925882 | Superficial | SOX2              |
| CCDC34    | 0.746367735 | 0.001526458 | 0.013290882 | 40.02681251 | 19.40977035 | Suprabasal  | SOX2              |
| UBR7      | 0.74631484  | 0.012681065 | 0.033478436 | 16.05246902 | 5.706209921 | Superficial | SOX2              |
| SNTB2     | 0.745802206 | 0.001883197 | 0.010234018 | 27.06126241 | 9.939822852 | Superficial | SOX2              |
| MAN1A2    | 0.744280933 | 0.001883197 | 0.010234018 | 50.53089819 | 20.95246014 | Superficial | SOX2              |
| NDUFA8    | 0.743813982 | 0.004211401 | 0.016013117 | 56.18648971 | 26.12503468 | Superficial | SOX2              |
| EIF3B     | 0.74245088  | 0.005105016 | 0.018023407 | 43.13425729 | 17.85244483 | Superficial | SOX2              |
| POLR3B    | 0.74062025  | 0.000506425 | 0.007178523 | 21.82467954 | 8.464220903 | Superficial | SOX2              |
| WNK4      | 0.739616678 | 0.008904627 | 0.025990329 | 16.96339688 | 6.600647357 | Superficial | SOX2              |
| MRPS30    | 0.739498814 | 0.010644787 | 0.029507311 | 26.85606255 | 9.562664138 | Superficial | SOX2              |
| RBBP8NL   | 0.738379695 | 0.008904627 | 0.025990329 | 18.58587441 | 7.808829489 | Superficial | SOX2              |
| ARFGAP3   | 0.737414745 | 0.004211401 | 0.016013117 | 34.43334593 | 13.93679235 | Superficial | SOX2 + KLF5       |
| PRRC2B    | 0.737288087 | 0.004211401 | 0.016013117 | 37.54429978 | 15.16190471 | Superficial | SOX2              |
| CLIC4     | 0.737162028 | 0.007423146 | 0.036548425 | 18.68317984 | 8.50586959  | Basal       | SOX2              |
| AFDN      | 0.736654672 | 5.55E-05    | 0.012455402 | 48.38939108 | 25.14959746 | Basal       | SOX2              |
| PHF13     | 0.73612879  | 0.000635975 | 0.012925379 | 18.94767185 | 8.609546677 | Basal       | SOX2              |
| ZYX       | 0.735779973 | 0.015054848 | 0.038009884 | 36.28202793 | 16.07075639 | Superficial | SOX2              |
| TMEM98    | 0.735476257 | 0.008904627 | 0.034252903 | 30.33653877 | 14.52821983 | Suprabasal  | SOX2              |
| BICDL2    | 0.735059923 | 0.002315114 | 0.020052792 | 22.07254004 | 10.57748777 | Basal       | SOX2              |
| PRC1      | 0.734220942 | 0.002836074 | 0.022562695 | 44.06968575 | 25.03313541 | Basal       | SOX2              |
| ZNF131    | 0.733472982 | 0.002315114 | 0.011381143 | 25.08109627 | 8.963884002 | Superficial | SOX2              |
| PIK3R1    | 0.733066436 | 0.007423146 | 0.022959455 | 19.32332041 | 6.742500994 | Superficial | SOX2              |
| BST2      | 0.732636317 | 0.012681065 | 0.049425568 | 41.46014877 | 20.02884409 | Basal       | SOX2              |
| MGST3     | 0.732351335 | 0.010644787 | 0.029507311 | 65.51241176 | 32.75084606 | Superficial | SOX2              |
| HTATIP2   | 0.732198546 | 0.005105016 | 0.018023407 | 54.11311985 | 24.77233011 | Superficial | SOX2              |
| ZPR1      | 0.730854063 | 0.017811616 | 0.043066688 | 28.17455576 | 10.73635346 | Superficial | SOX2              |
| URI1      | 0.730252363 | 0.000795824 | 0.007615337 | 48.99660551 | 20.34154253 | Superficial | SOX2              |
| ADD3      | 0.729947864 | 0.002315114 | 0.011381143 | 66.28396552 | 34.34038086 | Superficial | KLF5              |
| EZR       | 0.72742657  | 0.002315114 | 0.020052792 | 82.97696886 | 59.68243158 | Basal       | SOX2 + KLF5, SOX2 |
| TMEM184A  | 0.726810155 | 0.006166656 | 0.032981404 | 16.76278201 | 7.803146974 | Basal       | SOX2              |
| GRB7      | 0.726375743 | 0.000317696 | 0.012455402 | 39.18241856 | 19.55517725 | Basal       | SOX2              |
| MRPL4     | 0.726193947 | 0.008904627 | 0.025990329 | 43.49259063 | 17.67791629 | Superficial | SOX2              |
| AKAP13    | 0.72614015  | 0.000635975 | 0.007274975 | 69.84387281 | 38.37719104 | Superficial | SOX2              |

|           |             |             |             |             |             |             |                   |
|-----------|-------------|-------------|-------------|-------------|-------------|-------------|-------------------|
| ICMT      | 0.726052153 | 0.000992312 | 0.014320968 | 39.13219758 | 20.3780701  | Basal       | SOX2              |
| G3BP1     | 0.72578975  | 0.017811616 | 0.043066688 | 45.8882534  | 18.82497802 | Superficial | SOX2              |
| INPP5F    | 0.725043383 | 0.007423146 | 0.022959455 | 13.93767328 | 4.990127193 | Superficial | SOX2              |
| RNF138    | 0.724834032 | 0.017811616 | 0.043066688 | 16.12579921 | 5.149135029 | Superficial | SOX2              |
| ETV3      | 0.724257442 | 0.006166656 | 0.027303057 | 36.51993618 | 18.36824247 | Suprabasal  | SOX2              |
| PBDC1     | 0.724096304 | 0.007423146 | 0.022959455 | 47.58340403 | 19.4017906  | Superficial | SOX2              |
| TBC1D4    | 0.722873499 | 0.017811616 | 0.043066688 | 9.618053519 | 3.152159836 | Superficial | SOX2              |
| WWC2      | 0.722704636 | 0.000635975 | 0.012925379 | 14.52289953 | 5.932481265 | Basal       | SOX2              |
| CD82      | 0.721546364 | 0.012681065 | 0.033478436 | 57.52904438 | 27.31531055 | Superficial | SOX2              |
| PFKP      | 0.720566334 | 0.002836074 | 0.022562695 | 42.15295301 | 21.9314053  | Basal       | SOX2              |
| GTF3C5    | 0.72007063  | 0.001526458 | 0.009387421 | 28.57071781 | 12.03709938 | Superficial | SOX2              |
| SUGT1     | 0.719687512 | 0.001232925 | 0.008679903 | 60.55400256 | 28.61191437 | Superficial | SOX2              |
| EIF4G1    | 0.718208604 | 0.000635975 | 0.012925379 | 63.74988687 | 36.77598904 | Basal       | SOX2              |
| RHBDD2    | 0.717960761 | 0.000992312 | 0.01142308  | 43.30584464 | 25.55995337 | Suprabasal  | SOX2              |
| RAB3IP    | 0.717948673 | 0.001232925 | 0.012246384 | 18.14985456 | 8.781444715 | Suprabasal  | SOX2              |
| GOPC      | 0.717192669 | 0.000506425 | 0.007178523 | 40.99698046 | 17.8396565  | Superficial | SOX2              |
| CA13      | 0.716964043 | 0.012681065 | 0.033478436 | 26.84068309 | 9.406202184 | Superficial | SOX2              |
| FOXP4     | 0.716400668 | 0.000635975 | 0.012925379 | 10.1266356  | 4.367339639 | Basal       | SOX2              |
| DIAPH1    | 0.715897124 | 0.000992312 | 0.014320968 | 49.98329195 | 26.85333151 | Basal       | SOX2              |
| MPHOSPH10 | 0.715736333 | 0.006166656 | 0.020290909 | 41.49656213 | 16.38485875 | Superficial | SOX2              |
| PPIC      | 0.715013805 | 0.015054848 | 0.038009884 | 68.41924217 | 34.96201968 | Superficial | SOX2              |
| KHDRBS1   | 0.714588018 | 0.000401828 | 0.007176147 | 62.73550413 | 29.47083304 | Superficial | SOX2              |
| UTP3      | 0.714515084 | 0.006166656 | 0.020290909 | 25.70999785 | 9.52559203  | Superficial | SOX2              |
| SPEN      | 0.713127731 | 0.002836074 | 0.012662188 | 48.98677362 | 21.73061439 | Superficial | SOX2              |
| KREMEN1   | 0.713062714 | 0.000401828 | 0.012455402 | 51.12077132 | 27.52790114 | Basal       | SOX2              |
| TMEM147   | 0.712669208 | 0.007423146 | 0.022959455 | 72.89427386 | 49.57190643 | Superficial | SOX2              |
| TOM1L1    | 0.712554624 | 0.004211401 | 0.016013117 | 23.61587939 | 8.747457616 | Superficial | SOX2              |
| TECPR2    | 0.712470979 | 9.30E-05    | 0.010489143 | 13.29861592 | 6.763670291 | Suprabasal  | SOX2              |
| NR6A1     | 0.711946773 | 0.002315114 | 0.016074975 | 14.65826514 | 7.063050314 | Suprabasal  | SOX2              |
| KHDRBS3   | 0.710487783 | 0.000635975 | 0.012925379 | 11.98724433 | 5.379939887 | Basal       | SOX2 + KLF5       |
| GTF3C2    | 0.70899392  | 0.002836074 | 0.012662188 | 27.90357716 | 11.75661752 | Superficial | SOX2              |
| SETD7     | 0.708207417 | 0.000635975 | 0.007274975 | 27.99014587 | 13.201659   | Superficial | SOX2              |
| PARD6G    | 0.708078019 | 0.004211401 | 0.016013117 | 44.41779238 | 18.59663141 | Superficial | SOX2              |
| LASP1     | 0.70727919  | 0.001526458 | 0.016792744 | 36.89944035 | 16.6859833  | Basal       | SOX2              |
| MIPEP     | 0.707166754 | 0.021001058 | 0.04834985  | 10.893853   | 3.702076167 | Superficial | SOX2 + KLF5, SOX2 |
| LEMD3     | 0.706801908 | 0.006166656 | 0.020290909 | 18.31855904 | 5.567001364 | Superficial | SOX2              |
| IER3      | 0.705746954 | 0.005105016 | 0.029792864 | 91.0662064  | 71.33517237 | Basal       | SOX2              |
| TM9SF3    | 0.705468786 | 0.000317696 | 0.007176147 | 75.11455963 | 44.74854753 | Superficial | SOX2              |
| TPST2     | 0.705368445 | 0.008904627 | 0.025990329 | 29.58094075 | 12.14561785 | Superficial | SOX2              |
| MAST4     | 0.70518553  | 0.015054848 | 0.038009884 | 60.88267442 | 33.03507244 | Superficial | SOX2              |
| PPP1R3D   | 0.705122846 | 0.001883197 | 0.010234018 | 23.83506292 | 9.135189693 | Superficial | SOX2              |
| SENP6     | 0.703318284 | 0.001526458 | 0.009387421 | 39.02975419 | 15.42974016 | Superficial | SOX2              |
| FAM83H    | 0.702860491 | 0.002315114 | 0.020052792 | 35.23918804 | 17.10164149 | Basal       | SOX2              |
| HIP1R     | 0.702694987 | 0.001526458 | 0.016792744 | 11.04972321 | 4.742867003 | Basal       | SOX2              |
| USP40     | 0.702333154 | 0.006166656 | 0.027303057 | 29.51910976 | 16.18770834 | Suprabasal  | SOX2              |
| PPARA     | 0.702123681 | 0.000153669 | 0.010489143 | 30.47842317 | 16.4040569  | Suprabasal  | SOX2              |
| NECTIN2   | 0.701897768 | 0.000250281 | 0.012455402 | 33.17085744 | 15.91725556 | Basal       | SOX2              |
| XPO7      | 0.701674727 | 0.012681065 | 0.033478436 | 17.37725907 | 6.268661514 | Superficial | SOX2              |
| MUS81     | 0.701670445 | 0.008904627 | 0.025990329 | 10.32278069 | 4.818304548 | Superficial | SOX2              |
| YRDC      | 0.69921272  | 0.003462059 | 0.014108599 | 21.51501832 | 8.558992813 | Superficial | SOX2              |
| BRD1      | 0.699059598 | 0.002315114 | 0.016074975 | 42.85777072 | 23.81696503 | Suprabasal  | SOX2              |
| SEMA4D    | 0.699049431 | 0.006166656 | 0.020290909 | 29.50955164 | 12.78839383 | Superficial | SOX2              |
| TRUB2     | 0.698692417 | 0.017811616 | 0.043066688 | 28.49174933 | 11.26687257 | Superficial | SOX2              |
| SEC63     | 0.698476952 | 0.012681065 | 0.033478436 | 36.80728048 | 14.45232384 | Superficial | SOX2              |
| ATP5F1D   | 0.698358337 | 0.007423146 | 0.022959455 | 82.5012794  | 63.14211755 | Superficial | SOX2              |
| AJUBA     | 0.697980755 | 0.015054848 | 0.048140298 | 24.81183555 | 12.03369669 | Suprabasal  | SOX2              |
| RWDD4     | 0.696875045 | 0.000401828 | 0.007176147 | 51.77094435 | 24.11983066 | Superficial | SOX2              |
| NACC1     | 0.696463116 | 0.000506425 | 0.012898798 | 20.19965077 | 9.054914034 | Basal       | SOX2              |
| FLNA      | 0.695574276 | 0.001883197 | 0.018415354 | 68.91808084 | 43.431091   | Basal       | SOX2              |
| SHROOM3   | 0.695335913 | 0.007423146 | 0.036548425 | 9.574191785 | 3.812745015 | Basal       | SOX2 + KLF5, SOX2 |
| SLTM      | 0.695313462 | 0.000506425 | 0.007178523 | 63.31126801 | 31.76210791 | Superficial | SOX2              |
| SCAPER    | 0.694072236 | 0.007423146 | 0.022959455 | 27.74667976 | 10.29388181 | Superficial | SOX2              |
| MON1B     | 0.693303248 | 0.006166656 | 0.020290909 | 27.61617344 | 11.3071686  | Superficial | SOX2              |
| NPC1      | 0.692962549 | 0.004211401 | 0.027185186 | 15.36013339 | 6.703777517 | Basal       | SOX2              |
| TAX1BP3   | 0.692447302 | 0.005105016 | 0.018023407 | 78.13399476 | 51.10089037 | Superficial | SOX2              |
| SGMS1     | 0.691297817 | 0.000635975 | 0.010733065 | 29.86271925 | 15.19705323 | Suprabasal  | SOX2 + KLF5       |
| SDC4      | 0.690969578 | 0.001883197 | 0.018415354 | 63.26780819 | 36.20162181 | Basal       | SOX2              |
| RING1     | 0.690902998 | 0.002836074 | 0.012662188 | 22.65387288 | 9.21827708  | Superficial | SOX2              |
| SUSD4     | 0.688905232 | 0.006166656 | 0.020290909 | 48.73984961 | 21.34803969 | Superficial | KLF5, SOX2        |
| POLR3D    | 0.687357327 | 0.003462059 | 0.014108599 | 20.8707821  | 7.43613414  | Superficial | SOX2              |
| PSMB4     | 0.685299892 | 0.001526458 | 0.009387421 | 58.61299947 | 27.96010638 | Superficial | SOX2              |
| HSPB1     | 0.684800626 | 0.012681065 | 0.033478436 | 98.45290194 | 93.43259814 | Superficial | SOX2              |
| EGFR      | 0.684370469 | 0.010644787 | 0.029507311 | 41.9502083  | 15.63246924 | Superficial | SOX2              |
| GTF3C1    | 0.683517925 | 0.004211401 | 0.016013117 | 60.9092851  | 33.78517881 | Superficial | SOX2              |
| ADGRL2    | 0.683192397 | 0.008904627 | 0.040392504 | 10.7417921  | 4.139408272 | Basal       | SOX2              |
| HDAC4     | 0.682742832 | 0.015054848 | 0.038009884 | 13.30421243 | 4.220842783 | Superficial | SOX2              |
| CEP55     | 0.682070144 | 0.001232925 | 0.015721789 | 33.14551567 | 19.35039483 | Basal       | SOX2              |
| ASH2L     | 0.681737225 | 0.001883197 | 0.010234018 | 23.09281134 | 8.409669845 | Superficial | SOX2              |
| USP37     | 0.681305269 | 0.000992312 | 0.01142308  | 15.85613317 | 8.095477402 | Suprabasal  | SOX2              |
| COBL      | 0.681239795 | 0.015054848 | 0.038009884 | 31.42195234 | 12.03903453 | Superficial | SOX2              |

|           |             |             |             |             |             |             |                   |
|-----------|-------------|-------------|-------------|-------------|-------------|-------------|-------------------|
| CDC42SE2  | 0.679917135 | 0.017811616 | 0.043066688 | 13.52002582 | 5.114852508 | Superficial | SOX2              |
| LSM14B    | 0.678316094 | 0.012681065 | 0.033478436 | 21.66978744 | 8.709179062 | Superficial | SOX2              |
| KLHL21    | 0.677983908 | 0.000401828 | 0.012455402 | 38.21633848 | 18.43710045 | Basal       | SOX2              |
| CASP7     | 0.677572835 | 0.004211401 | 0.021879278 | 32.86386227 | 16.70000183 | Suprabasal  | SOX2              |
| CCSAP     | 0.675473422 | 0.000250281 | 0.012455402 | 15.54470514 | 7.578541078 | Basal       | SOX2              |
| BRI3BP    | 0.675241931 | 0.017811616 | 0.043066688 | 27.70199565 | 10.31740369 | Superficial | SOX2              |
| ELP3      | 0.674993585 | 0.007423146 | 0.022959455 | 12.44484451 | 4.645805987 | Superficial | SOX2              |
| XPNPEP1   | 0.673875063 | 0.012681065 | 0.033478436 | 22.6153257  | 8.807703763 | Superficial | SOX2              |
| TSPAN31   | 0.673329211 | 0.007423146 | 0.022959455 | 32.32370625 | 14.57475959 | Superficial | SOX2              |
| GATAD1    | 0.672889383 | 9.30E-05    | 0.007176147 | 33.34992132 | 13.42729982 | Superficial | SOX2              |
| SBNO1     | 0.67149385  | 0.001232925 | 0.008679903 | 39.14640306 | 15.55429681 | Superficial | SOX2              |
| TTC23     | 0.670929937 | 0.004211401 | 0.016013117 | 11.357851   | 5.074134562 | Superficial | SOX2              |
| TBRG1     | 0.670360458 | 9.30E-05    | 0.007176147 | 35.02731125 | 14.25893381 | Superficial | SOX2              |
| MYO1D     | 0.670223138 | 0.001883197 | 0.010234018 | 48.98233231 | 23.24023778 | Superficial | SOX2              |
| AGAP3     | 0.669761063 | 0.001232925 | 0.008679903 | 41.32602591 | 18.75107029 | Superficial | SOX2              |
| DAXX      | 0.668789997 | 0.003462059 | 0.014108599 | 30.21577035 | 12.06403782 | Superficial | SOX2              |
| YKT6      | 0.668035629 | 0.001526458 | 0.016792744 | 26.64004822 | 12.79324033 | Basal       | SOX2              |
| CDK17     | 0.668015169 | 0.003462059 | 0.019729589 | 16.41360549 | 8.270330179 | Suprabasal  | SOX2              |
| MAL2      | 0.666971971 | 0.000992312 | 0.014320968 | 67.6656544  | 46.069602   | Basal       | SOX2, SOX2 + KLF5 |
| LGALS8    | 0.666036557 | 0.005105016 | 0.018023407 | 31.07031235 | 15.28461671 | Superficial | SOX2              |
| SLC44A2   | 0.665545253 | 0.007423146 | 0.022959455 | 61.18924802 | 32.86938981 | Superficial | SOX2              |
| ZBTB17    | 0.665396487 | 0.000795824 | 0.007615337 | 15.53672061 | 6.058259512 | Superficial | SOX2              |
| RABAC1    | 0.665008765 | 0.006166656 | 0.020290909 | 73.60564023 | 45.0711054  | Superficial | SOX2              |
| TNFRSF10B | 0.663928537 | 0.012681065 | 0.042921737 | 8.142564324 | 4.107895104 | Suprabasal  | SOX2              |
| PHF10     | 0.663225937 | 0.001232925 | 0.012246384 | 57.30647758 | 35.85848239 | Suprabasal  | SOX2              |
| SEC62     | 0.662496138 | 0.007423146 | 0.022959455 | 75.34348824 | 48.12215296 | Superficial | KLF5              |
| CDC25A    | 0.662365282 | 0.003462059 | 0.024854712 | 11.09681846 | 5.301737689 | Basal       | SOX2              |
| JOSD2     | 0.661599184 | 0.001883197 | 0.010234018 | 65.70995211 | 35.94558676 | Superficial | SOX2              |
| TAF6      | 0.661561026 | 0.001526458 | 0.009387421 | 16.25357545 | 6.858573155 | Superficial | SOX2              |
| PSMC2     | 0.661474033 | 0.008904627 | 0.025990329 | 48.13192169 | 20.69490945 | Superficial | SOX2              |
| INTS10    | 0.661149836 | 0.021001058 | 0.04834985  | 25.09640797 | 9.976829546 | Superficial | SOX2              |
| NUP50     | 0.660882124 | 0.010644787 | 0.038255467 | 53.95810736 | 32.51693783 | Suprabasal  | SOX2              |
| B3GNT2    | 0.659308899 | 0.015054848 | 0.038009884 | 48.76608833 | 22.08346533 | Superficial | SOX2 + KLF5, SOX2 |
| TEAD4     | 0.65922919  | 0.000795824 | 0.0136425   | 17.22245281 | 8.132829946 | Basal       | SOX2              |
| MIDN      | 0.658466962 | 0.010644787 | 0.029507311 | 76.35570508 | 51.43854435 | Superficial | SOX2              |
| IL13RA1   | 0.658415331 | 0.000506425 | 0.012898798 | 29.98096386 | 15.03877761 | Basal       | SOX2              |
| PRR14L    | 0.658376186 | 0.000506425 | 0.007178523 | 42.93223762 | 17.25211076 | Superficial | SOX2              |
| AARS2     | 0.658110216 | 0.010644787 | 0.029507311 | 10.38037111 | 3.661738738 | Superficial | SOX2              |
| LRP6      | 0.656261512 | 0.001883197 | 0.014679007 | 10.47197382 | 5.225409838 | Suprabasal  | SOX2              |
| SLC2A1    | 0.655554397 | 0.007423146 | 0.022959455 | 54.5759334  | 27.05487701 | Superficial | SOX2              |
| RBMXL1    | 0.655488128 | 0.021001058 | 0.04834985  | 21.07186616 | 8.056498063 | Superficial | SOX2              |
| ARHGFEF3  | 0.655422067 | 0.005105016 | 0.018023407 | 22.4596444  | 8.620999995 | Superficial | SOX2              |
| TPP2      | 0.654015025 | 0.004211401 | 0.016013117 | 29.24394806 | 12.0423832  | Superficial | SOX2              |
| AKAP11    | 0.653966626 | 0.017811616 | 0.043066688 | 21.36105886 | 7.919796639 | Superficial | SOX2              |
| MYO6      | 0.653027843 | 0.001526458 | 0.016792744 | 43.91930761 | 23.10721262 | Basal       | SOX2              |
| PHF6      | 0.652696533 | 0.005105016 | 0.018023407 | 25.04223587 | 10.11666217 | Superficial | SOX2              |
| MAFK      | 0.650414578 | 0.010644787 | 0.044687249 | 14.57536945 | 6.225943242 | Basal       | SOX2              |
| LLGL2     | 0.649878814 | 0.000401828 | 0.012455402 | 35.39044093 | 19.03596924 | Basal       | SOX2              |
| ZNF146    | 0.649786015 | 0.021001058 | 0.04834985  | 16.61304701 | 5.79814609  | Superficial | SOX2              |
| SLC9A3R1  | 0.649284456 | 0.000317696 | 0.012455402 | 70.56397011 | 47.30720979 | Basal       | SOX2              |
| COPB1     | 0.649171708 | 0.000635975 | 0.007274975 | 59.26939583 | 29.49107963 | Superficial | SOX2              |
| CXXC5     | 0.649012341 | 0.000635975 | 0.012925379 | 21.53093653 | 10.79801587 | Basal       | SOX2              |
| NFIA      | 0.64874555  | 0.002836074 | 0.012662188 | 53.7574233  | 26.49796931 | Superficial | SOX2              |
| SNAI2     | 0.648425085 | 0.015054848 | 0.048140298 | 12.43176037 | 6.318331755 | Suprabasal  | SOX2              |
| PIP4K2C   | 0.648192568 | 0.000401828 | 0.012455402 | 18.10247521 | 8.037186698 | Basal       | SOX2              |
| ILVBL     | 0.648089774 | 0.021001058 | 0.04834985  | 48.24008432 | 20.18812239 | Superficial | SOX2 + KLF5, SOX2 |
| PRKD2     | 0.647914132 | 0.000992312 | 0.014320968 | 23.08315078 | 10.53299073 | Basal       | SOX2              |
| GRHL1     | 0.647828984 | 0.002315114 | 0.020052792 | 17.11618921 | 8.766363269 | Basal       | SOX2              |
| CTR9      | 0.647808145 | 0.001883197 | 0.010234018 | 46.14068978 | 21.288081   | Superficial | SOX2              |
| MRPS5     | 0.647420793 | 0.000795824 | 0.007615337 | 49.35732999 | 23.18354163 | Superficial | SOX2              |
| GCH1      | 0.647126938 | 0.002836074 | 0.022562695 | 14.58129743 | 6.129531195 | Basal       | SOX2              |
| DNAJC2    | 0.646987291 | 0.021001058 | 0.04834985  | 25.67749226 | 9.788446426 | Superficial | SOX2              |
| CRTC2     | 0.646003988 | 0.004211401 | 0.027185186 | 14.0923151  | 5.928055588 | Basal       | SOX2              |
| BCL7C     | 0.64482131  | 0.007423146 | 0.022959455 | 43.10442673 | 18.3022768  | Superficial | SOX2              |
| KLF16     | 0.644492518 | 0.010644787 | 0.044687249 | 26.12696008 | 12.3925702  | Basal       | SOX2              |
| RWDD1     | 0.644476403 | 0.000153669 | 0.007176147 | 73.7233654  | 44.41614732 | Superficial | SOX2              |
| REXO1     | 0.644393123 | 0.000506425 | 0.010489143 | 21.29491628 | 11.63250148 | Suprabasal  | SOX2              |
| ALKBH6    | 0.643264176 | 0.015054848 | 0.038009884 | 8.987903727 | 4.148990879 | Superficial | SOX2              |
| TP53BP2   | 0.642931517 | 0.004211401 | 0.027185186 | 27.76129219 | 12.84269071 | Basal       | SOX2              |
| ETV6      | 0.642798297 | 0.001883197 | 0.014679007 | 37.04574122 | 20.39227825 | Suprabasal  | SOX2              |
| RPAIN     | 0.640544324 | 0.002836074 | 0.012662188 | 38.56017222 | 15.87384888 | Superficial | SOX2              |
| NPLOC4    | 0.638617174 | 0.000635975 | 0.012925379 | 29.33666899 | 14.58457346 | Basal       | SOX2              |
| CLN6      | 0.636965297 | 0.010644787 | 0.038255467 | 17.08599633 | 8.317263013 | Suprabasal  | SOX2              |
| GDAP1     | 0.635852454 | 0.007423146 | 0.030449933 | 10.90194566 | 5.623306424 | Suprabasal  | SOX2              |
| SEC23IP   | 0.634659651 | 0.007423146 | 0.022959455 | 22.1392895  | 8.593233906 | Superficial | SOX2              |
| CDR2      | 0.634532008 | 0.001883197 | 0.018415354 | 10.22859731 | 4.830933407 | Basal       | SOX2              |
| B3GNT5    | 0.634212695 | 0.010644787 | 0.029507311 | 51.9158176  | 27.30802555 | Superficial | SOX2              |
| SPPL2A    | 0.633852245 | 0.004211401 | 0.016013117 | 43.33985558 | 18.32567339 | Superficial | SOX2              |
| GSK3B     | 0.633816567 | 0.000506425 | 0.007178523 | 40.39832657 | 17.8837765  | Superficial | SOX2              |
| PUS7L     | 0.633488025 | 0.002836074 | 0.012662188 | 29.01936478 | 12.46560073 | Superficial | SOX2              |



|          |             |             |             |             |             |             |                   |
|----------|-------------|-------------|-------------|-------------|-------------|-------------|-------------------|
| LINS1    | 0.631907647 | 0.004211401 | 0.016013117 | 16.64845294 | 5.985100765 | Superficial | SOX2              |
| APPL2    | 0.631652725 | 0.008904627 | 0.034252903 | 42.9805544  | 24.81626319 | Suprabasal  | SOX2              |
| TACSTD2  | 0.631602355 | 0.000795824 | 0.0136425   | 98.55844464 | 89.75262691 | Basal       | SOX2, KLF5        |
| RALB     | 0.631027731 | 0.001526458 | 0.009387421 | 66.92308937 | 38.04879059 | Superficial | SOX2              |
| NUS1     | 0.630748992 | 0.001526458 | 0.009387421 | 26.18152527 | 10.93146073 | Superficial | SOX2              |
| PLEKHG6  | 0.630732547 | 0.010644787 | 0.044687249 | 10.86442646 | 4.748218178 | Basal       | SOX2              |
| CTDP1    | 0.630691088 | 0.001883197 | 0.018415354 | 12.37768396 | 5.680913332 | Basal       | SOX2              |
| HCFC1    | 0.62946212  | 0.010644787 | 0.038255467 | 25.31814262 | 13.62847611 | Suprabasal  | SOX2              |
| TPBG     | 0.628615415 | 0.008904627 | 0.025990329 | 12.37015338 | 4.658716986 | Superficial | SOX2              |
| PSMD12   | 0.628161006 | 0.001883197 | 0.010234018 | 60.76021059 | 32.83275084 | Superficial | SOX2              |
| VPS53    | 0.627854593 | 0.005105016 | 0.018023407 | 31.16917285 | 11.9110685  | Superficial | SOX2              |
| PHRF1    | 0.627348754 | 0.000635975 | 0.010733065 | 28.08723807 | 15.10110419 | Suprabasal  | SOX2              |
| WDFY2    | 0.627045805 | 0.001232925 | 0.008679903 | 37.26846613 | 15.89920156 | Superficial | SOX2              |
| DDX54    | 0.626076966 | 0.015054848 | 0.038009884 | 27.37361913 | 9.95378725  | Superficial | SOX2              |
| GNA15    | 0.625857909 | 0.001526458 | 0.016792744 | 34.12656535 | 17.38627815 | Basal       | SOX2              |
| PACS1    | 0.624993882 | 0.000635975 | 0.012925379 | 32.06671086 | 15.46331705 | Basal       | SOX2 + KLF5       |
| KIFAP3   | 0.624614681 | 0.010644787 | 0.029507311 | 24.60834527 | 9.675495534 | Superficial | SOX2              |
| TMBIM1   | 0.624550933 | 0.001883197 | 0.018415354 | 47.7802457  | 26.01769816 | Basal       | SOX2              |
| RPAP3    | 0.62447027  | 0.021001058 | 0.04834985  | 22.6548561  | 8.653170341 | Superficial | SOX2              |
| PKIA     | 0.624035874 | 0.003462059 | 0.019729589 | 17.9108499  | 9.009216803 | Suprabasal  | SOX2              |
| TTL4     | 0.622221452 | 0.010644787 | 0.038255467 | 6.490223942 | 3.11242573  | Suprabasal  | SOX2              |
| TMEM51   | 0.621004095 | 0.000506425 | 0.012898798 | 13.93565344 | 6.630753718 | Basal       | SOX2              |
| CAPN15   | 0.620456443 | 0.008904627 | 0.040392504 | 15.5871956  | 6.756952252 | Basal       | SOX2              |
| TTC39C   | 0.619828384 | 0.017811616 | 0.043066688 | 15.32945915 | 7.118245549 | Superficial | SOX2 + KLF5       |
| LMNB1    | 0.619073998 | 0.001526458 | 0.016792744 | 46.9676545  | 27.82506765 | Basal       | SOX2              |
| NDST1    | 0.618998721 | 0.001232925 | 0.015721789 | 16.85826686 | 7.854229583 | Basal       | SOX2              |
| HS6ST1   | 0.618991894 | 0.002315114 | 0.016074975 | 26.59241943 | 14.78961537 | Suprabasal  | SOX2 + KLF5, SOX2 |
| NSD2     | 0.618825078 | 0.002836074 | 0.022562695 | 34.05755097 | 18.57604866 | Basal       | SOX2              |
| NDUFA4   | 0.617621009 | 0.007423146 | 0.022959455 | 87.20515658 | 75.61760295 | Superficial | SOX2 + KLF5       |
| TTL      | 0.616625565 | 0.015054848 | 0.038009884 | 9.39597726  | 3.866933503 | Superficial | SOX2              |
| SCAF1    | 0.616556744 | 0.000401828 | 0.012455402 | 26.69961579 | 12.46298288 | Basal       | SOX2              |
| LMNA     | 0.616183225 | 0.002315114 | 0.011381143 | 80.38720529 | 57.80369745 | Superficial | SOX2, SOX2 + KLF5 |
| PARL     | 0.615975765 | 0.006166656 | 0.020290909 | 34.42614282 | 14.25106949 | Superficial | SOX2              |
| CBX4     | 0.614355706 | 0.006166656 | 0.032981404 | 24.91951176 | 12.4972595  | Basal       | SOX2              |
| BRWD3    | 0.613658138 | 0.008904627 | 0.025990329 | 34.96651289 | 13.44089262 | Superficial | SOX2              |
| RIN2     | 0.613619312 | 0.003462059 | 0.019729589 | 48.89795167 | 27.70980442 | Suprabasal  | SOX2 + KLF5       |
| AXIN1    | 0.613476955 | 9.30E-05    | 0.010489143 | 14.62137054 | 7.716630072 | Suprabasal  | SOX2              |
| JUN      | 0.612848095 | 0.010644787 | 0.029507311 | 77.53502385 | 50.74961947 | Superficial | SOX2, SOX2 + KLF5 |
| MTOR     | 0.612490458 | 0.000119764 | 0.012455402 | 22.77006362 | 11.23841573 | Basal       | SOX2              |
| PTK7     | 0.612100471 | 0.007423146 | 0.030449933 | 17.046313   | 8.949674957 | Suprabasal  | SOX2              |
| HNRNPU   | 0.611217861 | 0.005105016 | 0.018023407 | 71.0978732  | 39.92723052 | Superficial | SOX2              |
| ZBTB7A   | 0.611118396 | 0.000635975 | 0.012925379 | 72.61060878 | 45.60543903 | Basal       | SOX2              |
| LMNB2    | 0.609316573 | 0.001526458 | 0.016792744 | 41.27761467 | 23.83188838 | Basal       | SOX2              |
| STAM     | 0.608060929 | 0.015054848 | 0.038009884 | 33.32040064 | 13.39469361 | Superficial | SOX2              |
| PSPC1    | 0.607965342 | 0.006166656 | 0.020290909 | 26.2929197  | 9.608926425 | Superficial | SOX2              |
| UBA2     | 0.607402761 | 0.004211401 | 0.016013117 | 38.70500567 | 16.10997115 | Superficial | SOX2              |
| REEP5    | 0.606826435 | 0.001232925 | 0.008679903 | 66.34652048 | 37.75642278 | Superficial | SOX2              |
| ST3GAL1  | 0.606535423 | 0.017811616 | 0.043066688 | 24.29650378 | 9.987123775 | Superficial | SOX2              |
| USP47    | 0.60533587  | 0.002836074 | 0.012662188 | 45.99539819 | 18.77180015 | Superficial | SOX2              |
| DICER1   | 0.605163275 | 0.007423146 | 0.022959455 | 54.5955466  | 26.41130541 | Superficial | SOX2              |
| STIL     | 0.605032204 | 0.012681065 | 0.049425568 | 17.41909562 | 9.114647452 | Basal       | SOX2              |
| MEX3C    | 0.604743821 | 0.002836074 | 0.0176927   | 19.5438782  | 10.34685587 | Suprabasal  | SOX2              |
| EBNA1BP2 | 0.604051292 | 0.008904627 | 0.025990329 | 40.02189028 | 17.49491332 | Superficial | SOX2              |
| PKMYT1   | 0.603866657 | 0.005105016 | 0.029792864 | 26.85050168 | 15.06546933 | Basal       | SOX2              |
| DNTTIP2  | 0.60369074  | 0.007423146 | 0.022959455 | 38.13670698 | 15.82482952 | Superficial | SOX2              |
| RABEP1   | 0.603633062 | 0.002315114 | 0.011381143 | 24.08573739 | 9.127485293 | Superficial | SOX2              |
| PSMB2    | 0.603597338 | 0.007423146 | 0.022959455 | 59.36204562 | 29.71514402 | Superficial | SOX2              |
| ATP11A   | 0.602712245 | 0.007423146 | 0.036548425 | 16.71750869 | 7.367259194 | Basal       | SOX2              |
| HSD17B1  | 0.602155405 | 0.004211401 | 0.016013117 | 24.56695092 | 11.3566743  | Superficial | SOX2              |
| DDX1     | 0.601574847 | 0.008904627 | 0.025990329 | 44.5230924  | 18.97647767 | Superficial | SOX2              |
| CCDC43   | 0.601502898 | 0.012681065 | 0.033478436 | 28.05317601 | 11.88733009 | Superficial | SOX2              |
| F11R     | 0.601020271 | 0.001526458 | 0.016792744 | 63.0512991  | 36.17533407 | Basal       | SOX2              |
| RRM2     | 0.600475257 | 0.010644787 | 0.044687249 | 39.28345524 | 25.80666442 | Basal       | SOX2              |
| ZNF367   | 0.600262693 | 0.000317696 | 0.012455402 | 15.13660037 | 7.800981888 | Basal       | SOX2              |
| IMP3     | 0.60004906  | 0.006166656 | 0.020290909 | 64.98953505 | 33.25115252 | Superficial | SOX2              |
| FUT2     | 0.599158969 | 0.010644787 | 0.044687249 | 11.62944402 | 5.532194569 | Basal       | SOX2              |
| DAAM1    | 0.59915439  | 0.000992312 | 0.008042817 | 76.38738117 | 49.14984258 | Superficial | SOX2              |
| SYPL1    | 0.598514626 | 0.008904627 | 0.025990329 | 76.69146901 | 50.8731247  | Superficial | SOX2              |
| PDIA6    | 0.598308542 | 0.021001058 | 0.04834985  | 67.6873498  | 34.83698894 | Superficial | SOX2              |
| FRMD8    | 0.598257819 | 0.003462059 | 0.024854712 | 21.81927065 | 10.05410338 | Basal       | SOX2              |
| ZNF286A  | 0.598000696 | 0.002315114 | 0.016074975 | 10.4340277  | 5.156451451 | Suprabasal  | SOX2              |
| DDX5     | 0.596734835 | 0.002315114 | 0.011381143 | 80.40466764 | 53.89941309 | Superficial | SOX2              |
| BRD3     | 0.596508411 | 0.001883197 | 0.014679007 | 26.70160161 | 14.51964849 | Suprabasal  | SOX2              |
| BACE2    | 0.594567261 | 0.005105016 | 0.029792864 | 44.63772598 | 24.73032218 | Basal       | SOX2 + KLF5       |
| TNIP1    | 0.594212161 | 0.000635975 | 0.012925379 | 39.40134427 | 20.60852556 | Basal       | SOX2 + KLF5       |
| PALB2    | 0.593794395 | 0.002836074 | 0.0176927   | 16.12236284 | 8.209849083 | Suprabasal  | SOX2              |
| KLHL2    | 0.59270357  | 0.000795824 | 0.0136425   | 12.37145745 | 5.614726525 | Basal       | SOX2              |
| KMT5A    | 0.59128364  | 0.006166656 | 0.020290909 | 65.0270615  | 35.7780276  | Superficial | SOX2              |
| FBXO45   | 0.588969119 | 0.017811616 | 0.043066688 | 19.16361532 | 8.241544775 | Superficial | SOX2              |
| S100BPB  | 0.588772465 | 0.003462059 | 0.019729589 | 15.51095779 | 7.592054591 | Suprabasal  | SOX2              |

|           |             |             |             |             |             |             |                   |
|-----------|-------------|-------------|-------------|-------------|-------------|-------------|-------------------|
| DDB1      | 0.588606432 | 0.021001058 | 0.04834985  | 36.33819273 | 15.45625643 | Superficial | SOX2              |
| CCDC25    | 0.587148492 | 0.021001058 | 0.04834985  | 47.68870804 | 21.05364584 | Superficial | SOX2              |
| DGKZ      | 0.587067796 | 0.002836074 | 0.0176927   | 30.55586994 | 17.20076353 | Suprabasal  | SOX2              |
| KLF6      | 0.586976239 | 0.001526458 | 0.009387421 | 83.35824169 | 60.69685533 | Superficial | SOX2              |
| CEBPD     | 0.585393294 | 0.004211401 | 0.021879278 | 85.52303744 | 65.28861982 | Suprabasal  | SOX2              |
| ANKRD9    | 0.584905296 | 0.005105016 | 0.029792864 | 35.83613769 | 18.98583165 | Basal       | SOX2              |
| SPAST     | 0.584604471 | 0.017811616 | 0.043066688 | 24.12051452 | 10.02080618 | Superficial | SOX2              |
| NT5C3B    | 0.584186592 | 0.021001058 | 0.04834985  | 18.38476757 | 7.533026674 | Superficial | SOX2              |
| CDC123    | 0.583905789 | 0.010644787 | 0.029507311 | 42.59845803 | 18.30831463 | Superficial | SOX2              |
| ADAM10    | 0.583902874 | 0.012681065 | 0.049425568 | 46.92135914 | 25.26441665 | Basal       | SOX2              |
| TBCB      | 0.583533491 | 0.005105016 | 0.018023407 | 57.99479646 | 30.40976353 | Superficial | SOX2              |
| TTC9      | 0.583380961 | 0.012681065 | 0.049425568 | 20.57073371 | 10.38099781 | Basal       | SOX2              |
| HMGES     | 0.583210817 | 0.002836074 | 0.012662188 | 35.52203737 | 16.2197152  | Superficial | SOX2              |
| PEX11B    | 0.583019182 | 0.015054848 | 0.038009884 | 23.01143191 | 9.454768488 | Superficial | SOX2              |
| RABGAP1   | 0.582347637 | 0.012681065 | 0.033478436 | 52.92135628 | 25.18508645 | Superficial | SOX2              |
| PAIP2B    | 0.580739387 | 0.021001058 | 0.04834985  | 44.41576247 | 20.3766825  | Superficial | SOX2 + KLF5, SOX2 |
| CHD2      | 0.580357251 | 0.000795824 | 0.010838271 | 54.26481291 | 33.87147191 | Suprabasal  | SOX2              |
| MYO1C     | 0.579266015 | 0.004211401 | 0.027185186 | 50.3517943  | 28.31410955 | Basal       | SOX2              |
| ACOT7     | 0.579261072 | 0.017811616 | 0.043066688 | 21.06320546 | 8.444328094 | Superficial | SOX2              |
| ORC1      | 0.578777928 | 0.006166656 | 0.032981404 | 13.08983666 | 6.574679554 | Basal       | SOX2              |
| GNL3L     | 0.577846754 | 0.012681065 | 0.042921737 | 27.7323956  | 15.59629515 | Suprabasal  | SOX2              |
| MICALL2   | 0.577590978 | 0.000795824 | 0.0136425   | 24.54449984 | 12.34438818 | Basal       | SOX2              |
| CDC5L     | 0.577367904 | 0.010644787 | 0.029507311 | 46.85050398 | 20.28831503 | Superficial | SOX2              |
| ZNF503    | 0.575857212 | 0.010644787 | 0.029507311 | 27.20047124 | 12.22366228 | Superficial | SOX2              |
| MYO5B     | 0.575610396 | 0.001883197 | 0.018415354 | 12.41517352 | 5.794956349 | Basal       | SOX2              |
| SHPK      | 0.574491073 | 0.008904627 | 0.025990329 | 9.471988201 | 3.753573693 | Superficial | SOX2              |
| BZW2      | 0.57447235  | 0.017811616 | 0.043066688 | 40.84455152 | 16.52980784 | Superficial | SOX2              |
| SPPL3     | 0.573634654 | 0.003462059 | 0.014108599 | 47.28374064 | 22.03450031 | Superficial | SOX2 + KLF5, SOX2 |
| CUL3      | 0.573016092 | 0.000401828 | 0.012455402 | 59.14956542 | 35.1104698  | Basal       | SOX2              |
| RTN4R     | 0.573006335 | 0.010644787 | 0.044687249 | 10.07206455 | 4.963485412 | Basal       | SOX2              |
| KATNA1    | 0.572676717 | 0.000250281 | 0.007176147 | 25.18839815 | 11.23271671 | Superficial | SOX2              |
| CHFR      | 0.572376262 | 0.005105016 | 0.029792864 | 15.92621312 | 7.523139889 | Basal       | SOX2              |
| ABCB10    | 0.571942293 | 0.004211401 | 0.027185186 | 15.32551643 | 7.592237018 | Basal       | SOX2              |
| TSTD2     | 0.571866552 | 0.017811616 | 0.043066688 | 10.47451837 | 4.636528888 | Superficial | SOX2              |
| STK11     | 0.570912857 | 0.004211401 | 0.027185186 | 39.54364401 | 21.58271748 | Basal       | SOX2              |
| CNOT6     | 0.570895163 | 0.010644787 | 0.029507311 | 27.29005571 | 10.21974486 | Superficial | SOX2              |
| SMARCC1   | 0.570863674 | 0.010644787 | 0.029507311 | 41.37989477 | 19.06307239 | Superficial | SOX2              |
| STRBP     | 0.570780625 | 0.002315114 | 0.011381143 | 59.67198685 | 30.93992246 | Superficial | SOX2              |
| ATXN7L3   | 0.569461391 | 0.000635975 | 0.012925379 | 22.89580349 | 10.95539312 | Basal       | SOX2              |
| MAP3K1    | 0.569441306 | 0.015054848 | 0.038009884 | 45.13891115 | 19.58848491 | Superficial | SOX2              |
| KLF10     | 0.568633025 | 0.008904627 | 0.034252903 | 36.85873202 | 21.70693085 | Suprabasal  | SOX2              |
| MYLIP     | 0.568414442 | 0.001232925 | 0.012246384 | 41.7823653  | 24.48742287 | Suprabasal  | SOX2              |
| PDXK      | 0.567977931 | 0.000992312 | 0.014320968 | 57.7535651  | 33.79410889 | Basal       | SOX2              |
| ZMYM1     | 0.56738358  | 0.000506425 | 0.010489143 | 25.27509558 | 13.49142163 | Suprabasal  | SOX2              |
| UBLCP1    | 0.566918222 | 0.004211401 | 0.016013117 | 39.65019314 | 17.19327528 | Superficial | SOX2              |
| MYBBP1A   | 0.56688332  | 0.003462059 | 0.024854712 | 22.06185652 | 10.56027538 | Basal       | SOX2              |
| FBRSL1    | 0.566139832 | 0.003462059 | 0.024854712 | 23.29403516 | 10.99696911 | Basal       | SOX2              |
| OPA1      | 0.565910951 | 0.015054848 | 0.038009884 | 40.1444524  | 16.26258589 | Superficial | SOX2              |
| MCM4      | 0.565800435 | 0.003462059 | 0.024854712 | 57.40336068 | 35.47954179 | Basal       | SOX2              |
| PLAGL2    | 0.565398167 | 0.008904627 | 0.040392504 | 19.64283433 | 9.125336889 | Basal       | SOX2              |
| TNFAIP8L1 | 0.564537093 | 0.007423146 | 0.036548425 | 18.10017498 | 10.5457503  | Basal       | SOX2              |
| LARS2     | 0.563555094 | 0.006166656 | 0.032981404 | 12.02626978 | 5.845680963 | Basal       | SOX2              |
| ALYREF    | 0.563301502 | 0.021001058 | 0.04834985  | 41.48176973 | 18.83980691 | Superficial | SOX2              |
| LRP10     | 0.563132611 | 0.000153669 | 0.012455402 | 60.99423501 | 37.67474411 | Basal       | SOX2              |
| SLC12A2   | 0.562474231 | 0.003462059 | 0.019729589 | 10.77812199 | 5.408597712 | Suprabasal  | SOX2              |
| DDR1      | 0.562373943 | 0.000795824 | 0.010838271 | 68.0993919  | 45.28934753 | Suprabasal  | SOX2              |
| CNOT3     | 0.561689481 | 0.000992312 | 0.01142308  | 28.71801011 | 17.27564704 | Suprabasal  | SOX2              |
| NUP188    | 0.561464204 | 0.002836074 | 0.022562695 | 30.2577921  | 15.1332891  | Basal       | SOX2              |
| RGP1      | 0.560435385 | 0.003462059 | 0.019729589 | 13.42346619 | 7.532436965 | Suprabasal  | SOX2              |
| ZNF768    | 0.559358288 | 0.001883197 | 0.014679007 | 12.46714038 | 6.490597492 | Suprabasal  | SOX2              |
| INTS1     | 0.55918513  | 0.006166656 | 0.032981404 | 30.31020082 | 16.19867459 | Basal       | SOX2              |
| BAP1      | 0.558420415 | 0.015054848 | 0.048140298 | 30.97902085 | 18.53894319 | Suprabasal  | SOX2              |
| USP25     | 0.557295031 | 0.000196466 | 0.012455402 | 29.0726618  | 14.66598057 | Basal       | SOX2              |
| GUF1      | 0.5567566   | 0.007423146 | 0.022959455 | 23.83669527 | 8.827857569 | Superficial | SOX2              |
| FAF2      | 0.556593152 | 0.001526458 | 0.009387421 | 36.29272897 | 14.54763219 | Superficial | SOX2              |
| EGFL6     | 0.556147345 | 0.006166656 | 0.027303057 | 33.72800327 | 18.89160666 | Suprabasal  | SOX2              |
| ATP13A2   | 0.555814137 | 0.000401828 | 0.012455402 | 17.53077521 | 9.000378518 | Basal       | SOX2              |
| RAB27B    | 0.555355604 | 0.002315114 | 0.011381143 | 59.79240219 | 31.73912783 | Superficial | SOX2, SOX2 + KLF5 |
| XPO5      | 0.554728734 | 0.015054848 | 0.038009884 | 12.41895402 | 4.453709417 | Superficial | SOX2              |
| TARBP1    | 0.553824775 | 0.003462059 | 0.019729589 | 19.92559264 | 11.6501114  | Suprabasal  | SOX2              |
| RRP12     | 0.553439503 | 0.001232925 | 0.015721789 | 12.13356295 | 5.922857206 | Basal       | SOX2 + KLF5, SOX2 |
| MCM2      | 0.553145931 | 0.008904627 | 0.040392504 | 26.87734726 | 14.5281405  | Basal       | SOX2              |
| TES       | 0.551859738 | 0.006166656 | 0.020290909 | 40.8340672  | 18.31834669 | Superficial | SOX2              |
| SLC25A10  | 0.551805139 | 0.010644787 | 0.044687249 | 38.67628151 | 21.72036806 | Basal       | SOX2 + KLF5, SOX2 |
| TMEM33    | 0.550352753 | 0.003462059 | 0.014108599 | 43.15784579 | 21.71450811 | Superficial | SOX2              |
| ECD       | 0.549038951 | 0.017811616 | 0.043066688 | 19.31874557 | 9.430919656 | Superficial | SOX2              |
| TBCD      | 0.548662953 | 0.003462059 | 0.024854712 | 27.13218841 | 14.47561619 | Basal       | SOX2              |
| JUP       | 0.54864085  | 0.000795824 | 0.0136425   | 86.39745245 | 66.15826609 | Basal       | SOX2, SOX2 + KLF5 |
| FAM102A   | 0.547362144 | 0.000635975 | 0.012925379 | 31.91566041 | 16.70012751 | Basal       | SOX2              |
| TRIP12    | 0.545203053 | 0.007423146 | 0.036548425 | 49.7497347  | 27.85387132 | Basal       | SOX2              |

|           |             |             |             |             |             |             |                         |
|-----------|-------------|-------------|-------------|-------------|-------------|-------------|-------------------------|
| ATP6V0A2  | 0.544362438 | 0.015054848 | 0.048140298 | 13.39822462 | 7.244591033 | Suprabasal  | SOX2                    |
| SYTL1     | 0.544315471 | 0.021001058 | 0.04834985  | 73.97048156 | 45.83813186 | Superficial | SOX2                    |
| HNRNPM    | 0.543720788 | 0.012681065 | 0.033478436 | 63.11040245 | 32.54516521 | Superficial | SOX2                    |
| ELF3      | 0.54136574  | 0.012681065 | 0.049425568 | 56.54352937 | 38.3781648  | Basal       | SOX2, KLF5, SOX2 + KLF5 |
| ERBB3     | 0.541330501 | 0.000795824 | 0.0136425   | 42.43033253 | 24.05521405 | Basal       | SOX2                    |
| KLC2      | 0.54054988  | 0.004211401 | 0.021879278 | 11.36024429 | 6.507917261 | Suprabasal  | SOX2                    |
| CBFB      | 0.539190443 | 0.001526458 | 0.016792744 | 30.44720682 | 14.98475264 | Basal       | SOX2                    |
| MICALL1   | 0.53903016  | 0.001526458 | 0.016792744 | 26.62948582 | 13.60714347 | Basal       | SOX2, KLF5              |
| ATP13A3   | 0.538620588 | 0.006166656 | 0.032981404 | 33.65402979 | 16.85817377 | Basal       | SOX2                    |
| BMP2K     | 0.5381026   | 0.010644787 | 0.029507311 | 30.86873589 | 12.87664539 | Superficial | SOX2                    |
| IRAK1     | 0.538095381 | 0.002315114 | 0.020052792 | 38.96317903 | 21.4747565  | Basal       | SOX2                    |
| TM7SF3    | 0.537123275 | 0.003462059 | 0.014108599 | 39.04521885 | 18.4880171  | Superficial | SOX2                    |
| PSMB3     | 0.535779065 | 0.002315114 | 0.011381143 | 73.69962452 | 44.93950696 | Superficial | SOX2                    |
| CRYBG2    | 0.535424694 | 0.003462059 | 0.024854712 | 13.47297953 | 6.898201952 | Basal       | KLF5                    |
| SOD2      | 0.535167327 | 0.008904627 | 0.040392504 | 74.53929203 | 49.21507383 | Basal       | SOX2                    |
| SNN       | 0.534874669 | 0.000401828 | 0.012455402 | 12.75407637 | 6.481786994 | Basal       | SOX2                    |
| CWC27     | 0.534707173 | 0.004211401 | 0.016013117 | 26.12936858 | 11.5878165  | Superficial | SOX2                    |
| ARJ       | 0.533709462 | 0.012681065 | 0.042921737 | 7.698190606 | 3.763901651 | Suprabasal  | SOX2                    |
| NUDT3     | 0.533337388 | 0.012681065 | 0.033478436 | 25.04808303 | 9.578946621 | Superficial | SOX2                    |
| ANKRD52   | 0.53277344  | 0.004211401 | 0.021879278 | 10.11138008 | 5.40810124  | Suprabasal  | SOX2                    |
| S100A11   | 0.532661764 | 0.004211401 | 0.027185186 | 99.86119542 | 98.82193269 | Basal       | SOX2                    |
| CNOT11    | 0.5325964   | 0.002315114 | 0.011381143 | 38.1402724  | 17.44697014 | Superficial | SOX2                    |
| CUL2      | 0.532346494 | 0.012681065 | 0.033478436 | 31.02835804 | 13.27069577 | Superficial | SOX2                    |
| EIF2S1    | 0.532152229 | 0.006166656 | 0.020290909 | 47.45304071 | 21.71808627 | Superficial | SOX2                    |
| ERCC6     | 0.531874264 | 0.002836074 | 0.0176927   | 24.24188941 | 14.03843851 | Suprabasal  | SOX2                    |
| NKAP      | 0.531109713 | 0.002315114 | 0.011381143 | 36.56583353 | 15.56036051 | Superficial | SOX2                    |
| ITPKB     | 0.530289527 | 0.004211401 | 0.021879278 | 8.021108444 | 4.822059891 | Suprabasal  | SOX2                    |
| TGOLN2    | 0.529440537 | 0.006166656 | 0.020290909 | 45.81425303 | 23.33559263 | Superficial | SOX2                    |
| TRIP10    | 0.527179997 | 0.000795824 | 0.0136425   | 26.74185502 | 13.52408073 | Basal       | SOX2 + KLF5             |
| WAPL      | 0.527163417 | 0.017811616 | 0.043066688 | 45.72441968 | 20.94921423 | Superficial | SOX2                    |
| ANLN      | 0.526520833 | 0.008904627 | 0.040392504 | 36.530004   | 22.85027331 | Basal       | SOX2                    |
| ANXA1     | 0.526354665 | 0.010644787 | 0.044687249 | 99.04728296 | 97.15687469 | Basal       | SOX2 + KLF5, SOX2       |
| CTNNA1    | 0.525896828 | 0.002315114 | 0.020052792 | 77.18314236 | 53.75795767 | Basal       | SOX2                    |
| NXN       | 0.52540313  | 0.012681065 | 0.042921737 | 43.88886404 | 24.88549412 | Suprabasal  | SOX2                    |
| KLHL8     | 0.523147525 | 0.010644787 | 0.038255467 | 15.65540226 | 8.980403041 | Suprabasal  | SOX2 + KLF5             |
| JAG1      | 0.522042648 | 0.002836074 | 0.022562695 | 60.931408   | 37.7428955  | Basal       | SOX2, SOX2 + KLF5       |
| CHD7      | 0.521984316 | 0.007423146 | 0.022959455 | 33.38086425 | 14.66102246 | Superficial | SOX2                    |
| RAD23A    | 0.521616714 | 0.010644787 | 0.029507311 | 49.6591592  | 21.30608421 | Superficial | SOX2                    |
| ACBD3     | 0.521467682 | 0.001526458 | 0.013290882 | 80.56801461 | 59.80486031 | Suprabasal  | SOX2                    |
| NUMA1     | 0.521181726 | 0.005105016 | 0.029792864 | 53.1244713  | 30.20781378 | Basal       | SOX2                    |
| ATRIP     | 0.520900406 | 0.002315114 | 0.020052792 | 14.17842467 | 7.484290553 | Basal       | SOX2                    |
| NFATC2IP  | 0.52049701  | 0.012681065 | 0.033478436 | 26.51865935 | 10.89065796 | Superficial | SOX2                    |
| GRSF1     | 0.519672061 | 0.000506425 | 0.007178523 | 47.21126079 | 22.01541314 | Superficial | SOX2                    |
| ARID2     | 0.518042147 | 0.015054848 | 0.038009884 | 26.3492912  | 11.03379219 | Superficial | SOX2                    |
| CUEDC1    | 0.517765462 | 0.002315114 | 0.020052792 | 16.95961156 | 8.258408028 | Basal       | SOX2                    |
| KLF3      | 0.517679593 | 0.007423146 | 0.030449933 | 83.92570547 | 65.51864617 | Suprabasal  | SOX2 + KLF5             |
| MTRF1L    | 0.51714331  | 0.010644787 | 0.029507311 | 27.58706894 | 13.04922908 | Superficial | SOX2                    |
| ELP4      | 0.516927801 | 0.010644787 | 0.029507311 | 14.78220504 | 6.588135394 | Superficial | SOX2                    |
| CDC42EP5  | 0.515557091 | 0.008904627 | 0.040392504 | 51.64386602 | 28.76256482 | Basal       | SOX2                    |
| RFWD3     | 0.515309713 | 0.004211401 | 0.021879278 | 11.70454255 | 6.736320405 | Suprabasal  | SOX2                    |
| AQR       | 0.514022203 | 0.015054848 | 0.038009884 | 31.19422048 | 12.82419177 | Superficial | SOX2                    |
| SDE2      | 0.512741406 | 0.006166656 | 0.027303057 | 23.7675373  | 12.72793341 | Suprabasal  | SOX2                    |
| PNKP      | 0.511632792 | 0.008904627 | 0.025990329 | 23.42211961 | 10.10092883 | Superficial | SOX2                    |
| UPF1      | 0.511286401 | 0.003462059 | 0.024854712 | 37.07981162 | 19.42343512 | Basal       | SOX2                    |
| PTK6      | 0.510135249 | 0.012681065 | 0.049425568 | 19.27144799 | 9.872191405 | Basal       | SOX2                    |
| USP6NL    | 0.509593969 | 0.008904627 | 0.040392504 | 17.68897498 | 8.50089171  | Basal       | SOX2                    |
| MPZL1     | 0.508728407 | 0.008904627 | 0.025990329 | 43.3369847  | 22.76864965 | Superficial | SOX2 + KLF5, SOX2       |
| BUB3      | 0.508714222 | 0.007423146 | 0.022959455 | 45.69659583 | 21.03149772 | Superficial | SOX2                    |
| PURA      | 0.507065933 | 0.000401828 | 0.007176147 | 44.46355188 | 21.71574662 | Superficial | SOX2                    |
| FRS2      | 0.506244634 | 0.021001058 | 0.04834985  | 18.7799487  | 7.366259053 | Superficial | SOX2                    |
| FRMD6     | 0.505534122 | 0.002315114 | 0.011381143 | 72.31695849 | 41.61355295 | Superficial | SOX2                    |
| CCND1     | 0.505169811 | 0.021001058 | 0.04834985  | 55.07589057 | 29.22761701 | Superficial | SOX2                    |
| GNB2      | 0.50420714  | 0.005105016 | 0.029792864 | 78.3157134  | 55.61594237 | Basal       | SOX2                    |
| SH2B1     | 0.503568083 | 0.015054848 | 0.048140298 | 17.07369447 | 9.923961829 | Suprabasal  | SOX2                    |
| ASPH      | 0.501403718 | 0.004211401 | 0.021879278 | 70.82171402 | 48.84771551 | Suprabasal  | SOX2                    |
| PPP6R1    | 0.5009654   | 0.001232925 | 0.015721789 | 29.47347937 | 15.12279427 | Basal       | SOX2                    |
| NAPG      | 0.499670728 | 0.003462059 | 0.014108599 | 57.91755322 | 29.49803192 | Superficial | SOX2                    |
| MNAT1     | 0.499035232 | 0.001526458 | 0.009387421 | 33.82642552 | 15.08818925 | Superficial | SOX2                    |
| HNRNPA2B1 | 0.497371459 | 0.015054848 | 0.038009884 | 74.51684124 | 46.06121545 | Superficial | SOX2                    |
| CEP44     | 0.497034882 | 0.021001058 | 0.04834985  | 13.30912046 | 5.031562544 | Superficial | SOX2                    |
| FAM111A   | 0.496459518 | 0.005105016 | 0.024262694 | 17.72632172 | 10.20689672 | Suprabasal  | SOX2                    |
| GUCD1     | 0.49643982  | 0.001883197 | 0.018415354 | 31.74971695 | 16.31569375 | Basal       | SOX2                    |
| CLUAP1    | 0.496336728 | 0.008904627 | 0.034252903 | 21.28641366 | 11.54826649 | Suprabasal  | SOX2                    |
| KCTD3     | 0.494652574 | 0.009923212 | 0.014320968 | 39.57678112 | 21.59878832 | Basal       | SOX2                    |
| SAP30     | 0.493979071 | 0.007423146 | 0.036548425 | 45.00566094 | 26.41014799 | Basal       | SOX2                    |
| HNRNPR    | 0.491063799 | 0.017811616 | 0.043066688 | 47.55427304 | 22.21570082 | Superficial | SOX2                    |
| NRDC      | 0.490991214 | 0.021001058 | 0.04834985  | 55.72038228 | 30.60547076 | Superficial | SOX2                    |
| TRIM33    | 0.489450207 | 0.017811616 | 0.043066688 | 39.7606089  | 17.51831737 | Superficial | SOX2 + KLF5, SOX2       |
| SEC61A1   | 0.488628097 | 0.015054848 | 0.038009884 | 45.15063283 | 22.414793   | Superficial | SOX2                    |
| WDHD1     | 0.488116912 | 0.001526458 | 0.016792744 | 24.01800884 | 13.26388537 | Basal       | SOX2                    |

|          |             |             |             |             |             |             |                   |
|----------|-------------|-------------|-------------|-------------|-------------|-------------|-------------------|
| SPAG9    | 0.48675745  | 0.000795824 | 0.0136425   | 51.34410616 | 30.18405598 | Basal       | SOX2              |
| SEC14L2  | 0.486212927 | 0.001883197 | 0.018415354 | 12.00086909 | 5.227538256 | Basal       | SOX2              |
| MRPS31   | 0.486202719 | 0.017811616 | 0.043066688 | 38.70154943 | 17.3136704  | Superficial | SOX2              |
| BDKRB2   | 0.485062961 | 0.006166656 | 0.032981404 | 17.36183784 | 8.801648887 | Basal       | SOX2              |
| SRPK2    | 0.482498645 | 0.003462059 | 0.014108599 | 44.41141015 | 20.7636501  | Superficial | SOX2              |
| PSMA1    | 0.482165624 | 0.008904627 | 0.025990329 | 65.97719582 | 36.27990299 | Superficial | SOX2              |
| TPGS1    | 0.481782703 | 0.017811616 | 0.043066688 | 41.59724017 | 19.97718233 | Superficial | SOX2              |
| CACTIN   | 0.481764839 | 0.010644787 | 0.038255467 | 9.797951605 | 5.480509165 | Suprabasal  | SOX2              |
| CTTN     | 0.481760114 | 0.002315114 | 0.020052792 | 68.34703483 | 44.04458385 | Basal       | SOX2              |
| ZDHHC5   | 0.481638674 | 0.002836074 | 0.022562695 | 45.41187793 | 26.26191115 | Basal       | SOX2              |
| SH3GL1   | 0.481509796 | 0.000317696 | 0.012455402 | 40.9722635  | 22.65329046 | Basal       | SOX2              |
| FMR1     | 0.481142069 | 0.005105016 | 0.024262694 | 43.2968248  | 26.86475631 | Suprabasal  | SOX2              |
| NADK     | 0.480684707 | 0.010644787 | 0.044687249 | 20.85555924 | 10.89633778 | Basal       | SOX2              |
| RALY     | 0.479004374 | 0.017811616 | 0.043066688 | 71.36994745 | 45.26189074 | Superficial | SOX2              |
| SPECC1   | 0.478790004 | 0.010644787 | 0.044687249 | 16.64152372 | 8.452011622 | Basal       | SOX2              |
| DNAJB14  | 0.47843695  | 0.007423146 | 0.022959455 | 35.23391723 | 15.120162   | Superficial | SOX2              |
| TRIM16   | 0.475968725 | 0.006166656 | 0.032981404 | 45.63964355 | 28.50255283 | Basal       | SOX2              |
| DVL3     | 0.475846201 | 0.000250281 | 0.010489143 | 34.21125811 | 21.10756577 | Suprabasal  | SOX2              |
| ARMC1    | 0.474807714 | 0.008904627 | 0.025990329 | 27.30242392 | 11.60866805 | Superficial | SOX2              |
| R3HDM4   | 0.474476837 | 0.000992312 | 0.014320968 | 34.1889281  | 18.11556037 | Basal       | SOX2              |
| TWF1     | 0.473939191 | 0.001883197 | 0.018415354 | 57.49152249 | 35.50918611 | Basal       | SOX2              |
| DENND2D  | 0.47280977  | 0.000317696 | 0.012455402 | 36.61631128 | 20.5686023  | Basal       | SOX2              |
| AHNAK    | 0.472580773 | 0.000992312 | 0.014320968 | 94.70051847 | 83.04168059 | Basal       | SOX2, SOX2 + KLF5 |
| SIK3     | 0.471835245 | 0.003462059 | 0.024854712 | 16.02132565 | 7.698144507 | Basal       | SOX2              |
| EHD1     | 0.471129417 | 0.006166656 | 0.032981404 | 18.87141849 | 9.712745193 | Basal       | SOX2              |
| SCO1     | 0.469811368 | 0.002315114 | 0.011381143 | 27.81739673 | 11.84774497 | Superficial | SOX2              |
| RCN1     | 0.469437498 | 0.007423146 | 0.030449933 | 39.25339792 | 22.71572912 | Suprabasal  | SOX2              |
| THUMPD3  | 0.469358263 | 0.021001058 | 0.04834985  | 30.94173887 | 12.9790936  | Superficial | SOX2              |
| RYK      | 0.469142284 | 0.002315114 | 0.011381143 | 30.19491679 | 13.27920261 | Superficial | SOX2              |
| PHF20L1  | 0.468437348 | 0.007423146 | 0.022959455 | 61.30332804 | 34.85572051 | Superficial | SOX2              |
| SHCBP1   | 0.467837807 | 0.005105016 | 0.029792864 | 22.36528606 | 12.86186587 | Basal       | SOX2              |
| DENND1A  | 0.467812365 | 0.012681065 | 0.042921737 | 6.96267468  | 4.220814957 | Suprabasal  | SOX2 + KLF5       |
| PPM1D    | 0.467316307 | 0.002836074 | 0.022562695 | 13.17120466 | 6.699147999 | Basal       | SOX2              |
| ZNF598   | 0.466855393 | 0.002315114 | 0.020052792 | 20.47352294 | 10.30751396 | Basal       | SOX2              |
| PGAP2    | 0.466709668 | 0.012681065 | 0.033478436 | 35.43820831 | 16.82219589 | Superficial | SOX2              |
| PELP1    | 0.466601935 | 0.005105016 | 0.024262694 | 27.07148126 | 15.08417818 | Suprabasal  | SOX2              |
| MAP4K4   | 0.464946588 | 0.002315114 | 0.020052792 | 29.0491676  | 15.70885276 | Basal       | SOX2              |
| USP22    | 0.463671294 | 0.012681065 | 0.042921737 | 44.5022348  | 27.78089775 | Suprabasal  | SOX2              |
| MGAT4B   | 0.463578307 | 0.012681065 | 0.033478436 | 63.79064886 | 35.34931688 | Superficial | SOX2              |
| DUSP16   | 0.463416326 | 0.010644787 | 0.044687249 | 12.4917934  | 5.563776748 | Basal       | SOX2              |
| FAAP100  | 0.462850974 | 0.003462059 | 0.024854712 | 14.96658424 | 7.878325253 | Basal       | SOX2              |
| ERICH1   | 0.462223974 | 0.015054848 | 0.038009884 | 25.89510034 | 10.06784504 | Superficial | SOX2              |
| SLC22A23 | 0.461757582 | 0.006166656 | 0.027303057 | 39.49224725 | 24.87529787 | Suprabasal  | SOX2              |
| STAM2    | 0.459897509 | 0.002836074 | 0.0176927   | 43.15189679 | 27.25445502 | Suprabasal  | SOX2              |
| STRN4    | 0.459425666 | 0.000506425 | 0.012898798 | 25.0584803  | 12.69442914 | Suprabasal  | SOX2              |
| PRKCI    | 0.459071509 | 0.012681065 | 0.042921737 | 51.41691073 | 33.04730749 | Suprabasal  | SOX2              |
| GATAD2A  | 0.458863107 | 0.003462059 | 0.024854712 | 35.79161866 | 18.9186545  | Basal       | SOX2              |
| TMEM68   | 0.458247895 | 0.015054848 | 0.038009884 | 16.45128655 | 6.283049534 | Superficial | SOX2              |
| EIF5B    | 0.45771753  | 0.017811616 | 0.043066688 | 63.11019127 | 36.34802617 | Superficial | SOX2              |
| NUP98    | 0.457010854 | 0.000992312 | 0.014320968 | 32.6907407  | 17.7336952  | Basal       | SOX2              |
| DYNC1L12 | 0.456769397 | 0.000635975 | 0.007274975 | 61.99864339 | 35.22299681 | Superficial | SOX2              |
| CAND1    | 0.454883616 | 0.015054848 | 0.048140298 | 51.67717794 | 32.39796423 | Suprabasal  | SOX2              |
| SEC16A   | 0.454482179 | 0.010644787 | 0.044687249 | 21.18626829 | 10.61205209 | Basal       | SOX2              |
| ADAM17   | 0.453611455 | 0.010644787 | 0.029507311 | 30.19171051 | 11.82663939 | Superficial | SOX2              |
| THUMPD2  | 0.45263715  | 0.021001058 | 0.04834985  | 15.97784169 | 6.56066906  | Superficial | SOX2 + KLF5       |
| ACACA    | 0.452417245 | 0.008904627 | 0.040392504 | 29.6471181  | 15.65104834 | Basal       | SOX2              |
| PPP2R5E  | 0.452064751 | 0.021001058 | 0.04834985  | 55.92045393 | 30.5051335  | Superficial | SOX2              |
| SLK      | 0.451135179 | 0.000401828 | 0.012455402 | 60.34261778 | 38.60359737 | Basal       | SOX2              |
| MOCOS    | 0.450507041 | 0.007423146 | 0.036548425 | 11.66780025 | 6.100869399 | Basal       | SOX2              |
| TCOF1    | 0.449688868 | 0.001526458 | 0.016792744 | 41.03802722 | 24.1069045  | Basal       | SOX2              |
| PANX1    | 0.449051913 | 0.012681065 | 0.049425568 | 9.645531418 | 4.874082636 | Basal       | SOX2              |
| ZFP90    | 0.448202743 | 0.002315114 | 0.016074975 | 15.3130742  | 8.801039518 | Suprabasal  | SOX2              |
| FBXO46   | 0.447624189 | 0.000992312 | 0.014320968 | 16.59204452 | 8.127326468 | Basal       | SOX2              |
| STRN     | 0.447432023 | 0.010644787 | 0.044687249 | 38.84829394 | 21.44867213 | Basal       | SOX2              |
| NOL6     | 0.446672582 | 0.010644787 | 0.044687249 | 13.11910862 | 6.729699791 | Basal       | SOX2              |
| MDN1     | 0.446383845 | 0.005105016 | 0.029792864 | 24.44692351 | 12.62374257 | Basal       | SOX2              |
| CNN2     | 0.445861687 | 0.006166656 | 0.032981404 | 56.8142339  | 32.70563775 | Basal       | SOX2              |
| ADA      | 0.445206613 | 0.005105016 | 0.029792864 | 22.03751847 | 11.78920222 | Basal       | SOX2              |
| FBRS     | 0.444705702 | 0.012681065 | 0.049425568 | 30.07899109 | 15.75416998 | Basal       | SOX2              |
| STON2    | 0.443577293 | 0.008904627 | 0.034252903 | 31.50370257 | 18.35266099 | Suprabasal  | SOX2              |
| ACOX1    | 0.442951284 | 0.004211401 | 0.027185186 | 30.32328526 | 15.83888351 | Basal       | SOX2 + KLF5       |
| NEDD1    | 0.442012152 | 0.008904627 | 0.034252903 | 14.81115727 | 7.965198757 | Suprabasal  | SOX2              |
| ARAF     | 0.44188733  | 0.001883197 | 0.018415354 | 23.96647628 | 12.83259466 | Basal       | SOX2              |
| GTF3C4   | 0.438299723 | 0.010644787 | 0.038255467 | 20.14127445 | 12.16362485 | Suprabasal  | SOX2              |
| ARMT1    | 0.437711806 | 0.010644787 | 0.029507311 | 27.61166468 | 11.64950814 | Superficial | SOX2              |
| ZNF513   | 0.437149719 | 0.002836074 | 0.0176927   | 13.08879921 | 8.269687283 | Suprabasal  | SOX2              |
| GPC1     | 0.4335995   | 0.005105016 | 0.024262694 | 58.84720048 | 40.39056084 | Suprabasal  | SOX2              |
| PLS1     | 0.433501833 | 0.007423146 | 0.036548425 | 23.59769785 | 12.01671039 | Basal       | SOX2 + KLF5       |
| TOPBP1   | 0.432977178 | 0.003462059 | 0.019729589 | 26.22138818 | 15.40008064 | Suprabasal  | SOX2              |
| CTSB     | 0.43282805  | 0.002315114 | 0.020052792 | 79.26851537 | 55.67357313 | Basal       | SOX2              |

|          |              |             |             |             |             |             |                   |
|----------|--------------|-------------|-------------|-------------|-------------|-------------|-------------------|
| CRABP2   | 0.432650393  | 0.008904627 | 0.040392504 | 83.33089204 | 72.13197537 | Basal       | SOX2              |
| RAD54L2  | 0.431128164  | 0.006166656 | 0.027303057 | 13.54171258 | 7.65361492  | Suprabasal  | SOX2              |
| PCBP4    | 0.430029248  | 0.012681065 | 0.042921737 | 12.17578092 | 7.218205687 | Suprabasal  | SOX2              |
| SMCHD1   | 0.429808244  | 0.006166656 | 0.027303057 | 37.02295778 | 22.63417127 | Suprabasal  | SOX2              |
| SNX1     | 0.429491131  | 0.002315114 | 0.016074975 | 63.4365984  | 43.72910637 | Suprabasal  | SOX2              |
| DHX32    | 0.427564306  | 0.005105016 | 0.029792864 | 29.98898918 | 16.15208417 | Basal       | SOX2              |
| PTPN9    | 0.426795876  | 0.015054848 | 0.048140298 | 12.96039252 | 7.098054443 | Suprabasal  | SOX2              |
| SRPRA    | 0.426396935  | 0.002315114 | 0.020052792 | 47.1307841  | 26.94631004 | Basal       | SOX2              |
| MAPRE3   | 0.426209732  | 0.012681065 | 0.042921737 | 6.598992634 | 3.77396755  | Suprabasal  | SOX2              |
| STK24    | 0.423981945  | 0.004211401 | 0.027185186 | 66.7561237  | 42.88101471 | Basal       | SOX2              |
| PPIL4    | 0.423935678  | 0.001526458 | 0.009387421 | 33.29502682 | 14.07107106 | Superficial | SOX2              |
| HDAC2    | 0.423736835  | 0.012681065 | 0.033478436 | 46.77046386 | 22.13070123 | Superficial | SOX2              |
| DONSON   | 0.422694654  | 0.002315114 | 0.020052792 | 18.01339736 | 10.3784105  | Basal       | SOX2              |
| ATAD2    | 0.422335996  | 0.007423146 | 0.036548425 | 52.37566144 | 34.75413718 | Basal       | SOX2              |
| EIF4G3   | 0.421871801  | 0.012681065 | 0.033478436 | 41.23540469 | 19.80500389 | Superficial | SOX2 + KLF5       |
| KIF1B    | 0.421858334  | 0.001232925 | 0.015721789 | 28.04042735 | 15.11331966 | Basal       | SOX2              |
| CSNK1G2  | 0.421806566  | 0.001526458 | 0.016792744 | 41.06864299 | 23.48149592 | Basal       | SOX2              |
| AP1S1    | 0.421228877  | 0.015054848 | 0.038009884 | 48.96038672 | 26.48981535 | Superficial | SOX2              |
| TAF13    | 0.420823645  | 0.007423146 | 0.036548425 | 21.98425883 | 10.86907487 | Basal       | SOX2              |
| RPRD1B   | 0.420555262  | 0.004211401 | 0.027185186 | 24.94256673 | 13.10438258 | Basal       | SOX2              |
| PSME3    | 0.419754849  | 0.003462059 | 0.024854712 | 36.95658387 | 21.39527241 | Basal       | SOX2              |
| EIF4G2   | 0.419134212  | 0.005105016 | 0.029792864 | 89.21513224 | 71.25553618 | Basal       | SOX2              |
| ABHD17C  | 0.418557758  | 0.007423146 | 0.036548425 | 29.43653927 | 15.59754586 | Basal       | SOX2              |
| BAG3     | 0.418424075  | 0.001526458 | 0.016792744 | 57.19094076 | 35.78013283 | Basal       | SOX2              |
| DCTN1    | 0.418072859  | 0.002315114 | 0.016074975 | 51.97888715 | 35.8322889  | Suprabasal  | SOX2              |
| SOS1     | 0.416701949  | 0.004211401 | 0.021879278 | 38.80402609 | 24.64701172 | Suprabasal  | SOX2              |
| PLD1     | 0.416621216  | 0.010644787 | 0.044687249 | 26.55414004 | 14.95657525 | Basal       | SOX2 + KLF5       |
| CSNK2A2  | 0.416250629  | 0.007423146 | 0.030449933 | 49.98222445 | 31.77717767 | Suprabasal  | SOX2              |
| SIGMAR1  | 0.415664039  | 0.010644787 | 0.044687249 | 45.53288418 | 27.00160704 | Basal       | SOX2              |
| BAIAP2L1 | 0.414981604  | 0.000992312 | 0.014320968 | 23.04935728 | 12.37712073 | Basal       | SOX2, SOX2 + KLF5 |
| RRAGD    | 0.411940318  | 0.008904627 | 0.025990329 | 53.16936183 | 28.17200598 | Superficial | SOX2              |
| LARP4B   | 0.4111512699 | 0.015054848 | 0.048140298 | 44.28576258 | 28.30531636 | Suprabasal  | SOX2              |
| RRP1B    | 0.411164292  | 0.000795824 | 0.010838271 | 32.97235215 | 19.66653476 | Suprabasal  | SOX2              |
| MAPK1    | 0.410899477  | 0.005105016 | 0.029792864 | 48.74884732 | 28.8759107  | Basal       | SOX2              |
| OXSRI    | 0.410887757  | 0.012681065 | 0.049425568 | 31.81485499 | 17.55439172 | Basal       | SOX2              |
| PPP4R3A  | 0.409837121  | 0.012681065 | 0.042921737 | 46.70037185 | 29.32635926 | Suprabasal  | SOX2              |
| ABR      | 0.40963197   | 0.008904627 | 0.040392504 | 28.23171008 | 14.95736728 | Basal       | SOX2 + KLF5       |
| TULP4    | 0.409453896  | 0.000992312 | 0.01142308  | 35.80588971 | 22.82858622 | Suprabasal  | SOX2 + KLF5       |
| DARS2    | 0.408800324  | 0.007423146 | 0.036548425 | 16.0927049  | 8.816252156 | Basal       | SOX2              |
| TULP3    | 0.40868924   | 0.004211401 | 0.021879278 | 33.2829504  | 21.53384324 | Suprabasal  | SOX2 + KLF5, SOX2 |
| RAB6A    | 0.408482401  | 0.012681065 | 0.033478436 | 64.19858162 | 38.33939519 | Superficial | SOX2              |
| NF2      | 0.407599037  | 0.000401828 | 0.012455402 | 24.32252414 | 13.08445788 | Basal       | SOX2              |
| HNRNPUL1 | 0.404922839  | 0.000795824 | 0.010838271 | 60.58384221 | 41.805875   | Suprabasal  | SOX2              |
| UBE3A    | 0.404126921  | 0.008904627 | 0.025990329 | 52.68022712 | 27.47703569 | Superficial | SOX2              |
| DNAJC21  | 0.40361818   | 0.000992312 | 0.008042817 | 59.66645697 | 34.72447459 | Superficial | SOX2 + KLF5, SOX2 |
| CREBBP   | 0.402571645  | 0.015054848 | 0.048140298 | 39.79409462 | 25.00942118 | Suprabasal  | SOX2              |
| SMYD4    | 0.402425291  | 0.008904627 | 0.034252903 | 7.546562152 | 4.396569188 | Suprabasal  | SOX2              |
| FAM204A  | 0.399857747  | 0.003462059 | 0.014108599 | 44.29048694 | 20.2946133  | Superficial | SOX2              |
| SRBD1    | 0.399456503  | 0.007423146 | 0.030449933 | 14.79261982 | 9.197075729 | Suprabasal  | SOX2              |
| HLA-E    | 0.399386809  | 0.002315114 | 0.020052792 | 91.46666117 | 75.79158387 | Basal       | SOX2              |
| CUL1     | 0.398192813  | 0.007423146 | 0.030449933 | 40.65802972 | 25.80310235 | Suprabasal  | SOX2              |
| PSMA5    | 0.398145724  | 0.021001058 | 0.04834985  | 65.47278703 | 39.48031861 | Superficial | SOX2              |
| KAT5     | 0.396068142  | 0.005105016 | 0.018023407 | 28.64432152 | 13.29728154 | Superficial | SOX2              |
| HDLBP    | 0.394837607  | 0.000401828 | 0.012455402 | 79.95998073 | 57.10289635 | Basal       | SOX2              |
| ABCB7    | 0.392337334  | 0.003462059 | 0.014108599 | 21.58574896 | 8.96363631  | Superficial | SOX2              |
| LRRFIP1  | 0.391779281  | 0.000401828 | 0.012455402 | 76.39416407 | 54.39210723 | Basal       | SOX2              |
| CAB39    | 0.391085547  | 0.008904627 | 0.040392504 | 38.52456553 | 21.76720296 | Basal       | SOX2              |
| ZNF740   | 0.387806449  | 0.003462059 | 0.019729589 | 11.0501489  | 6.429114307 | Suprabasal  | SOX2              |
| DNAJC5   | 0.387002103  | 0.006166656 | 0.032981404 | 30.47029786 | 16.50597108 | Basal       | SOX2              |
| VBP1     | 0.386752618  | 0.021001058 | 0.04834985  | 48.30199504 | 24.9791918  | Superficial | SOX2              |
| VGLL4    | 0.386286071  | 0.006166656 | 0.027303057 | 69.20123638 | 49.11019076 | Suprabasal  | SOX2              |
| PPARD    | 0.385509275  | 0.005105016 | 0.029792864 | 13.50772511 | 7.152754309 | Basal       | SOX2              |
| RAVER2   | 0.385020215  | 0.015054848 | 0.048140298 | 11.98122369 | 7.225062747 | Suprabasal  | SOX2              |
| IQCK     | 0.384096874  | 0.015054848 | 0.048140298 | 7.59743852  | 4.233400157 | Suprabasal  | SOX2              |
| CAP1     | 0.383283453  | 0.004211401 | 0.027185186 | 70.38203023 | 48.7778019  | Basal       | SOX2              |
| PRCC     | 0.382064623  | 0.001883197 | 0.010234018 | 33.12701812 | 15.6260195  | Superficial | SOX2              |
| SPINT2   | 0.381507478  | 0.017811616 | 0.043066688 | 89.89260612 | 77.91907541 | Superficial | SOX2              |
| ATP6V1C1 | 0.38106856   | 0.004211401 | 0.021879278 | 29.29032455 | 18.23094114 | Suprabasal  | SOX2              |
| HNRNPDP  | 0.379637837  | 0.008904627 | 0.025990329 | 66.22805206 | 39.57404479 | Superficial | SOX2              |
| EZH2     | 0.379576368  | 0.004211401 | 0.027185186 | 40.42867394 | 25.49765124 | Basal       | SOX2              |
| ZFP64    | 0.37948406   | 0.010644787 | 0.038255467 | 12.40083125 | 7.455865285 | Suprabasal  | SOX2              |
| GNL1     | 0.37843941   | 0.006166656 | 0.020290909 | 31.11718831 | 14.43086912 | Superficial | SOX2              |
| CDK12    | 0.378351456  | 0.001526458 | 0.013290882 | 48.53275386 | 31.62280627 | Suprabasal  | SOX2              |
| NCKAP1   | 0.378170379  | 0.010644787 | 0.044687249 | 58.11956911 | 37.04242786 | Basal       | SOX2              |
| ZNF672   | 0.376681299  | 0.010644787 | 0.044687249 | 19.56555888 | 10.59380964 | Basal       | SOX2              |
| POLR2B   | 0.37636934   | 0.012681065 | 0.042921737 | 41.3802777  | 24.66201886 | Suprabasal  | SOX2              |
| GMCL1    | 0.375873197  | 0.007423146 | 0.022959455 | 31.99316097 | 14.72130798 | Superficial | SOX2              |
| KCTD5    | 0.375183782  | 0.004211401 | 0.027185186 | 23.89015549 | 13.41836054 | Basal       | SOX2              |
| GDE1     | 0.372793116  | 0.021001058 | 0.04834985  | 46.2836854  | 23.83445075 | Superficial | SOX2              |
| HGS      | 0.372464258  | 0.002836074 | 0.022562695 | 37.66991891 | 21.6422198  | Basal       | SOX2              |

|           |             |             |             |             |             |             |                   |
|-----------|-------------|-------------|-------------|-------------|-------------|-------------|-------------------|
| ACTR1A    | 0.372227417 | 0.004211401 | 0.027185186 | 36.13204977 | 21.11663527 | Basal       | SOX2              |
| SRRT      | 0.371491622 | 0.001883197 | 0.014679007 | 37.76365529 | 23.85917939 | Suprabasal  | SOX2              |
| TCFL5     | 0.371359147 | 0.000506425 | 0.010489143 | 8.353413253 | 4.994880006 | Suprabasal  | SOX2              |
| ASB6      | 0.367944847 | 0.003462059 | 0.024854712 | 12.57515056 | 6.43489909  | Basal       | SOX2              |
| DSN1      | 0.367401907 | 0.006166656 | 0.027303057 | 14.87864595 | 9.062953013 | Suprabasal  | SOX2              |
| KLF5      | 0.366989473 | 0.004211401 | 0.016013117 | 90.73767968 | 78.42717769 | Superficial | KLF5, SOX2 + KLF5 |
| UBE3B     | 0.365018038 | 0.010644787 | 0.044687249 | 22.00039008 | 11.50400949 | Basal       | SOX2              |
| CLSPN     | 0.364721605 | 0.012681065 | 0.049425568 | 28.84436189 | 17.50717111 | Basal       | SOX2              |
| EIF4ENIF1 | 0.364297387 | 0.000635975 | 0.010733065 | 22.31296889 | 13.97106774 | Suprabasal  | SOX2              |
| C6orf132  | 0.363808744 | 0.001232925 | 0.015721789 | 47.99793227 | 30.24246367 | Basal       | SOX2              |
| TMCC1     | 0.361299072 | 0.002836074 | 0.022562695 | 15.70166472 | 8.402344171 | Basal       | SOX2              |
| SPATS2L   | 0.360680694 | 0.000992312 | 0.01142308  | 80.43917619 | 62.40270925 | Suprabasal  | KLF5              |
| CDC26     | 0.359851754 | 0.005105016 | 0.018023407 | 53.12997972 | 29.84803495 | Superficial | SOX2              |
| HOOK2     | 0.359210707 | 0.021001058 | 0.04834985  | 48.76542349 | 25.87326508 | Superficial | SOX2              |
| RASAL2    | 0.357863099 | 0.012681065 | 0.049425568 | 28.13204675 | 15.36324284 | Basal       | SOX2              |
| GALE      | 0.357551358 | 0.010644787 | 0.044687249 | 38.86560774 | 23.09276026 | Basal       | SOX2              |
| MASTL     | 0.355928529 | 0.010644787 | 0.044687249 | 22.26375576 | 12.5982032  | Basal       | SOX2              |
| CUL4A     | 0.354110326 | 0.003462059 | 0.024854712 | 38.8403561  | 23.05650822 | Basal       | SOX2              |
| TMOD3     | 0.353471008 | 0.010644787 | 0.044687249 | 73.12027102 | 52.13714682 | Basal       | SOX2              |
| NUDT4     | 0.353268938 | 0.008904627 | 0.034252903 | 30.43480114 | 18.89608606 | Suprabasal  | SOX2, SOX2 + KLF5 |
| XPO1      | 0.352059571 | 0.015054848 | 0.048140298 | 60.17473282 | 39.24143377 | Suprabasal  | SOX2              |
| ZNF330    | 0.352054942 | 0.021001058 | 0.04834985  | 33.66922418 | 16.39634589 | Superficial | SOX2              |
| TLK2      | 0.351292132 | 0.007423146 | 0.030449933 | 37.89732037 | 23.84071245 | Suprabasal  | SOX2              |
| LONP1     | 0.351176435 | 0.010644787 | 0.044687249 | 27.96313576 | 15.97710597 | Basal       | SOX2              |
| TADA2A    | 0.350900882 | 0.004211401 | 0.021879278 | 16.73317655 | 10.39759773 | Suprabasal  | SOX2 + KLF5, SOX2 |
| UBAP1     | 0.348148108 | 0.012681065 | 0.049425568 | 28.3949319  | 15.61827932 | Basal       | SOX2              |
| ETF1      | 0.347930763 | 0.012681065 | 0.049425568 | 64.85346179 | 43.8817305  | Basal       | SOX2              |
| SIN3B     | 0.345189095 | 0.010644787 | 0.038255467 | 21.68181576 | 14.24138181 | Suprabasal  | SOX2              |
| EHMT1     | 0.344749701 | 0.021232925 | 0.015721789 | 34.67135042 | 19.58732315 | Basal       | SOX2              |
| NOM1      | 0.341602586 | 0.004211401 | 0.027185186 | 29.52543453 | 17.88515075 | Basal       | SOX2              |
| DCAF7     | 0.341384602 | 0.021001058 | 0.04834985  | 34.97799652 | 16.46057478 | Superficial | SOX2              |
| HECTD1    | 0.341197856 | 0.008904627 | 0.040392504 | 55.19918194 | 35.45256688 | Basal       | SOX2              |
| ETAA1     | 0.34086341  | 0.002836074 | 0.0176927   | 18.78995792 | 11.89426174 | Suprabasal  | SOX2              |
| FOXK2     | 0.340257957 | 0.000635975 | 0.012925379 | 28.52080745 | 15.8799137  | Basal       | SOX2              |
| MPRIIP    | 0.339903944 | 0.012681065 | 0.049425568 | 29.41008776 | 16.52158519 | Basal       | SOX2              |
| ACTN4     | 0.337577641 | 0.010644787 | 0.044687249 | 82.9768807  | 62.57568151 | Basal       | SOX2              |
| UBQLN1    | 0.337087049 | 0.007423146 | 0.036548425 | 47.23144812 | 28.48757739 | Basal       | SOX2              |
| ZNF398    | 0.335352651 | 0.012681065 | 0.049425568 | 11.78243869 | 6.596489406 | Basal       | SOX2              |
| PGRMC2    | 0.335234595 | 0.021001058 | 0.04834985  | 52.81530241 | 27.35480933 | Superficial | SOX2              |
| BAG6      | 0.334098072 | 0.000635975 | 0.012925379 | 45.49164076 | 27.55833727 | Basal       | SOX2              |
| CD2AP     | 0.328979616 | 0.007423146 | 0.036548425 | 55.36500458 | 35.22370908 | Basal       | SOX2              |
| MARK3     | 0.328532891 | 0.001232925 | 0.015721789 | 39.36693965 | 23.67234087 | Basal       | SOX2              |
| BTBD10    | 0.324843477 | 0.012681065 | 0.049425568 | 37.09246296 | 21.95821711 | Basal       | SOX2              |
| RAF1      | 0.324610208 | 0.010644787 | 0.044687249 | 37.95147784 | 22.23152954 | Basal       | SOX2              |
| SNX9      | 0.323080903 | 0.003462059 | 0.024854712 | 31.57020056 | 18.17767224 | Basal       | SOX2              |
| RNF126    | 0.321893513 | 0.012681065 | 0.049425568 | 56.94156687 | 36.51439612 | Basal       | SOX2              |
| NCAPD3    | 0.319375719 | 0.005105016 | 0.029792864 | 37.33730953 | 23.54175813 | Basal       | SOX2              |
| TPD52L1   | 0.319203489 | 0.012681065 | 0.049425568 | 70.8735422  | 49.83127217 | Basal       | SOX2              |
| TADA2B    | 0.318377235 | 0.007423146 | 0.036548425 | 11.44702194 | 6.08819351  | Basal       | SOX2              |
| RAD21     | 0.317255801 | 0.007423146 | 0.036548425 | 72.37467016 | 51.73760027 | Basal       | SOX2              |
| DPP9      | 0.316281208 | 0.005105016 | 0.029792864 | 24.5146002  | 13.78317029 | Basal       | SOX2              |
| DHX15     | 0.315489463 | 0.010644787 | 0.038255467 | 50.30688361 | 33.87821156 | Suprabasal  | SOX2              |
| PRRC2C    | 0.314883273 | 0.007423146 | 0.030449933 | 87.62866402 | 72.69746995 | Suprabasal  | SOX2              |
| AKAP8     | 0.314009175 | 0.005105016 | 0.024262694 | 26.62854161 | 16.76378779 | Suprabasal  | SOX2              |
| DNAAF5    | 0.313393642 | 0.004211401 | 0.027185186 | 25.39436291 | 14.69899341 | Basal       | SOX2              |
| CSNK1A1   | 0.311878468 | 0.002836074 | 0.0176927   | 93.53449428 | 84.71976112 | Suprabasal  | SOX2              |
| MIS18BP1  | 0.311634917 | 0.005105016 | 0.024262694 | 39.65562411 | 24.88374556 | Suprabasal  | SOX2              |
| ANKRD11   | 0.311535163 | 0.005105016 | 0.024262694 | 77.75687683 | 59.74175098 | Suprabasal  | SOX2              |
| SUPT5H    | 0.311462565 | 0.010644787 | 0.044687249 | 41.30614259 | 23.88312125 | Basal       | SOX2              |
| PRKCH     | 0.310775043 | 0.010644787 | 0.044687249 | 12.78922278 | 7.133312113 | Basal       | SOX2, SOX2 + KLF5 |
| ANXA11    | 0.309510653 | 0.007423146 | 0.036548425 | 80.1395934  | 59.90618267 | Basal       | SOX2 + KLF5       |
| SMARCA2   | 0.30736207  | 0.012681065 | 0.042921737 | 50.47896445 | 33.01055583 | Suprabasal  | SOX2              |
| RBM26     | 0.306807667 | 0.004211401 | 0.021879278 | 45.24969731 | 28.33994468 | Suprabasal  | SOX2              |
| EDC3      | 0.305267304 | 0.003462059 | 0.024854712 | 13.40354087 | 7.180247317 | Basal       | SOX2              |
| ACTB      | 0.304849735 | 0.004211401 | 0.027185186 | 99.71378693 | 97.52395914 | Basal       | SOX2              |
| RNASEL    | 0.304812706 | 0.008904627 | 0.034252903 | 20.4978733  | 13.22398589 | Suprabasal  | SOX2              |
| PRRG4     | 0.303894969 | 0.006166656 | 0.027303057 | 83.56882003 | 69.16067751 | Suprabasal  | SOX2, SOX2 + KLF5 |
| CNDP2     | 0.301775633 | 0.007423146 | 0.036548425 | 41.87890185 | 25.30966965 | Basal       | SOX2              |
| PPM1A     | 0.297552231 | 0.010644787 | 0.044687249 | 31.80766749 | 17.79182567 | Basal       | SOX2              |
| PCM1      | 0.29663167  | 0.012681065 | 0.042921737 | 62.41064601 | 43.03776245 | Suprabasal  | SOX2              |
| XRCC1     | 0.296049831 | 0.012681065 | 0.042921737 | 16.1532907  | 10.76767722 | Suprabasal  | SOX2              |
| PTBP1     | 0.294116815 | 0.005105016 | 0.029792864 | 65.2690628  | 44.63874797 | Basal       | SOX2              |
| RNF40     | 0.292210922 | 0.002836074 | 0.022562695 | 23.01616376 | 12.95846387 | Basal       | SOX2              |
| INTS14    | 0.291042279 | 0.012681065 | 0.042921737 | 21.96252873 | 13.69680143 | Suprabasal  | SOX2              |
| UBTF      | 0.289426243 | 0.004211401 | 0.021879278 | 55.33188696 | 37.74718139 | Suprabasal  | SOX2              |
| BDH1      | 0.287800194 | 0.001526458 | 0.016792744 | 37.68427329 | 23.60581804 | Basal       | SOX2              |
| ZNF174    | 0.285899464 | 0.006166656 | 0.027303057 | 6.81185006  | 4.65851935  | Suprabasal  | SOX2              |
| TAX1BP1   | 0.28569555  | 0.006166656 | 0.032981404 | 70.90543279 | 49.84024475 | Basal       | SOX2              |
| OPA3      | 0.285098991 | 0.015054848 | 0.048140298 | 18.78897384 | 12.76558836 | Suprabasal  | SOX2              |
| KPNA4     | 0.284385351 | 0.008904627 | 0.040392504 | 53.03150064 | 33.71170895 | Basal       | SOX2              |

|          |             |             |             |             |             |             |             |
|----------|-------------|-------------|-------------|-------------|-------------|-------------|-------------|
| CSNK1D   | 0.282246278 | 0.006166656 | 0.032981404 | 38.6253149  | 23.71317908 | Basal       | SOX2        |
| C6orf136 | 0.282069153 | 0.003462059 | 0.024854712 | 25.12174217 | 14.50978536 | Basal       | SOX2 + KLF5 |
| KDM2A    | 0.281821164 | 0.005105016 | 0.029792864 | 44.65559244 | 26.94707233 | Basal       | SOX2        |
| NFX1     | 0.281778885 | 0.008904627 | 0.034252903 | 30.94818377 | 19.69308165 | Suprabasal  | SOX2        |
| KAT7     | 0.280513646 | 0.003462059 | 0.019729589 | 31.96355226 | 20.50682651 | Suprabasal  | SOX2        |
| ZNF623   | 0.278474992 | 0.005105016 | 0.024262694 | 10.25246344 | 6.504611864 | Suprabasal  | SOX2        |
| PSMD2    | 0.278455513 | 0.017811616 | 0.043066688 | 64.95891017 | 40.28973587 | Superficial | SOX2        |
| SYNRG    | 0.277856083 | 0.008904627 | 0.040392504 | 27.18815891 | 15.59211998 | Basal       | SOX2        |
| CDKN2AIP | 0.27405597  | 0.003462059 | 0.024854712 | 48.78322567 | 32.15435898 | Basal       | SOX2        |
| APLP2    | 0.270292897 | 0.012681065 | 0.042921737 | 73.82533826 | 57.93670449 | Suprabasal  | SOX2        |
| SF3A1    | 0.268950282 | 0.002315114 | 0.020052792 | 40.45425161 | 24.11803561 | Basal       | SOX2        |
| DNAJC9   | 0.267541983 | 0.008904627 | 0.034252903 | 36.74656251 | 23.59342056 | Suprabasal  | SOX2        |
| PAWR     | 0.266458622 | 0.010644787 | 0.044687249 | 63.09732871 | 43.42629148 | Basal       | SOX2        |
| CTCF     | 0.266102688 | 0.010644787 | 0.038255467 | 50.85548206 | 33.85027116 | Suprabasal  | SOX2        |
| SMC3     | 0.265657661 | 0.010644787 | 0.038255467 | 66.24412926 | 45.72828955 | Suprabasal  | SOX2        |
| PAFAH1B2 | 0.265099423 | 0.006166656 | 0.032981404 | 49.89534049 | 31.20887734 | Basal       | SOX2        |
| DDA1     | 0.264148216 | 0.004211401 | 0.027185186 | 39.59917761 | 24.07286753 | Basal       | SOX2        |
| BRD4     | 0.260587942 | 0.010644787 | 0.044687249 | 59.06233998 | 38.69743774 | Basal       | SOX2        |
| EPN1     | 0.259066852 | 0.004211401 | 0.027185186 | 52.19066592 | 33.714443   | Basal       | SOX2        |
| NFKBIB   | 0.258046044 | 0.010644787 | 0.044687249 | 27.74931509 | 16.39772077 | Basal       | SOX2        |
| ELF1     | 0.257772111 | 0.006166656 | 0.027303057 | 78.78518903 | 61.89883688 | Suprabasal  | SOX2        |
| SAFB2    | 0.256603266 | 0.006166656 | 0.027303057 | 33.63209571 | 21.6889824  | Suprabasal  | SOX2        |
| SPINT1   | 0.251117707 | 0.008904627 | 0.040392504 | 62.93750767 | 43.57976501 | Basal       | SOX2        |

**Supplemental Table 8.** Gene expression profile of EoE DEGs known to be regulated by the SOX2-KLF5 interaction.

| gene     | Log2FC      | Pval        | FDR_Pval    | Top Changed Compartment |
|----------|-------------|-------------|-------------|-------------------------|
| NRXN1    | 5.011064578 | 0.000184184 | 0.010398392 | Suprabasal              |
| NFATC2   | 4.981012295 | 0.000989444 | 0.008042817 | Superficial             |
| KCNJ2    | 4.494243322 | 0.000506425 | 0.010398392 | Suprabasal              |
| BCL2L15  | 4.350031654 | 0.000153669 | 0.010398392 | Suprabasal              |
| RUNX2    | 3.769129479 | 0.000504805 | 0.007178523 | Superficial             |
| LYPD6B   | 3.712117954 | 0.004211401 | 0.016013117 | Superficial             |
| SGK1     | 3.680085691 | 0.000153669 | 0.007176147 | Superficial             |
| ST8SIA6  | 3.586099976 | 0.000634007 | 0.007274975 | Superficial             |
| CMYA5    | 3.552817397 | 0.001526458 | 0.009387421 | Superficial             |
| HRH1     | 3.502634807 | 0.000992312 | 0.011395032 | Suprabasal              |
| TNS4     | 2.993108132 | 0.001232925 | 0.008679903 | Superficial             |
| RASGRP1  | 2.869246892 | 0.000506425 | 0.010398392 | Suprabasal              |
| LY75     | 2.675558265 | 5.55E-05    | 0.007176147 | Superficial             |
| HS3ST3A1 | 2.549605795 | 0.003462059 | 0.014108599 | Superficial             |
| HS3ST1   | 2.544170249 | 0.000153669 | 0.010398392 | Suprabasal              |
| RARB     | 2.530013416 | 0.000992312 | 0.008042817 | Superficial             |
| CLDN1    | 2.418800238 | 0.000506425 | 0.007178523 | Superficial             |
| LITAF    | 2.418477626 | 0.000401828 | 0.010398392 | Suprabasal              |
| NRP2     | 2.366104366 | 0.001232925 | 0.01240258  | Suprabasal              |
| SOX21    | 2.296941678 | 0.000506425 | 0.007178523 | Superficial             |
| GGH      | 2.23883892  | 0.000317696 | 0.007176147 | Superficial             |
| UTRN     | 2.217242242 | 0.000196466 | 0.007176147 | Superficial             |
| MYOF     | 2.181332839 | 0.000795824 | 0.007615337 | Superficial             |
| GIPC2    | 2.130796901 | 0.000119764 | 0.007176147 | Superficial             |
| MYH9     | 2.016181739 | 0.000401828 | 0.007176147 | Superficial             |
| PDLIM4   | 1.989624172 | 0.000317696 | 0.007176147 | Superficial             |
| NUAK2    | 1.98293209  | 0.001232925 | 0.008679903 | Superficial             |
| LPCAT4   | 1.972938051 | 0.000795824 | 0.007615337 | Superficial             |
| LRRC8B   | 1.948757418 | 0.001526458 | 0.009387421 | Superficial             |
| TLE1     | 1.923101892 | 0.000119764 | 0.007176147 | Superficial             |
| SGMS2    | 1.870786282 | 0.000401828 | 0.007176147 | Superficial             |
| FMN1     | 1.866940741 | 0.000992312 | 0.008042817 | Superficial             |
| GCNT3    | 1.859066598 | 0.002315114 | 0.016076911 | Suprabasal              |
| SERPINB5 | 1.819859014 | 0.000506425 | 0.007178523 | Superficial             |
| ARHGAP26 | 1.751173085 | 7.20E-05    | 0.007176147 | Superficial             |
| ADAM9    | 1.72837896  | 0.001232925 | 0.01240258  | Suprabasal              |
| IGF2R    | 1.719942816 | 0.000992312 | 0.008042817 | Superficial             |
| ATP8B1   | 1.711098498 | 9.30E-05    | 0.010398392 | Suprabasal              |
| FAM3C    | 1.6929743   | 0.000992312 | 0.008042817 | Superficial             |
| CD9      | 1.664880927 | 0.000317696 | 0.007176147 | Superficial             |
| DSG3     | 1.659685097 | 0.000401828 | 0.007176147 | Superficial             |
| SERPINB2 | 1.591511492 | 0.000635975 | 0.010421015 | Suprabasal              |
| MACF1    | 1.585172836 | 0.001883197 | 0.010234018 | Superficial             |



|           |             |             |             |             |
|-----------|-------------|-------------|-------------|-------------|
| TMPRSS11D | 1.540082196 | 0.008904627 | 0.040392504 | Basal       |
| NRIP1     | 1.527774608 | 0.000992312 | 0.008042817 | Superficial |
| SETBP1    | 1.526392337 | 0.000795824 | 0.007615337 | Superficial |
| MYH14     | 1.506036602 | 0.000635975 | 0.007274975 | Superficial |
| MCC       | 1.495164205 | 0.001232925 | 0.008679903 | Superficial |
| SLC16A7   | 1.492659835 | 0.000317696 | 0.007176147 | Superficial |
| EEA1      | 1.479639763 | 0.000196466 | 0.007176147 | Superficial |
| KLF4      | 1.451647249 | 0.000317696 | 0.007176147 | Superficial |
| RAB11FIP1 | 1.442200578 | 0.000317696 | 0.012455402 | Basal       |
| ETS2      | 1.440460005 | 0.000317696 | 0.010398392 | Suprabasal  |
| TJP2      | 1.428786705 | 0.000250281 | 0.012455402 | Basal       |
| FAM83B    | 1.409210634 | 0.005105016 | 0.018023407 | Superficial |
| ANGPTL4   | 1.390767663 | 9.30E-05    | 0.012455402 | Basal       |
| OCIAD2    | 1.31691942  | 0.000795824 | 0.007615337 | Superficial |
| ARHGAP18  | 1.313208605 | 0.001526458 | 0.009387421 | Superficial |
| ERC1      | 1.308852525 | 0.000992312 | 0.008042817 | Superficial |
| SOX13     | 1.301876207 | 0.004211401 | 0.016013117 | Superficial |
| TMPRSS4   | 1.291648313 | 0.000317696 | 0.012455402 | Basal       |
| PDE4D     | 1.288243    | 0.003462059 | 0.014108599 | Superficial |
| SHROOM2   | 1.258271405 | 0.000635975 | 0.007274975 | Superficial |
| MREG      | 1.217754559 | 0.000401828 | 0.012455402 | Basal       |
| MBOAT2    | 1.21344202  | 0.000795824 | 0.0136425   | Basal       |
| ROCK2     | 1.20861768  | 0.001232925 | 0.008679903 | Superficial |
| LIMA1     | 1.205072658 | 0.001232925 | 0.008679903 | Superficial |
| SLC25A24  | 1.202476433 | 0.002836074 | 0.012662188 | Superficial |
| MYO10     | 1.19168863  | 0.000635975 | 0.007274975 | Superficial |
| AFF1      | 1.191217771 | 0.001526458 | 0.009387421 | Superficial |
| MLLT3     | 1.18449493  | 0.002836074 | 0.012662188 | Superficial |
| MEIS1     | 1.17701975  | 0.000992312 | 0.008042817 | Superficial |
| PARP12    | 1.170055421 | 0.000635975 | 0.012925379 | Basal       |
| RAPGEF5   | 1.161160462 | 0.000401828 | 0.007176147 | Superficial |
| BARX2     | 1.154142342 | 0.000317696 | 0.007176147 | Superficial |
| TP63      | 1.146853343 | 0.006166656 | 0.020290909 | Superficial |
| B4GALNT3  | 1.142848614 | 0.012681065 | 0.033478436 | Superficial |
| RPS6KA3   | 1.139760282 | 0.001232925 | 0.008679903 | Superficial |
| ROBO2     | 1.132994815 | 0.007423146 | 0.022959455 | Superficial |
| FOXQ1     | 1.123032095 | 0.000992312 | 0.011395032 | Suprabasal  |
| ACVR1     | 1.11208563  | 0.010644787 | 0.029507311 | Superficial |
| SLC5A3    | 1.108546111 | 0.017811616 | 0.043066688 | Superficial |
| EPHB6     | 1.098421093 | 0.002315114 | 0.011381143 | Superficial |
| CRYZ      | 1.092201992 | 0.001883197 | 0.010234018 | Superficial |
| TGFBR1    | 1.082552543 | 0.017811616 | 0.043066688 | Superficial |
| VCL       | 1.068576576 | 0.000401828 | 0.010398392 | Suprabasal  |
| IFIH1     | 1.055273435 | 0.002315114 | 0.016076911 | Suprabasal  |
| RAB11FIP2 | 1.051539922 | 0.004211401 | 0.016013117 | Superficial |
| CLDN4     | 1.046614095 | 0.003462059 | 0.024854712 | Basal       |
| GBP2      | 1.043537437 | 0.006166656 | 0.020290909 | Superficial |

|         |             |             |             |             |
|---------|-------------|-------------|-------------|-------------|
| PDZRN3  | 1.038845423 | 0.005105016 | 0.018023407 | Superficial |
| GJB5    | 1.036529192 | 0.012681065 | 0.033478436 | Superficial |
| USP12   | 1.026388333 | 0.001232925 | 0.01240258  | Suprabasal  |
| LMTK2   | 0.992632835 | 0.002315114 | 0.016076911 | Suprabasal  |
| ITGB8   | 0.982346099 | 0.012681065 | 0.04332227  | Suprabasal  |
| RNF19A  | 0.979825429 | 0.000250281 | 0.010398392 | Suprabasal  |
| EFNB2   | 0.971028932 | 0.002315114 | 0.011381143 | Superficial |
| CCDC88C | 0.960891309 | 0.008904627 | 0.025990329 | Superficial |
| MBNL3   | 0.951778334 | 0.005105016 | 0.018023407 | Superficial |
| GPHN    | 0.950352459 | 0.005105016 | 0.018023407 | Superficial |
| PKP1    | 0.940526247 | 0.005105016 | 0.018023407 | Superficial |
| ATXN1   | 0.939973269 | 0.008904627 | 0.025990329 | Superficial |
| TNK2    | 0.921895637 | 0.005105016 | 0.024729592 | Suprabasal  |
| SMPD3   | 0.91883153  | 0.012681065 | 0.033478436 | Superficial |
| ANK3    | 0.913274645 | 0.012681065 | 0.033478436 | Superficial |
| SLC4A7  | 0.899999926 | 0.017811616 | 0.043066688 | Superficial |
| ST14    | 0.89536654  | 7.20E-05    | 0.012455402 | Basal       |
| EPN2    | 0.893135704 | 0.000795824 | 0.007615337 | Superficial |
| KRT19   | 0.892179709 | 0.012681065 | 0.04332227  | Suprabasal  |
| BMPR2   | 0.892138295 | 0.001883197 | 0.010234018 | Superficial |
| TNRC18  | 0.889205782 | 0.017811616 | 0.043066688 | Superficial |
| FAM110C | 0.886645228 | 0.000506425 | 0.010398392 | Suprabasal  |
| LMO7    | 0.886093098 | 0.002315114 | 0.016076911 | Suprabasal  |
| NOL10   | 0.882088665 | 0.015054848 | 0.038009884 | Superficial |
| RNF19B  | 0.881491342 | 0.000506425 | 0.012898798 | Basal       |
| UGCG    | 0.880956022 | 0.000317696 | 0.012455402 | Basal       |
| BTG1    | 0.874641303 | 7.20E-05    | 0.007176147 | Superficial |
| ALCAM   | 0.848190649 | 0.007423146 | 0.022959455 | Superficial |
| DTNBP1  | 0.846794959 | 0.021001058 | 0.04834985  | Superficial |
| MAP3K8  | 0.845745236 | 0.004211401 | 0.027185186 | Basal       |
| MACC1   | 0.834417685 | 0.001883197 | 0.018415354 | Basal       |
| DNMBP   | 0.834004899 | 0.017811616 | 0.043066688 | Superficial |
| NDFIP2  | 0.829957287 | 0.000635975 | 0.010421015 | Suprabasal  |
| DSC3    | 0.82685136  | 0.021001058 | 0.04834985  | Superficial |
| TWF2    | 0.823549219 | 0.000992312 | 0.008042817 | Superficial |
| PPL     | 0.822801611 | 0.000317696 | 0.012455402 | Basal       |
| ACAD9   | 0.822605788 | 0.000401828 | 0.007176147 | Superficial |
| PIM1    | 0.816682613 | 0.000506425 | 0.012898798 | Basal       |
| TNIP1   | 0.799214391 | 0.000506425 | 0.010398392 | Suprabasal  |
| BACE2   | 0.792110852 | 0.000506425 | 0.010398392 | Suprabasal  |
| PLS1    | 0.792063723 | 0.002836074 | 0.018003296 | Suprabasal  |
| KCTD1   | 0.790819901 | 0.000795824 | 0.007615337 | Superficial |
| KLF3    | 0.788073544 | 0.000401828 | 0.010398392 | Suprabasal  |
| DSP     | 0.78419116  | 0.000506425 | 0.012898798 | Basal       |
| RASSF6  | 0.780974466 | 0.021001058 | 0.04834985  | Superficial |
| IL15    | 0.766980121 | 0.007423146 | 0.030890563 | Suprabasal  |
| CRADD   | 0.748667913 | 0.007423146 | 0.022959455 | Superficial |

|          |             |             |             |             |
|----------|-------------|-------------|-------------|-------------|
| FAM53B   | 0.742226226 | 0.002836074 | 0.018003296 | Suprabasal  |
| ACOX1    | 0.738898578 | 0.007423146 | 0.030890563 | Suprabasal  |
| ELF3     | 0.738836064 | 0.003462059 | 0.019935309 | Suprabasal  |
| ARFGAP3  | 0.737414745 | 0.004211401 | 0.016013117 | Superficial |
| ZFAND5   | 0.732780617 | 0.000635975 | 0.010421015 | Suprabasal  |
| EZR      | 0.72742657  | 0.002315114 | 0.020052792 | Basal       |
| KHDRBS3  | 0.710487783 | 0.000635975 | 0.012925379 | Basal       |
| MIPEP    | 0.707166754 | 0.021001058 | 0.04834985  | Superficial |
| SHROOM3  | 0.695335913 | 0.007423146 | 0.036548425 | Basal       |
| FCHSD2   | 0.691175748 | 0.007423146 | 0.030890563 | Suprabasal  |
| TXNRD1   | 0.681192793 | 0.004211401 | 0.022365923 | Suprabasal  |
| SGMS1    | 0.679915708 | 0.000250281 | 0.010398392 | Suprabasal  |
| ANXA11   | 0.668315198 | 0.000401828 | 0.010398392 | Suprabasal  |
| MAL2     | 0.666971971 | 0.000992312 | 0.014320968 | Basal       |
| B3GNT2   | 0.659308899 | 0.015054848 | 0.038009884 | Superficial |
| ILVBL    | 0.648089774 | 0.021001058 | 0.04834985  | Superficial |
| PACS1    | 0.624993882 | 0.000635975 | 0.012925379 | Basal       |
| RIN2     | 0.62340617  | 0.002836074 | 0.018003296 | Suprabasal  |
| TTC39C   | 0.619828384 | 0.017811616 | 0.043066688 | Superficial |
| NDUFA4   | 0.617621009 | 0.007423146 | 0.022959455 | Superficial |
| LMNA     | 0.616183225 | 0.002315114 | 0.011381143 | Superficial |
| JUN      | 0.612848095 | 0.010644787 | 0.029507311 | Superficial |
| NCOR2    | 0.603984188 | 0.005105016 | 0.024729592 | Suprabasal  |
| RAP2B    | 0.602604508 | 0.012681065 | 0.04332227  | Suprabasal  |
| MGAT4A   | 0.589001621 | 0.000250281 | 0.010398392 | Suprabasal  |
| HS6ST1   | 0.587523478 | 0.001883197 | 0.014590393 | Suprabasal  |
| IPMK     | 0.585907313 | 0.008904627 | 0.034887819 | Suprabasal  |
| PAIP2B   | 0.580739387 | 0.021001058 | 0.04834985  | Superficial |
| SPPL3    | 0.573634654 | 0.003462059 | 0.014108599 | Superficial |
| TULP3    | 0.561441423 | 0.000153669 | 0.010398392 | Suprabasal  |
| RAB27B   | 0.555355604 | 0.002315114 | 0.011381143 | Superficial |
| RERE     | 0.553739866 | 0.002315114 | 0.016076911 | Suprabasal  |
| RRP12    | 0.553439503 | 0.001232925 | 0.015721789 | Basal       |
| JUP      | 0.54864085  | 0.000795824 | 0.0136425   | Basal       |
| TRIP10   | 0.527179997 | 0.000795824 | 0.0136425   | Basal       |
| ANXA1    | 0.526354665 | 0.010644787 | 0.044687249 | Basal       |
| MPZL1    | 0.508728407 | 0.008904627 | 0.025990329 | Superficial |
| EHF      | 0.492196041 | 0.010644787 | 0.038910009 | Suprabasal  |
| TRIM33   | 0.489450207 | 0.017811616 | 0.043066688 | Superficial |
| AHNAK    | 0.472580773 | 0.000992312 | 0.014320968 | Basal       |
| THUMPD2  | 0.45263715  | 0.021001058 | 0.04834985  | Superficial |
| STK38    | 0.448032161 | 0.001526458 | 0.013165538 | Suprabasal  |
| FNBP1    | 0.441580425 | 0.003462059 | 0.019935309 | Suprabasal  |
| EIF4G3   | 0.421871801 | 0.012681065 | 0.033478436 | Superficial |
| PLD1     | 0.416621216 | 0.010644787 | 0.044687249 | Basal       |
| BAIAP2L1 | 0.414981604 | 0.000992312 | 0.014320968 | Basal       |
| SMG7     | 0.408190956 | 0.015054848 | 0.048244165 | Suprabasal  |

|          |              |             |             |             |
|----------|--------------|-------------|-------------|-------------|
| DNAJC21  | 0.40361818   | 0.000992312 | 0.008042817 | Superficial |
| N4BP1    | 0.398063677  | 0.000992312 | 0.011395032 | Suprabasal  |
| TULP4    | 0.387329406  | 0.001526458 | 0.013165538 | Suprabasal  |
| SETD5    | 0.377610281  | 0.005105016 | 0.024729592 | Suprabasal  |
| CAPN2    | 0.36891271   | 0.015054848 | 0.048244165 | Suprabasal  |
| KLF5     | 0.366989473  | 0.004211401 | 0.016013117 | Superficial |
| PARD3    | 0.323072656  | 0.002836074 | 0.018003296 | Suprabasal  |
| PHACTR4  | 0.32155259   | 0.015054848 | 0.048244165 | Suprabasal  |
| PRKCH    | 0.310775043  | 0.010644787 | 0.044687249 | Basal       |
| C6orf136 | 0.282069153  | 0.003462059 | 0.024854712 | Basal       |
| ASAH1    | -0.265541854 | 0.008904627 | 0.040392504 | Basal       |
| IL20RB   | -0.323659215 | 0.012681065 | 0.04332227  | Suprabasal  |
| CTSZ     | -0.330853459 | 0.010644787 | 0.044687249 | Basal       |
| SLC1A4   | -0.543851368 | 0.004211401 | 0.027185186 | Basal       |
| MPPED2   | -0.688191794 | 0.012681065 | 0.049425568 | Basal       |
| PTGR1    | -0.715961366 | 0.001883197 | 0.018415354 | Basal       |
| TGFBI    | -0.82611949  | 0.001526458 | 0.016792744 | Basal       |
| SPRY1    | -0.831851276 | 0.008904627 | 0.034887819 | Suprabasal  |
| FHL2     | -0.954787117 | 0.000317696 | 0.012455402 | Basal       |
| EPCAM    | -1.00287481  | 0.021001058 | 0.04834985  | Superficial |
| LFNG     | -1.036801606 | 0.000992312 | 0.014320968 | Basal       |
| ANKH     | -1.06813916  | 0.000119764 | 0.012455402 | Basal       |
| ARMCX1   | -1.100766717 | 0.000317696 | 0.012455402 | Basal       |
| SORBS2   | -1.125942002 | 0.000635975 | 0.012925379 | Basal       |
| CYYR1    | -1.222114319 | 0.001883197 | 0.018415354 | Basal       |
| PFN2     | -1.249675777 | 0.000795824 | 0.0136425   | Basal       |
| EFEMP1   | -1.268342154 | 0.000196466 | 0.012455402 | Basal       |
| TGM3     | -1.398053373 | 0.001883197 | 0.014590393 | Suprabasal  |
| SYT17    | -1.411928301 | 0.008904627 | 0.025990329 | Superficial |
| GHR      | -1.424445437 | 0.000250281 | 0.012455402 | Basal       |
| STXBP1   | -1.605053536 | 0.006166656 | 0.020290909 | Superficial |
| ALOX12   | -1.646262518 | 0.012681065 | 0.04332227  | Suprabasal  |
| NGEF     | -1.697118232 | 0.000992312 | 0.011395032 | Suprabasal  |
| ZNF365   | -1.723119785 | 0.008904627 | 0.025990329 | Superficial |
| PLB1     | -1.805722624 | 0.001883197 | 0.010234018 | Superficial |
| DHRS9    | -2.379799313 | 0.000250281 | 0.007176147 | Superficial |
| TGM7     | -2.419284932 | 0.01017129  | 0.029507311 | Superficial |
| IL1A     | -2.497686606 | 0.003462059 | 0.014108599 | Superficial |
| RAI14    | -2.779671032 | 0.000317696 | 0.007176147 | Superficial |
| SULT1B1  | -3.339062081 | 0.000182524 | 0.007176147 | Superficial |

**Supplemental Table 9.** List of antibodies used in the study.

| <b>Antibody</b> | <b>Company</b>              | <b>Clone</b> | <b>Catalog #</b> | <b>Assay</b>     | <b>Concentration</b> | <b>Secondary / Conjugate</b> |
|-----------------|-----------------------------|--------------|------------------|------------------|----------------------|------------------------------|
| anti-KI-67      | Abcam                       | SP6          | 16667            | IHC              | 1:100                | goat anti-rabbit             |
| anti-SOX2       | Cell Signaling              | D1C7J        | 14962S           | IHC              | 1:500                | goat anti-rabbit             |
| anti-KLF5       | Sigma-Aldrich               | Polyclonal   | HPA040398        | IHC              | 1:150                | goat anti-rabbit             |
| anti-KRT14      | Cell Signaling              | LL002        | 48020            | Multispectral IF | 1:200                | Opal 540                     |
| anti-P63        | ABclonal                    | ARC0131      | A19652           | Multispectral IF | 1:100                | Opal 690                     |
| anti-IVL        | Santa Cruz<br>Biotechnology | SY5          | sc-21748         | Multispectral IF | 1:500                | Opal 520                     |
| anti-CNFN       | Novus Biologicals           | Polyclonal   | NBP2-14668       | Multispectral IF | 1:200                | Opal 570                     |
